# Supplementary material for: Expansion of the quality of care index on breast cancer and its risk factors using the global burden of disease study 2019
Source: PubMed Central journal article supplement (PMC9883412; doi:10.1002/cam4.4951), 2022-06-30
Supplement: CAM4-12-1729-s001.pdf [file CAM4-12-1729-s001.pdf]

Supplementary table 1. The regional, socio-demographic index (SDI) quintiles, and national trend of epidemiologic indices of breast cancer, number for all-ages and age-standardized rates with 95% uncertainty interval (UI), for each and both sexes, in 1990 and 2019.

|                              |        | 1990                         |                        |                              |                           |                              |                        |                              |                           |                                    |                        |                                        | 2019                      |                              |                        |                               |                           |                              |                        |                              |                           |                                    |                        |                                        |                           |
|------------------------------|--------|------------------------------|------------------------|------------------------------|---------------------------|------------------------------|------------------------|------------------------------|---------------------------|------------------------------------|------------------------|----------------------------------------|---------------------------|------------------------------|------------------------|-------------------------------|---------------------------|------------------------------|------------------------|------------------------------|---------------------------|------------------------------------|------------------------|----------------------------------------|---------------------------|
|                              |        | Incidence                    |                        | Prevalence                   |                           | Deaths                       |                        | YLLs (Years of Life Lost)    |                           | YLDs (Years Lived with Disability) |                        | DALYs (Disability-Adjusted Life Years) |                           | Incidence                    |                        | Prevalence                    |                           | Deaths                       |                        | YLLs (Years of Life Lost)    |                           | YLDs (Years Lived with Disability) |                        | DALYs (Disability-Adjusted Life Years) |                           |
| Location                     | Sex    | Number                       | Rate                   | Number                       | Rate                      | Number                       | Rate                   | Number                       | Rate                      | Number                             | Rate                   | Number                                 | Rate                      | Number                       | Rate                   | Number                        | Rate                      | Number                       | Rate                   | Number                       | Rate                      | Number                             | Rate                   | Number                                 | Rate                      |
| <b>WHO regions</b>           |        |                              |                        |                              |                           |                              |                        |                              |                           |                                    |                        |                                        |                           |                              |                        |                               |                           |                              |                        |                              |                           |                                    |                        |                                        |                           |
| African Region               | Both   | 28096<br>(24284 to 32118)    | 11.4<br>(9.8 to 13.1)  | 190845<br>(168582 to 216032) | 76 (67 to 86)             | 21231<br>(18468 to 24597)    | 9.3 (8.1 to 10.8)      | 677881<br>(591562 to 787120) | 254.1<br>(221 to 295.4)   | 15954<br>(11363 to 21645)          | 6.3 (4.5 to 8.4)       | 693836<br>(603852 to 803996)           | 260.4<br>(226.2 to 302.8) | 92057<br>(78647 to 107212)   | 16.4<br>(14.2 to 18.8) | 657577<br>(570373 to 754512)  | 113.2<br>(99.4 to 128.9)  | 58945<br>(49834 to 68355)    | 11.7 (10 to 13.4)      | 184757<br>(153941 to 218357) | 305.6<br>(257.4 to 357.2) | 53922<br>(37311 to 74116)          | 9.3 (6.5 to 12.6)      | 190149<br>(158692 to 224495)           | 314.9<br>(264.9 to 366.9) |
|                              | Female | 26736<br>(22964 to 30701)    | 21.1 (18 to 24.3)      | 184044<br>(161967 to 208781) | 143.3<br>(125.9 to 162.8) | 20004<br>(17348 to 23339)    | 16.8<br>(14.5 to 19.6) | 648037<br>(564614 to 758877) | 477.9<br>(415.5 to 558.4) | 15207<br>(10771 to 20575)          | 11.7<br>(8.3 to 15.8)  | 663244<br>(576201 to 773253)           | 489.6<br>(425.9 to 573.8) | 89504<br>(76303 to 104339)   | 30 (25.8 to 34.6)      | 642647<br>(557442 to 739377)  | 209.6<br>(183.5 to 239.1) | 56906<br>(47929 to 66423)    | 20.9<br>(17.9 to 24.1) | 179844<br>(149297 to 212446) | 564.4<br>(472.9 to 663.3) | 52401<br>(36154 to 71996)          | 17.1<br>(11.9 to 23.1) | 185084<br>(153710 to 218904)           | 581.4<br>(487.6 to 680.1) |
|                              | Male   | 1360<br>(1148 to 1589)       | 1.4 (1.2 to 1.6)       | 6801<br>(5878 to 7864)       | 6.4 (5.5 to 7.4)          | 1227<br>(1031 to 1442)       | 1.4 (1.1 to 1.6)       | 29844<br>(25181 to 35012)    | 27.3 (23 to 32)           | 747<br>(500 to 1019)               | 0.7 (0.5 to 1)         | 30591<br>(25782 to 35903)              | 28.1<br>(23.7 to 32.9)    | 2553<br>(1981 to 3338)       | 1.3 (1 to 1.6)         | 14930<br>(11912 to 19032)     | 6.7 (5.4 to 8.5)          | 2039<br>(1611 to 2667)       | 1.1 (0.9 to 1.4)       | 49123<br>(38058 to 64747)    | 21.2<br>(16.7 to 27.9)    | 1521<br>(1007 to 2207)             | 0.7 (0.5 to 1)         | 50644<br>(39297 to 66574)              | 21.9<br>(17.3 to 28.8)    |
| Eastern Mediterranean Region | Both   | 27177<br>(22383 to 33173)    | 12.9<br>(10.5 to 16)   | 210473<br>(180725 to 248827) | 100.7<br>(86.6 to 119.8)  | 18352<br>(14883 to 22913)    | 9.3 (7.5 to 11.8)      | 614998<br>(506053 to 751643) | 277.6<br>(226.5 to 343)   | 16340<br>(11204 to 23497)          | 7.7 (5.2 to 11.1)      | 631338<br>(520320 to 770836)           | 285.3<br>(233.1 to 352.5) | 123055<br>(106073 to 143980) | 23.2<br>(20.1 to 27)   | 993214<br>(877022 to 1137741) | 186.7<br>(166.7 to 212.6) | 59880<br>(50719 to 71958)    | 12.5<br>(10.7 to 14.8) | 202725<br>(169422 to 245720) | 366.6<br>(309.5 to 441.7) | 76870<br>(54066 to 105716)         | 14.3<br>(10.1 to 19.5) | 210412<br>(176786 to 253811)           | 380.9<br>(323 to 454.8)   |
|                              | Female | 26380<br>(21586 to 32374)    | 26 (21 to 32.3)        | 206161<br>(176633 to 244449) | 205.9<br>(176.1 to 246.3) | 17630<br>(14107 to 22187)    | 18.5<br>(14.5 to 23.6) | 598542<br>(488807 to 735051) | 562.3<br>(455.1 to 700.1) | 15889<br>(10869 to 22965)          | 15.5<br>(10.5 to 22.5) | 614431<br>(502904 to 754446)           | 577.8<br>(467.8 to 719)   | 121096<br>(104300 to 142149) | 47.6 (41 to 55.6)      | 980703<br>(864296 to 1125232) | 384.5<br>(342.7 to 438.2) | 58460<br>(49389 to 70621)    | 25.2<br>(21.4 to 30.2) | 199178<br>(166107 to 241705) | 751.7<br>(632 to 909.2)   | 75639<br>(53062 to 104208)         | 29.3<br>(20.7 to 40.2) | 206742<br>(173624 to 250465)           | 781<br>(659.5 to 936.7)   |
|                              | Male   | 797<br>(636 to 988)          | 1 (0.7 to 1.2)         | 4313<br>(3609 to 5149)       | 4.6 (3.8 to 5.6)          | 722<br>(569 to 901)          | 0.9 (0.7 to 1.2)       | 16456<br>(13351 to 20210)    | 17.6<br>(14.1 to 21.7)    | 451<br>(308 to 616)                | 0.5 (0.3 to 0.7)       | 16907<br>(13768 to 20675)              | 18.1<br>(14.5 to 22.3)    | 1958<br>(1545 to 2464)       | 0.9 (0.7 to 1.2)       | 12511<br>(10147 to 15408)     | 5.6 (4.5 to 6.8)          | 1420<br>(1103 to 1789)       | 0.7 (0.6 to 0.9)       | 35472<br>(27617 to 45070)    | 15.3<br>(11.9 to 19.3)    | 1231<br>(811 to 1694)              | 0.6 (0.4 to 0.8)       | 36703<br>(28696 to 46530)              | 15.9<br>(12.4 to 19.9)    |
| European Region              | Both   | 343405<br>(333745 to 350030) | 33.7<br>(32.8 to 34.3) | 360677<br>(331124 to 395958) | 349.7<br>(323.2 to 383)   | 144156<br>(138348 to 146980) | 14 (13.4 to 14.3)      | 370666<br>(361624 to 376334) | 366.1<br>(357.3 to 371.8) | 250631<br>(176476 to 339633)       | 24.4<br>(17.2 to 33.1) | 395729<br>(384069 to 406443)           | 390.5<br>(379.1 to 401)   | 532667<br>(475502 to 596044) | 37.1<br>(33.2 to 41.7) | 565071<br>(516088 to 620427)  | 386.3<br>(353 to 425.4)   | 170529<br>(155141 to 181504) | 10.8<br>(9.9 to 11.5)  | 374228<br>(350824 to 397870) | 264.3<br>(249 to 280.8)   | 392303<br>(273621 to 538859)       | 27.2<br>(18.9 to 37.5) | 413458<br>(385077 to 443053)           | 291.5<br>(272.6 to 312.6) |
|                              | Female | 341107<br>(331425 to 347780) | 60.2<br>(58.7 to 61.3) | 358648<br>(329232 to 393764) | 616.5<br>(572.7 to 668.3) | 143070<br>(137301 to 145893) | 23.8 (23 to 24.3)      | 368037<br>(358996 to 373746) | 664.1<br>(649.8 to 674.3) | 248789<br>(175223 to 337260)       | 43.5<br>(30.5 to 58.9) | 392916<br>(381384 to 403617)           | 707.6<br>(688.6 to 726)   | 527648<br>(470623 to 590560) | 68.3<br>(61.2 to 76.8) | 560527<br>(512021 to 615486)  | 708.4<br>(648.4 to 780.8) | 168748<br>(153465 to 179630) | 19.1<br>(17.6 to 20.3) | 370437<br>(347196 to 394179) | 489.1<br>(461.2 to 520.8) | 388205<br>(270802 to 533993)       | 50 (34.6 to 69.1)      | 409258<br>(380961 to 438607)           | 539.1<br>(504.6 to 578.2) |
|                              | Male   | 2298<br>(2198 to 2395)       | 0.5 (0.5 to 0.6)       | 20294<br>(18614 to 22225)    | 4.7 (4.3 to 5.2)          | 1085<br>(1041 to 1132)       | 0.3 (0.3 to 0.3)       | 26292<br>(25217 to 27458)    | 5.9 (5.7 to 6.2)          | 1843<br>(1316 to 2476)             | 0.4 (0.3 to 0.6)       | 28134<br>(26852 to 29459)              | 6.4 (6.1 to 6.7)          | 5019<br>(4412 to 5644)       | 0.7 (0.7 to 0.8)       | 45436<br>(40562 to 50956)     | 6.8 (6.1 to 7.6)          | 1780<br>(1626 to 1924)       | 0.3 (0.2 to 0.3)       | 37903<br>(34781 to 40955)    | 5.8 (5.3 to 6.2)          | 4098<br>(2880 to 5576)             | 0.6 (0.4 to 0.8)       | 42001<br>(38327 to 45727)              | 6.4 (5.8 to 6.9)          |
| Region of the Americas       | Both   | 255927<br>(247708 to 261536) | 41.7<br>(40.4 to 42.6) | 254019<br>(238948 to 273321) | 415.7<br>(391.2 to 448.2) | 78707<br>(75358 to 80525)    | 13 (12.4 to 13.3)      | 209411<br>(204142 to 213020) | 340<br>(331.2 to 346)     | 180842<br>(128208 to 244965)       | 29.5<br>(20.9 to 39.9) | 227496<br>(220201 to 235059)           | 369.5<br>(357.4 to 381.9) | 433809<br>(379718 to 493905) | 35 (30.6 to 39.9)      | 441846<br>(394225 to 492102)  | 354.3<br>(315.7 to 394.4) | 119077<br>(110684 to 125852) | 9.4 (8.8 to 10)        | 293186<br>(277732 to 309473) | 240.5<br>(227.7 to 254.1) | 305149<br>(213048 to 415729)       | 24.6<br>(17.2 to 33.5) | 323701<br>(304970 to 344569)           | 265.1<br>(249.8 to 282.1) |

|                        |        | 1990                         |                        |                                 |                           |                              |                        |                                 |                           |                                    |                        |                                        |                           | 2019                         |                        |                                 |                           |                              |                        |                                 |                           |                                    |                        |                                        |                           |
|------------------------|--------|------------------------------|------------------------|---------------------------------|---------------------------|------------------------------|------------------------|---------------------------------|---------------------------|------------------------------------|------------------------|----------------------------------------|---------------------------|------------------------------|------------------------|---------------------------------|---------------------------|------------------------------|------------------------|---------------------------------|---------------------------|------------------------------------|------------------------|----------------------------------------|---------------------------|
|                        |        | Incidence                    |                        | Prevalence                      |                           | Deaths                       |                        | YLLs (Years of Life Lost)       |                           | YLDs (Years Lived with Disability) |                        | DALYs (Disability-Adjusted Life Years) |                           | Incidence                    |                        | Prevalence                      |                           | Deaths                       |                        | YLLs (Years of Life Lost)       |                           | YLDs (Years Lived with Disability) |                        | DALYs (Disability-Adjusted Life Years) |                           |
| Location               | Sex    | Number                       | Rate                   | Number                          | Rate                      | Number                       | Rate                   | Number                          | Rate                      | Number                             | Rate                   | Number                                 | Rate                      | Number                       | Rate                   | Number                          | Rate                      | Number                       | Rate                   | Number                          | Rate                      | Number                             | Rate                   | Number                                 | Rate                      |
|                        | Female | 253801<br>(245573 to 259372) | 76.7<br>(74.4 to 78.4) | 2519974<br>(2370872 to 2711568) | 757.7<br>(715 to 813)     | 78004<br>(74647 to 79840)    | 23.4<br>(22.4 to 23.9) | 2077023<br>(2024371 to 2113215) | 635.7<br>(620.7 to 646.7) | 179110<br>(126904 to 242677)       | 53.9<br>(38.2 to 73.1) | 2256133<br>(2183922 to 2331442)        | 689.6<br>(668 to 712.3)   | 429443<br>(374960 to 489456) | 65.2<br>(57.1 to 74.3) | 4378078<br>(3903111 to 4881044) | 657.4<br>(584.6 to 733.2) | 117666<br>(109358 to 124410) | 17.2<br>(16.1 to 18.1) | 2899437<br>(2746515 to 3061600) | 451.2<br>(427.5 to 476.9) | 301673<br>(210576 to 411683)       | 45.7<br>(31.9 to 62.4) | 3201110<br>(3015772 to 3408746)        | 496.9<br>(467.8 to 528.9) |
|                        | Male   | 2126<br>(2040 to 2216)       | 0.8 (0.7 to 0.8)       | 20221<br>(18672 to 22216)       | 7.4 (6.8 to 8.1)          | 703<br>(678 to 728)          | 0.3 (0.3 to 0.3)       | 17095<br>(16534 to 17678)       | 6.1 (5.9 to 6.3)          | 1732<br>(1234 to 2295)             | 0.6 (0.4 to 0.8)       | 18827<br>(18019 to 19659)              | 6.7 (6.4 to 7)            | 4366<br>(3727 to 5122)       | 0.7 (0.6 to 0.9)       | 40389<br>(34994 to 46847)       | 6.9 (6 to 8)              | 1412<br>(1307 to 1510)       | 0.2 (0.2 to 0.3)       | 32431<br>(30314 to 34697)       | 5.6 (5.2 to 6)            | 3476<br>(2403 to 4723)             | 0.6 (0.4 to 0.8)       | 35906<br>(33440 to 38546)              | 6.2 (5.7 to 6.6)          |
| South-East Asia Region | Both   | 74752<br>(66072 to 83795)    | 8.8 (7.9 to 9.9)       | 564436<br>(504923 to 628434)    | 67.7<br>(60.5 to 75.9)    | 51672<br>(45486 to 58308)    | 6.6 (5.8 to 7.5)       | 1827660<br>(1605043 to 2060630) | 202.2<br>(178.3 to 228.1) | 44500<br>(30825 to 59628)          | 5.2 (3.6 to 7)         | 1872160<br>(1644110 to 2113920)        | 207.4<br>(183 to 233.6)   | 253080<br>(214124 to 295646) | 13.4<br>(11.3 to 15.6) | 2039248<br>(1766067 to 2352060) | 107.3<br>(93.2 to 123.1)  | 137718<br>(115463 to 162319) | 7.7 (6.5 to 9)         | 4408510<br>(3690361 to 5214249) | 227.5<br>(190.8 to 269.2) | 156593<br>(108747 to 217542)       | 8.2 (5.7 to 11.4)      | 4565103<br>(3832557 to 5373939)        | 235.7<br>(198.1 to 277.4) |
|                        | Female | 73049<br>(64441 to 82111)    | 17.5<br>(15.5 to 19.6) | 554364<br>(495472 to 617995)    | 135<br>(120.8 to 151.2)   | 50253<br>(44123 to 56859)    | 12.9<br>(11.3 to 14.6) | 1789268<br>(1567944 to 2029285) | 404.4<br>(355.5 to 457.3) | 43480<br>(30043 to 58310)          | 10.3<br>(7.1 to 13.8)  | 1832748<br>(1606960 to 2074388)        | 414.7<br>(365.1 to 468.5) | 250266<br>(211148 to 292317) | 26 (22 to 30.4)        | 2018939<br>(1746793 to 2330746) | 209.2<br>(181.5 to 240.6) | 135751<br>(113674 to 160384) | 14.7<br>(12.3 to 17.4) | 4357350<br>(3636515 to 5165128) | 445<br>(372.1 to 527.6)   | 154668<br>(107140 to 215120)       | 16 (11.1 to 22.2)      | 4512018<br>(3779387 to 5324973)        | 461<br>(386.4 to 543.8)   |
|                        | Male   | 1703<br>(1404 to 2034)       | 0.5 (0.4 to 0.6)       | 10072<br>(8429 to 11829)        | 2.8 (2.3 to 3.3)          | 1419<br>(1177 to 1695)       | 0.5 (0.4 to 0.6)       | 38392<br>(31655 to 45954)       | 10.5<br>(8.7 to 12.5)     | 1020<br>(676 to 1402)              | 0.3 (0.2 to 0.4)       | 39412<br>(32749 to 47135)              | 10.8 (9 to 12.8)          | 2814<br>(2256 to 3400)       | 0.3 (0.3 to 0.4)       | 20309<br>(16671 to 24072)       | 2.4 (2 to 2.8)            | 1967<br>(1562 to 2363)       | 0.3 (0.2 to 0.3)       | 51160<br>(40601 to 61740)       | 5.8 (4.6 to 7)            | 1925<br>(1315 to 2670)             | 0.2 (0.2 to 0.3)       | 53085<br>(42248 to 63888)              | 6.1 (4.8 to 7.3)          |
| Western Pacific Region | Both   | 144946<br>(129669 to 160839) | 11.3<br>(10.2 to 12.5) | 1463594<br>(1298310 to 1629771) | 117.9<br>(104.8 to 132)   | 65698<br>(58278 to 73500)    | 5.5 (4.9 to 6.1)       | 2114312<br>(1857967 to 2395215) | 159.3<br>(140.5 to 179.7) | 103382<br>(70903 to 141225)        | 8.1 (5.6 to 11.1)      | 2217694<br>(1968608 to 2502191)        | 167.5<br>(149.1 to 188.2) | 559786<br>(471584 to 654430) | 20.8<br>(17.5 to 24.3) | 5451621<br>(4716294 to 6224472) | 201.7<br>(174.5 to 230.2) | 152144<br>(131692 to 174664) | 5.7 (4.9 to 6.5)       | 4219762<br>(3639707 to 4870801) | 156.8<br>(135.1 to 180.9) | 395224<br>(266142 to 552147)       | 14.7<br>(9.9 to 20.4)  | 4614985<br>(4021923 to 5267122)        | 171.5<br>(149.3 to 195.5) |
|                        | Female | 143889<br>(128641 to 159815) | 22.1<br>(19.8 to 24.5) | 1455110<br>(1290803 to 1620261) | 227.4<br>(201.7 to 253.9) | 64986<br>(57564 to 72800)    | 10.4<br>(9.2 to 11.6)  | 2095075<br>(1840488 to 2375168) | 315.4<br>(277.4 to 356.6) | 102619<br>(70399 to 140158)        | 15.8<br>(10.9 to 21.6) | 2197694<br>(1949853 to 2481468)        | 331.2<br>(294.3 to 373)   | 551442<br>(463836 to 646269) | 40.2<br>(33.7 to 47.3) | 5387097<br>(4650507 to 6156335) | 390.1<br>(336.9 to 447.2) | 148704<br>(128533 to 170771) | 10.6<br>(9.1 to 12.2)  | 4130152<br>(3555789 to 4776147) | 303.3<br>(260.9 to 351)   | 389012<br>(260749 to 544120)       | 28.4 (19 to 39.6)      | 4519164<br>(3927197 to 5172192)        | 331.7<br>(288.1 to 379.6) |
|                        | Male   | 1056<br>(919 to 1202)        | 0.2 (0.2 to 0.2)       | 8484<br>(7309 to 10023)         | 1.5 (1.3 to 1.7)          | 712<br>(611 to 822)          | 0.2 (0.1 to 0.2)       | 19236<br>(16485 to 22285)       | 3.3 (2.8 to 3.8)          | 764<br>(527 to 1044)               | 0.1 (0.1 to 0.2)       | 20000<br>(17210 to 23070)              | 3.4 (3 to 3.9)            | 8344<br>(6596 to 10226)      | 0.6 (0.5 to 0.8)       | 64525<br>(52030 to 78145)       | 4.8 (3.9 to 5.8)          | 3440<br>(2774 to 4202)       | 0.3 (0.2 to 0.3)       | 89610<br>(71309 to 110346)      | 6.7 (5.3 to 8.1)          | 6212<br>(4079 to 8774)             | 0.5 (0.3 to 0.7)       | 95821<br>(77099 to 116738)             | 7.1 (5.8 to 8.6)          |
| SDI Quintiles          |        |                              |                        |                                 |                           |                              |                        |                                 |                           |                                    |                        |                                        |                           |                              |                        |                                 |                           |                              |                        |                                 |                           |                                    |                        |                                        |                           |
| High-middle SDI        | Both   | 228474<br>(220963 to 236309) | 20.9<br>(20.2 to 21.6) | 2275451<br>(2104669 to 2483654) | 210.5<br>(194 to 230.7)   | 104535<br>(100730 to 108322) | 10 (9.6 to 10.3)       | 3009691<br>(2898295 to 3133701) | 271.7<br>(261.6 to 282.8) | 159733<br>(112868 to 215243)       | 14.6<br>(10.4 to 19.7) | 3169424<br>(3050872 to 3304081)        | 286.4<br>(275.4 to 298.4) | 516502<br>(464353 to 574104) | 26 (23.3 to 28.9)      | 5060863<br>(4610380 to 5543887) | 253.3<br>(231.3 to 277.7) | 165934<br>(152738 to 179587) | 8.3 (7.6 to 9)         | 4209032<br>(3887629 to 4580010) | 212.3<br>(196.2 to 230.8) | 361221<br>(248880 to 490409)       | 18.2<br>(12.5 to 24.7) | 4570253<br>(4209331 to 4954003)        | 230.4<br>(212.2 to 249.9) |
|                        | Female | 226752<br>(219258 to 234580) | 38.5<br>(37.2 to 39.9) | 2261068<br>(2090814 to 2468283) | 382.3<br>(354.1 to 416.3) | 103595<br>(99756 to 107384)  | 17.7 (17 to 18.3)      | 2984992<br>(2874164 to 3108809) | 507.5<br>(488.3 to 528.9) | 158421<br>(111907 to 213533)       | 26.8 (19 to 36.1)      | 3143413<br>(3024849 to 3277610)        | 534.3<br>(513.6 to 557.3) | 510299<br>(458379 to 567966) | 48.9<br>(43.8 to 54.5) | 5009632<br>(4556925 to 5490445) | 475.7<br>(433.3 to 522.4) | 163520<br>(150455 to 177185) | 14.9<br>(13.8 to 16.2) | 4150729<br>(3829777 to 4520391) | 400.8<br>(369.6 to 436.9) | 356436<br>(245880 to 484148)       | 34.1<br>(23.5 to 46.5) | 4507165<br>(4147354 to 4888828)        | 435<br>(400.7 to 473.3)   |
|                        | Male   | 1722<br>(1635 to 1821)       | 0.4 (0.4 to 0.4)       | 14383<br>(13172 to 15846)       | 3.1 (2.8 to 3.4)          | 941<br>(887 to 1002)         | 0.2 (0.2 to 0.2)       | 24699<br>(23301 to 26327)       | 5 (4.7 to 5.4)            | 1311<br>(931 to 1776)              | 0.3 (0.2 to 0.4)       | 26011<br>(24391 to 27794)              | 5.3 (5 to 5.7)            | 6204<br>(5442 to 7073)       | 0.7 (0.6 to 0.8)       | 51231<br>(45201 to 58099)       | 5.5 (4.9 to 6.3)          | 2414<br>(2160 to 2691)       | 0.3 (0.2 to 0.3)       | 58303<br>(51928 to 65517)       | 6.2 (5.6 to 7)            | 4785<br>(3344 to 6569)             | 0.5 (0.4 to 0.7)       | 63088<br>(56278 to 70527)              | 6.7 (6 to 7.5)            |

|                |        | 1990                         |                        |                               |                           |                              |                        |                              |                           |                                    |                       |                                        | 2019                      |                              |                        |                              |                           |                              |                        |                              |                           |                                    |                        |                                        |                           |
|----------------|--------|------------------------------|------------------------|-------------------------------|---------------------------|------------------------------|------------------------|------------------------------|---------------------------|------------------------------------|-----------------------|----------------------------------------|---------------------------|------------------------------|------------------------|------------------------------|---------------------------|------------------------------|------------------------|------------------------------|---------------------------|------------------------------------|------------------------|----------------------------------------|---------------------------|
|                |        | Incidence                    |                        | Prevalence                    |                           | Deaths                       |                        | YLLs (Years of Life Lost)    |                           | YLDs (Years Lived with Disability) |                       | DALYs (Disability-Adjusted Life Years) |                           | Incidence                    |                        | Prevalence                   |                           | Deaths                       |                        | YLLs (Years of Life Lost)    |                           | YLDs (Years Lived with Disability) |                        | DALYs (Disability-Adjusted Life Years) |                           |
| Location       | Sex    | Number                       | Rate                   | Number                        | Rate                      | Number                       | Rate                   | Number                       | Rate                      | Number                             | Rate                  | Number                                 | Rate                      | Number                       | Rate                   | Number                       | Rate                      | Number                       | Rate                   | Number                       | Rate                      | Number                             | Rate                   | Number                                 | Rate                      |
| High SDI       | Both   | 431076<br>(416846 to 440218) | 43.2<br>(41.8 to 44.1) | 459402<br>(425408 to 503299)  | 456.3<br>(424.9 to 496.3) | 137445<br>(130744 to 140804) | 13.5<br>(12.9 to 13.9) | 339274<br>(329384 to 344799) | 345.5<br>(335.9 to 351.1) | 321046<br>(226067 to 433570)       | 32 (22.5 to 43.4)     | 371379<br>(358630 to 384510)           | 377.5<br>(364.8 to 390.7) | 678945<br>(606880 to 753696) | 41.2<br>(36.9 to 45.6) | 750910<br>(683819 to 819681) | 444.5<br>(403.8 to 483.4) | 167553<br>(151809 to 176807) | 9 (8.4 to 9.5)         | 356929<br>(337081 to 371161) | 221.6<br>(211.8 to 230)   | 514552<br>(357984 to 693878)       | 31.1<br>(21.4 to 42)   | 408385<br>(381626 to 435464)           | 252.7<br>(237.7 to 269.3) |
|                | Female | 428085<br>(413890 to 437161) | 79.3 (77 to 80.9)      | 456474<br>(422689 to 500057)  | 828.1<br>(774 to 893.8)   | 136472<br>(129811 to 139840) | 23.9<br>(22.8 to 24.4) | 337046<br>(327207 to 342593) | 644.5<br>(628.6 to 654.5) | 318518<br>(224194 to 429954)       | 58.5 (41 to 79.6)     | 368898<br>(356225 to 381943)           | 703.1<br>(680.2 to 726.6) | 673148<br>(601265 to 747674) | 79.2<br>(70.8 to 87.7) | 745171<br>(678209 to 813795) | 849.9<br>(771.3 to 923.9) | 165968<br>(150337 to 175159) | 16.7<br>(15.6 to 17.5) | 353685<br>(333927 to 367853) | 427.9<br>(409.3 to 443.9) | 509631<br>(354158 to 687426)       | 59.6<br>(40.9 to 80.6) | 404648<br>(377969 to 431558)           | 487.5<br>(459.8 to 518.8) |
|                | Male   | 2991<br>(2876 to 3107)       | 0.7 (0.6 to 0.7)       | 29284<br>(26882 to 32139)     | 6.7 (6.1 to 7.3)          | 972<br>(939 to 1003)         | 0.2 (0.2 to 0.2)       | 22283<br>(21681 to 22926)    | 5 (4.9 to 5.1)            | 2528<br>(1799 to 3371)             | 0.6 (0.4 to 0.8)      | 24811<br>(23732 to 25928)              | 5.6 (5.3 to 5.8)          | 5797<br>(5055 to 6621)       | 0.7 (0.6 to 0.8)       | 57392<br>(50405 to 65367)    | 7 (6.2 to 8)              | 1586<br>(1460 to 1703)       | 0.2 (0.2 to 0.2)       | 32440<br>(30172 to 34629)    | 4.1 (3.8 to 4.4)          | 4921<br>(3411 to 6646)             | 0.6 (0.4 to 0.8)       | 37361<br>(34536 to 40383)              | 4.7 (4.3 to 5.1)          |
| Low-middle SDI | Both   | 66098<br>(58235 to 74326)    | 9.6 (8.4 to 10.7)      | 489370<br>(441720 to 546573)  | 71.3<br>(64.1 to 80.1)    | 46520<br>(40557 to 52302)    | 7.2 (6.2 to 8.1)       | 157892<br>(139679 to 178025) | 214.7<br>(188.6 to 241.8) | 38598<br>(27084 to 51428)          | 5.5 (3.9 to 7.4)      | 161751<br>(142798 to 182602)           | 220.2<br>(193.3 to 247.9) | 230747<br>(202809 to 259274) | 15.4<br>(13.5 to 17.3) | 178897<br>(160309 to 199634) | 118.3<br>(106.2 to 131.9) | 127410<br>(110474 to 144919) | 8.9 (7.8 to 10.2)      | 405557<br>(349701 to 463346) | 262.5<br>(227.4 to 299.5) | 139272<br>(100005 to 187971)       | 9.2 (6.6 to 12.3)      | 419485<br>(362248 to 478599)           | 271.7<br>(235.4 to 309.3) |
|                | Female | 64493<br>(56625 to 72656)    | 18.8<br>(16.3 to 21.1) | 480405<br>(432595 to 536840)  | 141.3<br>(126.8 to 158.9) | 45114<br>(39220 to 50962)    | 14 (11.9 to 15.8)      | 154346<br>(135840 to 174935) | 425.6<br>(371.7 to 480.7) | 37672<br>(26407 to 50341)          | 10.9<br>(7.6 to 14.6) | 158113<br>(139011 to 178999)           | 436.5<br>(382 to 493)     | 227241<br>(199107 to 256008) | 29.5<br>(25.9 to 33.2) | 176581<br>(158032 to 197361) | 227.8<br>(204.3 to 254.2) | 124911<br>(107972 to 142594) | 16.9<br>(14.6 to 19.2) | 399163<br>(343336 to 457686) | 505.9<br>(436.8 to 579.1) | 136988<br>(98261 to 185102)        | 17.6<br>(12.7 to 23.7) | 412862<br>(355463 to 472056)           | 523.5<br>(452.1 to 597.2) |
|                | Male   | 1605<br>(1338 to 1899)       | 0.6 (0.5 to 0.7)       | 8965<br>(7567 to 10436)       | 3 (2.5 to 3.5)            | 1406<br>(1176 to 1667)       | 0.6 (0.5 to 0.7)       | 35456<br>(29867 to 41988)    | 11.8<br>(9.9 to 13.9)     | 925<br>(629 to 1259)               | 0.3 (0.2 to 0.4)      | 36381<br>(30708 to 43063)              | 12.1<br>(10.1 to 14.3)    | 3506<br>(2968 to 4066)       | 0.5 (0.5 to 0.6)       | 23153<br>(19919 to 26400)    | 3.4 (3 to 3.9)            | 2500<br>(2104 to 2917)       | 0.4 (0.3 to 0.5)       | 63945<br>(54041 to 74443)    | 9.3 (7.8 to 10.8)         | 2284<br>(1599 to 3045)             | 0.3 (0.2 to 0.5)       | 66228<br>(56224 to 77023)              | 9.6 (8.1 to 11.2)         |
| Low SDI        | Both   | 24854<br>(20722 to 28759)    | 9.2 (7.7 to 10.8)      | 165833<br>(144562 to 188465)  | 61.1<br>(53.2 to 69.8)    | 19514<br>(16313 to 22898)    | 7.8 (6.5 to 9.3)       | 652513<br>(550780 to 754607) | 223.7<br>(188 to 261.3)   | 13922<br>(9786 to 18843)           | 5.1 (3.6 to 6.8)      | 666435<br>(563641 to 771958)           | 228.7<br>(192.2 to 266.8) | 81318<br>(70923 to 92857)    | 13.4<br>(11.8 to 15.1) | 574998<br>(507286 to 647769) | 92.4<br>(82.3 to 103.4)   | 54467<br>(47490 to 62057)    | 9.8 (8.6 to 11.1)      | 179013<br>(155548 to 205160) | 276.2<br>(240.8 to 316)   | 47250<br>(33428 to 63957)          | 7.6 (5.4 to 10.1)      | 183738<br>(159978 to 210174)           | 283.8<br>(248.2 to 323.4) |
|                | Female | 23569<br>(19452 to 27524)    | 17.4<br>(14.2 to 20.5) | 159609<br>(138159 to 182481)  | 118.1<br>(102 to 135.3)   | 18319<br>(15135 to 21683)    | 14.4<br>(11.8 to 17.4) | 623105<br>(522154 to 724562) | 428.3<br>(355.5 to 503)   | 13226<br>(9240 to 17927)           | 9.6 (6.7 to 13)       | 636330<br>(533366 to 739558)           | 437.9<br>(363.6 to 513.7) | 79445<br>(69198 to 90893)    | 25.7<br>(22.5 to 29.1) | 562126<br>(494493 to 635877) | 177.7<br>(158.1 to 199.5) | 52546<br>(45728 to 60015)    | 18.3 (16 to 20.8)      | 174317<br>(151081 to 200018) | 529.6<br>(461.8 to 607.4) | 45927<br>(32241 to 62245)          | 14.5<br>(10.3 to 19.3) | 178909<br>(155412 to 205171)           | 544<br>(475.6 to 621.6)   |
|                | Male   | 1284<br>(1070 to 1506)       | 1.2 (1 to 1.4)         | 6224<br>(5288 to 7203)        | 5.4 (4.6 to 6.2)          | 1196<br>(992 to 1386)        | 1.3 (1 to 1.5)         | 29408<br>(24723 to 34194)    | 24.8<br>(20.7 to 28.8)    | 696<br>(471 to 935)                | 0.6 (0.4 to 0.8)      | 30104<br>(25344 to 35016)              | 25.5<br>(21.2 to 29.5)    | 1873<br>(1488 to 2452)       | 0.8 (0.6 to 1.1)       | 12872<br>(10519 to 16304)    | 5.2 (4.3 to 6.5)          | 1920<br>(1525 to 2525)       | 0.9 (0.7 to 1.2)       | 46959<br>(36996 to 62598)    | 18.2<br>(14.4 to 24.1)    | 1323<br>(907 to 1962)              | 0.5 (0.4 to 0.8)       | 48283<br>(38036 to 64317)              | 18.8<br>(14.9 to 24.7)    |
| Middle SDI     | Both   | 125965<br>(116279 to 136062) | 10.7<br>(9.9 to 11.5)  | 107122<br>(978418 to 1167494) | 91.7<br>(83.3 to 100.8)   | 72640<br>(67619 to 78672)    | 6.7 (6.2 to 7.2)       | 242628<br>(225295 to 263189) | 195.7<br>(181.9 to 212.2) | 79755<br>(55704 to 106840)         | 6.7 (4.7 to 8.9)      | 250603<br>(233444 to 272172)           | 202.4<br>(188.6 to 218.9) | 492444<br>(436591 to 552088) | 18.5<br>(16.4 to 20.7) | 433848<br>(388613 to 480795) | 162.3<br>(145.5 to 179.4) | 184787<br>(166334 to 205342) | 7.3 (6.6 to 8.1)       | 560120<br>(503973 to 623066) | 207.8<br>(187.1 to 230.7) | 322153<br>(225480 to 441351)       | 12 (8.4 to 16.5)       | 592335<br>(531852 to 655861)           | 219.9<br>(197.4 to 243.2) |
|                | Female | 124201<br>(114516 to 134278) | 20.8<br>(19.3 to 22.5) | 105972<br>(967220 to 1155963) | 179.3<br>(163.1 to 197)   | 71269<br>(66322 to 77262)    | 12.7<br>(11.8 to 13.7) | 239042<br>(222043 to 259513) | 386.4<br>(358.4 to 419.1) | 78642<br>(54924 to 105362)         | 13.1<br>(9.2 to 17.5) | 246906<br>(229710 to 268130)           | 399.5<br>(372 to 433.1)   | 485834<br>(430215 to 545187) | 35.5<br>(31.5 to 39.8) | 428443<br>(383349 to 475088) | 312.5<br>(279.6 to 346.6) | 181116<br>(162719 to 201671) | 13.7<br>(12.3 to 15.2) | 550643<br>(494479 to 612547) | 399.8<br>(359.1 to 444.9) | 316949<br>(221711 to 433539)       | 23.1<br>(16.2 to 31.6) | 582338<br>(522361 to 645565)           | 422.9<br>(378.6 to 468.9) |

|                |        | 1990                   |                     |                           |                        |                        |                     |                           |                        |                                    |                     |                                        | 2019                   |                        |                      |                           |                         |                        |                     |                            |                         |                                    |                     |                                        |                         |
|----------------|--------|------------------------|---------------------|---------------------------|------------------------|------------------------|---------------------|---------------------------|------------------------|------------------------------------|---------------------|----------------------------------------|------------------------|------------------------|----------------------|---------------------------|-------------------------|------------------------|---------------------|----------------------------|-------------------------|------------------------------------|---------------------|----------------------------------------|-------------------------|
|                |        | Incidence              |                     | Prevalence                |                        | Deaths                 |                     | YLLs (Years of Life Lost) |                        | YLDs (Years Lived with Disability) |                     | DALYs (Disability-Adjusted Life Years) |                        | Incidence              |                      | Prevalence                |                         | Deaths                 |                     | YLLs (Years of Life Lost)  |                         | YLDs (Years Lived with Disability) |                     | DALYs (Disability-Adjusted Life Years) |                         |
| Location       | Sex    | Number                 | Rate                | Number                    | Rate                   | Number                 | Rate                | Number                    | Rate                   | Number                             | Rate                | Number                                 | Rate                   | Number                 | Rate                 | Number                    | Rate                    | Number                 | Rate                | Number                     | Rate                    | Number                             | Rate                | Number                                 | Rate                    |
|                | Male   | 1765<br>(1581 to 1957) | 0.4 (0.3 to 0.4)    | 11508<br>(10249 to 12880) | 2.2 (2 to 2.5)         | 1371<br>(1218 to 1528) | 0.3 (0.3 to 0.4)    | 35859<br>(32212 to 39814) | 6.9 (6.2 to 7.7)       | 1113<br>(785 to 1484)              | 0.2 (0.2 to 0.3)    | 36973<br>(33171 to 41010)              | 7.1 (6.4 to 7.9)       | 6611<br>(5511 to 7679) | 0.5 (0.5 to 0.6)     | 54053<br>(45424 to 62785) | 4.3 (3.7 to 5)          | 3670<br>(3126 to 4227) | 0.3 (0.3 to 0.4)    | 94774<br>(80587 to 109525) | 7.5 (6.4 to 8.7)        | 5205<br>(3586 to 7207)             | 0.4 (0.3 to 0.6)    | 99979<br>(84797 to 115476)             | 7.9 (6.7 to 9.1)        |
| Countries      |        |                        |                     |                           |                        |                        |                     |                           |                        |                                    |                     |                                        |                        |                        |                      |                           |                         |                        |                     |                            |                         |                                    |                     |                                        |                         |
| Afghanistan    | Both   | 671<br>(524 to 858)    | 9 (7.1 to 11.5)     | 4836<br>(3961 to 5873)    | 64.8 (53.1 to 78.8)    | 526<br>(414 to 671)    | 7.3 (5.8 to 9.2)    | 17856<br>(13703 to 23102) | 234.3 (180.6 to 301.6) | 390<br>(260 to 567)                | 5.2 (3.5 to 7.5)    | 18245<br>(14012 to 23568)              | 239.5 (184.4 to 307.6) | 1988<br>(1486 to 2606) | 11.6 (8.8 to 15.1)   | 14052<br>(10896 to 17995) | 79.6 (63.6 to 99.8)     | 1311<br>(987 to 1705)  | 8.7 (6.6 to 11.2)   | 48054<br>(35874 to 63721)  | 255.7 (192.3 to 334.9)  | 1157<br>(744 to 1685)              | 6.5 (4.3 to 9.2)    | 49211<br>(36828 to 65071)              | 262.3 (198.1 to 342.8)  |
|                | Female | 644<br>(497 to 829)    | 17.1 (13.4 to 21.7) | 4693<br>(3835 to 5734)    | 124.9 (102.8 to 151.6) | 501<br>(389 to 642)    | 13.9 (11 to 17.5)   | 17181<br>(13140 to 22140) | 437 (336 to 561.2)     | 374<br>(248 to 547)                | 9.8 (6.6 to 14.2)   | 17555<br>(13344 to 22678)              | 446.8 (342.1 to 573.5) | 1951<br>(1451 to 2561) | 22.3 (16.8 to 29.1)  | 13823<br>(10691 to 17817) | 153.1 (121.8 to 192.8)  | 1281<br>(964 to 1673)  | 16.5 (12.5 to 21.3) | 47124<br>(35205 to 62592)  | 493.7 (370.6 to 648.3)  | 1134<br>(729 to 1655)              | 12.5 (8.2 to 17.8)  | 48258<br>(36046 to 63895)              | 506.2 (380.9 to 663.4)  |
|                | Male   | 28 (13 to 52)          | 0.8 (0.4 to 1.4)    | 142 (77 to 252)           | 3.8 (2.2 to 6.5)       | 25 (13 to 47)          | 0.7 (0.4 to 1.3)    | 674<br>(317 to 1272)      | 17.7 (8.5 to 32.9)     | 16 (7 to 30)                       | 0.4 (0.2 to 0.8)    | 690<br>(324 to 1301)                   | 18.1 (8.7 to 33.6)     | 37 (21 to 61)          | 0.6 (0.3 to 0.9)     | 229<br>(144 to 361)       | 3.3 (2.2 to 4.9)        | 30 (17 to 49)          | 0.5 (0.3 to 0.8)    | 930<br>(510 to 1578)       | 12.1 (7.1 to 19.4)      | 23 (12 to 39)                      | 0.3 (0.2 to 0.6)    | 953<br>(526 to 1615)                   | 12.4 (7.4 to 19.9)      |
| Albania        | Both   | 226<br>(206 to 248)    | 9.5 (8.7 to 10.4)   | 2475<br>(2198 to 2777)    | 109.6 (96.2 to 125.1)  | 113<br>(104 to 123)    | 5.1 (4.7 to 5.6)    | 3639<br>(3351 to 3966)    | 148.5 (136.8 to 161.5) | 165<br>(113 to 230)                | 7.1 (4.8 to 9.8)    | 3804<br>(3499 to 4148)                 | 155.5 (143 to 169)     | 764<br>(555 to 1031)   | 20.7 (15.1 to 28)    | 7725<br>(6119 to 9889)    | 204.6 (160.1 to 264.8)  | 258<br>(190 to 343)    | 6.5 (4.8 to 8.7)    | 6838<br>(5042 to 9255)     | 185 (136.3 to 251.4)    | 540<br>(334 to 813)                | 14.6 (8.9 to 22.2)  | 7379<br>(5418 to 9965)                 | 199.6 (145.6 to 271.4)  |
|                | Female | 221<br>(201 to 243)    | 18.8 (17.1 to 20.7) | 2431<br>(2156 to 2730)    | 213.1 (187.7 to 241.7) | 110<br>(101 to 120)    | 9.7 (8.9 to 10.6)   | 3562<br>(3273 to 3887)    | 297.9 (274.5 to 325.2) | 162<br>(110 to 225)                | 13.8 (9.4 to 19.2)  | 3724<br>(3423 to 4063)                 | 311.7 (285.9 to 340.4) | 743<br>(541 to 1004)   | 39 (28.3 to 52.7)    | 7554<br>(5984 to 9677)    | 386.9 (302.3 to 501.5)  | 249<br>(184 to 332)    | 11.9 (8.8 to 16)    | 6648<br>(4891 to 8996)     | 348.1 (256.3 to 474.2)  | 524<br>(323 to 789)                | 27.4 (16.7 to 41.6) | 7172<br>(5262 to 9714)                 | 375.5 (273.6 to 512.8)  |
|                | Male   | 5 (4 to 6)             | 0.5 (0.4 to 0.6)    | 44 (37 to 51)             | 4.2 (3.6 to 5)         | 3 (3 to 3)             | 0.3 (0.3 to 0.4)    | 77 (68 to 87)             | 7.1 (6.3 to 8.1)       | 4 (3 to 5)                         | 0.4 (0.3 to 0.5)    | 81 (71 to 92)                          | 7.5 (6.6 to 8.5)       | 21 (14 to 30)          | 1.1 (0.8 to 1.6)     | 172<br>(122 to 235)       | 8.9 (6.3 to 12.3)       | 9 (6 to 12)            | 0.5 (0.3 to 0.6)    | 191<br>(133 to 262)        | 10.1 (7.1 to 13.8)      | 16 (10 to 25)                      | 0.8 (0.5 to 1.3)    | 207<br>(144 to 282)                    | 11 (7.7 to 14.8)        |
| Algeria        | Both   | 1721<br>(1354 to 2167) | 13.1 (10.5 to 16.3) | 15452<br>(12685 to 18675) | 113.5 (94.2 to 135)    | 981<br>(786 to 1221)   | 8.5 (6.9 to 10.3)   | 32219<br>(25422 to 40625) | 232.2 (185.5 to 288.9) | 1138<br>(740 to 1655)              | 8.4 (5.6 to 12)     | 33357<br>(26362 to 41954)              | 240.6 (192.6 to 299.6) | 7052<br>(5307 to 8987) | 18.1 (13.8 to 22.7)  | 63585<br>(49824 to 79009) | 162.6 (129.7 to 199.5)  | 2662<br>(2013 to 3352) | 7.6 (5.8 to 9.5)    | 84425<br>(62833 to 108274) | 212.4 (159.8 to 269.9)  | 4730<br>(3071 to 6885)             | 12 (7.9 to 17.3)    | 89155<br>(67273 to 114020)             | 224.4 (170.3 to 285.4)  |
|                | Female | 1526<br>(1186 to 1937) | 22.1 (17.5 to 27.9) | 14307<br>(11660 to 17462) | 206.6 (171 to 249.7)   | 829<br>(657 to 1045)   | 13.2 (10.8 to 16.4) | 28701<br>(22421 to 36735) | 396.8 (311.9 to 505)   | 1024<br>(669 to 1513)              | 14.6 (9.6 to 21.2)  | 29725<br>(23246 to 37929)              | 411.4 (324.4 to 522.1) | 6621<br>(4954 to 8490) | 34 (25.6 to 43.3)    | 60497<br>(47142 to 75557) | 311.4 (248.2 to 384.3)  | 2407<br>(1823 to 3047) | 13.9 (10.7 to 17.3) | 78779<br>(58625 to 101604) | 396.6 (296.9 to 507)    | 4445<br>(2884 to 6539)             | 22.6 (14.8 to 32.8) | 83225<br>(62174 to 107206)             | 419.3 (315.9 to 537.8)  |
|                | Male   | 195<br>(138 to 262)    | 4 (2.9 to 5.4)      | 1145<br>(841 to 1520)     | 19.9 (14.8 to 26.3)    | 152<br>(108 to 203)    | 3.6 (2.6 to 4.9)    | 3518<br>(2552 to 4770)    | 63.4 (45.4 to 84)      | 114 (69 to 172)                    | 2.1 (1.3 to 3.1)    | 3632<br>(2629 to 4926)                 | 65.5 (46.8 to 86.8)    | 430<br>(272 to 630)    | 2.7 (1.7 to 3.8)     | 3088<br>(2045 to 4388)    | 18.1 (12.2 to 25.6)     | 254<br>(166 to 364)    | 1.7 (1.1 to 2.5)    | 5646<br>(3677 to 7999)     | 32.9 (21.4 to 46.4)     | 285<br>(164 to 441)                | 1.7 (1 to 2.6)      | 5931<br>(3858 to 8439)                 | 34.6 (22.5 to 48.9)     |
| American Samoa | Both   | 4 (3 to 6)             | 16.8 (12.9 to 20.4) | 39 (31 to 46)             | 142.5 (115.6 to 168.5) | 3 (2 to 3)             | 11.5 (8.8 to 13.9)  | 84 (63 to 105)            | 296.6 (225.9 to 364.7) | 3 (2 to 4)                         | 10.3 (6.8 to 14.3)  | 87 (66 to 108)                         | 306.8 (234.4 to 375.6) | 14 (11 to 18)          | 29 (23.1 to 36.4)    | 118 (97 to 144)           | 230.7 (190.6 to 280.8)  | 8 (6 to 10)            | 16.8 (13.5 to 20.7) | 225<br>(178 to 284)        | 441.4 (350.1 to 552.4)  | 9 (6 to 12)                        | 17.5 (11.9 to 24.1) | 234<br>(185 to 294)                    | 458.9 (364 to 575.2)    |
|                | Female | 4 (3 to 5)             | 34 (26 to 41.5)     | 38 (31 to 46)             | 289.9 (235 to 343.3)   | 3 (2 to 3)             | 22.8 (17.4 to 27.5) | 84 (63 to 104)            | 607.2 (461.1 to 750.2) | 3 (2 to 4)                         | 20.9 (13.8 to 29.3) | 86 (65 to 108)                         | 628.1 (478.7 to 772.3) | 14 (11 to 18)          | 56 (44.3 to 70.3)    | 117 (96 to 144)           | 448.3 (369.3 to 546.8)  | 8 (6 to 10)            | 31.8 (25.5 to 39.3) | 224<br>(177 to 283)        | 856.9 (677.8 to 1074.2) | 9 (6 to 12)                        | 34 (22.9 to 46.9)   | 233<br>(184 to 293)                    | 890.8 (704.6 to 1117.5) |
|                | Male   | 0 (0 to 0)             | 0.2 (0.1 to 0.2)    | 0 (0 to 0)                | 1.3 (1 to 1.7)         | 0 (0 to 0)             | 0.1 (0.1 to 0.2)    | 0 (0 to 1)                | 2.8 (1.9 to 4)         | 0 (0 to 0)                         | 0.1 (0.1 to 0.2)    | 0 (0 to 1)                             | 2.9 (2 to 4.1)         | 0 (0 to 0)             | 0.3 (0.2 to 0.4)     | 0 (0 to 1)                | 2 (1.5 to 2.5)          | 0 (0 to 0)             | 0.2 (0.1 to 0.3)    | 1 (1 to 1)                 | 4.3 (3.1 to 5.7)        | 0 (0 to 0)                         | 0.2 (0.1 to 0.3)    | 1 (1 to 1)                             | 4.4 (3.3 to 5.9)        |
| Andorra        | Both   | 18 (13 to 25)          | 31.2 (23.1 to 42.9) | 201<br>(159 to 257)       | 350.7 (278.3 to 446.9) | 5 (4 to 8)             | 10.4 (7.8 to 14.2)  | 150<br>(111 to 206)       | 257.9 (190.8 to 354.7) | 14 (9 to 21)                       | 24.2 (15.4 to 35.8) | 164<br>(121 to 225)                    | 282.1 (209.1 to 386.8) | 55 (39 to 74)          | 40.5 (28.7 to 54.1)  | 610<br>(480 to 764)       | 444.8 (348.4 to 558)    | 13 (9 to 17)           | 9 (6.5 to 12)       | 306<br>(221 to 413)        | 223.2 (161.8 to 300.8)  | 42 (27 to 63)                      | 31.2 (19.5 to 46.4) | 348<br>(250 to 473)                    | 254.5 (183.1 to 345.1)  |
|                | Female | 17 (13 to 24)          | 62.8 (46.2 to 86.8) | 196<br>(155 to 251)       | 709.4 (563.2 to 908.4) | 5 (4 to 7)             | 20 (14.8 to 27.6)   | 145<br>(106 to 199)       | 520.8 (384.6 to 716)   | 14 (9 to 20)                       | 48.7 (30.9 to 73)   | 158<br>(116 to 217)                    | 569.5 (420 to 785)     | 54 (38 to 72)          | 80.6 (56.7 to 107.9) | 595<br>(467 to 746)       | 890.8 (689.5 to 1119.7) | 13 (9 to 17)           | 17.3 (12.4 to 23.1) | 296<br>(213 to 399)        | 443.1 (318.4 to 599.5)  | 41 (26 to 61)                      | 62.2 (38.6 to 92.3) | 337<br>(241 to 456)                    | 505.4 (361.6 to 687.1)  |
|                | Male   | 1 (0 to 1)             | 2.2 (1.4 to 3.3)    | 5 (3 to 7)                | 17.8 (12.2 to 25.1)    | 0 (0 to 0)             | 0.9 (0.6 to 1.4)    | 5 (4 to 8)                | 18.9 (12.6 to 27.8)    | 0 (0 to 1)                         | 1.7 (1 to 2.7)      | 6 (4 to 9)                             | 20.5 (13.7 to 30.5)    | 2 (1 to 2)             | 2.4 (1.7 to 3.4)     | 15 (11 to 20)             | 21.4 (15.8 to 28.8)     | 1 (0 to 1)             | 0.7 (0.5 to 1)      | 10 (7 to 14)               | 14.5 (10.2 to 20)       | 1 (1 to 2)                         | 1.9 (1.1 to 2.9)    | 11 (8 to 16)                           | 16.4 (11.5 to 22.5)     |

|                     |        | 1990                   |                        |                           |                           |                        |                        |                              |                           |                                    |                        |                                        |                            | 2019                      |                         |                              |                            |                        |                        |                              |                           |                                    |                        |                                        |                           |
|---------------------|--------|------------------------|------------------------|---------------------------|---------------------------|------------------------|------------------------|------------------------------|---------------------------|------------------------------------|------------------------|----------------------------------------|----------------------------|---------------------------|-------------------------|------------------------------|----------------------------|------------------------|------------------------|------------------------------|---------------------------|------------------------------------|------------------------|----------------------------------------|---------------------------|
|                     |        | Incidence              |                        | Prevalence                |                           | Deaths                 |                        | YLLs (Years of Life Lost)    |                           | YLDs (Years Lived with Disability) |                        | DALYs (Disability-Adjusted Life Years) |                            | Incidence                 |                         | Prevalence                   |                            | Deaths                 |                        | YLLs (Years of Life Lost)    |                           | YLDs (Years Lived with Disability) |                        | DALYs (Disability-Adjusted Life Years) |                           |
| Location            | Sex    | Number                 | Rate                   | Number                    | Rate                      | Number                 | Rate                   | Number                       | Rate                      | Number                             | Rate                   | Number                                 | Rate                       | Number                    | Rate                    | Number                       | Rate                       | Number                 | Rate                   | Number                       | Rate                      | Number                             | Rate                   | Number                                 | Rate                      |
| Angola              | Both   | 396<br>(274 to 530)    | 8.5 (5.9 to 11.2)      | 2576<br>(1916 to 3310)    | 54.3 (42 to 67.8)         | 319<br>(225 to 431)    | 7.4 (5.4 to 9.8)       | 11145<br>(7739 to 15386)     | 211.2<br>(148.9 to 286.2) | 221<br>(137 to 325)                | 4.6 (2.9 to 6.7)       | 11366<br>(7919 to 15669)               | 215.8<br>(152.7 to 291.6)  | 1978<br>(1408 to 2660)    | 14.9<br>(11.1 to 19.7)  | 13491<br>(9883 to 17787)     | 95.3<br>(72.9 to 122.5)    | 1338<br>(967 to 1790)  | 11.5<br>(8.8 to 15)    | 44861<br>(31503 to 60996)    | 302<br>(219.1 to 403.5)   | 1136<br>(696 to 1727)              | 8.1 (5.3 to 12.1)      | 45997<br>(32317 to 62266)              | 310.1<br>(224.2 to 414.8) |
|                     | Female | 383<br>(263 to 520)    | 16.2<br>(11.1 to 21.6) | 2508<br>(1861 to 3250)    | 104.9<br>(80.8 to 131.2)  | 308<br>(214 to 417)    | 14 (9.9 to 18.6)       | 10793<br>(7407 to 14884)     | 410.2<br>(285.4 to 559.1) | 213<br>(132 to 316)                | 8.8 (5.6 to 12.9)      | 11007<br>(7571 to 15180)               | 419<br>(292.5 to 570.5)    | 1940<br>(1376 to 2621)    | 26.4<br>(19.5 to 35.2)  | 13269<br>(9675 to 17539)     | 171.6<br>(129.8 to 222.7)  | 1308<br>(944 to 1762)  | 20 (15 to 26.3)        | 43962<br>(30889 to 59899)    | 543.6<br>(391.9 to 733)   | 1113<br>(678 to 1689)              | 14.5<br>(9.3 to 21.7)  | 45075<br>(31524 to 61099)              | 558.1<br>(402.5 to 751.5) |
|                     | Male   | 13 (8 to 20)           | 0.6 (0.4 to 0.9)       | 68 (44 to 100)            | 3.2 (2.2 to 4.5)          | 11 (7 to 18)           | 0.6 (0.4 to 0.9)       | 352<br>(210 to 555)          | 15.2<br>(9.2 to 23.4)     | 8 (4 to 12)                        | 0.4 (0.2 to 0.6)       | 359<br>(215 to 566)                    | 15.6<br>(9.4 to 23.9)      | 37 (24 to 55)             | 0.7 (0.5 to 1)          | 221<br>(148 to 321)          | 3.9 (2.7 to 5.4)           | 30 (19 to 43)          | 0.6 (0.4 to 0.9)       | 899<br>(569 to 1381)         | 14.8<br>(9.5 to 21.5)     | 23 (13 to 38)                      | 0.4 (0.3 to 0.7)       | 923<br>(583 to 1418)                   | 15.2<br>(9.8 to 22.1)     |
| Antigua and Barbuda | Both   | 14 (13 to 16)          | 28.2<br>(24.8 to 31.9) | 119<br>(106 to 133)       | 233.7<br>(207.7 to 262.1) | 7 (6 to 8)             | 13.4<br>(11.9 to 15)   | 180<br>(160 to 203)          | 357.7<br>(318.8 to 403.8) | 9 (6 to 11)                        | 16.8<br>(11.8 to 22.6) | 188<br>(168 to 212)                    | 374.4<br>(333.7 to 422.8)  | 45 (38 to 54)             | 42.8<br>(36.4 to 50.3)  | 373<br>(317 to 439)          | 347.8<br>(297.5 to 407.9)  | 16 (14 to 19)          | 16.4<br>(14.3 to 18.9) | 435<br>(368 to 515)          | 404.8<br>(344.2 to 476.7) | 27 (19 to 37)                      | 25.3<br>(17.7 to 34.6) | 462<br>(391 to 547)                    | 430.1<br>(366.2 to 506.4) |
|                     | Female | 14 (13 to 16)          | 51 (44.6 to 57.8)      | 118<br>(105 to 132)       | 425.9<br>(377.7 to 479.5) | 7 (6 to 8)             | 23.2<br>(20.7 to 26.2) | 177<br>(158 to 200)          | 651.9<br>(578.4 to 737.2) | 8 (6 to 11)                        | 30.4<br>(21.2 to 41)   | 186<br>(166 to 209)                    | 682.3<br>(606.8 to 774.1)  | 45 (38 to 53)             | 80.4<br>(68.3 to 94.9)  | 371<br>(315 to 437)          | 658.1<br>(561.9 to 773)    | 16 (14 to 19)          | 30.2<br>(26.1 to 34.8) | 431<br>(364 to 511)          | 761.5<br>(645.6 to 897.8) | 27 (18 to 37)                      | 47.7<br>(33.2 to 65.3) | 458<br>(387 to 542)                    | 809.2<br>(688.3 to 952.9) |
|                     | Male   | 0 (0 to 0)             | 0.7 (0.6 to 0.9)       | 1 (1 to 1)                | 4.2 (3.5 to 5.1)          | 0 (0 to 0)             | 0.5 (0.5 to 0.7)       | 2 (2 to 3)                   | 11.1<br>(9.3 to 13.2)     | 0 (0 to 0)                         | 0.4 (0.3 to 0.6)       | 3 (2 to 3)                             | 11.5<br>(9.7 to 13.7)      | 0 (0 to 0)                | 0.7 (0.5 to 0.9)        | 2 (2 to 3)                   | 4.3 (3.3 to 5.5)           | 0 (0 to 0)             | 0.4 (0.3 to 0.6)       | 4 (3 to 5)                   | 8.3 (6.5 to 10.6)         | 0 (0 to 0)                         | 0.4 (0.3 to 0.6)       | 4 (3 to 5)                             | 8.8 (6.8 to 11.1)         |
| Argentina           | Both   | 8956<br>(8549 to 9406) | 28 (26.7 to 29.3)      | 80528<br>(73833 to 88830) | 250.7<br>(229.6 to 276.7) | 5473<br>(5243 to 5698) | 17.4<br>(16.6 to 18.1) | 144076<br>(139103 to 149395) | 447.6<br>(431.7 to 464.2) | 5976<br>(4227 to 8130)             | 18.6<br>(13.1 to 25.3) | 150052<br>(144620 to 155832)           | 466.2<br>(449.4 to 483.9)  | 17868<br>(13834 to 22719) | 34.3<br>(26.5 to 43.7)  | 165358<br>(136541 to 200357) | 316.8<br>(260.4 to 385.6)  | 8476<br>(7818 to 9135) | 15.8<br>(14.6 to 17.1) | 197317<br>(184161 to 210825) | 382.5<br>(356.5 to 408.6) | 12336<br>(8264 to 17751)           | 23.7<br>(15.9 to 34.2) | 209653<br>(194978 to 225664)           | 406.2<br>(377.1 to 437.3) |
|                     | Female | 8879<br>(8475 to 9329) | 51 (48.7 to 53.5)      | 79995<br>(73287 to 88299) | 457.9<br>(420.4 to 503.7) | 5416<br>(5187 to 5643) | 30.9<br>(29.6 to 32.2) | 142766<br>(137833 to 148109) | 828.7<br>(799.4 to 859.8) | 5922<br>(4187 to 8062)             | 34 (24 to 46.3)        | 148688<br>(143323 to 154524)           | 862.7<br>(831.1 to 895.8)  | 17745<br>(13747 to 22569) | 62.7<br>(48.4 to 80.3)  | 164398<br>(135787 to 199062) | 580.8<br>(475.8 to 709.2)  | 8403<br>(7742 to 9066) | 27.9<br>(25.8 to 30)   | 195718<br>(182508 to 209212) | 705.5<br>(657.4 to 753.6) | 12243<br>(8208 to 17627)           | 43.5<br>(29.1 to 62.7) | 207961<br>(193317 to 223994)           | 749<br>(694.5 to 808.1)   |
|                     | Male   | 78 (68 to 88)          | 0.6 (0.5 to 0.6)       | 533<br>(460 to 617)       | 3.8 (3.3 to 4.3)          | 57 (50 to 64)          | 0.4 (0.4 to 0.5)       | 1310<br>(1165 to 1465)       | 9.1 (8.1 to 10.2)         | 55 (37 to 76)                      | 0.4 (0.3 to 0.5)       | 1364<br>(1213 to 1523)                 | 9.5 (8.5 to 10.6)          | 123 (88 to 165)           | 0.5 (0.4 to 0.7)        | 961<br>(727 to 1251)         | 4.1 (3.1 to 5.3)           | 73 (60 to 89)          | 0.3 (0.3 to 0.4)       | 1599<br>(1342 to 1903)       | 6.8 (5.7 to 8.1)          | 93 (59 to 140)                     | 0.4 (0.3 to 0.6)       | 1692<br>(1420 to 2021)                 | 7.2 (6 to 8.6)            |
| Armenia             | Both   | 926<br>(865 to 991)    | 31.4<br>(29.5 to 33.6) | 7956<br>(7342 to 8700)    | 272.3<br>(251 to 297.8)   | 470<br>(444 to 497)    | 16.6<br>(15.6 to 17.5) | 15122<br>(14233 to 16057)    | 501.6<br>(473.1 to 530)   | 597<br>(418 to 805)                | 20.3<br>(14.2 to 27.3) | 15719<br>(14739 to 16683)              | 521.8<br>(491.8 to 551.8)  | 1363<br>(1116 to 1641)    | 34.2<br>(27.9 to 41.2)  | 13254<br>(11316 to 15408)    | 329.4<br>(280.1 to 383.6)  | 558<br>(465 to 662)    | 13.8<br>(11.4 to 16.4) | 14712<br>(12172 to 17746)    | 369.2<br>(303.6 to 446.1) | 934<br>(632 to 1291)               | 23.4<br>(15.8 to 32.3) | 15646<br>(12961 to 18825)              | 392.6<br>(321.8 to 472.4) |
|                     | Female | 926<br>(864 to 990)    | 57.5<br>(53.8 to 61.4) | 7947<br>(7333 to 8690)    | 495.4<br>(458.5 to 541.7) | 470<br>(443 to 497)    | 29.6 (28 to 31.3)      | 15108<br>(14218 to 16045)    | 926.8<br>(874.1 to 981.5) | 596<br>(417 to 804)                | 37 (25.9 to 50.1)      | 15704<br>(14724 to 16668)              | 963.8<br>(907.6 to 1021.5) | 1350<br>(1105 to 1627)    | 61.2<br>(49.8 to 73.7)  | 13163<br>(11223 to 15288)    | 589.6<br>(499.9 to 686.9)  | 552<br>(459 to 654)    | 23.9<br>(19.9 to 28.5) | 14566<br>(12035 to 17578)    | 662.6<br>(543.4 to 802.5) | 925<br>(625 to 1280)               | 41.8<br>(28.2 to 57.8) | 15491<br>(12803 to 18634)              | 704.5<br>(576.7 to 849.3) |
|                     | Male   | 1 (1 to 1)             | 0.1 (0.1 to 0.1)       | 9 (7 to 11)               | 0.7 (0.6 to 0.8)          | 0 (0 to 1)             | 0 (0 to 0)             | 14 (13 to 16)                | 1.1 (0.9 to 1.2)          | 1 (0 to 1)                         | 0.1 (0 to 0.1)         | 15 (14 to 17)                          | 1.1 (1 to 1.2)             | 13 (10 to 17)             | 0.7 (0.6 to 0.9)        | 91 (68 to 118)               | 5.1 (3.9 to 6.6)           | 6 (5 to 8)             | 0.4 (0.3 to 0.4)       | 146<br>(115 to 178)          | 8.2 (6.5 to 9.9)          | 9 (6 to 14)                        | 0.5 (0.3 to 0.8)       | 155<br>(122 to 191)                    | 8.7 (6.9 to 10.6)         |
| Australia           | Both   | 7976<br>(7587 to 8331) | 42.1<br>(40.1 to 44)   | 87961<br>(80900 to 97287) | 461.2<br>(426 to 508.6)   | 2605<br>(2471 to 2701) | 13.8<br>(13.1 to 14.4) | 67637<br>(65366 to 69715)    | 360.8<br>(348.4 to 372)   | 6113<br>(4247 to 8339)             | 32.1<br>(22.3 to 43.9) | 73750<br>(70513 to 76985)              | 392.9<br>(375.9 to 409.8)  | 15656<br>(12089 to 20129) | 42.6<br>(32.9 to 55.1)  | 176676<br>(147339 to 213221) | 468.9<br>(388.1 to 571.8)  | 3711<br>(3324 to 4031) | 9.1 (8.3 to 9.9)       | 80925<br>(74741 to 86669)    | 223.9<br>(207.7 to 239.3) | 12080<br>(8010 to 17498)           | 32.7<br>(21.5 to 47.6) | 93004<br>(85086 to 102208)             | 256.5<br>(235.5 to 281.6) |
|                     | Female | 7932<br>(7545 to 8284) | 79.7<br>(75.9 to 83.3) | 87548<br>(80530 to 96823) | 864.7<br>(800.1 to 949)   | 2593<br>(2459 to 2690) | 25.3<br>(24.1 to 26.2) | 67362<br>(65090 to 69433)    | 695.4<br>(671.8 to 717.1) | 6075<br>(4213 to 8294)             | 60.6<br>(41.9 to 82.7) | 73436<br>(70207 to 76662)              | 756<br>(723.8 to 788.3)    | 15545<br>(12011 to 20007) | 81.5<br>(62.8 to 105.5) | 175627<br>(146353 to 211663) | 896.1<br>(740.6 to 1095.4) | 3687<br>(3306 to 4008) | 17.1<br>(15.6 to 18.4) | 80436<br>(74321 to 86180)    | 429.7<br>(398.8 to 459.6) | 11986<br>(7946 to 17362)           | 62.5<br>(40.9 to 91.1) | 92423<br>(84549 to 101565)             | 492.1<br>(451.7 to 540.6) |
|                     | Male   | 45 (37 to 53)          | 0.5 (0.4 to 0.6)       | 413<br>(349 to 485)       | 4.7 (4 to 5.5)            | 12 (10 to 13)          | 0.1 (0.1 to 0.2)       | 275<br>(244 to 308)          | 3.1 (2.8 to 3.5)          | 38 (26 to 54)                      | 0.4 (0.3 to 0.6)       | 314<br>(277 to 354)                    | 3.6 (3.1 to 4)             | 110 (78 to 150)           | 0.6 (0.4 to 0.8)        | 1049<br>(788 to 1395)        | 5.9 (4.4 to 7.8)           | 24 (19 to 30)          | 0.1 (0.1 to 0.2)       | 488<br>(405 to 590)          | 2.7 (2.3 to 3.3)          | 93 (59 to 143)                     | 0.5 (0.3 to 0.8)       | 581<br>(477 to 718)                    | 3.3 (2.7 to 4)            |

|            |        | 1990                   |                        |                           |                           |                        |                        |                             |                             |                                    |                        |                                        |                             | 2019                      |                         |                              |                           |                         |                        |                              |                             |                                    |                        |                                        |                           |
|------------|--------|------------------------|------------------------|---------------------------|---------------------------|------------------------|------------------------|-----------------------------|-----------------------------|------------------------------------|------------------------|----------------------------------------|-----------------------------|---------------------------|-------------------------|------------------------------|---------------------------|-------------------------|------------------------|------------------------------|-----------------------------|------------------------------------|------------------------|----------------------------------------|---------------------------|
|            |        | Incidence              |                        | Prevalence                |                           | Deaths                 |                        | YLLs (Years of Life Lost)   |                             | YLDs (Years Lived with Disability) |                        | DALYs (Disability-Adjusted Life Years) |                             | Incidence                 |                         | Prevalence                   |                           | Deaths                  |                        | YLLs (Years of Life Lost)    |                             | YLDs (Years Lived with Disability) |                        | DALYs (Disability-Adjusted Life Years) |                           |
| Location   | Sex    | Number                 | Rate                   | Number                    | Rate                      | Number                 | Rate                   | Number                      | Rate                        | Number                             | Rate                   | Number                                 | Rate                        | Number                    | Rate                    | Number                       | Rate                      | Number                  | Rate                   | Number                       | Rate                        | Number                             | Rate                   | Number                                 | Rate                      |
| Austria    | Both   | 4589<br>(4283 to 4898) | 43.3<br>(40.5 to 46.2) | 50498<br>(45674 to 56180) | 466.2<br>(424.4 to 513.2) | 1709<br>(1611 to 1778) | 15.2<br>(14.3 to 15.7) | 39826<br>(38130 to 41218)   | 381.9<br>(366.7 to 395.3)   | 3491<br>(2442 to 4756)             | 32.7<br>(22.7 to 44.8) | 43317<br>(41295 to 45264)              | 414.6<br>(395.2 to 433.5)   | 5698<br>(4584 to 6999)    | 37.1<br>(29.8 to 45.6)  | 63235<br>(54588 to 74020)    | 403.2<br>(344.3 to 474.9) | 1776<br>(1598 to 1927)  | 9.8 (9 to 10.6)        | 34292<br>(31626 to 36768)    | 222.6<br>(207 to 238.2)     | 4339<br>(2961 to 6062)             | 28.2 (19 to 40)        | 38632<br>(35426 to 41911)              | 250.8<br>(230.5 to 271.3) |
|            | Female | 4565<br>(4259 to 4876) | 77.9<br>(72.5 to 83.3) | 50269<br>(45443 to 55905) | 824.4<br>(753.7 to 904.8) | 1698<br>(1600 to 1768) | 25.6<br>(24.3 to 26.6) | 39591<br>(37883 to 40980)   | 692<br>(664.9 to 717.5)     | 3471<br>(2428 to 4730)             | 58.4<br>(40.5 to 80.1) | 43062<br>(41053 to 44992)              | 750.4<br>(716.1 to 785.5)   | 5635<br>(4529 to 6920)    | 69.9<br>(55.9 to 86.1)  | 62651<br>(54108 to 73392)    | 758.2<br>(644.4 to 893.4) | 1755<br>(1578 to 1909)  | 17.6<br>(16.1 to 18.9) | 33901<br>(31272 to 36374)    | 419.2<br>(390.1 to 448.8)   | 4286<br>(2930 to 5992)             | 53.1<br>(35.6 to 75.6) | 38187<br>(35017 to 41385)              | 472.3<br>(433.1 to 512.2) |
|            | Male   | 24 (20 to 29)          | 0.5 (0.5 to 0.7)       | 229<br>(192 to 272)       | 5.2 (4.3 to 6.1)          | 11 (9 to 12)           | 0.2 (0.2 to 0.3)       | 235<br>(204 to 268)         | 5.2 (4.6 to 6)              | 20 (13 to 29)                      | 0.5 (0.3 to 0.6)       | 255<br>(223 to 292)                    | 5.7 (5 to 6.5)              | 63 (46 to 85)             | 0.8 (0.6 to 1.1)        | 584<br>(450 to 752)          | 7.7 (6 to 9.9)            | 21 (17 to 26)           | 0.3 (0.2 to 0.3)       | 392<br>(324 to 477)          | 5.3 (4.4 to 6.3)            | 53 (33 to 78)                      | 0.7 (0.4 to 1)         | 445<br>(366 to 545)                    | 6 (5 to 7.3)              |
| Azerbaijan | Both   | 952<br>(859 to 1056)   | 17.5<br>(15.9 to 19.5) | 8357<br>(7492 to 9324)    | 156.3<br>(140.3 to 174.5) | 548<br>(496 to 605)    | 10.5<br>(9.5 to 11.6)  | 17952<br>(16217 to 19788)   | 321.4<br>(290.7 to 355)     | 616<br>(419 to 861)                | 11.4<br>(7.7 to 15.7)  | 18569<br>(16765 to 20623)              | 332.8<br>(301 to 367.8)     | 2300<br>(1834 to 2862)    | 20.8<br>(16.6 to 25.7)  | 20125<br>(16619 to 24203)    | 181.4<br>(151.6 to 215.3) | 993<br>(792 to 1234)    | 9.8 (7.9 to 12.1)      | 32022<br>(25323 to 39961)    | 281.5<br>(224.6 to 348)     | 1510<br>(1001 to 2182)             | 13.5<br>(9.2 to 19.3)  | 33531<br>(26534 to 41824)              | 295.1<br>(235.9 to 364.2) |
|            | Female | 951<br>(857 to 1054)   | 31.6<br>(28.4 to 35)   | 8342<br>(7475 to 9311)    | 277.6<br>(249.8 to 309.4) | 547<br>(495 to 604)    | 18.3<br>(16.6 to 20.2) | 17924<br>(16191 to 19761)   | 587.1<br>(531.8 to 648.4)   | 615<br>(418 to 859)                | 20.4<br>(13.8 to 28.3) | 18539<br>(16736 to 20593)              | 607.4<br>(548.6 to 671.7)   | 2287<br>(1823 to 2841)    | 38.5<br>(30.7 to 47.6)  | 20025<br>(16496 to 24108)    | 336.6<br>(280 to 401.1)   | 986<br>(785 to 1225)    | 17.8<br>(14.2 to 22)   | 31825<br>(25101 to 39773)    | 525.1<br>(418 to 649.6)     | 1500<br>(994 to 2169)              | 25.2 (17 to 35.8)      | 33325<br>(26340 to 41639)              | 550.2<br>(438.6 to 682.2) |
|            | Male   | 1 (1 to 2)             | 0.1 (0 to 0.1)         | 15 (12 to 19)             | 0.6 (0.5 to 0.8)          | 1 (1 to 1)             | 0 (0 to 0)             | 28 (24 to 34)               | 1.1 (0.9 to 1.3)            | 1 (1 to 2)                         | 0 (0 to 0.1)           | 29 (25 to 35)                          | 1.1 (0.9 to 1.3)            | 13 (8 to 20)              | 0.3 (0.2 to 0.4)        | 100 (63 to 149)              | 2.1 (1.4 to 3.1)          | 7 (4 to 10)             | 0.2 (0.1 to 0.2)       | 197<br>(120 to 294)          | 4.1 (2.6 to 5.9)            | 10 (5 to 16)                       | 0.2 (0.1 to 0.3)       | 207<br>(127 to 308)                    | 4.3 (2.8 to 6.2)          |
| Bahamas    | Both   | 75 (67 to 84)          | 42.3<br>(37.9 to 47.4) | 598<br>(532 to 668)       | 335.2<br>(298.8 to 373.8) | 33 (30 to 37)          | 20.2<br>(18.2 to 22.4) | 1071<br>(954 to 1195)       | 579.6<br>(516.6 to 643.9)   | 44 (30 to 60)                      | 24.8<br>(17.1 to 33.6) | 1116<br>(997 to 1251)                  | 604.5<br>(540 to 676.4)     | 211<br>(169 to 263)       | 49.9<br>(40.2 to 62)    | 1760<br>(1444 to 2175)       | 414.2<br>(342 to 507.2)   | 80 (65 to 99)           | 20 (16.4 to 24.6)      | 2397<br>(1921 to 3008)       | 556.7<br>(448.7 to 698.4)   | 127 (84 to 182)                    | 30 (20 to 42.5)        | 2524<br>(2015 to 3160)                 | 586.7<br>(473.2 to 732.6) |
|            | Female | 74 (66 to 83)          | 77 (68.8 to 86.4)      | 594<br>(529 to 664)       | 614<br>(547.4 to 686.8)   | 33 (29 to 36)          | 35.6 (32 to 39.4)      | 1059<br>(942 to 1182)       | 1064.5<br>(945.3 to 1186.9) | 44 (30 to 60)                      | 45.3<br>(31.2 to 61.5) | 1103<br>(984 to 1237)                  | 1109.8<br>(988.5 to 1243.3) | 209<br>(167 to 261)       | 92.1<br>(74.1 to 114.9) | 1749<br>(1434 to 2161)       | 768.4<br>(633.3 to 942.6) | 79 (65 to 97)           | 35.9<br>(29.5 to 44.4) | 2370<br>(1898 to 2974)       | 1031.7<br>(829.7 to 1294.7) | 126 (83 to 180)                    | 55.5<br>(36.9 to 78.7) | 2496<br>(1991 to 3131)                 | 1087.2<br>(874 to 1359.3) |
|            | Male   | 1 (1 to 1)             | 1 (0.9 to 1.2)         | 4 (4 to 5)                | 6 (5.1 to 7.1)            | 0 (0 to 1)             | 0.8 (0.7 to 0.9)       | 13 (11 to 14)               | 17.4<br>(15.1 to 19.8)      | 0 (0 to 1)                         | 0.6 (0.4 to 0.9)       | 13 (11 to 15)                          | 18 (15.6 to 20.5)           | 2 (1 to 2)                | 1 (0.8 to 1.2)          | 11 (9 to 15)                 | 6.2 (4.9 to 7.9)          | 1 (1 to 1)              | 0.7 (0.5 to 0.8)       | 27 (21 to 34)                | 14.3<br>(11.3 to 18.1)      | 1 (1 to 2)                         | 0.6 (0.4 to 0.9)       | 28 (21 to 36)                          | 15 (11.8 to 18.9)         |
| Bahrain    | Both   | 47 (39 to 56)          | 19.8<br>(16.9 to 23.2) | 390<br>(331 to 456)       | 160.8<br>(139.2 to 186.8) | 25 (21 to 29)          | 12.5<br>(10.7 to 14.4) | 834<br>(702 to 984)         | 320.9<br>(272.8 to 376.7)   | 30 (20 to 42)                      | 12.1<br>(8.5 to 16.6)  | 864<br>(725 to 1018)                   | 333<br>(283.4 to 390.3)     | 349<br>(273 to 437)       | 26.2<br>(21.1 to 31.9)  | 3115<br>(2527 to 3807)       | 226<br>(190.3 to 268.4)   | 104 (83 to 128)         | 10.6<br>(8.7 to 12.8)  | 3393<br>(2700 to 4225)       | 236.6<br>(190.1 to 289.1)   | 231<br>(153 to 334)                | 16.8<br>(11.6 to 23.5) | 3625<br>(2883 to 4525)                 | 253.4<br>(203 to 311)     |
|            | Female | 47 (39 to 56)          | 45.8<br>(38.9 to 54)   | 388<br>(329 to 453)       | 373.4<br>(322.9 to 433.4) | 24 (21 to 29)          | 27.4<br>(23.5 to 31.8) | 830<br>(698 to 979)         | 760.4<br>(646.3 to 891.3)   | 30 (20 to 42)                      | 28.2<br>(19.5 to 38.9) | 859<br>(721 to 1013)                   | 788.6<br>(671 to 925.1)     | 346<br>(271 to 433)       | 67.5 (54 to 83.1)       | 3093<br>(2507 to 3783)       | 591.5<br>(492.6 to 708.6) | 103 (82 to 127)         | 25.2<br>(20.4 to 30.5) | 3362<br>(2676 to 4186)       | 624.6<br>(500.5 to 769)     | 229<br>(151 to 331)                | 43.7<br>(29.7 to 61.3) | 3592<br>(2857 to 4487)                 | 668.3<br>(533.3 to 827.7) |
|            | Male   | 0 (0 to 0)             | 0.2 (0.1 to 0.3)       | 2 (2 to 3)                | 1.8 (1.4 to 2.3)          | 0 (0 to 0)             | 0.1 (0.1 to 0.2)       | 4 (3 to 5)                  | 3.2 (2.3 to 4.4)            | 0 (0 to 0)                         | 0.1 (0.1 to 0.2)       | 4 (3 to 6)                             | 3.4 (2.4 to 4.6)            | 3 (2 to 4)                | 0.5 (0.3 to 0.7)        | 23 (16 to 31)                | 3.7 (2.5 to 5.2)          | 1 (1 to 2)              | 0.2 (0.1 to 0.3)       | 31 (20 to 44)                | 4.7 (3 to 6.8)              | 2 (1 to 3)                         | 0.3 (0.2 to 0.6)       | 33 (21 to 47)                          | 5.1 (3.2 to 7.3)          |
| Bangladesh | Both   | 5046<br>(3753 to 6524) | 8.8 (6.7 to 11.3)      | 35026<br>(26969 to 43566) | 61.8 (49 to 75.3)         | 3738<br>(2804 to 4777) | 6.9 (5.3 to 8.7)       | 135128<br>(98142 to 176055) | 223.1<br>(165.9 to 287.5)   | 2881<br>(1802 to 4150)             | 5 (3.2 to 7.1)         | 138009<br>(100436 to 179687)           | 228.1<br>(169.1 to 294.1)   | 17812<br>(13804 to 22827) | 12.5<br>(9.7 to 15.9)   | 140999<br>(113756 to 176102) | 98.6<br>(79.9 to 122.5)   | 9884<br>(7761 to 12395) | 7.2 (5.7 to 9)         | 316977<br>(246020 to 401809) | 218.4<br>(170.3 to 276.4)   | 10903<br>(7258 to 15829)           | 7.6 (5.1 to 11)        | 327880<br>(254782 to 416587)           | 226<br>(176.3 to 286.6)   |
|            | Female | 4952<br>(3670 to 6426) | 18.9<br>(14.3 to 24.2) | 34600<br>(26557 to 43066) | 133.8<br>(105.5 to 163.4) | 3650<br>(2726 to 4693) | 14.7<br>(11.1 to 18.7) | 133070<br>(96464 to 174324) | 477.3<br>(353.7 to 615.7)   | 2829<br>(1762 to 4082)             | 10.6<br>(6.7 to 15.3)  | 135899<br>(98709 to 177807)            | 487.9<br>(360.4 to 630.9)   | 17661<br>(13693 to 22672) | 25 (19.6 to 31.8)       | 140095<br>(113068 to 174878) | 198.2<br>(160.9 to 245)   | 9771<br>(7661 to 12280) | 14.5<br>(11.5 to 18.1) | 314287<br>(243368 to 399058) | 435.1<br>(339.9 to 550.3)   | 10807<br>(7200 to 15671)           | 15.2<br>(10.1 to 22.1) | 325094<br>(252941 to 413603)           | 450.2<br>(352.4 to 570.3) |
|            | Male   | 94 (64 to 136)         | 0.4 (0.3 to 0.6)       | 427<br>(297 to 612)       | 1.6 (1.1 to 2.3)          | 88 (59 to 127)         | 0.4 (0.3 to 0.6)       | 2058<br>(1401 to 2985)      | 7.9 (5.4 to 11.4)           | 52 (31 to 81)                      | 0.2 (0.1 to 0.3)       | 2110<br>(1433 to 3062)                 | 8.1 (5.5 to 11.7)           | 151 (87 to 249)           | 0.2 (0.1 to 0.4)        | 904<br>(551 to 1476)         | 1.3 (0.8 to 2.1)          | 113 (65 to 186)         | 0.2 (0.1 to 0.3)       | 2690<br>(1551 to 4419)       | 3.9 (2.3 to 6.4)            | 96 (51 to 172)                     | 0.1 (0.1 to 0.3)       | 2786<br>(1604 to 4560)                 | 4 (2.4 to 6.6)            |
| Barbados   | Both   | 102 (92 to 112)        | 39.2<br>(35.4 to 43.1) | 819<br>(738 to 900)       | 316.6<br>(285.3 to 348)   | 49 (45 to 53)          | 18 (16.5 to 19.6)      | 1210<br>(1108 to 1321)      | 478.9<br>(437.3 to 525)     | 60 (42 to 80)                      | 23.2 (16 to 30.8)      | 1270<br>(1161 to 1383)                 | 502.1<br>(457 to 548.3)     | 254<br>(206 to 305)       | 55.5<br>(44.9 to 66.6)  | 2098<br>(1734 to 2491)       | 458.4<br>(375.6 to 546.8) | 95 (78 to 112)          | 20 (16.4 to 23.7)      | 2279<br>(1826 to 2723)       | 507.5<br>(406 to 609.2)     | 152<br>(105 to 211)                | 33.2<br>(22.8 to 46.6) | 2431<br>(1964 to 2905)                 | 540.7<br>(434.1 to 649.4) |

|          |        | 1990                |                     |                        |                        |                     |                     |                           |                         |                                    |                      |                                        |                          | 2019                 |                      |                          |                         |                     |                     |                           |                        |                                    |                      |                                        |                        |
|----------|--------|---------------------|---------------------|------------------------|------------------------|---------------------|---------------------|---------------------------|-------------------------|------------------------------------|----------------------|----------------------------------------|--------------------------|----------------------|----------------------|--------------------------|-------------------------|---------------------|---------------------|---------------------------|------------------------|------------------------------------|----------------------|----------------------------------------|------------------------|
|          |        | Incidence           |                     | Prevalence             |                        | Deaths              |                     | YLLs (Years of Life Lost) |                         | YLDs (Years Lived with Disability) |                      | DALYs (Disability-Adjusted Life Years) |                          | Incidence            |                      | Prevalence               |                         | Deaths              |                     | YLLs (Years of Life Lost) |                        | YLDs (Years Lived with Disability) |                      | DALYs (Disability-Adjusted Life Years) |                        |
| Location | Sex    | Number              | Rate                | Number                 | Rate                   | Number              | Rate                | Number                    | Rate                    | Number                             | Rate                 | Number                                 | Rate                     | Number               | Rate                 | Number                   | Rate                    | Number              | Rate                | Number                    | Rate                   | Number                             | Rate                 | Number                                 | Rate                   |
|          | Female | 101 (91 to 111)     | 69.7 (62.7 to 76.7) | 813 (732 to 895)       | 566.7 (509.7 to 622.5) | 48 (44 to 53)       | 31 (28.3 to 33.7)   | 1196 (1093 to 1308)       | 858.5 (782.4 to 942.9)  | 60 (41 to 80)                      | 41.3 (28.6 to 55)    | 1256 (1147 to 1370)                    | 899.9 (816.3 to 984.6)   | 252 (204 to 303)     | 102.3 (82.6 to 123)  | 2086 (1723 to 2477)      | 849.6 (694.6 to 1014.5) | 94 (77 to 111)      | 36.1 (29.5 to 42.7) | 2256 (1809 to 2693)       | 938.4 (749.5 to 1129)  | 150 (104 to 209)                   | 61.4 (42.1 to 86.2)  | 2407 (1944 to 2873)                    | 999.7 (800 to 1202.9)  |
|          | Male   | 1 (1 to 1)          | 0.8 (0.7 to 0.9)    | 5 (5 to 6)             | 4.6 (3.9 to 5.4)       | 1 (1 to 1)          | 0.6 (0.5 to 0.6)    | 13 (12 to 15)             | 11.6 (10.3 to 13)       | 1 (0 to 1)                         | 0.5 (0.3 to 0.6)     | 14 (12 to 16)                          | 12 (10.6 to 13.5)        | 2 (1 to 2)           | 0.9 (0.7 to 1.1)     | 12 (10 to 16)            | 5.7 (4.4 to 7.4)        | 1 (1 to 1)          | 0.6 (0.4 to 0.7)    | 23 (18 to 29)             | 10.7 (8.4 to 13.5)     | 1 (1 to 2)                         | 0.6 (0.4 to 0.8)     | 24 (19 to 30)                          | 11.2 (8.8 to 14.2)     |
| Belarus  | Both   | 3142 (2935 to 3342) | 25.3 (23.6 to 26.8) | 31443 (28696 to 34806) | 250.5 (228.5 to 275.9) | 1376 (1314 to 1447) | 10.9 (10.4 to 11.4) | 40643 (38877 to 42593)    | 327.2 (312.8 to 343.2)  | 2180 (1530 to 2992)                | 17.5 (12.2 to 24)    | 42824 (40820 to 44890)                 | 344.7 (328.5 to 361.2)   | 4133 (3140 to 5455)  | 28 (21.2 to 37)      | 41067 (33282 to 51330)   | 274.6 (220 to 345.9)    | 1297 (1006 to 1668) | 8.4 (6.5 to 10.8)   | 33305 (25281 to 43732)    | 226.7 (171.3 to 296.9) | 2901 (1859 to 4261)                | 19.6 (12.6 to 28.8)  | 36206 (27659 to 47348)                 | 246.2 (187.5 to 324.4) |
|          | Female | 3138 (2931 to 3338) | 44.2 (41.2 to 47)   | 31406 (28659 to 34772) | 429.5 (393.5 to 469.2) | 1373 (1311 to 1444) | 18.3 (17.5 to 19.2) | 40580 (38818 to 42524)    | 580.7 (554.4 to 608.6)  | 2177 (1527 to 2987)                | 30.4 (21.1 to 41.8)  | 42756 (40752 to 44828)                 | 611.1 (581.6 to 641.7)   | 4115 (3126 to 5431)  | 48.9 (36.9 to 64.8)  | 40934 (33169 to 51140)   | 475.9 (379.2 to 604.9)  | 1291 (1000 to 1660) | 14 (10.8 to 18.1)   | 33141 (25170 to 43554)    | 399.4 (301.1 to 526.6) | 2887 (1848 to 4243)                | 34.1 (21.8 to 50.4)  | 36028 (27520 to 47158)                 | 433.5 (329.2 to 573.1) |
|          | Male   | 5 (4 to 6)          | 0.1 (0.1 to 0.1)    | 37 (31 to 45)          | 0.8 (0.6 to 0.9)       | 2 (2 to 3)          | 0.1 (0 to 0.1)      | 63 (55 to 73)             | 1.3 (1.1 to 1.5)        | 4 (2 to 5)                         | 0.1 (0.1 to 0.1)     | 67 (59 to 77)                          | 1.4 (1.2 to 1.6)         | 18 (12 to 26)        | 0.3 (0.2 to 0.4)     | 134 (92 to 192)          | 2.2 (1.6 to 3.1)        | 6 (5 to 9)          | 0.1 (0.1 to 0.2)    | 164 (117 to 228)          | 2.7 (2 to 3.7)         | 14 (8 to 22)                       | 0.2 (0.1 to 0.4)     | 178 (126 to 248)                       | 3 (2.1 to 4)           |
| Belgium  | Both   | 7605 (7096 to 8119) | 54.9 (51.3 to 58.7) | 78846 (71784 to 86351) | 559.3 (512.8 to 609.7) | 2964 (2785 to 3099) | 20.3 (19.2 to 21.2) | 69243 (66386 to 71907)    | 508.5 (489 to 527.2)    | 5601 (3907 to 7654)                | 40.2 (28 to 54.9)    | 74844 (71334 to 78136)                 | 548.7 (524.4 to 572)     | 9697 (7576 to 12408) | 49.9 (38.7 to 64.5)  | 107879 (90955 to 129780) | 542.6 (450.8 to 662)    | 2919 (2586 to 3184) | 12.7 (11.5 to 13.7) | 56394 (52101 to 60765)    | 291.7 (272.4 to 313.3) | 7374 (4883 to 10603)               | 37.9 (24.8 to 54.9)  | 63769 (58318 to 70252)                 | 329.6 (302.9 to 362.1) |
|          | Female | 7570 (7063 to 8082) | 102 (95.1 to 109.3) | 78523 (71451 to 86008) | 1031.2 (947 to 1120.5) | 2948 (2770 to 3083) | 35.7 (33.9 to 37.2) | 68912 (66042 to 71574)    | 954.9 (919.6 to 989.7)  | 5572 (3886 to 7620)                | 74.6 (51.8 to 102.1) | 74484 (71028 to 77757)                 | 1029.5 (984.6 to 1073.3) | 9625 (7524 to 12320) | 95.2 (73.9 to 123.6) | 107213 (90363 to 128917) | 1034 (855.8 to 1267.1)  | 2896 (2566 to 3163) | 23.1 (21.1 to 24.9) | 55956 (51715 to 60285)    | 557.5 (520.8 to 599.1) | 7315 (4843 to 10484)               | 72.3 (47.2 to 104.9) | 63270 (57849 to 69765)                 | 629.8 (579.8 to 693.2) |
|          | Male   | 35 (28 to 42)       | 0.5 (0.4 to 0.7)    | 323 (268 to 395)       | 5.1 (4.3 to 6.2)       | 16 (13 to 18)       | 0.3 (0.2 to 0.3)    | 331 (286 to 382)          | 5.2 (4.5 to 6)          | 29 (20 to 42)                      | 0.5 (0.3 to 0.7)     | 360 (311 to 414)                       | 5.7 (4.9 to 6.5)         | 71 (50 to 102)       | 0.7 (0.5 to 1)       | 666 (497 to 895)         | 6.8 (5.1 to 9.2)        | 24 (19 to 29)       | 0.2 (0.2 to 0.3)    | 438 (360 to 532)          | 4.6 (3.8 to 5.5)       | 60 (36 to 92)                      | 0.6 (0.4 to 0.9)     | 498 (408 to 609)                       | 5.2 (4.3 to 6.3)       |
| Belize   | Both   | 9 (8 to 10)         | 9.3 (8.3 to 10.5)   | 77 (68 to 86)          | 79.8 (71.1 to 89.7)    | 5 (5 to 6)          | 5.3 (4.8 to 5.9)    | 141 (125 to 159)          | 142.1 (126.7 to 160.2)  | 5 (4 to 7)                         | 5.7 (4 to 7.7)       | 146 (130 to 164)                       | 147.8 (132.1 to 165.9)   | 44 (37 to 53)        | 13.8 (11.6 to 16.3)  | 366 (310 to 431)         | 113.4 (97 to 132.1)     | 18 (16 to 22)       | 6.2 (5.3 to 7.3)    | 585 (490 to 694)          | 175.9 (147.5 to 208.4) | 27 (18 to 38)                      | 8.2 (5.6 to 11.5)    | 612 (512 to 726)                       | 184.1 (154.5 to 217.7) |
|          | Female | 9 (8 to 10)         | 18.5 (16.4 to 20.9) | 75 (67 to 85)          | 159.2 (142.1 to 179.3) | 5 (4 to 5)          | 10.3 (9.2 to 11.5)  | 136 (121 to 155)          | 282 (250.6 to 318.8)    | 5 (4 to 7)                         | 11.2 (7.8 to 15.2)   | 142 (126 to 160)                       | 293.2 (261 to 329.4)     | 43 (36 to 52)        | 27 (22.7 to 32)      | 359 (304 to 423)         | 223.3 (191.2 to 260.5)  | 18 (15 to 21)       | 11.9 (10.1 to 14)   | 568 (475 to 674)          | 340.3 (285.2 to 403.5) | 26 (18 to 37)                      | 16.1 (11 to 22.6)    | 594 (497 to 706)                       | 356.3 (299.2 to 421.4) |
|          | Male   | 0 (0 to 0)          | 0.5 (0.4 to 0.6)    | 1 (1 to 2)             | 2.9 (2.4 to 3.3)       | 0 (0 to 0)          | 0.4 (0.4 to 0.5)    | 4 (4 to 5)                | 8.6 (7.4 to 9.8)        | 0 (0 to 0)                         | 0.3 (0.2 to 0.4)     | 4 (4 to 5)                             | 8.8 (7.7 to 10.2)        | 1 (1 to 1)           | 0.7 (0.6 to 0.9)     | 7 (5 to 8)               | 4.5 (3.7 to 5.5)        | 1 (1 to 1)          | 0.5 (0.4 to 0.6)    | 18 (15 to 21)             | 11.7 (9.7 to 13.9)     | 1 (0 to 1)                         | 0.5 (0.3 to 0.6)     | 18 (15 to 22)                          | 12.1 (10.1 to 14.3)    |
| Benin    | Both   | 177 (132 to 226)    | 8.2 (6.1 to 10.4)   | 1202 (952 to 1486)     | 55.3 (44 to 67.4)      | 140 (104 to 177)    | 6.8 (5 to 8.5)      | 4379 (3244 to 5663)       | 191.7 (142.2 to 246.1)  | 99 (64 to 142)                     | 4.5 (3 to 6.4)       | 4478 (3325 to 5784)                    | 196.2 (145.7 to 252.4)   | 638 (452 to 874)     | 11.3 (8.2 to 15.1)   | 4418 (3246 to 5889)      | 75.9 (57.8 to 98.4)     | 440 (319 to 590)    | 8.6 (6.4 to 11.1)   | 14012 (9778 to 19466)     | 228.8 (163.9 to 310.9) | 368 (219 to 553)                   | 6.3 (3.9 to 9.3)     | 14381 (10041 to 20040)                 | 235.1 (168.7 to 319.4) |
|          | Female | 176 (130 to 224)    | 15.5 (11.5 to 19.6) | 1195 (944 to 1478)     | 104.8 (83.4 to 128.1)  | 139 (103 to 176)    | 12.8 (9.5 to 16.1)  | 4346 (3210 to 5626)       | 361.2 (267.6 to 463.7)  | 99 (64 to 142)                     | 8.5 (5.6 to 12.1)    | 4444 (3288 to 5746)                    | 369.7 (274.6 to 475.2)   | 634 (448 to 869)     | 21.2 (15.4 to 28.3)  | 4394 (3224 to 5863)      | 143.4 (108.4 to 186.4)  | 437 (316 to 586)    | 15.8 (11.7 to 20.5) | 13919 (9713 to 19342)     | 432.9 (308.6 to 589.9) | 366 (217 to 550)                   | 11.9 (7.3 to 17.5)   | 14285 (9975 to 19877)                  | 444.8 (317.4 to 606.6) |
|          | Male   | 1 (1 to 2)          | 0.1 (0.1 to 0.2)    | 7 (5 to 10)            | 0.7 (0.5 to 0.9)       | 1 (1 to 2)          | 0.1 (0.1 to 0.2)    | 33 (24 to 46)             | 3.1 (2.2 to 4.4)        | 1 (0 to 1)                         | 0.1 (0 to 0.1)       | 34 (24 to 47)                          | 3.2 (2.2 to 4.5)         | 4 (3 to 6)           | 0.2 (0.1 to 0.3)     | 24 (16 to 34)            | 0.9 (0.6 to 1.3)        | 3 (2 to 5)          | 0.2 (0.1 to 0.2)    | 93 (63 to 137)            | 3.5 (2.3 to 5.2)       | 3 (2 to 4)                         | 0.1 (0.1 to 0.2)     | 96 (64 to 141)                         | 3.6 (2.4 to 5.3)       |
| Bermuda  | Both   | 33 (29 to 37)       | 51.4 (45.7 to 57.3) | 267 (237 to 297)       | 414.4 (368.1 to 460.3) | 13 (11 to 14)       | 21.1 (19 to 23.2)   | 327 (291 to 362)          | 507 (453.1 to 561.1)    | 20 (14 to 27)                      | 30.6 (22.1 to 41.7)  | 347 (309 to 384)                       | 537.7 (478.6 to 594.9)   | 50 (41 to 63)        | 43.1 (34.8 to 54.4)  | 453 (378 to 552)         | 389.6 (323 to 477.6)    | 14 (11 to 18)       | 11 (8.9 to 13.7)    | 283 (231 to 354)          | 248.6 (203.2 to 311.7) | 31 (21 to 44)                      | 26.9 (18 to 37.9)    | 314 (257 to 393)                       | 275.5 (224.8 to 346.9) |
|          | Female | 33 (29 to 37)       | 92.7 (82 to 103.9)  | 266 (236 to 296)       | 755.5 (670 to 842.8)   | 13 (11 to 14)       | 36.4 (32.7 to 40.2) | 325 (289 to 360)          | 924.7 (824.9 to 1023.6) | 20 (14 to 27)                      | 55.5 (39.8 to 75.8)  | 344 (307 to 382)                       | 980.2 (870 to 1087.5)    | 50 (40 to 63)        | 80.2 (64.6 to 101.2) | 451 (376 to 550)         | 730.3 (603.2 to 897.1)  | 14 (11 to 17)       | 19.3 (15.7 to 24.2) | 280 (229 to 351)          | 464.6 (379.8 to 582.3) | 31 (21 to 44)                      | 50.2 (33.6 to 71)    | 311 (255 to 390)                       | 514.8 (419.3 to 649.1) |

|                                  |        | 1990                   |                     |                           |                        |                     |                     |                           |                        |                                    |                    |                                        |                        | 2019                   |                     |                           |                        |                        |                     |                           |                         |                                    |                     |                                        |                         |
|----------------------------------|--------|------------------------|---------------------|---------------------------|------------------------|---------------------|---------------------|---------------------------|------------------------|------------------------------------|--------------------|----------------------------------------|------------------------|------------------------|---------------------|---------------------------|------------------------|------------------------|---------------------|---------------------------|-------------------------|------------------------------------|---------------------|----------------------------------------|-------------------------|
|                                  |        | Incidence              |                     | Prevalence                |                        | Deaths              |                     | YLLs (Years of Life Lost) |                        | YLDs (Years Lived with Disability) |                    | DALYs (Disability-Adjusted Life Years) |                        | Incidence              |                     | Prevalence                |                        | Deaths                 |                     | YLLs (Years of Life Lost) |                         | YLDs (Years Lived with Disability) |                     | DALYs (Disability-Adjusted Life Years) |                         |
| Location                         | Sex    | Number                 | Rate                | Number                    | Rate                   | Number              | Rate                | Number                    | Rate                   | Number                             | Rate               | Number                                 | Rate                   | Number                 | Rate                | Number                    | Rate                   | Number                 | Rate                | Number                    | Rate                    | Number                             | Rate                | Number                                 | Rate                    |
|                                  | Male   | 0 (0 to 0)             | 0.6 (0.5 to 0.7)    | 1 (1 to 1)                | 3.7 (3.1 to 4.5)       | 0 (0 to 0)          | 0.4 (0.3 to 0.5)    | 2 (2 to 3)                | 8 (6.8 to 9.4)         | 0 (0 to 0)                         | 0.4 (0.3 to 0.5)   | 2 (2 to 3)                             | 8.4 (7.2 to 9.9)       | 0 (0 to 0)             | 0.5 (0.4 to 0.7)    | 2 (2 to 3)                | 3.7 (2.8 to 4.8)       | 0 (0 to 0)             | 0.2 (0.2 to 0.3)    | 2 (2 to 3)                | 4.4 (3.5 to 5.5)        | 0 (0 to 0)                         | 0.4 (0.2 to 0.5)    | 3 (2 to 3)                             | 4.8 (3.7 to 6)          |
| Bhutan                           | Both   | 23 (15 to 32)          | 7.6 (5.1 to 10.7)   | 158 (112 to 211)          | 53.8 (40 to 69.8)      | 17 (11 to 24)       | 6.2 (4.1 to 8.6)    | 600 (391 to 860)          | 185.2 (122.5 to 261.2) | 13 (8 to 19)                       | 4.3 (2.6 to 6.5)   | 613 (399 to 877)                       | 189.4 (126.1 to 266.3) | 63 (44 to 87)          | 10.2 (7.2 to 13.9)  | 500 (366 to 675)          | 80 (59.9 to 106.1)     | 35 (24 to 47)          | 6 (4.3 to 8.1)      | 1042 (708 to 1455)        | 163.4 (112.3 to 225.3)  | 39 (23 to 61)                      | 6.2 (3.8 to 9.6)    | 1081 (733 to 1511)                     | 169.6 (116.7 to 233.7)  |
|                                  | Female | 22 (15 to 31)          | 14.9 (9.8 to 21.2)  | 156 (110 to 209)          | 105.8 (77 to 139)      | 17 (11 to 24)       | 11.8 (7.8 to 16.7)  | 590 (383 to 846)          | 372.2 (243.7 to 524.7) | 13 (7 to 19)                       | 8.4 (5 to 12.8)    | 603 (392 to 865)                       | 380.6 (249.6 to 534.7) | 62 (43 to 87)          | 20.9 (14.6 to 28.8) | 495 (362 to 669)          | 164.6 (122.6 to 218.8) | 34 (24 to 46)          | 12 (8.5 to 16.4)    | 1027 (694 to 1440)        | 335.3 (228.2 to 464.4)  | 38 (23 to 60)                      | 12.6 (7.7 to 19.7)  | 1065 (719 to 1493)                     | 347.9 (236.9 to 482.3)  |
|                                  | Male   | 0 (0 to 1)             | 0.4 (0.2 to 0.6)    | 2 (1 to 3)                | 1.6 (1 to 2.5)         | 0 (0 to 1)          | 0.4 (0.3 to 0.6)    | 10 (6 to 15)              | 7.8 (4.8 to 11.8)      | 0 (0 to 0)                         | 0.2 (0.1 to 0.3)   | 10 (6 to 16)                           | 8 (4.9 to 12.1)        | 1 (0 to 1)             | 0.3 (0.2 to 0.5)    | 5 (3 to 8)                | 1.7 (1 to 2.9)         | 1 (0 to 1)             | 0.2 (0.1 to 0.4)    | 15 (8 to 24)              | 5 (2.8 to 8.1)          | 1 (0 to 1)                         | 0.2 (0.1 to 0.3)    | 15 (9 to 25)                           | 5.2 (2.9 to 8.5)        |
| Bolivia (Plurinational State of) | Both   | 426 (327 to 550)       | 11.8 (9.3 to 15.1)  | 2825 (2229 to 3565)       | 77 (61.6 to 95.7)      | 307 (239 to 396)    | 9 (7.1 to 11.4)     | 9968 (7572 to 12986)      | 260.8 (200.7 to 338.8) | 226 (145 to 321)                   | 6.2 (4 to 8.6)     | 10194 (7737 to 13287)                  | 266.9 (205.7 to 346)   | 1704 (1282 to 2278)    | 18.1 (13.7 to 23.9) | 12596 (9603 to 16528)     | 131.2 (101.6 to 171.9) | 902 (689 to 1167)      | 10.1 (7.9 to 12.9)  | 26127 (19306 to 34779)    | 269.8 (200.9 to 355.9)  | 958 (590 to 1381)                  | 10.1 (6.2 to 14.4)  | 27086 (19973 to 35998)                 | 279.8 (208.9 to 367.8)  |
|                                  | Female | 419 (321 to 541)       | 22 (17.1 to 28.2)   | 2789 (2192 to 3529)       | 144.5 (115.5 to 180.3) | 301 (234 to 389)    | 16.5 (13 to 21.1)   | 9795 (7419 to 12817)      | 489.3 (374.2 to 637.7) | 222 (141 to 316)                   | 11.5 (7.5 to 16.2) | 10017 (7571 to 13119)                  | 500.8 (383.4 to 651.2) | 1685 (1268 to 2252)    | 34.5 (26.2 to 45.8) | 12482 (9512 to 16414)     | 252.1 (194.6 to 330.6) | 888 (678 to 1152)      | 19 (14.8 to 24.4)   | 25777 (18981 to 34364)    | 516.9 (383.6 to 683.2)  | 947 (579 to 1365)                  | 19.2 (11.9 to 27.6) | 26724 (19663 to 35508)                 | 536.1 (398.9 to 707.7)  |
|                                  | Male   | 7 (5 to 11)            | 0.5 (0.3 to 0.8)    | 36 (24 to 56)             | 2.3 (1.5 to 3.5)       | 7 (4 to 10)         | 0.5 (0.3 to 0.7)    | 172 (113 to 267)          | 10.7 (7 to 16.6)       | 4 (2 to 7)                         | 0.3 (0.2 to 0.4)   | 176 (116 to 273)                       | 11 (7.2 to 17)         | 19 (12 to 29)          | 0.5 (0.3 to 0.7)    | 113 (75 to 166)           | 2.6 (1.7 to 3.8)       | 14 (9 to 22)           | 0.4 (0.2 to 0.6)    | 350 (225 to 522)          | 8 (5.1 to 11.9)         | 12 (7 to 18)                       | 0.3 (0.2 to 0.4)    | 362 (232 to 542)                       | 8.3 (5.2 to 12.4)       |
| Bosnia and Herzegovina           | Both   | 647 (591 to 712)       | 14.5 (13.3 to 15.9) | 6651 (5941 to 7484)       | 153.1 (136 to 172)     | 324 (298 to 352)    | 7.7 (7.1 to 8.4)    | 10125 (9303 to 11046)     | 220.6 (203.5 to 240.1) | 452 (315 to 622)                   | 10.2 (7.1 to 14.1) | 10577 (9737 to 11518)                  | 230.8 (213 to 251.2)   | 1635 (1253 to 2105)    | 29.9 (22.9 to 38.7) | 15103 (12303 to 18817)    | 274.1 (221.2 to 342.1) | 668 (523 to 838)       | 11.7 (9.2 to 14.7)  | 15864 (12301 to 20128)    | 290.6 (224.7 to 370.6)  | 1087 (723 to 1550)                 | 19.9 (13.2 to 28.5) | 16951 (13093 to 21750)                 | 310.5 (240.6 to 401)    |
|                                  | Female | 644 (589 to 709)       | 26.7 (24.5 to 29.4) | 6617 (5912 to 7444)       | 277.5 (246.9 to 311)   | 323 (297 to 351)    | 13.8 (12.7 to 15)   | 10088 (9268 to 11010)     | 412 (379.3 to 448.9)   | 450 (313 to 620)                   | 18.7 (13 to 25.7)  | 10537 (9694 to 11478)                  | 430.7 (397.4 to 469.1) | 1612 (1234 to 2079)    | 55.5 (42.2 to 72.2) | 14925 (12170 to 18591)    | 509.8 (409.6 to 639.2) | 657 (513 to 825)       | 20.9 (16.4 to 26.3) | 15645 (12121 to 19837)    | 540.8 (416.6 to 692.5)  | 1070 (708 to 1527)                 | 36.9 (24.3 to 53.1) | 16715 (12896 to 21467)                 | 577.8 (444.9 to 746.1)  |
|                                  | Male   | 2 (2 to 3)             | 0.1 (0.1 to 0.2)    | 34 (27 to 41)             | 1.9 (1.6 to 2.4)       | 1 (1 to 2)          | 0.1 (0.1 to 0.1)    | 38 (33 to 44)             | 1.9 (1.6 to 2.2)       | 2 (2 to 3)                         | 0.1 (0.1 to 0.2)   | 40 (35 to 46)                          | 2 (1.8 to 2.3)         | 23 (16 to 30)          | 0.9 (0.6 to 1.1)    | 179 (130 to 234)          | 6.7 (4.9 to 8.6)       | 11 (8 to 14)           | 0.4 (0.3 to 0.6)    | 219 (157 to 288)          | 8.2 (5.9 to 10.7)       | 17 (10 to 26)                      | 0.6 (0.4 to 0.9)    | 236 (169 to 310)                       | 8.9 (6.4 to 11.6)       |
| Botswana                         | Both   | 90 (64 to 126)         | 14.7 (10.8 to 20.2) | 652 (484 to 863)          | 103.5 (79.5 to 133.9)  | 64 (47 to 87)       | 11.5 (8.6 to 15.3)  | 1981 (1391 to 2762)       | 299.3 (214.7 to 412)   | 53 (32 to 80)                      | 8.3 (5.2 to 12.3)  | 2034 (1424 to 2820)                    | 307.6 (220.7 to 423.2) | 448 (283 to 669)       | 28.2 (18.5 to 41.1) | 3356 (2190 to 4894)       | 202 (139.1 to 286.6)   | 235 (151 to 342)       | 17.3 (11.6 to 24.5) | 7369 (4546 to 11005)      | 432.5 (276.4 to 628.9)  | 269 (156 to 432)                   | 16.3 (9.8 to 25.5)  | 7638 (4706 to 11389)                   | 448.8 (288.5 to 656.2)  |
|                                  | Female | 87 (61 to 122)         | 25.4 (18.3 to 35)   | 634 (471 to 845)          | 181 (137.6 to 236.5)   | 62 (45 to 85)       | 19.3 (14.1 to 26.2) | 1915 (1341 to 2677)       | 525.7 (372.8 to 729)   | 51 (31 to 77)                      | 14.4 (8.9 to 21.6) | 1966 (1366 to 2744)                    | 540.2 (382 to 748.5)   | 438 (276 to 655)       | 49 (31.7 to 72.2)   | 3293 (2142 to 4813)       | 356.8 (240.8 to 510.8) | 230 (147 to 335)       | 28.6 (19 to 41)     | 7192 (4415 to 10806)      | 763.9 (483.3 to 1129.6) | 263 (152 to 424)                   | 28.5 (17 to 45.2)   | 7455 (4571 to 11175)                   | 792.5 (503.9 to 1179.1) |
|                                  | Male   | 3 (2 to 4)             | 1.2 (0.7 to 1.6)    | 18 (12 to 24)             | 6.7 (4.9 to 9)         | 2 (1 to 3)          | 1 (0.7 to 1.4)      | 66 (41 to 97)             | 23.4 (15.1 to 33.4)    | 2 (1 to 3)                         | 0.7 (0.4 to 1.1)   | 68 (43 to 100)                         | 24.2 (15.5 to 34.2)    | 9 (6 to 13)            | 1.6 (1 to 2.2)      | 63 (43 to 88)             | 9.8 (7 to 13.4)        | 6 (4 to 9)             | 1.2 (0.8 to 1.6)    | 177 (111 to 257)          | 25.6 (17.1 to 36.6)     | 6 (4 to 9)                         | 1 (0.6 to 1.5)      | 183 (115 to 265)                       | 26.6 (17.8 to 37.6)     |
| Brazil                           | Both   | 16875 (16237 to 17474) | 17 (16.2 to 17.6)   | 131278 (125391 to 137951) | 130.1 (123.7 to 137.2) | 8883 (8554 to 9203) | 9.7 (9.2 to 10)     | 278870 (269756 to 288610) | 267.7 (258.6 to 277.1) | 9638 (6909 to 12805)               | 9.5 (6.9 to 12.7)  | 288508 (279019 to 298920)              | 277.2 (267.3 to 287)   | 52473 (49142 to 55904) | 21.5 (20.1 to 22.9) | 441520 (414506 to 470953) | 180.5 (169.3 to 192.6) | 20121 (18758 to 21373) | 8.4 (7.8 to 9)      | 566622 (534087 to 600761) | 230.3 (216.9 to 244.2)  | 31437 (22505 to 42077)             | 12.9 (9.2 to 17.2)  | 598059 (563114 to 636739)              | 243.2 (229.1 to 258.8)  |
|                                  | Female | 16745 (16111 to 17344) | 31.9 (30.6 to 33.1) | 130390 (124548 to 137011) | 246 (234.1 to 259.4)   | 8789 (8465 to 9105) | 17.9 (17.1 to 18.5) | 276262 (267172 to 285982) | 507.1 (490.2 to 525.4) | 9555 (6847 to 12690)               | 18 (13 to 23.9)    | 285818 (276300 to 296119)              | 525.1 (506.7 to 543.9) | 51856 (48535 to 55276) | 39.6 (37.1 to 42.3) | 437220 (410282 to 466293) | 334.2 (313.6 to 356.8) | 19764 (18415 to 21001) | 15.1 (14.1 to 16.1) | 557413 (524342 to 591705) | 425.7 (400.7 to 451.7)  | 31035 (22234 to 41560)             | 23.7 (17 to 31.8)   | 588448 (553385 to 627133)              | 449.4 (422.8 to 478.8)  |
|                                  | Male   | 131 (121 to 141)       | 0.3 (0.3 to 0.3)    | 888 (808 to 987)          | 1.9 (1.8 to 2.1)       | 94 (87 to 101)      | 0.2 (0.2 to 0.3)    | 2608 (2420 to 2795)       | 5.7 (5.3 to 6.1)       | 83 (59 to 111)                     | 0.2 (0.1 to 0.2)   | 2691 (2501 to 2887)                    | 5.8 (5.4 to 6.3)       | 617 (557 to 684)       | 0.6 (0.5 to 0.6)    | 4300 (3864 to 4782)       | 3.9 (3.5 to 4.3)       | 357 (326 to 395)       | 0.3 (0.3 to 0.4)    | 9209 (8420 to 10113)      | 8.2 (7.5 to 9)          | 402 (286 to 540)                   | 0.4 (0.3 to 0.5)    | 9611 (8779 to 10553)                   | 8.6 (7.8 to 9.4)        |

|                   |        | 1990                |                     |                        |                        |                     |                     |                           |                        |                                    |                     |                                        |                        | 2019                |                      |                        |                        |                     |                     |                           |                        |                                    |                     |                                        |                        |
|-------------------|--------|---------------------|---------------------|------------------------|------------------------|---------------------|---------------------|---------------------------|------------------------|------------------------------------|---------------------|----------------------------------------|------------------------|---------------------|----------------------|------------------------|------------------------|---------------------|---------------------|---------------------------|------------------------|------------------------------------|---------------------|----------------------------------------|------------------------|
|                   |        | Incidence           |                     | Prevalence             |                        | Deaths              |                     | YLLs (Years of Life Lost) |                        | YLDs (Years Lived with Disability) |                     | DALYs (Disability-Adjusted Life Years) |                        | Incidence           |                      | Prevalence             |                        | Deaths              |                     | YLLs (Years of Life Lost) |                        | YLDs (Years Lived with Disability) |                     | DALYs (Disability-Adjusted Life Years) |                        |
| Location          | Sex    | Number              | Rate                | Number                 | Rate                   | Number              | Rate                | Number                    | Rate                   | Number                             | Rate                | Number                                 | Rate                   | Number              | Rate                 | Number                 | Rate                   | Number              | Rate                | Number                    | Rate                   | Number                             | Rate                | Number                                 | Rate                   |
| Brunei Darussalam | Both   | 32 (25 to 39)       | 20.9 (17.1 to 25.5) | 308 (251 to 371)       | 227.1 (191.2 to 268.4) | 13 (10 to 16)       | 10 (8.4 to 12)      | 495 (390 to 613)          | 307.9 (251 to 377.1)   | 23 (15 to 34)                      | 15.8 (10.5 to 22.6) | 518 (408 to 641)                       | 323.7 (263.5 to 393.8) | 142 (115 to 175)    | 34.7 (28.8 to 41.7)  | 1356 (1144 to 1621)    | 343.9 (296.1 to 400.9) | 43 (36 to 52)       | 12.4 (10.5 to 14.5) | 1495 (1225 to 1823)       | 349.3 (291.5 to 417.9) | 103 (70 to 146)                    | 25.4 (17.4 to 35)   | 1599 (1312 to 1935)                    | 374.6 (312.7 to 447)   |
|                   | Female | 31 (24 to 39)       | 42.9 (34.7 to 52.4) | 304 (247 to 366)       | 456.6 (383 to 540.8)   | 13 (10 to 16)       | 19.5 (16.2 to 23.5) | 486 (381 to 605)          | 640.5 (518.7 to 785.9) | 23 (15 to 34)                      | 32.1 (21.2 to 46.3) | 509 (399 to 629)                       | 672.6 (542.1 to 825.6) | 141 (114 to 174)    | 67.7 (55.5 to 82.1)  | 1346 (1136 to 1611)    | 666.3 (570.4 to 785.2) | 43 (36 to 52)       | 22.9 (19.3 to 27)   | 1480 (1208 to 1803)       | 688.3 (569.8 to 827.4) | 103 (69 to 145)                    | 49.5 (33.8 to 68.9) | 1582 (1291 to 1918)                    | 737.8 (612.5 to 882.3) |
|                   | Male   | 0 (0 to 1)          | 1.2 (0.8 to 1.8)    | 4 (3 to 5)             | 7.4 (5.3 to 10.2)      | 0 (0 to 0)          | 0.9 (0.6 to 1.4)    | 9 (6 to 13)               | 17.3 (11.4 to 25.3)    | 0 (0 to 1)                         | 0.8 (0.4 to 1.2)    | 9 (6 to 13)                            | 18.1 (11.9 to 26.7)    | 1 (1 to 2)          | 1 (0.8 to 1.4)       | 10 (8 to 13)           | 7.4 (5.8 to 9.6)       | 1 (0 to 1)          | 0.7 (0.5 to 0.9)    | 16 (12 to 21)             | 11.6 (8.8 to 15.2)     | 1 (1 to 1)                         | 0.7 (0.4 to 1)      | 17 (12 to 22)                          | 12.3 (9.3 to 16)       |
| Bulgaria          | Both   | 3382 (3111 to 3652) | 29 (26.7 to 31.3)   | 33403 (30249 to 37008) | 282.8 (257.4 to 311.4) | 1265 (1182 to 1350) | 10.8 (10 to 11.5)   | 37143 (34538 to 39802)    | 320.9 (298.2 to 343.9) | 2371 (1654 to 3247)                | 20.2 (14.1 to 27.8) | 39514 (36781 to 42410)                 | 341.1 (317.1 to 366.1) | 5122 (4003 to 6482) | 41.9 (32.4 to 53.3)  | 48341 (39616 to 58938) | 389.7 (312.9 to 481.6) | 1710 (1364 to 2121) | 12.9 (10.2 to 16)   | 40641 (31831 to 51298)    | 342.4 (264.8 to 436.3) | 3523 (2310 to 5030)                | 28.7 (18.3 to 41.3) | 44163 (34651 to 55947)                 | 371.1 (287.5 to 473.3) |
|                   | Female | 3362 (3090 to 3630) | 55.3 (50.8 to 59.7) | 33200 (30060 to 36790) | 535.8 (488.1 to 589.8) | 1258 (1175 to 1343) | 20.1 (18.7 to 21.5) | 36948 (34351 to 39605)    | 615 (571 to 659.6)     | 2354 (1642 to 3227)                | 38.5 (26.8 to 52.9) | 39302 (36594 to 42188)                 | 653.4 (606.7 to 701.5) | 5044 (3941 to 6398) | 78.2 (59.9 to 100.3) | 47723 (38965 to 58192) | 725.8 (578.7 to 902.2) | 1685 (1343 to 2090) | 23 (18.1 to 28.8)   | 40071 (31398 to 50525)    | 645.1 (496.1 to 828.7) | 3463 (2278 to 4963)                | 53.4 (34.3 to 77.4) | 43535 (34114 to 55155)                 | 698.5 (537.5 to 895.5) |
|                   | Male   | 20 (16 to 25)       | 0.4 (0.3 to 0.4)    | 203 (169 to 244)       | 3.7 (3.1 to 4.4)       | 8 (6 to 9)          | 0.1 (0.1 to 0.2)    | 195 (166 to 227)          | 3.5 (3 to 4)           | 17 (11 to 25)                      | 0.3 (0.2 to 0.4)    | 212 (180 to 248)                       | 3.8 (3.3 to 4.4)       | 78 (55 to 106)      | 1.4 (1 to 1.9)       | 618 (453 to 839)       | 10.9 (8 to 14.8)       | 26 (19 to 34)       | 0.4 (0.3 to 0.6)    | 569 (418 to 750)          | 10.1 (7.4 to 13.4)     | 59 (36 to 89)                      | 1 (0.6 to 1.5)      | 628 (461 to 831)                       | 11.1 (8.2 to 14.7)     |
| Burkina Faso      | Both   | 527 (404 to 664)    | 11.3 (8.8 to 14.1)  | 3386 (2703 to 4164)    | 70.2 (57.3 to 85.3)    | 417 (323 to 523)    | 9.6 (7.6 to 11.9)   | 13111 (9979 to 16771)     | 261.1 (200.1 to 330)   | 289 (198 to 420)                   | 6 (4.2 to 8.6)      | 13400 (10197 to 17152)                 | 267.1 (204.1 to 338)   | 1575 (1203 to 2013) | 15 (11.8 to 18.5)    | 10720 (8356 to 13414)  | 97 (78 to 118.6)       | 1088 (854 to 1366)  | 11.5 (9.2 to 14)    | 34921 (26289 to 45083)    | 302.4 (234.8 to 382.2) | 906 (581 to 1306)                  | 8.2 (5.4 to 11.8)   | 35827 (26850 to 46134)                 | 310.7 (240.8 to 391.7) |
|                   | Female | 523 (401 to 661)    | 21.1 (16.5 to 26.4) | 3369 (2687 to 4147)    | 131.3 (107 to 159.4)   | 415 (321 to 520)    | 18 (14.1 to 22.2)   | 13032 (9893 to 16696)     | 485.3 (370.4 to 612.7) | 288 (197 to 417)                   | 11.2 (7.8 to 16)    | 13320 (10120 to 17067)                 | 496.5 (378.4 to 628.9) | 1566 (1196 to 2002) | 27.1 (21.3 to 33.7)  | 10672 (8321 to 13365)  | 176.8 (141.9 to 216.8) | 1081 (848 to 1353)  | 20.5 (16.4 to 25.1) | 34735 (26134 to 44886)    | 551.6 (425.7 to 697.7) | 900 (578 to 1300)                  | 15 (9.8 to 21.4)    | 35635 (26711 to 45954)                 | 566.5 (436.6 to 714.7) |
|                   | Male   | 3 (2 to 5)          | 0.2 (0.1 to 0.2)    | 17 (12 to 26)          | 0.8 (0.5 to 1.1)       | 3 (2 to 4)          | 0.1 (0.1 to 0.2)    | 78 (51 to 121)            | 3.4 (2.2 to 5.3)       | 2 (1 to 3)                         | 0.1 (0.1 to 0.1)    | 80 (52 to 124)                         | 3.5 (2.3 to 5.4)       | 8 (6 to 12)         | 0.2 (0.1 to 0.3)     | 47 (33 to 69)          | 1 (0.7 to 1.5)         | 7 (5 to 10)         | 0.2 (0.1 to 0.3)    | 187 (127 to 276)          | 4 (2.7 to 5.9)         | 5 (3 to 8)                         | 0.1 (0.1 to 0.2)    | 192 (131 to 283)                       | 4.1 (2.8 to 6.1)       |
| Burundi           | Both   | 321 (236 to 427)    | 12.6 (9.4 to 16.7)  | 1920 (1471 to 2459)    | 73.3 (57.3 to 93.6)    | 266 (198 to 352)    | 11.1 (8.3 to 14.5)  | 8508 (6117 to 11527)      | 310.4 (227.7 to 414.9) | 175 (114 to 262)                   | 6.7 (4.4 to 10)     | 8683 (6257 to 11757)                   | 317.1 (233 to 423.6)   | 600 (413 to 847)    | 11.3 (8 to 15.7)     | 4017 (2887 to 5489)    | 71.9 (54.2 to 95.5)    | 436 (303 to 611)    | 9.2 (6.6 to 12.8)   | 14295 (9773 to 20289)     | 242.3 (168.5 to 340.7) | 345 (212 to 537)                   | 6.2 (3.9 to 9.5)    | 14640 (9996 to 20722)                  | 248.5 (173.7 to 348.4) |
|                   | Female | 288 (206 to 393)    | 20.3 (14.7 to 27.5) | 1783 (1345 to 2301)    | 123.6 (95.2 to 158.9)  | 234 (169 to 315)    | 17.3 (12.6 to 23.2) | 7767 (5445 to 10662)      | 513.8 (366.9 to 703.1) | 159 (100 to 243)                   | 11 (7 to 16.7)      | 7925 (5570 to 10871)                   | 524.7 (375.1 to 719.3) | 548 (375 to 772)    | 20.7 (14.5 to 28.8)  | 3754 (2711 to 5117)    | 137.4 (102.7 to 183.1) | 389 (269 to 547)    | 16.2 (11.3 to 22.5) | 13161 (8909 to 18674)     | 454.1 (314.7 to 640.1) | 316 (192 to 497)                   | 11.6 (7.2 to 18)    | 13477 (9149 to 19108)                  | 465.6 (322.4 to 657.7) |
|                   | Male   | 33 (21 to 50)       | 3.5 (2.2 to 5.3)    | 137 (91 to 199)        | 13.6 (9.2 to 19.4)     | 32 (20 to 48)       | 3.6 (2.3 to 5.4)    | 741 (455 to 1114)         | 72.1 (45.2 to 109.4)   | 17 (9 to 27)                       | 1.7 (0.9 to 2.8)    | 758 (465 to 1141)                      | 73.8 (46.3 to 112.6)   | 52 (31 to 82)       | 2.7 (1.6 to 4.1)     | 264 (167 to 404)       | 12 (7.8 to 17.6)       | 47 (28 to 73)       | 2.6 (1.6 to 4)      | 1134 (664 to 1794)        | 49.6 (29.9 to 77.6)    | 29 (15 to 48)                      | 1.3 (0.7 to 2.2)    | 1163 (681 to 1839)                     | 51 (30.7 to 79.6)      |
| Cabo Verde        | Both   | 24 (20 to 28)       | 11.4 (9.7 to 13.4)  | 180 (155 to 209)       | 85 (73 to 99.2)        | 17 (15 to 20)       | 8.1 (7 to 9.4)      | 484 (408 to 576)          | 235.1 (197.3 to 280.9) | 14 (9 to 20)                       | 6.7 (4.5 to 9.6)    | 498 (420 to 591)                       | 241.8 (202.4 to 289.3) | 69 (56 to 85)       | 15.2 (12.2 to 18.7)  | 534 (441 to 641)       | 116.6 (96.4 to 140)    | 38 (30 to 47)       | 8.8 (6.9 to 10.7)   | 967 (778 to 1181)         | 207.5 (166.7 to 251.9) | 42 (29 to 58)                      | 9.1 (6.2 to 12.6)   | 1009 (811 to 1235)                     | 216.6 (173.8 to 264)   |
|                   | Female | 24 (20 to 28)       | 19.4 (16.4 to 22.8) | 179 (154 to 209)       | 145.2 (124.6 to 169.3) | 17 (15 to 20)       | 13.8 (11.9 to 16.1) | 482 (407 to 575)          | 399.1 (334.6 to 476.7) | 14 (9 to 20)                       | 11.4 (7.7 to 16.4)  | 496 (419 to 590)                       | 410.5 (344.8 to 490.4) | 69 (55 to 85)       | 27.7 (22.2 to 34.2)  | 532 (440 to 639)       | 215.5 (177.8 to 259.2) | 38 (30 to 47)       | 15.4 (12.2 to 18.8) | 962 (774 to 1174)         | 385.3 (309.9 to 470.2) | 42 (28 to 58)                      | 16.8 (11.5 to 23.2) | 1004 (807 to 1229)                     | 402.1 (323.1 to 491.4) |
|                   | Male   | 0 (0 to 0)          | 0.1 (0 to 0.1)      | 0 (0 to 0)             | 0.4 (0.3 to 0.5)       | 0 (0 to 0)          | 0 (0 to 0.1)        | 1 (1 to 2)                | 1.2 (0.9 to 1.5)       | 0 (0 to 0)                         | 0 (0 to 0.1)        | 1 (1 to 2)                             | 1.2 (0.9 to 1.5)       | 0 (0 to 0)          | 0.2 (0.1 to 0.2)     | 2 (1 to 3)             | 1 (0.6 to 1.4)         | 0 (0 to 0)          | 0.1 (0.1 to 0.2)    | 5 (3 to 7)                | 2.4 (1.6 to 3.4)       | 0 (0 to 0)                         | 0.1 (0.1 to 0.2)    | 5 (3 to 7)                             | 2.5 (1.6 to 3.6)       |
| Cambodia          | Both   | 457 (348 to 603)    | 8.2 (6.2 to 10.7)   | 3451 (2767 to 4365)    | 63.6 (51.4 to 79.1)    | 333 (252 to 436)    | 6.3 (4.8 to 8.2)    | 12238 (9310 to 16270)     | 208.3 (157.8 to 274.2) | 275 (177 to 404)                   | 4.9 (3.3 to 7.1)    | 12512 (9526 to 16641)                  | 213.2 (161.4 to 281.2) | 1816 (1374 to 2290) | 13.3 (10.2 to 16.5)  | 14281 (11276 to 17524) | 103.4 (82.7 to 125.5)  | 1029 (794 to 1283)  | 8.1 (6.3 to 9.9)    | 33758 (25486 to 42929)    | 239.6 (182.7 to 301.3) | 1122 (731 to 1645)                 | 8.1 (5.4 to 11.8)   | 34880 (26336 to 44358)                 | 247.7 (188.9 to 311.1) |

|                          |        | 1990                      |                         |                              |                            |                        |                        |                              |                           |                                    |                        |                                        |                           | 2019                      |                         |                              |                            |                        |                        |                              |                           |                                    |                        |                                        |                           |
|--------------------------|--------|---------------------------|-------------------------|------------------------------|----------------------------|------------------------|------------------------|------------------------------|---------------------------|------------------------------------|------------------------|----------------------------------------|---------------------------|---------------------------|-------------------------|------------------------------|----------------------------|------------------------|------------------------|------------------------------|---------------------------|------------------------------------|------------------------|----------------------------------------|---------------------------|
|                          |        | Incidence                 |                         | Prevalence                   |                            | Deaths                 |                        | YLLs (Years of Life Lost)    |                           | YLDs (Years Lived with Disability) |                        | DALYs (Disability-Adjusted Life Years) |                           | Incidence                 |                         | Prevalence                   |                            | Deaths                 |                        | YLLs (Years of Life Lost)    |                           | YLDs (Years Lived with Disability) |                        | DALYs (Disability-Adjusted Life Years) |                           |
| Location                 | Sex    | Number                    | Rate                    | Number                       | Rate                       | Number                 | Rate                   | Number                       | Rate                      | Number                             | Rate                   | Number                                 | Rate                      | Number                    | Rate                    | Number                       | Rate                       | Number                 | Rate                   | Number                       | Rate                      | Number                             | Rate                   | Number                                 | Rate                      |
|                          | Female | 450<br>(341 to 597)       | 14.2<br>(10.7 to 18.5)  | 3420<br>(2739 to 4329)       | 110.6<br>(88.8 to 137.6)   | 328<br>(246 to 429)    | 10.9<br>(8.1 to 14.1)  | 12084<br>(9116 to 16161)     | 361.4<br>(272.7 to 477.4) | 271<br>(173 to 399)                | 8.5 (5.6 to 12.3)      | 12355<br>(9349 to 16485)               | 369.9<br>(278.5 to 488.6) | 1788<br>(1352 to 2261)    | 23.5<br>(17.9 to 29.4)  | 14123<br>(11112 to 17385)    | 184.4<br>(146.3 to 225)    | 1009<br>(772 to 1259)  | 13.9<br>(10.7 to 17.1) | 33209<br>(24987 to 42334)    | 428.3<br>(326.1 to 541.5) | 1104<br>(718 to 1622)              | 14.4<br>(9.5 to 21)    | 34314<br>(25890 to 43586)              | 442.7<br>(336.4 to 558.7) |
|                          | Male   | 6 (4 to 9)                | 0.3 (0.2 to 0.5)        | 31 (20 to 46)                | 1.4 (0.9 to 2.1)           | 5 (3 to 8)             | 0.3 (0.2 to 0.5)       | 154 (97 to 234)              | 7.2 (4.4 to 10.8)         | 4 (2 to 6)                         | 0.2 (0.1 to 0.3)       | 158 (99 to 239)                        | 7.3 (4.6 to 11)           | 28 (18 to 39)             | 0.6 (0.4 to 0.8)        | 158 (104 to 228)             | 2.9 (1.9 to 4.1)           | 20 (14 to 28)          | 0.4 (0.3 to 0.6)       | 549 (363 to 782)             | 10 (6.7 to 14)            | 18 (10 to 28)                      | 0.3 (0.2 to 0.5)       | 567 (372 to 806)                       | 10.4 (6.9 to 14.5)        |
| Cameroon                 | Both   | 551<br>(436 to 683)       | 10.9<br>(8.7 to 13.4)   | 3629<br>(2962 to 4402)       | 70.5<br>(58.1 to 84.5)     | 423<br>(331 to 523)    | 8.9 (7.1 to 11)        | 13728<br>(10723 to 17142)    | 251.6<br>(197.7 to 312.1) | 306<br>(202 to 432)                | 5.9 (3.9 to 8.2)       | 14034<br>(10899 to 17507)              | 257.6<br>(201.7 to 319.4) | 2256<br>(1523 to 3301)    | 16.1<br>(11.1 to 22.9)  | 15635<br>(10963 to 22404)    | 106.5<br>(77.3 to 147.9)   | 1462<br>(1004 to 2098) | 11.6<br>(8.3 to 16.2)  | 47508<br>(31558 to 70073)    | 309.8<br>(210.3 to 448.5) | 1310<br>(766 to 2063)              | 9 (5.4 to 13.8)        | 48818<br>(32371 to 72033)              | 318.7<br>(218.4 to 464.2) |
|                          | Female | 548<br>(433 to 679)       | 21.1<br>(16.8 to 25.9)  | 3607<br>(2942 to 4377)       | 136.8<br>(112.6 to 163.8)  | 419<br>(328 to 519)    | 17.2<br>(13.7 to 21.2) | 13634<br>(10632 to 17030)    | 488.5<br>(383.3 to 607.2) | 304<br>(200 to 429)                | 11.4<br>(7.5 to 15.9)  | 13938<br>(10828 to 17385)              | 499.9<br>(391.7 to 620.5) | 2242<br>(1511 to 3285)    | 30.8<br>(21.1 to 44.3)  | 15550<br>(10886 to 22289)    | 206.7<br>(149.2 to 289)    | 1451<br>(998 to 2087)  | 21.9<br>(15.6 to 30.8) | 47189<br>(31302 to 69578)    | 601.5<br>(407.2 to 875.5) | 1301<br>(761 to 2051)              | 17.3<br>(10.4 to 26.7) | 48490<br>(32109 to 71522)              | 618.8<br>(422.3 to 901.4) |
|                          | Male   | 4 (2 to 6)                | 0.2 (0.1 to 0.2)        | 22 (15 to 31)                | 0.9 (0.6 to 1.2)           | 3 (2 to 5)             | 0.2 (0.1 to 0.2)       | 94 (61 to 136)               | 3.7 (2.4 to 5.5)          | 2 (1 to 4)                         | 0.1 (0.1 to 0.2)       | 96 (63 to 139)                         | 3.8 (2.5 to 5.7)          | 14 (9 to 22)              | 0.2 (0.2 to 0.4)        | 85 (56 to 124)               | 1.3 (0.8 to 1.9)           | 11 (7 to 17)           | 0.2 (0.1 to 0.3)       | 319 (208 to 481)             | 4.7 (3 to 7.2)            | 9 (5 to 15)                        | 0.1 (0.1 to 0.2)       | 328 (213 to 492)                       | 4.9 (3.1 to 7.4)          |
| Canada                   | Both   | 16637<br>(15606 to 17749) | 52.6<br>(49.3 to 56.2)  | 170428<br>(157805 to 186280) | 537.1<br>(497.5 to 586.3)  | 4663<br>(4422 to 4840) | 14.7<br>(13.9 to 15.3) | 116769<br>(112650 to 120348) | 372.1<br>(358.9 to 383.5) | 12337<br>(8540 to 16881)           | 38.9<br>(26.9 to 53)   | 129107<br>(123019 to 135084)           | 411<br>(392.3 to 430)     | 28616<br>(22312 to 36219) | 47.2<br>(36.8 to 60.5)  | 309384<br>(256869 to 371612) | 498.9<br>(409.7 to 607.4)  | 6565<br>(5890 to 7168) | 9.8 (8.9 to 10.6)      | 138252<br>(127187 to 148865) | 232.7<br>(215 to 249.9)   | 21600<br>(14425 to 31314)          | 35.4<br>(23.4 to 51.4) | 159852<br>(144867 to 175827)           | 268.2<br>(244.4 to 294.2) |
|                          | Female | 16591<br>(15564 to 17700) | 98.8<br>(92.6 to 105.6) | 169883<br>(157302 to 185566) | 998.8<br>(925.9 to 1086.7) | 4644<br>(4403 to 4821) | 26.5<br>(25.2 to 27.5) | 116323<br>(112190 to 119879) | 703.9<br>(679.9 to 724.9) | 12294<br>(8509 to 16824)           | 72.8<br>(50.2 to 99.4) | 128618<br>(122498 to 134617)           | 776.7<br>(742.1 to 812.7) | 28469<br>(22222 to 36022) | 90.1<br>(70.1 to 115.6) | 307829<br>(255609 to 369903) | 949.9<br>(779.5 to 1159.7) | 6515<br>(5843 to 7113) | 18 (16.4 to 19.5)      | 137243<br>(126174 to 147832) | 443.9<br>(410.1 to 476.5) | 21472<br>(14322 to 31121)          | 67.6<br>(44.6 to 98)   | 158715<br>(143706 to 174308)           | 511.5<br>(465 to 561.2)   |
|                          | Male   | 46 (38 to 55)             | 0.3 (0.3 to 0.4)        | 545 (452 to 649)             | 3.8 (3.2 to 4.6)           | 20 (17 to 22)          | 0.1 (0.1 to 0.2)       | 446 (399 to 494)             | 3.1 (2.8 to 3.4)          | 43 (28 to 62)                      | 0.3 (0.2 to 0.4)       | 489 (432 to 547)                       | 3.4 (3 to 3.8)            | 146 (99 to 207)           | 0.5 (0.3 to 0.7)        | 1554 (1191 to 2043)          | 5.1 (3.9 to 6.6)           | 51 (41 to 62)          | 0.2 (0.1 to 0.2)       | 1009 (829 to 1216)           | 3.4 (2.8 to 4)            | 128 (76 to 206)                    | 0.4 (0.3 to 0.7)       | 1137 (927 to 1382)                     | 3.8 (3.2 to 4.6)          |
| Central African Republic | Both   | 165<br>(125 to 214)       | 12.4<br>(9.6 to 15.8)   | 1013<br>(791 to 1261)        | 74.2<br>(59.7 to 91)       | 134<br>(102 to 172)    | 11 (8.4 to 13.9)       | 4580<br>(3427 to 5978)       | 310.3<br>(236.4 to 399.6) | 90 (59 to 129)                     | 6.6 (4.4 to 9.3)       | 4670<br>(3494 to 6107)                 | 316.8<br>(242.1 to 408.6) | 339<br>(212 to 547)       | 13.4<br>(8.6 to 21.6)   | 2098<br>(1414 to 3213)       | 79.1<br>(56.1 to 117.5)    | 267<br>(169 to 429)    | 11.7<br>(7.6 to 18.6)  | 9169<br>(5697 to 14972)      | 317.3<br>(200.9 to 509.2) | 185<br>(104 to 318)                | 7 (4.2 to 11.6)        | 9354<br>(5800 to 15283)                | 324.3<br>(206.4 to 520.4) |
|                          | Female | 160<br>(121 to 206)       | 22.1<br>(16.8 to 28.2)  | 987<br>(772 to 1235)         | 133.2<br>(106.5 to 163.8)  | 129 (98 to 167)        | 19.1<br>(14.5 to 24.2) | 4438<br>(3341 to 5795)       | 560.3<br>(425.5 to 724.7) | 87 (57 to 125)                     | 11.7<br>(7.7 to 16.5)  | 4525<br>(3402 to 5921)                 | 571.9<br>(434.3 to 741.3) | 331<br>(207 to 537)       | 23.7 (15 to 38.4)       | 2057<br>(1369 to 3164)       | 142.6<br>(99.3 to 213.2)   | 261<br>(165 to 420)    | 20.2<br>(13.1 to 32.3) | 8948<br>(5538 to 14564)      | 580.7<br>(366 to 936.5)   | 180<br>(101 to 311)                | 12.5<br>(7.3 to 20.9)  | 9128<br>(5662 to 14866)                | 593.2<br>(374.3 to 952.6) |
|                          | Male   | 5 (3 to 9)                | 0.9 (0.5 to 1.5)        | 25 (16 to 40)                | 4.3 (2.8 to 6.7)           | 5 (3 to 8)             | 0.9 (0.5 to 1.4)       | 143 (81 to 241)              | 22.4<br>(12.9 to 37.6)    | 3 (2 to 5)                         | 0.5 (0.3 to 0.9)       | 146 (83 to 246)                        | 23 (13.2 to 38.3)         | 8 (4 to 13)               | 0.7 (0.4 to 1.2)        | 41 (25 to 67)                | 3.7 (2.5 to 5.6)           | 7 (4 to 11)            | 0.7 (0.4 to 1.1)       | 221 (121 to 376)             | 17.7<br>(10.3 to 29.1)    | 5 (2 to 8)                         | 0.4 (0.2 to 0.7)       | 225 (124 to 384)                       | 18.1<br>(10.6 to 29.8)    |
| Chad                     | Both   | 204<br>(150 to 272)       | 6.8 (5.1 to 9.1)        | 1387<br>(1084 to 1770)       | 46.4<br>(36.7 to 58.9)     | 166<br>(124 to 220)    | 5.8 (4.3 to 7.6)       | 5199<br>(3773 to 7052)       | 166.3<br>(121.6 to 223.4) | 115 (72 to 169)                    | 3.8 (2.4 to 5.5)       | 5313<br>(3857 to 7194)                 | 170<br>(124.8 to 228.4)   | 555<br>(384 to 752)       | 8.4 (5.9 to 11.2)       | 3686<br>(2681 to 4858)       | 54.4<br>(40.9 to 69.4)     | 406<br>(285 to 544)    | 6.7 (4.8 to 8.8)       | 13471<br>(9153 to 18610)     | 187.8<br>(130.5 to 253.8) | 314<br>(193 to 487)                | 4.6 (2.9 to 7)         | 13785<br>(9380 to 18992)               | 192.4<br>(134.1 to 260.5) |
|                          | Female | 202<br>(149 to 270)       | 12.9<br>(9.6 to 17.1)   | 1378<br>(1076 to 1762)       | 87.9<br>(69.4 to 111.3)    | 164<br>(123 to 219)    | 10.9<br>(8.1 to 14.4)  | 5160<br>(3742 to 7018)       | 312.6<br>(228.9 to 420.3) | 114 (71 to 168)                    | 7.1 (4.5 to 10.5)      | 5273<br>(3823 to 7159)                 | 319.7<br>(234.9 to 430.5) | 550<br>(380 to 746)       | 17.7<br>(12.5 to 23.6)  | 3660<br>(2659 to 4830)       | 115.1<br>(86.6 to 147.1)   | 402<br>(281 to 540)    | 14 (10 to 18.6)        | 13359<br>(9068 to 18469)     | 392.9<br>(272 to 532.3)   | 311<br>(191 to 483)                | 9.7 (6.1 to 14.7)      | 13670<br>(9269 to 18850)               | 402.6<br>(279.4 to 542.9) |
|                          | Male   | 2 (1 to 2)                | 0.1 (0.1 to 0.2)        | 9 (6 to 12)                  | 0.6 (0.4 to 0.8)           | 1 (1 to 2)             | 0.1 (0.1 to 0.2)       | 39 (27 to 57)                | 2.6 (1.7 to 3.9)          | 1 (1 to 2)                         | 0.1 (0 to 0.1)         | 40 (27 to 58)                          | 2.7 (1.8 to 4)            | 5 (3 to 7)                | 0.1 (0.1 to 0.2)        | 26 (18 to 36)                | 0.7 (0.5 to 1)             | 4 (3 to 6)             | 0.1 (0.1 to 0.2)       | 112 (76 to 162)              | 3.2 (2.1 to 4.7)          | 3 (2 to 4)                         | 0.1 (0 to 0.1)         | 115 (78 to 166)                        | 3.3 (2.2 to 4.8)          |
| Chile                    | Both   | 1739<br>(1639 to 1845)    | 16.7<br>(15.7 to 17.7)  | 17048<br>(15478 to 18863)    | 164<br>(148.4 to 182.6)    | 961<br>(918 to 1004)   | 9.8 (9.3 to 10.3)      | 27095<br>(25816 to 28407)    | 252.6<br>(240.9 to 264.7) | 1224<br>(849 to 1685)              | 11.6<br>(8.1 to 15.9)  | 28319<br>(26865 to 29653)              | 264.2<br>(251.3 to 276.8) | 4937<br>(3837 to 6318)    | 21.2<br>(16.4 to 27.1)  | 48329<br>(39563 to 59222)    | 206.3<br>(168.6 to 253.4)  | 1831<br>(1667 to 2003) | 7.7 (7 to 8.5)         | 43499<br>(39768 to 47499)    | 187<br>(171.2 to 203.2)   | 3534<br>(2303 to 5062)             | 15.2<br>(9.9 to 21.7)  | 47034<br>(42569 to 51588)              | 202.2<br>(183.5 to 221.8) |
|                          | Female | 1727<br>(1626 to 1832)    | 30.7<br>(28.8 to 32.5)  | 16949<br>(15385 to 18757)    | 301.6<br>(273.1 to 334.6)  | 952<br>(909 to 995)    | 17.7<br>(16.9 to 18.6) | 26894<br>(25625 to 28195)    | 469.3<br>(447.7 to 492.3) | 1215<br>(841 to 1672)              | 21.4<br>(14.9 to 29.4) | 28108<br>(26666 to 29439)              | 490.7<br>(466.1 to 514.2) | 4907<br>(3808 to 6287)    | 39.4<br>(30.5 to 50.5)  | 48062<br>(39374 to 58932)    | 383.7<br>(313.5 to 472.2)  | 1816<br>(1651 to 1986) | 13.9<br>(12.7 to 15.2) | 43190<br>(39446 to 47184)    | 349<br>(319.4 to 379.4)   | 3510<br>(2285 to 5032)             | 28.2<br>(18.3 to 40.5) | 46700<br>(42251 to 51248)              | 377.2<br>(341.6 to 414.1) |

|              |        | 1990                   |                     |                           |                        |                        |                     |                              |                          |                                    |                     |                                        |                          | 2019                      |                     |                              |                        |                         |                     |                              |                         |                                    |                     |                                        |                         |
|--------------|--------|------------------------|---------------------|---------------------------|------------------------|------------------------|---------------------|------------------------------|--------------------------|------------------------------------|---------------------|----------------------------------------|--------------------------|---------------------------|---------------------|------------------------------|------------------------|-------------------------|---------------------|------------------------------|-------------------------|------------------------------------|---------------------|----------------------------------------|-------------------------|
|              |        | Incidence              |                     | Prevalence                |                        | Deaths                 |                     | YLLs (Years of Life Lost)    |                          | YLDs (Years Lived with Disability) |                     | DALYs (Disability-Adjusted Life Years) |                          | Incidence                 |                     | Prevalence                   |                        | Deaths                  |                     | YLLs (Years of Life Lost)    |                         | YLDs (Years Lived with Disability) |                     | DALYs (Disability-Adjusted Life Years) |                         |
| Location     | Sex    | Number                 | Rate                | Number                    | Rate                   | Number                 | Rate                | Number                       | Rate                     | Number                             | Rate                | Number                                 | Rate                     | Number                    | Rate                | Number                       | Rate                   | Number                  | Rate                | Number                       | Rate                    | Number                             | Rate                | Number                                 | Rate                    |
|              | Male   | 13 (11 to 15)          | 0.3 (0.2 to 0.3)    | 99 (85 to 118)            | 2.2 (1.9 to 2.7)       | 9 (8 to 10)            | 0.2 (0.2 to 0.2)    | 201 (176 to 232)             | 4.3 (3.8 to 5)           | 9 (6 to 13)                        | 0.2 (0.1 to 0.3)    | 211 (185 to 242)                       | 4.6 (4 to 5.3)           | 30 (21 to 42)             | 0.3 (0.2 to 0.4)    | 267 (202 to 354)             | 2.5 (1.9 to 3.3)       | 16 (12 to 19)           | 0.2 (0.1 to 0.2)    | 309 (252 to 371)             | 2.9 (2.4 to 3.5)        | 25 (15 to 38)                      | 0.2 (0.1 to 0.4)    | 334 (271 to 400)                       | 3.1 (2.5 to 3.8)        |
| China        | Both   | 81623 (66873 to 97103) | 8.5 (7.1 to 10.1)   | 769644 (645635 to 895193) | 82.5 (69.8 to 95.2)    | 41804 (34550 to 49509) | 4.7 (4 to 5.6)      | 1379561 (1129052 to 1645184) | 139.9 (114.9 to 166.3)   | 55544 (37300 to 76891)             | 5.8 (3.9 to 8)      | 1435105 (1184138 to 1708681)           | 145.7 (121.1 to 172.6)   | 375484 (296626 to 469983) | 18.3 (14.5 to 22.9) | 3528138 (2864089 to 4260074) | 171.6 (139.7 to 207)   | 96306 (77323 to 118090) | 4.9 (3.9 to 5.9)    | 2698059 (2150312 to 3360102) | 131.5 (104.9 to 163.6)  | 259395 (168945 to 367512)          | 12.7 (8.2 to 17.9)  | 2957454 (2408511 to 3590166)           | 144.2 (117.3 to 175)    |
|              | Female | 81074 (66340 to 96525) | 17.1 (14 to 20.3)   | 764798 (641383 to 889871) | 163.4 (137.9 to 189)   | 41429 (34153 to 49151) | 9.2 (7.6 to 10.8)   | 1368351 (1117748 to 1634935) | 282.5 (231.5 to 336.5)   | 55135 (36999 to 76349)             | 11.6 (7.8 to 16)    | 1423486 (1173659 to 1695997)           | 294 (243.5 to 349.1)     | 368375 (290086 to 463336) | 35.6 (28.1 to 44.8) | 3473262 (2806059 to 4203027) | 334.3 (270.4 to 404.7) | 93499 (74511 to 115420) | 9 (7.2 to 11.1)     | 2623126 (2075330 to 3276201) | 253.4 (200.6 to 316.5)  | 254115 (164595 to 360800)          | 24.6 (15.9 to 34.9) | 2877240 (2323688 to 3513542)           | 278 (224.3 to 339.9)    |
|              | Male   | 549 (445 to 657)       | 0.1 (0.1 to 0.1)    | 4846 (3922 to 6034)       | 1.1 (0.9 to 1.3)       | 375 (303 to 452)       | 0.1 (0.1 to 0.1)    | 11210 (9063 to 13671)        | 2.4 (1.9 to 2.8)         | 409 (274 to 590)                   | 0.1 (0.1 to 0.1)    | 11618 (9457 to 14003)                  | 2.4 (2 to 2.9)           | 7110 (5341 to 9084)       | 0.7 (0.5 to 0.9)    | 54876 (42454 to 68847)       | 5.3 (4.2 to 6.7)       | 2808 (2149 to 3533)     | 0.3 (0.2 to 0.4)    | 74933 (56160 to 95078)       | 7.2 (5.5 to 9.1)        | 5280 (3307 to 7654)                | 0.5 (0.3 to 0.7)    | 80213 (61437 to 100882)                | 7.7 (6 to 9.6)          |
| Colombia     | Both   | 3015 (2846 to 3195)    | 15.1 (14.2 to 16)   | 23739 (22171 to 25278)    | 117.3 (109.5 to 125)   | 1446 (1384 to 1512)    | 7.8 (7.4 to 8.1)    | 45672 (43823 to 47686)       | 217.2 (208.1 to 226.9)   | 1747 (1248 to 2366)                | 8.6 (6.1 to 11.6)   | 47419 (45444 to 49651)                 | 225.8 (216.1 to 236.2)   | 11162 (8522 to 14373)     | 21.2 (16.2 to 27.3) | 96864 (75929 to 122446)      | 184.3 (144.2 to 233)   | 3401 (2645 to 4331)     | 6.4 (5 to 8.1)      | 95283 (72988 to 123845)      | 181 (139 to 235.3)      | 6770 (4477 to 9717)                | 12.9 (8.5 to 18.6)  | 102053 (78322 to 132897)               | 193.8 (149 to 252.2)    |
|              | Female | 2997 (2828 to 3177)    | 29.2 (27.6 to 31)   | 23629 (22051 to 25173)    | 228.3 (213 to 243.6)   | 1433 (1371 to 1498)    | 14.9 (14.2 to 15.6) | 45326 (43451 to 47352)       | 421.9 (404.1 to 440.9)   | 1736 (1240 to 2352)                | 16.8 (11.9 to 22.6) | 47062 (45058 to 49297)                 | 438.7 (419.6 to 458.9)   | 11117 (8483 to 14317)     | 39.4 (30.1 to 50.8) | 96547 (75683 to 122075)      | 342.9 (267.6 to 434.1) | 3376 (2627 to 4297)     | 11.7 (9.1 to 15)    | 94707 (72566 to 123199)      | 337 (258.8 to 439)      | 6740 (4457 to 9678)                | 24 (15.8 to 34.6)   | 101447 (77878 to 132064)               | 360.9 (276.9 to 470.1)  |
|              | Male   | 18 (15 to 21)          | 0.2 (0.2 to 0.2)    | 109 (92 to 129)           | 1.1 (1 to 1.4)         | 13 (11 to 14)          | 0.2 (0.1 to 0.2)    | 346 (304 to 395)             | 3.6 (3.1 to 4.2)         | 11 (7 to 15)                       | 0.1 (0.1 to 0.2)    | 357 (313 to 406)                       | 3.7 (3.3 to 4.3)         | 46 (32 to 63)             | 0.2 (0.1 to 0.3)    | 318 (223 to 440)             | 1.3 (0.9 to 1.8)       | 24 (18 to 33)           | 0.1 (0.1 to 0.1)    | 576 (414 to 786)             | 2.4 (1.7 to 3.2)        | 30 (18 to 46)                      | 0.1 (0.1 to 0.2)    | 606 (437 to 825)                       | 2.5 (1.8 to 3.4)        |
| Comoros      | Both   | 23 (11 to 33)          | 9.8 (5.2 to 13.7)   | 145 (81 to 198)           | 60.9 (36.5 to 81.9)    | 19 (10 to 27)          | 8.6 (4.9 to 11.9)   | 570 (251 to 841)             | 231.2 (110.3 to 334.4)   | 12 (6 to 19)                       | 5.3 (2.7 to 7.9)    | 583 (257 to 860)                       | 236.5 (112.8 to 340.2)   | 78 (57 to 103)            | 15.1 (11.3 to 19.7) | 522 (394 to 671)             | 97.7 (74.9 to 124)     | 56 (43 to 73)           | 11.5 (8.9 to 14.9)  | 1636 (1181 to 2187)          | 299.7 (220.3 to 401.4)  | 44 (28 to 65)                      | 8.3 (5.3 to 12)     | 1680 (1208 to 2237)                    | 308 (225.3 to 409.9)    |
|              | Female | 21 (10 to 30)          | 16.9 (8.7 to 24.3)  | 135 (76 to 187)           | 109.3 (65.1 to 148.8)  | 17 (9 to 24)           | 14.4 (7.8 to 20.4)  | 526 (229 to 787)             | 408.4 (189.8 to 601)     | 11 (5 to 17)                       | 9.2 (4.5 to 13.8)   | 537 (235 to 803)                       | 417.5 (195.8 to 613.4)   | 74 (53 to 99)             | 26.5 (19.4 to 35.1) | 501 (373 to 652)             | 176.6 (134.1 to 228.3) | 53 (39 to 69)           | 19.7 (14.8 to 25.8) | 1557 (1103 to 2112)          | 539.8 (384.8 to 725)    | 42 (26 to 62)                      | 14.7 (9.2 to 21.6)  | 1598 (1128 to 2158)                    | 554.5 (396.9 to 744.4)  |
|              | Male   | 2 (1 to 4)             | 2.3 (1.2 to 3.6)    | 10 (5 to 15)              | 9.5 (5.2 to 14.4)      | 2 (1 to 3)             | 2.4 (1.3 to 3.8)    | 45 (20 to 75)                | 43.7 (21.3 to 71.4)      | 1 (0 to 2)                         | 1.1 (0.5 to 1.9)    | 46 (21 to 77)                          | 44.8 (22.1 to 73.1)      | 4 (2 to 7)                | 2.2 (1.2 to 3.6)    | 21 (12 to 35)                | 10.1 (5.9 to 16.1)     | 4 (2 to 6)              | 2.1 (1.1 to 3.5)    | 80 (40 to 136)               | 37.6 (19.4 to 63)       | 2 (1 to 4)                         | 1.1 (0.5 to 2)      | 82 (41 to 140)                         | 38.8 (19.9 to 64.5)     |
| Congo        | Both   | 201 (139 to 278)       | 17.4 (12.4 to 23.7) | 1239 (893 to 1654)        | 102.6 (76 to 133.8)    | 158 (111 to 217)       | 14.8 (10.6 to 19.9) | 5124 (3477 to 7225)          | 406.5 (281.5 to 561.6)   | 110 (68 to 163)                    | 9.2 (5.8 to 13.4)   | 5234 (3549 to 7373)                    | 415.7 (287.6 to 573)     | 661 (392 to 989)          | 21.2 (13 to 31)     | 4435 (2807 to 6464)          | 134.1 (87.8 to 189.8)  | 441 (268 to 653)        | 16.1 (10 to 23.1)   | 14513 (8498 to 21982)        | 421.5 (256.4 to 625.7)  | 380 (210 to 612)                   | 11.6 (6.7 to 18.2)  | 14893 (8715 to 22497)                  | 433.2 (264.1 to 644.1)  |
|              | Female | 196 (135 to 272)       | 30.5 (21.3 to 42)   | 1214 (872 to 1627)        | 182.1 (133.7 to 240.6) | 154 (107 to 212)       | 25.5 (18.2 to 34.5) | 4998 (3372 to 7076)          | 725.6 (496.3 to 1008.8)  | 107 (65 to 159)                    | 16.1 (10.1 to 23.7) | 5105 (3457 to 7219)                    | 741.7 (507.3 to 1033.4)  | 651 (385 to 977)          | 40.5 (24.5 to 59.7) | 4374 (2752 to 6391)          | 258.9 (167.5 to 369.3) | 433 (261 to 643)        | 29.9 (18.5 to 43.3) | 14275 (8263 to 21697)        | 815.6 (488.8 to 1217.9) | 373 (204 to 602)                   | 22.3 (12.6 to 35.4) | 14648 (8521 to 22213)                  | 837.9 (503.5 to 1247.9) |
|              | Male   | 5 (3 to 7)             | 1 (0.6 to 1.4)      | 25 (16 to 35)             | 4.8 (3.3 to 6.8)       | 4 (3 to 6)             | 0.9 (0.6 to 1.3)    | 125 (72 to 185)              | 23.2 (14 to 33.8)        | 3 (2 to 4)                         | 0.6 (0.3 to 0.9)    | 128 (74 to 189)                        | 23.8 (14.4 to 34.5)      | 10 (7 to 15)              | 0.8 (0.5 to 1.2)    | 61 (41 to 87)                | 4.4 (3.1 to 6.1)       | 8 (5 to 12)             | 0.7 (0.5 to 1)      | 238 (152 to 356)             | 16.1 (10.4 to 23.2)     | 6 (4 to 10)                        | 0.5 (0.3 to 0.8)    | 245 (155 to 365)                       | 16.6 (10.7 to 23.9)     |
| Cook Islands | Both   | 5 (4 to 7)             | 37.9 (29.1 to 48.9) | 43 (33 to 54)             | 302.8 (238.6 to 383.4) | 3 (2 to 3)             | 20.6 (16.1 to 26.4) | 79 (61 to 103)               | 559.7 (433.7 to 725.6)   | 3 (2 to 5)                         | 23.5 (15.2 to 34.2) | 82 (63 to 107)                         | 583.3 (450.9 to 752.2)   | 11 (8 to 14)              | 47.4 (35 to 60.8)   | 92 (73 to 113)               | 402.8 (309 to 503.7)   | 5 (4 to 6)              | 20.1 (15.9 to 24.9) | 115 (88 to 148)              | 508.1 (378 to 654.8)    | 7 (5 to 10)                        | 30.3 (19.9 to 43.6) | 122 (93 to 156)                        | 538.5 (401.4 to 692.5)  |
|              | Female | 5 (4 to 7)             | 78.2 (60 to 101.2)  | 42 (33 to 54)             | 631.2 (497 to 800.5)   | 3 (2 to 3)             | 41.6 (32.4 to 53.3) | 78 (60 to 102)               | 1161.7 (895.1 to 1513.1) | 3 (2 to 5)                         | 48.7 (31.4 to 70.9) | 82 (63 to 106)                         | 1210.4 (932.1 to 1567.3) | 11 (8 to 14)              | 90.9 (67.4 to 117)  | 91 (73 to 112)               | 776.6 (596.8 to 970)   | 5 (4 to 6)              | 38.2 (30.2 to 47.5) | 976 (727.9 to 1255.9)        | 7 (5 to 10)             | 58.3 (38.4 to 83.8)                | 121 (93 to 155)     | 1034.3 (773.3 to 1329.8)               |                         |

|                                       |        | 1990                |                     |                        |                        |                     |                     |                           |                        |                                    |                     |                                        |                        | 2019                |                       |                        |                          |                     |                     |                           |                        |                                    |                      |                                        |                        |
|---------------------------------------|--------|---------------------|---------------------|------------------------|------------------------|---------------------|---------------------|---------------------------|------------------------|------------------------------------|---------------------|----------------------------------------|------------------------|---------------------|-----------------------|------------------------|--------------------------|---------------------|---------------------|---------------------------|------------------------|------------------------------------|----------------------|----------------------------------------|------------------------|
|                                       |        | Incidence           |                     | Prevalence             |                        | Deaths              |                     | YLLs (Years of Life Lost) |                        | YLDs (Years Lived with Disability) |                     | DALYs (Disability-Adjusted Life Years) |                        | Incidence           |                       | Prevalence             |                          | Deaths              |                     | YLLs (Years of Life Lost) |                        | YLDs (Years Lived with Disability) |                      | DALYs (Disability-Adjusted Life Years) |                        |
| Location                              | Sex    | Number              | Rate                | Number                 | Rate                   | Number              | Rate                | Number                    | Rate                   | Number                             | Rate                | Number                                 | Rate                   | Number              | Rate                  | Number                 | Rate                     | Number              | Rate                | Number                    | Rate                   | Number                             | Rate                 | Number                                 | Rate                   |
|                                       | Male   | 0 (0 to 0)          | 0.7 (0.4 to 1)      | 0 (0 to 0)             | 4.5 (3.2 to 6.6)       | 0 (0 to 0)          | 0.5 (0.3 to 0.7)    | 1 (0 to 1)                | 10.2 (6.7 to 15.4)     | 0 (0 to 0)                         | 0.5 (0.3 to 0.8)    | 1 (0 to 1)                             | 10.6 (7 to 16)         | 0 (0 to 0)          | 0.6 (0.4 to 0.8)      | 1 (0 to 1)             | 4.6 (3.5 to 6.1)         | 0 (0 to 0)          | 0.3 (0.2 to 0.4)    | 1 (1 to 1)                | 7.3 (5.4 to 9.7)       | 0 (0 to 0)                         | 0.4 (0.3 to 0.7)     | 1 (1 to 1)                             | 7.7 (5.7 to 10.3)      |
| Costa Rica                            | Both   | 382 (351 to 414)    | 20 (18.4 to 21.6)   | 3184 (2925 to 3465)    | 166 (152.7 to 180.3)   | 140 (131 to 149)    | 7.7 (7.2 to 8.2)    | 4211 (3952 to 4485)       | 214 (200.7 to 227.6)   | 229 (164 to 312)                   | 11.9 (8.5 to 16.1)  | 4440 (4152 to 4751)                    | 225.9 (211 to 241.3)   | 1514 (1159 to 1926) | 29.1 (22.4 to 37)     | 13057 (10269 to 16350) | 251.3 (197.6 to 314.1)   | 438 (345 to 551)    | 8.5 (6.6 to 10.6)   | 11240 (8661 to 14421)     | 215 (166.1 to 275.4)   | 917 (603 to 1331)                  | 17.7 (11.6 to 25.7)  | 12157 (9401 to 15609)                  | 232.6 (180 to 298.7)   |
|                                       | Female | 376 (346 to 408)    | 38.5 (35.3 to 41.6) | 3147 (2891 to 3424)    | 321.4 (295.7 to 349.8) | 136 (127 to 145)    | 14.6 (13.5 to 15.5) | 4123 (3867 to 4397)       | 410.8 (385.2 to 437.2) | 226 (161 to 307)                   | 22.9 (16.3 to 31.1) | 4349 (4065 to 4658)                    | 433.8 (404.9 to 463.7) | 1505 (1153 to 1915) | 54.2 (41.5 to 68.9)   | 12994 (10217 to 16270) | 468.6 (367.8 to 586.5)   | 434 (339 to 545)    | 15.5 (12.1 to 19.5) | 11139 (8571 to 14290)     | 399.7 (307.9 to 512.6) | 911 (599 to 1322)                  | 32.9 (21.6 to 47.8)  | 12050 (9317 to 15485)                  | 432.5 (334.6 to 556.6) |
|                                       | Male   | 6 (5 to 7)          | 0.7 (0.6 to 0.8)    | 37 (32 to 44)          | 4.2 (3.5 to 5)         | 4 (3 to 4)          | 0.5 (0.4 to 0.5)    | 87 (77 to 98)             | 9.9 (8.7 to 11)        | 4 (3 to 5)                         | 0.4 (0.3 to 0.6)    | 91 (81 to 102)                         | 10.3 (9 to 11.6)       | 9 (6 to 12)         | 0.4 (0.3 to 0.5)      | 63 (45 to 86)          | 2.6 (1.9 to 3.6)         | 5 (3 to 6)          | 0.2 (0.1 to 0.3)    | 101 (73 to 135)           | 4.2 (3.1 to 5.7)       | 6 (4 to 9)                         | 0.3 (0.2 to 0.4)     | 107 (78 to 143)                        | 4.5 (3.3 to 6)         |
| Croatia                               | Both   | 2234 (2033 to 2439) | 36 (32.9 to 39.3)   | 21131 (19197 to 23181) | 336.5 (305.8 to 368.8) | 894 (826 to 968)    | 14.7 (13.6 to 15.9) | 22971 (21177 to 24904)    | 367.4 (339.1 to 397.8) | 1520 (1068 to 2035)                | 24.3 (17.1 to 32.6) | 24491 (22666 to 26514)                 | 391.8 (362.3 to 424.7) | 2865 (2214 to 3646) | 37.3 (28.6 to 47.9)   | 27552 (22734 to 33601) | 356.9 (290.9 to 443.1)   | 1001 (785 to 1234)  | 11.6 (9.1 to 14.3)  | 19851 (15235 to 25057)    | 258.9 (197.8 to 330.2) | 1953 (1289 to 2744)                | 25.5 (16.5 to 36.4)  | 21804 (16915 to 27534)                 | 284.4 (219.3 to 361.5) |
|                                       | Female | 2211 (2007 to 2415) | 64.2 (58.4 to 70.4) | 20931 (19019 to 22994) | 598.9 (544.8 to 657.4) | 885 (817 to 958)    | 24.8 (22.9 to 26.8) | 22737 (20949 to 24682)    | 660.4 (610.3 to 716.2) | 1502 (1055 to 2011)                | 43.4 (30.4 to 58.5) | 24239 (22428 to 26275)                 | 703.9 (649.9 to 763.9) | 2824 (2182 to 3588) | 68.3 (52 to 88.3)     | 27196 (22470 to 33143) | 656 (531.6 to 822.3)     | 987 (774 to 1215)   | 20 (15.5 to 24.9)   | 19570 (15041 to 24726)    | 474.5 (361.4 to 606.2) | 1922 (1268 to 2696)                | 46.8 (30.2 to 67.5)  | 21492 (16652 to 27067)                 | 521.3 (401.3 to 664.8) |
|                                       | Male   | 23 (19 to 29)       | 0.9 (0.7 to 1.1)    | 200 (164 to 247)       | 7.5 (6.2 to 9.2)       | 9 (8 to 11)         | 0.4 (0.3 to 0.5)    | 234 (198 to 277)          | 8.6 (7.4 to 10.1)      | 18 (12 to 26)                      | 0.7 (0.5 to 1)      | 252 (214 to 298)                       | 9.3 (7.9 to 11)        | 41 (28 to 56)       | 1.1 (0.8 to 1.6)      | 355 (261 to 475)       | 9.9 (7.3 to 13.2)        | 14 (10 to 18)       | 0.4 (0.3 to 0.5)    | 281 (204 to 368)          | 7.9 (5.8 to 10.4)      | 32 (20 to 48)                      | 0.9 (0.6 to 1.3)     | 312 (228 to 411)                       | 8.8 (6.4 to 11.5)      |
| Cuba                                  | Both   | 2619 (2461 to 2790) | 25.5 (23.9 to 27.1) | 22260 (20779 to 23879) | 215.9 (201.5 to 231.6) | 1020 (973 to 1064)  | 10.1 (9.6 to 10.5)  | 28110 (26958 to 29388)    | 272.9 (261.7 to 285.4) | 1594 (1135 to 2136)                | 15.4 (11 to 20.7)   | 29705 (28350 to 31226)                 | 288.4 (275.1 to 303.2) | 5590 (4479 to 6915) | 31.1 (25 to 38.6)     | 48482 (40065 to 58836) | 270.9 (223 to 330.2)     | 1776 (1460 to 2163) | 9.4 (7.7 to 11.5)   | 41352 (33455 to 51181)    | 233.1 (188.5 to 287.6) | 3425 (2334 to 4759)                | 19.2 (12.9 to 26.7)  | 44777 (35928 to 55471)                 | 252.3 (202.2 to 311.6) |
|                                       | Female | 2587 (2430 to 2757) | 49.7 (46.6 to 53)   | 22064 (20591 to 23668) | 423.4 (394.8 to 454.3) | 997 (950 to 1041)   | 19.4 (18.4 to 20.2) | 27679 (26511 to 28950)    | 532 (509.8 to 556.4)   | 1575 (1119 to 2108)                | 30.2 (21.5 to 40.4) | 29253 (27913 to 30762)                 | 562.1 (536.1 to 591.3) | 5543 (4447 to 6852) | 59.4 (47.6 to 73.7)   | 48153 (39835 to 58409) | 518.3 (426.6 to 632.5)   | 1750 (1438 to 2129) | 17.5 (14.4 to 21.4) | 40855 (33004 to 50535)    | 445 (358.9 to 550.3)   | 3394 (2316 to 4716)                | 36.6 (24.5 to 51.1)  | 44249 (35534 to 54782)                 | 481.6 (385.5 to 596.5) |
|                                       | Male   | 32 (27 to 37)       | 0.6 (0.5 to 0.8)    | 196 (165 to 230)       | 3.9 (3.2 to 4.5)       | 22 (19 to 26)       | 0.5 (0.4 to 0.5)    | 432 (374 to 493)          | 8.6 (7.4 to 9.8)       | 20 (13 to 27)                      | 0.4 (0.3 to 0.5)    | 451 (391 to 516)                       | 9 (7.8 to 10.3)        | 47 (34 to 62)       | 0.5 (0.4 to 0.7)      | 329 (244 to 428)       | 3.8 (2.8 to 4.9)         | 26 (19 to 34)       | 0.3 (0.2 to 0.4)    | 497 (370 to 646)          | 5.7 (4.2 to 7.4)       | 31 (20 to 47)                      | 0.4 (0.2 to 0.5)     | 528 (394 to 686)                       | 6 (4.5 to 7.8)         |
| Cyprus                                | Both   | 268 (231 to 315)    | 33.5 (29 to 39.3)   | 3054 (2642 to 3552)    | 374.3 (326.2 to 434.1) | 106 (92 to 123)     | 13.8 (12 to 16)     | 2753 (2356 to 3215)       | 343.2 (295.2 to 401.7) | 207 (143 to 288)                   | 25.5 (17.7 to 35.4) | 2961 (2538 to 3457)                    | 368.8 (316.5 to 429.6) | 985 (816 to 1185)   | 53.8 (44.6 to 64.5)   | 10309 (8903 to 11988)  | 557.6 (481.7 to 648.6)   | 221 (191 to 252)    | 12.2 (10.6 to 13.9) | 5018 (4310 to 5808)       | 275.1 (236.8 to 318.1) | 739 (496 to 1043)                  | 40.1 (26.8 to 56.5)  | 5757 (4911 to 6733)                    | 315.2 (268.2 to 368.2) |
|                                       | Female | 261 (223 to 307)    | 62.5 (53.9 to 73.5) | 2993 (2583 to 3483)    | 702.8 (612.4 to 815)   | 102 (88 to 119)     | 25.5 (21.9 to 29.6) | 2659 (2267 to 3110)       | 638.5 (547.1 to 748.3) | 202 (139 to 282)                   | 47.7 (32.8 to 66.3) | 2860 (2447 to 3335)                    | 686.2 (588.2 to 800.9) | 975 (806 to 1174)   | 101.3 (83.6 to 122.2) | 10206 (8805 to 11891)  | 1051.8 (904.5 to 1228.2) | 217 (188 to 249)    | 22.1 (19.2 to 25.3) | 4953 (4256 to 5746)       | 516.6 (443.4 to 600.6) | 730 (488 to 1033)                  | 75.6 (50.4 to 107.7) | 5683 (4840 to 6650)                    | 592.2 (502.3 to 694.1) |
|                                       | Male   | 8 (5 to 11)         | 2.1 (1.4 to 2.9)    | 61 (43 to 83)          | 16.2 (11.6 to 21.7)    | 4 (3 to 6)          | 1.2 (0.8 to 1.6)    | 95 (66 to 129)            | 25.2 (17.7 to 34.1)    | 6 (3 to 9)                         | 1.5 (0.9 to 2.3)    | 100 (71 to 136)                        | 26.7 (18.8 to 36.2)    | 10 (7 to 15)        | 1.1 (0.8 to 1.6)      | 104 (77 to 138)        | 11.6 (8.8 to 15.2)       | 3 (2 to 4)          | 0.4 (0.3 to 0.5)    | 65 (47 to 89)             | 7.2 (5.4 to 9.9)       | 9 (5 to 14)                        | 1 (0.6 to 1.5)       | 73 (54 to 99)                          | 8.2 (6.1 to 11)        |
| Czechia                               | Both   | 4422 (4179 to 4685) | 33.6 (31.8 to 35.6) | 41637 (38360 to 45811) | 314.8 (291 to 344.1)   | 1911 (1828 to 1983) | 14.3 (13.7 to 14.9) | 46706 (44985 to 48369)    | 356.6 (343.9 to 369.3) | 2985 (2071 to 3997)                | 22.6 (15.8 to 30.3) | 49691 (47558 to 51856)                 | 379.3 (363.4 to 395.4) | 5748 (4615 to 7085) | 31 (24.8 to 38.3)     | 59269 (50445 to 70155) | 313.7 (264.4 to 372.5)   | 1904 (1556 to 2285) | 9.2 (7.6 to 11.1)   | 38548 (31436 to 46647)    | 206.6 (168.2 to 253.1) | 4033 (2755 to 5714)                | 21.7 (14.8 to 30.9)  | 42582 (34701 to 51934)                 | 228.2 (184.7 to 279.5) |
|                                       | Female | 4398 (4157 to 4661) | 60.4 (57.1 to 64.2) | 41431 (38169 to 45569) | 565.6 (523.2 to 616)   | 1900 (1818 to 1972) | 24.4 (23.4 to 25.3) | 46454 (44751 to 48109)    | 644.8 (621.5 to 667.4) | 2966 (2058 to 3969)                | 40.8 (28.3 to 54.6) | 49420 (47298 to 51590)                 | 685.6 (657.7 to 715.7) | 5700 (4571 to 7023) | 58.3 (46.6 to 72.3)   | 58833 (50051 to 69624) | 589.1 (494.6 to 702.4)   | 1888 (1544 to 2266) | 16.3 (13.3 to 19.7) | 38215 (31171 to 46239)    | 387.5 (314.8 to 477.2) | 3994 (2727 to 5666)                | 40.8 (27.6 to 58.4)  | 42210 (34331 to 51506)                 | 428.3 (345.8 to 526.6) |
|                                       | Male   | 24 (20 to 28)       | 0.4 (0.4 to 0.5)    | 206 (174 to 245)       | 3.7 (3.2 to 4.4)       | 11 (9 to 12)        | 0.2 (0.2 to 0.2)    | 252 (221 to 288)          | 4.5 (4 to 5.1)         | 19 (13 to 27)                      | 0.3 (0.2 to 0.5)    | 272 (238 to 308)                       | 4.9 (4.3 to 5.5)       | 48 (33 to 64)       | 0.5 (0.4 to 0.7)      | 436 (324 to 562)       | 4.9 (3.7 to 6.2)         | 16 (12 to 21)       | 0.2 (0.1 to 0.2)    | 333 (246 to 432)          | 3.8 (2.9 to 4.9)       | 39 (24 to 58)                      | 0.4 (0.3 to 0.6)     | 372 (276 to 480)                       | 4.3 (3.2 to 5.5)       |
| Democratic People's Republic of Korea | Both   | 2185 (1539 to 3060) | 11.6 (8.3 to 15.9)  | 19735 (15026 to 26141) | 108.2 (84.9 to 140.5)  | 1151 (824 to 1593)  | 6.6 (4.8 to 8.8)    | 38185 (26823 to 54083)    | 198.6 (141.1 to 278)   | 1446 (857 to 2241)                 | 7.7 (4.7 to 11.7)   | 39632 (27993 to 56270)                 | 206.3 (146.6 to 288.9) | 4718 (3329 to 6521) | 14.2 (10.1 to 19.6)   | 41190 (30701 to 54201) | 124 (92.9 to 162.6)      | 2384 (1761 to 3161) | 7.3 (5.5 to 9.6)    | 72591 (51252 to 99903)    | 215.8 (151.4 to 298.5) | 3064 (1896 to 4688)                | 9.2 (5.7 to 14)      | 75655 (53147 to 103855)                | 225 (158.5 to 310.2)   |

|                                  |        | 1990                   |                         |                           |                            |                        |                        |                           |                            |                                    |                        |                                        |                              | 2019                   |                         |                           |                            |                        |                        |                              |                           |                                    |                        |                                        |                            |
|----------------------------------|--------|------------------------|-------------------------|---------------------------|----------------------------|------------------------|------------------------|---------------------------|----------------------------|------------------------------------|------------------------|----------------------------------------|------------------------------|------------------------|-------------------------|---------------------------|----------------------------|------------------------|------------------------|------------------------------|---------------------------|------------------------------------|------------------------|----------------------------------------|----------------------------|
|                                  |        | Incidence              |                         | Prevalence                |                            | Deaths                 |                        | YLLs (Years of Life Lost) |                            | YLDs (Years Lived with Disability) |                        | DALYs (Disability-Adjusted Life Years) |                              | Incidence              |                         | Prevalence                |                            | Deaths                 |                        | YLLs (Years of Life Lost)    |                           | YLDs (Years Lived with Disability) |                        | DALYs (Disability-Adjusted Life Years) |                            |
| Location                         | Sex    | Number                 | Rate                    | Number                    | Rate                       | Number                 | Rate                   | Number                    | Rate                       | Number                             | Rate                   | Number                                 | Rate                         | Number                 | Rate                    | Number                    | Rate                       | Number                 | Rate                   | Number                       | Rate                      | Number                             | Rate                   | Number                                 | Rate                       |
|                                  | Female | 2166<br>(1522 to 3033) | 20.3<br>(14.3 to 28.3)  | 19609<br>(14914 to 25990) | 186.4<br>(143.2 to 244.7)  | 1139<br>(813 to 1578)  | 11 (8 to 15)           | 37806<br>(26524 to 53468) | 350.8<br>(247.3 to 491.3)  | 1433<br>(848 to 2225)              | 13.5<br>(8.1 to 20.7)  | 39239<br>(27704 to 55682)              | 364.3<br>(257.5 to 512.3)    | 4658<br>(3268 to 6447) | 26.6<br>(18.5 to 37.1)  | 40801<br>(30359 to 53795) | 231.7<br>(169.8 to 309.7)  | 2347<br>(1726 to 3126) | 13 (9.5 to 17.4)       | 71507<br>(49968 to 98653)    | 409.3<br>(282.5 to 572.4) | 3023<br>(1863 to 4635)             | 17.3<br>(10.5 to 26.6) | 74530<br>(52142 to 102531)             | 426.6<br>(293 to 595.1)    |
|                                  | Male   | 19 (12 to 30)          | 0.3 (0.2 to 0.4)        | 126 (81 to 197)           | 1.7 (1.1 to 2.5)           | 12 (8 to 18)           | 0.2 (0.1 to 0.3)       | 380<br>(243 to 578)       | 5 (3.3 to 7.3)             | 13 (7 to 22)                       | 0.2 (0.1 to 0.3)       | 393<br>(251 to 597)                    | 5.2 (3.4 to 7.6)             | 61 (40 to 89)          | 0.4 (0.3 to 0.6)        | 389<br>(253 to 581)       | 2.6 (1.7 to 3.8)           | 37 (24 to 54)          | 0.3 (0.2 to 0.4)       | 1085<br>(699 to 1621)        | 7.2 (4.7 to 10.3)         | 41 (23 to 64)                      | 0.3 (0.2 to 0.4)       | 1125<br>(725 to 1689)                  | 7.4 (4.9 to 10.7)          |
| Democratic Republic of the Congo | Both   | 2092<br>(1617 to 2704) | 11.6<br>(9.1 to 14.6)   | 13635<br>(10994 to 16959) | 72.8<br>(59.4 to 89.1)     | 1635<br>(1260 to 2094) | 9.9 (7.7 to 12.3)      | 55204<br>(41977 to 71921) | 278.2<br>(214.2 to 357.9)  | 1158<br>(757 to 1638)              | 6.2 (4.1 to 8.6)       | 56362<br>(43119 to 73403)              | 284.3<br>(217.9 to 366.3)    | 6528<br>(4644 to 8824) | 16 (11.4 to 21.8)       | 42883<br>(31967 to 55497) | 98.9<br>(74.7 to 126.8)    | 4704<br>(3342 to 6355) | 12.9<br>(9.2 to 17.5)  | 151887<br>(106712 to 203037) | 334.4<br>(237.6 to 451)   | 3644<br>(2276 to 5515)             | 8.5 (5.3 to 12.7)      | 155532<br>(109555 to 207861)           | 342.9<br>(244.4 to 462)    |
|                                  | Female | 2038<br>(1568 to 2609) | 21.1<br>(16.7 to 26.6)  | 13344<br>(10727 to 16477) | 133.5<br>(108.9 to 162.9)  | 1588<br>(1220 to 2027) | 18 (14.1 to 22.3)      | 53841<br>(40797 to 70144) | 506.9<br>(388.6 to 648.9)  | 1126<br>(735 to 1592)              | 11.3<br>(7.5 to 15.6)  | 54967<br>(41764 to 71736)              | 518.2<br>(397 to 665.3)      | 6415<br>(4506 to 8717) | 28.8<br>(20.2 to 39.5)  | 42216<br>(31440 to 54799) | 181.2<br>(136.2 to 234.6)  | 4612<br>(3262 to 6237) | 22.5<br>(15.8 to 30.6) | 149092<br>(104824 to 200062) | 617.3<br>(436.8 to 835.8) | 3574<br>(2227 to 5394)             | 15.4<br>(9.6 to 23.1)  | 152667<br>(107284 to 205032)           | 632.8<br>(449.5 to 857.1)  |
|                                  | Male   | 54 (31 to 118)         | 0.7 (0.4 to 1.6)        | 291<br>(181 to 564)       | 3.8 (2.4 to 7.2)           | 47 (28 to 104)         | 0.7 (0.4 to 1.6)       | 1364<br>(785 to 2925)     | 16.6<br>(9.6 to 36.6)      | 32 (16 to 64)                      | 0.4 (0.2 to 0.9)       | 1396<br>(810 to 2984)                  | 17 (9.9 to 37.4)             | 113 (61 to 257)        | 0.7 (0.4 to 1.6)        | 668<br>(403 to 1364)      | 3.8 (2.4 to 7.5)           | 92 (50 to 212)         | 0.6 (0.3 to 1.5)       | 2795<br>(1534 to 6245)       | 14.5<br>(7.9 to 33.5)     | 70 (35 to 148)                     | 0.4 (0.2 to 0.9)       | 2865<br>(1574 to 6406)                 | 14.9<br>(8.1 to 34.5)      |
| Denmark                          | Both   | 3634<br>(3460 to 3816) | 50.8<br>(48.3 to 53.3)  | 36254<br>(33118 to 40022) | 498.2<br>(456.9 to 543.6)  | 1667<br>(1590 to 1733) | 21.9<br>(20.9 to 22.7) | 39551<br>(38112 to 41002) | 565.3<br>(545 to 585.4)    | 2601<br>(1831 to 3536)             | 36.2<br>(25.5 to 49.3) | 42152<br>(40434 to 43969)              | 601.5<br>(578.1 to 627.6)    | 4290<br>(3313 to 5449) | 43.7<br>(33.5 to 56.1)  | 46716<br>(39169 to 56034) | 463.5<br>(383 to 566.6)    | 1399<br>(1243 to 1543) | 12.3 (11 to 13.5)      | 27222<br>(24693 to 29536)    | 273.9<br>(250.7 to 296.9) | 3228<br>(2163 to 4651)             | 32.7<br>(21.6 to 47.6) | 30451<br>(27299 to 33847)              | 306.6<br>(275.7 to 339.8)  |
|                                  | Female | 3616<br>(3444 to 3797) | 95.6<br>(90.8 to 100.5) | 36089<br>(32958 to 39858) | 932.2<br>(855.4 to 1015.3) | 1659<br>(1581 to 1724) | 39.5<br>(37.9 to 41)   | 39370<br>(37921 to 40828) | 1073.9<br>(1035 to 1112.9) | 2586<br>(1820 to 3518)             | 68.2<br>(47.8 to 93)   | 41955<br>(40237 to 43783)              | 1142.1<br>(1097.3 to 1191.5) | 4266<br>(3293 to 5419) | 84.5<br>(64.6 to 108.7) | 46470<br>(38962 to 55742) | 893.7<br>(736.5 to 1089.8) | 1391<br>(1235 to 1536) | 22.8<br>(20.5 to 24.9) | 27070<br>(24560 to 29388)    | 528<br>(483.5 to 572.9)   | 3207<br>(2151 to 4623)             | 63.2<br>(41.8 to 92.5) | 30277<br>(27127 to 33655)              | 591.2<br>(531.7 to 655.7)  |
|                                  | Male   | 18 (15 to 22)          | 0.5 (0.5 to 0.6)        | 165<br>(139 to 198)       | 4.9 (4.2 to 5.9)           | 8 (7 to 10)            | 0.3 (0.2 to 0.3)       | 181<br>(162 to 205)       | 5.5 (4.9 to 6.2)           | 15 (10 to 22)                      | 0.4 (0.3 to 0.6)       | 196<br>(175 to 222)                    | 5.9 (5.3 to 6.7)             | 24 (17 to 34)          | 0.5 (0.3 to 0.7)        | 246<br>(188 to 325)       | 4.9 (3.8 to 6.3)           | 8 (6 to 10)            | 0.2 (0.1 to 0.2)       | 153<br>(124 to 185)          | 3.2 (2.7 to 3.8)          | 21 (13 to 33)                      | 0.4 (0.3 to 0.6)       | 174<br>(141 to 213)                    | 3.6 (3 to 4.4)             |
| Djibouti                         | Both   | 16 (10 to 22)          | 9.4 (6.2 to 12.6)       | 107 (74 to 142)           | 60 (44.1 to 76.9)          | 12 (8 to 16)           | 8.1 (5.4 to 10.8)      | 412<br>(259 to 577)       | 209.2<br>(134.3 to 286.2)  | 9 (5 to 14)                        | 5.1 (3.1 to 7.5)       | 421<br>(265 to 589)                    | 214.4<br>(139.3 to 293.2)    | 100 (66 to 145)        | 14.2<br>(10.2 to 19.4)  | 698<br>(466 to 992)       | 91.9<br>(66.6 to 123.8)    | 65 (44 to 92)          | 10.7<br>(8.1 to 14.3)  | 2125<br>(1348 to 3140)       | 267.3<br>(183.2 to 374.3) | 59 (34 to 91)                      | 7.9 (4.9 to 11.8)      | 2184<br>(1389 to 3216)                 | 275.2<br>(188.5 to 385.5)  |
|                                  | Female | 15 (9 to 20)           | 16.8<br>(10.9 to 22.9)  | 100 (69 to 133)           | 112.4<br>(82.2 to 144.9)   | 11 (7 to 15)           | 13.9<br>(9.2 to 18.6)  | 382<br>(239 to 536)       | 389.4<br>(252.3 to 535.8)  | 8 (5 to 13)                        | 9.3 (5.6 to 13.7)      | 390<br>(245 to 547)                    | 398.7<br>(259 to 547.5)      | 94 (60 to 137)         | 27.6 (19 to 37.8)       | 662<br>(439 to 942)       | 185.3<br>(131.8 to 250.7)  | 60 (40 to 85)          | 20 (14.6 to 27.1)      | 1992<br>(1246 to 2957)       | 529.9<br>(353.4 to 754.4) | 55 (31 to 86)                      | 15.5<br>(9.4 to 23.3)  | 2048<br>(1280 to 3025)                 | 545.4<br>(365 to 772)      |
|                                  | Male   | 1 (1 to 2)             | 2.3 (1.3 to 3.9)        | 7 (4 to 11)               | 10.4<br>(6.4 to 16.9)      | 1 (1 to 2)             | 2.4 (1.4 to 4)         | 30 (16 to 53)             | 44.2<br>(23.6 to 77.1)     | 1 (0 to 1)                         | 1.2 (0.6 to 2)         | 31 (16 to 54)                          | 45.4<br>(24.3 to 79.3)       | 7 (3 to 12)            | 2.5 (1.3 to 4.4)        | 36 (20 to 63)             | 12.3<br>(7.3 to 20.5)      | 5 (3 to 10)            | 2.3 (1.3 to 4.1)       | 133 (67 to 244)              | 43.1<br>(22.1 to 77.5)    | 4 (2 to 7)                         | 1.3 (0.6 to 2.5)       | 136 (69 to 250)                        | 44.5<br>(22.9 to 79.4)     |
| Dominica                         | Both   | 20 (18 to 23)          | 31.8 (27 to 36.6)       | 161<br>(140 to 184)       | 252.3<br>(217 to 291)      | 11 (9 to 12)           | 16.3 (14 to 18.5)      | 271<br>(231 to 313)       | 435.8<br>(369.7 to 506.7)  | 12 (8 to 16)                       | 18.5<br>(12.9 to 25.3) | 283<br>(240 to 326)                    | 454.3<br>(385.6 to 526.8)    | 28 (23 to 35)          | 33 (26.3 to 41.4)       | 220<br>(180 to 272)       | 258.8<br>(211 to 321.1)    | 14 (12 to 17)          | 16.1<br>(13.2 to 19.8) | 346<br>(274 to 436)          | 412.4<br>(324 to 523.5)   | 16 (11 to 23)                      | 19.1<br>(12.8 to 27)   | 362<br>(287 to 457)                    | 431.5<br>(341 to 547.5)    |
|                                  | Female | 20 (17 to 23)          | 56.6 (48 to 65.2)       | 160<br>(139 to 183)       | 452.4<br>(387.3 to 521.5)  | 11 (9 to 12)           | 28 (24 to 31.9)        | 268<br>(228 to 309)       | 785.7<br>(666.2 to 919.3)  | 12 (8 to 16)                       | 33.1<br>(23.2 to 45.3) | 279<br>(237 to 322)                    | 818.8<br>(694.2 to 954.4)    | 28 (22 to 35)          | 65.4 (52 to 82.4)       | 218<br>(179 to 270)       | 520.2<br>(422 to 646.4)    | 14 (11 to 17)          | 30.8<br>(25.1 to 38.4) | 341<br>(271 to 431)          | 824.4<br>(645.5 to 1047)  | 16 (11 to 23)                      | 38.1<br>(25.5 to 54.3) | 357<br>(283 to 452)                    | 862.5<br>(678.5 to 1098.3) |
|                                  | Male   | 0 (0 to 0)             | 0.7 (0.6 to 0.9)        | 1 (1 to 2)                | 4.1 (3.4 to 5.1)           | 0 (0 to 0)             | 0.5 (0.4 to 0.7)       | 3 (3 to 4)                | 11.2<br>(9.1 to 13.8)      | 0 (0 to 0)                         | 0.4 (0.3 to 0.6)       | 3 (3 to 4)                             | 11.6<br>(9.4 to 14.2)        | 0 (0 to 0)             | 0.7 (0.5 to 0.9)        | 2 (1 to 2)                | 4.2 (3.2 to 5.6)           | 0 (0 to 0)             | 0.5 (0.4 to 0.7)       | 5 (3 to 6)                   | 10.5<br>(7.5 to 14.1)     | 0 (0 to 0)                         | 0.4 (0.3 to 0.6)       | 5 (3 to 6)                             | 10.9<br>(7.9 to 14.7)      |
| Dominican Republic               | Both   | 397<br>(342 to 458)    | 9.3 (8.1 to 10.6)       | 3362<br>(2944 to 3840)    | 79.3<br>(69.3 to 90.1)     | 224<br>(196 to 254)    | 5.7 (5 to 6.5)         | 7448<br>(6463 to 8527)    | 165.2<br>(143.1 to 188.1)  | 240<br>(164 to 330)                | 5.6 (3.8 to 7.6)       | 7688<br>(6638 to 8808)                 | 170.8<br>(147.4 to 194.7)    | 1850<br>(1321 to 2499) | 18.6<br>(13.4 to 25)    | 15281<br>(11292 to 20161) | 153.1<br>(114.5 to 200.6)  | 798<br>(590 to 1044)   | 8.4 (6.3 to 10.9)      | 23934<br>(16968 to 32280)    | 236.5<br>(168.9 to 317.5) | 1103<br>(698 to 1655)              | 11 (7 to 16.5)         | 25037<br>(17808 to 33618)              | 247.6<br>(177.5 to 330.7)  |

|                   |        | 1990                   |                        |                           |                           |                        |                       |                           |                           |                                    |                       |                                        |                           | 2019                     |                        |                            |                           |                        |                        |                              |                           |                                    |                        |                                        |                            |
|-------------------|--------|------------------------|------------------------|---------------------------|---------------------------|------------------------|-----------------------|---------------------------|---------------------------|------------------------------------|-----------------------|----------------------------------------|---------------------------|--------------------------|------------------------|----------------------------|---------------------------|------------------------|------------------------|------------------------------|---------------------------|------------------------------------|------------------------|----------------------------------------|----------------------------|
|                   |        | Incidence              |                        | Prevalence                |                           | Deaths                 |                       | YLLs (Years of Life Lost) |                           | YLDs (Years Lived with Disability) |                       | DALYs (Disability-Adjusted Life Years) |                           | Incidence                |                        | Prevalence                 |                           | Deaths                 |                        | YLLs (Years of Life Lost)    |                           | YLDs (Years Lived with Disability) |                        | DALYs (Disability-Adjusted Life Years) |                            |
| Location          | Sex    | Number                 | Rate                   | Number                    | Rate                      | Number                 | Rate                  | Number                    | Rate                      | Number                             | Rate                  | Number                                 | Rate                      | Number                   | Rate                   | Number                     | Rate                      | Number                 | Rate                   | Number                       | Rate                      | Number                             | Rate                   | Number                                 | Rate                       |
|                   | Female | 392<br>(337 to 451)    | 18 (15.6 to 20.6)      | 3330<br>(2914 to 3804)    | 154.4<br>(135 to 175.5)   | 220<br>(192 to 250)    | 11 (9.6 to 12.4)      | 7335<br>(6353 to 8411)    | 318.8<br>(275.6 to 364)   | 237<br>(162 to 326)                | 10.8<br>(7.4 to 14.7) | 7572<br>(6538 to 8680)                 | 329.7<br>(284.4 to 375.8) | 1826<br>(1302 to 2460)   | 36.1<br>(25.9 to 48.4) | 15132<br>(11178 to 19930)  | 298.6<br>(222.8 to 391)   | 782<br>(577 to 1024)   | 15.9<br>(11.8 to 20.8) | 23535<br>(16675 to 31778)    | 459.7<br>(326.8 to 618.1) | 1088<br>(690 to 1633)              | 21.4<br>(13.6 to 32)   | 24623<br>(17539 to 33003)              | 481.1<br>(344.5 to 643.5)  |
|                   | Male   | 5 (4 to 7)             | 0.3 (0.2 to 0.4)       | 33 (26 to 41)             | 1.7 (1.3 to 2.1)          | 4 (3 to 5)             | 0.3 (0.2 to 0.3)      | 113 (87 to 144)           | 5.6 (4.3 to 7.1)          | 3 (2 to 4)                         | 0.2 (0.1 to 0.2)      | 116 (90 to 149)                        | 5.7 (4.5 to 7.3)          | 24 (13 to 38)            | 0.5 (0.3 to 0.8)       | 149 (87 to 236)            | 3.2 (1.9 to 5)            | 16 (9 to 25)           | 0.4 (0.2 to 0.6)       | 399<br>(221 to 649)          | 8.5 (4.7 to 13.6)         | 15 (8 to 25)                       | 0.3 (0.2 to 0.5)       | 414<br>(230 to 671)                    | 8.8 (4.9 to 14)            |
| Ecuador           | Both   | 473<br>(440 to 505)    | 7.9 (7.4 to 8.5)       | 3630<br>(3359 to 3943)    | 60.3<br>(55.8 to 65.7)    | 298<br>(279 to 318)    | 5.3 (4.9 to 5.6)      | 9483<br>(8856 to 10096)   | 151<br>(141.2 to 160.9)   | 271<br>(193 to 362)                | 4.5 (3.2 to 6)        | 9753<br>(9120 to 10389)                | 155.4<br>(145.3 to 165.7) | 2553<br>(1973 to 3323)   | 16.2<br>(12.5 to 21)   | 20845<br>(16559 to 26655)  | 130.8<br>(104.2 to 166.9) | 1044<br>(818 to 1346)  | 6.9 (5.4 to 8.8)       | 30145<br>(23127 to 39302)    | 188.1<br>(144.9 to 244.3) | 1508<br>(975 to 2175)              | 9.5 (6.2 to 13.6)      | 31654<br>(24201 to 41342)              | 197.6<br>(151.9 to 257.1)  |
|                   | Female | 463<br>(431 to 496)    | 15.3<br>(14.3 to 16.4) | 3575<br>(3309 to 3885)    | 117.6<br>(108.6 to 128.2) | 290<br>(271 to 309)    | 10.2<br>(9.5 to 10.9) | 9277<br>(8654 to 9879)    | 292.2<br>(273 to 311.4)   | 265<br>(188 to 355)                | 8.6 (6.1 to 11.6)     | 9542<br>(8915 to 10170)                | 300.8<br>(281.2 to 320.9) | 2538<br>(1961 to 3304)   | 31 (24 to 40.3)        | 20738<br>(16473 to 26532)  | 252<br>(200.6 to 322)     | 1034<br>(811 to 1333)  | 13.1<br>(10.3 to 16.7) | 29922<br>(22975 to 39044)    | 361.8<br>(278.5 to 470.5) | 1498<br>(969 to 2164)              | 18.2<br>(11.8 to 26.2) | 31420<br>(24034 to 41071)              | 380.1<br>(291.9 to 495.2)  |
|                   | Male   | 10 (8 to 11)           | 0.4 (0.3 to 0.4)       | 55 (47 to 64)             | 2 (1.7 to 2.3)            | 8 (7 to 10)            | 0.3 (0.3 to 0.4)      | 206<br>(177 to 239)       | 7.3 (6.3 to 8.6)          | 6 (4 to 8)                         | 0.2 (0.1 to 0.3)      | 212<br>(181 to 246)                    | 7.5 (6.4 to 8.8)          | 15 (10 to 22)            | 0.2 (0.1 to 0.3)       | 107 (77 to 151)            | 1.4 (1 to 2)              | 10 (7 to 14)           | 0.1 (0.1 to 0.2)       | 223<br>(157 to 321)          | 3 (2.1 to 4.3)            | 10 (6 to 15)                       | 0.1 (0.1 to 0.2)       | 233<br>(164 to 334)                    | 3.1 (2.2 to 4.4)           |
| Egypt             | Both   | 2519<br>(2294 to 2759) | 7.1 (6.5 to 7.7)       | 23693<br>(21100 to 26603) | 70.4<br>(62.9 to 80)      | 1588<br>(1457 to 1730) | 4.8 (4.4 to 5.2)      | 55624<br>(50598 to 61008) | 149.5<br>(136.9 to 163.3) | 1685<br>(1165 to 2327)             | 4.8 (3.3 to 6.6)      | 57309<br>(52073 to 62758)              | 154.3<br>(141.2 to 168.2) | 10637<br>(7384 to 14572) | 13.6<br>(9.4 to 18.6)  | 93577<br>(69435 to 123123) | 121.6<br>(91.8 to 157.8)  | 4672<br>(3173 to 6369) | 6.4 (4.4 to 8.7)       | 156733<br>(108406 to 216177) | 195.7<br>(134.2 to 267.5) | 7009<br>(4271 to 10483)            | 9 (5.5 to 13.2)        | 163742<br>(113133 to 224191)           | 204.7<br>(140.4 to 278.8)  |
|                   | Female | 2509<br>(2285 to 2749) | 14.2 (13 to 15.5)      | 23599<br>(21009 to 26486) | 140.8<br>(125.7 to 159.8) | 1581<br>(1450 to 1723) | 9.6 (8.8 to 10.4)     | 55395<br>(50382 to 60797) | 300.3<br>(275 to 328.1)   | 1677<br>(1160 to 2316)             | 9.6 (6.6 to 13.2)     | 57072<br>(51856 to 62539)              | 309.9<br>(283.4 to 338.1) | 10600<br>(7356 to 14525) | 29.3<br>(20.1 to 40)   | 93258<br>(69133 to 122756) | 262.8<br>(199.5 to 339.5) | 4650<br>(3159 to 6344) | 14.2<br>(9.6 to 19.2)  | 156108<br>(107927 to 215267) | 417<br>(286.2 to 570.2)   | 6981<br>(4254 to 10451)            | 19.3<br>(11.9 to 28.4) | 163089<br>(112703 to 223017)           | 436.2<br>(299.4 to 592)    |
|                   | Male   | 10 (7 to 12)           | 0.1 (0 to 0.1)         | 94 (71 to 120)            | 0.6 (0.5 to 0.8)          | 7 (6 to 9)             | 0.1 (0 to 0.1)        | 229<br>(179 to 281)       | 1.3 (1 to 1.6)            | 7 (5 to 11)                        | 0 (0 to 0.1)          | 237<br>(186 to 290)                    | 1.3 (1 to 1.7)            | 37 (22 to 54)            | 0.1 (0.1 to 0.1)       | 319<br>(221 to 445)        | 0.9 (0.6 to 1.2)          | 22 (13 to 32)          | 0.1 (0 to 0.1)         | 625<br>(382 to 918)          | 1.6 (1 to 2.3)            | 28 (16 to 46)                      | 0.1 (0 to 0.1)         | 653<br>(399 to 961)                    | 1.7 (1 to 2.4)             |
| El Salvador       | Both   | 236<br>(209 to 262)    | 7.3 (6.5 to 8.2)       | 1926<br>(1719 to 2136)    | 60.3<br>(53.9 to 66.9)    | 131<br>(118 to 146)    | 4.2 (3.8 to 4.7)      | 4244<br>(3788 to 4732)    | 128.3<br>(114.3 to 143.2) | 139 (95 to 189)                    | 4.3 (2.9 to 5.9)      | 4382<br>(3907 to 4897)                 | 132.6<br>(118.2 to 148.1) | 1020<br>(738 to 1375)    | 17.4<br>(12.6 to 23.5) | 8466<br>(6351 to 11223)    | 144.8<br>(108.2 to 191.9) | 373<br>(278 to 489)    | 6.3 (4.7 to 8.2)       | 10507<br>(7614 to 14184)     | 179.2<br>(129.9 to 241.9) | 609<br>(376 to 899)                | 10.4<br>(6.4 to 15.4)  | 11116<br>(8050 to 14929)               | 189.6<br>(137.7 to 254.4)  |
|                   | Female | 234<br>(207 to 261)    | 13.7<br>(12.1 to 15.3) | 1916<br>(1709 to 2125)    | 112.9<br>(100.7 to 125.3) | 130<br>(117 to 145)    | 7.8 (7 to 8.7)        | 4207<br>(3750 to 4695)    | 240.2<br>(213.7 to 268.2) | 138 (94 to 188)                    | 8 (5.5 to 11)         | 4344<br>(3870 to 4859)                 | 248.2<br>(221 to 277.7)   | 1014<br>(733 to 1368)    | 30.1<br>(21.7 to 40.7) | 8428<br>(6325 to 11172)    | 251.1<br>(187.8 to 332.9) | 370<br>(275 to 484)    | 10.8 (8 to 14.1)       | 10418<br>(7537 to 14069)     | 309.7<br>(224.4 to 418)   | 605<br>(373 to 894)                | 18 (11.1 to 26.7)      | 11023<br>(7984 to 14803)               | 327.7<br>(237.8 to 440.3)  |
|                   | Male   | 2 (1 to 2)             | 0.1 (0.1 to 0.1)       | 10 (9 to 12)              | 0.6 (0.6 to 0.8)          | 1 (1 to 1)             | 0.1 (0.1 to 0.1)      | 37 (33 to 42)             | 2.4 (2.1 to 2.7)          | 1 (1 to 1)                         | 0.1 (0 to 0.1)        | 38 (34 to 43)                          | 2.4 (2.1 to 2.8)          | 6 (4 to 8)               | 0.2 (0.2 to 0.3)       | 38 (27 to 51)              | 1.5 (1.1 to 2)            | 4 (3 to 5)             | 0.1 (0.1 to 0.2)       | 89 (65 to 120)               | 3.5 (2.5 to 4.8)          | 4 (2 to 6)                         | 0.2 (0.1 to 0.2)       | 93 (68 to 125)                         | 3.7 (2.7 to 5)             |
| Equatorial Guinea | Both   | 21 (14 to 29)          | 9.5 (6.2 to 13.4)      | 132 (97 to 172)           | 59.5<br>(44.8 to 76.9)    | 17 (11 to 24)          | 8.5 (5.6 to 11.9)     | 573<br>(372 to 814)       | 240.6<br>(157.2 to 341.3) | 11 (7 to 17)                       | 5.1 (3.1 to 7.5)      | 584<br>(379 to 830)                    | 245.7<br>(160.6 to 348.5) | 127 (70 to 212)          | 22.8<br>(13.1 to 36.9) | 880<br>(517 to 1447)       | 147.4<br>(90.8 to 234.2)  | 77 (43 to 126)         | 16 (9.4 to 25.4)       | 2372<br>(1284 to 4050)       | 388.3<br>(216.8 to 644)   | 74 (38 to 132)                     | 12.6<br>(6.9 to 21.5)  | 2446<br>(1329 to 4158)                 | 400.9<br>(222.7 to 663.3)  |
|                   | Female | 20 (13 to 29)          | 16.2<br>(10.5 to 23.1) | 128 (94 to 169)           | 102.7<br>(76.6 to 134.4)  | 17 (11 to 24)          | 14.2 (9 to 20.3)      | 553<br>(353 to 793)       | 415.8<br>(267.7 to 593.9) | 11 (7 to 16)                       | 8.7 (5.2 to 12.9)     | 564<br>(359 to 810)                    | 424.4<br>(273.2 to 607.1) | 125 (69 to 210)          | 39 (22.1 to 63.9)      | 869<br>(508 to 1430)       | 255.8<br>(155.2 to 409.6) | 75 (42 to 124)         | 26.7<br>(15.5 to 42.6) | 2336<br>(1253 to 3992)       | 673.7<br>(370.7 to 1130)  | 73 (38 to 131)                     | 21.7<br>(11.8 to 37.4) | 2409<br>(1297 to 4115)                 | 695.5<br>(381.1 to 1156.9) |
|                   | Male   | 1 (0 to 1)             | 0.8 (0.5 to 1.3)       | 3 (2 to 6)                | 3.7 (2.5 to 5.8)          | 1 (0 to 1)             | 0.8 (0.4 to 1.3)      | 19 (11 to 33)             | 19.3<br>(11.3 to 32.6)    | 0 (0 to 1)                         | 0.4 (0.2 to 0.8)      | 20 (12 to 34)                          | 19.7<br>(11.6 to 33.4)    | 2 (1 to 3)               | 0.8 (0.5 to 1.3)       | 11 (7 to 17)               | 4.7 (3 to 7)              | 1 (1 to 2)             | 0.7 (0.4 to 1.1)       | 36 (20 to 59)                | 14.8<br>(8.7 to 23.3)     | 1 (1 to 2)                         | 0.5 (0.3 to 0.8)       | 37 (21 to 60)                          | 15.4<br>(9.1 to 24)        |
| Eritrea           | Both   | 120 (73 to 173)        | 10.1<br>(6.3 to 14.3)  | 731<br>(487 to 1009)      | 60.6<br>(42.8 to 81.2)    | 99 (61 to 144)         | 9.1 (5.8 to 13.1)     | 3450<br>(2059 to 5096)    | 253.7<br>(157.1 to 367.3) | 66 (37 to 104)                     | 5.4 (3.2 to 8.3)      | 3516<br>(2101 to 5187)                 | 259.1<br>(160.2 to 374.8) | 534<br>(380 to 750)      | 17.2<br>(12.6 to 23.6) | 3486<br>(2591 to 4765)     | 105.4<br>(81.4 to 138.2)  | 385<br>(279 to 536)    | 14 (10.4 to 19.1)      | 12728<br>(8878 to 18107)     | 363.4<br>(264.2 to 503.1) | 299<br>(185 to 452)                | 9.2 (5.9 to 13.6)      | 13027<br>(9108 to 18510)               | 372.6<br>(270.7 to 515)    |
|                   | Female | 112 (65 to 166)        | 16 (9.5 to 23.7)       | 698<br>(449 to 975)       | 99.4<br>(67.8 to 136.1)   | 92 (53 to 137)         | 14 (8.5 to 20.9)      | 3242<br>(1857 to 4879)    | 419.5<br>(244.2 to 626.9) | 62 (33 to 100)                     | 8.7 (4.8 to 13.7)     | 3304<br>(1891 to 4966)                 | 428.2<br>(249.3 to 640)   | 512<br>(360 to 726)      | 28.7<br>(20.6 to 39.9) | 3369<br>(2470 to 4671)     | 181.3<br>(137.3 to 243.6) | 366<br>(260 to 516)    | 22.5<br>(16.2 to 31.2) | 12202<br>(8405 to 17448)     | 628.6<br>(443.1 to 890)   | 286<br>(174 to 434)                | 15.5<br>(9.7 to 23.6)  | 12488<br>(8607 to 17849)               | 644.1<br>(454.3 to 911.8)  |

|          |        | 1990                |                     |                        |                        |                     |                     |                           |                         |                                    |                     |                                        |                         | 2019                |                      |                        |                         |                     |                     |                           |                          |                                    |                     |                                        |                          |
|----------|--------|---------------------|---------------------|------------------------|------------------------|---------------------|---------------------|---------------------------|-------------------------|------------------------------------|---------------------|----------------------------------------|-------------------------|---------------------|----------------------|------------------------|-------------------------|---------------------|---------------------|---------------------------|--------------------------|------------------------------------|---------------------|----------------------------------------|--------------------------|
|          |        | Incidence           |                     | Prevalence             |                        | Deaths              |                     | YLLs (Years of Life Lost) |                         | YLDs (Years Lived with Disability) |                     | DALYs (Disability-Adjusted Life Years) |                         | Incidence           |                      | Prevalence             |                         | Deaths              |                     | YLLs (Years of Life Lost) |                          | YLDs (Years Lived with Disability) |                     | DALYs (Disability-Adjusted Life Years) |                          |
| Location | Sex    | Number              | Rate                | Number                 | Rate                   | Number              | Rate                | Number                    | Rate                    | Number                             | Rate                | Number                                 | Rate                    | Number              | Rate                 | Number                 | Rate                    | Number              | Rate                | Number                    | Rate                     | Number                             | Rate                | Number                                 | Rate                     |
|          | Male   | 8 (4 to 13)         | 2.3 (1.1 to 3.6)    | 34 (19 to 53)          | 8.9 (5.3 to 13.1)      | 7 (4 to 12)         | 2.4 (1.2 to 3.7)    | 208 (105 to 335)          | 49.4 (24.7 to 77.2)     | 4 (2 to 7)                         | 1.2 (0.5 to 1.9)    | 213 (107 to 342)                       | 50.6 (25.3 to 78.8)     | 23 (13 to 36)       | 2.5 (1.4 to 3.8)     | 117 (71 to 184)        | 11 (6.8 to 16.5)        | 19 (11 to 30)       | 2.4 (1.3 to 3.7)    | 526 (303 to 843)          | 46.5 (26.4 to 72.6)      | 13 (6 to 22)                       | 1.3 (0.6 to 2.2)    | 539 (309 to 863)                       | 47.8 (27 to 74.9)        |
| Estonia  | Both   | 604 (562 to 647)    | 30.7 (28.6 to 32.9) | 5873 (5358 to 6483)    | 296.6 (270.6 to 325.9) | 265 (249 to 280)    | 13.3 (12.5 to 14.1) | 7197 (6771 to 7639)       | 367.6 (346 to 389.6)    | 415 (296 to 562)                   | 21.1 (15.1 to 28.4) | 7612 (7164 to 8111)                    | 388.6 (365.7 to 413.3)  | 824 (635 to 1047)   | 36.9 (28.2 to 47.1)  | 8192 (6675 to 9904)    | 361.2 (289.3 to 442.4)  | 260 (205 to 327)    | 10.3 (8.1 to 13)    | 5548 (4307 to 7047)       | 253.9 (195.9 to 326.8)   | 579 (385 to 832)                   | 25.8 (17 to 37.2)   | 6126 (4767 to 7824)                    | 279.7 (213.9 to 359.7)   |
|          | Female | 601 (558 to 643)    | 52.4 (48.4 to 56.3) | 5851 (5335 to 6460)    | 500.2 (456.6 to 547.6) | 263 (247 to 278)    | 21.7 (20.4 to 23)   | 7159 (6735 to 7601)       | 635.8 (598.3 to 675.3)  | 413 (295 to 559)                   | 35.8 (25.4 to 48.4) | 7572 (7121 to 8071)                    | 671.6 (631.2 to 716.1)  | 817 (629 to 1038)   | 65.6 (49.8 to 84.4)  | 8143 (6629 to 9837)    | 639.8 (510.1 to 790)    | 258 (204 to 323)    | 17.2 (13.4 to 21.7) | 5498 (4272 to 6988)       | 454.8 (349.5 to 588.9)   | 574 (382 to 825)                   | 45.8 (29.9 to 66.5) | 6071 (4717 to 7752)                    | 500.6 (380.6 to 647.4)   |
|          | Male   | 3 (3 to 4)          | 0.4 (0.4 to 0.5)    | 22 (19 to 26)          | 2.9 (2.5 to 3.5)       | 2 (1 to 2)          | 0.2 (0.2 to 0.3)    | 38 (33 to 44)             | 5.1 (4.5 to 5.8)        | 2 (2 to 3)                         | 0.3 (0.2 to 0.4)    | 40 (35 to 46)                          | 5.4 (4.7 to 6.1)        | 6 (5 to 9)          | 0.7 (0.5 to 1)       | 49 (35 to 67)          | 5.3 (3.8 to 7.2)        | 3 (2 to 3)          | 0.3 (0.2 to 0.4)    | 50 (36 to 67)             | 5.4 (3.9 to 7.3)         | 5 (3 to 8)                         | 0.5 (0.3 to 0.8)    | 55 (39 to 74)                          | 5.9 (4.3 to 7.9)         |
| Eswatini | Both   | 39 (28 to 51)       | 12.2 (8.8 to 15.5)  | 275 (211 to 342)       | 82.7 (64.6 to 101.5)   | 30 (21 to 37)       | 10.1 (7.3 to 12.8)  | 915 (648 to 1182)         | 256.7 (185.2 to 326.9)  | 23 (15 to 32)                      | 6.8 (4.4 to 9.6)    | 937 (666 to 1213)                      | 263.5 (190.2 to 335.2)  | 119 (72 to 180)     | 19.5 (12.3 to 28.5)  | 826 (532 to 1214)      | 127.7 (86.6 to 181.7)   | 80 (50 to 120)      | 14.8 (9.6 to 21.1)  | 2392 (1405 to 3712)       | 357.7 (218.6 to 541)     | 68 (37 to 111)                     | 10.6 (6.1 to 16.8)  | 2460 (1442 to 3822)                    | 368.3 (223.9 to 555.2)   |
|          | Female | 38 (27 to 49)       | 20.7 (14.7 to 26.3) | 267 (202 to 334)       | 142.6 (109.5 to 176.5) | 28 (20 to 36)       | 16.6 (11.8 to 21.1) | 880 (617 to 1140)         | 445.2 (315.7 to 572.6)  | 22 (14 to 31)                      | 11.5 (7.4 to 16.3)  | 901 (636 to 1169)                      | 456.8 (323.2 to 588.8)  | 116 (68 to 176)     | 31.6 (19.2 to 47.1)  | 805 (517 to 1186)      | 212.5 (140.2 to 305.5)  | 78 (48 to 117)      | 23 (14.6 to 33.5)   | 2311 (1335 to 3591)       | 597 (355.3 to 918.5)     | 66 (36 to 108)                     | 17.4 (9.8 to 28)    | 2377 (1383 to 3697)                    | 614.4 (366.5 to 943.4)   |
|          | Male   | 1 (1 to 2)          | 1.2 (0.8 to 1.7)    | 8 (6 to 12)            | 6.3 (4.3 to 8.5)       | 1 (1 to 2)          | 1.1 (0.7 to 1.6)    | 35 (22 to 51)             | 24.5 (15.3 to 35)       | 1 (0 to 1)                         | 0.7 (0.4 to 1.1)    | 36 (22 to 52)                          | 25.2 (15.8 to 35.9)     | 4 (2 to 6)          | 1.5 (0.8 to 2.6)     | 21 (12 to 34)          | 8.1 (4.9 to 12.9)       | 3 (1 to 4)          | 1.3 (0.7 to 2.1)    | 81 (41 to 141)            | 29.8 (15.7 to 50)        | 2 (1 to 4)                         | 0.9 (0.5 to 1.5)    | 84 (43 to 144)                         | 30.7 (16.3 to 51.6)      |
| Ethiopia | Both   | 2740 (2041 to 3465) | 12.1 (9.2 to 15.3)  | 16202 (12324 to 19929) | 68.5 (54.5 to 83)      | 2243 (1694 to 2843) | 10.7 (8.3 to 13.8)  | 76329 (55021 to 97665)    | 301.9 (227.7 to 381.4)  | 1492 (973 to 2115)                 | 6.3 (4.2 to 8.9)    | 77822 (56151 to 99529)                 | 308.3 (232.8 to 389.3)  | 5900 (4638 to 7416) | 12.5 (10.1 to 15.3)  | 40718 (32450 to 50755) | 82.1 (67.1 to 98.5)     | 4105 (3298 to 4955) | 9.7 (8 to 11.6)     | 126168 (98093 to 157792)  | 245 (195 to 299.4)       | 3410 (2291 to 4979)                | 6.9 (4.8 to 9.8)    | 129579 (101092 to 161688)              | 251.9 (201.6 to 306.7)   |
|          | Female | 2445 (1740 to 3200) | 21.2 (15.6 to 27.8) | 14917 (10969 to 18715) | 126.3 (97.8 to 156.4)  | 1964 (1413 to 2545) | 18.3 (13.4 to 24.4) | 69255 (47513 to 90008)    | 544.2 (390.5 to 705.7)  | 1338 (830 to 1923)                 | 11.3 (7.3 to 16.3)  | 70593 (48714 to 91514)                 | 555.4 (399.7 to 721)    | 5446 (4211 to 6858) | 23 (18.4 to 28.1)    | 38335 (30297 to 47975) | 155 (126 to 187)        | 3702 (2966 to 4509) | 17.4 (14.3 to 20.5) | 117458 (91110 to 148074)  | 453.8 (360.7 to 557.5)   | 3159 (2103 to 4631)                | 12.8 (8.7 to 18.3)  | 120617 (93573 to 151557)               | 466.6 (373 to 569.9)     |
|          | Male   | 296 (220 to 393)    | 3.3 (2.5 to 4.3)    | 1286 (980 to 1684)     | 12.9 (10.1 to 16.6)    | 279 (205 to 374)    | 3.3 (2.5 to 4.4)    | 7074 (5232 to 9331)       | 68.5 (50.7 to 90.5)     | 155 (95 to 227)                    | 1.6 (1 to 2.3)      | 7228 (5363 to 9551)                    | 70.1 (51.9 to 92.6)     | 454 (284 to 774)    | 2.5 (1.6 to 4.1)     | 2383 (1580 to 4009)    | 12 (8 to 19.6)          | 404 (259 to 667)    | 2.3 (1.5 to 3.8)    | 8711 (5487 to 14700)      | 43 (27.3 to 72)          | 251 (133 to 455)                   | 1.3 (0.7 to 2.3)    | 8962 (5626 to 15071)                   | 44.3 (28.1 to 74.1)      |
| Fiji     | Both   | 103 (80 to 132)     | 22.3 (17.4 to 28.2) | 812 (654 to 1001)      | 173.8 (143 to 211.6)   | 64 (50 to 80)       | 15.7 (12.4 to 19.7) | 2246 (1745 to 2851)       | 452.7 (352.5 to 571.4)  | 63 (42 to 90)                      | 13.3 (8.9 to 18.6)  | 2310 (1799 to 2931)                    | 466 (363.7 to 588.9)    | 251 (185 to 332)    | 31.2 (23.4 to 40.9)  | 1927 (1486 to 2478)    | 230 (181.6 to 291.8)    | 147 (109 to 193)    | 20.3 (15.5 to 26.2) | 4556 (3348 to 5994)       | 538 (401.5 to 701.5)     | 151 (99 to 217)                    | 18.1 (12.1 to 25.7) | 4707 (3459 to 6193)                    | 556.1 (415.8 to 722.9)   |
|          | Female | 102 (79 to 130)     | 43.6 (33.9 to 55.2) | 805 (648 to 993)       | 340.8 (278.5 to 416.6) | 63 (49 to 80)       | 30.2 (23.7 to 38)   | 2225 (1725 to 2829)       | 890.7 (692.8 to 1127.7) | 63 (41 to 89)                      | 26 (17.5 to 36.6)   | 2288 (1784 to 2912)                    | 916.7 (715.4 to 1162.9) | 249 (183 to 330)    | 59.2 (44.2 to 77.7)  | 1913 (1474 to 2461)    | 443.2 (345.7 to 567)    | 145 (108 to 191)    | 37.1 (28.1 to 48.1) | 4517 (3315 to 5956)       | 1039.6 (770.8 to 1359.4) | 149 (99 to 216)                    | 34.8 (23.1 to 49.5) | 4667 (3430 to 6155)                    | 1074.4 (796.3 to 1408.8) |
|          | Male   | 1 (1 to 1)          | 0.6 (0.4 to 0.9)    | 7 (5 to 10)            | 3.9 (2.8 to 5.3)       | 1 (0 to 1)          | 0.5 (0.3 to 0.8)    | 21 (14 to 31)             | 10.9 (7.2 to 16.3)      | 1 (0 to 1)                         | 0.4 (0.2 to 0.6)    | 22 (14 to 32)                          | 11.3 (7.4 to 16.9)      | 2 (1 to 3)          | 0.6 (0.4 to 0.9)     | 14 (10 to 20)          | 4.2 (3.1 to 5.7)        | 1 (1 to 2)          | 0.5 (0.3 to 0.7)    | 39 (26 to 57)             | 10.7 (7.2 to 15.5)       | 1 (1 to 2)                         | 0.4 (0.2 to 0.7)    | 40 (27 to 60)                          | 11.1 (7.5 to 16.1)       |
| Finland  | Both   | 2527 (2382 to 2667) | 37.9 (35.7 to 40)   | 28905 (26093 to 32323) | 427.3 (388.3 to 472.9) | 849 (807 to 882)    | 12.4 (11.8 to 12.9) | 21041 (20204 to 21839)    | 319.1 (306.1 to 331.2)  | 1966 (1363 to 2713)                | 29.3 (20.3 to 40.6) | 23007 (21911 to 24156)                 | 348.4 (331.8 to 366.3)  | 4391 (3379 to 5570) | 44.1 (33.7 to 56.8)  | 50725 (42740 to 60396) | 488.5 (405.1 to 594.6)  | 1046 (931 to 1151)  | 8.9 (8 to 9.7)      | 20527 (18662 to 22343)    | 208.5 (190.6 to 225.8)   | 3428 (2262 to 4894)                | 33.9 (22 to 49.2)   | 23955 (21524 to 26714)                 | 242.4 (218.3 to 269.8)   |
|          | Female | 2516 (2372 to 2655) | 69 (64.9 to 72.9)   | 28809 (26006 to 32214) | 761.3 (695.7 to 837.6) | 844 (802 to 877)    | 21.2 (20.2 to 22)   | 20929 (20094 to 21720)    | 586.4 (562.4 to 609.8)  | 1957 (1356 to 2701)                | 52.8 (36.5 to 73)   | 22886 (21797 to 24030)                 | 639.2 (608.7 to 671.4)  | 4371 (3362 to 5543) | 84.6 (64.4 to 109.1) | 50524 (42565 to 60127) | 931.9 (767.5 to 1137.3) | 1039 (925 to 1145)  | 16.2 (14.7 to 17.7) | 20402 (18552 to 22217)    | 400 (366.3 to 433.5)     | 3410 (2248 to 4870)                | 65 (41.9 to 94.7)   | 23812 (21369 to 26551)                 | 465 (419 to 516.3)       |
|          | Male   | 11 (9 to 13)        | 0.4 (0.3 to 0.5)    | 97 (82 to 114)         | 3.5 (3 to 4.2)         | 5 (4 to 5)          | 0.2 (0.2 to 0.2)    | 112 (99 to 127)           | 4 (3.5 to 4.5)          | 9 (6 to 13)                        | 0.3 (0.2 to 0.5)    | 121 (107 to 137)                       | 4.3 (3.8 to 4.9)        | 20 (14 to 28)       | 0.4 (0.3 to 0.6)     | 201 (150 to 264)       | 4 (3 to 5.2)            | 6 (5 to 8)          | 0.1 (0.1 to 0.1)    | 125 (102 to 152)          | 2.6 (2.2 to 3.2)         | 18 (11 to 27)                      | 0.4 (0.2 to 0.5)    | 142 (116 to 175)                       | 3 (2.4 to 3.6)           |

|          |        | 1990                      |                     |                              |                        |                           |                     |                              |                         |                                    |                     |                                        | 2019                   |                           |                      |                              |                         |                           |                     |                              |                        |                                    |                     |                                        |                         |
|----------|--------|---------------------------|---------------------|------------------------------|------------------------|---------------------------|---------------------|------------------------------|-------------------------|------------------------------------|---------------------|----------------------------------------|------------------------|---------------------------|----------------------|------------------------------|-------------------------|---------------------------|---------------------|------------------------------|------------------------|------------------------------------|---------------------|----------------------------------------|-------------------------|
|          |        | Incidence                 |                     | Prevalence                   |                        | Deaths                    |                     | YLLs (Years of Life Lost)    |                         | YLDs (Years Lived with Disability) |                     | DALYs (Disability-Adjusted Life Years) |                        | Incidence                 |                      | Prevalence                   |                         | Deaths                    |                     | YLLs (Years of Life Lost)    |                        | YLDs (Years Lived with Disability) |                     | DALYs (Disability-Adjusted Life Years) |                         |
| Location | Sex    | Number                    | Rate                | Number                       | Rate                   | Number                    | Rate                | Number                       | Rate                    | Number                             | Rate                | Number                                 | Rate                   | Number                    | Rate                 | Number                       | Rate                    | Number                    | Rate                | Number                       | Rate                   | Number                             | Rate                | Number                                 | Rate                    |
| France   | Both   | 30703<br>(28877 to 32567) | 41 (38.7 to 43.5)   | 341003<br>(308300 to 381443) | 445.9 (407.1 to 492.9) | 12633<br>(11764 to 13219) | 15.8 (14.9 to 16.5) | 289352<br>(276954 to 299265) | 394.7 (379.7 to 407.4)  | 23231<br>(16157 to 32027)          | 30.8 (21.3 to 42.5) | 312582<br>(297763 to 325414)           | 425.6 (407.1 to 442.6) | 51276<br>(39714 to 66118) | 46.3 (35.4 to 60.2)  | 588160<br>(496047 to 705936) | 514.7 (425.9 to 633.5)  | 15326<br>(13075 to 16868) | 11.2 (10 to 12.1)   | 292998<br>(266624 to 315901) | 266.4 (245.1 to 286.6) | 39729<br>(25708 to 58116)          | 35.7 (22.8 to 53.1) | 332727<br>(298541 to 365857)           | 302.1 (274.5 to 332.2)  |
|          | Female | 30447<br>(28630 to 32297) | 75.4 (71.1 to 80)   | 338676<br>(306087 to 379048) | 811.2 (742.2 to 892.9) | 12515<br>(11649 to 13102) | 27.6 (26.1 to 28.6) | 286802<br>(274447 to 296651) | 732.6 (706.3 to 755.2)  | 23021<br>(15997 to 31744)          | 56.5 (38.9 to 78)   | 309822<br>(295067 to 322550)           | 789.1 (756.8 to 820.7) | 50715<br>(39237 to 65459) | 86.9 (66.2 to 113.2) | 582682<br>(491130 to 699196) | 962.6 (793.1 to 1187.3) | 15138<br>(12908 to 16690) | 19.9 (17.9 to 21.5) | 289573<br>(263528 to 312143) | 499.4 (460 to 537.2)   | 39253<br>(25447 to 57499)          | 67 (42.6 to 99.5)   | 328825<br>(295038 to 361825)           | 566.3 (514.3 to 623.2)  |
|          | Male   | 257<br>(219 to 303)       | 0.8 (0.6 to 0.9)    | 2327<br>(1979 to 2727)       | 6.9 (5.9 to 8.1)       | 119<br>(108 to 131)       | 0.4 (0.3 to 0.4)    | 2550<br>(2325 to 2810)       | 7.6 (6.9 to 8.3)        | 210<br>(143 to 299)                | 0.6 (0.4 to 0.9)    | 2760<br>(2515 to 3056)                 | 8.2 (7.4 to 9)         | 561<br>(396 to 781)       | 1 (0.7 to 1.4)       | 5478<br>(4196 to 7218)       | 9.6 (7.4 to 12.6)       | 188<br>(151 to 232)       | 0.3 (0.3 to 0.4)    | 3426<br>(2803 to 4115)       | 6.3 (5.2 to 7.5)       | 476<br>(285 to 716)                | 0.8 (0.5 to 1.3)    | 3902<br>(3162 to 4714)                 | 7.1 (5.9 to 8.6)        |
| Gabon    | Both   | 90 (69 to 116)            | 16 (12.4 to 20.4)   | 599<br>(482 to 736)          | 102.7 (83.3 to 124.8)  | 70 (54 to 89)             | 13.3 (10.4 to 16.8) | 2039<br>(1548 to 2629)       | 341.4 (261.2 to 438.4)  | 50 (32 to 71)                      | 8.6 (5.6 to 12.1)   | 2089<br>(1585 to 2689)                 | 350.1 (267.3 to 447.8) | 251<br>(162 to 356)       | 22.2 (14.4 to 30.7)  | 1795<br>(1238 to 2457)       | 150.9 (105.3 to 203)    | 161<br>(105 to 224)       | 16 (10.5 to 21.8)   | 4689<br>(3006 to 6692)       | 384.1 (249.1 to 541.1) | 145 (86 to 223)                    | 12.3 (7.5 to 18.6)  | 4834<br>(3107 to 6896)                 | 396.4 (259.2 to 557.3)  |
|          | Female | 88 (67 to 112)            | 28.1 (21.4 to 35.8) | 585<br>(467 to 721)          | 184.1 (147.2 to 226.2) | 68 (52 to 87)             | 22.6 (17.4 to 28.6) | 1978<br>(1488 to 2560)       | 618 (466 to 797.5)      | 49 (31 to 69)                      | 15.3 (10 to 21.7)   | 2026<br>(1529 to 2615)                 | 633.3 (476.4 to 815.3) | 245<br>(158 to 349)       | 40 (25.6 to 56.2)    | 1761<br>(1205 to 2420)       | 279 (193.4 to 378.3)    | 157<br>(102 to 220)       | 27.7 (18 to 38.2)   | 4575<br>(2917 to 6568)       | 706.7 (457 to 1005)    | 142 (83 to 218)                    | 22.5 (13.5 to 34.3) | 4717<br>(3020 to 6773)                 | 729.2 (470.5 to 1039.2) |
|          | Male   | 3 (2 to 4)                | 1 (0.6 to 1.5)      | 14 (9 to 20)                 | 5.5 (3.5 to 7.5)       | 2 (1 to 3)                | 0.9 (0.6 to 1.3)    | 61 (35 to 90)                | 22.6 (13.2 to 33.1)     | 2 (1 to 2)                         | 0.6 (0.3 to 1)      | 63 (36 to 93)                          | 23.2 (13.6 to 34)      | 5 (3 to 8)                | 1.1 (0.7 to 1.7)     | 34 (21 to 50)                | 6.4 (4.3 to 9.1)        | 4 (2 to 6)                | 0.9 (0.6 to 1.3)    | 114 (66 to 178)              | 20.6 (12.4 to 31.7)    | 3 (2 to 6)                         | 0.7 (0.4 to 1.1)    | 117 (68 to 183)                        | 21.2 (12.8 to 32.8)     |
| Gambia   | Both   | 18 (13 to 24)             | 4.4 (3.2 to 5.8)    | 131<br>(101 to 169)          | 32.9 (25.8 to 41.3)    | 13 (10 to 18)             | 3.5 (2.7 to 4.6)    | 433<br>(304 to 588)          | 97.7 (69.4 to 131.4)    | 11 (7 to 16)                       | 2.6 (1.6 to 3.7)    | 443<br>(311 to 600)                    | 100.3 (71.2 to 134.4)  | 96 (62 to 136)            | 8.9 (5.8 to 12.6)    | 669<br>(466 to 916)          | 60.6 (42.9 to 81.8)     | 65 (43 to 92)             | 6.4 (4.2 to 9.1)    | 2045<br>(1315 to 2948)       | 178 (115.4 to 255.3)   | 56 (32 to 88)                      | 5 (2.9 to 8)        | 2101<br>(1356 to 3025)                 | 183 (118.7 to 262)      |
|          | Female | 17 (12 to 23)             | 8.9 (6.5 to 12)     | 127 (97 to 164)              | 68 (52.9 to 86.6)      | 13 (9 to 17)              | 7.1 (5.2 to 9.3)    | 418<br>(292 to 570)          | 204.7 (144.3 to 275.7)  | 10 (6 to 15)                       | 5.3 (3.3 to 7.7)    | 428<br>(300 to 582)                    | 209.9 (148.4 to 281.9) | 94 (61 to 134)            | 17 (11 to 24.1)      | 656<br>(455 to 903)          | 117.6 (82.2 to 159.7)   | 63 (41 to 91)             | 12.1 (7.8 to 17.4)  | 1996<br>(1281 to 2894)       | 344.8 (221 to 498)     | 54 (32 to 86)                      | 9.7 (5.6 to 15.5)   | 2051<br>(1312 to 2976)                 | 354.5 (226 to 512.2)    |
|          | Male   | 1 (0 to 1)                | 0.3 (0.2 to 0.5)    | 4 (2 to 5)                   | 1.7 (1.2 to 2.5)       | 1 (0 to 1)                | 0.3 (0.2 to 0.5)    | 15 (10 to 23)                | 7.1 (4.6 to 10.9)       | 0 (0 to 1)                         | 0.2 (0.1 to 0.3)    | 16 (10 to 24)                          | 7.3 (4.7 to 11.2)      | 2 (1 to 3)                | 0.5 (0.3 to 0.7)     | 13 (9 to 19)                 | 2.4 (1.6 to 3.5)        | 2 (1 to 3)                | 0.4 (0.3 to 0.6)    | 48 (32 to 74)                | 9.2 (6 to 14.1)        | 1 (1 to 2)                         | 0.3 (0.2 to 0.5)    | 50 (33 to 76)                          | 9.5 (6.2 to 14.5)       |
| Georgia  | Both   | 2324<br>(2086 to 2565)    | 38.2 (34.5 to 42.1) | 20131<br>(18201 to 22203)    | 330.9 (299.2 to 364.1) | 1087<br>(987 to 1191)     | 17.9 (16.3 to 19.6) | 33229<br>(29923 to 36457)    | 543.3 (490.7 to 595.2)  | 1516<br>(1073 to 2102)             | 24.9 (17.7 to 34.5) | 34746<br>(31317 to 38197)              | 568.2 (513.7 to 623.9) | 1931<br>(1591 to 2332)    | 36.4 (30 to 43.9)    | 18439<br>(15859 to 21284)    | 343.1 (292.8 to 398.2)  | 905<br>(755 to 1079)      | 16 (13.2 to 19.1)   | 23676<br>(19610 to 28345)    | 452.1 (372.4 to 542.9) | 1300<br>(875 to 1784)              | 24.5 (16.5 to 33.9) | 24976<br>(20575 to 29962)              | 476.6 (391.6 to 571.4)  |
|          | Female | 2322<br>(2084 to 2563)    | 68 (61.1 to 75)     | 20115<br>(18183 to 22186)    | 585.9 (529.2 to 646.7) | 1086<br>(986 to 1190)     | 30.8 (28 to 33.7)   | 33201<br>(29897 to 36429)    | 977.6 (881.9 to 1072.7) | 1515<br>(1072 to 2100)             | 44.4 (31.4 to 61.9) | 34716<br>(31288 to 38167)              | 1022 (921.4 to 1124.3) | 1921<br>(1582 to 2319)    | 65.8 (54.2 to 79.5)  | 18372<br>(15800 to 21211)    | 618.2 (524.3 to 719.6)  | 900<br>(750 to 1073)      | 28 (23.1 to 33.5)   | 23546<br>(19508 to 28191)    | 822.2 (676.2 to 988.5) | 1293<br>(870 to 1775)              | 44.3 (29.7 to 61.2) | 24839<br>(20436 to 29782)              | 866.6 (709.4 to 1040)   |
|          | Male   | 2 (2 to 2)                | 0.1 (0.1 to 0.1)    | 17 (13 to 21)                | 0.7 (0.5 to 0.8)       | 1 (1 to 1)                | 0 (0 to 0)          | 28 (23 to 33)                | 1.1 (0.9 to 1.3)        | 2 (1 to 2)                         | 0.1 (0 to 0.1)      | 30 (25 to 35)                          | 1.1 (1 to 1.3)         | 10 (8 to 13)              | 0.4 (0.3 to 0.6)     | 67 (50 to 88)                | 2.9 (2.2 to 3.7)        | 6 (4 to 7)                | 0.2 (0.2 to 0.3)    | 130<br>(100 to 164)          | 5.6 (4.3 to 7)         | 7 (5 to 11)                        | 0.3 (0.2 to 0.5)    | 137<br>(106 to 173)                    | 5.9 (4.5 to 7.4)        |
| Germany  | Both   | 46660<br>(44258 to 49025) | 39.8 (37.8 to 41.8) | 516030<br>(465982 to 578689) | 432.7 (393.9 to 480.2) | 19246<br>(18204 to 20027) | 15.8 (15 to 16.4)   | 453903<br>(436579 to 468360) | 398.6 (383.6 to 411.1)  | 35550<br>(24835 to 48428)          | 30.1 (21 to 41.1)   | 489453<br>(468823 to 509792)           | 428.6 (410.7 to 445.7) | 70173<br>(53859 to 90348) | 44.3 (33.9 to 58)    | 765284<br>(639333 to 918572) | 470.5 (386.9 to 576.5)  | 21652<br>(19398 to 23510) | 11.5 (10.5 to 12.4) | 417684<br>(384562 to 446322) | 266.4 (248.4 to 283.9) | 53047<br>(35685 to 77083)          | 33.3 (21.9 to 48.9) | 470731<br>(428737 to 511632)           | 299.7 (275 to 326)      |
|          | Female | 46415<br>(44001 to 48765) | 70.8 (67.4 to 74.3) | 513707<br>(463858 to 576093) | 758.7 (695.3 to 837.7) | 19134<br>(18096 to 19914) | 26.8 (25.6 to 27.8) | 451360<br>(434063 to 465838) | 729.5 (703.7 to 752.8)  | 35344<br>(24709 to 48190)          | 53.2 (37.1 to 72.8) | 486704<br>(465991 to 506766)           | 782.7 (750.9 to 813.7) | 69662<br>(53510 to 89596) | 84.7 (64.8 to 111.4) | 760184<br>(634721 to 912523) | 897.7 (735.2 to 1104.3) | 21486<br>(19235 to 23348) | 21 (19.2 to 22.5)   | 414466<br>(381503 to 443160) | 510.5 (476.3 to 544.9) | 52602<br>(35409 to 76321)          | 63.7 (41.8 to 93.8) | 467068<br>(424918 to 508158)           | 574.1 (525.4 to 625.3)  |
|          | Male   | 245<br>(211 to 287)       | 0.5 (0.4 to 0.6)    | 2323<br>(1988 to 2734)       | 4.9 (4.2 to 5.7)       | 112<br>(101 to 124)       | 0.2 (0.2 to 0.3)    | 2543<br>(2301 to 2794)       | 5.2 (4.7 to 5.7)        | 206<br>(140 to 291)                | 0.4 (0.3 to 0.6)    | 2749<br>(2475 to 3023)                 | 5.6 (5.1 to 6.2)       | 512<br>(362 to 701)       | 0.6 (0.5 to 0.9)     | 5100<br>(3954 to 6545)       | 6.3 (4.9 to 8.1)        | 166<br>(135 to 204)       | 0.2 (0.2 to 0.2)    | 3218<br>(2688 to 3830)       | 4.2 (3.6 to 4.9)       | 445<br>(273 to 681)                | 0.6 (0.3 to 0.8)    | 3663<br>(3035 to 4378)                 | 4.8 (4 to 5.6)          |

|           |        | 1990                   |                        |                           |                           |                        |                        |                           |                           |                                    |                        |                                        |                            | 2019                    |                         |                            |                            |                        |                        |                            |                           |                                    |                        |                                        |                            |
|-----------|--------|------------------------|------------------------|---------------------------|---------------------------|------------------------|------------------------|---------------------------|---------------------------|------------------------------------|------------------------|----------------------------------------|----------------------------|-------------------------|-------------------------|----------------------------|----------------------------|------------------------|------------------------|----------------------------|---------------------------|------------------------------------|------------------------|----------------------------------------|----------------------------|
|           |        | Incidence              |                        | Prevalence                |                           | Deaths                 |                        | YLLs (Years of Life Lost) |                           | YLDs (Years Lived with Disability) |                        | DALYs (Disability-Adjusted Life Years) |                            | Incidence               |                         | Prevalence                 |                            | Deaths                 |                        | YLLs (Years of Life Lost)  |                           | YLDs (Years Lived with Disability) |                        | DALYs (Disability-Adjusted Life Years) |                            |
| Location  | Sex    | Number                 | Rate                   | Number                    | Rate                      | Number                 | Rate                   | Number                    | Rate                      | Number                             | Rate                   | Number                                 | Rate                       | Number                  | Rate                    | Number                     | Rate                       | Number                 | Rate                   | Number                     | Rate                      | Number                             | Rate                   | Number                                 | Rate                       |
| Ghana     | Both   | 1225<br>(935 to 1568)  | 16.6<br>(12.9 to 20.9) | 8102<br>(6300 to 10197)   | 107.3<br>(85.8 to 133.2)  | 890<br>(679 to 1130)   | 13.1<br>(10.2 to 16.5) | 29911<br>(22380 to 38410) | 373.5<br>(283.1 to 473.5) | 689<br>(447 to 989)                | 9.1 (6 to 13)          | 30600<br>(22896 to 39320)              | 382.6<br>(291.2 to 485.6)  | 4702<br>(3597 to 6064)  | 25.1<br>(19.7 to 31.9)  | 33710<br>(26182 to 42940)  | 173.5<br>(139.4 to 216)    | 2902<br>(2258 to 3703) | 17.2<br>(13.7 to 21.7) | 92733<br>(70057 to 120439) | 461<br>(356.8 to 590.5)   | 2771<br>(1771 to 4038)             | 14.3<br>(9.4 to 20.6)  | 95504<br>(72117 to 124147)             | 475.3<br>(367.1 to 609.9)  |
|           | Female | 1220<br>(931 to 1562)  | 32 (24.7 to 40.3)      | 8074<br>(6274 to 10164)   | 207.1<br>(165.3 to 258.1) | 886<br>(676 to 1125)   | 24.9<br>(19.3 to 31.3) | 29792<br>(22258 to 38270) | 725.1<br>(548.9 to 919.5) | 686<br>(445 to 986)                | 17.5<br>(11.5 to 25)   | 30478<br>(22789 to 39175)              | 742.6<br>(564.5 to 944.2)  | 4691<br>(3588 to 6049)  | 45.1<br>(35.1 to 57.6)  | 33644<br>(26121 to 42846)  | 314.3<br>(251.4 to 392.4)  | 2894<br>(2253 to 3692) | 30.3<br>(24.1 to 38.2) | 92505<br>(69848 to 120156) | 837.6<br>(646.4 to 1077)  | 2764<br>(1765 to 4028)             | 25.8<br>(16.8 to 37.5) | 95269<br>(71955 to 123925)             | 863.5<br>(665.4 to 1110.8) |
|           | Male   | 5 (3 to 7)             | 0.1 (0.1 to 0.2)       | 28 (19 to 39)             | 0.8 (0.5 to 1.1)          | 4 (3 to 5)             | 0.1 (0.1 to 0.2)       | 119 (81 to 169)           | 3.2 (2.2 to 4.6)          | 3 (2 to 5)                         | 0.1 (0.1 to 0.1)       | 122 (84 to 173)                        | 3.3 (2.2 to 4.7)           | 10 (7 to 14)            | 0.1 (0.1 to 0.2)        | 66 (48 to 89)              | 0.8 (0.5 to 1)             | 8 (5 to 10)            | 0.1 (0.1 to 0.2)       | 228 (160 to 309)           | 2.7 (1.9 to 3.6)          | 7 (4 to 11)                        | 0.1 (0.1 to 0.1)       | 235 (165 to 318)                       | 2.7 (1.9 to 3.7)           |
| Greece    | Both   | 5293<br>(4939 to 5664) | 38 (35.5 to 40.6)      | 61254<br>(54929 to 68199) | 429.8<br>(388.1 to 474.9) | 1807<br>(1712 to 1885) | 12.6<br>(11.9 to 13.1) | 45724<br>(43829 to 47612) | 330.9<br>(317.2 to 344.6) | 4134<br>(2872 to 5620)             | 29.4<br>(20.5 to 40)   | 49859<br>(47445 to 52442)              | 360.4<br>(343.9 to 379.1)  | 8800<br>(6819 to 11260) | 45.3<br>(34.6 to 58.8)  | 95248<br>(79956 to 115096) | 482.7<br>(396.8 to 590.6)  | 2822<br>(2516 to 3080) | 11.7<br>(10.7 to 12.7) | 52733<br>(48453 to 56713)  | 274.5<br>(255 to 293.3)   | 6655<br>(4470 to 9573)             | 34.2<br>(22.8 to 49.8) | 59388<br>(54309 to 65320)              | 308.7<br>(283.5 to 337.6)  |
|           | Female | 5267<br>(4913 to 5636) | 72.2<br>(67.3 to 77.1) | 60985<br>(54651 to 67872) | 810<br>(732.4 to 894.2)   | 1796<br>(1701 to 1874) | 23.3<br>(22.1 to 24.3) | 45487<br>(43582 to 47377) | 630.6<br>(605.3 to 656.5) | 4112<br>(2855 to 5589)             | 55.6<br>(38.7 to 75.7) | 49599<br>(47200 to 52165)              | 686.3<br>(655.2 to 722.1)  | 8715<br>(6756 to 11158) | 85.5<br>(65.1 to 111.3) | 94481<br>(79331 to 114115) | 911.4<br>(748.2 to 1117.6) | 2791<br>(2482 to 3049) | 21.6<br>(19.7 to 23.3) | 52185<br>(47958 to 56154)  | 518.3<br>(481.3 to 553.7) | 6584<br>(4422 to 9468)             | 64.6<br>(42.8 to 94.2) | 58769<br>(53767 to 64658)              | 582.9<br>(535.4 to 637.4)  |
|           | Male   | 26 (22 to 31)          | 0.4 (0.3 to 0.5)       | 269 (227 to 321)          | 4 (3.4 to 4.7)            | 11 (10 to 12)          | 0.2 (0.1 to 0.2)       | 237 (215 to 262)          | 3.5 (3.2 to 3.8)          | 23 (15 to 32)                      | 0.3 (0.2 to 0.5)       | 260 (235 to 290)                       | 3.8 (3.5 to 4.2)           | 85 (63 to 112)          | 0.9 (0.6 to 1.1)        | 766 (592 to 961)           | 7.7 (5.9 to 9.7)           | 30 (26 to 35)          | 0.3 (0.2 to 0.3)       | 548 (484 to 626)           | 5.8 (5.2 to 6.6)          | 71 (44 to 104)                     | 0.7 (0.4 to 1)         | 619 (540 to 709)                       | 6.5 (5.8 to 7.5)           |
| Greenland | Both   | 15 (13 to 18)          | 44.3<br>(37.3 to 50.8) | 120<br>(103 to 138)       | 327.5<br>(284.3 to 372.8) | 9 (8 to 11)            | 31.2<br>(26.3 to 35.9) | 259<br>(216 to 303)       | 672.4<br>(572.9 to 775.1) | 10 (7 to 14)                       | 27.2<br>(18.8 to 36.4) | 268<br>(225 to 315)                    | 699.6<br>(592.7 to 807.4)  | 16 (12 to 20)           | 21.9<br>(17.3 to 27.7)  | 156<br>(130 to 189)        | 219.7<br>(184.2 to 262.9)  | 7 (5 to 8)             | 9.8 (7.8 to 12.2)      | 186<br>(143 to 240)        | 254.1<br>(198.2 to 322.1) | 11 (7 to 16)                       | 15.6<br>(10.6 to 22)   | 198<br>(151 to 255)                    | 269.7<br>(209.9 to 343.9)  |
|           | Female | 10 (8 to 12)           | 50.6<br>(41.8 to 61)   | 92 (78 to 108)            | 493.3<br>(424 to 573.6)   | 5 (4 to 6)             | 27.9<br>(23.1 to 33.3) | 166<br>(136 to 202)       | 814.4<br>(665.5 to 981)   | 7 (5 to 9)                         | 35.2<br>(23.8 to 48.8) | 173<br>(141 to 210)                    | 849.6<br>(696.2 to 1025.8) | 15 (12 to 19)           | 45.2<br>(35.3 to 56.9)  | 151<br>(125 to 182)        | 454.1<br>(379.5 to 540.8)  | 6 (5 to 8)             | 19.3<br>(15.3 to 24)   | 178<br>(136 to 228)        | 522.2<br>(404.7 to 660.4) | 11 (7 to 15)                       | 32.1<br>(21.6 to 45.3) | 188<br>(144 to 241)                    | 554.3<br>(427.5 to 705.5)  |
|           | Male   | 5 (4 to 7)             | 48.2 (38 to 59.8)      | 28 (22 to 35)             | 190.6<br>(148.5 to 238.2) | 4 (3 to 5)             | 43 (33.9 to 53.7)      | 93 (75 to 112)            | 666.5<br>(536.2 to 804)   | 3 (2 to 4)                         | 23.7<br>(15.6 to 32.7) | 96 (77 to 116)                         | 690.2<br>(555.8 to 833.8)  | 1 (0 to 1)              | 1.9 (1.3 to 2.5)        | 6 (4 to 7)                 | 16 (12.8 to 19.9)          | 0 (0 to 1)             | 1.3 (0.9 to 1.8)       | 9 (6 to 12)                | 24.2 (17 to 31.9)         | 0 (0 to 1)                         | 1.3 (0.8 to 2.2)       | 9 (6 to 12)                            | 25.6<br>(17.9 to 33.8)     |
| Grenada   | Both   | 18 (16 to 20)          | 27.6<br>(24.3 to 31)   | 138<br>(124 to 155)       | 212.8<br>(189.1 to 238.6) | 10 (9 to 12)           | 15.1<br>(13.5 to 16.8) | 268<br>(238 to 300)       | 420.4<br>(370 to 471.7)   | 10 (7 to 14)                       | 16 (11.2 to 21.5)      | 279<br>(248 to 311)                    | 436.3<br>(384.6 to 489.2)  | 42 (36 to 47)           | 36.7 (32 to 41.5)       | 333<br>(289 to 377)        | 287.9<br>(251.8 to 324.7)  | 18 (16 to 20)          | 16.5<br>(14.6 to 18.4) | 482<br>(419 to 547)        | 417.2<br>(364.1 to 472.8) | 25 (17 to 33)                      | 21.5<br>(15.1 to 28.6) | 506<br>(441 to 578)                    | 438.7<br>(383.3 to 499.9)  |
|           | Female | 18 (16 to 20)          | 49.4<br>(43.4 to 55.7) | 137<br>(122 to 153)       | 384<br>(340.3 to 430.9)   | 10 (9 to 11)           | 26.2<br>(23.4 to 29.2) | 263<br>(233 to 294)       | 761.4<br>(668.7 to 855)   | 10 (7 to 14)                       | 28.7<br>(20.2 to 38.8) | 274<br>(243 to 306)                    | 790.1<br>(695.2 to 887.4)  | 41 (36 to 47)           | 70.9<br>(61.3 to 80.6)  | 330<br>(287 to 374)        | 564.5<br>(490.6 to 640.1)  | 17 (15 to 20)          | 30.1<br>(26.6 to 33.6) | 477<br>(414 to 542)        | 816.3<br>(709.6 to 929.4) | 24 (17 to 33)                      | 41.7<br>(29.3 to 55.7) | 501<br>(437 to 571)                    | 858<br>(745.2 to 981.8)    |
|           | Male   | 0 (0 to 0)             | 1 (0.8 to 1.2)         | 2 (1 to 2)                | 5.8 (4.8 to 7)            | 0 (0 to 0)             | 0.8 (0.7 to 1)         | 5 (4 to 6)                | 17.7<br>(14.4 to 21.2)    | 0 (0 to 0)                         | 0.6 (0.4 to 0.8)       | 5 (4 to 6)                             | 18.3<br>(14.8 to 21.9)     | 0 (0 to 0)              | 0.7 (0.5 to 0.8)        | 3 (2 to 3)                 | 4.8 (3.9 to 5.8)           | 0 (0 to 0)             | 0.5 (0.4 to 0.6)       | 5 (4 to 7)                 | 9.6 (7.8 to 11.7)         | 0 (0 to 0)                         | 0.4 (0.3 to 0.6)       | 5 (4 to 7)                             | 10 (8.1 to 12.3)           |
| Guam      | Both   | 13 (11 to 15)          | 14.6<br>(12.5 to 16.9) | 117<br>(102 to 135)       | 131.6<br>(114.5 to 150.6) | 6 (5 to 7)             | 8.9 (7.7 to 10.4)      | 188<br>(160 to 218)       | 207.4<br>(177.8 to 240.5) | 9 (6 to 12)                        | 9.4 (6.5 to 13)        | 196<br>(167 to 229)                    | 216.9<br>(186 to 251)      | 35 (29 to 43)           | 19.1<br>(15.6 to 23.4)  | 320<br>(271 to 379)        | 171.3<br>(144.8 to 201.6)  | 17 (14 to 20)          | 9.1 (7.5 to 11.1)      | 454<br>(369 to 556)        | 243.7<br>(199.2 to 296.4) | 23 (15 to 33)                      | 12.5<br>(8.3 to 17.8)  | 477<br>(389 to 585)                    | 256.2<br>(210.1 to 312.5)  |
|           | Female | 13 (11 to 15)          | 29.6<br>(25.4 to 34.1) | 117<br>(102 to 135)       | 268.7<br>(233.7 to 307.3) | 6 (5 to 7)             | 17.3<br>(14.8 to 20)   | 187<br>(159 to 218)       | 423.5<br>(362.4 to 492)   | 8 (6 to 12)                        | 19.3<br>(13.1 to 26.5) | 196<br>(166 to 228)                    | 442.7<br>(378.4 to 515.3)  | 35 (29 to 43)           | 38 (30.9 to 46.7)       | 320<br>(270 to 378)        | 343.2<br>(289.3 to 404.8)  | 17 (14 to 20)          | 17.5<br>(14.5 to 21.3) | 452<br>(368 to 554)        | 489.2<br>(398.3 to 594.1) | 23 (15 to 33)                      | 25.1<br>(16.6 to 35.7) | 475<br>(388 to 583)                    | 514.2<br>(420.7 to 628.7)  |
|           | Male   | 0 (0 to 0)             | 0.1 (0.1 to 0.1)       | 0 (0 to 0)                | 0.7 (0.6 to 1)            | 0 (0 to 0)             | 0.1 (0 to 0.1)         | 1 (1 to 1)                | 1.4 (1.1 to 1.8)          | 0 (0 to 0)                         | 0.1 (0 to 0.1)         | 1 (1 to 1)                             | 1.5 (1.1 to 1.9)           | 0 (0 to 0)              | 0.1 (0.1 to 0.1)        | 1 (1 to 1)                 | 0.9 (0.7 to 1.1)           | 0 (0 to 0)             | 0.1 (0 to 0.1)         | 1 (1 to 2)                 | 1.5 (1.1 to 2)            | 0 (0 to 0)                         | 0.1 (0.1 to 0.1)       | 1 (1 to 2)                             | 1.6 (1.2 to 2.1)           |
| Guatemala | Both   | 275<br>(234 to 323)    | 6.4 (5.5 to 7.5)       | 2113<br>(1828 to 2440)    | 49.2<br>(42.8 to 56.3)    | 175<br>(149 to 202)    | 4.3 (3.7 to 5)         | 5996<br>(5061 to 6946)    | 131.5<br>(111.4 to 152.1) | 157<br>(109 to 217)                | 3.6 (2.5 to 5)         | 6153<br>(5179 to 7119)                 | 135.1<br>(114.8 to 155.9)  | 1453<br>(1111 to 1881)  | 12.2<br>(9.5 to 15.8)   | 11434<br>(8983 to 14561)   | 95.3<br>(75.4 to 121)      | 669<br>(527 to 848)    | 6 (4.7 to 7.5)         | 19986<br>(15414 to 25695)  | 163.1<br>(126.9 to 209.3) | 838<br>(551 to 1211)               | 7 (4.6 to 10.1)        | 20825<br>(16036 to 26673)              | 170.1<br>(132 to 218)      |

|               |        | 1990                |                        |                        |                           |                     |                        |                           |                            |                                    |                        |                                        |                            | 2019                   |                        |                          |                           |                       |                        |                           |                            |                                    |                        |                                        |                           |
|---------------|--------|---------------------|------------------------|------------------------|---------------------------|---------------------|------------------------|---------------------------|----------------------------|------------------------------------|------------------------|----------------------------------------|----------------------------|------------------------|------------------------|--------------------------|---------------------------|-----------------------|------------------------|---------------------------|----------------------------|------------------------------------|------------------------|----------------------------------------|---------------------------|
|               |        | Incidence           |                        | Prevalence             |                           | Deaths              |                        | YLLs (Years of Life Lost) |                            | YLDs (Years Lived with Disability) |                        | DALYs (Disability-Adjusted Life Years) |                            | Incidence              |                        | Prevalence               |                           | Deaths                |                        | YLLs (Years of Life Lost) |                            | YLDs (Years Lived with Disability) |                        | DALYs (Disability-Adjusted Life Years) |                           |
| Location      | Sex    | Number              | Rate                   | Number                 | Rate                      | Number              | Rate                   | Number                    | Rate                       | Number                             | Rate                   | Number                                 | Rate                       | Number                 | Rate                   | Number                   | Rate                      | Number                | Rate                   | Number                    | Rate                       | Number                             | Rate                   | Number                                 | Rate                      |
|               | Female | 272<br>(231 to 319) | 12.6<br>(10.8 to 14.7) | 2091<br>(1805 to 2415) | 96.7<br>(84.1 to 110.5)   | 172<br>(146 to 199) | 8.5 (7.4 to 9.7)       | 5915<br>(4981 to 6870)    | 256.4<br>(217.2 to 296.9)  | 155<br>(107 to 215)                | 7.1 (4.9 to 9.8)       | 6070<br>(5100 to 7041)                 | 263.5<br>(223.3 to 304.2)  | 1446<br>(1106 to 1873) | 22.1 (17 to 28.5)      | 11378<br>(8935 to 14486) | 172.3<br>(136.2 to 218.8) | 665<br>(524 to 842)   | 10.6<br>(8.4 to 13.4)  | 19861<br>(15309 to 25538) | 294<br>(228.4 to 377.3)    | 834<br>(547 to 1205)               | 12.6<br>(8.3 to 18.2)  | 20694<br>(15931 to 26521)              | 306.6<br>(237.8 to 392.9) |
|               | Male   | 3 (3 to 4)          | 0.2 (0.2 to 0.2)       | 23 (19 to 27)          | 1.1 (0.9 to 1.3)          | 3 (2 to 3)          | 0.2 (0.1 to 0.2)       | 81 (67 to 97)             | 4 (3.2 to 4.8)             | 2 (1 to 3)                         | 0.1 (0.1 to 0.1)       | 83 (68 to 100)                         | 4.1 (3.3 to 4.9)           | 7 (5 to 9)             | 0.1 (0.1 to 0.2)       | 56 (44 to 71)            | 1 (0.8 to 1.3)            | 5 (4 to 6)            | 0.1 (0.1 to 0.1)       | 126 (96 to 162)           | 2.3 (1.7 to 2.9)           | 5 (3 to 7)                         | 0.1 (0.1 to 0.1)       | 130 (100 to 169)                       | 2.3 (1.8 to 3)            |
| Guinea        | Both   | 332<br>(268 to 404) | 9.4 (7.6 to 11.5)      | 2128<br>(1779 to 2484) | 60 (50.3 to 70)           | 272<br>(221 to 330) | 8 (6.5 to 9.7)         | 8472<br>(6894 to 10205)   | 230.8<br>(187.3 to 279.5)  | 182<br>(122 to 257)                | 5.1 (3.4 to 7.2)       | 8654<br>(7044 to 10437)                | 235.9<br>(191.3 to 286.9)  | 780<br>(562 to 1054)   | 12.7<br>(9.3 to 16.8)  | 5175<br>(3951 to 6755)   | 82.6<br>(63.9 to 106.3)   | 575<br>(419 to 760)   | 9.9 (7.3 to 13)        | 18164<br>(13089 to 24692) | 277.9<br>(201 to 373.2)    | 439<br>(279 to 659)                | 7 (4.4 to 10.4)        | 18603<br>(13383 to 25427)              | 284.9<br>(206.6 to 385.2) |
|               | Female | 326<br>(261 to 396) | 18.3<br>(14.7 to 22.3) | 2093<br>(1748 to 2446) | 117<br>(97.8 to 136.4)    | 266<br>(215 to 322) | 15.5<br>(12.5 to 18.9) | 8313<br>(6734 to 10001)   | 446.3<br>(360.4 to 539.9)  | 178<br>(118 to 251)                | 9.9 (6.6 to 13.9)      | 8491<br>(6874 to 10243)                | 456.2<br>(368.2 to 552.8)  | 765<br>(551 to 1038)   | 24.6<br>(17.9 to 32.9) | 5095<br>(3878 to 6680)   | 161.8<br>(125.3 to 207.6) | 562<br>(409 to 745)   | 19.2 (14 to 25.2)      | 17822<br>(12784 to 24311) | 538.4<br>(385.6 to 721.4)  | 430<br>(272 to 648)                | 13.6<br>(8.6 to 20.2)  | 18252<br>(13073 to 25017)              | 552<br>(395.9 to 746.2)   |
|               | Male   | 7 (5 to 10)         | 0.4 (0.3 to 0.6)       | 35 (26 to 49)          | 2 (1.4 to 2.8)            | 6 (4 to 9)          | 0.4 (0.3 to 0.6)       | 159<br>(108 to 231)       | 9 (6.3 to 13.2)            | 4 (2 to 6)                         | 0.2 (0.1 to 0.4)       | 163<br>(111 to 236)                    | 9.3 (6.4 to 13.5)          | 15 (10 to 23)          | 0.5 (0.4 to 0.8)       | 81 (56 to 120)           | 2.7 (1.8 to 3.9)          | 13 (9 to 19)          | 0.5 (0.3 to 0.7)       | 342<br>(229 to 519)       | 11.2<br>(7.5 to 17.2)      | 9 (5 to 15)                        | 0.3 (0.2 to 0.5)       | 351<br>(235 to 531)                    | 11.5<br>(7.6 to 17.7)     |
| Guinea-Bissau | Both   | 52 (36 to 71)       | 11 (7.7 to 14.8)       | 330<br>(240 to 434)    | 69.5<br>(52.2 to 89.8)    | 41 (28 to 55)       | 9.1 (6.5 to 12)        | 1410<br>(958 to 1956)     | 276.8<br>(189.8 to 379)    | 29 (17 to 42)                      | 6 (3.7 to 8.6)         | 1439<br>(975 to 1992)                  | 282.7<br>(194.8 to 385.5)  | 144 (97 to 211)        | 16.1<br>(11.2 to 23.3) | 954<br>(674 to 1355)     | 104<br>(76.5 to 143.1)    | 100 (69 to 145)       | 12.4<br>(8.8 to 17.9)  | 3452<br>(2321 to 5153)    | 351.9<br>(241.9 to 514.2)  | 81 (49 to 130)                     | 8.8 (5.5 to 14)        | 3533<br>(2368 to 5289)                 | 360.7<br>(247.9 to 524.3) |
|               | Female | 52 (36 to 71)       | 20.7<br>(14.5 to 27.7) | 328<br>(239 to 432)    | 130.7<br>(98.5 to 168.6)  | 40 (28 to 54)       | 17.1<br>(12.1 to 22.5) | 1399<br>(952 to 1944)     | 518.1<br>(356.4 to 707.2)  | 29 (17 to 42)                      | 11.2<br>(6.9 to 16.1)  | 1428<br>(969 to 1977)                  | 529.4<br>(364.1 to 722.5)  | 143 (97 to 210)        | 29.5<br>(20.4 to 42.7) | 950<br>(671 to 1350)     | 191.2<br>(140.2 to 264.2) | 99 (69 to 144)        | 22.3<br>(15.6 to 32.1) | 3433<br>(2308 to 5134)    | 649.5<br>(445.1 to 952.5)  | 81 (49 to 130)                     | 16.2 (10 to 25.7)      | 3514<br>(2354 to 5270)                 | 665.7<br>(455.3 to 969.3) |
|               | Male   | 0 (0 to 1)          | 0.2 (0.1 to 0.3)       | 2 (1 to 3)             | 1 (0.6 to 1.5)            | 0 (0 to 1)          | 0.2 (0.1 to 0.3)       | 11 (6 to 18)              | 4.9 (2.7 to 7.9)           | 0 (0 to 0)                         | 0.1 (0.1 to 0.2)       | 11 (6 to 18)                           | 5 (2.8 to 8.1)             | 1 (1 to 1)             | 0.2 (0.1 to 0.3)       | 4 (3 to 6)               | 1.1 (0.7 to 1.6)          | 1 (0 to 1)            | 0.2 (0.1 to 0.3)       | 19 (12 to 27)             | 4.7 (3.1 to 6.9)           | 0 (0 to 1)                         | 0.1 (0.1 to 0.2)       | 19 (13 to 28)                          | 4.8 (3.2 to 7.1)          |
| Guyana        | Both   | 85 (72 to 101)      | 19.8<br>(16.7 to 23.3) | 650<br>(552 to 760)    | 149.8<br>(129.1 to 173.3) | 50 (42 to 59)       | 12.5<br>(10.6 to 14.5) | 1591<br>(1325 to 1894)    | 348.3<br>(293.1 to 412.8)  | 48 (33 to 67)                      | 11.1<br>(7.6 to 15.3)  | 1640<br>(1367 to 1950)                 | 359.4<br>(302.4 to 426)    | 181<br>(135 to 235)    | 26.1<br>(19.8 to 33.6) | 1421<br>(1092 to 1812)   | 202.5<br>(157.7 to 255.1) | 88 (67 to 113)        | 13.6<br>(10.6 to 17.2) | 2774<br>(2049 to 3637)    | 388.2<br>(290.4 to 505.3)  | 105 (67 to 151)                    | 15 (9.8 to 21.5)       | 2878<br>(2141 to 3761)                 | 403.2<br>(303.3 to 525.6) |
|               | Female | 84 (71 to 100)      | 37.8<br>(31.8 to 44.7) | 644<br>(547 to 753)    | 287.9<br>(247.6 to 334.2) | 49 (41 to 58)       | 23.5 (20 to 27.4)      | 1569<br>(1306 to 1872)    | 669.2<br>(562.2 to 796.1)  | 48 (33 to 66)                      | 21.2<br>(14.5 to 29.2) | 1617<br>(1347 to 1927)                 | 690.3<br>(579.8 to 820.8)  | 180<br>(134 to 233)    | 49.4<br>(37.3 to 63.8) | 1411<br>(1084 to 1798)   | 384.9<br>(298.9 to 486.2) | 87 (66 to 112)        | 25.2<br>(19.5 to 32)   | 2743<br>(2028 to 3604)    | 737.9<br>(549.9 to 962.6)  | 104 (67 to 150)                    | 28.4<br>(18.5 to 40.7) | 2847<br>(2116 to 3727)                 | 766.2<br>(573.8 to 998.9) |
|               | Male   | 1 (1 to 1)          | 0.6 (0.5 to 0.7)       | 6 (5 to 7)             | 3 (2.4 to 3.7)            | 1 (1 to 1)          | 0.5 (0.4 to 0.6)       | 22 (18 to 28)             | 11.2 (9 to 14)             | 1 (0 to 1)                         | 0.3 (0.2 to 0.5)       | 23 (19 to 29)                          | 11.5<br>(9.3 to 14.3)      | 2 (1 to 2)             | 0.5 (0.4 to 0.7)       | 10 (7 to 13)             | 3.2 (2.4 to 4.3)          | 1 (1 to 2)            | 0.4 (0.3 to 0.6)       | 31 (22 to 42)             | 9.6 (6.9 to 12.8)          | 1 (1 to 1)                         | 0.3 (0.2 to 0.5)       | 32 (23 to 43)                          | 9.9 (7.2 to 13.3)         |
| Haiti         | Both   | 690<br>(531 to 894) | 18.5<br>(14.6 to 23.3) | 4520<br>(3488 to 5819) | 119.3<br>(95.7 to 148.7)  | 499<br>(391 to 634) | 14.3 (11 to 17.8)      | 17145<br>(12742 to 23131) | 429.6<br>(332 to 555.8)    | 368<br>(233 to 539)                | 9.7 (6.4 to 13.9)      | 17513<br>(12997 to 23650)              | 439.3<br>(339.8 to 568.9)  | 1962<br>(1246 to 2838) | 23.3 (15 to 33.2)      | 13665<br>(9069 to 19407) | 158.1<br>(108 to 218.7)   | 1214<br>(777 to 1746) | 15.5<br>(10.2 to 21.8) | 41645<br>(26388 to 62198) | 462<br>(296.1 to 672.6)    | 1064<br>(620 to 1699)              | 12.4<br>(7.4 to 19.2)  | 42709<br>(27127 to 63472)              | 474.4<br>(303.4 to 690.2) |
|               | Female | 682<br>(520 to 887) | 35.3<br>(27.6 to 44.6) | 4479<br>(3456 to 5762) | 229.4<br>(182.4 to 288.2) | 492<br>(386 to 628) | 26.8<br>(20.7 to 33.6) | 16942<br>(12579 to 22789) | 827.2<br>(637.7 to 1071.9) | 364<br>(230 to 532)                | 18.6<br>(12.2 to 26.6) | 17306<br>(12821 to 23301)              | 845.8<br>(651.3 to 1098.2) | 1944<br>(1233 to 2815) | 43.4 (28 to 62.1)      | 13568<br>(8981 to 19231) | 296<br>(201.8 to 408.7)   | 1199<br>(769 to 1725) | 28.8<br>(18.8 to 40.7) | 41240<br>(26066 to 61772) | 861.5<br>(552.1 to 1259.7) | 1054<br>(612 to 1687)              | 23.1<br>(13.8 to 35.9) | 42294<br>(26792 to 63036)              | 884.6<br>(564.1 to 1292)  |
|               | Male   | 8 (5 to 16)         | 0.5 (0.3 to 1)         | 41 (25 to 75)          | 2.5 (1.6 to 4.5)          | 7 (4 to 14)         | 0.5 (0.3 to 1)         | 203<br>(117 to 395)       | 12 (6.9 to 23.7)           | 4 (2 to 9)                         | 0.3 (0.2 to 0.6)       | 207<br>(119 to 404)                    | 12.3<br>(7.1 to 24.1)      | 18 (10 to 32)          | 0.6 (0.3 to 1)         | 97 (57 to 169)           | 2.8 (1.7 to 4.8)          | 15 (8 to 27)          | 0.5 (0.3 to 0.9)       | 405<br>(222 to 717)       | 11.4<br>(6.3 to 20.2)      | 10 (5 to 20)                       | 0.3 (0.2 to 0.6)       | 415<br>(226 to 734)                    | 11.8<br>(6.4 to 20.8)     |
| Honduras      | Both   | 179<br>(144 to 219) | 7.5 (6 to 9.1)         | 1383<br>(1145 to 1647) | 58.1<br>(48.3 to 68.6)    | 107 (86 to 131)     | 4.7 (3.8 to 5.7)       | 3647<br>(2953 to 4471)    | 144.5<br>(116.7 to 177.3)  | 103 (67 to 143)                    | 4.3 (2.8 to 5.9)       | 3750<br>(3034 to 4591)                 | 148.8<br>(120 to 182.3)    | 957<br>(670 to 1326)   | 14.5<br>(10.4 to 20)   | 7337<br>(5224 to 10109)  | 109.2<br>(79.4 to 149.1)  | 442<br>(324 to 600)   | 7.2 (5.4 to 9.5)       | 13230<br>(9282 to 18446)  | 193.9<br>(139.2 to 267.9)  | 551<br>(346 to 847)                | 8.3 (5.2 to 12.7)      | 13781<br>(9676 to 19199)               | 202.2<br>(145.3 to 279.2) |
|               | Female | 178<br>(144 to 219) | 14.6<br>(11.7 to 17.8) | 1378<br>(1140 to 1642) | 113.6<br>(94.6 to 134.2)  | 106 (86 to 130)     | 9.2 (7.3 to 11.1)      | 3629<br>(2934 to 4455)    | 282.3<br>(227.9 to 346.4)  | 102 (67 to 142)                    | 8.3 (5.5 to 11.5)      | 3731<br>(3017 to 4573)                 | 290.6<br>(234.4 to 356.1)  | 953<br>(666 to 1323)   | 27.3<br>(19.6 to 37.8) | 7315<br>(5208 to 10091)  | 205.6<br>(149.2 to 281.3) | 440<br>(321 to 597)   | 13.5<br>(10.1 to 17.9) | 13168<br>(9228 to 18392)  | 364.5<br>(261.3 to 503.6)  | 549<br>(343 to 845)                | 15.5<br>(9.8 to 23.9)  | 13716<br>(9621 to 19143)               | 380<br>(272.3 to 525.8)   |
|               | Male   | 1 (1 to 1)          | 0.1 (0 to 0.1)         | 5 (4 to 6)             | 0.4 (0.3 to 0.5)          | 1 (0 to 1)          | 0.1 (0 to 0.1)         | 19 (14 to 24)             | 1.5 (1.1 to 2.1)           | 0 (0 to 1)                         | 0 (0 to 0.1)           | 19 (14 to 25)                          | 1.6 (1.1 to 2.1)           | 4 (2 to 6)             | 0.1 (0.1 to 0.2)       | 22 (13 to 32)            | 0.7 (0.4 to 1.1)          | 3 (1 to 4)            | 0.1 (0.1 to 0.2)       | 62 (37 to 96)             | 2.1 (1.2 to 3.2)           | 2 (1 to 3)                         | 0.1 (0 to 0.1)         | 64 (39 to 99)                          | 2.1 (1.2 to 3.3)          |

|                            |        | 1990                      |                        |                              |                            |                           |                        |                               |                           |                                    |                        |                                        |                           | 2019                         |                        |                                    |                           |                            |                        |                                    |                           |                                    |                        |                                        |                           |
|----------------------------|--------|---------------------------|------------------------|------------------------------|----------------------------|---------------------------|------------------------|-------------------------------|---------------------------|------------------------------------|------------------------|----------------------------------------|---------------------------|------------------------------|------------------------|------------------------------------|---------------------------|----------------------------|------------------------|------------------------------------|---------------------------|------------------------------------|------------------------|----------------------------------------|---------------------------|
|                            |        | Incidence                 |                        | Prevalence                   |                            | Deaths                    |                        | YLLs (Years of Life Lost)     |                           | YLDs (Years Lived with Disability) |                        | DALYs (Disability-Adjusted Life Years) |                           | Incidence                    |                        | Prevalence                         |                           | Deaths                     |                        | YLLs (Years of Life Lost)          |                           | YLDs (Years Lived with Disability) |                        | DALYs (Disability-Adjusted Life Years) |                           |
| Location                   | Sex    | Number                    | Rate                   | Number                       | Rate                       | Number                    | Rate                   | Number                        | Rate                      | Number                             | Rate                   | Number                                 | Rate                      | Number                       | Rate                   | Number                             | Rate                      | Number                     | Rate                   | Number                             | Rate                      | Number                             | Rate                   | Number                                 | Rate                      |
| Hungary                    | Both   | 4642<br>(4378 to 4900)    | 33.7<br>(31.7 to 35.6) | 42989<br>(39473 to 46999)    | 308.4<br>(284 to 335.2)    | 2181<br>(2090 to 2267)    | 15.7<br>(15.1 to 16.3) | 56204<br>(54029 to 58264)     | 410.5<br>(394.7 to 425.4) | 3109<br>(2163 to 4184)             | 22.4<br>(15.6 to 30.2) | 59313<br>(56859 to 61751)              | 433<br>(414.8 to 450.1)   | 5974<br>(4874 to 7315)       | 35.4<br>(28.4 to 43.5) | 59493<br>(50633 to 70224)          | 346.9<br>(292.2 to 412.9) | 2207<br>(1813 to 2651)     | 11.8<br>(9.6 to 14.2)  | 47584<br>(38466 to 57601)          | 282.8<br>(227 to 344.3)   | 4147<br>(2820 to 5828)             | 24.5<br>(16.7 to 34.7) | 51732<br>(42000 to 62880)              | 307.3<br>(248.8 to 376.4) |
|                            | Female | 4592<br>(4319 to 4847)    | 60 (56.4 to 63.4)      | 42602<br>(39105 to 46617)    | 548.6<br>(505.6 to 598)    | 2156<br>(2065 to 2243)    | 26.8<br>(25.7 to 27.8) | 55614<br>(53476 to 57655)     | 737.3<br>(708.7 to 764.6) | 3071<br>(2136 to 4130)             | 40 (27.7 to 54)        | 58685<br>(56210 to 61094)              | 777.4<br>(744.3 to 808.6) | 5919<br>(4830 to 7251)       | 64 (51.1 to 79.1)      | 59017<br>(50169 to 69618)          | 624.9<br>(523.7 to 747.3) | 2187<br>(1795 to 2622)     | 20.1<br>(16.3 to 24.2) | 47144<br>(38100 to 57044)          | 511.4<br>(407.4 to 624.3) | 4104<br>(2793 to 5773)             | 44.4<br>(30.2 to 63.1) | 51248<br>(41612 to 62286)              | 555.8<br>(447.8 to 683.2) |
|                            | Male   | 50 (42 to 60)             | 0.8 (0.7 to 1)         | 386<br>(323 to 462)          | 6.4 (5.4 to 7.6)           | 25 (21 to 28)             | 0.4 (0.4 to 0.5)       | 590<br>(517 to 678)           | 9.7 (8.5 to 11)           | 38 (25 to 54)                      | 0.6 (0.4 to 0.9)       | 628<br>(546 to 720)                    | 10.3 (9 to 11.7)          | 55 (40 to 74)                | 0.7 (0.5 to 1)         | 476<br>(366 to 626)                | 6.3 (4.9 to 8.1)          | 20 (16 to 26)              | 0.3 (0.2 to 0.3)       | 441<br>(337 to 566)                | 5.9 (4.5 to 7.4)          | 43 (28 to 65)                      | 0.6 (0.4 to 0.9)       | 484<br>(370 to 617)                    | 6.4 (5 to 8.1)            |
| Iceland                    | Both   | 126<br>(114 to 139)       | 47.1<br>(42.6 to 52)   | 1347<br>(1202 to 1499)       | 498.2<br>(446.8 to 552.6)  | 39 (36 to 42)             | 14.1 (13 to 15.3)      | 965<br>(890 to 1043)          | 365.5<br>(336.5 to 395)   | 96 (66 to 131)                     | 35.7<br>(24.6 to 49.2) | 1061<br>(976 to 1151)                  | 401.2<br>(369 to 435)     | 173<br>(145 to 203)          | 35.2<br>(29.7 to 41.1) | 2054<br>(1820 to 2312)             | 406.7<br>(359.5 to 460.6) | 43 (36 to 49)              | 7.7 (6.7 to 8.7)       | 917<br>(801 to 1029)               | 188.7<br>(166 to 212.1)   | 138 (95 to 194)                    | 27.8<br>(18.9 to 39)   | 1055<br>(921 to 1186)                  | 216.4<br>(189.1 to 242.7) |
|                            | Female | 121<br>(109 to 134)       | 88 (79.4 to 97.3)      | 1309<br>(1170 to 1459)       | 932.7<br>(835.2 to 1036.5) | 37 (34 to 40)             | 25.4<br>(23.3 to 27.6) | 926<br>(853 to 1004)          | 685.2<br>(630.9 to 743)   | 92 (63 to 127)                     | 66.6<br>(45.7 to 92.4) | 1019<br>(934 to 1105)                  | 751.8<br>(690.3 to 815.4) | 168<br>(140 to 196)          | 67.5<br>(56.9 to 78.9) | 1997<br>(1766 to 2251)             | 779.6<br>(685.9 to 884.8) | 41 (35 to 47)              | 14.2<br>(12.2 to 16.1) | 884<br>(772 to 993)                | 361.3<br>(317.2 to 406.6) | 133 (91 to 187)                    | 53.1 (36 to 74.4)      | 1017<br>(886 to 1145)                  | 414.4<br>(361.9 to 467.6) |
|                            | Male   | 5 (4 to 6)                | 3.6 (2.9 to 4.4)       | 38 (31 to 46)                | 29.2<br>(24.1 to 35.2)     | 2 (2 to 2)                | 1.4 (1.2 to 1.6)       | 39 (33 to 44)                 | 30.1 (26 to 34.3)         | 4 (2 to 5)                         | 2.7 (1.8 to 3.9)       | 42 (36 to 49)                          | 32.8<br>(28.2 to 37.7)    | 6 (4 to 7)                   | 2.3 (1.7 to 2.9)       | 57 (46 to 70)                      | 22.3 (18 to 27.1)         | 2 (1 to 2)                 | 0.6 (0.5 to 0.8)       | 33 (26 to 39)                      | 13 (10.6 to 15.5)         | 5 (3 to 7)                         | 1.9 (1.2 to 2.7)       | 37 (31 to 45)                          | 14.9<br>(12.2 to 17.8)    |
| India                      | Both   | 37212<br>(30838 to 43917) | 7 (5.8 to 8.3)         | 275530<br>(239155 to 315685) | 52.2<br>(45.3 to 59.8)     | 26924<br>(22338 to 31252) | 5.6 (4.6 to 6.5)       | 917493<br>(767363 to 1064024) | 159.5<br>(132.6 to 185.3) | 21701<br>(14945 to 29194)          | 4 (2.8 to 5.4)         | 939194<br>(785949 to 1085775)          | 163.5<br>(136.2 to 189.5) | 146090<br>(112452 to 183482) | 11.8<br>(9.1 to 14.8)  | 112165<br>1<br>(888873 to 1382804) | 89.8<br>(71.6 to 109.9)   | 83510<br>(64550 to 105994) | 7.1 (5.5 to 9)         | 260954<br>5<br>(200294 to 3335792) | 204.9<br>(157.6 to 261.7) | 87805<br>(57874 to 126407)         | 7 (4.6 to 10)          | 269735<br>0<br>(209017 to 3424541)     | 212<br>(164.2 to 268.6)   |
|                            | Female | 35840<br>(29545 to 42492) | 13.9<br>(11.3 to 16.5) | 267361<br>(230585 to 307320) | 104.9<br>(90.8 to 120.8)   | 25779<br>(21135 to 30096) | 10.8<br>(8.8 to 12.7)  | 886376<br>(734054 to 1033786) | 319.7<br>(262.4 to 372.8) | 20885<br>(14334 to 28207)          | 8 (5.5 to 10.7)        | 907261<br>(754255 to 1055763)          | 327.6<br>(270.1 to 380.6) | 144086<br>(110434 to 181150) | 23 (17.8 to 29)        | 110654<br>7<br>(874593 to 1364804) | 175.7<br>(139.1 to 215.7) | 82099<br>(63114 to 104727) | 13.7<br>(10.6 to 17.3) | 257282<br>6<br>(196354 to 3297949) | 402.7<br>(308 to 515.9)   | 86417<br>(56726 to 124669)         | 13.7 (9 to 19.7)       | 265924<br>3<br>(204987 to 3389998)     | 416.4<br>(321 to 530.3)   |
|                            | Male   | 1371<br>(1089 to 1682)    | 0.7 (0.6 to 0.9)       | 8169<br>(6709 to 9762)       | 3.5 (2.9 to 4.2)           | 1146<br>(922 to 1393)     | 0.7 (0.5 to 0.8)       | 31117<br>(24915 to 38031)     | 13.2<br>(10.7 to 16.1)    | 816<br>(526 to 1135)               | 0.4 (0.2 to 0.5)       | 31933<br>(25582 to 38924)              | 13.6 (11 to 16.5)         | 2004<br>(1542 to 2530)       | 0.4 (0.3 to 0.5)       | 15104<br>(12100 to 18408)          | 2.7 (2.2 to 3.3)          | 1411<br>(1083 to 1745)     | 0.3 (0.2 to 0.4)       | 36719<br>(28022 to 45830)          | 6.3 (4.8 to 7.8)          | 1388<br>(932 to 1942)              | 0.3 (0.2 to 0.3)       | 38107<br>(29317 to 47166)              | 6.5 (5.1 to 8.1)          |
| Indonesia                  | Both   | 17057<br>(14515 to 20365) | 13.1<br>(11.2 to 15.4) | 134190<br>(116094 to 156424) | 106.4<br>(93.2 to 123.1)   | 11019<br>(9467 to 13091)  | 9.1 (7.8 to 10.7)      | 423161<br>(359596 to 507409)  | 310<br>(265.6 to 368.9)   | 10508<br>(7068 to 14575)           | 8 (5.5 to 11)          | 433669<br>(369069 to 519270)           | 318<br>(273.5 to 378)     | 50985<br>(39200 to 66927)    | 19.1<br>(14.9 to 24.7) | 432756<br>(349659 to 542892)       | 162.7<br>(133.3 to 202.2) | 26420<br>(20392 to 33925)  | 10.7<br>(8.4 to 13.5)  | 948050<br>(728692 to 1235076)      | 345.8<br>(266.9 to 446.7) | 32809<br>(21858 to 47605)          | 12.2<br>(8.2 to 17.5)  | 980859<br>(763277 to 1264306)          | 358<br>(279.5 to 457.6)   |
|                            | Female | 16967<br>(14431 to 20287) | 25.4<br>(21.8 to 30)   | 133550<br>(115464 to 155872) | 206<br>(180.3 to 238.5)    | 10944<br>(9391 to 13019)  | 17.5 (15 to 20.6)      | 421050<br>(356946 to 505580)  | 605.3<br>(517.4 to 721.7) | 10448<br>(7028 to 14502)           | 15.6<br>(10.6 to 21.3) | 431498<br>(366693 to 517352)           | 620.8<br>(533.2 to 739)   | 50628<br>(38906 to 66656)    | 37.4 (29 to 48.6)      | 430401<br>(347084 to 541008)       | 318.9<br>(259.6 to 397.8) | 26166<br>(20171 to 33676)  | 20.5<br>(15.9 to 25.9) | 941238<br>(722445 to 1227283)      | 680.8<br>(523.7 to 882.7) | 32571<br>(21708 to 47413)          | 23.9<br>(16.1 to 34.6) | 973809<br>(757445 to 1257968)          | 704.7<br>(549.2 to 905.8) |
|                            | Male   | 91 (67 to 120)            | 0.2 (0.1 to 0.3)       | 640<br>(498 to 821)          | 1.3 (1 to 1.6)             | 75 (56 to 98)             | 0.2 (0.1 to 0.2)       | 2111<br>(1577 to 2784)        | 4 (3 to 5.3)              | 60 (38 to 87)                      | 0.1 (0.1 to 0.2)       | 2171<br>(1631 to 2854)                 | 4.1 (3.1 to 5.4)          | 357<br>(230 to 532)          | 0.4 (0.2 to 0.5)       | 2355<br>(1632 to 3323)             | 2.2 (1.5 to 3)            | 254<br>(166 to 372)        | 0.3 (0.2 to 0.4)       | 6812<br>(4463 to 9924)             | 6.1 (4.1 to 8.9)          | 238<br>(138 to 375)                | 0.2 (0.1 to 0.4)       | 7050<br>(4639 to 10183)                | 6.4 (4.2 to 9.2)          |
| Iran (Islamic Republic of) | Both   | 2871<br>(2389 to 3608)    | 9.3 (7.5 to 11.8)      | 26458<br>(22494 to 31775)    | 87.9<br>(73.7 to 106)      | 1436<br>(1186 to 1823)    | 5.1 (4.1 to 6.7)       | 48718<br>(41357 to 60770)     | 150.8<br>(125.9 to 188.8) | 1929<br>(1304 to 2771)             | 6.2 (4.2 to 9)         | 50647<br>(43014 to 62892)              | 157<br>(130.7 to 198.1)   | 14863<br>(13372 to 16590)    | 17.1<br>(15.4 to 19.1) | 135257<br>(122011 to 150481)       | 156.9<br>(141.7 to 173.7) | 4760<br>(4362 to 5250)     | 6 (5.5 to 6.6)         | 153082<br>(140075 to 168502)       | 174.1<br>(159.6 to 191.6) | 10009<br>(6956 to 13776)           | 11.5 (8 to 15.8)       | 163091<br>(148806 to 179221)           | 185.6<br>(169.7 to 203.4) |

|          |        | 1990                   |                        |                           |                           |                        |                       |                           |                           |                                    |                       |                                        |                           | 2019                      |                      |                              |                           |                        |                        |                              |                           |                                    |                        |                                        |                           |
|----------|--------|------------------------|------------------------|---------------------------|---------------------------|------------------------|-----------------------|---------------------------|---------------------------|------------------------------------|-----------------------|----------------------------------------|---------------------------|---------------------------|----------------------|------------------------------|---------------------------|------------------------|------------------------|------------------------------|---------------------------|------------------------------------|------------------------|----------------------------------------|---------------------------|
|          |        | Incidence              |                        | Prevalence                |                           | Deaths                 |                       | YLLs (Years of Life Lost) |                           | YLDs (Years Lived with Disability) |                       | DALYs (Disability-Adjusted Life Years) |                           | Incidence                 |                      | Prevalence                   |                           | Deaths                 |                        | YLLs (Years of Life Lost)    |                           | YLDs (Years Lived with Disability) |                        | DALYs (Disability-Adjusted Life Years) |                           |
| Location | Sex    | Number                 | Rate                   | Number                    | Rate                      | Number                 | Rate                  | Number                    | Rate                      | Number                             | Rate                  | Number                                 | Rate                      | Number                    | Rate                 | Number                       | Rate                      | Number                 | Rate                   | Number                       | Rate                      | Number                             | Rate                   | Number                                 | Rate                      |
|          | Female | 2835<br>(2352 to 3575) | 18.8<br>(15.3 to 24.1) | 26160<br>(22174 to 31486) | 178.6<br>(149.7 to 216.4) | 1413<br>(1160 to 1796) | 10.3<br>(8.2 to 13.6) | 48016<br>(40680 to 59999) | 307.6<br>(255.7 to 386.4) | 1903<br>(1285 to 2739)             | 12.6<br>(8.5 to 18.4) | 49919<br>(42208 to 62170)              | 320.2<br>(265.4 to 405.4) | 14743<br>(13248 to 16469) | 34 (30.7 to 37.9)    | 134187<br>(120955 to 149206) | 312.1<br>(281.5 to 345.4) | 4704<br>(4306 to 5192) | 11.9<br>(10.8 to 13.1) | 151570<br>(138503 to 166910) | 345.9<br>(316.9 to 380.9) | 9916<br>(6887 to 13657)            | 22.8<br>(15.9 to 31.4) | 161486<br>(147227 to 177500)           | 368.7<br>(336.7 to 404.3) |
|          | Male   | 36 (27 to 48)          | 0.2 (0.2 to 0.3)       | 298 (233 to 383)          | 2 (1.6 to 2.6)            | 23 (18 to 30)          | 0.2 (0.1 to 0.2)      | 702 (550 to 895)          | 4.3 (3.4 to 5.6)          | 26 (17 to 38)                      | 0.2 (0.1 to 0.3)      | 728 (574 to 926)                       | 4.5 (3.5 to 5.8)          | 120 (98 to 143)           | 0.3 (0.3 to 0.4)     | 1070 (886 to 1280)           | 2.8 (2.3 to 3.3)          | 56 (48 to 63)          | 0.2 (0.1 to 0.2)       | 1512 (1296 to 1689)          | 3.8 (3.2 to 4.2)          | 93 (62 to 133)                     | 0.2 (0.2 to 0.3)       | 1605 (1379 to 1790)                    | 4 (3.5 to 4.5)            |
| Iraq     | Both   | 1351 (985 to 1837)     | 14.6 (10.6 to 20)      | 10976 (8508 to 14153)     | 120.7 (94.4 to 154.6)     | 772 (560 to 1057)      | 8.8 (6.4 to 12.1)     | 26921 (19629 to 36630)    | 283.2 (204.8 to 386.9)    | 842 (525 to 1269)                  | 9.1 (5.5 to 13.6)     | 27763 (20292 to 37907)                 | 292.3 (212.2 to 399.4)    | 7902 (5795 to 10587)      | 26.2 (19.7 to 34.7)  | 67929 (51815 to 88894)       | 227.2 (177.5 to 292.9)    | 3015 (2252 to 3985)    | 11.1 (8.5 to 14.4)     | 105319 (76701 to 142639)     | 342.7 (254.4 to 457.9)    | 5093 (3251 to 7684)                | 16.8 (10.9 to 24.6)    | 110411 (80899 to 149282)               | 359.5 (267.4 to 478.9)    |
|          | Female | 1337 (970 to 1824)     | 29 (21 to 40)          | 10887 (8421 to 14073)     | 239.4 (186 to 307.6)      | 762 (548 to 1046)      | 17.3 (12.5 to 23.8)   | 26651 (19302 to 36443)    | 565.4 (406.8 to 773.4)    | 833 (520 to 1258)                  | 18 (11 to 27.2)       | 27485 (19934 to 37671)                 | 583.4 (421.5 to 798.3)    | 7819 (5733 to 10484)      | 52 (38.9 to 68.9)    | 67317 (51236 to 88245)       | 451.6 (351.6 to 583.5)    | 2970 (2217 to 3930)    | 21.6 (16.4 to 28.1)    | 103998 (75526 to 140725)     | 681.6 (505 to 909.9)      | 5035 (3203 to 7606)                | 33.3 (21.6 to 49)      | 109032 (79889 to 147823)               | 714.9 (529.9 to 957.2)    |
|          | Male   | 13 (9 to 19)           | 0.3 (0.2 to 0.5)       | 89 (63 to 122)            | 2.2 (1.6 to 3)            | 10 (7 to 15)           | 0.3 (0.2 to 0.4)      | 270 (179 to 388)          | 6.5 (4.2 to 9.2)          | 9 (5 to 14)                        | 0.2 (0.1 to 0.3)      | 279 (185 to 400)                       | 6.7 (4.4 to 9.5)          | 83 (54 to 119)            | 0.7 (0.4 to 0.9)     | 612 (402 to 864)             | 4.8 (3.3 to 6.6)          | 45 (31 to 62)          | 0.4 (0.3 to 0.5)       | 1321 (855 to 1900)           | 9.9 (6.7 to 13.6)         | 58 (34 to 92)                      | 0.5 (0.3 to 0.7)       | 1379 (892 to 1980)                     | 10.4 (7 to 14.2)          |
| Ireland  | Both   | 1842 (1700 to 1970)    | 49 (45.1 to 52.4)      | 19034 (17299 to 20939)    | 499.1 (456.5 to 547.1)    | 682 (648 to 714)       | 17.9 (16.9 to 18.7)   | 17474 (16719 to 18224)    | 470.1 (448.9 to 490.2)    | 1366 (970 to 1850)                 | 36 (25.5 to 48.8)     | 18841 (17963 to 19796)                 | 506.2 (482 to 531.3)      | 3408 (2616 to 4345)       | 49.2 (37.4 to 62.8)  | 37096 (30531 to 44804)       | 529.2 (429.9 to 643.5)    | 804 (724 to 886)       | 11 (9.9 to 12)         | 18000 (16521 to 19641)       | 260.6 (238.9 to 284.6)    | 2596 (1708 to 3792)                | 37.4 (24.5 to 54.7)    | 20595 (18570 to 22919)                 | 298 (269.1 to 332.5)      |
|          | Female | 1833 (1692 to 1961)    | 93.7 (86.3 to 100.6)   | 18949 (17223 to 20854)    | 948.6 (867.5 to 1036.5)   | 678 (644 to 710)       | 32.8 (31.2 to 34.3)   | 17382 (16627 to 18130)    | 906.4 (865.5 to 946.5)    | 1358 (963 to 1840)                 | 68.8 (48.5 to 93.4)   | 18740 (17869 to 19698)                 | 975.2 (928.8 to 1024.9)   | 3386 (2599 to 4323)       | 95 (72 to 121.5)     | 36885 (30382 to 44537)       | 1020.2 (826.8 to 1243.4)  | 798 (718 to 879)       | 20.5 (18.6 to 22.4)    | 17873 (16418 to 19520)       | 502.3 (460.3 to 548.3)    | 2577 (1690 to 3761)                | 72 (47.1 to 105.9)     | 20450 (18431 to 22766)                 | 574.4 (517.6 to 641.5)    |
|          | Male   | 9 (7 to 11)            | 0.5 (0.4 to 0.6)       | 85 (69 to 103)            | 4.7 (3.9 to 5.6)          | 4 (3 to 5)             | 0.2 (0.2 to 0.3)      | 93 (80 to 108)            | 5.1 (4.4 to 5.9)          | 8 (5 to 11)                        | 0.4 (0.3 to 0.6)      | 101 (88 to 118)                        | 5.5 (4.8 to 6.4)          | 22 (15 to 31)             | 0.6 (0.4 to 0.9)     | 211 (155 to 288)             | 6.1 (4.6 to 8.3)          | 6 (5 to 8)             | 0.2 (0.1 to 0.2)       | 127 (100 to 155)             | 3.8 (3 to 4.6)            | 19 (11 to 29)                      | 0.5 (0.3 to 0.8)       | 145 (114 to 180)                       | 4.3 (3.4 to 5.3)          |
| Israel   | Both   | 1893 (1760 to 2022)    | 41.1 (38.2 to 43.8)    | 19904 (17992 to 22073)    | 426.9 (386.8 to 471.6)    | 797 (756 to 837)       | 17.4 (16.4 to 18.2)   | 21013 (20158 to 21919)    | 459.8 (441.3 to 479.5)    | 1406 (974 to 1924)                 | 30.3 (21 to 41.6)     | 22419 (21423 to 23545)                 | 490 (467.9 to 513.7)      | 4464 (3441 to 5702)       | 41.8 (32 to 53.4)    | 48155 (39704 to 57606)       | 447.4 (366.6 to 537.7)    | 1361 (1231 to 1476)    | 11.8 (10.7 to 12.7)    | 29489 (27287 to 31666)       | 278.5 (258.4 to 298.7)    | 3365 (2197 to 4829)                | 31.5 (20.5 to 45.6)    | 32853 (30058 to 35655)                 | 310 (284.5 to 337)        |
|          | Female | 1878 (1746 to 2008)    | 76.9 (71.4 to 82.2)    | 19770 (17866 to 21930)    | 796.2 (721.5 to 878.4)    | 789 (749 to 829)       | 32.1 (30.4 to 33.7)   | 20842 (19992 to 21742)    | 862.6 (827.7 to 900)      | 1394 (966 to 1909)                 | 56.5 (39.2 to 77.9)   | 22236 (21239 to 23354)                 | 919.1 (877.7 to 963.8)    | 4410 (3398 to 5635)       | 78.8 (60.2 to 100.9) | 47673 (39271 to 57043)       | 842.9 (689.8 to 1017.1)   | 1341 (1213 to 1457)    | 21.5 (19.6 to 23.1)    | 29102 (26916 to 31204)       | 525.2 (486.9 to 563.5)    | 3321 (2167 to 4768)                | 59.4 (38.5 to 86.1)    | 32423 (29665 to 35176)                 | 584.6 (536.8 to 635.2)    |
|          | Male   | 15 (12 to 18)          | 0.7 (0.6 to 0.8)       | 134 (112 to 161)          | 6.1 (5.1 to 7.2)          | 8 (7 to 10)            | 0.4 (0.3 to 0.4)      | 171 (148 to 198)          | 7.9 (6.8 to 9)            | 12 (8 to 17)                       | 0.5 (0.4 to 0.8)      | 183 (157 to 212)                       | 8.4 (7.2 to 9.7)          | 54 (38 to 74)             | 1 (0.7 to 1.4)       | 481 (359 to 635)             | 9.3 (7 to 12.3)           | 20 (16 to 24)          | 0.4 (0.3 to 0.5)       | 386 (315 to 466)             | 7.6 (6.2 to 9.1)          | 44 (27 to 68)                      | 0.8 (0.5 to 1.3)       | 430 (351 to 519)                       | 8.4 (6.9 to 10.2)         |
| Italy    | Both   | 37884 (35702 to 40229) | 47.9 (45.1 to 50.8)    | 422764 (384546 to 465244) | 520.7 (477 to 568.5)      | 12299 (11797 to 12594) | 14.8 (14.1 to 15.1)   | 303888 (295148 to 309993) | 386.8 (376.3 to 394.7)    | 28958 (19976 to 40025)             | 36.2 (25 to 50.2)     | 332846 (320422 to 346045)              | 423.1 (407.5 to 439.6)    | 53565 (41369 to 68124)    | 47.1 (36.4 to 60.5)  | 625993 (520330 to 746939)    | 530 (438.1 to 643)        | 14450 (12591 to 15499) | 10.2 (9.2 to 10.9)     | 278990 (256976 to 295069)    | 244.5 (230.7 to 257.7)    | 41936 (27292 to 61004)             | 36.6 (23.3 to 53.8)    | 320926 (294648 to 346641)              | 281.1 (260.6 to 302.8)    |
|          | Female | 37782 (35596 to 40124) | 88.9 (83.7 to 94.4)    | 421458 (383261 to 463738) | 954 (875.9 to 1039.7)     | 12260 (11759 to 12555) | 26.2 (25.2 to 26.8)   | 302956 (294221 to 309071) | 721.3 (702.9 to 735.6)    | 28859 (19911 to 39884)             | 67 (46.2 to 93.1)     | 331815 (319382 to 345002)              | 788.3 (759.9 to 818.8)    | 53095 (40906 to 67752)    | 89.2 (68.5 to 114.9) | 621334 (515663 to 742482)    | 998.5 (821.6 to 1217.2)   | 14309 (12454 to 15346) | 18.5 (16.8 to 19.6)    | 276333 (254466 to 292367)    | 461.6 (436.5 to 486.3)    | 41533 (26983 to 60577)             | 69.1 (44 to 101.9)     | 317865 (291748 to 343491)              | 530.8 (492.6 to 571.8)    |
|          | Male   | 103 (88 to 119)        | 0.3 (0.2 to 0.3)       | 1306 (1110 to 1547)       | 3.6 (3.1 to 4.3)          | 39 (37 to 41)          | 0.1 (0.1 to 0.1)      | 931 (891 to 971)          | 2.5 (2.4 to 2.7)          | 100 (66 to 144)                    | 0.3 (0.2 to 0.4)      | 1031 (977 to 1094)                     | 2.8 (2.7 to 3)            | 470 (346 to 620)          | 0.8 (0.6 to 1.1)     | 4659 (3700 to 5872)          | 8 (6.3 to 10.1)           | 142 (127 to 156)       | 0.2 (0.2 to 0.2)       | 2657 (2430 to 2932)          | 4.8 (4.4 to 5.3)          | 403 (257 to 602)                   | 0.7 (0.4 to 1)         | 3061 (2754 to 3401)                    | 5.5 (5 to 6.1)            |
| Jamaica  | Both   | 395 (365 to 427)       | 23.3 (21.6 to 25.2)    | 3287 (3024 to 3583)       | 193.9 (178 to 211)        | 190 (178 to 203)       | 11 (10.3 to 11.8)     | 5070 (4736 to 5447)       | 301.5 (281 to 323.9)      | 236 (168 to 315)                   | 13.9 (9.9 to 18.5)    | 5307 (4950 to 5706)                    | 315.4 (294 to 340.1)      | 1224 (942 to 1553)        | 40.9 (31.5 to 52.1)  | 10107 (7933 to 12641)        | 339.7 (267.2 to 425.3)    | 472 (372 to 582)       | 15.5 (12.2 to 19.1)    | 13334 (10334 to 16933)       | 446.1 (343.9 to 566.8)    | 729 (478 to 1047)                  | 24.5 (16.1 to 35.3)    | 14062 (10953 to 17865)                 | 470.5 (366 to 597.6)      |

|            |        | 1990                      |                        |                              |                           |                        |                        |                              |                           |                                    |                        |                                        |                           | 2019                      |                         |                               |                           |                           |                        |                              |                            |                                    |                        |                                        |                            |
|------------|--------|---------------------------|------------------------|------------------------------|---------------------------|------------------------|------------------------|------------------------------|---------------------------|------------------------------------|------------------------|----------------------------------------|---------------------------|---------------------------|-------------------------|-------------------------------|---------------------------|---------------------------|------------------------|------------------------------|----------------------------|------------------------------------|------------------------|----------------------------------------|----------------------------|
|            |        | Incidence                 |                        | Prevalence                   |                           | Deaths                 |                        | YLLs (Years of Life Lost)    |                           | YLDs (Years Lived with Disability) |                        | DALYs (Disability-Adjusted Life Years) |                           | Incidence                 |                         | Prevalence                    |                           | Deaths                    |                        | YLLs (Years of Life Lost)    |                            | YLDs (Years Lived with Disability) |                        | DALYs (Disability-Adjusted Life Years) |                            |
| Location   | Sex    | Number                    | Rate                   | Number                       | Rate                      | Number                 | Rate                   | Number                       | Rate                      | Number                             | Rate                   | Number                                 | Rate                      | Number                    | Rate                    | Number                        | Rate                      | Number                    | Rate                   | Number                       | Rate                       | Number                             | Rate                   | Number                                 | Rate                       |
|            | Female | 391<br>(361 to 423)       | 44.1<br>(40.7 to 47.8) | 3261<br>(2998 to 3553)       | 368.2<br>(337.7 to 400.5) | 187<br>(175 to 200)    | 20.4<br>(19.1 to 21.8) | 5008<br>(4680 to 5379)       | 573<br>(533.5 to 616.2)   | 234<br>(167 to 312)                | 26.3<br>(18.7 to 35.1) | 5242<br>(4888 to 5642)                 | 599.4<br>(557.4 to 647.3) | 1212<br>(934 to 1538)     | 79.3<br>(60.9 to 100.9) | 10028<br>(7864 to 12546)      | 661<br>(517.8 to 827.5)   | 464<br>(367 to 571)       | 29.3<br>(23.1 to 36.4) | 13165<br>(10194 to 16735)    | 863.8<br>(665.1 to 1099.3) | 721<br>(472 to 1037)               | 47.4 (31 to 68.6)      | 13887<br>(10810 to 17654)              | 911.2<br>(706.6 to 1159.3) |
|            | Male   | 4 (3 to 5)                | 0.5 (0.4 to 0.6)       | 27 (22 to 32)                | 3.2 (2.7 to 3.8)          | 3 (2 to 4)             | 0.4 (0.3 to 0.4)       | 62 (52 to 74)                | 7.6 (6.4 to 8.9)          | 3 (2 to 3)                         | 0.3 (0.2 to 0.4)       | 65 (55 to 77)                          | 7.9 (6.7 to 9.3)          | 12 (8 to 16)              | 0.8 (0.6 to 1.2)        | 79 (57 to 109)                | 5.5 (4 to 7.6)            | 8 (5 to 10)               | 0.5 (0.4 to 0.8)       | 168 (119 to 233)             | 11.7 (8.3 to 16.1)         | 8 (5 to 12)                        | 0.5 (0.3 to 0.8)       | 176 (125 to 243)                       | 12.2 (8.7 to 16.8)         |
| Japan      | Both   | 31618<br>(29714 to 33638) | 19.1<br>(17.9 to 20.3) | 392788<br>(353059 to 441357) | 234.8<br>(211.1 to 262.9) | 7949<br>(7602 to 8154) | 4.8 (4.6 to 5)         | 235189<br>(228603 to 240092) | 142<br>(138 to 145)       | 26008<br>(17742 to 35857)          | 15.6<br>(10.7 to 21.5) | 261197<br>(250804 to 272729)           | 157.7<br>(151.4 to 164.5) | 74597<br>(59578 to 91312) | 31 (24.8 to 38.2)       | 887472<br>(754022 to 1045076) | 345.6<br>(288 to 411.2)   | 16038<br>(13489 to 17428) | 5.4 (4.8 to 5.7)       | 337888<br>(307244 to 359272) | 148.6<br>(139.8 to 157)    | 59886<br>(39369 to 85805)          | 24.3<br>(15.9 to 35.4) | 397774<br>(358070 to 434855)           | 173<br>(160.5 to 187.6)    |
|            | Female | 31483<br>(29570 to 33515) | 36.1<br>(33.9 to 38.4) | 391384<br>(351640 to 439792) | 435.9<br>(393.7 to 485.4) | 7889<br>(7544 to 8093) | 8.8 (8.4 to 9)         | 233797<br>(227226 to 238706) | 270.9<br>(263.8 to 276.4) | 25889<br>(17663 to 35692)          | 29.3 (20 to 40.4)      | 259686<br>(249314 to 271167)           | 300.3<br>(288.7 to 313)   | 74260<br>(59292 to 90978) | 60.5<br>(48.3 to 74.6)  | 884138<br>(750254 to 1041945) | 669.6<br>(555.6 to 799.4) | 15911<br>(13374 to 17288) | 10.1<br>(9.2 to 10.8)  | 335705<br>(305320 to 356935) | 290.8<br>(275.2 to 307.2)  | 59587<br>(39178 to 85407)          | 47.3<br>(30.8 to 68.9) | 395292<br>(355850 to 432122)           | 338.1<br>(314.5 to 366.5)  |
|            | Male   | 135<br>(119 to 156)       | 0.2 (0.2 to 0.2)       | 1404<br>(1194 to 1654)       | 2 (1.7 to 2.3)            | 59 (57 to 61)          | 0.1 (0.1 to 0.1)       | 1392<br>(1349 to 1436)       | 1.9 (1.8 to 2)            | 119 (81 to 167)                    | 0.2 (0.1 to 0.2)       | 1511<br>(1453 to 1579)                 | 2.1 (2 to 2.2)            | 337<br>(262 to 431)       | 0.2 (0.2 to 0.3)        | 3334<br>(2669 to 4107)        | 2.4 (2 to 3)              | 127<br>(113 to 139)       | 0.1 (0.1 to 0.1)       | 2183<br>(1997 to 2360)       | 1.7 (1.6 to 1.8)           | 299<br>(190 to 435)                | 0.2 (0.1 to 0.3)       | 2482<br>(2251 to 2717)                 | 1.9 (1.8 to 2.1)           |
| Jordan     | Both   | 306<br>(238 to 381)       | 17.7<br>(13.7 to 22.1) | 2549<br>(2100 to 3095)       | 150<br>(123.3 to 180.4)   | 163<br>(127 to 203)    | 10.5<br>(8.1 to 13.3)  | 5664<br>(4437 to 6955)       | 312.3<br>(242.4 to 385.3) | 193<br>(128 to 283)                | 11.1<br>(7.4 to 16.4)  | 5858<br>(4575 to 7202)                 | 323.4<br>(251.6 to 399.1) | 2075<br>(1591 to 2658)    | 24.9<br>(19.3 to 31.5)  | 18566<br>(14743 to 23262)     | 223.6<br>(180.6 to 272.1) | 685<br>(536 to 869)       | 9.5 (7.5 to 11.9)      | 22093<br>(17155 to 28430)    | 258.5<br>(202.4 to 328.5)  | 1384<br>(874 to 2001)              | 16.5<br>(10.6 to 23.6) | 23477<br>(18164 to 30109)              | 275<br>(214 to 348.5)      |
|            | Female | 301<br>(234 to 377)       | 35.9<br>(27.6 to 45.2) | 2519<br>(2065 to 3059)       | 305.2<br>(250.3 to 369.8) | 160<br>(123 to 200)    | 21 (15.9 to 26.7)      | 5582<br>(4339 to 6887)       | 637.2<br>(492.4 to 792.2) | 190<br>(126 to 279)                | 22.6<br>(14.9 to 33.4) | 5772<br>(4486 to 7096)                 | 659.8<br>(507.8 to 815.4) | 2053<br>(1576 to 2636)    | 52.9 (41 to 67.4)       | 18387<br>(14602 to 23089)     | 474.7<br>(383.1 to 580)   | 674<br>(526 to 858)       | 19.9<br>(15.6 to 24.9) | 21809<br>(16849 to 28024)    | 548.6<br>(427.6 to 698.7)  | 1368<br>(864 to 1982)              | 35 (22.3 to 50)        | 23176<br>(17862 to 29882)              | 583.6<br>(452.8 to 744.7)  |
|            | Male   | 4 (3 to 6)                | 0.7 (0.5 to 1)         | 30 (22 to 40)                | 4.3 (3.2 to 5.8)          | 3 (2 to 5)             | 0.6 (0.4 to 0.8)       | 82 (59 to 116)               | 11.4<br>(8.1 to 16.1)     | 3 (2 to 4)                         | 0.4 (0.3 to 0.7)       | 85 (61 to 120)                         | 11.8<br>(8.4 to 16.7)     | 22 (15 to 31)             | 0.6 (0.4 to 0.9)        | 180<br>(128 to 247)           | 4.9 (3.6 to 6.8)          | 11 (7 to 15)              | 0.4 (0.2 to 0.5)       | 285<br>(195 to 411)          | 7.5 (5.1 to 10.5)          | 16 (10 to 26)                      | 0.5 (0.3 to 0.7)       | 301<br>(206 to 433)                    | 7.9 (5.5 to 11.1)          |
| Kazakhstan | Both   | 2689<br>(2488 to 2890)    | 19.8<br>(18.4 to 21.2) | 23868<br>(21842 to 26148)    | 177.8<br>(162.9 to 195.4) | 1435<br>(1340 to 1529) | 11 (10.3 to 11.8)      | 44372<br>(41326 to 47524)    | 319.4<br>(297.9 to 341.9) | 1748<br>(1221 to 2422)             | 12.9 (9 to 17.8)       | 46120<br>(42923 to 49280)              | 332.3<br>(310 to 355.4)   | 4252<br>(3558 to 5002)    | 22.7<br>(19.1 to 26.5)  | 38603<br>(32942 to 44656)     | 206.7<br>(177.7 to 238)   | 1686<br>(1444 to 1956)    | 9.6 (8.3 to 11.1)      | 49054<br>(41397 to 57434)    | 258.2<br>(219.3 to 300.8)  | 2834<br>(1951 to 3958)             | 15.1<br>(10.4 to 20.9) | 51889<br>(43913 to 61260)              | 273.3<br>(231.4 to 319.6)  |
|            | Female | 2684<br>(2482 to 2885)    | 34.4<br>(31.9 to 37)   | 23823<br>(21802 to 26101)    | 305.8<br>(281.4 to 334.8) | 1432<br>(1337 to 1526) | 18.5<br>(17.3 to 19.7) | 44283<br>(41234 to 47427)    | 565.3<br>(527 to 605.4)   | 1744<br>(1218 to 2416)             | 22.3<br>(15.6 to 31.2) | 46028<br>(42826 to 49187)              | 587.6<br>(547.5 to 629)   | 4236<br>(3545 to 4985)    | 40.1<br>(33.6 to 47.1)  | 38481<br>(32838 to 44550)     | 364.2<br>(311.6 to 420.9) | 1679<br>(1437 to 1948)    | 16.3 (14 to 18.9)      | 48861<br>(41237 to 57225)    | 459.7<br>(389.6 to 537.6)  | 2822<br>(1942 to 3940)             | 26.7<br>(18.4 to 36.9) | 51683<br>(43723 to 61053)              | 486.4<br>(411.2 to 572.5)  |
|            | Male   | 5 (5 to 6)                | 0.1 (0.1 to 0.1)       | 45 (38 to 54)                | 0.8 (0.7 to 1)            | 3 (3 to 3)             | 0.1 (0.1 to 0.1)       | 89 (79 to 98)                | 1.6 (1.4 to 1.7)          | 4 (3 to 6)                         | 0.1 (0.1 to 0.1)       | 93 (83 to 103)                         | 1.6 (1.5 to 1.8)          | 16 (13 to 20)             | 0.2 (0.2 to 0.3)        | 122 (97 to 153)               | 1.7 (1.3 to 2.1)          | 7 (6 to 9)                | 0.1 (0.1 to 0.1)       | 194<br>(158 to 237)          | 2.6 (2.1 to 3.2)           | 12 (8 to 18)                       | 0.2 (0.1 to 0.2)       | 206<br>(168 to 252)                    | 2.8 (2.3 to 3.4)           |
| Kenya      | Both   | 755<br>(514 to 1096)      | 8.3 (5.8 to 11.8)      | 5205<br>(3758 to 7252)       | 55.5<br>(41.2 to 75.2)    | 564<br>(393 to 803)    | 6.7 (4.8 to 9.4)       | 17383<br>(11747 to 25493)    | 176.6<br>(121.3 to 253.5) | 437<br>(264 to 698)                | 4.6 (2.9 to 7.3)       | 17820<br>(12059 to 26135)              | 181.2<br>(124.4 to 260.7) | 3398<br>(2485 to 4509)    | 13.3 (10 to 17.3)       | 24004<br>(18125 to 31437)     | 88.5<br>(68.6 to 113.2)   | 2321<br>(1747 to 3132)    | 10.3<br>(7.9 to 13.4)  | 73574<br>(53850 to 102699)   | 263.4<br>(197.5 to 357.5)  | 2016<br>(1278 to 3014)             | 7.5 (4.9 to 11)        | 75590<br>(55661 to 104567)             | 270.9<br>(203.3 to 365.8)  |
|            | Female | 668<br>(441 to 1003)      | 13.9<br>(9.3 to 20.5)  | 4770<br>(3378 to 6749)       | 97.9<br>(71.1 to 134.6)   | 484<br>(325 to 711)    | 10.8<br>(7.4 to 15.7)  | 15649<br>(10251 to 23562)    | 304.3<br>(201.7 to 451.7) | 390<br>(230 to 628)                | 7.9 (4.8 to 12.5)      | 16039<br>(10541 to 24116)              | 312.2<br>(207.6 to 461.8) | 3162<br>(2250 to 4323)    | 23 (16.6 to 30.6)       | 22702<br>(16737 to 30261)     | 158.4<br>(120.2 to 207)   | 2124<br>(1547 to 2902)    | 17 (12.7 to 22.8)      | 68797<br>(48989 to 96488)    | 466.9<br>(338 to 642.2)    | 1880<br>(1179 to 2881)             | 13.1<br>(8.4 to 19.7)  | 70676<br>(50797 to 98743)              | 480<br>(350.6 to 658)      |
|            | Male   | 86 (62 to 138)            | 2.5 (1.8 to 3.9)       | 434<br>(322 to 665)          | 11.6<br>(8.7 to 17.4)     | 80 (58 to 122)         | 2.5 (1.8 to 3.7)       | 1735<br>(1213 to 2736)       | 45.2<br>(32.2 to 70.3)    | 46 (28 to 76)                      | 1.3 (0.8 to 2)         | 1781<br>(1246 to 2811)                 | 46.5 (33 to 72.3)         | 236<br>(161 to 365)       | 2.8 (1.9 to 4.2)        | 1302<br>(917 to 1972)         | 13.5<br>(9.8 to 19.9)     | 197<br>(137 to 298)       | 2.6 (1.8 to 3.9)       | 4777<br>(3295 to 7315)       | 47.7<br>(33.1 to 72)       | 136 (80 to 221)                    | 1.5 (0.9 to 2.3)       | 4913<br>(3406 to 7568)                 | 49.2<br>(34.4 to 73.8)     |
| Kiribati   | Both   | 9 (7 to 11)               | 20.5<br>(16.1 to 25.1) | 66 (54 to 79)                | 150.3<br>(125.3 to 177.2) | 7 (5 to 8)             | 16.7<br>(13.1 to 20.4) | 237<br>(184 to 293)          | 500.4<br>(392.2 to 621.2) | 5 (4 to 7)                         | 11.7<br>(7.9 to 16.2)  | 242<br>(188 to 300)                    | 512.1<br>(401.4 to 635.7) | 21 (15 to 28)             | 26 (19 to 35.7)         | 150<br>(113 to 195)           | 180.5<br>(141.2 to 231.7) | 14 (10 to 20)             | 20.1<br>(14.9 to 27.4) | 488<br>(344 to 673)          | 562.6<br>(404.1 to 775)    | 12 (8 to 18)                       | 14.5<br>(9.4 to 21.6)  | 500<br>(352 to 686)                    | 577.1<br>(415 to 790.4)    |

|                                  |        | 1990              |                     |                      |                        |                  |                     |                           |                         |                                    |                     |                                        |                         | 2019                |                       |                        |                          |                    |                     |                           |                         |                                    |                     |                                        |                          |
|----------------------------------|--------|-------------------|---------------------|----------------------|------------------------|------------------|---------------------|---------------------------|-------------------------|------------------------------------|---------------------|----------------------------------------|-------------------------|---------------------|-----------------------|------------------------|--------------------------|--------------------|---------------------|---------------------------|-------------------------|------------------------------------|---------------------|----------------------------------------|--------------------------|
|                                  |        | Incidence         |                     | Prevalence           |                        | Deaths           |                     | YLLs (Years of Life Lost) |                         | YLDs (Years Lived with Disability) |                     | DALYs (Disability-Adjusted Life Years) |                         | Incidence           |                       | Prevalence             |                          | Deaths             |                     | YLLs (Years of Life Lost) |                         | YLDs (Years Lived with Disability) |                     | DALYs (Disability-Adjusted Life Years) |                          |
| Location                         | Sex    | Number            | Rate                | Number               | Rate                   | Number           | Rate                | Number                    | Rate                    | Number                             | Rate                | Number                                 | Rate                    | Number              | Rate                  | Number                 | Rate                     | Number             | Rate                | Number                    | Rate                    | Number                             | Rate                | Number                                 | Rate                     |
|                                  | Female | 9 (7 to 11)       | 37.5 (29.5 to 46.4) | 65 (54 to 78)        | 276 (229.5 to 326.5)   | 7 (5 to 8)       | 30 (23.5 to 36.8)   | 235 (183 to 292)          | 934.8 (732.2 to 1163.1) | 5 (3 to 7)                         | 21.5 (14.4 to 29.9) | 241 (187 to 298)                       | 956.2 (748.1 to 1189.2) | 21 (15 to 28)       | 46 (33.6 to 63.5)     | 149 (112 to 194)       | 322.5 (249.9 to 416.6)   | 14 (10 to 20)      | 34.6 (25.5 to 47.6) | 486 (343 to 671)          | 1015.6 (726 to 1406.5)  | 12 (7 to 18)                       | 25.9 (16.6 to 38.5) | 498 (350 to 683)                       | 1041.6 (741.9 to 1433.2) |
|                                  | Male   | 0 (0 to 0)        | 0.3 (0.2 to 0.4)    | 0 (0 to 0)           | 1.5 (1.1 to 2)         | 0 (0 to 0)       | 0.3 (0.2 to 0.3)    | 1 (1 to 2)                | 6.2 (4.3 to 8.4)        | 0 (0 to 0)                         | 0.2 (0.1 to 0.2)    | 1 (1 to 2)                             | 6.3 (4.4 to 8.6)        | 0 (0 to 0)          | 0.3 (0.2 to 0.5)      | 1 (0 to 1)             | 1.9 (1.4 to 2.7)         | 0 (0 to 0)         | 0.3 (0.2 to 0.4)    | 3 (2 to 4)                | 7.3 (4.8 to 10.8)       | 0 (0 to 0)                         | 0.2 (0.1 to 0.3)    | 3 (2 to 4)                             | 7.6 (4.9 to 11.1)        |
| Kuwait                           | Both   | 147 (133 to 164)  | 15.5 (14.1 to 17.1) | 1304 (1175 to 1453)  | 141.1 (127.8 to 156)   | 52 (48 to 57)    | 7.1 (6.4 to 7.7)    | 1812 (1652 to 1997)       | 184.3 (168.6 to 200.8)  | 99 (67 to 139)                     | 10.3 (7.1 to 14.2)  | 1911 (1748 to 2115)                    | 194.6 (178.1 to 212.9)  | 724 (570 to 930)    | 18.1 (14.6 to 23.2)   | 6817 (5541 to 8582)    | 178 (149.1 to 218.6)     | 171 (138 to 218)   | 5.5 (4.5 to 6.9)    | 5650 (4512 to 7374)       | 140 (112.6 to 180.2)    | 498 (329 to 737)                   | 12.5 (8.4 to 18.1)  | 6148 (4902 to 7991)                    | 152.5 (124 to 195.6)     |
|                                  | Female | 145 (131 to 162)  | 41.3 (37.6 to 45.8) | 1289 (1160 to 1439)  | 376.7 (340.9 to 415)   | 51 (47 to 55)    | 17.7 (16.1 to 19.4) | 1785 (1626 to 1971)       | 499 (456.1 to 545.3)    | 98 (66 to 137)                     | 27.5 (18.9 to 38.1) | 1883 (1719 to 2086)                    | 526.5 (481.8 to 578.8)  | 716 (563 to 923)    | 42.8 (34.4 to 54.7)   | 6751 (5464 to 8513)    | 423.8 (355.1 to 521.9)   | 168 (135 to 215)   | 13 (10.6 to 16.6)   | 5573 (4443 to 7306)       | 329.4 (264.7 to 426.1)  | 492 (324 to 730)                   | 29.5 (19.9 to 42.9) | 6066 (4831 to 7893)                    | 358.8 (290.3 to 461.8)   |
|                                  | Male   | 2 (1 to 2)        | 0.5 (0.4 to 0.7)    | 15 (12 to 19)        | 3.8 (3 to 4.9)         | 1 (1 to 1)       | 0.3 (0.3 to 0.4)    | 27 (22 to 34)             | 6.4 (5.2 to 8.1)        | 1 (1 to 2)                         | 0.4 (0.2 to 0.5)    | 28 (23 to 35)                          | 6.8 (5.4 to 8.6)        | 8 (5 to 11)         | 0.5 (0.4 to 0.8)      | 66 (48 to 92)          | 4.2 (3 to 5.9)           | 3 (2 to 5)         | 0.2 (0.2 to 0.4)    | 77 (55 to 110)            | 4.6 (3.3 to 6.7)        | 6 (4 to 9)                         | 0.4 (0.2 to 0.6)    | 82 (58 to 119)                         | 5 (3.6 to 7.2)           |
| Kyrgyzstan                       | Both   | 556 (517 to 602)  | 17.8 (16.5 to 19.2) | 4770 (4336 to 5219)  | 153.2 (139.2 to 168)   | 325 (303 to 352) | 10.6 (9.9 to 11.4)  | 9989 (9304 to 10801)      | 314.7 (293.2 to 338.9)  | 356 (254 to 482)                   | 11.4 (8 to 15.3)    | 10345 (9628 to 11201)                  | 326.1 (303.4 to 352.1)  | 651 (552 to 764)    | 12.5 (10.6 to 14.5)   | 5935 (5179 to 6823)    | 114.7 (100.5 to 130.9)   | 295 (254 to 342)   | 6.2 (5.4 to 7.2)    | 8922 (7597 to 10413)      | 166.8 (142.9 to 193.8)  | 436 (292 to 612)                   | 8.3 (5.7 to 11.7)   | 9358 (7981 to 10980)                   | 175.2 (150.8 to 204.5)   |
|                                  | Female | 555 (516 to 601)  | 31.7 (29.3 to 34.4) | 4760 (4327 to 5208)  | 270.5 (246.2 to 296.3) | 324 (303 to 351) | 18.3 (17.1 to 19.8) | 9972 (9287 to 10782)      | 571.2 (531.3 to 615.7)  | 355 (253 to 481)                   | 20.2 (14.4 to 27.3) | 10327 (9611 to 11181)                  | 591.4 (548.7 to 638.9)  | 644 (546 to 757)    | 22.4 (19.1 to 26.2)   | 5885 (5128 to 6772)    | 206.4 (180.8 to 236.3)   | 292 (251 to 338)   | 10.8 (9.4 to 12.5)  | 8826 (7501 to 10305)      | 302.4 (258.4 to 352.1)  | 431 (288 to 606)                   | 15 (10.1 to 21)     | 9257 (7887 to 10867)                   | 317.4 (272.2 to 371)     |
|                                  | Male   | 1 (1 to 1)        | 0.1 (0.1 to 0.1)    | 10 (8 to 12)         | 0.8 (0.6 to 0.9)       | 1 (0 to 1)       | 0 (0 to 0.1)        | 18 (15 to 20)             | 1.2 (1.1 to 1.4)        | 1 (1 to 1)                         | 0.1 (0 to 0.1)      | 18 (16 to 21)                          | 1.3 (1.1 to 1.5)        | 7 (5 to 8)          | 0.3 (0.2 to 0.4)      | 50 (39 to 63)          | 2.2 (1.8 to 2.8)         | 3 (3 to 4)         | 0.2 (0.1 to 0.2)    | 96 (76 to 120)            | 4.2 (3.3 to 5.2)        | 5 (3 to 7)                         | 0.2 (0.1 to 0.3)    | 101 (80 to 126)                        | 4.4 (3.5 to 5.5)         |
| Lao People's Democratic Republic | Both   | 324 (209 to 484)  | 13.5 (9.1 to 20)    | 2171 (1515 to 3001)  | 90.8 (65.3 to 123.4)   | 253 (167 to 381) | 11 (7.6 to 16.1)    | 8836 (5580 to 13197)      | 350.9 (227 to 524.4)    | 182 (103 to 286)                   | 7.5 (4.4 to 11.7)   | 9018 (5698 to 13495)                   | 358.4 (232.2 to 533.5)  | 859 (605 to 1227)   | 16.2 (11.6 to 22.8)   | 6451 (4770 to 8866)    | 120.1 (91.4 to 161.4)    | 535 (384 to 760)   | 10.9 (8 to 15.2)    | 18086 (12656 to 26172)    | 325.1 (231.4 to 465.1)  | 514 (317 to 803)                   | 9.5 (5.9 to 14.6)   | 18600 (13034 to 26869)                 | 334.6 (238.8 to 478.4)   |
|                                  | Female | 320 (207 to 480)  | 25.3 (16.9 to 37.6) | 2155 (1504 to 2983)  | 171.3 (122.4 to 234.6) | 250 (165 to 376) | 20.5 (14.1 to 30.1) | 8746 (5527 to 13063)      | 664.5 (428.5 to 999)    | 180 (101 to 283)                   | 14.1 (8.2 to 22.1)  | 8926 (5633 to 13325)                   | 678.6 (437.7 to 1016.2) | 851 (599 to 1216)   | 31.2 (22.4 to 44.3)   | 6402 (4735 to 8827)    | 233.4 (176.7 to 314.7)   | 528 (378 to 752)   | 20.8 (15.1 to 29.1) | 17896 (12509 to 25901)    | 631.7 (446.3 to 907.1)  | 509 (313 to 796)                   | 18.4 (11.4 to 28.4) | 18404 (12854 to 26638)                 | 650.1 (460.2 to 932.9)   |
|                                  | Male   | 4 (2 to 6)        | 0.4 (0.2 to 0.6)    | 17 (9 to 27)         | 1.5 (0.9 to 2.4)       | 3 (2 to 5)       | 0.3 (0.2 to 0.6)    | 89 (49 to 144)            | 8.3 (4.5 to 13.3)       | 2 (1 to 3)                         | 0.2 (0.1 to 0.3)    | 91 (50 to 147)                         | 8.5 (4.7 to 13.6)       | 9 (6 to 13)         | 0.4 (0.3 to 0.6)      | 49 (32 to 69)          | 2.1 (1.4 to 2.9)         | 7 (4 to 10)        | 0.4 (0.2 to 0.5)    | 190 (121 to 276)          | 8.1 (5.1 to 11.7)       | 5 (3 to 8)                         | 0.2 (0.1 to 0.4)    | 196 (124 to 283)                       | 8.3 (5.3 to 12)          |
| Latvia                           | Both   | 964 (901 to 1035) | 28.1 (26.3 to 30.2) | 9304 (8475 to 10249) | 268.7 (245.7 to 294.3) | 450 (427 to 474) | 12.9 (12.3 to 13.6) | 12643 (11976 to 13352)    | 373.4 (354 to 394.8)    | 655 (456 to 901)                   | 19 (13.2 to 26.1)   | 13297 (12595 to 14063)                 | 392.5 (371.2 to 415)    | 1098 (840 to 1428)  | 32.1 (24.4 to 42.3)   | 10668 (8704 to 13174)  | 307.1 (246.5 to 385.5)   | 422 (324 to 541)   | 11.2 (8.5 to 14.4)  | 9359 (7049 to 12206)      | 285.5 (213.4 to 378.3)  | 755 (501 to 1088)                  | 22 (14.2 to 31.9)   | 10114 (7692 to 13134)                  | 307.5 (229.2 to 406)     |
|                                  | Female | 961 (898 to 1031) | 47.9 (44.8 to 51.5) | 9283 (8455 to 10227) | 452.4 (414.6 to 493.1) | 448 (426 to 472) | 21.4 (20.3 to 22.5) | 12605 (11938 to 13314)    | 650.5 (615.7 to 689)    | 653 (454 to 898)                   | 32.3 (22.3 to 44.6) | 13258 (12557 to 14019)                 | 682.8 (645.7 to 723)    | 1091 (834 to 1422)  | 55.6 (41.8 to 73.8)   | 10616 (8651 to 13123)  | 529.5 (420.7 to 674.3)   | 419 (322 to 538)   | 18.5 (14 to 24.2)   | 9293 (6988 to 12138)      | 502.2 (371.9 to 669.3)  | 750 (496 to 1080)                  | 38.1 (24.4 to 55.6) | 10043 (7631 to 13039)                  | 540.3 (399.8 to 719.1)   |
|                                  | Male   | 3 (2 to 3)        | 0.2 (0.2 to 0.3)    | 21 (18 to 26)        | 1.6 (1.4 to 2)         | 2 (1 to 2)       | 0.1 (0.1 to 0.1)    | 38 (33 to 43)             | 2.9 (2.5 to 3.2)        | 2 (1 to 3)                         | 0.2 (0.1 to 0.2)    | 40 (35 to 45)                          | 3 (2.7 to 3.4)          | 7 (5 to 10)         | 0.5 (0.4 to 0.7)      | 52 (38 to 72)          | 3.9 (2.9 to 5.4)         | 3 (2 to 4)         | 0.2 (0.1 to 0.3)    | 66 (48 to 87)             | 5 (3.7 to 6.6)          | 5 (3 to 8)                         | 0.4 (0.3 to 0.6)    | 71 (52 to 94)                          | 5.4 (4 to 7.1)           |
| Lebanon                          | Both   | 623 (490 to 777)  | 25.3 (20.1 to 31.4) | 5291 (4329 to 6419)  | 215 (178.3 to 258.7)   | 320 (257 to 401) | 13.7 (11.2 to 17)   | 10293 (8122 to 12921)     | 408.5 (324.6 to 510.5)  | 398 (264 to 562)                   | 16.1 (10.8 to 22.5) | 10691 (8411 to 13398)                  | 424.6 (336.8 to 530.2)  | 3553 (2680 to 4666) | 67.4 (50.7 to 88.5)   | 31346 (24485 to 40121) | 595.1 (463.6 to 760.7)   | 1028 (794 to 1344) | 19.8 (15.2 to 25.8) | 28565 (21576 to 37191)    | 543.4 (410 to 711)      | 2354 (1526 to 3448)                | 44.6 (28.8 to 65.2) | 30918 (23510 to 40738)                 | 587.9 (446.3 to 774.7)   |
|                                  | Female | 613 (480 to 767)  | 48.4 (38.3 to 60.4) | 5225 (4267 to 6354)  | 414.1 (342.8 to 500.1) | 313 (250 to 392) | 26 (21 to 32.3)     | 10122 (7928 to 12750)     | 783.4 (617.9 to 983.4)  | 391 (259 to 554)                   | 30.8 (20.5 to 43.4) | 10513 (8225 to 13210)                  | 814.3 (642.1 to 1023.2) | 3519 (2655 to 4617) | 122.5 (92.1 to 160.7) | 31097 (24277 to 39754) | 1083.5 (844.5 to 1383.5) | 1012 (777 to 1320) | 35.5 (27.2 to 46.4) | 28245 (21306 to 36799)    | 985.9 (742.5 to 1290.1) | 2330 (1513 to 3414)                | 81 (52.4 to 118.5)  | 30575 (23260 to 40346)                 | 1067 (808.6 to 1407.3)   |
|                                  | Male   | 10 (7 to 14)      | 1 (0.7 to 1.4)      | 67 (47 to 92)        | 6 (4.4 to 8.2)         | 7 (5 to 11)      | 0.8 (0.5 to 1.2)    | 171 (115 to 246)          | 15.4 (10.4 to 21.6)     | 7 (4 to 10)                        | 0.6 (0.4 to 0.9)    | 178 (120 to 254)                       | 16.1 (10.9 to 22.3)     | 34 (23 to 51)       | 1.5 (1 to 2.2)        | 249 (174 to 353)       | 10.5 (7.4 to 14.9)       | 16 (11 to 24)      | 0.7 (0.5 to 1.1)    | 320 (217 to 459)          | 13.6 (9.3 to 19.5)      | 24 (14 to 38)                      | 1 (0.6 to 1.6)      | 343 (233 to 495)                       | 14.6 (10 to 21)          |

|            |        | 1990                |                     |                        |                         |                  |                     |                           |                        |                                    |                     |                                        |                         | 2019                |                     |                        |                         |                    |                     |                           |                         |                                    |                     |                                        |                        |
|------------|--------|---------------------|---------------------|------------------------|-------------------------|------------------|---------------------|---------------------------|------------------------|------------------------------------|---------------------|----------------------------------------|-------------------------|---------------------|---------------------|------------------------|-------------------------|--------------------|---------------------|---------------------------|-------------------------|------------------------------------|---------------------|----------------------------------------|------------------------|
|            |        | Incidence           |                     | Prevalence             |                         | Deaths           |                     | YLLs (Years of Life Lost) |                        | YLDs (Years Lived with Disability) |                     | DALYs (Disability-Adjusted Life Years) |                         | Incidence           |                     | Prevalence             |                         | Deaths             |                     | YLLs (Years of Life Lost) |                         | YLDs (Years Lived with Disability) |                     | DALYs (Disability-Adjusted Life Years) |                        |
| Location   | Sex    | Number              | Rate                | Number                 | Rate                    | Number           | Rate                | Number                    | Rate                   | Number                             | Rate                | Number                                 | Rate                    | Number              | Rate                | Number                 | Rate                    | Number             | Rate                | Number                    | Rate                    | Number                             | Rate                | Number                                 | Rate                   |
| Lesotho    | Both   | 96 (72 to 128)      | 9.6 (7.4 to 12.7)   | 671 (531 to 864)       | 66.1 (52.9 to 83.2)     | 76 (59 to 101)   | 8.2 (6.3 to 10.8)   | 2169 (1588 to 2968)       | 204.6 (152.2 to 276.3) | 54 (35 to 83)                      | 5.3 (3.5 to 7.9)    | 2224 (1636 to 3044)                    | 209.9 (157.2 to 282.9)  | 294 (182 to 445)    | 22.2 (14.2 to 33.1) | 1845 (1203 to 2729)    | 132.4 (90.3 to 192.1)   | 214 (136 to 320)   | 17.7 (11.6 to 25.6) | 6346 (3831 to 9770)       | 444.6 (277.4 to 670.9)  | 161 (90 to 259)                    | 11.7 (6.8 to 18.4)  | 6506 (3913 to 10029)                   | 456.2 (283.9 to 690.3) |
|            | Female | 91 (68 to 123)      | 16.2 (12.2 to 21.6) | 648 (507 to 837)       | 114 (89.8 to 145.4)     | 73 (55 to 97)    | 13.3 (10.2 to 17.6) | 2070 (1508 to 2859)       | 357.7 (262.1 to 489.2) | 52 (33 to 80)                      | 9.1 (5.9 to 13.8)   | 2121 (1544 to 2932)                    | 366.7 (268.9 to 499.8)  | 286 (177 to 436)    | 37 (23.3 to 55.8)   | 1805 (1167 to 2677)    | 226.3 (150 to 330.7)    | 208 (131 to 312)   | 28.4 (18.1 to 41.8) | 6170 (3703 to 9529)       | 764.3 (464.6 to 1167.5) | 156 (87 to 253)                    | 19.7 (11.3 to 31.5) | 6326 (3794 to 9789)                    | 784 (477.7 to 1202.3)  |
|            | Male   | 4 (3 to 6)          | 1 (0.7 to 1.5)      | 24 (16 to 33)          | 5.4 (3.9 to 7.4)        | 4 (2 to 5)       | 1 (0.6 to 1.4)      | 100 (64 to 148)           | 21.7 (14.2 to 32)      | 3 (2 to 4)                         | 0.6 (0.4 to 0.9)    | 102 (65 to 152)                        | 22.3 (14.5 to 32.8)     | 7 (4 to 11)         | 1.4 (0.8 to 2.1)    | 40 (25 to 61)          | 7 (4.6 to 10.2)         | 6 (3 to 9)         | 1.2 (0.8 to 1.8)    | 176 (99 to 277)           | 29.4 (17.4 to 45.5)     | 4 (2 to 7)                         | 0.8 (0.4 to 1.3)    | 180 (101 to 285)                       | 30.3 (17.8 to 46.5)    |
| Liberia    | Both   | 99 (79 to 124)      | 8.6 (6.8 to 10.6)   | 647 (534 to 782)       | 55.1 (45.7 to 66.5)     | 80 (64 to 99)    | 7.2 (5.8 to 8.8)    | 2473 (1943 to 3110)       | 203.9 (160.7 to 255)   | 54 (36 to 76)                      | 4.6 (3.1 to 6.4)    | 2528 (1987 to 3179)                    | 208.5 (164.6 to 261)    | 312 (210 to 473)    | 12.4 (8.6 to 18.7)  | 2145 (1517 to 3134)    | 82.5 (60.2 to 117.6)    | 208 (142 to 315)   | 9.2 (6.5 to 13.7)   | 6868 (4569 to 10455)      | 249.4 (168.2 to 379)    | 179 (104 to 293)                   | 6.9 (4.1 to 11)     | 7047 (4696 to 10723)                   | 256.3 (173.1 to 388.1) |
|            | Female | 99 (78 to 123)      | 18 (14.4 to 22.3)   | 642 (529 to 778)       | 116.5 (96.2 to 140.4)   | 79 (63 to 98)    | 15.1 (12.2 to 18.5) | 2453 (1924 to 3087)       | 428.1 (337.5 to 535.7) | 54 (36 to 76)                      | 9.7 (6.5 to 13.5)   | 2506 (1968 to 3159)                    | 437.8 (346.4 to 547.2)  | 310 (209 to 471)    | 25.5 (17.5 to 38.6) | 2134 (1507 to 3120)    | 169.9 (123.7 to 243.9)  | 207 (141 to 313)   | 18.8 (13.2 to 28)   | 6825 (4540 to 10407)      | 514.1 (346.7 to 783.6)  | 178 (104 to 291)                   | 14.1 (8.4 to 22.6)  | 7003 (4650 to 10662)                   | 528.2 (356.6 to 804.2) |
|            | Male   | 1 (1 to 1)          | 0.1 (0.1 to 0.2)    | 5 (3 to 6)             | 0.7 (0.5 to 1)          | 1 (1 to 1)       | 0.1 (0.1 to 0.2)    | 21 (14 to 30)             | 3.3 (2.3 to 4.7)       | 1 (0 to 1)                         | 0.1 (0.1 to 0.1)    | 21 (15 to 30)                          | 3.4 (2.4 to 4.8)        | 2 (1 to 3)          | 0.2 (0.1 to 0.3)    | 11 (7 to 17)           | 0.9 (0.6 to 1.4)        | 2 (1 to 2)         | 0.2 (0.1 to 0.2)    | 43 (26 to 66)             | 3.5 (2.2 to 5.3)        | 1 (1 to 2)                         | 0.1 (0.1 to 0.2)    | 44 (27 to 68)                          | 3.6 (2.2 to 5.5)       |
| Libya      | Both   | 216 (169 to 284)    | 9.8 (7.6 to 13)     | 1930 (1594 to 2412)    | 90 (74.3 to 110.4)      | 116 (91 to 152)  | 5.6 (4.4 to 7.4)    | 3815 (2997 to 4997)       | 168.1 (132 to 221.2)   | 142 (91 to 206)                    | 6.5 (4.2 to 9.5)    | 3956 (3105 to 5213)                    | 174.6 (136.8 to 230.4)  | 1365 (961 to 1906)  | 20.5 (14.6 to 28)   | 11646 (8531 to 15855)  | 176.2 (133.1 to 232.5)  | 517 (375 to 707)   | 8.6 (6.3 to 11.5)   | 17599 (12510 to 24361)    | 259.1 (186.9 to 352.6)  | 889 (548 to 1371)                  | 13.3 (8.2 to 20)    | 18488 (13162 to 25563)                 | 272.4 (195.9 to 371.8) |
|            | Female | 209 (164 to 278)    | 21 (16.4 to 27.8)   | 1886 (1551 to 2367)    | 193.6 (159.5 to 240.8)  | 111 (87 to 148)  | 11.7 (9.1 to 15.6)  | 3692 (2893 to 4873)       | 363.5 (283.8 to 481.5) | 137 (88 to 201)                    | 13.8 (8.9 to 20.3)  | 3830 (3004 to 5070)                    | 377.4 (295.1 to 500.4)  | 1347 (944 to 1886)  | 41.4 (29.3 to 56.8) | 11506 (8401 to 15649)  | 357.4 (268.1 to 472.2)  | 507 (364 to 693)   | 17.2 (12.5 to 23.2) | 17315 (12243 to 24031)    | 523.6 (375.2 to 716.4)  | 875 (538 to 1355)                  | 26.9 (16.6 to 40.6) | 18190 (12936 to 25290)                 | 550.5 (393.6 to 753.1) |
|            | Male   | 7 (4 to 10)         | 0.7 (0.4 to 1)      | 45 (31 to 63)          | 4.3 (3 to 6)            | 5 (3 to 7)       | 0.5 (0.3 to 0.8)    | 122 (79 to 178)           | 11.3 (7.2 to 16.4)     | 4 (2 to 7)                         | 0.4 (0.2 to 0.7)    | 127 (82 to 184)                        | 11.7 (7.5 to 17)        | 19 (11 to 30)       | 0.7 (0.4 to 1.1)    | 140 (88 to 213)        | 5 (3.2 to 7.5)          | 11 (6 to 16)       | 0.4 (0.3 to 0.6)    | 284 (165 to 446)          | 9.7 (5.6 to 15)         | 13 (7 to 22)                       | 0.5 (0.3 to 0.8)    | 298 (173 to 466)                       | 10.1 (5.9 to 15.8)     |
| Lithuania  | Both   | 1198 (1117 to 1286) | 27.7 (25.9 to 29.7) | 11873 (10866 to 13099) | 272.3 (249.5 to 299.5)  | 500 (474 to 526) | 11.4 (10.8 to 12)   | 14418 (13664 to 15207)    | 334.5 (317.4 to 352.2) | 827 (575 to 1129)                  | 19.1 (13.3 to 26)   | 15245 (14400 to 16100)                 | 353.6 (334.3 to 373.1)  | 1367 (1101 to 1679) | 28.7 (23.1 to 35.5) | 13919 (11814 to 16277) | 285.3 (238.8 to 338.4)  | 537 (437 to 655)   | 10 (8 to 12.2)      | 12259 (9801 to 15194)     | 261.2 (207.2 to 326.1)  | 956 (658 to 1349)                  | 20 (13.6 to 28.8)   | 13215 (10628 to 16387)                 | 281.2 (223.7 to 351.1) |
|            | Female | 1193 (1112 to 1281) | 48.6 (45.3 to 52.2) | 11834 (10826 to 13056) | 471.5 (432.6 to 517.3)  | 497 (472 to 523) | 19.3 (18.3 to 20.3) | 14359 (13599 to 15149)    | 590.7 (559.9 to 622.5) | 823 (573 to 1124)                  | 33.3 (23.2 to 45.7) | 15182 (14342 to 16040)                 | 624 (588.1 to 659.2)    | 1359 (1094 to 1670) | 50.5 (40.2 to 62.8) | 13856 (11761 to 16201) | 498.5 (414.2 to 595.8)  | 534 (434 to 652)   | 16.7 (13.4 to 20.5) | 12182 (9733 to 15092)     | 462.6 (365.4 to 579.5)  | 950 (652 to 1342)                  | 35.1 (23.9 to 50.7) | 13132 (10549 to 16270)                 | 497.7 (394.4 to 622.1) |
|            | Male   | 5 (4 to 6)          | 0.3 (0.2 to 0.3)    | 38 (32 to 45)          | 2.2 (1.8 to 2.5)        | 2 (2 to 3)       | 0.1 (0.1 to 0.2)    | 60 (52 to 68)             | 3.4 (3 to 3.8)         | 4 (3 to 5)                         | 0.2 (0.1 to 0.3)    | 64 (55 to 72)                          | 3.6 (3.1 to 4.1)        | 8 (6 to 11)         | 0.4 (0.3 to 0.5)    | 63 (46 to 82)          | 3.1 (2.3 to 4)          | 4 (3 to 5)         | 0.2 (0.1 to 0.2)    | 77 (56 to 100)            | 3.8 (2.8 to 4.9)        | 6 (4 to 9)                         | 0.3 (0.2 to 0.5)    | 83 (61 to 108)                         | 4.1 (3 to 5.3)         |
| Luxembourg | Both   | 255 (233 to 277)    | 49.4 (45.4 to 53.9) | 2662 (2391 to 2988)    | 511.3 (461.3 to 569.7)  | 100 (93 to 107)  | 19 (17.6 to 20.3)   | 2388 (2221 to 2544)       | 468.5 (434.9 to 498.9) | 189 (134 to 260)                   | 36.5 (25.9 to 50.6) | 2577 (2396 to 2750)                    | 505 (468.5 to 539.5)    | 382 (308 to 474)    | 40.9 (33 to 50.7)   | 4276 (3663 to 4978)    | 453.4 (387.5 to 529.6)  | 106 (90 to 124)    | 10.4 (8.9 to 12.2)  | 2214 (1912 to 2562)       | 237.5 (205.4 to 274.6)  | 293 (197 to 416)                   | 31.4 (21 to 44.7)   | 2507 (2157 to 2912)                    | 268.9 (230.9 to 312.4) |
|            | Female | 253 (232 to 275)    | 90.5 (82.8 to 99)   | 2648 (2379 to 2972)    | 927.9 (837.1 to 1032.2) | 99 (92 to 106)   | 32.9 (30.5 to 35.1) | 2373 (2205 to 2529)       | 869.2 (804.5 to 926.4) | 188 (133 to 258)                   | 66.6 (47.2 to 93.4) | 2560 (2378 to 2733)                    | 935.8 (867.2 to 1000.3) | 378 (305 to 471)    | 79.7 (64 to 98.7)   | 4244 (3635 to 4942)    | 879.3 (749.1 to 1030.5) | 105 (89 to 123)    | 19.2 (16.4 to 22.4) | 2195 (1895 to 2541)       | 462.6 (400.2 to 534.5)  | 290 (195 to 411)                   | 61.1 (40.8 to 86.7) | 2485 (2138 to 2888)                    | 523.6 (449.9 to 608.5) |
|            | Male   | 2 (1 to 2)          | 0.7 (0.6 to 0.8)    | 14 (12 to 17)          | 6.3 (5.4 to 7.4)        | 1 (1 to 1)       | 0.3 (0.3 to 0.4)    | 16 (14 to 18)             | 7 (6.3 to 7.7)         | 1 (1 to 2)                         | 0.6 (0.4 to 0.8)    | 17 (15 to 19)                          | 7.5 (6.7 to 8.4)        | 3 (2 to 4)          | 0.7 (0.5 to 0.9)    | 32 (26 to 40)          | 7.2 (5.8 to 9)          | 1 (1 to 1)         | 0.2 (0.2 to 0.3)    | 20 (17 to 23)             | 4.4 (3.7 to 5.2)        | 3 (2 to 4)                         | 0.6 (0.4 to 0.9)    | 22 (19 to 27)                          | 5 (4.2 to 6)           |
| Madagascar | Both   | 568 (466 to 690)    | 9.7 (8 to 11.5)     | 3729 (3136 to 4431)    | 62.4 (52.9 to 73)       | 446 (368 to 535) | 8.2 (6.7 to 9.6)    | 15072 (12162 to 18528)    | 238.3 (196.2 to 288.3) | 321 (217 to 450)                   | 5.4 (3.7 to 7.4)    | 15394 (12394 to 18892)                 | 243.7 (200.6 to 293.5)  | 1629 (1145 to 2213) | 12.1 (8.9 to 16.2)  | 11191 (8269 to 14873)  | 79.8 (60.8 to 103.7)    | 1145 (821 to 1544) | 9.6 (7.1 to 12.5)   | 39337 (27651 to 53513)    | 262.9 (188.8 to 354)    | 948 (603 to 1400)                  | 6.8 (4.4 to 9.9)    | 40285 (28384 to 54797)                 | 269.7 (194.3 to 362.8) |
|            | Female | 519 (421 to 643)    | 17.3 (14.2 to 20.9) | 3497 (2906 to 4219)    | 115.5 (97 to 136.6)     | 399 (327 to 487) | 14.2 (11.6 to 16.9) | 14028 (11260 to 17604)    | 433.4 (351.2 to 533.7) | 295 (197 to 416)                   | 9.6 (6.5 to 13.4)   | 14323 (11499 to 17947)                 | 443 (358.1 to 546.2)    | 1551 (1081 to 2124) | 21.9 (15.7 to 29.8) | 10774 (7928 to 14411)  | 147.5 (111.7 to 192.7)  | 1076 (761 to 1465) | 16.8 (12.3 to 22.4) | 37645 (26170 to 51508)    | 483.1 (341.6 to 657.5)  | 903 (564 to 1332)                  | 12.3 (8 to 18)      | 38548 (26820 to 52740)                 | 495.4 (350.1 to 674.1) |

|                  |        | 1990                |                     |                        |                        |                     |                     |                           |                        |                                    |                     |                                        |                         | 2019                 |                     |                        |                        |                     |                     |                           |                        |                                    |                     |                                        |                        |
|------------------|--------|---------------------|---------------------|------------------------|------------------------|---------------------|---------------------|---------------------------|------------------------|------------------------------------|---------------------|----------------------------------------|-------------------------|----------------------|---------------------|------------------------|------------------------|---------------------|---------------------|---------------------------|------------------------|------------------------------------|---------------------|----------------------------------------|------------------------|
|                  |        | Incidence           |                     | Prevalence             |                        | Deaths              |                     | YLLs (Years of Life Lost) |                        | YLDs (Years Lived with Disability) |                     | DALYs (Disability-Adjusted Life Years) |                         | Incidence            |                     | Prevalence             |                        | Deaths              |                     | YLLs (Years of Life Lost) |                        | YLDs (Years Lived with Disability) |                     | DALYs (Disability-Adjusted Life Years) |                        |
| Location         | Sex    | Number              | Rate                | Number                 | Rate                   | Number              | Rate                | Number                    | Rate                   | Number                             | Rate                | Number                                 | Rate                    | Number               | Rate                | Number                 | Rate                   | Number              | Rate                | Number                    | Rate                   | Number                             | Rate                | Number                                 | Rate                   |
|                  | Male   | 49 (29 to 74)       | 2.1 (1.3 to 3.3)    | 233 (155 to 335)       | 9.5 (6.4 to 13.5)      | 47 (28 to 72)       | 2.2 (1.3 to 3.4)    | 1045 (648 to 1573)        | 41.4 (24.9 to 62.6)    | 26 (14 to 45)                      | 1.1 (0.6 to 1.8)    | 1071 (666 to 1615)                     | 42.5 (25.6 to 64.4)     | 78 (43 to 131)       | 1.8 (1 to 3)        | 416 (258 to 677)       | 8.7 (5.5 to 13.5)      | 68 (38 to 114)      | 1.8 (1 to 2.9)      | 1693 (942 to 2861)        | 33.3 (18.7 to 55.4)    | 44 (23 to 82)                      | 1 (0.5 to 1.7)      | 1737 (973 to 2948)                     | 34.2 (19.2 to 56.8)    |
| Malawi           | Both   | 421 (325 to 516)    | 9.8 (7.8 to 12)     | 2718 (2195 to 3263)    | 61.3 (50.3 to 73)      | 331 (259 to 406)    | 8.3 (6.6 to 10.1)   | 10725 (8363 to 13340)     | 228.3 (178 to 281)     | 236 (156 to 323)                   | 5.3 (3.6 to 7.1)    | 10961 (8530 to 13646)                  | 233.6 (182.6 to 287.6)  | 1061 (784 to 1370)   | 13.5 (10.3 to 17.1) | 6955 (5219 to 8831)    | 83.2 (64.8 to 103.4)   | 774 (584 to 983)    | 11 (8.5 to 13.6)    | 22981 (16551 to 30374)    | 265 (196.5 to 341.1)   | 597 (368 to 867)                   | 7.2 (4.7 to 10.4)   | 23578 (16926 to 31098)                 | 272.3 (201.5 to 350)   |
|                  | Female | 378 (289 to 471)    | 16.1 (12.4 to 19.9) | 2516 (2025 to 3041)    | 105.8 (85.9 to 126.9)  | 291 (225 to 362)    | 13.3 (10.3 to 16.2) | 9793 (7536 to 12324)      | 388.7 (298.1 to 485.2) | 213 (141 to 293)                   | 8.9 (5.9 to 12.2)   | 10007 (7708 to 12606)                  | 397.6 (306.9 to 499)    | 985 (716 to 1290)    | 22.2 (16.5 to 28.4) | 6557 (4852 to 8442)    | 141.7 (108 to 178.4)   | 709 (530 to 907)    | 17.2 (13.2 to 21.7) | 21416 (15163 to 28444)    | 448 (324.8 to 586.6)   | 555 (337 to 809)                   | 12 (7.5 to 17.4)    | 21971 (15490 to 29301)                 | 460 (333.4 to 601.9)   |
|                  | Male   | 43 (29 to 62)       | 2.9 (1.8 to 4.1)    | 202 (144 to 283)       | 12.2 (8.7 to 16.8)     | 40 (26 to 58)       | 2.9 (1.8 to 4.1)    | 932 (622 to 1341)         | 54.2 (35.8 to 78.4)    | 23 (12 to 36)                      | 1.4 (0.8 to 2.2)    | 954 (638 to 1372)                      | 55.6 (36.8 to 80.5)     | 76 (48 to 111)       | 2.9 (1.8 to 4.1)    | 397 (263 to 565)       | 13.4 (9.3 to 18.6)     | 65 (42 to 95)       | 2.7 (1.7 to 4)      | 1565 (979 to 2307)        | 50.7 (32.8 to 73.7)    | 42 (23 to 70)                      | 1.5 (0.8 to 2.3)    | 1607 (1007 to 2375)                    | 52.2 (33.8 to 75.3)    |
| Malaysia         | Both   | 1920 (1709 to 2185) | 17.3 (15.3 to 19.7) | 15277 (13515 to 17336) | 137.3 (121.2 to 155.5) | 1140 (1014 to 1295) | 11.2 (9.9 to 12.8)  | 37703 (33582 to 42864)    | 328.3 (291.3 to 373)   | 1178 (815 to 1609)                 | 10.5 (7.3 to 14.4)  | 38881 (34540 to 44164)                 | 338.7 (300.6 to 385)    | 8663 (6567 to 10970) | 29.4 (22.4 to 37.2) | 74153 (58424 to 91858) | 249.3 (198.2 to 306.2) | 3530 (2724 to 4462) | 12.9 (10 to 16.2)   | 105906 (81203 to 135308)  | 355.5 (273.4 to 452.9) | 5625 (3634 to 8024)                | 18.9 (12.4 to 26.9) | 111532 (85615 to 140610)               | 374.4 (287.8 to 470.4) |
|                  | Female | 1912 (1700 to 2176) | 34.1 (30.3 to 38.9) | 15230 (13476 to 17294) | 270.9 (239.2 to 306.4) | 1134 (1008 to 1290) | 21.9 (19.4 to 25.1) | 37548 (33439 to 42712)    | 648.7 (575.2 to 738.3) | 1173 (811 to 1602)                 | 20.6 (14.4 to 28.4) | 38721 (34385 to 44008)                 | 669.3 (594.9 to 760.3)  | 8630 (6541 to 10934) | 59.5 (45.2 to 75.1) | 73940 (58241 to 91588) | 504.6 (400.8 to 620.7) | 3511 (2709 to 4443) | 25.8 (19.8 to 32.5) | 105465 (80735 to 134740)  | 719 (552.4 to 915.9)   | 5602 (3617 to 7993)                | 38.2 (25.1 to 54.4) | 111068 (85201 to 139953)               | 757.2 (581.1 to 952.1) |
|                  | Male   | 8 (6 to 11)         | 0.2 (0.1 to 0.3)    | 47 (36 to 61)          | 1 (0.7 to 1.3)         | 6 (5 to 8)          | 0.2 (0.1 to 0.2)    | 155 (119 to 200)          | 3.2 (2.4 to 4.3)       | 5 (3 to 8)                         | 0.1 (0.1 to 0.2)    | 160 (122 to 207)                       | 3.4 (2.5 to 4.4)        | 33 (22 to 47)        | 0.3 (0.2 to 0.4)    | 213 (142 to 303)       | 1.5 (1 to 2.2)         | 19 (13 to 27)       | 0.2 (0.1 to 0.2)    | 441 (307 to 609)          | 3.3 (2.3 to 4.5)       | 23 (14 to 36)                      | 0.2 (0.1 to 0.3)    | 464 (322 to 638)                       | 3.4 (2.4 to 4.7)       |
| Maldives         | Both   | 14 (8 to 20)        | 11.9 (7.2 to 17.6)  | 105 (66 to 147)        | 90.9 (59.8 to 124.7)   | 8 (5 to 12)         | 8 (5 to 11.4)       | 301 (171 to 446)          | 253.3 (148.8 to 371.8) | 8 (4 to 13)                        | 7.1 (3.7 to 11.4)   | 310 (176 to 456)                       | 260.4 (152.8 to 381.3)  | 56 (44 to 68)        | 14.7 (11.7 to 17.8) | 494 (405 to 595)       | 129.6 (107.3 to 153.5) | 20 (16 to 24)       | 6.2 (5 to 7.5)      | 588 (470 to 723)          | 152.8 (122.6 to 187.9) | 37 (25 to 53)                      | 9.6 (6.4 to 13.6)   | 625 (498 to 766)                       | 162.4 (130.9 to 198.4) |
|                  | Female | 14 (8 to 20)        | 27.2 (16.6 to 40)   | 104 (65 to 147)        | 208 (139.4 to 281.9)   | 8 (5 to 12)         | 18.7 (12 to 26.7)   | 299 (170 to 444)          | 568.8 (337.8 to 837)   | 8 (4 to 13)                        | 16.2 (8.5 to 25.7)  | 308 (174 to 454)                       | 585 (347.1 to 861.4)    | 55 (44 to 68)        | 33.8 (26.9 to 40.9) | 491 (402 to 592)       | 298.1 (247 to 355)     | 20 (16 to 24)       | 13.6 (11.1 to 16.5) | 584 (466 to 718)          | 351.3 (282 to 430)     | 37 (24 to 52)                      | 22.1 (14.8 to 31.3) | 621 (494 to 761)                       | 373.4 (299.7 to 455.8) |
|                  | Male   | 0 (0 to 0)          | 0.2 (0.1 to 0.3)    | 1 (0 to 1)             | 0.9 (0.5 to 1.3)       | 0 (0 to 0)          | 0.1 (0.1 to 0.2)    | 2 (1 to 3)                | 3.3 (2 to 5.1)         | 0 (0 to 0)                         | 0.1 (0.1 to 0.2)    | 2 (1 to 3)                             | 3.4 (2.1 to 5.3)        | 0 (0 to 0)           | 0.2 (0.1 to 0.3)    | 3 (2 to 3)             | 1.3 (0.9 to 1.7)       | 0 (0 to 0)          | 0.1 (0.1 to 0.1)    | 4 (3 to 6)                | 2.2 (1.6 to 2.9)       | 0 (0 to 0)                         | 0.1 (0.1 to 0.2)    | 5 (4 to 6)                             | 2.3 (1.7 to 3)         |
| Mali             | Both   | 425 (346 to 513)    | 9.1 (7.4 to 11)     | 2774 (2328 to 3260)    | 59.6 (50.2 to 70)      | 336 (274 to 405)    | 7.5 (6.1 to 9)      | 11238 (9138 to 13553)     | 226.8 (184.2 to 274.5) | 236 (159 to 325)                   | 5 (3.4 to 6.8)      | 11474 (9388 to 13830)                  | 231.8 (188.9 to 281)    | 1131 (824 to 1497)   | 11.3 (8.4 to 14.8)  | 7920 (6004 to 10221)   | 78.9 (61.6 to 99.9)    | 777 (581 to 1014)   | 8.2 (6.3 to 10.7)   | 25363 (18198 to 33473)    | 240.4 (177 to 315.3)   | 653 (412 to 964)                   | 6.4 (4.1 to 9.5)    | 26016 (18723 to 34415)                 | 246.8 (181.4 to 323.1) |
|                  | Female | 424 (345 to 512)    | 17.8 (14.5 to 21.6) | 2765 (2321 to 3249)    | 117.1 (98.6 to 137.5)  | 335 (273 to 404)    | 14.7 (11.9 to 17.7) | 11202 (9108 to 13514)     | 446.5 (362.4 to 541.2) | 235 (158 to 322)                   | 9.8 (6.6 to 13.4)   | 11437 (9356 to 13790)                  | 456.3 (371 to 554.5)    | 1126 (820 to 1491)   | 23.2 (17.3 to 30.3) | 7892 (5984 to 10192)   | 161.5 (126.2 to 204.5) | 774 (578 to 1010)   | 16.9 (12.9 to 22)   | 25257 (18128 to 33323)    | 490.2 (361.2 to 642.8) | 650 (410 to 961)                   | 13.2 (8.4 to 19.5)  | 25907 (18646 to 34260)                 | 503.3 (370.7 to 657.5) |
|                  | Male   | 1 (1 to 2)          | 0.1 (0 to 0.1)      | 8 (6 to 12)            | 0.3 (0.2 to 0.5)       | 1 (1 to 2)          | 0.1 (0 to 0.1)      | 36 (25 to 50)             | 1.5 (1 to 2.1)         | 1 (1 to 1)                         | 0 (0 to 0.1)        | 37 (26 to 51)                          | 1.5 (1 to 2.1)          | 5 (3 to 7)           | 0.1 (0.1 to 0.1)    | 28 (19 to 40)          | 0.5 (0.3 to 0.7)       | 4 (2 to 5)          | 0.1 (0.1 to 0.1)    | 107 (72 to 159)           | 1.9 (1.3 to 3)         | 3 (2 to 5)                         | 0.1 (0 to 0.1)      | 109 (74 to 163)                        | 2 (1.3 to 3.1)         |
| Malta            | Both   | 193 (176 to 212)    | 45.4 (41.4 to 49.7) | 1953 (1764 to 2173)    | 458.8 (414.8 to 510.5) | 80 (74 to 86)       | 19.1 (17.7 to 20.5) | 2065 (1916 to 2220)       | 485.1 (449.8 to 520.5) | 141 (98 to 194)                    | 33 (22.9 to 45.4)   | 2206 (2049 to 2365)                    | 518.1 (481.1 to 555.3)  | 318 (262 to 384)     | 41.6 (34.3 to 50.4) | 3512 (3060 to 4049)    | 445 (383.7 to 514.5)   | 96 (82 to 111)      | 11.1 (9.6 to 12.8)  | 2031 (1753 to 2342)       | 271.6 (237.5 to 311.3) | 242 (165 to 343)                   | 31.4 (21.2 to 44.9) | 2273 (1962 to 2644)                    | 303 (263.6 to 350.4)   |
|                  | Female | 192 (175 to 211)    | 83.2 (75.8 to 91.2) | 1941 (1753 to 2159)    | 837.6 (756.8 to 926.1) | 79 (74 to 85)       | 34.1 (31.6 to 36.4) | 2053 (1905 to 2208)       | 895.7 (831.5 to 963.1) | 140 (97 to 193)                    | 60.5 (42 to 83.2)   | 2193 (2036 to 2351)                    | 956.2 (886.4 to 1025.7) | 316 (260 to 381)     | 80.5 (66.3 to 97.5) | 3486 (3036 to 4024)    | 858.3 (738.2 to 994.9) | 95 (81 to 111)      | 20.6 (17.7 to 23.8) | 2015 (1739 to 2326)       | 528.6 (461.7 to 604.8) | 240 (164 to 340)                   | 60.7 (40.8 to 87.1) | 2255 (1945 to 2628)                    | 589.3 (511.4 to 679.9) |
|                  | Male   | 1 (1 to 1)          | 0.6 (0.5 to 0.8)    | 11 (9 to 13)           | 6 (5 to 7.1)           | 1 (0 to 1)          | 0.3 (0.3 to 0.4)    | 12 (10 to 14)             | 6.4 (5.5 to 7.4)       | 1 (1 to 1)                         | 0.5 (0.3 to 0.7)    | 13 (11 to 15)                          | 6.9 (5.9 to 8)          | 2 (2 to 3)           | 0.6 (0.5 to 0.8)    | 26 (20 to 33)          | 6.4 (5.2 to 7.9)       | 1 (1 to 1)          | 0.2 (0.2 to 0.2)    | 16 (12 to 19)             | 4 (3.3 to 4.9)         | 2 (1 to 3)                         | 0.5 (0.3 to 0.8)    | 18 (14 to 22)                          | 4.6 (3.7 to 5.6)       |
| Marshall Islands | Both   | 3 (3 to 4)          | 16.1 (13.1 to 19.6) | 25 (21 to 30)          | 129.6 (110.2 to 151.5) | 2 (2 to 3)          | 12.5 (10.2 to 15.2) | 76 (63 to 93)             | 357.3 (294.1 to 435.1) | 2 (1 to 3)                         | 9.6 (6.6 to 13.3)   | 78 (64 to 95)                          | 367 (302.3 to 446.9)    | 12 (8 to 19)         | 28.6 (18.9 to 42.5) | 93 (64 to 135)         | 208.8 (149 to 294.3)   | 7 (5 to 11)         | 19.4 (13.3 to 28.2) | 266 (169 to 402)          | 574.7 (376.7 to 859.6) | 7 (4 to 12)                        | 16.6 (10 to 26)     | 274 (175 to 413)                       | 591.3 (389.4 to 883.7) |

|                                  |        | 1990                |                       |                        |                          |                     |                     |                           |                        |                                    |                     |                                        |                         | 2019                   |                        |                           |                         |                     |                     |                           |                          |                                    |                     |                                        |                          |
|----------------------------------|--------|---------------------|-----------------------|------------------------|--------------------------|---------------------|---------------------|---------------------------|------------------------|------------------------------------|---------------------|----------------------------------------|-------------------------|------------------------|------------------------|---------------------------|-------------------------|---------------------|---------------------|---------------------------|--------------------------|------------------------------------|---------------------|----------------------------------------|--------------------------|
|                                  |        | Incidence           |                       | Prevalence             |                          | Deaths              |                     | YLLs (Years of Life Lost) |                        | YLDs (Years Lived with Disability) |                     | DALYs (Disability-Adjusted Life Years) |                         | Incidence              |                        | Prevalence                |                         | Deaths              |                     | YLLs (Years of Life Lost) |                          | YLDs (Years Lived with Disability) |                     | DALYs (Disability-Adjusted Life Years) |                          |
| Location                         | Sex    | Number              | Rate                  | Number                 | Rate                     | Number              | Rate                | Number                    | Rate                   | Number                             | Rate                | Number                                 | Rate                    | Number                 | Rate                   | Number                    | Rate                    | Number              | Rate                | Number                    | Rate                     | Number                             | Rate                | Number                                 | Rate                     |
|                                  | Female | 3 (3 to 4)          | 31.9 (26 to 38.9)     | 25 (21 to 30)          | 257.5 (218.1 to 302.2)   | 2 (2 to 3)          | 24 (19.6 to 29.3)   | 76 (62 to 93)             | 722.8 (592.3 to 884.5) | 2 (1 to 3)                         | 19.2 (13.1 to 26.6) | 78 (63 to 95)                          | 741.9 (606.3 to 905.5)  | 12 (8 to 19)           | 58.3 (38.7 to 86.8)    | 93 (63 to 134)            | 426 (304.4 to 600)      | 7 (5 to 11)         | 39.6 (27.1 to 57.8) | 265 (168 to 400)          | 1169.1 (767.2 to 1753.5) | 7 (4 to 12)                        | 33.8 (20.3 to 53)   | 272 (174 to 410)                       | 1202.9 (793.8 to 1800.4) |
|                                  | Male   | 0 (0 to 0)          | 0.3 (0.2 to 0.6)      | 0 (0 to 0)             | 1.8 (1.2 to 2.8)         | 0 (0 to 0)          | 0.3 (0.2 to 0.5)    | 1 (0 to 1)                | 6.7 (4.2 to 11.7)      | 0 (0 to 0)                         | 0.2 (0.1 to 0.4)    | 1 (0 to 1)                             | 6.9 (4.4 to 12)         | 0 (0 to 0)             | 0.4 (0.3 to 0.6)       | 0 (0 to 1)                | 2.3 (1.5 to 3.4)        | 0 (0 to 0)          | 0.3 (0.2 to 0.5)    | 2 (1 to 3)                | 8 (5 to 12.6)            | 0 (0 to 0)                         | 0.3 (0.1 to 0.4)    | 2 (1 to 3)                             | 8.3 (5.2 to 13)          |
| Mauritania                       | Both   | 119 (87 to 159)     | 11.2 (8.3 to 14.9)    | 768 (588 to 983)       | 71.6 (55.3 to 90.9)      | 94 (70 to 125)      | 9.3 (7 to 12.3)     | 2858 (2066 to 3863)       | 256.6 (187.2 to 346)   | 66 (43 to 97)                      | 6.1 (4 to 8.8)      | 2924 (2109 to 3941)                    | 262.7 (191.8 to 353.3)  | 303 (213 to 406)       | 13.3 (9.4 to 17.8)     | 2186 (1584 to 2835)       | 93.9 (69.5 to 120.8)    | 193 (137 to 255)    | 9.1 (6.6 to 11.9)   | 5718 (3933 to 7678)       | 240.2 (165.6 to 320.8)   | 179 (111 to 266)                   | 7.7 (4.8 to 11.2)   | 5897 (4075 to 7919)                    | 247.9 (171.8 to 332.3)   |
|                                  | Female | 118 (86 to 158)     | 21.4 (15.7 to 28.5)   | 764 (584 to 979)       | 136.9 (105.5 to 174.3)   | 94 (69 to 125)      | 17.5 (13.1 to 23.2) | 2841 (2051 to 3841)       | 493.9 (360.2 to 668.8) | 65 (42 to 96)                      | 11.7 (7.6 to 17)    | 2906 (2098 to 3925)                    | 505.5 (369 to 682.5)    | 302 (212 to 404)       | 26.4 (18.6 to 35.1)    | 2177 (1577 to 2827)       | 185.9 (137.6 to 238.9)  | 192 (136 to 254)    | 18.1 (13.1 to 23.6) | 5689 (3919 to 7648)       | 473 (325.7 to 634.1)     | 178 (110 to 264)                   | 15.2 (9.4 to 22.1)  | 5868 (4056 to 7886)                    | 488.2 (338.6 to 654)     |
|                                  | Male   | 1 (0 to 1)          | 0.1 (0.1 to 0.2)      | 4 (3 to 5)             | 0.7 (0.5 to 1)           | 1 (0 to 1)          | 0.1 (0.1 to 0.2)    | 17 (11 to 25)             | 3.2 (2.1 to 4.8)       | 0 (0 to 1)                         | 0.1 (0 to 0.1)      | 17 (12 to 26)                          | 3.2 (2.2 to 4.9)        | 1 (1 to 2)             | 0.1 (0.1 to 0.2)       | 9 (5 to 14)               | 0.8 (0.5 to 1.2)        | 1 (1 to 2)          | 0.1 (0.1 to 0.2)    | 29 (17 to 46)             | 2.5 (1.5 to 4.1)         | 1 (0 to 2)                         | 0.1 (0 to 0.1)      | 29 (17 to 47)                          | 2.6 (1.5 to 4.2)         |
| Mauritius                        | Both   | 98 (89 to 108)      | 11.7 (10.6 to 12.8)   | 883 (796 to 980)       | 105.6 (95.1 to 118.1)    | 51 (46 to 55)       | 6.7 (6.1 to 7.2)    | 1622 (1488 to 1770)       | 188.2 (173 to 205.3)   | 65 (44 to 89)                      | 7.6 (5.2 to 10.4)   | 1687 (1553 to 1843)                    | 195.9 (180.3 to 214.5)  | 482 (382 to 601)       | 27.9 (22.1 to 34.6)    | 4220 (3459 to 5137)       | 242.5 (198.3 to 294.1)  | 205 (165 to 252)    | 11.9 (9.5 to 14.5)  | 5821 (4631 to 7248)       | 334.4 (266 to 414.4)     | 313 (211 to 444)                   | 18.1 (12.2 to 25.7) | 6133 (4868 to 7615)                    | 352.5 (279.7 to 437.3)   |
|                                  | Female | 98 (89 to 108)      | 21.9 (20 to 24.1)     | 881 (793 to 978)       | 198.5 (178.7 to 220.9)   | 50 (46 to 55)       | 12.1 (11.1 to 13.1) | 1615 (1481 to 1763)       | 357.3 (328.1 to 390.7) | 65 (44 to 89)                      | 14.4 (9.7 to 19.6)  | 1680 (1546 to 1836)                    | 371.8 (341.7 to 407.8)  | 481 (380 to 599)       | 53.5 (42.3 to 66.4)    | 4208 (3449 to 5121)       | 465.9 (379.6 to 568)    | 204 (164 to 251)    | 22 (17.7 to 27.1)   | 5795 (4610 to 7213)       | 643.5 (511 to 799.5)     | 311 (210 to 442)                   | 34.8 (23.4 to 49.5) | 6106 (4847 to 7583)                    | 678.2 (537 to 843.7)     |
|                                  | Male   | 0 (0 to 0)          | 0.1 (0.1 to 0.1)      | 3 (2 to 3)             | 0.6 (0.5 to 0.7)         | 0 (0 to 0)          | 0.1 (0.1 to 0.1)    | 7 (6 to 7)                | 1.7 (1.6 to 1.9)       | 0 (0 to 0)                         | 0.1 (0 to 0.1)      | 7 (6 to 8)                             | 1.8 (1.6 to 2)          | 2 (1 to 2)             | 0.2 (0.2 to 0.3)       | 13 (9 to 16)              | 1.5 (1.2 to 2)          | 1 (1 to 1)          | 0.1 (0.1 to 0.2)    | 26 (20 to 33)             | 3.2 (2.5 to 4)           | 1 (1 to 2)                         | 0.2 (0.1 to 0.2)    | 27 (21 to 34)                          | 3.3 (2.6 to 4.2)         |
| Mexico                           | Both   | 5864 (5683 to 6032) | 11.8 (11.4 to 12.2)   | 47821 (45777 to 49962) | 96.2 (91.5 to 101.6)     | 2837 (2745 to 2912) | 6.1 (5.9 to 6.3)    | 92488 (90131 to 94884)    | 177.4 (172.5 to 181.8) | 3447 (2476 to 4597)                | 6.9 (4.9 to 9.1)    | 95935 (93264 to 98734)                 | 184.2 (178.9 to 189.5)  | 24442 (19918 to 29949) | 19.6 (16 to 24)        | 208252 (172807 to 249729) | 166.9 (139 to 199.2)    | 8097 (6718 to 9852) | 6.7 (5.6 to 8.1)    | 241807 (197500 to 296971) | 191.3 (156.9 to 234.6)   | 14666 (9987 to 20413)              | 11.8 (8 to 16.3)    | 256474 (212636 to 312818)              | 203.1 (168.6 to 247.3)   |
|                                  | Female | 5833 (5653 to 5999) | 22.8 (22 to 23.5)     | 47579 (45535 to 49683) | 185.2 (176.2 to 195.4)   | 2815 (2724 to 2889) | 11.9 (11.4 to 12.2) | 91849 (89503 to 94236)    | 341.5 (332 to 350.1)   | 3426 (2462 to 4570)                | 13.2 (9.5 to 17.5)  | 95275 (92615 to 98076)                 | 354.7 (344.3 to 364.9)  | 24312 (19777 to 29810) | 36.8 (30 to 45)        | 207280 (171791 to 248701) | 313.4 (260.5 to 374.7)  | 8024 (6649 to 9777) | 12.5 (10.3 to 15.2) | 239911 (195552 to 295036) | 359.1 (293.7 to 441.1)   | 14578 (9914 to 20277)              | 22.1 (15 to 30.6)   | 254489 (210687 to 310666)              | 381.1 (315.7 to 464.6)   |
|                                  | Male   | 31 (30 to 32)       | 0.1 (0.1 to 0.1)      | 242 (213 to 280)       | 1 (0.9 to 1.2)           | 22 (21 to 23)       | 0.1 (0.1 to 0.1)    | 639 (617 to 660)          | 2.6 (2.5 to 2.7)       | 21 (15 to 28)                      | 0.1 (0.1 to 0.1)    | 660 (637 to 682)                       | 2.7 (2.6 to 2.8)        | 130 (104 to 161)       | 0.2 (0.2 to 0.3)       | 972 (794 to 1193)         | 1.7 (1.4 to 2.1)        | 73 (60 to 90)       | 0.1 (0.1 to 0.2)    | 1896 (1529 to 2338)       | 3.3 (2.7 to 4.1)         | 88 (59 to 125)                     | 0.2 (0.1 to 0.2)    | 1984 (1614 to 2427)                    | 3.5 (2.8 to 4.2)         |
| Micronesia (Federated States of) | Both   | 10 (7 to 13)        | 18.7 (14 to 24.8)     | 76 (60 to 97)          | 145.2 (116.6 to 180.2)   | 7 (5 to 9)          | 14.5 (10.7 to 18.9) | 233 (174 to 316)          | 420.1 (314.9 to 561)   | 6 (4 to 9)                         | 11 (7.2 to 15.8)    | 239 (178 to 323)                       | 431.1 (322.7 to 573.6)  | 28 (16 to 46)          | 34.7 (21.1 to 56.1)    | 212 (130 to 335)          | 257.9 (167.3 to 392.7)  | 16 (10 to 26)       | 22.8 (14.7 to 35.7) | 523 (290 to 867)          | 621.4 (366.6 to 1018.1)  | 17 (9 to 29)                       | 20.4 (11.3 to 34.7) | 540 (299 to 901)                       | 641.8 (379.6 to 1051.1)  |
|                                  | Female | 10 (7 to 13)        | 37.1 (27.8 to 49.5)   | 76 (60 to 97)          | 288.9 (230.8 to 361.2)   | 7 (5 to 9)          | 28.2 (20.9 to 37)   | 232 (173 to 314)          | 845.7 (633 to 1136)    | 6 (4 to 9)                         | 21.9 (14.2 to 31.8) | 237 (177 to 321)                       | 867.6 (646.6 to 1161.4) | 27 (16 to 46)          | 66.1 (39.5 to 107.4)   | 211 (130 to 333)          | 495.8 (316.3 to 765.2)  | 16 (10 to 26)       | 42.1 (26.9 to 66.5) | 520 (289 to 862)          | 1199.1 (693.3 to 1979.4) | 17 (9 to 29)                       | 39.2 (21.3 to 67.2) | 536 (297 to 896)                       | 1238.2 (715 to 2045.4)   |
|                                  | Male   | 0 (0 to 0)          | 0.3 (0.2 to 0.5)      | 0 (0 to 1)             | 2 (1.5 to 3)             | 0 (0 to 0)          | 0.3 (0.2 to 0.5)    | 2 (1 to 3)                | 6.8 (4.4 to 11.3)      | 0 (0 to 0)                         | 0.2 (0.1 to 0.3)    | 2 (1 to 3)                             | 7.1 (4.5 to 11.6)       | 0 (0 to 0)             | 0.5 (0.3 to 0.8)       | 1 (1 to 2)                | 3 (1.9 to 4.5)          | 0 (0 to 0)          | 0.4 (0.2 to 0.6)    | 3 (2 to 5)                | 9 (5 to 14)              | 0 (0 to 0)                         | 0.3 (0.2 to 0.5)    | 4 (2 to 5)                             | 9.4 (5.2 to 14.5)        |
| Monaco                           | Both   | 31 (24 to 40)       | 55.6 (42.4 to 71.4)   | 340 (277 to 414)       | 582.1 (472 to 712.6)     | 11 (8 to 14)        | 16.9 (12.9 to 21.4) | 232 (177 to 297)          | 426.4 (324.4 to 550.5) | 24 (16 to 34)                      | 42 (27.3 to 60.7)   | 256 (196 to 327)                       | 468.3 (356.2 to 605.3)  | 58 (42 to 73)          | 78.5 (57.3 to 101.6)   | 592 (474 to 719)          | 788.5 (623.5 to 978.4)  | 16 (12 to 19)       | 17.4 (12.9 to 21.7) | 311 (229 to 393)          | 427 (313.1 to 549.3)     | 43 (28 to 62)                      | 58.7 (38.2 to 85.7) | 354 (263 to 447)                       | 485.7 (357.5 to 631.2)   |
|                                  | Female | 31 (23 to 40)       | 102.1 (77.7 to 131.6) | 337 (274 to 411)       | 1065.2 (859.8 to 1309.4) | 11 (8 to 14)        | 29.8 (22.7 to 38)   | 229 (174 to 294)          | 787 (597.4 to 1021.9)  | 24 (16 to 34)                      | 77 (50.5 to 111.6)  | 253 (193 to 324)                       | 863.9 (654.6 to 1124.3) | 57 (41 to 72)          | 149.6 (108.7 to 193.8) | 586 (469 to 713)          | 1505 (1188.4 to 1875.1) | 16 (12 to 19)       | 32.1 (23.7 to 40.4) | 307 (226 to 387)          | 813.4 (594.5 to 1046.9)  | 43 (28 to 62)                      | 111.8 (72.5 to 164) | 350 (259 to 443)                       | 925.2 (678.7 to 1199.5)  |

|            |        | 1990                |                     |                        |                        |                     |                     |                           |                          |                                    |                     |                                        |                        | 2019                 |                      |                         |                        |                     |                     |                           |                         |                                    |                     |                                        |                         |
|------------|--------|---------------------|---------------------|------------------------|------------------------|---------------------|---------------------|---------------------------|--------------------------|------------------------------------|---------------------|----------------------------------------|------------------------|----------------------|----------------------|-------------------------|------------------------|---------------------|---------------------|---------------------------|-------------------------|------------------------------------|---------------------|----------------------------------------|-------------------------|
|            |        | Incidence           |                     | Prevalence             |                        | Deaths              |                     | YLLs (Years of Life Lost) |                          | YLDs (Years Lived with Disability) |                     | DALYs (Disability-Adjusted Life Years) |                        | Incidence            |                      | Prevalence              |                        | Deaths              |                     | YLLs (Years of Life Lost) |                         | YLDs (Years Lived with Disability) |                     | DALYs (Disability-Adjusted Life Years) |                         |
| Location   | Sex    | Number              | Rate                | Number                 | Rate                   | Number              | Rate                | Number                    | Rate                     | Number                             | Rate                | Number                                 | Rate                   | Number               | Rate                 | Number                  | Rate                   | Number              | Rate                | Number                    | Rate                    | Number                             | Rate                | Number                                 | Rate                    |
|            | Male   | 0 (0 to 1)          | 1.3 (1 to 1.9)      | 3 (2 to 4)             | 11.4 (8.5 to 15.5)     | 0 (0 to 0)          | 0.5 (0.4 to 0.7)    | 3 (2 to 4)                | 11.1 (8.1 to 14.9)       | 0 (0 to 0)                         | 1.1 (0.6 to 1.6)    | 3 (2 to 5)                             | 12.2 (8.9 to 16.3)     | 1 (1 to 1)           | 1.8 (1.3 to 2.5)     | 6 (4 to 8)              | 14.8 (11 to 19.8)      | 0 (0 to 0)          | 0.5 (0.4 to 0.7)    | 4 (3 to 6)                | 10.8 (7.9 to 14.6)      | 1 (0 to 1)                         | 1.4 (0.9 to 2.1)    | 5 (3 to 6)                             | 12.2 (9.1 to 16.3)      |
| Mongolia   | Both   | 75 (56 to 97)       | 6.4 (4.9 to 8.3)    | 706 (574 to 860)       | 63.1 (51.9 to 76)      | 50 (38 to 65)       | 4.6 (3.5 to 5.8)    | 1650 (1231 to 2167)       | 136.7 (102.3 to 179.5)   | 50 (32 to 73)                      | 4.3 (2.8 to 6.3)    | 1701 (1267 to 2231)                    | 141.1 (105.8 to 184)   | 283 (201 to 387)     | 9.9 (7.2 to 13.2)    | 2424 (1828 to 3149)     | 84.8 (66.2 to 107.4)   | 141 (101 to 191)    | 5.7 (4.3 to 7.6)    | 4640 (3288 to 6343)       | 154.2 (111.7 to 210)    | 185 (113 to 280)                   | 6.4 (4.1 to 9.4)    | 4825 (3414 to 6614)                    | 160.5 (116.2 to 217.6)  |
|            | Female | 74 (55 to 97)       | 12.2 (9.2 to 15.9)  | 703 (571 to 857)       | 118.1 (96.3 to 143)    | 50 (38 to 65)       | 8.5 (6.5 to 10.9)   | 1643 (1224 to 2159)       | 264.8 (197.4 to 349.7)   | 50 (32 to 72)                      | 8.2 (5.3 to 12)     | 1692 (1259 to 2221)                    | 273 (203.6 to 359.3)   | 282 (200 to 385)     | 17.9 (12.9 to 24)    | 2415 (1820 to 3138)     | 153.2 (118.7 to 195.3) | 140 (101 to 190)    | 9.9 (7.4 to 13.2)   | 4619 (3271 to 6319)       | 281.2 (202.7 to 383.1)  | 184 (112 to 278)                   | 11.5 (7.3 to 17.1)  | 4804 (3397 to 6592)                    | 292.7 (210.5 to 397.5)  |
|            | Male   | 0 (0 to 0)          | 0.1 (0 to 0.1)      | 3 (2 to 4)             | 0.5 (0.4 to 0.7)       | 0 (0 to 0)          | 0.1 (0 to 0.1)      | 8 (6 to 10)               | 1.3 (0.9 to 1.6)         | 0 (0 to 0)                         | 0 (0 to 0.1)        | 8 (6 to 10)                            | 1.3 (1 to 1.7)         | 1 (1 to 2)           | 0.1 (0.1 to 0.2)     | 9 (7 to 13)             | 0.8 (0.6 to 1.1)       | 1 (0 to 1)          | 0.1 (0.1 to 0.1)    | 20 (15 to 28)             | 1.7 (1.3 to 2.4)        | 1 (1 to 1)                         | 0.1 (0.1 to 0.1)    | 21 (15 to 29)                          | 1.8 (1.3 to 2.5)        |
| Montenegro | Both   | 211 (173 to 264)    | 33.1 (27.3 to 41.3) | 2016 (1689 to 2438)    | 317.4 (266.8 to 383.7) | 83 (68 to 101)      | 13.3 (11.1 to 16.3) | 2309 (1890 to 2862)       | 359.2 (295.2 to 445.4)   | 145 (97 to 211)                    | 22.8 (15.1 to 33.1) | 2454 (2012 to 3038)                    | 382 (314.5 to 472.1)   | 413 (329 to 508)     | 45.7 (36.3 to 56.2)  | 3976 (3306 to 4749)     | 434.8 (361.3 to 519.1) | 136 (111 to 164)    | 14.6 (11.9 to 17.6) | 3427 (2734 to 4218)       | 379 (302.3 to 465.8)    | 284 (190 to 400)                   | 31.4 (20.9 to 44.4) | 3711 (2965 to 4557)                    | 410.4 (327.9 to 505.2)  |
|            | Female | 209 (172 to 262)    | 60.9 (50.1 to 76.3) | 2001 (1675 to 2423)    | 581.6 (487.9 to 703.9) | 82 (68 to 100)      | 23.8 (19.7 to 29.1) | 2290 (1872 to 2838)       | 665 (545 to 826.3)       | 144 (96 to 208)                    | 41.9 (27.9 to 61)   | 2434 (1993 to 3006)                    | 706.8 (579 to 873.9)   | 409 (326 to 503)     | 86.1 (68.2 to 106.1) | 3941 (3280 to 4716)     | 818.6 (676.2 to 981.6) | 134 (109 to 163)    | 26.4 (21.4 to 31.9) | 3390 (2704 to 4174)       | 714.3 (567.8 to 881.2)  | 281 (188 to 396)                   | 59 (39.2 to 83.6)   | 3671 (2935 to 4511)                    | 773.3 (615.6 to 954.5)  |
|            | Male   | 2 (1 to 3)          | 0.7 (0.5 to 1)      | 15 (12 to 22)          | 5.5 (4.2 to 7.5)       | 1 (1 to 1)          | 0.3 (0.2 to 0.5)    | 19 (14 to 28)             | 6.8 (4.9 to 9.7)         | 1 (1 to 2)                         | 0.5 (0.3 to 0.8)    | 21 (15 to 30)                          | 7.3 (5.3 to 10.3)      | 4 (3 to 6)           | 1 (0.7 to 1.4)       | 35 (25 to 50)           | 8.1 (5.9 to 11.3)      | 2 (1 to 2)          | 0.4 (0.3 to 0.6)    | 37 (24 to 52)             | 8.4 (5.7 to 11.7)       | 3 (2 to 5)                         | 0.8 (0.4 to 1.2)    | 40 (27 to 57)                          | 9.2 (6.3 to 12.7)       |
| Morocco    | Both   | 2392 (1937 to 2883) | 14.7 (11.9 to 17.6) | 18899 (15798 to 22450) | 119 (100.2 to 140)     | 1508 (1222 to 1803) | 9.7 (7.9 to 11.5)   | 54762 (44026 to 66422)    | 327.5 (264.1 to 394.8)   | 1461 (959 to 2072)                 | 9 (5.9 to 12.8)     | 56223 (45172 to 68274)                 | 336.5 (271.6 to 405.8) | 9893 (7152 to 13669) | 26.9 (19.5 to 36.8)  | 83324 (62901 to 111307) | 228 (174.2 to 300.2)   | 4464 (3256 to 6065) | 12.6 (9.3 to 16.9)  | 154451 (111558 to 214911) | 413 (299.9 to 567.6)    | 6324 (3988 to 9489)                | 17.2 (11 to 25.4)   | 160775 (116654 to 222518)              | 430.2 (312.9 to 589.4)  |
|            | Female | 2348 (1891 to 2838) | 28.2 (22.6 to 33.9) | 18627 (15550 to 22171) | 229.6 (192.8 to 271.1) | 1472 (1187 to 1766) | 18.4 (14.9 to 22)   | 53860 (43121 to 65579)    | 631 (506.9 to 762.1)     | 1433 (933 to 2047)                 | 17.3 (11.3 to 24.5) | 55293 (44320 to 67421)                 | 648.3 (519.8 to 783.8) | 9755 (7043 to 13518) | 52.5 (38.2 to 72)    | 82405 (62167 to 109991) | 447.6 (341.1 to 590.6) | 4372 (3195 to 5942) | 24.4 (18.1 to 32.8) | 152269 (109531 to 212953) | 808.9 (585.5 to 1117.5) | 6234 (3944 to 9348)                | 33.6 (21.6 to 49.8) | 158502 (114796 to 219730)              | 842.5 (612.4 to 1157.9) |
|            | Male   | 44 (29 to 63)       | 0.7 (0.4 to 1)      | 272 (195 to 363)       | 4 (2.9 to 5.3)         | 36 (24 to 51)       | 0.6 (0.4 to 0.8)    | 902 (598 to 1270)         | 12.8 (8.4 to 17.9)       | 27 (17 to 41)                      | 0.4 (0.2 to 0.6)    | 930 (615 to 1309)                      | 13.2 (8.6 to 18.5)     | 137 (84 to 205)      | 0.9 (0.6 to 1.4)     | 919 (604 to 1324)       | 5.9 (4 to 8.4)         | 92 (58 to 139)      | 0.7 (0.4 to 1)      | 2182 (1370 to 3231)       | 13.8 (8.5 to 20.5)      | 90 (51 to 142)                     | 0.6 (0.3 to 0.9)    | 2272 (1425 to 3354)                    | 14.4 (9 to 21.4)        |
| Mozambique | Both   | 596 (450 to 760)    | 9 (7.1 to 11.2)     | 3845 (3067 to 4724)    | 55.8 (45.6 to 67)      | 493 (381 to 622)    | 8.1 (6.5 to 9.9)    | 16178 (12116 to 20996)    | 219 (167.8 to 278.7)     | 325 (213 to 462)                   | 4.7 (3.2 to 6.5)    | 16503 (12395 to 21432)                 | 223.7 (172.4 to 284)   | 1904 (1272 to 2680)  | 15.4 (10.9 to 21.3)  | 12285 (8430 to 16992)   | 92.4 (67 to 124.2)     | 1374 (955 to 1911)  | 12.5 (9.1 to 17)    | 43917 (28650 to 62920)    | 317.2 (215.8 to 445.8)  | 1061 (649 to 1607)                 | 8.1 (5.1 to 12)     | 44978 (29266 to 64027)                 | 325.3 (222 to 457.5)    |
|            | Female | 594 (448 to 757)    | 16.7 (13.2 to 20.9) | 3823 (3049 to 4701)    | 104.2 (84.9 to 125.2)  | 491 (379 to 619)    | 14.9 (11.9 to 18.3) | 16119 (12067 to 20941)    | 410.8 (314.2 to 523.8)   | 324 (211 to 460)                   | 8.8 (5.9 to 12.3)   | 16443 (12345 to 21376)                 | 419.6 (323 to 533.1)   | 1898 (1267 to 2672)  | 27.2 (19.1 to 37.6)  | 12231 (8385 to 16935)   | 166.1 (119 to 224.2)   | 1368 (951 to 1904)  | 21.5 (15.5 to 29.4) | 43751 (28507 to 62713)    | 572.9 (385.6 to 808.3)  | 1056 (644 to 1600)                 | 14.4 (9.1 to 21.6)  | 44807 (29109 to 63861)                 | 587.4 (397.4 to 827.9)  |
|            | Male   | 2 (2 to 3)          | 0.1 (0.1 to 0.1)    | 23 (18 to 29)          | 1 (0.7 to 1.3)         | 2 (1 to 3)          | 0.1 (0.1 to 0.1)    | 58 (43 to 79)             | 1.8 (1.3 to 2.5)         | 2 (1 to 3)                         | 0.1 (0 to 0.1)      | 60 (44 to 82)                          | 1.9 (1.4 to 2.5)       | 7 (5 to 9)           | 0.1 (0.1 to 0.2)     | 54 (42 to 69)           | 1.2 (0.9 to 1.5)       | 5 (4 to 7)          | 0.1 (0.1 to 0.2)    | 166 (119 to 225)          | 2.7 (1.9 to 3.7)        | 5 (3 to 7)                         | 0.1 (0.1 to 0.1)    | 171 (122 to 231)                       | 2.8 (2 to 3.8)          |
| Myanmar    | Both   | 6877 (4670 to 9633) | 24.8 (17.6 to 34.1) | 46024 (32129 to 62613) | 165.4 (119.8 to 221.5) | 5006 (3579 to 6838) | 18.9 (13.9 to 25.4) | 183742 (122718 to 255000) | 636.6 (439.6 to 873)     | 3897 (2319 to 5922)                | 13.8 (8.5 to 20.6)  | 187639 (125842 to 259629)              | 650.4 (450.8 to 891)   | 7623 (6052 to 9658)  | 14.9 (12 to 18.7)    | 64194 (52445 to 78502)  | 125.2 (104.2 to 151.6) | 4617 (3781 to 5787) | 9.6 (8 to 11.9)     | 142976 (112990 to 182080) | 271.8 (217.4 to 342.9)  | 4776 (3195 to 6862)                | 9.3 (6.3 to 13.2)   | 147752 (116978 to 188773)              | 281.1 (225.3 to 356.1)  |
|            | Female | 6846 (4648 to 9595) | 47.3 (33.3 to 65.1) | 45869 (31966 to 62450) | 315.8 (227.8 to 425)   | 4978 (3554 to 6800) | 35.7 (26.1 to 48.2) | 182967 (122258 to 254048) | 1223.6 (839.5 to 1679.6) | 3878 (2307 to 5891)                | 26.5 (16.1 to 39.5) | 186845 (125388 to 258800)              | 1250 (858.5 to 1716.9) | 7540 (5992 to 9563)  | 26.6 (21.4 to 33.5)  | 63731 (52085 to 77869)  | 224.6 (185.9 to 272.6) | 4556 (3731 to 5721) | 16.8 (13.9 to 20.8) | 141330 (111799 to 179715) | 489.1 (390.7 to 617.4)  | 4724 (3170 to 6785)                | 16.6 (11.1 to 23.7) | 146054 (115899 to 186264)              | 505.7 (404.8 to 641)    |

|             |        | 1990                  |                        |                           |                           |                     |                     |                           |                         |                                    |                      |                                        |                         | 2019                   |                       |                           |                          |                     |                     |                           |                         |                                    |                      |                                        |                         |
|-------------|--------|-----------------------|------------------------|---------------------------|---------------------------|---------------------|---------------------|---------------------------|-------------------------|------------------------------------|----------------------|----------------------------------------|-------------------------|------------------------|-----------------------|---------------------------|--------------------------|---------------------|---------------------|---------------------------|-------------------------|------------------------------------|----------------------|----------------------------------------|-------------------------|
|             |        | Incidence             |                        | Prevalence                |                           | Deaths              |                     | YLLs (Years of Life Lost) |                         | YLDs (Years Lived with Disability) |                      | DALYs (Disability-Adjusted Life Years) |                         | Incidence              |                       | Prevalence                |                          | Deaths              |                     | YLLs (Years of Life Lost) |                         | YLDs (Years Lived with Disability) |                      | DALYs (Disability-Adjusted Life Years) |                         |
| Location    | Sex    | Number                | Rate                   | Number                    | Rate                      | Number              | Rate                | Number                    | Rate                    | Number                             | Rate                 | Number                                 | Rate                    | Number                 | Rate                  | Number                    | Rate                     | Number              | Rate                | Number                    | Rate                    | Number                             | Rate                 | Number                                 | Rate                    |
|             | Male   | 32 (17 to 51)         | 0.3 (0.2 to 0.5)       | 155 (88 to 245)           | 1.3 (0.7 to 2)            | 27 (15 to 43)       | 0.3 (0.2 to 0.4)    | 775 (421 to 1235)         | 6.5 (3.5 to 10.4)       | 18 (9 to 31)                       | 0.2 (0.1 to 0.3)     | 793 (431 to 1258)                      | 6.7 (3.6 to 10.6)       | 83 (52 to 122)         | 0.4 (0.3 to 0.6)      | 464 (301 to 685)          | 2.1 (1.4 to 3.1)         | 61 (40 to 88)       | 0.3 (0.2 to 0.5)    | 1646 (1043 to 2434)       | 7.5 (4.9 to 10.9)       | 52 (29 to 82)                      | 0.3 (0.1 to 0.4)     | 1698 (1079 to 2519)                    | 7.8 (5.1 to 11.3)       |
| Namibia     | Both   | 92 (68 to 116)        | 12.1 (9.2 to 15)       | 629 (487 to 764)          | 82.3 (64.6 to 98.9)       | 71 (54 to 88)       | 9.7 (7.5 to 12)     | 2181 (1579 to 2798)       | 274.9 (200 to 347.7)    | 52 (33 to 72)                      | 6.7 (4.4 to 9.3)     | 2233 (1623 to 2859)                    | 281.6 (204 to 356.1)    | 436 (299 to 638)       | 28 (19.6 to 40.2)     | 3130 (2193 to 4504)       | 196.8 (141.6 to 277.1)   | 259 (181 to 371)    | 17.8 (12.8 to 24.8) | 7806 (5186 to 11633)      | 480.9 (328.7 to 704.3)  | 255 (152 to 401)                   | 16 (9.7 to 24.7)     | 8061 (5341 to 11992)                   | 496.9 (339 to 729)      |
|             | Female | 87 (64 to 111)        | 21.3 (16 to 26.8)      | 606 (465 to 735)          | 147.5 (115.1 to 177.9)    | 67 (50 to 84)       | 16.7 (12.7 to 20.9) | 2087 (1492 to 2685)       | 495.6 (356.5 to 634.9)  | 50 (32 to 69)                      | 12 (7.6 to 16.6)     | 2136 (1533 to 2757)                    | 507.6 (366.9 to 650.3)  | 423 (287 to 624)       | 48.2 (33.1 to 70.1)   | 3057 (2133 to 4410)       | 343.8 (244.4 to 489.3)   | 250 (173 to 358)    | 29.7 (20.9 to 41.7) | 7570 (4971 to 11292)      | 838.7 (563.5 to 1243.1) | 247 (146 to 388)                   | 27.8 (16.6 to 43.1)  | 7817 (5129 to 11680)                   | 866.4 (581.9 to 1283.1) |
|             | Male   | 4 (3 to 7)            | 1.6 (1.1 to 2.3)       | 23 (16 to 32)             | 7.4 (5.3 to 10.2)         | 4 (3 to 6)          | 1.6 (1.1 to 2.4)    | 94 (60 to 139)            | 30 (19.9 to 43.7)       | 3 (2 to 4)                         | 0.8 (0.5 to 1.3)     | 97 (62 to 142)                         | 30.9 (20.4 to 44.9)     | 13 (9 to 18)           | 2.4 (1.7 to 3.3)      | 73 (53 to 101)            | 12.4 (9 to 16.6)         | 10 (7 to 13)        | 2.1 (1.4 to 2.8)    | 236 (165 to 327)          | 39.5 (28.1 to 53.7)     | 8 (5 to 12)                        | 1.3 (0.8 to 2)       | 244 (171 to 338)                       | 40.9 (29.1 to 55.6)     |
| Nauru       | Both   | 1 (1 to 2)            | 22.7 (14.5 to 31.2)    | 10 (7 to 14)              | 192.5 (141.4 to 249.4)    | 1 (0 to 1)          | 14.8 (9.3 to 20)    | 25 (16 to 35)             | 427.3 (275.4 to 586.8)  | 1 (0 to 1)                         | 14.3 (8.6 to 21.4)   | 25 (17 to 36)                          | 441.6 (286.3 to 606.9)  | 2 (2 to 4)             | 39.9 (26.6 to 54.7)   | 21 (14 to 28)             | 334.8 (244.2 to 436)     | 1 (1 to 2)          | 21.7 (15.2 to 29)   | 41 (26 to 59)             | 629 (416.3 to 872.3)    | 2 (1 to 3)                         | 25.6 (15.5 to 38.2)  | 43 (27 to 61)                          | 654.6 (434.4 to 904.4)  |
|             | Female | 1 (1 to 2)            | 47.6 (30 to 65.6)      | 10 (7 to 14)              | 402.5 (293.2 to 523.5)    | 1 (0 to 1)          | 30.8 (19.2 to 41.9) | 24 (16 to 34)             | 899.4 (578.7 to 1242.7) | 1 (0 to 1)                         | 30 (17.8 to 44.9)    | 25 (16 to 36)                          | 929.4 (600.4 to 1281.2) | 2 (2 to 3)             | 75.5 (50.3 to 104)    | 20 (14 to 28)             | 626.1 (451.4 to 818.9)   | 1 (1 to 2)          | 41.4 (28.9 to 55.2) | 41 (25 to 58)             | 1187 (781 to 1646.6)    | 2 (1 to 3)                         | 48.1 (28.9 to 72.3)  | 43 (26 to 61)                          | 1235 (815.2 to 1707.5)  |
|             | Male   | 0 (0 to 0)            | 0.4 (0.2 to 0.6)       | 0 (0 to 0)                | 2.6 (1.9 to 3.8)          | 0 (0 to 0)          | 0.3 (0.2 to 0.5)    | 0 (0 to 0)                | 7.3 (4.4 to 11.6)       | 0 (0 to 0)                         | 0.3 (0.2 to 0.4)     | 0 (0 to 0)                             | 7.6 (4.6 to 11.9)       | 0 (0 to 0)             | 0.6 (0.3 to 0.9)      | 0 (0 to 0)                | 3.8 (2.5 to 5.7)         | 0 (0 to 0)          | 0.4 (0.3 to 0.6)    | 0 (0 to 0)                | 9.8 (5.8 to 15.5)       | 0 (0 to 0)                         | 0.4 (0.2 to 0.7)     | 0 (0 to 0)                             | 10.2 (6 to 16.1)        |
| Nepal       | Both   | 942 (631 to 1338)     | 8.4 (5.6 to 11.7)      | 6245 (4607 to 8383)       | 56.7 (42.2 to 74.7)       | 730 (485 to 1023)   | 6.7 (4.4 to 9.3)    | 24769 (16712 to 35417)    | 210.2 (139.9 to 295.5)  | 521 (327 to 781)                   | 4.6 (2.9 to 6.9)     | 25290 (17021 to 36223)                 | 214.9 (143.4 to 302.2)  | 3716 (2723 to 4973)    | 15.3 (11.3 to 20.4)   | 27395 (20758 to 35734)    | 112.6 (86 to 146)        | 2254 (1673 to 3002) | 9.6 (7.1 to 12.7)   | 70200 (50970 to 94515)    | 283.9 (206.4 to 379.9)  | 2169 (1408 to 3199)                | 8.9 (5.8 to 13)      | 72369 (52531 to 97254)                 | 292.7 (213.9 to 392.3)  |
|             | Female | 929 (619 to 1325)     | 16.9 (11.1 to 23.7)    | 6183 (4546 to 8313)       | 115 (85.1 to 152.6)       | 718 (473 to 1010)   | 13.6 (8.8 to 18.8)  | 24465 (16386 to 35114)    | 426.5 (281.8 to 599.7)  | 513 (321 to 774)                   | 9.3 (5.9 to 13.9)    | 24979 (16690 to 35911)                 | 435.9 (288.3 to 613.2)  | 3687 (2699 to 4941)    | 28.8 (21.2 to 38.4)   | 27236 (20665 to 35584)    | 212.2 (162.1 to 276.3)   | 2231 (1654 to 2973) | 18.1 (13.4 to 23.8) | 69649 (50635 to 93870)    | 533.2 (387.8 to 712.8)  | 2151 (1396 to 3161)                | 16.7 (10.9 to 24.4)  | 71800 (52128 to 96448)                 | 549.9 (401.8 to 738)    |
|             | Male   | 13 (8 to 19)          | 0.3 (0.2 to 0.5)       | 61 (41 to 89)             | 1.2 (0.8 to 1.8)          | 12 (8 to 18)        | 0.3 (0.2 to 0.5)    | 304 (197 to 447)          | 6.3 (4 to 9.3)          | 7 (4 to 11)                        | 0.2 (0.1 to 0.3)     | 311 (201 to 456)                       | 6.5 (4.2 to 9.5)        | 29 (17 to 48)          | 0.3 (0.2 to 0.5)      | 159 (98 to 256)           | 1.4 (0.9 to 2.3)         | 23 (13 to 37)       | 0.2 (0.1 to 0.4)    | 551 (325 to 908)          | 5.1 (3 to 8.3)          | 18 (10 to 33)                      | 0.2 (0.1 to 0.3)     | 569 (335 to 935)                       | 5.2 (3.1 to 8.5)        |
| Netherlands | Both   | 10692 (9994 to 11397) | 57.2 (53.6 to 61)      | 112129 (102089 to 124123) | 593.2 (542.1 to 653.5)    | 3617 (3403 to 3770) | 18.7 (17.7 to 19.5) | 87136 (83861 to 90105)    | 471.5 (454.7 to 488)    | 8015 (5627 to 10807)               | 42.7 (29.9 to 57.6)  | 95151 (90977 to 99292)                 | 514.2 (492.3 to 536.2)  | 16707 (12927 to 21329) | 57.8 (44.5 to 74.3)   | 182747 (152619 to 221249) | 617.5 (507.7 to 759)     | 4350 (3894 to 4765) | 13.2 (11.9 to 14.3) | 87538 (80648 to 94476)    | 303.2 (281.3 to 326)    | 12756 (8522 to 18257)              | 43.9 (29.2 to 63.2)  | 100294 (91017 to 110124)               | 347.1 (316.8 to 380.8)  |
|             | Female | 10653 (9957 to 11359) | 107.1 (100.1 to 114.3) | 111747 (101746 to 123739) | 1100.5 (1006.4 to 1206.8) | 3601 (3388 to 3753) | 33.3 (31.6 to 34.6) | 86797 (83516 to 89740)    | 890.8 (859.5 to 920.9)  | 7981 (5602 to 10764)               | 79.7 (55.8 to 107.7) | 94778 (90607 to 98923)                 | 970.5 (929.3 to 1013)   | 16608 (12844 to 21207) | 111.5 (85.9 to 143.9) | 181807 (151682 to 220100) | 1193.6 (977.4 to 1473.2) | 4320 (3865 to 4729) | 24.1 (22 to 26.1)   | 86986 (80081 to 93914)    | 584.8 (542.6 to 628.2)  | 12671 (8466 to 18141)              | 84.9 (56.3 to 122.9) | 99656 (90341 to 109479)                | 669.7 (611.5 to 734.7)  |
|             | Male   | 39 (32 to 48)         | 0.5 (0.4 to 0.6)       | 383 (320 to 455)          | 4.6 (3.9 to 5.5)          | 15 (13 to 18)       | 0.2 (0.2 to 0.2)    | 339 (295 to 384)          | 4 (3.5 to 4.5)          | 34 (22 to 48)                      | 0.4 (0.3 to 0.6)     | 373 (326 to 425)                       | 4.4 (3.9 to 5)          | 99 (67 to 140)         | 0.6 (0.4 to 0.9)      | 940 (701 to 1266)         | 6.2 (4.6 to 8.1)         | 30 (24 to 37)       | 0.2 (0.2 to 0.2)    | 553 (455 to 680)          | 3.7 (3.1 to 4.5)        | 85 (51 to 131)                     | 0.6 (0.3 to 0.8)     | 638 (519 to 789)                       | 4.3 (3.5 to 5.2)        |
| New Zealand | Both   | 2187 (2039 to 2351)   | 58.8 (54.8 to 63.2)    | 22908 (20894 to 25439)    | 609.6 (558.3 to 673.3)    | 657 (623 to 688)    | 17.5 (16.6 to 18.4) | 17363 (16576 to 18136)    | 472.1 (450.1 to 492.8)  | 1637 (1140 to 2222)                | 43.7 (30.5 to 59.4)  | 18999 (18020 to 20002)                 | 515.8 (489.6 to 543.9)  | 3613 (2795 to 4659)    | 53.5 (41.1 to 69.1)   | 40468 (33710 to 49889)    | 581.2 (477.1 to 718.4)   | 769 (696 to 832)    | 10.5 (9.6 to 11.3)  | 18108 (16806 to 19444)    | 276.9 (257.7 to 297.3)  | 2794 (1795 to 4042)                | 41 (25.9 to 59.1)    | 20902 (19103 to 22926)                 | 317.8 (291.2 to 347.1)  |
|             | Female | 2183 (2035 to 2346)   | 111.7 (104.3 to 120.3) | 22877 (20863 to 25406)    | 1146.4 (1051.2 to 1264.6) | 653 (619 to 684)    | 32.1 (30.5 to 33.6) | 17265 (16481 to 18044)    | 906 (863.4 to 946)      | 1634 (1138 to 2218)                | 82.8 (57.6 to 112)   | 18899 (17921 to 19907)                 | 988.8 (937.6 to 1043.5) | 3605 (2787 to 4651)    | 101.2 (77.6 to 130.9) | 40411 (33657 to 49833)    | 1099.2 (901.8 to 1358.8) | 762 (689 to 824)    | 19.4 (17.9 to 20.9) | 17949 (16639 to 19290)    | 521.4 (485.5 to 560.1)  | 2789 (1791 to 4035)                | 77.6 (49 to 111.9)   | 20738 (18942 to 22756)                 | 599 (548.5 to 654.6)    |

|                 |        | 1990                |                     |                        |                        |                     |                     |                           |                        |                                    |                     |                                        | 2019                   |                        |                     |                           |                        |                       |                     |                           |                         |                                    |                     |                                        |                         |
|-----------------|--------|---------------------|---------------------|------------------------|------------------------|---------------------|---------------------|---------------------------|------------------------|------------------------------------|---------------------|----------------------------------------|------------------------|------------------------|---------------------|---------------------------|------------------------|-----------------------|---------------------|---------------------------|-------------------------|------------------------------------|---------------------|----------------------------------------|-------------------------|
|                 |        | Incidence           |                     | Prevalence             |                        | Deaths              |                     | YLLs (Years of Life Lost) |                        | YLDs (Years Lived with Disability) |                     | DALYs (Disability-Adjusted Life Years) |                        | Incidence              |                     | Prevalence                |                        | Deaths                |                     | YLLs (Years of Life Lost) |                         | YLDs (Years Lived with Disability) |                     | DALYs (Disability-Adjusted Life Years) |                         |
| Location        | Sex    | Number              | Rate                | Number                 | Rate                   | Number              | Rate                | Number                    | Rate                   | Number                             | Rate                | Number                                 | Rate                   | Number                 | Rate                | Number                    | Rate                   | Number                | Rate                | Number                    | Rate                    | Number                             | Rate                | Number                                 | Rate                    |
|                 | Male   | 4 (4 to 5)          | 0.2 (0.2 to 0.3)    | 31 (25 to 38)          | 1.8 (1.5 to 2.2)       | 4 (4 to 5)          | 0.3 (0.2 to 0.3)    | 98 (84 to 114)            | 5.6 (4.8 to 6.5)       | 3 (2 to 4)                         | 0.2 (0.1 to 0.2)    | 100 (86 to 117)                        | 5.8 (5 to 6.7)         | 8 (6 to 10)            | 0.2 (0.2 to 0.3)    | 57 (44 to 73)             | 1.7 (1.3 to 2.2)       | 8 (6 to 9)            | 0.2 (0.2 to 0.3)    | 159 (132 to 188)          | 4.8 (4 to 5.6)          | 5 (3 to 7)                         | 0.1 (0.1 to 0.2)    | 164 (136 to 194)                       | 4.9 (4.2 to 5.8)        |
| Nicaragua       | Both   | 135 (112 to 156)    | 7.3 (6.1 to 8.5)    | 1139 (974 to 1305)     | 63 (53.8 to 72.3)      | 69 (57 to 79)       | 4 (3.3 to 4.6)      | 2382 (1987 to 2733)       | 122.6 (101.6 to 140.9) | 82 (56 to 114)                     | 4.4 (3 to 6.2)      | 2464 (2055 to 2825)                    | 127 (105.5 to 146.2)   | 875 (698 to 1106)      | 18 (14.6 to 22.5)   | 7248 (5830 to 9065)       | 147.8 (120.6 to 183)   | 302 (248 to 371)      | 6.8 (5.6 to 8.1)    | 8685 (6910 to 10987)      | 173.2 (138.6 to 217.5)  | 520 (339 to 729)                   | 10.6 (7 to 14.8)    | 9204 (7295 to 11671)                   | 183.8 (147.4 to 230.6)  |
|                 | Female | 134 (111 to 154)    | 13.8 (11.4 to 16)   | 1130 (963 to 1296)     | 118.9 (101.5 to 136.4) | 68 (56 to 78)       | 7.3 (6.1 to 8.5)    | 2349 (1956 to 2700)       | 231.8 (191.7 to 267)   | 81 (55 to 113)                     | 8.3 (5.7 to 11.6)   | 2430 (2023 to 2792)                    | 240.1 (198.9 to 277)   | 869 (693 to 1099)      | 32.8 (26.5 to 41.1) | 7208 (5802 to 9019)       | 270.3 (219.7 to 335.8) | 299 (246 to 367)      | 12.1 (10 to 14.6)   | 8600 (6831 to 10885)      | 316.3 (252.5 to 397.8)  | 516 (336 to 723)                   | 19.4 (12.7 to 27.1) | 9116 (7221 to 11567)                   | 335.7 (268.6 to 422.4)  |
|                 | Male   | 2 (1 to 2)          | 0.2 (0.2 to 0.3)    | 10 (7 to 12)           | 1.2 (0.9 to 1.6)       | 1 (1 to 2)          | 0.2 (0.1 to 0.2)    | 33 (26 to 42)             | 4 (3.1 to 5.2)         | 1 (1 to 1)                         | 0.1 (0.1 to 0.2)    | 34 (27 to 43)                          | 4.2 (3.2 to 5.4)       | 6 (4 to 8)             | 0.3 (0.2 to 0.4)    | 40 (29 to 56)             | 1.9 (1.3 to 2.6)       | 3 (2 to 5)            | 0.2 (0.1 to 0.2)    | 85 (61 to 115)            | 4 (2.9 to 5.4)          | 4 (2 to 6)                         | 0.2 (0.1 to 0.3)    | 89 (64 to 120)                         | 4.2 (3 to 5.7)          |
| Niger           | Both   | 191 (137 to 262)    | 5.8 (4.1 to 7.9)    | 1284 (985 to 1663)     | 39 (30.9 to 49)        | 153 (110 to 210)    | 5 (3.6 to 6.9)      | 5215 (3736 to 7207)       | 141.6 (101.7 to 196)   | 108 (69 to 157)                    | 3.2 (2 to 4.6)      | 5323 (3807 to 7352)                    | 144.8 (104 to 200.4)   | 671 (446 to 1012)      | 7.5 (5.1 to 11.1)   | 4627 (3262 to 6698)       | 50.3 (36.4 to 70.5)    | 479 (324 to 713)      | 5.8 (4 to 8.5)      | 15573 (10342 to 23626)    | 160.1 (108.2 to 239.2)  | 387 (219 to 647)                   | 4.2 (2.5 to 6.8)    | 15959 (10594 to 24086)                 | 164.3 (111.1 to 245.5)  |
|                 | Female | 190 (135 to 260)    | 11.8 (8.4 to 16.2)  | 1274 (977 to 1653)     | 80.1 (62.9 to 101.4)   | 151 (108 to 209)    | 10.1 (7.2 to 13.8)  | 5169 (3688 to 7166)       | 291.8 (208.8 to 403.6) | 107 (68 to 156)                    | 6.6 (4.2 to 9.5)    | 5276 (3763 to 7292)                    | 298.4 (213.4 to 412.6) | 666 (442 to 1006)      | 14.4 (9.8 to 21.4)  | 4597 (3235 to 6665)       | 96.8 (70.1 to 135.7)   | 475 (321 to 708)      | 11.2 (7.7 to 16.3)  | 15450 (10237 to 23447)    | 307.1 (207.8 to 459.4)  | 384 (217 to 643)                   | 8 (4.7 to 13.1)     | 15833 (10538 to 23953)                 | 315.2 (212.8 to 472.6)  |
|                 | Male   | 2 (1 to 3)          | 0.1 (0.1 to 0.2)    | 10 (7 to 14)           | 0.5 (0.4 to 0.8)       | 2 (1 to 2)          | 0.1 (0.1 to 0.2)    | 46 (31 to 69)             | 2.6 (1.7 to 3.8)       | 1 (1 to 2)                         | 0.1 (0 to 0.1)      | 47 (31 to 70)                          | 2.7 (1.7 to 3.9)       | 5 (3 to 8)             | 0.1 (0.1 to 0.2)    | 30 (20 to 44)             | 0.7 (0.4 to 1)         | 4 (3 to 6)            | 0.1 (0.1 to 0.2)    | 123 (78 to 188)           | 2.7 (1.6 to 4.2)        | 3 (2 to 5)                         | 0.1 (0 to 0.1)      | 126 (80 to 192)                        | 2.8 (1.7 to 4.3)        |
| Nigeria         | Both   | 5361 (3797 to 7480) | 11.4 (8.2 to 15.6)  | 36169 (27166 to 48013) | 76.1 (58 to 99)        | 4142 (2960 to 5893) | 9.3 (6.8 to 13.1)   | 124185 (86572 to 180408)  | 246.8 (174.6 to 355.9) | 2975 (1851 to 4575)                | 6.2 (3.9 to 9.4)    | 127159 (89327 to 183731)               | 253 (179.9 to 364.2)   | 21190 (14416 to 29569) | 20.6 (14.4 to 28.2) | 149536 (105086 to 207459) | 142.1 (103 to 190.8)   | 13385 (9417 to 18494) | 14.3 (10.3 to 19.2) | 424625 (293684 to 611824) | 386.8 (270.6 to 537.6)  | 12294 (7458 to 18513)              | 11.6 (7.3 to 17.1)  | 436920 (303424 to 621718)              | 398.5 (281.2 to 550.4)  |
|                 | Female | 5330 (3772 to 7445) | 24.3 (17.3 to 33.7) | 35942 (26959 to 47769) | 163 (123.3 to 214.9)   | 4116 (2936 to 5866) | 19.3 (13.8 to 27.4) | 123430 (86014 to 179711)  | 545 (381.9 to 790.8)   | 2954 (1837 to 4544)                | 13.3 (8.4 to 20.5)  | 126384 (88635 to 183043)               | 558.3 (392 to 806.8)   | 21121 (14363 to 29478) | 38.8 (27 to 52.9)   | 149039 (104533 to 206888) | 266.7 (194 to 357.6)   | 13331 (9350 to 18430) | 27 (19.5 to 36.3)   | 423152 (292216 to 610423) | 724.2 (506.4 to 1006.2) | 12248 (7421 to 18455)              | 21.8 (13.7 to 32)   | 435400 (302154 to 619864)              | 746.1 (527.3 to 1029.7) |
|                 | Male   | 31 (21 to 45)       | 0.1 (0.1 to 0.2)    | 228 (165 to 308)       | 0.9 (0.7 to 1.2)       | 26 (17 to 38)       | 0.1 (0.1 to 0.2)    | 755 (510 to 1092)         | 2.9 (1.9 to 4.1)       | 21 (13 to 32)                      | 0.1 (0.1 to 0.1)    | 775 (525 to 1120)                      | 2.9 (2 to 4.3)         | 70 (49 to 98)          | 0.2 (0.1 to 0.2)    | 497 (361 to 670)          | 1.1 (0.8 to 1.4)       | 54 (39 to 76)         | 0.1 (0.1 to 0.2)    | 1473 (1021 to 2133)       | 3.1 (2.2 to 4.5)        | 47 (29 to 73)                      | 0.1 (0.1 to 0.2)    | 1520 (1068 to 2180)                    | 3.3 (2.3 to 4.6)        |
| Niue            | Both   | 0 (0 to 1)          | 22.5 (16.2 to 30.1) | 4 (3 to 5)             | 193 (150.7 to 243.3)   | 0 (0 to 0)          | 14 (10.4 to 18.4)   | 8 (6 to 10)               | 376.9 (269.7 to 502.8) | 0 (0 to 0)                         | 14.1 (8.9 to 20.5)  | 8 (6 to 11)                            | 391 (281.6 to 523.4)   | 1 (0 to 1)             | 35.5 (23.2 to 48.8) | 6 (4 to 8)                | 291.7 (208 to 384.2)   | 0 (0 to 0)            | 16.5 (11 to 21.9)   | 9 (6 to 12)               | 431.5 (281.9 to 592.7)  | 0 (0 to 1)                         | 22.7 (13.9 to 33.8) | 9 (6 to 13)                            | 454.2 (297.5 to 623.5)  |
|                 | Female | 0 (0 to 1)          | 41.4 (29.5 to 55.9) | 4 (3 to 5)             | 358.5 (277.5 to 454.5) | 0 (0 to 0)          | 24.6 (18.2 to 32.7) | 8 (6 to 10)               | 705.6 (498.4 to 948.3) | 0 (0 to 0)                         | 26.3 (16.4 to 38.6) | 8 (6 to 11)                            | 731.9 (520.7 to 986.4) | 1 (0 to 1)             | 67.6 (43.8 to 93.3) | 6 (4 to 8)                | 560.6 (395.6 to 744.5) | 0 (0 to 0)            | 30.1 (20.1 to 40.3) | 9 (6 to 12)               | 828.8 (538.4 to 1145.3) | 0 (0 to 1)                         | 43.5 (26.4 to 65)   | 9 (6 to 13)                            | 872.2 (567.4 to 1201)   |
|                 | Male   | 0 (0 to 0)          | 0.4 (0.2 to 0.5)    | 0 (0 to 0)             | 2.4 (1.8 to 3.3)       | 0 (0 to 0)          | 0.3 (0.2 to 0.4)    | 0 (0 to 0)                | 5.9 (3.8 to 8.6)       | 0 (0 to 0)                         | 0.2 (0.1 to 0.4)    | 0 (0 to 0)                             | 6.2 (4 to 9)           | 0 (0 to 0)             | 0.6 (0.4 to 0.8)    | 0 (0 to 0)                | 3.7 (2.6 to 5.1)       | 0 (0 to 0)            | 0.3 (0.2 to 0.5)    | 0 (0 to 0)                | 7.4 (5 to 10.6)         | 0 (0 to 0)                         | 0.4 (0.2 to 0.6)    | 0 (0 to 0)                             | 7.8 (5.2 to 11.2)       |
| North Macedonia | Both   | 498 (442 to 558)    | 24.8 (22 to 27.8)   | 4803 (4284 to 5403)    | 242.6 (215.6 to 274.5) | 240 (214 to 268)    | 12.4 (11.1 to 14)   | 7624 (6811 to 8500)       | 373.8 (334.4 to 416.6) | 338 (228 to 465)                   | 16.9 (11.4 to 23.1) | 7962 (7128 to 8862)                    | 390.6 (350.5 to 435.6) | 1168 (882 to 1513)     | 37.5 (28.3 to 48.8) | 10952 (8753 to 13676)     | 350.6 (281 to 437.6)   | 430 (335 to 542)      | 14.1 (11 to 17.6)   | 11139 (8461 to 14233)     | 357.5 (271.8 to 456.6)  | 787 (503 to 1162)                  | 25.2 (16.1 to 37.4) | 11925 (9034 to 15302)                  | 382.7 (291.1 to 488)    |
|                 | Female | 490 (434 to 551)    | 47.4 (42.1 to 53.3) | 4738 (4216 to 5336)    | 463.2 (411.4 to 524.4) | 236 (210 to 264)    | 23.5 (21 to 26.3)   | 7510 (6708 to 8377)       | 718.6 (643.1 to 801.9) | 332 (224 to 458)                   | 32.2 (21.8 to 44.2) | 7842 (7012 to 8739)                    | 750.8 (673 to 836.5)   | 1152 (869 to 1493)     | 72.9 (54.8 to 95.1) | 10816 (8639 to 13501)     | 681.1 (542.7 to 854.5) | 423 (330 to 533)      | 26.5 (20.6 to 33.2) | 10983 (8336 to 14053)     | 695.5 (526.2 to 891.4)  | 774 (493 to 1145)                  | 49 (31.2 to 72.7)   | 11757 (8898 to 15071)                  | 744.5 (563.7 to 953.4)  |
|                 | Male   | 8 (7 to 9)          | 0.8 (0.7 to 1)      | 65 (55 to 77)          | 7.1 (6 to 8.3)         | 4 (4 to 5)          | 0.5 (0.4 to 0.6)    | 115 (99 to 133)           | 12 (10.4 to 14)        | 6 (4 to 8)                         | 0.6 (0.4 to 0.9)    | 120 (104 to 141)                       | 12.6 (11 to 14.7)      | 16 (11 to 22)          | 1.1 (0.8 to 1.4)    | 135 (101 to 183)          | 9 (6.9 to 11.9)        | 6 (5 to 8)            | 0.5 (0.3 to 0.6)    | 156 (115 to 208)          | 10.3 (7.7 to 13.7)      | 12 (8 to 18)                       | 0.8 (0.5 to 1.2)    | 168 (124 to 224)                       | 11.1 (8.4 to 14.7)      |

|                          |        | 1990                  |                     |                         |                        |                      |                     |                           |                         |                                    |                     |                                        |                          | 2019                   |                      |                           |                        |                        |                     |                             |                         |                                    |                     |                                        |                           |
|--------------------------|--------|-----------------------|---------------------|-------------------------|------------------------|----------------------|---------------------|---------------------------|-------------------------|------------------------------------|---------------------|----------------------------------------|--------------------------|------------------------|----------------------|---------------------------|------------------------|------------------------|---------------------|-----------------------------|-------------------------|------------------------------------|---------------------|----------------------------------------|---------------------------|
|                          |        | Incidence             |                     | Prevalence              |                        | Deaths               |                     | YLLs (Years of Life Lost) |                         | YLDs (Years Lived with Disability) |                     | DALYs (Disability-Adjusted Life Years) |                          | Incidence              |                      | Prevalence                |                        | Deaths                 |                     | YLLs (Years of Life Lost)   |                         | YLDs (Years Lived with Disability) |                     | DALYs (Disability-Adjusted Life Years) |                           |
| Location                 | Sex    | Number                | Rate                | Number                  | Rate                   | Number               | Rate                | Number                    | Rate                    | Number                             | Rate                | Number                                 | Rate                     | Number                 | Rate                 | Number                    | Rate                   | Number                 | Rate                | Number                      | Rate                    | Number                             | Rate                | Number                                 | Rate                      |
| Northern Mariana Islands | Both   | 7 (5 to 9)            | 23.3 (17.9 to 29.7) | 61 (46 to 76)           | 205.3 (164.3 to 251.3) | 3 (2 to 3)           | 12.5 (9.7 to 15.6)  | 102 (74 to 131)           | 325.4 (247.4 to 411.6)  | 5 (3 to 7)                         | 15 (9.7 to 21)      | 106 (78 to 137)                        | 340.5 (259 to 431.3)     | 18 (14 to 23)          | 32.1 (25.2 to 40.4)  | 171 (140 to 209)          | 298.9 (246.7 to 361.8) | 7 (5 to 9)             | 13.9 (11.3 to 17.2) | 203 (158 to 261)            | 355.2 (282.3 to 449.7)  | 12 (8 to 18)                       | 21.3 (14.1 to 30.7) | 215 (167 to 275)                       | 376.5 (299 to 475)        |
|                          | Female | 7 (5 to 9)            | 56.8 (43.2 to 72.6) | 60 (46 to 76)           | 503.9 (400.5 to 619.9) | 3 (2 to 3)           | 29.1 (22.6 to 36.4) | 101 (74 to 131)           | 803.8 (607.3 to 1021.1) | 5 (3 to 7)                         | 36.9 (23.7 to 52)   | 106 (78 to 137)                        | 840.6 (636.9 to 1064.9)  | 18 (14 to 23)          | 65.6 (51.6 to 82.7)  | 170 (139 to 208)          | 613.7 (505.4 to 744.2) | 7 (5 to 9)             | 27.5 (22.2 to 34.3) | 202 (157 to 260)            | 729.2 (577.1 to 925.7)  | 12 (8 to 18)                       | 43.8 (28.7 to 63.4) | 214 (166 to 273)                       | 773 (612.7 to 979.8)      |
|                          | Male   | 0 (0 to 0)            | 0.1 (0.1 to 0.2)    | 0 (0 to 0)              | 1.6 (1.3 to 2.2)       | 0 (0 to 0)           | 0.1 (0.1 to 0.1)    | 0 (0 to 0)                | 2.2 (1.5 to 3.2)        | 0 (0 to 0)                         | 0.1 (0.1 to 0.2)    | 0 (0 to 0)                             | 2.3 (1.6 to 3.4)         | 0 (0 to 0)             | 0.3 (0.2 to 0.4)     | 1 (1 to 1)                | 2.7 (2.1 to 3.4)       | 0 (0 to 0)             | 0.2 (0.1 to 0.2)    | 1 (1 to 1)                  | 3.6 (2.6 to 4.9)        | 0 (0 to 0)                         | 0.2 (0.1 to 0.3)    | 1 (1 to 2)                             | 3.8 (2.8 to 5.2)          |
| Norway                   | Both   | 2077 (1958 to 2194)   | 35.1 (33.1 to 37.1) | 23287 (20823 to 26232)  | 381.7 (347.4 to 423.8) | 875 (821 to 910)     | 13.7 (13 to 14.2)   | 19701 (18904 to 20324)    | 348.8 (336.2 to 359.2)  | 1585 (1107 to 2154)                | 26.5 (18.5 to 36.1) | 21286 (20351 to 22151)                 | 375.3 (359.5 to 389.8)   | 2927 (2351 to 3688)    | 35 (27.9 to 44.2)    | 34227 (29035 to 40158)    | 397.4 (335.1 to 470.5) | 797 (706 to 871)       | 8.3 (7.5 to 9)      | 16050 (14808 to 17364)      | 191.9 (178 to 207.1)    | 2291 (1526 to 3299)                | 27.2 (18.1 to 39.7) | 18341 (16769 to 20127)                 | 219.1 (201.5 to 240.6)    |
|                          | Female | 2017 (1900 to 2130)   | 64.6 (61 to 68.3)   | 22774 (20369 to 25700)  | 698.1 (636.9 to 772.3) | 850 (796 to 885)     | 24.3 (23.1 to 25.1) | 19175 (18390 to 19800)    | 651.5 (629 to 671.6)    | 1539 (1072 to 2091)                | 48.6 (33.8 to 66.1) | 20713 (19771 to 21577)                 | 700.1 (671.9 to 727.5)   | 2860 (2282 to 3605)    | 67.7 (53.6 to 85.8)  | 33510 (28411 to 39431)    | 766.8 (645.2 to 913.1) | 777 (688 to 851)       | 15.3 (13.9 to 16.6) | 15663 (14437 to 16940)      | 370.6 (344.2 to 400.2)  | 2233 (1482 to 3227)                | 52.6 (34.6 to 76.9) | 17896 (16351 to 19669)                 | 423.2 (389.1 to 465.2)    |
|                          | Male   | 60 (52 to 69)         | 2.2 (1.9 to 2.5)    | 514 (443 to 598)        | 18.6 (16.1 to 21.5)    | 24 (23 to 26)        | 0.9 (0.8 to 0.9)    | 526 (503 to 549)          | 19.7 (18.9 to 20.6)     | 47 (32 to 64)                      | 1.7 (1.2 to 2.3)    | 573 (544 to 603)                       | 21.4 (20.3 to 22.5)      | 68 (51 to 89)          | 1.6 (1.2 to 2.1)     | 717 (574 to 888)          | 16.6 (13.3 to 20.4)    | 20 (18 to 22)          | 0.5 (0.4 to 0.5)    | 387 (348 to 428)            | 9.2 (8.3 to 10.2)       | 58 (39 to 84)                      | 1.3 (0.9 to 2)      | 445 (396 to 496)                       | 10.6 (9.4 to 11.8)        |
| Oman                     | Both   | 75 (52 to 107)        | 9.3 (6.6 to 13.3)   | 707 (535 to 939)        | 91.9 (71.2 to 118.6)   | 40 (28 to 57)        | 5.8 (4.1 to 8.2)    | 1273 (887 to 1815)        | 147.5 (104.6 to 210.7)  | 51 (31 to 79)                      | 6.3 (4 to 9.7)      | 1324 (924 to 1885)                     | 153.8 (109.1 to 220.3)   | 448 (365 to 534)       | 19.5 (16.3 to 22.9)  | 4075 (3399 to 4798)       | 178.7 (154 to 205.2)   | 133 (111 to 158)       | 7.7 (6.5 to 9)      | 4199 (3449 to 5001)         | 175 (146.4 to 207)      | 305 (205 to 434)                   | 13 (8.8 to 17.9)    | 4504 (3688 to 5378)                    | 188 (157.8 to 222.1)      |
|                          | Female | 68 (46 to 99)         | 19.3 (13.2 to 28.4) | 655 (489 to 882)        | 193.9 (147.5 to 257)   | 35 (24 to 52)        | 10.9 (7.5 to 16.2)  | 1134 (765 to 1655)        | 312.9 (211.5 to 462.9)  | 46 (28 to 73)                      | 13.2 (8.1 to 20.7)  | 1180 (795 to 1718)                     | 326 (221.6 to 479.8)     | 427 (346 to 511)       | 44.7 (36.8 to 52.9)  | 3894 (3232 to 4600)       | 413.8 (351.7 to 479)   | 124 (102 to 147)       | 15.9 (13.3 to 18.9) | 3946 (3223 to 4725)         | 404.9 (335.3 to 480.9)  | 289 (193 to 412)                   | 29.9 (20.2 to 41.7) | 4235 (3446 to 5087)                    | 434.8 (359.1 to 519)      |
|                          | Male   | 7 (5 to 11)           | 2.3 (1.5 to 3.4)    | 52 (35 to 73)           | 13.6 (9.4 to 18.8)     | 5 (3 to 7)           | 1.8 (1.2 to 2.7)    | 139 (88 to 207)           | 35.5 (22.8 to 50.8)     | 5 (3 to 8)                         | 1.4 (0.7 to 2.1)    | 144 (92 to 212)                        | 36.9 (23.7 to 52.8)      | 21 (14 to 31)          | 2.5 (1.7 to 3.7)     | 181 (126 to 254)          | 18 (12.9 to 25.1)      | 9 (6 to 13)            | 1.4 (1 to 2.1)      | 253 (166 to 369)            | 24.6 (16.7 to 34.4)     | 16 (9 to 25)                       | 1.7 (1 to 2.6)      | 269 (178 to 393)                       | 26.3 (17.7 to 37)         |
| Pakistan                 | Both   | 12821 (9291 to 17372) | 20.3 (14.6 to 27.7) | 86028 (66842 to 111841) | 135.1 (105.5 to 174.6) | 9807 (7126 to 13283) | 16.2 (11.7 to 22.1) | 318724 (234369 to 424814) | 481.1 (352.4 to 646.2)  | 7092 (4533 to 10762)               | 11 (7.1 to 16.8)    | 325816 (239525 to 433840)              | 492.2 (360.7 to 660.9)   | 51438 (37937 to 69293) | 38.3 (28.8 to 51)    | 370695 (282410 to 487082) | 269.5 (210 to 347.2)   | 32118 (24388 to 43374) | 26.3 (20.2 to 34.9) | 1089396 (818685 to 1490050) | 761.6 (577.4 to 1028.9) | 29982 (19495 to 45430)             | 21.7 (14.3 to 32.2) | 1119378 (847412 to 1520925)            | 783.3 (597.3 to 1054.5)   |
|                          | Female | 12284 (8753 to 16839) | 41.8 (29.5 to 58.2) | 83434 (64416 to 109224) | 283.6 (219.1 to 370.3) | 9290 (6592 to 12742) | 33.2 (23.3 to 46.3) | 307813 (224089 to 413383) | 994.5 (715.6 to 1349.8) | 6808 (4321 to 10454)               | 22.9 (14.5 to 35)   | 314621 (228696 to 422261)              | 1017.4 (733.9 to 1381.6) | 50293 (36575 to 68299) | 76.5 (56.1 to 102.5) | 364325 (275411 to 480500) | 542.8 (418 to 704.5)   | 31177 (23333 to 42602) | 51.9 (39 to 69.8)   | 1066965 (793526 to 1468573) | 1526.7 (1141 to 2089.1) | 29324 (18998 to 44191)             | 43.4 (28.3 to 64.7) | 1096288 (818710 to 1501821)            | 1570.1 (1177.2 to 2135.5) |
|                          | Male   | 537 (413 to 697)      | 1.9 (1.4 to 2.4)    | 2594 (2091 to 3266)     | 8.4 (6.8 to 10.6)      | 517 (391 to 668)     | 1.9 (1.4 to 2.5)    | 10911 (8647 to 13973)     | 35.4 (27.7 to 45.3)     | 283 (187 to 403)                   | 0.9 (0.6 to 1.3)    | 11194 (8856 to 14337)                  | 36.3 (28.4 to 46.5)      | 1144 (798 to 1587)     | 2.3 (1.6 to 3.2)     | 6370 (4561 to 8752)       | 11.8 (8.7 to 15.9)     | 941 (665 to 1299)      | 2.1 (1.5 to 2.9)    | 22431 (15671 to 31116)      | 40 (28.4 to 54.9)       | 658 (408 to 971)                   | 1.3 (0.8 to 1.8)    | 23090 (16281 to 31864)                 | 41.3 (29.4 to 56.5)       |
| Palau                    | Both   | 3 (2 to 4)            | 27.6 (19.8 to 36.5) | 26 (20 to 33)           | 230.9 (179.1 to 290.8) | 2 (1 to 2)           | 15.9 (11.5 to 20.8) | 50 (35 to 67)             | 433.5 (308.5 to 578.3)  | 2 (1 to 3)                         | 17.4 (11 to 25.3)   | 52 (37 to 70)                          | 450.9 (321.9 to 603.6)   | 8 (6 to 11)            | 36.2 (26.9 to 47.3)  | 73 (57 to 93)             | 307.1 (243.1 to 383.4) | 3 (3 to 5)             | 17.1 (12.9 to 21.5) | 105 (76 to 138)             | 441.1 (323.2 to 572.9)  | 5 (3 to 8)                         | 23.4 (15.1 to 33.4) | 110 (80 to 145)                        | 464.4 (341.8 to 598.9)    |
|                          | Female | 3 (2 to 4)            | 54.6 (39 to 72.6)   | 26 (20 to 33)           | 458.8 (354.6 to 578.8) | 2 (1 to 2)           | 30.8 (22.1 to 40.3) | 49 (35 to 66)             | 862.5 (612.6 to 1154)   | 2 (1 to 3)                         | 34.6 (21.9 to 50.5) | 51 (37 to 69)                          | 897.1 (638 to 1202.2)    | 8 (6 to 11)            | 75.3 (55.3 to 99)    | 73 (57 to 93)             | 642 (502.5 to 808.3)   | 3 (3 to 4)             | 34 (25.5 to 43.1)   | 104 (76 to 138)             | 923.8 (675.2 to 1208)   | 5 (3 to 8)                         | 48.9 (31.3 to 70.4) | 110 (79 to 145)                        | 972.7 (713.6 to 1264.4)   |
|                          | Male   | 0 (0 to 0)            | 0.2 (0.2 to 0.4)    | 0 (0 to 0)              | 1.8 (1.3 to 2.7)       | 0 (0 to 0)           | 0.2 (0.1 to 0.3)    | 0 (0 to 0)                | 3.9 (2.5 to 6.4)        | 0 (0 to 0)                         | 0.2 (0.1 to 0.3)    | 0 (0 to 0)                             | 4.1 (2.6 to 6.6)         | 0 (0 to 0)             | 0.3 (0.2 to 0.5)     | 0 (0 to 0)                | 2.2 (1.5 to 3.3)       | 0 (0 to 0)             | 0.2 (0.1 to 0.3)    | 0 (0 to 1)                  | 4.3 (2.7 to 6.5)        | 0 (0 to 0)                         | 0.2 (0.1 to 0.4)    | 1 (0 to 1)                             | 4.5 (2.9 to 6.8)          |

|                  |        | 1990                   |                        |                           |                           |                        |                        |                              |                             |                                    |                        |                                        |                             | 2019                      |                        |                              |                           |                          |                        |                              |                              |                                    |                        |                                        |                            |
|------------------|--------|------------------------|------------------------|---------------------------|---------------------------|------------------------|------------------------|------------------------------|-----------------------------|------------------------------------|------------------------|----------------------------------------|-----------------------------|---------------------------|------------------------|------------------------------|---------------------------|--------------------------|------------------------|------------------------------|------------------------------|------------------------------------|------------------------|----------------------------------------|----------------------------|
|                  |        | Incidence              |                        | Prevalence                |                           | Deaths                 |                        | YLLs (Years of Life Lost)    |                             | YLDs (Years Lived with Disability) |                        | DALYs (Disability-Adjusted Life Years) |                             | Incidence                 |                        | Prevalence                   |                           | Deaths                   |                        | YLLs (Years of Life Lost)    |                              | YLDs (Years Lived with Disability) |                        | DALYs (Disability-Adjusted Life Years) |                            |
| Location         | Sex    | Number                 | Rate                   | Number                    | Rate                      | Number                 | Rate                   | Number                       | Rate                        | Number                             | Rate                   | Number                                 | Rate                        | Number                    | Rate                   | Number                       | Rate                      | Number                   | Rate                   | Number                       | Rate                         | Number                             | Rate                   | Number                                 | Rate                       |
| Palestine        | Both   | 177<br>(125 to 253)    | 18.4<br>(12.9 to 26.2) | 1492<br>(1126 to 2021)    | 155.4<br>(117.9 to 209)   | 97 (69 to 138)         | 10.7<br>(7.6 to 15.3)  | 3114<br>(2201 to 4422)       | 315.7<br>(220.5 to 447.1)   | 113 (69 to 178)                    | 11.6<br>(7.1 to 18.3)  | 3227<br>(2282 to 4578)                 | 327.2<br>(229.9 to 465.9)   | 845<br>(693 to 1019)      | 29.4<br>(24.1 to 35.3) | 7064<br>(5892 to 8412)       | 241.4<br>(203.1 to 285.3) | 339<br>(280 to 405)      | 13.5<br>(11.2 to 16.1) | 10684<br>(8802 to 12718)     | 357.8<br>(295.9 to 427.1)    | 541<br>(366 to 763)                | 18.4<br>(12.7 to 25.7) | 11225<br>(9233 to 13356)               | 376.2<br>(310.7 to 447.3)  |
|                  | Female | 176<br>(124 to 252)    | 33.5<br>(23.4 to 47.8) | 1483<br>(1117 to 2010)    | 282.7<br>(214.4 to 381.2) | 96 (68 to 137)         | 19.2<br>(13.6 to 27.6) | 3092<br>(2184 to 4404)       | 574.5<br>(400.6 to 816.8)   | 112 (68 to 177)                    | 21.1 (13 to 33.2)      | 3203<br>(2251 to 4558)                 | 595.6<br>(417.5 to 845.3)   | 840<br>(688 to 1012)      | 57.1<br>(46.9 to 68.8) | 7020<br>(5848 to 8365)       | 472.5<br>(396.9 to 558.4) | 336<br>(278 to 402)      | 25.5<br>(21.2 to 30.5) | 10601<br>(8731 to 12616)     | 702.9<br>(581.1 to 839.2)    | 537<br>(363 to 757)                | 36 (24.7 to 50.3)      | 11138<br>(9150 to 13244)               | 738.9<br>(609.5 to 879)    |
|                  | Male   | 1 (1 to 2)             | 0.3 (0.2 to 0.4)       | 10 (7 to 13)              | 2.3 (1.7 to 3.2)          | 1 (1 to 1)             | 0.2 (0.2 to 0.4)       | 23 (15 to 33)                | 5.2 (3.4 to 7.8)            | 1 (1 to 1)                         | 0.2 (0.1 to 0.3)       | 24 (16 to 34)                          | 5.4 (3.6 to 8.1)            | 5 (4 to 7)                | 0.5 (0.4 to 0.6)       | 43 (33 to 57)                | 3.5 (2.7 to 4.5)          | 3 (2 to 4)               | 0.3 (0.2 to 0.4)       | 83 (61 to 109)               | 6.4 (4.8 to 8.4)             | 4 (2 to 6)                         | 0.3 (0.2 to 0.5)       | 87 (64 to 114)                         | 6.7 (5.1 to 8.9)           |
| Panama           | Both   | 239<br>(218 to 263)    | 14.6<br>(13.4 to 16)   | 1953<br>(1780 to 2142)    | 119.3<br>(108.7 to 130.4) | 105 (97 to 114)        | 6.7 (6.2 to 7.3)       | 3234<br>(2987 to 3518)       | 192.1<br>(177.8 to 208.6)   | 141 (101 to 188)                   | 8.6 (6.1 to 11.5)      | 3375<br>(3109 to 3671)                 | 200.7<br>(185.6 to 218.2)   | 925<br>(699 to 1183)      | 22.1<br>(16.7 to 28.2) | 7861<br>(6062 to 9848)       | 188.1<br>(145.3 to 235.9) | 297<br>(228 to 376)      | 7.1 (5.4 to 9)         | 8083<br>(6089 to 10447)      | 192.4<br>(144.9 to 248.8)    | 554<br>(359 to 820)                | 13.3<br>(8.6 to 19.6)  | 8637<br>(6503 to 11131)                | 205.7<br>(155 to 264.8)    |
|                  | Female | 233<br>(212 to 257)    | 28.9<br>(26.4 to 31.7) | 1918<br>(1745 to 2109)    | 237.6<br>(215.9 to 260.3) | 101 (93 to 110)        | 13 (11.9 to 14.1)      | 3134<br>(2887 to 3416)       | 377.3<br>(348 to 410.5)     | 137 (98 to 184)                    | 16.9<br>(12.1 to 22.7) | 3271<br>(3008 to 3564)                 | 394.2<br>(363.1 to 430.2)   | 916<br>(692 to 1171)      | 43.1<br>(32.6 to 55.2) | 7798<br>(6014 to 9776)       | 368.5<br>(284.3 to 462.4) | 291<br>(224 to 370)      | 13.5<br>(10.4 to 17.1) | 7966<br>(5990 to 10301)      | 375<br>(282.1 to 485.1)      | 548<br>(354 to 812)                | 25.9<br>(16.7 to 38.4) | 8514<br>(6405 to 10975)                | 400.9<br>(301.4 to 517)    |
|                  | Male   | 6 (5 to 7)             | 0.8 (0.7 to 0.9)       | 35 (29 to 42)             | 4.5 (3.8 to 5.4)          | 4 (4 to 5)             | 0.6 (0.5 to 0.7)       | 100 (87 to 115)              | 12.8<br>(11.1 to 14.7)      | 4 (2 to 5)                         | 0.5 (0.3 to 0.6)       | 104 (90 to 118)                        | 13.3<br>(11.5 to 15.3)      | 9 (6 to 13)               | 0.5 (0.3 to 0.6)       | 63 (44 to 87)                | 3.1 (2.2 to 4.3)          | 5 (4 to 7)               | 0.3 (0.2 to 0.3)       | 117 (82 to 160)              | 5.7 (4 to 7.8)               | 6 (4 to 9)                         | 0.3 (0.2 to 0.5)       | 123 (86 to 169)                        | 6 (4.2 to 8.3)             |
| Papua New Guinea | Both   | 585<br>(433 to 769)    | 23.8<br>(17.8 to 30.8) | 4023<br>(3112 to 5070)    | 165.8<br>(132.2 to 206.2) | 405 (301 to 528)       | 17.6<br>(13.3 to 22.6) | 15189<br>(11170 to 19858)    | 587.2<br>(434.2 to 762.1)   | 340 (215 to 502)                   | 13.7<br>(8.8 to 19.7)  | 15529<br>(11428 to 20394)              | 600.9<br>(444.5 to 781.8)   | 2078<br>(1508 to 2827)    | 30.9<br>(22.9 to 41.5) | 14907<br>(11311 to 19751)    | 222.1<br>(173.2 to 286.8) | 1287<br>(944 to 1725)    | 20.8<br>(15.6 to 27.7) | 48651<br>(35406 to 65966)    | 686.1<br>(503.5 to 918.2)    | 1237<br>(779 to 1819)              | 18.1<br>(11.8 to 26.3) | 49888<br>(36209 to 67731)              | 704.2<br>(515.7 to 938.7)  |
|                  | Female | 583<br>(430 to 766)    | 49.3 (37 to 63.9)      | 4011<br>(3095 to 5053)    | 343.3<br>(272.6 to 427.9) | 404 (301 to 526)       | 36.4<br>(27.4 to 46.8) | 15138<br>(11115 to 19806)    | 1222.3<br>(904.7 to 1590.4) | 339 (214 to 501)                   | 28.4<br>(18.2 to 41.1) | 15477<br>(11345 to 20339)              | 1250.7<br>(923.8 to 1627.9) | 2071<br>(1503 to 2815)    | 64.5<br>(47.7 to 86.7) | 14863<br>(11272 to 19688)    | 464<br>(361.7 to 597)     | 1281<br>(937 to 1718)    | 43.5<br>(32.5 to 57.7) | 48475<br>(35196 to 65770)    | 1430.2<br>(1049.2 to 1912.6) | 1232<br>(776 to 1814)              | 37.8<br>(24.6 to 54.9) | 49707<br>(35973 to 67466)              | 1468<br>(1077.2 to 1956.4) |
|                  | Male   | 2 (1 to 4)             | 0.2 (0.1 to 0.4)       | 12 (7 to 21)              | 1.2 (0.7 to 2)            | 2 (1 to 3)             | 0.2 (0.1 to 0.4)       | 51 (27 to 95)                | 4.8 (2.4 to 9.1)            | 1 (1 to 3)                         | 0.1 (0.1 to 0.3)       | 53 (28 to 98)                          | 4.9 (2.5 to 9.3)            | 8 (4 to 14)               | 0.3 (0.2 to 0.6)       | 44 (26 to 76)                | 1.6 (1 to 2.8)            | 6 (3 to 12)              | 0.3 (0.1 to 0.5)       | 176 (94 to 328)              | 6.2 (3.3 to 11.9)            | 5 (2 to 9)                         | 0.2 (0.1 to 0.4)       | 181 (97 to 338)                        | 6.4 (3.4 to 12.3)          |
| Paraguay         | Both   | 287<br>(245 to 336)    | 11.8 (10 to 13.7)      | 2297<br>(1998 to 2642)    | 94 (81.4 to 107.6)        | 158 (135 to 182)       | 6.8 (5.8 to 7.8)       | 4876<br>(4195 to 5650)       | 192.5<br>(165.2 to 222.4)   | 166 (115 to 232)                   | 6.8 (4.6 to 9.3)       | 5042<br>(4336 to 5853)                 | 199.3<br>(170.8 to 231.2)   | 1348<br>(987 to 1737)     | 22.8<br>(16.9 to 29.3) | 10992<br>(8259 to 14018)     | 184.9<br>(140.2 to 234.1) | 540<br>(409 to 686)      | 9.5 (7.2 to 12.1)      | 15512<br>(11367 to 20090)    | 257<br>(190.6 to 332.2)      | 794<br>(508 to 1169)               | 13.4<br>(8.6 to 19.6)  | 16306<br>(12042 to 21214)              | 270.3<br>(201 to 350.3)    |
|                  | Female | 285<br>(243 to 333)    | 22.8<br>(19.4 to 26.5) | 2285<br>(1987 to 2630)    | 182.9<br>(158.4 to 209.2) | 156 (133 to 181)       | 12.9<br>(11.1 to 14.9) | 4837<br>(4158 to 5607)       | 376.3<br>(322.6 to 436.4)   | 165 (114 to 230)                   | 13.1 (9 to 18.1)       | 5002<br>(4299 to 5811)                 | 389.4<br>(332.6 to 452.6)   | 1341<br>(982 to 1726)     | 44.3<br>(32.7 to 57)   | 10945<br>(8221 to 13956)     | 361.5<br>(272.8 to 459.3) | 536<br>(406 to 682)      | 18 (13.7 to 23)        | 15399<br>(11264 to 19958)    | 502.3<br>(370.8 to 650)      | 790<br>(505 to 1162)               | 26.1<br>(16.7 to 38.3) | 16189<br>(11950 to 21080)              | 528.4<br>(392.2 to 686.1)  |
|                  | Male   | 2 (2 to 2)             | 0.2 (0.1 to 0.2)       | 12 (9 to 15)              | 1 (0.8 to 1.3)            | 1 (1 to 2)             | 0.1 (0.1 to 0.2)       | 39 (31 to 50)                | 3.4 (2.6 to 4.3)            | 1 (1 to 2)                         | 0.1 (0.1 to 0.2)       | 41 (31 to 51)                          | 3.5 (2.7 to 4.4)            | 7 (5 to 10)               | 0.3 (0.2 to 0.4)       | 47 (32 to 68)                | 1.7 (1.1 to 2.4)          | 4 (3 to 6)               | 0.2 (0.1 to 0.2)       | 113 (77 to 162)              | 3.9 (2.7 to 5.6)             | 5 (3 to 7)                         | 0.2 (0.1 to 0.3)       | 117 (80 to 168)                        | 4.1 (2.8 to 5.9)           |
| Peru             | Both   | 1398<br>(1182 to 1633) | 10.4<br>(8.8 to 12.1)  | 10508<br>(8976 to 12149)  | 77.8 (67 to 89.4)         | 851 (729 to 984)       | 6.7 (5.7 to 7.7)       | 27344<br>(23192 to 31773)    | 195.2<br>(165.7 to 226.4)   | 787 (533 to 1110)                  | 5.8 (3.9 to 8.1)       | 28131<br>(23828 to 32749)              | 201<br>(171.2 to 233.4)     | 4795<br>(3539 to 6383)    | 14.4<br>(10.7 to 19.2) | 40273<br>(30474 to 52270)    | 121.4<br>(92.2 to 157.5)  | 1872<br>(1420 to 2441)   | 5.7 (4.3 to 7.4)       | 52837<br>(38615 to 69964)    | 157.8<br>(115.8 to 209)      | 2868<br>(1810 to 4243)             | 8.6 (5.4 to 12.8)      | 55704<br>(40920 to 73973)              | 166.5<br>(122.7 to 220.4)  |
|                  | Female | 1378<br>(1163 to 1611) | 20.2 (17 to 23.5)      | 10399<br>(8879 to 12039)  | 151.6<br>(130.5 to 174.3) | 836 (716 to 967)       | 12.8 (11 to 14.9)      | 26925<br>(22843 to 31289)    | 379<br>(322.1 to 440.5)     | 776 (525 to 1096)                  | 11.2<br>(7.6 to 15.8)  | 27701<br>(23461 to 32208)              | 390.2<br>(331.3 to 453.6)   | 4743<br>(3502 to 6319)    | 27.6<br>(20.4 to 36.9) | 39928<br>(30152 to 51853)    | 233.4<br>(177 to 302.6)   | 1840<br>(1391 to 2398)   | 10.8<br>(8.1 to 14.1)  | 52093<br>(38164 to 69066)    | 301.7<br>(221.1 to 399.3)    | 2835<br>(1786 to 4195)             | 16.5<br>(10.4 to 24.6) | 54927<br>(40318 to 72923)              | 318.3<br>(234.5 to 421.2)  |
|                  | Male   | 19 (15 to 25)          | 0.3 (0.2 to 0.4)       | 109 (83 to 140)           | 1.7 (1.3 to 2.2)          | 16 (12 to 20)          | 0.3 (0.2 to 0.4)       | 419<br>(323 to 541)          | 6.5 (5 to 8.5)              | 11 (7 to 16)                       | 0.2 (0.1 to 0.3)       | 430<br>(332 to 556)                    | 6.7 (5.2 to 8.7)            | 52 (34 to 78)             | 0.3 (0.2 to 0.5)       | 345<br>(229 to 512)          | 2.2 (1.5 to 3.2)          | 32 (20 to 47)            | 0.2 (0.1 to 0.3)       | 744<br>(490 to 1119)         | 4.7 (3.1 to 7)               | 33 (19 to 54)                      | 0.2 (0.1 to 0.3)       | 777<br>(507 to 1171)                   | 4.9 (3.2 to 7.4)           |
| Philippines      | Both   | 6434<br>(5567 to 7312) | 18.3 (16 to 20.8)      | 50171<br>(44073 to 56754) | 139.5<br>(122.6 to 157.5) | 4006<br>(3508 to 4518) | 12.8<br>(11.1 to 14.3) | 130677<br>(114304 to 147748) | 353.3<br>(309.4 to 398.9)   | 3904<br>(2724 to 5344)             | 10.8<br>(7.6 to 14.6)  | 134581<br>(118028 to 151679)           | 364.1<br>(319.1 to 409.1)   | 19247<br>(14387 to 25103) | 21.3<br>(16.1 to 27.6) | 154998<br>(119738 to 196987) | 170.3<br>(133.6 to 214.3) | 10255<br>(7741 to 13310) | 12.3<br>(9.4 to 15.8)  | 331827<br>(247322 to 435843) | 356.2<br>(266.9 to 465.1)    | 12025<br>(7773 to 17618)           | 13.1<br>(8.6 to 18.9)  | 343852<br>(257829 to 449078)           | 369.3<br>(279.1 to 479.3)  |

|                   |        | 1990                    |                        |                           |                           |                        |                        |                              |                            |                                    |                        |                                        |                            | 2019                      |                          |                              |                            |                          |                        |                              |                           |                                    |                        |                                        |                            |
|-------------------|--------|-------------------------|------------------------|---------------------------|---------------------------|------------------------|------------------------|------------------------------|----------------------------|------------------------------------|------------------------|----------------------------------------|----------------------------|---------------------------|--------------------------|------------------------------|----------------------------|--------------------------|------------------------|------------------------------|---------------------------|------------------------------------|------------------------|----------------------------------------|----------------------------|
|                   |        | Incidence               |                        | Prevalence                |                           | Deaths                 |                        | YLLs (Years of Life Lost)    |                            | YLDs (Years Lived with Disability) |                        | DALYs (Disability-Adjusted Life Years) |                            | Incidence                 |                          | Prevalence                   |                            | Deaths                   |                        | YLLs (Years of Life Lost)    |                           | YLDs (Years Lived with Disability) |                        | DALYs (Disability-Adjusted Life Years) |                            |
| Location          | Sex    | Number                  | Rate                   | Number                    | Rate                      | Number                 | Rate                   | Number                       | Rate                       | Number                             | Rate                   | Number                                 | Rate                       | Number                    | Rate                     | Number                       | Rate                       | Number                   | Rate                   | Number                       | Rate                      | Number                             | Rate                   | Number                                 | Rate                       |
|                   | Female | 6372<br>(5498 to 7250)  | 35.4<br>(30.8 to 40.2) | 49755<br>(43711 to 56335) | 270.4<br>(237.1 to 306.1) | 3961<br>(3465 to 4470) | 24.5<br>(21.4 to 27.4) | 129342<br>(112870 to 146408) | 685.8<br>(599.4 to 775)    | 3863<br>(2694 to 5288)             | 20.8<br>(14.6 to 28.3) | 133205<br>(116653 to 150296)           | 706.6<br>(617.9 to 794.6)  | 19032<br>(14207 to 24890) | 40.6<br>(30.5 to 53)     | 153564<br>(118321 to 195677) | 326.5<br>(254.3 to 413.1)  | 10110<br>(7604 to 13135) | 22.8<br>(17.4 to 29.5) | 327666<br>(243031 to 430896) | 686.6<br>(511.4 to 899.1) | 11879<br>(7654 to 17379)           | 25.1<br>(16.3 to 36.4) | 339545<br>(253445 to 443335)           | 711.7<br>(534.1 to 924.4)  |
|                   | Male   | 61 (52 to 72)           | 0.4 (0.3 to 0.5)       | 417 (354 to 490)          | 2.5 (2.2 to 3)            | 45 (39 to 52)          | 0.3 (0.3 to 0.4)       | 1335 (1156 to 1533)          | 7.9 (6.8 to 9)             | 41 (28 to 56)                      | 0.3 (0.2 to 0.4)       | 1375 (1197 to 1570)                    | 8.2 (7.1 to 9.3)           | 216 (163 to 283)          | 0.6 (0.4 to 0.7)         | 1434 (1093 to 1859)          | 3.6 (2.8 to 4.6)           | 145 (110 to 190)         | 0.4 (0.3 to 0.5)       | 4161 (3136 to 5455)          | 10.1 (7.7 to 13.2)        | 146 (93 to 218)                    | 0.4 (0.2 to 0.6)       | 4307 (3277 to 5616)                    | 10.5 (8 to 13.7)           |
| Poland            | Both   | 9667<br>(9265 to 10093) | 22.7<br>(21.7 to 23.8) | 89589<br>(81825 to 98633) | 209.1<br>(191.4 to 230.1) | 5295<br>(5100 to 5438) | 12.6 (12 to 12.9)      | 143006<br>(139315 to 146707) | 334.6<br>(325.7 to 343.2)  | 6343<br>(4512 to 8529)             | 14.8<br>(10.5 to 19.9) | 149350<br>(145274 to 153729)           | 349.4<br>(339.7 to 359.5)  | 18756<br>(14673 to 23572) | 30.1<br>(23.6 to 38.3)   | 178260<br>(147165 to 216703) | 283.5<br>(231.8 to 347)    | 7572<br>(6063 to 9372)   | 11.1<br>(8.9 to 13.8)  | 166094<br>(132296 to 208995) | 265.2<br>(210.2 to 335.4) | 12661<br>(8386 to 18102)           | 20.4<br>(13.4 to 29.2) | 178755<br>(144376 to 222351)           | 285.6<br>(229.8 to 356.7)  |
|                   | Female | 9597<br>(9194 to 10022) | 40.9 (39 to 42.8)      | 88991<br>(81283 to 97888) | 374.2<br>(344.2 to 408.4) | 5258<br>(5065 to 5401) | 21.6<br>(20.8 to 22.2) | 142078<br>(138405 to 145759) | 608.3<br>(593 to 623.9)    | 6289<br>(4473 to 8447)             | 26.7<br>(18.9 to 35.9) | 148367<br>(144301 to 152750)           | 635.1<br>(618.3 to 653.5)  | 18544<br>(14430 to 23330) | 55.5<br>(43.2 to 70.9)   | 176495<br>(145516 to 214993) | 523.1<br>(426.2 to 643.8)  | 7491<br>(5993 to 9292)   | 19.2<br>(15.3 to 24)   | 164318<br>(130565 to 207131) | 487.6<br>(384.3 to 620.2) | 12497<br>(8285 to 17879)           | 37.7<br>(24.7 to 54.1) | 176815<br>(142437 to 220291)           | 525.3<br>(419.9 to 658.1)  |
|                   | Male   | 69 (61 to 79)           | 0.4 (0.3 to 0.4)       | 598 (509 to 697)          | 3.3 (2.8 to 3.9)          | 37 (35 to 40)          | 0.2 (0.2 to 0.2)       | 929 (881 to 983)             | 5 (4.8 to 5.3)             | 54 (37 to 76)                      | 0.3 (0.2 to 0.4)       | 983 (927 to 1041)                      | 5.3 (5 to 5.6)             | 213 (158 to 281)          | 0.7 (0.6 to 1)           | 1765 (1351 to 2277)          | 6.2 (4.8 to 7.8)           | 81 (63 to 102)           | 0.3 (0.2 to 0.4)       | 1776 (1371 to 2261)          | 6.2 (4.8 to 7.9)          | 164 (100 to 239)                   | 0.6 (0.4 to 0.8)       | 1940 (1515 to 2440)                    | 6.8 (5.3 to 8.5)           |
| Portugal          | Both   | 4421<br>(4152 to 4696)  | 35.5<br>(33.4 to 37.7) | 49575<br>(44368 to 55085) | 385.4<br>(347.8 to 424.3) | 1818<br>(1736 to 1899) | 14.3<br>(13.7 to 15)   | 47492<br>(45719 to 49314)    | 383<br>(368.3 to 397.8)    | 3358<br>(2329 to 4610)             | 26.6<br>(18.4 to 36.5) | 50850<br>(48684 to 53014)              | 409.6<br>(392.6 to 426.6)  | 7505<br>(5793 to 9736)    | 39.7<br>(30.3 to 52)     | 86203<br>(72465 to 104364)   | 441.8<br>(365 to 544)      | 2145<br>(1918 to 2358)   | 9.3 (8.5 to 10.2)      | 43660<br>(40040 to 47443)    | 231.2<br>(213.3 to 251.5) | 5814<br>(3829 to 8442)             | 30.6<br>(19.7 to 45.1) | 49474<br>(45014 to 54631)              | 261.8<br>(238.9 to 290)    |
|                   | Female | 4380<br>(4113 to 4652)  | 64.5<br>(60.7 to 68.7) | 49229<br>(44030 to 54727) | 696.9<br>(630.5 to 766.6) | 1796<br>(1713 to 1876) | 24.9<br>(23.8 to 26)   | 46985<br>(45196 to 48804)    | 701<br>(673.8 to 728.5)    | 3326<br>(2302 to 4570)             | 48.3<br>(33.4 to 66.5) | 50311<br>(48164 to 52446)              | 749.3<br>(718 to 781)      | 7438<br>(5736 to 9649)    | 73.3<br>(55.8 to 96.1)   | 85566<br>(71981 to 103441)   | 814.3<br>(670.8 to 1006.1) | 2120<br>(1894 to 2336)   | 16.4 (15 to 17.9)      | 43209<br>(39635 to 47007)    | 425.9<br>(392.8 to 463.2) | 5757<br>(3790 to 8368)             | 56.4<br>(36.2 to 83.4) | 48966<br>(44556 to 54122)              | 482.3<br>(439.7 to 535.7)  |
|                   | Male   | 41 (35 to 49)           | 0.7 (0.6 to 0.9)       | 345 (294 to 410)          | 6 (5.1 to 7)              | 23 (20 to 26)          | 0.4 (0.4 to 0.5)       | 506 (441 to 577)             | 8.9 (7.8 to 10)            | 32 (22 to 46)                      | 0.6 (0.4 to 0.8)       | 539 (468 to 612)                       | 9.4 (8.2 to 10.6)          | 67 (47 to 94)             | 0.7 (0.5 to 1)           | 637 (478 to 829)             | 6.6 (4.9 to 8.5)           | 25 (20 to 31)            | 0.2 (0.2 to 0.3)       | 451 (373 to 544)             | 4.9 (4.1 to 5.8)          | 57 (35 to 90)                      | 0.6 (0.4 to 0.9)       | 508 (418 to 620)                       | 5.5 (4.5 to 6.6)           |
| Puerto Rico       | Both   | 1029<br>(952 to 1110)   | 28.8<br>(26.7 to 31.1) | 8969<br>(8258 to 9660)    | 250.4<br>(230.9 to 269.9) | 370<br>(348 to 392)    | 10.5<br>(9.8 to 11.1)  | 10634<br>(10052 to 11264)    | 298.7<br>(282.1 to 316.6)  | 634<br>(446 to 862)                | 17.7<br>(12.4 to 24.1) | 11268<br>(10630 to 11968)              | 316.4<br>(298.7 to 336.1)  | 2222<br>(1709 to 2826)    | 38.7<br>(29.5 to 50.2)   | 20137<br>(16059 to 25001)    | 349.9<br>(276.6 to 442.5)  | 626<br>(491 to 787)      | 9.5 (7.4 to 12.2)      | 14367<br>(11097 to 18401)    | 259<br>(196.4 to 335.1)   | 1384<br>(921 to 1976)              | 24.2<br>(16.2 to 35)   | 15750<br>(12189 to 20164)              | 283.2<br>(215.6 to 364.9)  |
|                   | Female | 1014<br>(939 to 1095)   | 53.1<br>(49.2 to 57.3) | 8875<br>(8166 to 9561)    | 463.4<br>(426.7 to 499.9) | 361<br>(340 to 383)    | 18.9<br>(17.8 to 20.1) | 10433<br>(9855 to 11075)     | 548.6<br>(517.8 to 582.4)  | 624<br>(440 to 851)                | 32.6<br>(22.9 to 44.6) | 11057<br>(10422 to 11756)              | 581.3<br>(547.9 to 617.5)  | 2189<br>(1681 to 2788)    | 70.8<br>(53.9 to 91.9)   | 19895<br>(15871 to 24735)    | 641.2<br>(504.9 to 812)    | 610<br>(478 to 767)      | 16.9<br>(13.1 to 21.6) | 14037<br>(10842 to 17911)    | 471.5<br>(356.6 to 611)   | 1361<br>(908 to 1950)              | 44.2<br>(29.5 to 63.9) | 15398<br>(11913 to 19743)              | 515.6<br>(391.8 to 665.9)  |
|                   | Male   | 14 (12 to 17)           | 0.9 (0.7 to 1)         | 94 (77 to 113)            | 5.6 (4.6 to 6.7)          | 9 (7 to 10)            | 0.5 (0.5 to 0.6)       | 202 (172 to 234)             | 12.2<br>(10.4 to 14)       | 9 (6 to 13)                        | 0.6 (0.4 to 0.8)       | 211 (181 to 244)                       | 12.7<br>(10.9 to 14.7)     | 34 (23 to 48)             | 1.1 (0.8 to 1.6)         | 242 (169 to 343)             | 8.4 (5.9 to 12)            | 16 (12 to 22)            | 0.5 (0.4 to 0.7)       | 329 (234 to 454)             | 11.7<br>(8.3 to 16)       | 22 (14 to 35)                      | 0.8 (0.5 to 1.2)       | 352 (252 to 483)                       | 12.5<br>(8.9 to 17.2)      |
| Qatar             | Both   | 30 (24 to 39)           | 16.8<br>(12.6 to 22.5) | 260<br>(208 to 322)       | 142.3<br>(116.4 to 175.2) | 14 (11 to 18)          | 10.8<br>(7.9 to 14.7)  | 517<br>(401 to 660)          | 247.7<br>(187.1 to 328.8)  | 20 (13 to 29)                      | 10.4<br>(6.9 to 14.9)  | 537<br>(417 to 684)                    | 258.2<br>(195.6 to 341.4)  | 388<br>(287 to 509)       | 25.5<br>(19.8 to 32.1)   | 3468<br>(2633 to 4489)       | 216.8<br>(172.6 to 269.5)  | 88 (66 to 114)           | 9 (7.1 to 11.2)        | 3139<br>(2344 to 4107)       | 193.4<br>(150.1 to 243.2) | 260<br>(164 to 388)                | 16.3<br>(10.7 to 23.1) | 3399<br>(2551 to 4461)                 | 209.7<br>(162.5 to 262.5)  |
|                   | Female | 30 (23 to 38)           | 48.9 (37 to 64.6)      | 255<br>(202 to 317)       | 420.4<br>(341.4 to 522)   | 14 (11 to 17)          | 28.2<br>(20.9 to 38)   | 503<br>(388 to 645)          | 766.6<br>(582.2 to 1005.6) | 19 (13 to 28)                      | 30.8<br>(20.2 to 44.2) | 522<br>(405 to 667)                    | 797.4<br>(605.2 to 1045.6) | 382<br>(283 to 501)       | 103.7<br>(80.2 to 131.2) | 3410<br>(2589 to 4419)       | 880.3<br>(701.3 to 1098.3) | 86 (64 to 111)           | 36.9<br>(28.9 to 45.8) | 3070<br>(2292 to 4009)       | 790.6<br>(610.1 to 996.8) | 255<br>(160 to 379)                | 65.8<br>(43.5 to 92.9) | 3325<br>(2493 to 4364)                 | 856.4<br>(662.5 to 1074.6) |
|                   | Male   | 1 (0 to 1)              | 0.8 (0.5 to 1.2)       | 6 (4 to 8)                | 5.5 (3.7 to 7.9)          | 0 (0 to 1)             | 0.5 (0.3 to 0.8)       | 14 (8 to 21)                 | 12.5<br>(7.6 to 18.5)      | 0 (0 to 1)                         | 0.5 (0.3 to 0.8)       | 14 (8 to 21)                           | 13 (8 to 19.3)             | 6 (4 to 10)               | 0.9 (0.5 to 1.3)         | 59 (39 to 85)                | 7.2 (4.9 to 10.2)          | 2 (1 to 3)               | 0.4 (0.3 to 0.6)       | 69 (42 to 105)               | 7.7 (4.8 to 11.2)         | 5 (3 to 8)                         | 0.6 (0.3 to 1.1)       | 74 (44 to 112)                         | 8.4 (5.2 to 12)            |
| Republic of Korea | Both   | 3460<br>(3239 to 3716)  | 9.5 (8.9 to 10.2)      | 44949<br>(39714 to 51208) | 135.3<br>(117.8 to 156.1) | 1429<br>(1353 to 1512) | 4.3 (4.1 to 4.6)       | 48680<br>(46135 to 51532)    | 128.3<br>(121.6 to 135.7)  | 2898<br>(1939 to 4027)             | 8.3 (5.5 to 11.6)      | 51578<br>(48815 to 54682)              | 136.5<br>(129.1 to 144.8)  | 20328<br>(16423 to 24533) | 23.8<br>(19.3 to 28.7)   | 218097<br>(184776 to 253670) | 252.3<br>(214.7 to 294.3)  | 4090<br>(3603 to 4578)   | 4.7 (4.1 to 5.2)       | 107403<br>(95353 to 119372)  | 125.4<br>(111.6 to 138.9) | 15556<br>(10234 to 22523)          | 18.2 (12 to 26.3)      | 122960<br>(108643 to 138700)           | 143.6<br>(127 to 161.6)    |

|                       |        | 1990                      |                        |                              |                           |                           |                        |                              |                           |                                    |                        |                                        | 2019                      |                           |                        |                              |                           |                           |                        |                              |                           |                                    |                        |                                        |                           |
|-----------------------|--------|---------------------------|------------------------|------------------------------|---------------------------|---------------------------|------------------------|------------------------------|---------------------------|------------------------------------|------------------------|----------------------------------------|---------------------------|---------------------------|------------------------|------------------------------|---------------------------|---------------------------|------------------------|------------------------------|---------------------------|------------------------------------|------------------------|----------------------------------------|---------------------------|
|                       |        | Incidence                 |                        | Prevalence                   |                           | Deaths                    |                        | YLLs (Years of Life Lost)    |                           | YLDs (Years Lived with Disability) |                        | DALYs (Disability-Adjusted Life Years) |                           | Incidence                 |                        | Prevalence                   |                           | Deaths                    |                        | YLLs (Years of Life Lost)    |                           | YLDs (Years Lived with Disability) |                        | DALYs (Disability-Adjusted Life Years) |                           |
| Location              | Sex    | Number                    | Rate                   | Number                       | Rate                      | Number                    | Rate                   | Number                       | Rate                      | Number                             | Rate                   | Number                                 | Rate                      | Number                    | Rate                   | Number                       | Rate                      | Number                    | Rate                   | Number                       | Rate                      | Number                             | Rate                   | Number                                 | Rate                      |
|                       | Female | 3444<br>(3223 to 3702)    | 17.5<br>(16.4 to 18.8) | 44796<br>(39551 to 51041)    | 239.7<br>(209.7 to 275.4) | 1419<br>(1344 to 1502)    | 7.6 (7.2 to 8.1)       | 48393<br>(45835 to 51259)    | 240.2<br>(227.9 to 254)   | 2884<br>(1929 to 4007)             | 14.9<br>(9.9 to 20.8)  | 51278<br>(48509 to 54396)              | 255.1<br>(241.1 to 270.7) | 20251<br>(16357 to 24449) | 46.4<br>(37.6 to 56.1) | 217371<br>(184216 to 252723) | 488.5<br>(414.5 to 571.8) | 4063<br>(3582 to 4548)    | 8.7 (7.7 to 9.7)       | 106795<br>(94795 to 118833)  | 245.9<br>(218.9 to 272.7) | 15490<br>(10177 to 22417)          | 35.3<br>(23.1 to 51.3) | 122285<br>(107936 to 138057)           | 281.2<br>(247.8 to 316.6) |
|                       | Male   | 16 (13 to 19)             | 0.1 (0.1 to 0.2)       | 153 (126 to 187)             | 1.1 (0.9 to 1.4)          | 9 (8 to 11)               | 0.1 (0.1 to 0.1)       | 287 (247 to 336)             | 1.9 (1.7 to 2.3)          | 13 (9 to 18)                       | 0.1 (0.1 to 0.1)       | 300 (259 to 349)                       | 2 (1.8 to 2.4)            | 77 (55 to 105)            | 0.2 (0.2 to 0.3)       | 725 (550 to 961)             | 1.9 (1.5 to 2.4)          | 28 (21 to 35)             | 0.1 (0.1 to 0.1)       | 608 (467 to 766)             | 1.6 (1.3 to 2)            | 66 (42 to 105)                     | 0.2 (0.1 to 0.3)       | 674 (520 to 857)                       | 1.8 (1.4 to 2.2)          |
| Republic of Moldova   | Both   | 1074<br>(1007 to 1146)    | 23.5<br>(22.1 to 25.1) | 9900<br>(9021 to 10830)      | 218.5<br>(198.3 to 239.6) | 529<br>(501 to 558)       | 11.8<br>(11.2 to 12.4) | 16765<br>(15907 to 17670)    | 364<br>(345.5 to 383.8)   | 717<br>(502 to 967)                | 15.7 (11 to 21.2)      | 17482<br>(16564 to 18463)              | 379.7<br>(360 to 400.8)   | 1245<br>(1052 to 1469)    | 22.2<br>(18.9 to 26.5) | 12000<br>(10514 to 13784)    | 213.4<br>(187.5 to 246.8) | 512<br>(437 to 602)       | 9 (7.6 to 10.5)        | 13554<br>(11539 to 16039)    | 244.2<br>(207.7 to 288.9) | 854<br>(575 to 1193)               | 15.3<br>(10.4 to 21.4) | 14408<br>(12300 to 17075)              | 259.4<br>(220.8 to 307.8) |
|                       | Female | 1071<br>(1004 to 1143)    | 41.8<br>(39.2 to 44.6) | 9878<br>(8995 to 10805)      | 383.8<br>(348.6 to 419.4) | 528<br>(500 to 556)       | 20.5<br>(19.4 to 21.6) | 16721<br>(15864 to 17623)    | 653.3<br>(619.8 to 688.4) | 715<br>(501 to 964)                | 27.8<br>(19.5 to 37.5) | 17436<br>(16518 to 18415)              | 681.2<br>(644.5 to 719.3) | 1226<br>(1036 to 1448)    | 39.2<br>(33.2 to 46.8) | 11868<br>(10391 to 13651)    | 374.4<br>(327.6 to 434.3) | 504<br>(430 to 593)       | 15.3 (13 to 18)        | 13328<br>(11350 to 15777)    | 433.1<br>(367.8 to 513.3) | 841<br>(564 to 1173)               | 26.8<br>(18.1 to 37.5) | 14169<br>(12088 to 16799)              | 459.9<br>(391 to 546.7)   |
|                       | Male   | 3 (2 to 3)                | 0.1 (0.1 to 0.2)       | 22 (19 to 26)                | 1.2 (1 to 1.4)            | 2 (1 to 2)                | 0.1 (0.1 to 0.1)       | 44 (39 to 49)                | 2.3 (2 to 2.5)            | 2 (1 to 3)                         | 0.1 (0.1 to 0.2)       | 46 (41 to 51)                          | 2.4 (2.1 to 2.6)          | 19 (14 to 24)             | 0.8 (0.6 to 1)         | 132 (102 to 168)             | 5.4 (4.2 to 6.8)          | 8 (7 to 10)               | 0.4 (0.3 to 0.4)       | 226 (181 to 272)             | 9.2 (7.4 to 11.1)         | 13 (9 to 20)                       | 0.6 (0.4 to 0.8)       | 239 (192 to 289)                       | 9.8 (7.9 to 11.8)         |
| Romania               | Both   | 5009<br>(4753 to 5298)    | 18.3<br>(17.3 to 19.3) | 49190<br>(44566 to 54358)    | 178.7<br>(162.6 to 197.4) | 2619<br>(2508 to 2740)    | 9.6 (9.2 to 10)        | 77597<br>(74409 to 81268)    | 282.3<br>(270.7 to 295.3) | 3425<br>(2366 to 4707)             | 12.5<br>(8.6 to 17.1)  | 81022<br>(77540 to 85082)              | 294.7<br>(282.6 to 309.1) | 8751<br>(7089 to 10635)   | 27.3<br>(22.1 to 33.4) | 82199<br>(68867 to 96308)    | 254.4<br>(211.8 to 301.1) | 3661<br>(3007 to 4417)    | 10.4<br>(8.5 to 12.6)  | 86207<br>(69836 to 105031)   | 270.6<br>(218.2 to 331.9) | 5918<br>(4016 to 8266)             | 18.5<br>(12.4 to 26.3) | 92126<br>(74533 to 112708)             | 289.1<br>(233.2 to 355.4) |
|                       | Female | 4947<br>(4685 to 5243)    | 34.1<br>(32.4 to 36.2) | 48680<br>(44091 to 53808)    | 331.1<br>(302.2 to 364.3) | 2584<br>(2475 to 2704)    | 17.4<br>(16.7 to 18.3) | 76707<br>(73475 to 80286)    | 531.5<br>(509.3 to 556.3) | 3378<br>(2333 to 4640)             | 23.2<br>(16.1 to 32)   | 80085<br>(76593 to 83994)              | 554.8<br>(531.4 to 581.6) | 8592<br>(6966 to 10464)   | 50.9<br>(41.1 to 62.5) | 80939<br>(67860 to 94937)    | 473.4<br>(394.3 to 562.7) | 3595<br>(2951 to 4326)    | 18.5<br>(15.1 to 22.6) | 84701<br>(68612 to 103207)   | 504.4<br>(406.2 to 622)   | 5798<br>(3929 to 8101)             | 34.5 (23 to 49.1)      | 90499<br>(73158 to 110758)             | 538.9<br>(432.9 to 665.4) |
|                       | Male   | 62 (52 to 72)             | 0.5 (0.4 to 0.6)       | 511 (434 to 595)             | 4.1 (3.5 to 4.7)          | 35 (30 to 39)             | 0.3 (0.3 to 0.3)       | 890 (780 to 1022)            | 6.9 (6.1 to 7.8)          | 47 (32 to 65)                      | 0.4 (0.3 to 0.5)       | 937 (823 to 1076)                      | 7.3 (6.4 to 8.3)          | 160 (120 to 208)          | 1 (0.8 to 1.4)         | 1260 (963 to 1620)           | 8.3 (6.4 to 10.7)         | 66 (51 to 83)             | 0.4 (0.3 to 0.5)       | 1506 (1167 to 1875)          | 10 (7.8 to 12.5)          | 120 (74 to 178)                    | 0.8 (0.5 to 1.2)       | 1626 (1252 to 2026)                    | 10.8 (8.3 to 13.4)        |
| Russian Federation    | Both   | 37484<br>(36515 to 39077) | 21.2<br>(20.6 to 22.1) | 382312<br>(351083 to 422264) | 216.1<br>(198.9 to 238.5) | 16692<br>(16236 to 17297) | 9.5 (9.2 to 9.8)       | 481894<br>(469381 to 501524) | 270.6<br>(263.3 to 281.9) | 26160<br>(18379 to 35287)          | 14.8<br>(10.4 to 20)   | 508054<br>(493379 to 530549)           | 285.4<br>(276.8 to 298.5) | 68411<br>(55984 to 83181) | 31.3<br>(25.4 to 38.3) | 668142<br>(564736 to 785557) | 301.8<br>(253.9 to 357.2) | 23778<br>(19601 to 28319) | 10.4<br>(8.6 to 12.4)  | 596647<br>(483946 to 723409) | 272<br>(219.8 to 330.8)   | 47346<br>(31430 to 68619)          | 21.6<br>(14.3 to 31.4) | 643993<br>(535844 to 773926)           | 293.6<br>(243.3 to 354.3) |
|                       | Female | 36949<br>(35973 to 38510) | 36.1<br>(35.1 to 37.7) | 378238<br>(347047 to 417949) | 359.4<br>(334.1 to 390.7) | 16422<br>(15960 to 17015) | 15.1<br>(14.7 to 15.7) | 474529<br>(462130 to 494032) | 463.8<br>(451.6 to 484.1) | 25765<br>(18081 to 34761)          | 24.9<br>(17.6 to 33.7) | 500294<br>(485472 to 522525)           | 488.7<br>(473.8 to 512.3) | 67693<br>(55292 to 82510) | 54.4 (44 to 66.9)      | 662018<br>(559054 to 779062) | 521.7<br>(436.9 to 620.7) | 23486<br>(19329 to 27969) | 17 (13.9 to 20.5)      | 589540<br>(476530 to 715933) | 471.8<br>(379.7 to 577)   | 46779<br>(30993 to 67755)          | 37.5<br>(24.8 to 54.8) | 636320<br>(527775 to 766309)           | 509.3<br>(419.5 to 618.3) |
|                       | Male   | 535 (491 to 570)          | 0.8 (0.8 to 0.9)       | 4074 (3744 to 4395)          | 6.1 (5.6 to 6.6)          | 270 (247 to 286)          | 0.5 (0.4 to 0.5)       | 7364 (6758 to 7805)          | 10.9 (10 to 11.5)         | 395 (284 to 529)                   | 0.6 (0.4 to 0.8)       | 7760 (7122 to 8231)                    | 11.5 (10.5 to 12.1)       | 718 (586 to 866)          | 0.8 (0.7 to 1)         | 6124 (5152 to 7198)          | 6.9 (5.8 to 8.1)          | 292 (240 to 353)          | 0.3 (0.3 to 0.4)       | 7107 (5780 to 8648)          | 7.9 (6.5 to 9.6)          | 566 (377 to 806)                   | 0.6 (0.4 to 0.9)       | 7673 (6318 to 9250)                    | 8.6 (7.1 to 10.3)         |
| Rwanda                | Both   | 495 (375 to 640)          | 15.5 (12 to 19.5)      | 2904 (2242 to 3700)          | 87.1 (69.3 to 109)        | 405 (310 to 517)          | 13.5 (10.7 to 16.9)    | 13332 (9757 to 17480)        | 382.9 (290.7 to 494.3)    | 266 (169 to 375)                   | 8.1 (5.2 to 11.2)      | 13598 (9990 to 17829)                  | 390.9 (298.1 to 503.9)    | 1118 (816 to 1500)        | 16.8 (12.8 to 21.9)    | 7699 (5794 to 10166)         | 109 (85.2 to 140.4)       | 760 (572 to 998)          | 12.8 (9.9 to 16.3)     | 23355 (16893 to 32215)       | 320.3 (238.4 to 424.8)    | 643 (393 to 978)                   | 9.2 (5.8 to 13.5)      | 23999 (17398 to 32941)                 | 329.5 (245.8 to 436.3)    |
|                       | Female | 453 (339 to 599)          | 25.1 (18.8 to 32.6)    | 2727 (2077 to 3515)          | 146.9 (114.8 to 186.2)    | 365 (273 to 483)          | 21.4 (16.2 to 27.6)    | 12373 (9027 to 16531)        | 638.4 (473 to 848.1)      | 245 (154 to 354)                   | 13.2 (8.5 to 18.8)     | 12618 (9242 to 16855)                  | 651.7 (481.6 to 864.8)    | 1058 (774 to 1426)        | 27.3 (20.5 to 36)      | 7376 (5563 to 9771)          | 182.5 (141.7 to 236.3)    | 710 (531 to 941)          | 20 (15.4 to 25.6)      | 22153 (16022 to 30494)       | 532.8 (393.8 to 715.3)    | 610 (371 to 929)                   | 15.2 (9.5 to 22.6)     | 22763 (16390 to 31284)                 | 547.9 (405 to 733.6)      |
|                       | Male   | 42 (24 to 63)             | 3.7 (2.2 to 5.6)       | 177 (109 to 266)             | 14.4 (9 to 21.1)          | 40 (23 to 60)             | 3.8 (2.3 to 5.8)       | 959 (553 to 1453)            | 76.1 (45 to 114.2)        | 21 (11 to 35)                      | 1.8 (0.9 to 2.9)       | 980 (564 to 1490)                      | 77.9 (46.5 to 116.8)      | 60 (36 to 94)             | 2.9 (1.7 to 4.4)       | 323 (201 to 504)             | 13.7 (8.9 to 20.5)        | 50 (31 to 80)             | 2.7 (1.6 to 4.1)       | 1202 (712 to 1926)           | 49.4 (30.2 to 76.9)       | 34 (18 to 59)                      | 1.5 (0.8 to 2.5)       | 1236 (736 to 1973)                     | 50.9 (31.4 to 79.1)       |
| Saint Kitts and Nevis | Both   | 18 (16 to 20)             | 54.6 (47.9 to 61.2)    | 139 (122 to 155)             | 414.3 (366.7 to 463.4)    | 9 (8 to 10)               | 25.7 (22.9 to 28.3)    | 229 (204 to 255)             | 700.2 (619.7 to 780.4)    | 11 (8 to 14)                       | 31.7 (22.3 to 41.5)    | 240 (213 to 268)                       | 731.9 (648.2 to 816)      | 31 (23 to 40)             | 44.3 (32.8 to 56.9)    | 252 (189 to 324)             | 348.9 (263.7 to 443.9)    | 11 (8 to 13)              | 16.7 (13.4 to 20.8)    | 286 (204 to 373)             | 396.6 (287.3 to 518.1)    | 19 (12 to 28)                      | 26.8 (17.1 to 38.4)    | 305 (218 to 400)                       | 423.3 (306.5 to 550.7)    |

|                                  |        | 1990          |                     |                  |                        |               |                     |                           |                           |                                    |                     |                                        |                           | 2019          |                      |                  |                         |               |                     |                           |                        |                                    |                     |                                        |                         |
|----------------------------------|--------|---------------|---------------------|------------------|------------------------|---------------|---------------------|---------------------------|---------------------------|------------------------------------|---------------------|----------------------------------------|---------------------------|---------------|----------------------|------------------|-------------------------|---------------|---------------------|---------------------------|------------------------|------------------------------------|---------------------|----------------------------------------|-------------------------|
|                                  |        | Incidence     |                     | Prevalence       |                        | Deaths        |                     | YLLs (Years of Life Lost) |                           | YLDs (Years Lived with Disability) |                     | DALYs (Disability-Adjusted Life Years) |                           | Incidence     |                      | Prevalence       |                         | Deaths        |                     | YLLs (Years of Life Lost) |                        | YLDs (Years Lived with Disability) |                     | DALYs (Disability-Adjusted Life Years) |                         |
| Location                         | Sex    | Number        | Rate                | Number           | Rate                   | Number        | Rate                | Number                    | Rate                      | Number                             | Rate                | Number                                 | Rate                      | Number        | Rate                 | Number           | Rate                    | Number        | Rate                | Number                    | Rate                   | Number                             | Rate                | Number                                 | Rate                    |
|                                  | Female | 18 (16 to 20) | 98.8 (86.4 to 111)  | 137 (120 to 153) | 758.5 (670.1 to 850.3) | 8 (8 to 9)    | 44.7 (39.8 to 49.5) | 223 (198 to 249)          | 1273.9 (1121.2 to 1425.3) | 10 (7 to 14)                       | 57.6 (40.4 to 75.4) | 234 (207 to 261)                       | 1331.5 (1173.6 to 1489.9) | 30 (22 to 40) | 84.1 (61.5 to 108.9) | 247 (185 to 318) | 673.1 (504.5 to 861.6)  | 10 (8 to 13)  | 30 (23.6 to 37.5)   | 276 (196 to 362)          | 751.7 (534.8 to 985.8) | 19 (12 to 27)                      | 51 (32.4 to 73.9)   | 295 (211 to 387)                       | 802.8 (571.1 to 1054.3) |
|                                  | Male   | 0 (0 to 0)    | 2.4 (2.1 to 2.7)    | 2 (2 to 2)       | 13 (11 to 15.3)        | 0 (0 to 0)    | 1.8 (1.6 to 2.1)    | 6 (5 to 6)                | 37.3 (32.5 to 42.6)       | 0 (0 to 0)                         | 1.3 (0.9 to 1.9)    | 6 (5 to 7)                             | 38.6 (33.7 to 44.3)       | 1 (1 to 1)    | 2.4 (1.9 to 2.9)     | 5 (4 to 6)       | 14 (10.9 to 17.7)       | 0 (0 to 0)    | 1.4 (1.2 to 1.7)    | 10 (7 to 12)              | 28.9 (23 to 35.2)      | 0 (0 to 1)                         | 1.4 (0.9 to 2.1)    | 10 (8 to 13)                           | 30.3 (24 to 37.2)       |
| Saint Lucia                      | Both   | 26 (23 to 29) | 29.7 (26.6 to 32.8) | 201 (181 to 223) | 227.4 (204 to 252.4)   | 13 (12 to 15) | 16.1 (14.7 to 17.7) | 385 (349 to 424)          | 436.9 (395 to 482)        | 15 (11 to 20)                      | 16.9 (12 to 22.8)   | 400 (362 to 441)                       | 453.8 (409.7 to 501.1)    | 64 (53 to 77) | 29.2 (24.4 to 35)    | 524 (440 to 624) | 237.9 (201.2 to 282.4)  | 26 (21 to 30) | 12 (10.1 to 14.1)   | 702 (581 to 842)          | 318.6 (264.7 to 380.9) | 38 (26 to 52)                      | 17.2 (11.9 to 23.7) | 739 (612 to 884)                       | 335.8 (278.8 to 400.9)  |
|                                  | Female | 25 (23 to 28) | 53.2 (47.6 to 59)   | 198 (178 to 220) | 413.3 (371.3 to 459.9) | 13 (12 to 14) | 27.8 (25.2 to 30.6) | 377 (341 to 415)          | 791.7 (711.1 to 873.7)    | 15 (10 to 20)                      | 30.5 (21.5 to 41.3) | 392 (353 to 432)                       | 822.2 (740 to 909.9)      | 63 (52 to 75) | 55.3 (46.2 to 66.4)  | 516 (433 to 615) | 455.8 (384.5 to 542.5)  | 25 (21 to 29) | 21.7 (18.2 to 25.7) | 684 (567 to 822)          | 604.7 (501 to 725.6)   | 37 (25 to 51)                      | 32.7 (22.4 to 45.4) | 721 (596 to 862)                       | 637.4 (527.7 to 764.3)  |
|                                  | Male   | 0 (0 to 1)    | 1.3 (1.2 to 1.5)    | 3 (2 to 3)       | 7.1 (6.2 to 8.1)       | 0 (0 to 0)    | 1.1 (1 to 1.3)      | 8 (7 to 9)                | 22 (19.6 to 24.7)         | 0 (0 to 0)                         | 0.7 (0.5 to 1)      | 9 (8 to 10)                            | 22.7 (20.2 to 25.5)       | 1 (1 to 1)    | 1.2 (1 to 1.5)       | 8 (6 to 10)      | 7.8 (6.3 to 9.7)        | 1 (1 to 1)    | 0.9 (0.7 to 1)      | 17 (14 to 21)             | 17 (13.8 to 21)        | 1 (1 to 1)                         | 0.7 (0.5 to 1.1)    | 18 (15 to 22)                          | 17.7 (14.4 to 21.8)     |
| Saint Vincent and the Grenadines | Both   | 22 (19 to 24) | 30.9 (27.6 to 34.3) | 169 (152 to 187) | 238.3 (213.8 to 264.2) | 11 (10 to 13) | 16.6 (15.1 to 18.3) | 312 (281 to 346)          | 442 (396.8 to 491.2)      | 13 (9 to 17)                       | 17.7 (12.5 to 23.5) | 325 (293 to 360)                       | 459.7 (413.5 to 511.3)    | 45 (38 to 53) | 33.7 (28.7 to 39.7)  | 358 (308 to 420) | 264.3 (227.8 to 309.1)  | 20 (18 to 24) | 15.6 (13.5 to 18)   | 567 (483 to 665)          | 422 (359.4 to 494.5)   | 26 (18 to 36)                      | 19.6 (13.6 to 27)   | 593 (505 to 698)                       | 441.6 (376.8 to 519.6)  |
|                                  | Female | 21 (19 to 24) | 56.5 (50.4 to 63)   | 168 (151 to 185) | 441.5 (395.8 to 489.7) | 11 (10 to 12) | 29.3 (26.5 to 32.3) | 308 (277 to 341)          | 820.5 (735.4 to 914)      | 12 (9 to 17)                       | 32.6 (23.1 to 43.5) | 320 (288 to 355)                       | 853.1 (766.3 to 949.1)    | 45 (38 to 53) | 68.1 (57.9 to 80.4)  | 354 (305 to 416) | 538.7 (464.5 to 631.5)  | 20 (17 to 23) | 30.7 (26.5 to 35.5) | 557 (474 to 653)          | 852.3 (726.2 to 999.4) | 26 (18 to 36)                      | 39.6 (27.5 to 54.7) | 583 (496 to 687)                       | 891.9 (759.8 to 1050.9) |
|                                  | Male   | 0 (0 to 0)    | 0.9 (0.7 to 1)      | 2 (1 to 2)       | 4.8 (4.1 to 5.5)       | 0 (0 to 0)    | 0.7 (0.6 to 0.8)    | 5 (4 to 5)                | 14.2 (12.6 to 16.1)       | 0 (0 to 0)                         | 0.5 (0.3 to 0.7)    | 5 (4 to 5)                             | 14.7 (13 to 16.6)         | 1 (1 to 1)    | 0.9 (0.8 to 1.1)     | 4 (3 to 5)       | 5.4 (4.5 to 6.6)        | 0 (0 to 1)    | 0.7 (0.6 to 0.8)    | 10 (8 to 12)              | 14.1 (11.7 to 16.8)    | 0 (0 to 1)                         | 0.5 (0.4 to 0.8)    | 10 (8 to 12)                           | 14.7 (12.2 to 17.4)     |
| Samoa                            | Both   | 15 (11 to 20) | 15.9 (11.9 to 21.5) | 127 (100 to 163) | 135.9 (108.9 to 173.2) | 10 (7 to 13)  | 10.7 (8.2 to 14.2)  | 297 (220 to 404)          | 308.4 (230.2 to 417.5)    | 9 (6 to 14)                        | 9.9 (6.4 to 14.4)   | 307 (227 to 417)                       | 318.2 (237.5 to 429.4)    | 35 (23 to 57) | 22 (14.6 to 35)      | 294 (209 to 439) | 183.6 (132.6 to 269.9)  | 19 (13 to 30) | 12.5 (8.5 to 19.7)  | 582 (378 to 928)          | 355.3 (235 to 565.3)   | 22 (13 to 37)                      | 13.7 (8.2 to 22.9)  | 604 (395 to 960)                       | 369 (243.8 to 585.3)    |
|                                  | Female | 15 (11 to 20) | 31.1 (23.1 to 42.5) | 126 (99 to 162)  | 266.4 (213.1 to 341.8) | 9 (7 to 13)   | 20.5 (15.5 to 27.4) | 294 (217 to 401)          | 609.9 (452.5 to 827.9)    | 9 (6 to 14)                        | 19.3 (12.5 to 28.5) | 304 (224 to 414)                       | 629.2 (465.7 to 852.5)    | 35 (23 to 56) | 44 (29.2 to 70.4)    | 292 (207 to 436) | 368.5 (263.4 to 545.9)  | 19 (13 to 30) | 24.5 (16.6 to 38.8) | 577 (372 to 923)          | 716.9 (468.9 to 1146)  | 22 (13 to 37)                      | 27.4 (16.3 to 46)   | 599 (389 to 955)                       | 744.3 (488.4 to 1185.4) |
|                                  | Male   | 0 (0 to 0)    | 0.4 (0.2 to 0.5)    | 1 (1 to 1)       | 2.3 (1.7 to 3.1)       | 0 (0 to 0)    | 0.3 (0.2 to 0.4)    | 3 (2 to 4)                | 6.5 (4.3 to 9.3)          | 0 (0 to 0)                         | 0.2 (0.1 to 0.4)    | 3 (2 to 4)                             | 6.7 (4.5 to 9.6)          | 0 (0 to 0)    | 0.4 (0.3 to 0.6)     | 2 (1 to 3)       | 2.9 (2.1 to 4.1)        | 0 (0 to 0)    | 0.3 (0.2 to 0.5)    | 5 (4 to 8)                | 7.1 (4.7 to 10.5)      | 0 (0 to 0)                         | 0.3 (0.2 to 0.5)    | 6 (4 to 8)                             | 7.4 (4.9 to 11)         |
| San Marino                       | Both   | 10 (8 to 12)  | 32.9 (27.5 to 39.7) | 116 (99 to 136)  | 369.5 (317.1 to 428.9) | 4 (3 to 4)    | 11.1 (9.2 to 13.4)  | 78 (64 to 95)             | 257.6 (209.5 to 314.3)    | 8 (5 to 11)                        | 25.3 (16.9 to 35.9) | 86 (72 to 105)                         | 283 (232 to 345)          | 24 (18 to 33) | 44.3 (32.7 to 61.2)  | 252 (203 to 325) | 465 (368.7 to 606.6)    | 7 (4 to 10)   | 10.5 (6.8 to 15.8)  | 138 (88 to 210)           | 259.5 (160.9 to 406.8) | 18 (11 to 26)                      | 33.4 (20.9 to 50.1) | 155 (101 to 235)                       | 292.9 (189.4 to 452.9)  |
|                                  | Female | 10 (8 to 12)  | 62.6 (52.3 to 75.6) | 116 (99 to 135)  | 699.1 (597.1 to 813.2) | 4 (3 to 4)    | 20.1 (16.6 to 24.3) | 78 (64 to 95)             | 493.3 (398.3 to 602.4)    | 8 (5 to 11)                        | 48.2 (32.1 to 68.3) | 86 (71 to 104)                         | 541.5 (442 to 659.7)      | 24 (18 to 32) | 84.2 (61.8 to 116.4) | 251 (202 to 324) | 885.9 (701.9 to 1158.3) | 7 (4 to 10)   | 19.5 (12.6 to 29.6) | 137 (87 to 209)           | 493.1 (305.1 to 773.9) | 18 (11 to 26)                      | 63.5 (39.8 to 95.5) | 155 (101 to 234)                       | 556.6 (359.1 to 864.3)  |
|                                  | Male   | 0 (0 to 0)    | 0.3 (0.2 to 0.4)    | 0 (0 to 1)       | 3 (2.3 to 3.8)         | 0 (0 to 0)    | 0.1 (0.1 to 0.2)    | 0 (0 to 0)                | 2.4 (1.8 to 3.2)          | 0 (0 to 0)                         | 0.3 (0.2 to 0.4)    | 0 (0 to 1)                             | 2.7 (2 to 3.6)            | 0 (0 to 0)    | 0.4 (0.2 to 0.5)     | 1 (1 to 1)       | 3.6 (2.7 to 4.8)        | 0 (0 to 0)    | 0.1 (0.1 to 0.2)    | 1 (0 to 1)                | 2.3 (1.4 to 3.5)       | 0 (0 to 0)                         | 0.3 (0.2 to 0.5)    | 1 (0 to 1)                             | 2.6 (1.6 to 3.9)        |
| Sao Tome and Principe            | Both   | 5 (4 to 7)    | 8.3 (6.4 to 10.2)   | 39 (31 to 47)    | 60 (47.5 to 72.2)      | 4 (3 to 5)    | 6.6 (5.2 to 8.1)    | 123 (90 to 155)           | 184.1 (137 to 230.5)      | 3 (2 to 4)                         | 4.7 (3 to 6.6)      | 126 (92 to 159)                        | 188.8 (139.9 to 235.5)    | 21 (13 to 31) | 16.5 (10.4 to 24.3)  | 150 (101 to 219) | 116.9 (79.4 to 166.6)   | 12 (8 to 18)  | 10.8 (6.8 to 15.9)  | 387 (244 to 577)          | 291.3 (183.4 to 432.2) | 12 (7 to 20)                       | 9.5 (5.4 to 15.3)   | 399 (251 to 595)                       | 300.8 (189.9 to 446.2)  |
|                                  | Female | 5 (4 to 7)    | 15.6 (11.9 to 19.3) | 39 (30 to 47)    | 113.8 (89.8 to 136.6)  | 4 (3 to 5)    | 12.3 (9.7 to 15.2)  | 123 (90 to 155)           | 351 (260.3 to 440.4)      | 3 (2 to 4)                         | 9 (5.6 to 12.5)     | 126 (92 to 158)                        | 359.9 (266.4 to 449.7)    | 20 (13 to 31) | 32.1 (20.2 to 47.7)  | 150 (100 to 219) | 229.4 (155.2 to 329.1)  | 12 (8 to 18)  | 20.8 (13.1 to 30.7) | 385 (243 to 576)          | 573.3 (360.5 to 852.3) | 12 (7 to 20)                       | 18.7 (10.5 to 30)   | 398 (250 to 594)                       | 592 (372.7 to 880.2)    |

|              |        | 1990                |                     |                        |                        |                     |                     |                           |                        |                                    |                     |                                        |                        | 2019                |                      |                        |                        |                     |                     |                           |                        |                                    |                     |                                        |                         |
|--------------|--------|---------------------|---------------------|------------------------|------------------------|---------------------|---------------------|---------------------------|------------------------|------------------------------------|---------------------|----------------------------------------|------------------------|---------------------|----------------------|------------------------|------------------------|---------------------|---------------------|---------------------------|------------------------|------------------------------------|---------------------|----------------------------------------|-------------------------|
|              |        | Incidence           |                     | Prevalence             |                        | Deaths              |                     | YLLs (Years of Life Lost) |                        | YLDs (Years Lived with Disability) |                     | DALYs (Disability-Adjusted Life Years) |                        | Incidence           |                      | Prevalence             |                        | Deaths              |                     | YLLs (Years of Life Lost) |                        | YLDs (Years Lived with Disability) |                     | DALYs (Disability-Adjusted Life Years) |                         |
| Location     | Sex    | Number              | Rate                | Number                 | Rate                   | Number              | Rate                | Number                    | Rate                   | Number                             | Rate                | Number                                 | Rate                   | Number              | Rate                 | Number                 | Rate                   | Number              | Rate                | Number                    | Rate                   | Number                             | Rate                | Number                                 | Rate                    |
|              | Male   | 0 (0 to 0)          | 0.1 (0 to 0.1)      | 0 (0 to 0)             | 0.3 (0.2 to 0.4)       | 0 (0 to 0)          | 0 (0 to 0.1)        | 0 (0 to 1)                | 1.2 (0.8 to 1.6)       | 0 (0 to 0)                         | 0 (0 to 0)          | 0 (0 to 1)                             | 1.2 (0.8 to 1.6)       | 0 (0 to 0)          | 0.1 (0.1 to 0.1)     | 0 (0 to 0)             | 0.5 (0.4 to 0.7)       | 0 (0 to 0)          | 0.1 (0 to 0.1)      | 1 (1 to 2)                | 1.7 (1.2 to 2.4)       | 0 (0 to 0)                         | 0.1 (0 to 0.1)      | 1 (1 to 2)                             | 1.7 (1.2 to 2.4)        |
| Saudi Arabia | Both   | 475 (344 to 638)    | 6.1 (4.5 to 8.3)    | 4618 (3606 to 5835)    | 63.9 (51.4 to 78.3)    | 316 (225 to 432)    | 4.5 (3.3 to 6.2)    | 11074 (7848 to 15224)     | 130.7 (92.9 to 178.8)  | 327 (207 to 492)                   | 4.2 (2.7 to 6.3)    | 11400 (8121 to 15558)                  | 134.9 (97.2 to 185)    | 5371 (3870 to 7305) | 17.2 (12.8 to 22.7)  | 47484 (35066 to 63347) | 157 (122.8 to 200)     | 1428 (1049 to 1890) | 5.8 (4.5 to 7.6)    | 52977 (38260 to 71206)    | 166.3 (123.5 to 218.5) | 3603 (2267 to 5384)                | 11.5 (7.4 to 16.8)  | 56580 (40898 to 76008)                 | 177.8 (132.7 to 235.1)  |
|              | Female | 464 (331 to 626)    | 14.9 (10.8 to 20.1) | 4529 (3522 to 5739)    | 154.1 (123 to 191)     | 307 (219 to 422)    | 10.7 (7.7 to 14.8)  | 10830 (7622 to 14931)     | 326.1 (230.7 to 447.4) | 319 (201 to 481)                   | 10.3 (6.6 to 15.4)  | 11149 (7894 to 15281)                  | 336.4 (241.5 to 461.4) | 5330 (3833 to 7262) | 43.1 (31.9 to 57.1)  | 47120 (34765 to 62900) | 394.2 (306.8 to 503.5) | 1410 (1032 to 1868) | 14.3 (10.9 to 18.7) | 52462 (37864 to 70600)    | 417.4 (308.5 to 549.5) | 3571 (2240 to 5339)                | 28.8 (18.4 to 42.2) | 56033 (40441 to 75439)                 | 446.1 (332.2 to 589.5)  |
|              | Male   | 11 (7 to 16)        | 0.3 (0.2 to 0.5)    | 89 (66 to 119)         | 2.4 (1.8 to 3.2)       | 9 (6 to 12)         | 0.3 (0.2 to 0.4)    | 243 (161 to 364)          | 6.1 (4 to 8.8)         | 8 (5 to 12)                        | 0.2 (0.1 to 0.3)    | 251 (166 to 375)                       | 6.3 (4.2 to 9.1)       | 41 (27 to 59)       | 0.4 (0.3 to 0.5)     | 364 (259 to 516)       | 3.2 (2.3 to 4.3)       | 17 (12 to 25)       | 0.2 (0.1 to 0.3)    | 515 (346 to 748)          | 4.1 (2.8 to 5.8)       | 32 (19 to 51)                      | 0.3 (0.2 to 0.5)    | 547 (370 to 795)                       | 4.4 (3 to 6.2)          |
| Senegal      | Both   | 374 (283 to 465)    | 10.3 (7.9 to 12.7)  | 2491 (1994 to 3011)    | 67.9 (54.8 to 81.4)    | 288 (221 to 354)    | 8.5 (6.6 to 10.3)   | 9391 (7155 to 11713)      | 242.7 (184.8 to 303.2) | 210 (139 to 300)                   | 5.7 (3.8 to 8.1)    | 9600 (7294 to 11991)                   | 248.3 (189 to 309.3)   | 1281 (894 to 1678)  | 15.2 (10.9 to 19.9)  | 8919 (6602 to 11384)   | 103.2 (77.7 to 130.2)  | 875 (622 to 1146)   | 11.2 (8.1 to 14.6)  | 27319 (18838 to 36309)    | 305.7 (213.2 to 402.8) | 734 (451 to 1105)                  | 8.5 (5.4 to 12.5)   | 28053 (19361 to 37362)                 | 314.2 (218.8 to 413.5)  |
|              | Female | 372 (281 to 462)    | 20.4 (15.7 to 25.2) | 2478 (1983 to 2998)    | 134.6 (108.7 to 161.3) | 286 (219 to 352)    | 16.7 (13 to 20.4)   | 9334 (7104 to 11626)      | 478.6 (362.5 to 596.7) | 208 (138 to 297)                   | 11.2 (7.5 to 16)    | 9542 (7246 to 11940)                   | 489.8 (371.8 to 609.5) | 1275 (889 to 1671)  | 29.1 (20.8 to 38)    | 8883 (6567 to 11352)   | 198.2 (149.3 to 250.2) | 870 (617 to 1141)   | 21.3 (15.4 to 27.8) | 27179 (18738 to 36160)    | 586.4 (407.6 to 773.6) | 730 (448 to 1099)                  | 16.3 (10.2 to 24.1) | 27909 (19258 to 37198)                 | 602.6 (418.6 to 794.2)  |
|              | Male   | 2 (2 to 3)          | 0.1 (0.1 to 0.2)    | 13 (9 to 19)           | 0.7 (0.5 to 1)         | 2 (1 to 3)          | 0.1 (0.1 to 0.2)    | 57 (39 to 83)             | 3 (2.1 to 4.6)         | 1 (1 to 2)                         | 0.1 (0 to 0.1)      | 58 (40 to 85)                          | 3.1 (2.1 to 4.7)       | 6 (4 to 9)          | 0.2 (0.1 to 0.3)     | 37 (25 to 53)          | 0.9 (0.6 to 1.3)       | 5 (3 to 8)          | 0.1 (0.1 to 0.2)    | 139 (94 to 206)           | 3.4 (2.2 to 5)         | 4 (2 to 6)                         | 0.1 (0.1 to 0.2)    | 143 (97 to 212)                        | 3.5 (2.3 to 5.2)        |
| Serbia       | Both   | 3256 (2866 to 3720) | 28.7 (25.4 to 32.5) | 30903 (27241 to 34884) | 269.8 (238.4 to 304)   | 1607 (1413 to 1834) | 14.7 (12.9 to 16.7) | 45724 (40495 to 51630)    | 399.4 (356.1 to 448.7) | 2193 (1479 to 3018)                | 19.2 (13.2 to 26.5) | 47917 (42372 to 54256)                 | 418.7 (372.8 to 472)   | 6253 (4901 to 8029) | 44.4 (34.6 to 57)    | 57381 (46903 to 70661) | 404.4 (327.2 to 501.5) | 2394 (1920 to 2978) | 16 (12.8 to 19.9)   | 54466 (43076 to 68937)    | 389.4 (304.4 to 497.6) | 4211 (2783 to 6069)                | 29.9 (19.4 to 43.3) | 58677 (46385 to 74089)                 | 419.3 (330.5 to 531.4)  |
|              | Female | 3215 (2819 to 3678) | 53.8 (47.5 to 60.9) | 30583 (26906 to 34538) | 504.7 (446.6 to 569.2) | 1585 (1391 to 1811) | 26.8 (23.6 to 30.5) | 45170 (39957 to 51035)    | 753.4 (671.7 to 846)   | 2163 (1458 to 2975)                | 36 (24.7 to 49.4)   | 47333 (41840 to 53642)                 | 789.4 (703.6 to 887.4) | 6148 (4815 to 7880) | 83.5 (64.8 to 107.2) | 56568 (46219 to 69575) | 762.3 (615 to 949.9)   | 2350 (1886 to 2926) | 29.1 (23.2 to 36.2) | 53545 (42325 to 67600)    | 731.7 (570.2 to 938)   | 4134 (2731 to 5980)                | 56.1 (36.3 to 81.7) | 57679 (45709 to 72992)                 | 787.8 (619.8 to 1006.3) |
|              | Male   | 41 (28 to 55)       | 0.8 (0.6 to 1)      | 320 (242 to 419)       | 6 (4.6 to 7.8)         | 22 (16 to 30)       | 0.5 (0.3 to 0.6)    | 554 (397 to 737)          | 10.2 (7.3 to 13.3)     | 30 (19 to 46)                      | 0.6 (0.4 to 0.9)    | 584 (417 to 781)                       | 10.8 (7.8 to 14.1)     | 105 (67 to 154)     | 1.5 (1 to 2.2)       | 813 (556 to 1141)      | 11.7 (8.1 to 16.4)     | 44 (30 to 59)       | 0.6 (0.4 to 0.9)    | 922 (619 to 1293)         | 13.5 (9.2 to 18.6)     | 76 (45 to 120)                     | 1.1 (0.7 to 1.7)    | 998 (670 to 1393)                      | 14.6 (10 to 20.2)       |
| Seychelles   | Both   | 7 (7 to 9)          | 13.3 (11.8 to 15.2) | 65 (58 to 74)          | 115.9 (102.5 to 132)   | 5 (4 to 5)          | 8.4 (7.4 to 9.4)    | 140 (124 to 160)          | 249.7 (220.4 to 285.5) | 5 (3 to 7)                         | 8.5 (5.9 to 11.7)   | 145 (128 to 166)                       | 258.2 (227.9 to 294.8) | 33 (27 to 39)       | 27.4 (22.5 to 32.5)  | 282 (238 to 329)       | 232.7 (197.2 to 269.9) | 15 (12 to 18)       | 13.1 (10.9 to 15.4) | 436 (359 to 526)          | 356.7 (294.5 to 427.9) | 21 (14 to 30)                      | 17.5 (11.9 to 24.4) | 457 (376 to 553)                       | 374.2 (309.6 to 448.5)  |
|              | Female | 7 (7 to 8)          | 25.4 (22.4 to 29)   | 65 (57 to 74)          | 220.3 (194.8 to 250.6) | 5 (4 to 5)          | 15.4 (13.7 to 17.4) | 140 (123 to 160)          | 483.4 (425.2 to 553.2) | 5 (3 to 7)                         | 16.3 (11.3 to 22.8) | 144 (128 to 165)                       | 499.6 (440.1 to 571.4) | 33 (27 to 39)       | 55.2 (45.3 to 65.7)  | 281 (237 to 328)       | 472.9 (399.2 to 551.5) | 15 (12 to 17)       | 25 (20.7 to 29.7)   | 433 (356 to 524)          | 726 (599.8 to 874.6)   | 21 (14 to 30)                      | 35.6 (24.1 to 50)   | 454 (373 to 549)                       | 761.6 (627.2 to 915.7)  |
|              | Male   | 0 (0 to 0)          | 0.2 (0.1 to 0.2)    | 0 (0 to 0)             | 1 (0.8 to 1.3)         | 0 (0 to 0)          | 0.1 (0.1 to 0.2)    | 1 (1 to 1)                | 2.9 (2.2 to 3.8)       | 0 (0 to 0)                         | 0.1 (0.1 to 0.1)    | 1 (1 to 1)                             | 3 (2.3 to 4)           | 0 (0 to 0)          | 0.4 (0.3 to 0.5)     | 1 (1 to 2)             | 2.4 (1.8 to 3.1)       | 0 (0 to 0)          | 0.2 (0.2 to 0.3)    | 3 (2 to 4)                | 5.3 (4 to 7)           | 0 (0 to 0)                         | 0.3 (0.2 to 0.4)    | 3 (2 to 4)                             | 5.6 (4.2 to 7.3)        |
| Sierra Leone | Both   | 148 (106 to 196)    | 7.3 (5.3 to 9.6)    | 1003 (763 to 1284)     | 49 (37.7 to 62.2)      | 119 (86 to 157)     | 6.1 (4.5 to 7.9)    | 3654 (2565 to 4901)       | 170.7 (121.7 to 227.8) | 83 (52 to 124)                     | 4 (2.5 to 5.9)      | 3737 (2628 to 5025)                    | 174.8 (124.5 to 233)   | 502 (353 to 724)    | 12 (8.6 to 17.2)     | 3389 (2479 to 4695)    | 78.3 (58.3 to 107.8)   | 345 (247 to 497)    | 9 (6.6 to 12.9)     | 11178 (7727 to 16438)     | 247.7 (173.8 to 359.7) | 290 (174 to 450)                   | 6.7 (4.1 to 10.3)   | 11467 (7919 to 16837)                  | 254.4 (178.8 to 368.5)  |
|              | Female | 147 (105 to 194)    | 14.6 (10.6 to 19.2) | 996 (756 to 1276)      | 99 (76.3 to 125.4)     | 118 (85 to 155)     | 12.3 (9 to 16)      | 3624 (2543 to 4861)       | 342.7 (244.3 to 458)   | 82 (51 to 123)                     | 8.1 (5.1 to 12)     | 3706 (2603 to 4983)                    | 350.8 (250 to 468.7)   | 499 (351 to 721)    | 24 (17.1 to 34.7)    | 3372 (2464 to 4676)    | 157.9 (117.3 to 218.3) | 343 (244 to 494)    | 17.8 (12.9 to 25.7) | 11112 (7667 to 16364)     | 499.1 (348.9 to 728.1) | 288 (172 to 448)                   | 13.5 (8.3 to 20.7)  | 11400 (7855 to 16755)                  | 512.6 (358.5 to 743.4)  |
|              | Male   | 1 (1 to 2)          | 0.1 (0.1 to 0.2)    | 7 (5 to 10)            | 0.7 (0.4 to 0.9)       | 1 (1 to 2)          | 0.1 (0.1 to 0.2)    | 31 (20 to 45)             | 2.9 (1.9 to 4.3)       | 1 (0 to 1)                         | 0.1 (0 to 0.1)      | 32 (21 to 46)                          | 3 (2 to 4.4)           | 3 (2 to 4)          | 0.2 (0.1 to 0.2)     | 17 (12 to 24)          | 0.8 (0.5 to 1.1)       | 2 (2 to 3)          | 0.1 (0.1 to 0.2)    | 65 (43 to 96)             | 3.1 (2.1 to 4.7)       | 2 (1 to 3)                         | 0.1 (0.1 to 0.1)    | 67 (45 to 98)                          | 3.2 (2.1 to 4.8)        |
| Singapore    | Both   | 638 (588 to 694)    | 23.6 (21.8 to 25.6) | 6795 (6181 to 7522)    | 262.7 (237.9 to 291.5) | 205 (194 to 216)    | 8.4 (8 to 8.9)      | 6729 (6368 to 7109)       | 241.8 (229.3 to 254.8) | 489 (335 to 678)                   | 18.3 (12.6 to 25.4) | 7217 (6789 to 7631)                    | 260.1 (245.2 to 275.5) | 2524 (1994 to 3142) | 31 (24.5 to 38.5)    | 27184 (22591 to 32420) | 335.1 (279.5 to 398.9) | 515 (465 to 560)    | 6.5 (5.8 to 7.1)    | 13700 (12620 to 14887)    | 166.4 (153.2 to 180.6) | 1937 (1274 to 2830)                | 23.8 (15.7 to 34.8) | 15636 (14178 to 17350)                 | 190.2 (172.2 to 211.1)  |

|                 |        | 1990                   |                        |                           |                           |                        |                        |                           |                           |                                    |                        |                                        |                           | 2019                   |                          |                           |                            |                        |                        |                              |                              |                                    |                         |                                        |                              |
|-----------------|--------|------------------------|------------------------|---------------------------|---------------------------|------------------------|------------------------|---------------------------|---------------------------|------------------------------------|------------------------|----------------------------------------|---------------------------|------------------------|--------------------------|---------------------------|----------------------------|------------------------|------------------------|------------------------------|------------------------------|------------------------------------|-------------------------|----------------------------------------|------------------------------|
|                 |        | Incidence              |                        | Prevalence                |                           | Deaths                 |                        | YLLs (Years of Life Lost) |                           | YLDs (Years Lived with Disability) |                        | DALYs (Disability-Adjusted Life Years) |                           | Incidence              |                          | Prevalence                |                            | Deaths                 |                        | YLLs (Years of Life Lost)    |                              | YLDs (Years Lived with Disability) |                         | DALYs (Disability-Adjusted Life Years) |                              |
| Location        | Sex    | Number                 | Rate                   | Number                    | Rate                      | Number                 | Rate                   | Number                    | Rate                      | Number                             | Rate                   | Number                                 | Rate                      | Number                 | Rate                     | Number                    | Rate                       | Number                 | Rate                   | Number                       | Rate                         | Number                             | Rate                    | Number                                 | Rate                         |
|                 | Female | 636<br>(586 to 691)    | 44.7<br>(41.2 to 48.7) | 6772<br>(6160 to 7500)    | 493.8<br>(447.3 to 548.6) | 204<br>(193 to 215)    | 15.5<br>(14.6 to 16.4) | 6695<br>(6337 to 7077)    | 460.2<br>(435.9 to 485.9) | 487<br>(333 to 675)                | 34.5<br>(23.8 to 48)   | 7182<br>(6756 to 7594)                 | 494.8<br>(465.9 to 523.9) | 2516<br>(1986 to 3132) | 62.7<br>(49.6 to 78.1)   | 27102<br>(22515 to 32327) | 674.3<br>(558.3 to 807.1)  | 512<br>(462 to 557)    | 12.7<br>(11.4 to 13.8) | 13637<br>(12562 to 14821)    | 338.7<br>(312.8 to 368)      | 1930<br>(1268 to 2819)             | 48.1<br>(31.6 to 70.6)  | 15567<br>(14118 to 17283)              | 386.9<br>(351.2 to 429.7)    |
|                 | Male   | 2 (2 to 3)             | 0.2 (0.2 to 0.3)       | 23 (19 to 27)             | 2.1 (1.8 to 2.5)          | 1 (1 to 1)             | 0.1 (0.1 to 0.2)       | 33 (29 to 38)             | 3 (2.7 to 3.5)            | 2 (1 to 3)                         | 0.2 (0.1 to 0.3)       | 35 (31 to 40)                          | 3.2 (2.8 to 3.7)          | 8 (6 to 11)            | 0.2 (0.2 to 0.3)         | 82 (62 to 107)            | 2.3 (1.7 to 2.9)           | 3 (2 to 3)             | 0.1 (0.1 to 0.1)       | 63 (52 to 76)                | 1.7 (1.4 to 2)               | 7 (4 to 11)                        | 0.2 (0.1 to 0.3)        | 70 (58 to 84)                          | 1.9 (1.6 to 2.3)             |
| Slovakia        | Both   | 1467<br>(1369 to 1575) | 25.3<br>(23.6 to 27.2) | 14109<br>(12917 to 15591) | 241.6<br>(221.3 to 266.4) | 685<br>(643 to 728)    | 11.8<br>(11.1 to 12.5) | 18922<br>(17742 to 20141) | 327.1<br>(306.2 to 347.9) | 1004<br>(709 to 1357)              | 17.2<br>(12.2 to 23.4) | 19926<br>(18652 to 21261)              | 344.3<br>(321.6 to 367.3) | 2901<br>(2161 to 3825) | 33.4<br>(24.7 to 44.1)   | 27135<br>(21299 to 34222) | 310.1<br>(241.8 to 392.5)  | 974<br>(733 to 1258)   | 10.9<br>(8.2 to 14)    | 22053<br>(16458 to 29161)    | 255.7<br>(190.7 to 338.3)    | 1977<br>(1311 to 2899)             | 22.7<br>(15.2 to 33.3)  | 24030<br>(17935 to 31778)              | 278.4<br>(207.6 to 368.5)    |
|                 | Female | 1451<br>(1353 to 1560) | 45.5<br>(42.4 to 49.1) | 13976<br>(12800 to 15446) | 433.2<br>(396.8 to 474.9) | 677<br>(635 to 720)    | 20.7<br>(19.4 to 22)   | 18730<br>(17548 to 19937) | 596.9<br>(557.6 to 635.8) | 991<br>(700 to 1342)               | 30.9<br>(21.7 to 42)   | 19721<br>(18444 to 21071)              | 627.8<br>(586.1 to 670.1) | 2872<br>(2133 to 3785) | 60.6<br>(44.4 to 80.3)   | 26885<br>(21114 to 33951) | 564.1<br>(436.3 to 721.1)  | 963<br>(727 to 1246)   | 18.7<br>(14.1 to 24.4) | 21814<br>(16274 to 28858)    | 468.7<br>(349.2 to 623.3)    | 1954<br>(1295 to 2874)             | 41.3<br>(27.2 to 60.4)  | 23769<br>(17741 to 31414)              | 509.9<br>(379.2 to 677.9)    |
|                 | Male   | 17 (14 to 20)          | 0.7 (0.6 to 0.8)       | 133 (110 to 159)          | 5.3 (4.4 to 6.3)          | 8 (7 to 10)            | 0.4 (0.3 to 0.4)       | 193 (162 to 226)          | 7.6 (6.5 to 9)            | 13 (9 to 18)                       | 0.5 (0.3 to 0.7)       | 205 (174 to 242)                       | 8.1 (6.9 to 9.6)          | 29 (20 to 43)          | 0.8 (0.5 to 1.1)         | 250 (178 to 350)          | 6.6 (4.8 to 9.1)           | 11 (7 to 15)           | 0.3 (0.2 to 0.4)       | 238 (162 to 338)             | 6.3 (4.3 to 8.8)             | 23 (14 to 36)                      | 0.6 (0.4 to 1)          | 261 (180 to 368)                       | 6.9 (4.8 to 9.6)             |
| Slovenia        | Both   | 870<br>(644 to 1129)   | 36.4<br>(27.1 to 47.3) | 8169<br>(6399 to 10293)   | 340.8<br>(266.4 to 429.8) | 361<br>(277 to 463)    | 15 (11.6 to 19.3)      | 9204<br>(6904 to 12102)   | 384.3<br>(288.2 to 505.2) | 583<br>(376 to 846)                | 24.4<br>(15.8 to 35.4) | 9787<br>(7375 to 12831)                | 408.7<br>(307.7 to 537.4) | 1233<br>(947 to 1638)  | 33.7<br>(25.7 to 45.1)   | 12643<br>(10341 to 15704) | 340.3<br>(275.4 to 430)    | 438<br>(339 to 570)    | 10 (7.8 to 13.1)       | 8482<br>(6532 to 11227)      | 224.9<br>(172.6 to 300.4)    | 857<br>(550 to 1240)               | 23.5<br>(15.1 to 34.4)  | 9338<br>(7225 to 12238)                | 248.4<br>(191.7 to 328.1)    |
|                 | Female | 862<br>(638 to 1120)   | 65.4<br>(48.1 to 85.4) | 8104<br>(6347 to 10218)   | 609.4<br>(472.9 to 775.3) | 357<br>(274 to 459)    | 25.4<br>(19.4 to 32.9) | 9127<br>(6844 to 12017)   | 690.9<br>(515.8 to 914.2) | 577<br>(372 to 839)                | 43.9<br>(28.2 to 64.1) | 9704<br>(7313 to 12731)                | 734.8<br>(549.5 to 974.9) | 1217<br>(933 to 1619)  | 64.7<br>(49.4 to 86.8)   | 12504<br>(10230 to 15522) | 653.2<br>(524.9 to 830.4)  | 433<br>(335 to 562)    | 17.7<br>(13.7 to 23.3) | 8381<br>(6458 to 11106)      | 427.3<br>(326.9 to 573.1)    | 844<br>(543 to 1221)               | 45.2<br>(28.9 to 66.7)  | 9226<br>(7134 to 12098)                | 472.6<br>(363.6 to 627.6)    |
|                 | Male   | 8 (6 to 11)            | 0.9 (0.6 to 1.1)       | 64 (49 to 84)             | 6.6 (5 to 8.5)            | 4 (3 to 5)             | 0.4 (0.3 to 0.6)       | 77 (58 to 103)            | 8.1 (6.1 to 10.7)         | 6 (4 to 9)                         | 0.6 (0.4 to 0.9)       | 83 (62 to 111)                         | 8.7 (6.5 to 11.5)         | 16 (11 to 22)          | 0.9 (0.6 to 1.2)         | 139 (101 to 185)          | 7.8 (5.7 to 10.2)          | 5 (4 to 7)             | 0.3 (0.2 to 0.4)       | 100 (70 to 137)              | 5.7 (4.1 to 7.8)             | 12 (8 to 19)                       | 0.7 (0.4 to 1.1)        | 112 (80 to 152)                        | 6.4 (4.6 to 8.6)             |
| Solomon Islands | Both   | 18 (11 to 25)          | 10.2<br>(6.3 to 14.1)  | 146<br>(105 to 188)       | 88.6<br>(65.3 to 112.6)   | 12 (7 to 17)           | 7.4 (4.6 to 10.3)      | 433<br>(272 to 605)       | 238.3<br>(149.8 to 331.1) | 11 (7 to 17)                       | 6.4 (3.9 to 9.8)       | 444<br>(279 to 620)                    | 244.7<br>(154.3 to 339)   | 281<br>(215 to 363)    | 62.6<br>(48.3 to 80.3)   | 2039<br>(1583 to 2626)    | 449.1<br>(355 to 567.8)    | 153<br>(117 to 196)    | 37.1<br>(29.2 to 46.8) | 5910<br>(4483 to 7689)       | 1269.5<br>(976.3 to 1629.7)  | 169<br>(107 to 245)                | 36.9<br>(24.1 to 52.9)  | 6079<br>(4597 to 7916)                 | 1306.5<br>(1004.8 to 1673.3) |
|                 | Female | 17 (11 to 24)          | 22.1<br>(13.4 to 30.6) | 145<br>(103 to 187)       | 194.5<br>(143.6 to 247.1) | 12 (7 to 17)           | 16.3<br>(9.8 to 22.7)  | 427<br>(268 to 599)       | 512<br>(317.9 to 710.9)   | 11 (6 to 17)                       | 14 (8.3 to 21.3)       | 438<br>(275 to 614)                    | 526<br>(326 to 731.3)     | 280<br>(214 to 362)    | 126.5<br>(97.5 to 162.4) | 2034<br>(1579 to 2619)    | 907.3<br>(717.2 to 1146.7) | 152<br>(117 to 195)    | 75 (59 to 94.5)        | 5893<br>(4463 to 7672)       | 2561.3<br>(1967.3 to 3291.1) | 168<br>(107 to 244)                | 74.5<br>(48.8 to 106.8) | 6061<br>(4579 to 7893)                 | 2635.7<br>(2026.6 to 3377.1) |
|                 | Male   | 0 (0 to 0)             | 0.3 (0.2 to 0.5)       | 1 (1 to 3)                | 1.9 (1.2 to 3)            | 0 (0 to 0)             | 0.3 (0.1 to 0.5)       | 6 (3 to 11)               | 6.4 (3.6 to 12)           | 0 (0 to 0)                         | 0.2 (0.1 to 0.3)       | 6 (3 to 11)                            | 6.6 (3.7 to 12.3)         | 1 (0 to 1)             | 0.5 (0.3 to 0.9)         | 5 (3 to 9)                | 2.9 (1.8 to 4.9)           | 1 (0 to 1)             | 0.4 (0.2 to 0.7)       | 17 (9 to 32)                 | 9.3 (4.9 to 17)              | 1 (0 to 1)                         | 0.3 (0.1 to 0.6)        | 18 (9 to 33)                           | 9.6 (5 to 17.5)              |
| Somalia         | Both   | 257<br>(177 to 373)    | 8.4 (5.9 to 12.1)      | 1609<br>(1168 to 2213)    | 51.1 (39 to 67.5)         | 212<br>(147 to 305)    | 7.5 (5.3 to 10.7)      | 7329<br>(4956 to 10756)   | 208.8<br>(145.6 to 301.5) | 142 (84 to 225)                    | 4.5 (2.7 to 6.9)       | 7471<br>(5051 to 10940)                | 213.3<br>(149 to 307.5)   | 701<br>(428 to 1102)   | 9.3 (5.7 to 14.6)        | 4501<br>(3002 to 6688)    | 57.1<br>(40.2 to 82)       | 571<br>(355 to 889)    | 8.3 (5.2 to 12.9)      | 19022<br>(11923 to 29517)    | 219.6<br>(135.6 to 343.6)    | 390<br>(221 to 669)                | 5 (2.9 to 8.3)          | 19412<br>(12170 to 30091)              | 224.5<br>(138.8 to 351.5)    |
|                 | Female | 233<br>(154 to 341)    | 13.7<br>(9.3 to 20.3)  | 1494<br>(1079 to 2103)    | 87.7<br>(65.7 to 118.6)   | 188<br>(126 to 274)    | 12 (8.2 to 17.5)       | 6727<br>(4414 to 10106)   | 354<br>(237.8 to 518.6)   | 129 (76 to 208)                    | 7.4 (4.4 to 11.7)      | 6856<br>(4519 to 10290)                | 361.5<br>(243 to 529.6)   | 651<br>(393 to 1033)   | 14.9 (9 to 23.9)         | 4244<br>(2796 to 6355)    | 94.5<br>(64.4 to 138.3)    | 524<br>(325 to 831)    | 12.9 (8 to 20.6)       | 17789<br>(11016 to 27970)    | 367<br>(227 to 580.4)        | 362<br>(199 to 632)                | 8 (4.5 to 13.7)         | 18152<br>(11275 to 28563)              | 375.1<br>(232.4 to 592.3)    |
|                 | Male   | 25 (15 to 39)          | 2.6 (1.6 to 4.1)       | 115 (75 to 179)           | 10.7<br>(7.4 to 15.9)     | 23 (15 to 37)          | 2.7 (1.6 to 4.1)       | 602<br>(363 to 974)       | 52.9<br>(33.3 to 83.3)    | 13 (7 to 22)                       | 1.3 (0.7 to 2.1)       | 616<br>(371 to 994)                    | 54.2<br>(34.1 to 85.3)    | 51 (29 to 82)          | 2.3 (1.4 to 3.7)         | 257<br>(158 to 396)       | 10.2<br>(6.8 to 15.2)      | 46 (27 to 75)          | 2.3 (1.4 to 3.7)       | 1232<br>(701 to 1988)        | 45 (27.2 to 72.7)            | 28 (14 to 48)                      | 1.1 (0.6 to 2)          | 1261<br>(715 to 2027)                  | 46.2<br>(27.8 to 74.4)       |
| South Africa    | Both   | 3503<br>(3121 to 3969) | 15.1<br>(13.3 to 17.5) | 26395<br>(23712 to 29311) | 112.7<br>(100.2 to 127)   | 2370<br>(2078 to 2744) | 11.1<br>(9.6 to 13.1)  | 73519<br>(65651 to 81830) | 298.1<br>(263.4 to 338.7) | 2087<br>(1480 to 2836)             | 8.8 (6.2 to 12.1)      | 75606<br>(67462 to 84203)              | 306.9<br>(270.6 to 348.4) | 8682<br>(7506 to 9966) | 18.7<br>(16.4 to 21.3)   | 66279<br>(58405 to 74873) | 138.5<br>(122.9 to 156.3)  | 5309<br>(4671 to 6033) | 12.4<br>(11.1 to 14)   | 142083<br>(123201 to 163575) | 292.4<br>(254.9 to 334.9)    | 5170<br>(3610 to 7084)             | 10.8<br>(7.6 to 14.7)   | 147253<br>(128115 to 169348)           | 303.2<br>(264.9 to 347.3)    |

|             |        | 1990                   |                        |                           |                           |                        |                        |                           |                           |                                    |                     |                                        | 2019                      |                        |                      |                           |                           |                        |                        |                              |                           |                                    |                        |                                        |                           |
|-------------|--------|------------------------|------------------------|---------------------------|---------------------------|------------------------|------------------------|---------------------------|---------------------------|------------------------------------|---------------------|----------------------------------------|---------------------------|------------------------|----------------------|---------------------------|---------------------------|------------------------|------------------------|------------------------------|---------------------------|------------------------------------|------------------------|----------------------------------------|---------------------------|
|             |        | Incidence              |                        | Prevalence                |                           | Deaths                 |                        | YLLs (Years of Life Lost) |                           | YLDs (Years Lived with Disability) |                     | DALYs (Disability-Adjusted Life Years) |                           | Incidence              |                      | Prevalence                |                           | Deaths                 |                        | YLLs (Years of Life Lost)    |                           | YLDs (Years Lived with Disability) |                        | DALYs (Disability-Adjusted Life Years) |                           |
| Location    | Sex    | Number                 | Rate                   | Number                    | Rate                      | Number                 | Rate                   | Number                    | Rate                      | Number                             | Rate                | Number                                 | Rate                      | Number                 | Rate                 | Number                    | Rate                      | Number                 | Rate                   | Number                       | Rate                      | Number                             | Rate                   | Number                                 | Rate                      |
|             | Female | 3439<br>(3063 to 3901) | 26.5<br>(23.4 to 30.4) | 25965<br>(23315 to 28830) | 198.8<br>(176.9 to 223.2) | 2321<br>(2031 to 2688) | 18.8<br>(16.3 to 22.1) | 72103<br>(64341 to 80331) | 532.9<br>(471.4 to 601.8) | 2045<br>(1449 to 2774)             | 15.5 (11 to 21.2)   | 74148<br>(66121 to 82726)              | 548.4<br>(484.3 to 619.5) | 8540<br>(7370 to 9820) | 32.1<br>(27.8 to 37) | 65305<br>(57470 to 73827) | 241.6<br>(212.9 to 272.6) | 5209<br>(4576 to 5915) | 20.5<br>(18.1 to 23.2) | 139381<br>(120671 to 160760) | 511.1<br>(442.7 to 587.9) | 5074<br>(3536 to 6957)             | 18.8<br>(13.1 to 25.7) | 144455<br>(125484 to 166351)           | 529.9<br>(461.8 to 609.3) |
|             | Male   | 63 (53 to 81)          | 0.7 (0.6 to 0.9)       | 430 (362 to 523)          | 4.5 (3.8 to 5.6)          | 49 (40 to 64)          | 0.6 (0.5 to 0.8)       | 1416 (1195 to 1744)       | 13.6 (11.3 to 17.5)       | 42 (29 to 61)                      | 0.4 (0.3 to 0.7)    | 1458 (1232 to 1793)                    | 14.1 (11.7 to 18.1)       | 142 (120 to 169)       | 0.8 (0.7 to 0.9)     | 974 (839 to 1135)         | 4.9 (4.3 to 5.8)          | 100 (86 to 120)        | 0.6 (0.5 to 0.7)       | 2702 (2302 to 3226)          | 13.1 (11.2 to 15.6)       | 96 (66 to 137)                     | 0.5 (0.3 to 0.7)       | 2799 (2385 to 3328)                    | 13.6 (11.7 to 16.2)       |
| South Sudan | Both   | 195 (143 to 254)       | 7.7 (5.8 to 9.9)       | 1239 (957 to 1577)        | 46.9 (36.9 to 58.4)       | 164 (122 to 211)       | 6.9 (5.1 to 8.7)       | 4975 (3523 to 6618)       | 177.6 (129.8 to 232.5)    | 107 (69 to 155)                    | 4 (2.7 to 5.8)      | 5082 (3599 to 6744)                    | 181.6 (132.7 to 237.7)    | 380 (252 to 539)       | 8.6 (6 to 11.9)      | 2499 (1768 to 3435)       | 53.9 (39.7 to 71.8)       | 291 (192 to 416)       | 7.3 (5 to 10)          | 9262 (5849 to 13765)         | 188.3 (122.5 to 271.5)    | 212 (125 to 332)                   | 4.6 (2.8 to 7.1)       | 9474 (6002 to 14071)                   | 192.9 (126.3 to 277.8)    |
|             | Female | 171 (125 to 227)       | 14.6 (10.9 to 19)      | 1129 (876 to 1442)        | 95 (74.4 to 118.9)        | 140 (104 to 183)       | 12.6 (9.4 to 16.3)     | 4454 (3199 to 5939)       | 351.6 (256.5 to 467)      | 94 (60 to 137)                     | 7.8 (5.1 to 11.4)   | 4548 (3268 to 6069)                    | 359.5 (261.5 to 477.7)    | 349 (227 to 496)       | 15.9 (10.8 to 22.1)  | 2349 (1657 to 3239)       | 103 (76.3 to 136.8)       | 262 (169 to 375)       | 13.1 (8.9 to 18.1)     | 8623 (5353 to 12735)         | 349.9 (224.3 to 500.3)    | 195 (114 to 310)                   | 8.5 (5.2 to 13.1)      | 8819 (5494 to 13011)                   | 358.5 (229.7 to 513.4)    |
|             | Male   | 24 (13 to 39)          | 2.1 (1.2 to 3.4)       | 110 (66 to 170)           | 8.9 (5.8 to 13.4)         | 23 (13 to 37)          | 2.2 (1.2 to 3.5)       | 521 (290 to 851)          | 41.3 (23.4 to 65.7)       | 13 (7 to 21)                       | 1.1 (0.6 to 1.7)    | 534 (297 to 870)                       | 42.3 (24 to 67.2)         | 31 (16 to 53)          | 1.8 (1 to 3.1)       | 151 (86 to 243)           | 8.2 (4.9 to 13.1)         | 29 (16 to 49)          | 1.9 (1 to 3.1)         | 639 (328 to 1101)            | 33.5 (18 to 57.6)         | 17 (8 to 30)                       | 0.9 (0.5 to 1.6)       | 655 (337 to 1127)                      | 34.4 (18.5 to 59.1)       |
| Spain       | Both   | 17091 (16196 to 17938) | 35.2 (33.3 to 36.9)    | 196217 (177960 to 219643) | 391.1 (359.1 to 434)      | 6524 (6128 to 6798)    | 12.9 (12.1 to 13.4)    | 167792 (161143 to 173551) | 351.5 (338.3 to 363.4)    | 13253 (9169 to 18346)              | 26.9 (18.7 to 37.2) | 181045 (173298 to 188883)              | 378.4 (362.4 to 394.3)    | 29815 (23127 to 38294) | 37 (28.5 to 47.8)    | 335529 (280250 to 406999) | 408.6 (337.1 to 501.7)    | 8075 (7100 to 8851)    | 8.4 (7.6 to 9.1)       | 163798 (150241 to 175267)    | 205.3 (190 to 219.3)      | 22934 (14901 to 33244)             | 28.4 (18.2 to 41.7)    | 186731 (169266 to 204238)              | 233.7 (213.4 to 255.8)    |
|             | Female | 16962 (16058 to 17819) | 65.4 (61.9 to 68.7)    | 194924 (176969 to 218183) | 718.1 (660.1 to 792.2)    | 6483 (6089 to 6754)    | 23.1 (21.9 to 24)      | 166851 (160160 to 172612) | 661.7 (638.4 to 683.6)    | 13141 (9091 to 18201)              | 49.9 (34.3 to 68.9) | 179992 (172219 to 187811)              | 711.6 (682.7 to 741.5)    | 29411 (22819 to 37841) | 69.9 (53.6 to 90.5)  | 331702 (277321 to 402072) | 771.4 (632.8 to 948.3)    | 7981 (7002 to 8763)    | 15.2 (13.8 to 16.3)    | 161975 (148544 to 173454)    | 390.1 (361 to 417.6)      | 22594 (14715 to 32790)             | 53.7 (34.3 to 78.9)    | 184569 (167164 to 202058)              | 443.8 (405.1 to 484.9)    |
|             | Male   | 129 (106 to 157)       | 0.5 (0.5 to 0.7)       | 1293 (1095 to 1555)       | 5.6 (4.8 to 6.6)          | 41 (36 to 46)          | 0.2 (0.2 to 0.2)       | 942 (838 to 1057)         | 4 (3.6 to 4.5)            | 112 (74 to 162)                    | 0.5 (0.3 to 0.7)    | 1053 (935 to 1190)                     | 4.5 (4 to 5.1)            | 404 (287 to 550)       | 1 (0.7 to 1.4)       | 3827 (2932 to 4979)       | 9.6 (7.4 to 12.7)         | 94 (77 to 114)         | 0.2 (0.2 to 0.3)       | 1822 (1526 to 2148)          | 4.7 (4 to 5.5)            | 340 (214 to 519)                   | 0.9 (0.5 to 1.3)       | 2162 (1780 to 2615)                    | 5.6 (4.6 to 6.7)          |
| Sri Lanka   | Both   | 967 (836 to 1102)      | 7.6 (6.6 to 8.7)       | 8767 (7714 to 9887)       | 69.6 (61.1 to 78.5)       | 554 (481 to 629)       | 4.8 (4.2 to 5.5)       | 18247 (15827 to 20820)    | 138.5 (120.3 to 157.8)    | 641 (440 to 890)                   | 5 (3.4 to 6.9)      | 18888 (16392 to 21562)                 | 143.5 (124.7 to 163.4)    | 4168 (3060 to 5609)    | 16.3 (12 to 21.9)    | 36770 (28384 to 47681)    | 142.1 (110.1 to 184.1)    | 1692 (1248 to 2246)    | 6.9 (5.1 to 9.1)       | 45872 (33445 to 61242)       | 177.8 (130 to 238.1)      | 2713 (1753 to 4071)                | 10.5 (6.7 to 15.8)     | 48585 (35693 to 65099)                 | 188.3 (138.1 to 251.9)    |
|             | Female | 956 (825 to 1091)      | 15.1 (13.1 to 17.2)    | 8697 (7640 to 9809)       | 138.4 (121.4 to 156.4)    | 546 (474 to 621)       | 9.5 (8.2 to 10.8)      | 18024 (15624 to 20583)    | 274.2 (238.2 to 312.9)    | 634 (434 to 879)                   | 9.9 (6.8 to 13.6)   | 18658 (16156 to 21312)                 | 284.1 (246.4 to 324.3)    | 4124 (3028 to 5557)    | 29.8 (21.9 to 40)    | 36463 (28145 to 47379)    | 261.1 (201.4 to 339.8)    | 1670 (1233 to 2222)    | 12.1 (9 to 16.1)       | 45298 (33070 to 60458)       | 325.7 (238.1 to 436.2)    | 2682 (1728 to 4030)                | 19.3 (12.4 to 29.1)    | 47980 (35214 to 64550)                 | 345 (252.2 to 463.1)      |
|             | Male   | 11 (9 to 14)           | 0.2 (0.1 to 0.3)       | 70 (53 to 90)             | 1.2 (0.9 to 1.5)          | 8 (6 to 10)            | 0.1 (0.1 to 0.2)       | 223 (173 to 282)          | 3.6 (2.8 to 4.6)          | 7 (5 to 11)                        | 0.1 (0.1 to 0.2)    | 230 (179 to 292)                       | 3.7 (2.9 to 4.8)          | 44 (27 to 67)          | 0.4 (0.2 to 0.6)     | 308 (194 to 475)          | 2.6 (1.6 to 3.9)          | 22 (14 to 33)          | 0.2 (0.1 to 0.3)       | 573 (360 to 864)             | 4.8 (3.1 to 7.2)          | 31 (17 to 53)                      | 0.3 (0.1 to 0.4)       | 605 (377 to 909)                       | 5.1 (3.2 to 7.6)          |
| Sudan       | Both   | 756 (547 to 1054)      | 7 (5 to 9.8)           | 6228 (4885 to 8054)       | 59.3 (47.1 to 76)         | 524 (379 to 729)       | 5.1 (3.7 to 7.3)       | 18345 (13338 to 25518)    | 162 (117.4 to 225.2)      | 473 (302 to 748)                   | 4.4 (2.8 to 6.9)    | 18818 (13734 to 26054)                 | 166.3 (120.8 to 231.4)    | 2902 (1865 to 4062)    | 11.8 (8 to 16.2)     | 23436 (16080 to 32066)    | 95.5 (69 to 126.3)        | 1414 (970 to 1954)     | 6.4 (4.6 to 8.6)       | 49994 (31708 to 72122)       | 197.3 (132.3 to 275.8)    | 1839 (1004 to 2875)                | 7.4 (4.3 to 11.3)      | 51833 (33183 to 74982)                 | 204.7 (138.1 to 285.6)    |
|             | Female | 730 (522 to 1021)      | 13.7 (9.7 to 19.5)     | 6071 (4715 to 7936)       | 118.7 (93.8 to 153.7)     | 501 (358 to 706)       | 9.9 (7 to 14.4)        | 17734 (12723 to 24697)    | 318.5 (228.7 to 446.8)    | 457 (293 to 732)                   | 8.6 (5.6 to 13.8)   | 18190 (13030 to 25216)                 | 327.1 (234.7 to 460)      | 2846 (1827 to 4005)    | 24 (16.2 to 33)      | 23052 (15851 to 31616)    | 196.4 (143.4 to 259.2)    | 1375 (931 to 1914)     | 13.1 (9.4 to 17.7)     | 48936 (31076 to 70606)       | 401.4 (270.6 to 559.8)    | 1802 (980 to 2825)                 | 15 (8.8 to 22.9)       | 50738 (32468 to 73398)                 | 416.4 (282.4 to 577.1)    |
|             | Male   | 27 (14 to 44)          | 0.6 (0.3 to 0.9)       | 157 (96 to 244)           | 3.2 (2 to 4.8)            | 23 (12 to 38)          | 0.5 (0.3 to 0.9)       | 611 (321 to 1024)         | 11.9 (6.3 to 19.6)        | 16 (8 to 28)                       | 0.3 (0.2 to 0.6)    | 628 (331 to 1050)                      | 12.2 (6.5 to 20.2)        | 56 (32 to 91)          | 0.5 (0.3 to 0.9)     | 384 (239 to 587)          | 3.6 (2.3 to 5.4)          | 39 (23 to 61)          | 0.4 (0.2 to 0.6)       | 1058 (612 to 1685)           | 9.4 (5.5 to 14.8)         | 38 (20 to 63)                      | 0.4 (0.2 to 0.6)       | 1096 (638 to 1741)                     | 9.8 (5.7 to 15.4)         |
| Suriname    | Both   | 41 (35 to 47)          | 14.6 (12.6 to 16.7)    | 318 (275 to 367)          | 114.1 (98.9 to 130.8)     | 23 (20 to 27)          | 8.8 (7.7 to 9.9)       | 694 (592 to 801)          | 242.4 (209.3 to 279.3)    | 24 (16 to 33)                      | 8.4 (5.6 to 11.7)   | 718 (612 to 830)                       | 250.9 (217 to 288.7)      | 131 (104 to 162)       | 21.2 (16.9 to 25.8)  | 1015 (816 to 1239)        | 162.6 (131.8 to 197.1)    | 63 (51 to 77)          | 10.5 (8.5 to 12.7)     | 1789 (1424 to 2222)          | 285.1 (227.3 to 350.4)    | 75 (52 to 104)                     | 12.1 (8.3 to 16.6)     | 1864 (1481 to 2316)                    | 297.2 (237.5 to 365.4)    |

|                            |        | 1990                |                       |                        |                          |                     |                     |                           |                        |                                    |                     |                                        |                         | 2019                 |                      |                         |                         |                     |                     |                           |                        |                                    |                     |                                        |                        |
|----------------------------|--------|---------------------|-----------------------|------------------------|--------------------------|---------------------|---------------------|---------------------------|------------------------|------------------------------------|---------------------|----------------------------------------|-------------------------|----------------------|----------------------|-------------------------|-------------------------|---------------------|---------------------|---------------------------|------------------------|------------------------------------|---------------------|----------------------------------------|------------------------|
|                            |        | Incidence           |                       | Prevalence             |                          | Deaths              |                     | YLLs (Years of Life Lost) |                        | YLDs (Years Lived with Disability) |                     | DALYs (Disability-Adjusted Life Years) |                         | Incidence            |                      | Prevalence              |                         | Deaths              |                     | YLLs (Years of Life Lost) |                        | YLDs (Years Lived with Disability) |                     | DALYs (Disability-Adjusted Life Years) |                        |
| Location                   | Sex    | Number              | Rate                  | Number                 | Rate                     | Number              | Rate                | Number                    | Rate                   | Number                             | Rate                | Number                                 | Rate                    | Number               | Rate                 | Number                  | Rate                    | Number              | Rate                | Number                    | Rate                   | Number                             | Rate                | Number                                 | Rate                   |
|                            | Female | 40 (34 to 46)       | 27.7 (23.9 to 31.8)   | 314 (271 to 362)       | 218.2 (188.6 to 250.8)   | 23 (20 to 26)       | 16.3 (14.2 to 18.5) | 680 (579 to 787)          | 461.4 (397.3 to 532)   | 23 (15 to 32)                      | 16 (10.6 to 22.3)   | 703 (599 to 816)                       | 477.4 (411.9 to 551)    | 129 (102 to 159)     | 39.5 (31.4 to 48.4)  | 1003 (807 to 1224)      | 305.7 (247 to 372.8)    | 62 (50 to 75)       | 19 (15.4 to 23)     | 1755 (1391 to 2175)       | 534.3 (424.5 to 657.5) | 74 (51 to 102)                     | 22.5 (15.5 to 31.2) | 1829 (1448 to 2267)                    | 556.8 (443 to 686.7)   |
|                            | Male   | 1 (1 to 1)          | 0.6 (0.5 to 0.7)      | 4 (3 to 5)             | 3.1 (2.6 to 3.8)         | 1 (0 to 1)          | 0.5 (0.4 to 0.6)    | 14 (11 to 17)             | 10.8 (8.8 to 13)       | 0 (0 to 1)                         | 0.3 (0.2 to 0.5)    | 14 (12 to 17)                          | 11.1 (9.1 to 13.4)      | 2 (1 to 3)           | 0.7 (0.5 to 1)       | 12 (9 to 17)            | 4.3 (3.1 to 5.8)        | 1 (1 to 2)          | 0.6 (0.4 to 0.8)    | 35 (25 to 48)             | 12.1 (8.6 to 16.5)     | 1 (1 to 2)                         | 0.4 (0.3 to 0.7)    | 36 (25 to 49)                          | 12.5 (8.9 to 17.1)     |
| Sweden                     | Both   | 5134 (4812 to 5452) | 40.5 (38 to 43.1)     | 58792 (52990 to 65807) | 445.6 (407.3 to 492)     | 1663 (1553 to 1741) | 12 (11.3 to 12.5)   | 38110 (36472 to 39490)    | 311.4 (299.2 to 322)   | 4011 (2756 to 5498)                | 31.1 (21.4 to 42.7) | 42121 (39948 to 44128)                 | 342.5 (326.7 to 358.2)  | 7320 (5846 to 9046)  | 42.2 (33.4 to 52.4)  | 83446 (70285 to 98575)  | 464.2 (386.3 to 549.9)  | 1947 (1724 to 2110) | 9.4 (8.6 to 10.2)   | 37205 (34370 to 39910)    | 217.7 (203.1 to 232.3) | 5694 (3781 to 8194)                | 32.5 (21.3 to 47.1) | 42899 (39125 to 46568)                 | 250.3 (229.8 to 270.6) |
|                            | Female | 5110 (4787 to 5429) | 77.1 (72.5 to 82.3)   | 58534 (52776 to 65510) | 839 (769 to 924.1)       | 1654 (1544 to 1732) | 21.9 (20.8 to 22.8) | 37909 (36285 to 39282)    | 598 (575.3 to 618.2)   | 3990 (2742 to 5471)                | 59 (40.4 to 81)     | 41899 (39733 to 43906)                 | 657 (626.9 to 687.3)    | 7279 (5807 to 9006)  | 82.5 (65.4 to 102.7) | 82999 (69913 to 98024)  | 905.1 (751.7 to 1071.4) | 1934 (1712 to 2098) | 17.8 (16.2 to 19.1) | 36961 (34136 to 39669)    | 425.9 (398.1 to 454.2) | 5657 (3754 to 8150)                | 63.5 (41.4 to 92.1) | 42618 (38855 to 46295)                 | 489.5 (449.7 to 529.4) |
|                            | Male   | 24 (20 to 28)       | 0.4 (0.3 to 0.4)      | 257 (217 to 304)       | 4.1 (3.5 to 4.8)         | 9 (8 to 11)         | 0.1 (0.1 to 0.2)    | 200 (177 to 224)          | 3.4 (3 to 3.7)         | 22 (14 to 30)                      | 0.3 (0.2 to 0.5)    | 222 (196 to 250)                       | 3.7 (3.3 to 4.1)        | 41 (31 to 53)        | 0.5 (0.4 to 0.6)     | 446 (359 to 547)        | 5 (4 to 6.1)            | 12 (10 to 14)       | 0.1 (0.1 to 0.1)    | 244 (210 to 280)          | 2.9 (2.6 to 3.4)       | 37 (25 to 54)                      | 0.4 (0.3 to 0.6)    | 281 (240 to 325)                       | 3.4 (2.9 to 3.9)       |
| Switzerland                | Both   | 5155 (4819 to 5478) | 54.1 (50.6 to 57.6)   | 53203 (48556 to 58424) | 552.4 (505.7 to 601.5)   | 1953 (1822 to 2044) | 19.4 (18.2 to 20.2) | 44576 (42589 to 46323)    | 477.8 (457 to 496.2)   | 3780 (2618 to 5150)                | 39.6 (27.5 to 53.9) | 48355 (46004 to 50671)                 | 517.3 (492.9 to 541.1)  | 6160 (4734 to 7936)  | 40.2 (30.7 to 52.1)  | 70274 (59193 to 83949)  | 449.1 (373.3 to 545)    | 1697 (1472 to 1859) | 9.6 (8.5 to 10.5)   | 33018 (29714 to 35684)    | 218.2 (199.6 to 235.1) | 4756 (3077 to 6851)                | 30.9 (19.8 to 45.4) | 37774 (33790 to 41646)                 | 249.1 (224.8 to 275)   |
|                            | Female | 5131 (4795 to 5451) | 100.1 (93.6 to 106.5) | 52982 (48344 to 58223) | 1016.2 (933.6 to 1102.9) | 1944 (1813 to 2034) | 34.1 (32.2 to 35.5) | 44368 (42373 to 46118)    | 893.5 (856.9 to 928.4) | 3759 (2604 to 5124)                | 73.1 (50.7 to 99.7) | 48128 (45791 to 50431)                 | 966.6 (922.3 to 1010.8) | 6134 (4718 to 7906)  | 77.5 (58.8 to 100.4) | 69981 (58940 to 83594)  | 861.9 (713.3 to 1050.1) | 1689 (1466 to 1852) | 17.8 (15.9 to 19.4) | 32863 (29569 to 35525)    | 421.8 (385.7 to 454.8) | 4732 (3062 to 6819)                | 59.5 (38.2 to 87.6) | 37595 (33616 to 41445)                 | 481.3 (435.1 to 531.5) |
|                            | Male   | 24 (20 to 30)       | 0.6 (0.5 to 0.7)      | 221 (184 to 264)       | 5.2 (4.3 to 6.1)         | 10 (8 to 11)        | 0.2 (0.2 to 0.3)    | 207 (182 to 234)          | 4.9 (4.3 to 5.5)       | 20 (13 to 29)                      | 0.5 (0.3 to 0.7)    | 228 (199 to 257)                       | 5.4 (4.7 to 6.1)        | 26 (18 to 37)        | 0.4 (0.3 to 0.5)     | 292 (227 to 377)        | 3.9 (3.1 to 5)          | 8 (6 to 10)         | 0.1 (0.1 to 0.1)    | 155 (126 to 186)          | 2.2 (1.8 to 2.6)       | 24 (15 to 37)                      | 0.3 (0.2 to 0.5)    | 179 (146 to 218)                       | 2.5 (2.1 to 3)         |
| Syrian Arab Republic       | Both   | 425 (306 to 570)    | 6.6 (4.8 to 8.8)      | 4240 (3333 to 5313)    | 69.8 (55.5 to 86.8)      | 237 (171 to 314)    | 4 (2.9 to 5.3)      | 8300 (5972 to 11071)      | 125.2 (90.1 to 165.6)  | 295 (183 to 429)                   | 4.7 (2.9 to 6.8)    | 8595 (6203 to 11485)                   | 129.8 (93.6 to 172.2)   | 1882 (1311 to 2638)  | 13.4 (9.4 to 18.7)   | 17125 (12587 to 23029)  | 122.2 (91.6 to 163.1)   | 715 (504 to 1010)   | 5.4 (3.9 to 7.5)    | 22882 (15934 to 32655)    | 159.1 (111.8 to 224.2) | 1255 (753 to 1924)                 | 8.9 (5.5 to 13.6)   | 24137 (16868 to 34521)                 | 168 (119.2 to 237.2)   |
|                            | Female | 422 (304 to 567)    | 13.7 (9.8 to 18.1)    | 4217 (3310 to 5288)    | 144.5 (114.7 to 179.7)   | 236 (169 to 312)    | 8.3 (6 to 11)       | 8245 (5916 to 11022)      | 256.7 (184.2 to 340.4) | 293 (182 to 427)                   | 9.6 (6 to 14.1)     | 8539 (6149 to 11423)                   | 266.3 (191.5 to 353.6)  | 1873 (1303 to 2628)  | 26.9 (18.9 to 37.3)  | 17051 (12521 to 22955)  | 244.8 (184.6 to 324.5)  | 711 (500 to 1004)   | 11.3 (8.1 to 15.5)  | 22758 (15848 to 32520)    | 316.2 (222.8 to 446.3) | 1248 (749 to 1916)                 | 17.8 (10.9 to 27.1) | 24006 (16758 to 34377)                 | 334 (237.3 to 472.1)   |
|                            | Male   | 3 (2 to 3)          | 0.1 (0.1 to 0.1)      | 23 (18 to 29)          | 0.8 (0.6 to 1)           | 2 (1 to 2)          | 0.1 (0 to 0.1)      | 55 (41 to 70)             | 1.6 (1.2 to 2)         | 2 (1 to 3)                         | 0.1 (0 to 0.1)      | 57 (43 to 72)                          | 1.6 (1.2 to 2.1)        | 9 (6 to 12)          | 0.1 (0.1 to 0.2)     | 74 (55 to 97)           | 1.1 (0.9 to 1.5)        | 4 (3 to 6)          | 0.1 (0.1 to 0.1)    | 124 (86 to 170)           | 1.8 (1.3 to 2.4)       | 7 (4 to 10)                        | 0.1 (0.1 to 0.1)    | 130 (91 to 178)                        | 1.9 (1.3 to 2.6)       |
| Taiwan (Province of China) | Both   | 1981 (1877 to 2093) | 10.8 (10.3 to 11.4)   | 19509 (17999 to 21066) | 109.2 (100.8 to 119)     | 742 (712 to 772)    | 4.4 (4.2 to 4.6)    | 25590 (24545 to 26689)    | 138.9 (133.3 to 144.7) | 1398 (949 to 1928)                 | 7.7 (5.2 to 10.6)   | 26988 (25868 to 28196)                 | 146.6 (140.5 to 153.2)  | 9330 (7069 to 12459) | 25.5 (19.3 to 34)    | 96121 (77577 to 121000) | 259 (207.3 to 330.2)    | 2333 (1828 to 3015) | 6.1 (4.8 to 7.9)    | 66900 (51867 to 88146)    | 181.5 (140.3 to 240.1) | 6695 (4260 to 9840)                | 18.3 (11.6 to 27.1) | 73595 (56993 to 96000)                 | 199.8 (154.7 to 261.9) |
|                            | Female | 1968 (1863 to 2082) | 22.4 (21.3 to 23.6)   | 19418 (17907 to 20974) | 227.1 (209.1 to 248.3)   | 735 (705 to 765)    | 9 (8.6 to 9.4)      | 25406 (24361 to 26497)    | 287.4 (275.9 to 299.3) | 1388 (942 to 1918)                 | 15.9 (10.8 to 21.9) | 26794 (25677 to 28007)                 | 303.3 (290.6 to 316.8)  | 9289 (7038 to 12405) | 49.4 (37.2 to 65.9)  | 95823 (77317 to 120631) | 499.9 (399.1 to 638.3)  | 2317 (1816 to 2989) | 11.6 (9 to 15)      | 66552 (51510 to 87735)    | 350.6 (270.3 to 464.2) | 6664 (4241 to 9791)                | 35.3 (22.5 to 52.6) | 73217 (56668 to 95519)                 | 386 (298.6 to 506.2)   |
|                            | Male   | 13 (11 to 15)       | 0.2 (0.1 to 0.2)      | 92 (77 to 108)         | 1.1 (0.9 to 1.2)         | 7 (6 to 8)          | 0.1 (0.1 to 0.1)    | 184 (165 to 206)          | 2.2 (2 to 2.4)         | 10 (6 to 13)                       | 0.1 (0.1 to 0.2)    | 194 (173 to 216)                       | 2.3 (2.1 to 2.6)        | 41 (29 to 57)        | 0.2 (0.2 to 0.3)     | 298 (208 to 416)        | 1.7 (1.2 to 2.4)        | 16 (12 to 22)       | 0.1 (0.1 to 0.1)    | 348 (253 to 473)          | 2 (1.5 to 2.6)         | 31 (19 to 48)                      | 0.2 (0.1 to 0.3)    | 379 (276 to 513)                       | 2.2 (1.6 to 2.9)       |
| Tajikistan                 | Both   | 389 (344 to 437)    | 12.9 (11.4 to 14.5)   | 3458 (3045 to 3868)    | 116 (102.1 to 130.1)     | 236 (210 to 262)    | 8.1 (7.2 to 9)      | 7818 (6948 to 8771)       | 252.8 (225 to 284.1)   | 254 (174 to 348)                   | 8.4 (5.7 to 11.4)   | 8072 (7188 to 9083)                    | 261.1 (232.3 to 293.6)  | 862 (666 to 1107)    | 13.5 (10.6 to 17.2)  | 7237 (5807 to 8959)     | 113.5 (94 to 136.8)     | 445 (345 to 567)    | 8 (6.4 to 10.1)     | 15149 (11600 to 19507)    | 223.9 (174.4 to 284.7) | 553 (355 to 806)                   | 8.5 (5.6 to 12.2)   | 15702 (12018 to 20223)                 | 232.4 (181.4 to 294.8) |
|                            | Female | 388 (343 to 436)    | 24.4 (21.6 to 27.5)   | 3450 (3038 to 3859)    | 217.2 (191 to 242.8)     | 235 (209 to 262)    | 15 (13.3 to 16.7)   | 7800 (6932 to 8753)       | 485.8 (431.5 to 547.4) | 253 (174 to 347)                   | 15.8 (10.9 to 21.6) | 8053 (7170 to 9065)                    | 501.6 (445.9 to 565.1)  | 859 (663 to 1104)    | 26 (20.3 to 33)      | 7214 (5788 to 8931)     | 218.4 (180.1 to 264)    | 443 (344 to 565)    | 15.2 (12 to 19.1)   | 15094 (11559 to 19440)    | 433.8 (337.5 to 552.1) | 551 (354 to 802)                   | 16.4 (10.7 to 23.6) | 15645 (11972 to 20153)                 | 450.2 (350.6 to 571.6) |
|                            | Male   | 1 (1 to 1)          | 0.1 (0 to 0.1)        | 8 (6 to 10)            | 0.5 (0.4 to 0.6)         | 1 (0 to 1)          | 0 (0 to 0.1)        | 18 (15 to 22)             | 1.1 (0.9 to 1.4)       | 1 (0 to 1)                         | 0 (0 to 0.1)        | 19 (16 to 23)                          | 1.2 (1 to 1.4)          | 3 (2 to 4)           | 0.1 (0.1 to 0.2)     | 24 (17 to 31)           | 0.9 (0.6 to 1.1)        | 2 (1 to 3)          | 0.1 (0.1 to 0.1)    | 54 (40 to 73)             | 2 (1.4 to 2.7)         | 2 (1 to 3)                         | 0.1 (0.1 to 0.1)    | 57 (42 to 76)                          | 2.1 (1.5 to 2.8)       |

|                     |        | 1990                   |                        |                           |                           |                        |                        |                           |                            |                                    |                        |                                        |                            | 2019                      |                        |                              |                           |                        |                        |                              |                            |                                    |                        |                                        |                           |
|---------------------|--------|------------------------|------------------------|---------------------------|---------------------------|------------------------|------------------------|---------------------------|----------------------------|------------------------------------|------------------------|----------------------------------------|----------------------------|---------------------------|------------------------|------------------------------|---------------------------|------------------------|------------------------|------------------------------|----------------------------|------------------------------------|------------------------|----------------------------------------|---------------------------|
|                     |        | Incidence              |                        | Prevalence                |                           | Deaths                 |                        | YLLs (Years of Life Lost) |                            | YLDs (Years Lived with Disability) |                        | DALYs (Disability-Adjusted Life Years) |                            | Incidence                 |                        | Prevalence                   |                           | Deaths                 |                        | YLLs (Years of Life Lost)    |                            | YLDs (Years Lived with Disability) |                        | DALYs (Disability-Adjusted Life Years) |                           |
| Location            | Sex    | Number                 | Rate                   | Number                    | Rate                      | Number                 | Rate                   | Number                    | Rate                       | Number                             | Rate                   | Number                                 | Rate                       | Number                    | Rate                   | Number                       | Rate                      | Number                 | Rate                   | Number                       | Rate                       | Number                             | Rate                   | Number                                 | Rate                      |
| Thailand            | Both   | 4398<br>(3774 to 5109) | 10.2<br>(8.8 to 11.7)  | 38435<br>(33719 to 43843) | 90.7<br>(79.3 to 103.3)   | 2502<br>(2174 to 2866) | 6.3 (5.5 to 7.2)       | 85210<br>(73182 to 98400) | 190.3<br>(164.7 to 218.7)  | 2866<br>(1905 to 4017)             | 6.6 (4.4 to 9.2)       | 88076<br>(75497 to 101347)             | 196.9<br>(170.3 to 225.9)  | 17739<br>(12784 to 23841) | 17.6<br>(12.7 to 23.5) | 172494<br>(133214 to 219868) | 169.9<br>(131.8 to 217)   | 6834<br>(5022 to 8995) | 6.7 (4.9 to 8.8)       | 198558<br>(142209 to 266157) | 195.8<br>(140 to 262.9)    | 12213<br>(7627 to 18371)           | 12.1<br>(7.5 to 18.2)  | 210771<br>(152046 to 282030)           | 207.9<br>(149.9 to 278.2) |
|                     | Female | 4327<br>(3714 to 5042) | 19 (16.4 to 22)        | 38015<br>(33322 to 43350) | 170.2<br>(148.4 to 193.7) | 2451<br>(2122 to 2816) | 11.5 (10 to 13.3)      | 83805<br>(71925 to 97031) | 358.1<br>(309.5 to 412.7)  | 2821<br>(1868 to 3958)             | 12.3<br>(8.2 to 17.2)  | 86625<br>(74254 to 99940)              | 370.4<br>(320.1 to 426.1)  | 17657<br>(12731 to 23719) | 33.3<br>(23.9 to 44.6) | 171882<br>(132818 to 219234) | 321.6<br>(248.4 to 411.9) | 6790<br>(4986 to 8937) | 12.4<br>(9.1 to 16.4)  | 197518<br>(141439 to 264810) | 371.6<br>(266 to 499.7)    | 12153<br>(7577 to 18290)           | 23 (14.3 to 34.7)      | 209671<br>(151315 to 280747)           | 394.6<br>(284 to 529)     |
|                     | Male   | 71 (53 to 94)          | 0.4 (0.3 to 0.6)       | 420<br>(319 to 546)       | 2.3 (1.8 to 3.1)          | 51 (39 to 69)          | 0.4 (0.3 to 0.5)       | 1406<br>(1085 to 1820)    | 7.7 (5.9 to 10.3)          | 45 (29 to 67)                      | 0.3 (0.2 to 0.4)       | 1451<br>(1116 to 1882)                 | 8 (6.1 to 10.6)            | 83 (52 to 119)            | 0.2 (0.1 to 0.3)       | 612<br>(408 to 870)          | 1.3 (0.9 to 1.9)          | 44 (29 to 63)          | 0.1 (0.1 to 0.1)       | 1040<br>(669 to 1502)        | 2.3 (1.5 to 3.3)           | 60 (34 to 98)                      | 0.1 (0.1 to 0.2)       | 1100<br>(705 to 1583)                  | 2.4 (1.6 to 3.4)          |
| Timor-Leste         | Both   | 31 (22 to 42)          | 7.9 (5.7 to 10.6)      | 223<br>(170 to 293)       | 58.6<br>(46.4 to 74.3)    | 23 (16 to 31)          | 6.4 (4.7 to 8.4)       | 822<br>(585 to 1130)      | 194.4<br>(140.3 to 262.6)  | 18 (11 to 27)                      | 4.5 (2.8 to 6.7)       | 840<br>(595 to 1156)                   | 199<br>(143.6 to 267.9)    | 109 (73 to 150)           | 12.4<br>(8.7 to 17.1)  | 804<br>(563 to 1092)         | 90.7<br>(65.3 to 121.8)   | 68 (48 to 94)          | 8.2 (5.9 to 11.2)      | 2110<br>(1370 to 2957)       | 237<br>(157.8 to 331.7)    | 64 (38 to 98)                      | 7.3 (4.4 to 10.9)      | 2174<br>(1411 to 3052)                 | 244.2<br>(162.6 to 342.9) |
|                     | Female | 30 (22 to 42)          | 16 (11.5 to 21.6)      | 221<br>(169 to 292)       | 119<br>(93.9 to 150.8)    | 23 (16 to 31)          | 13 (9.3 to 17)         | 815<br>(580 to 1122)      | 395.4<br>(283.9 to 535.5)  | 18 (11 to 26)                      | 9.2 (5.8 to 13.6)      | 833<br>(589 to 1146)                   | 404.7<br>(290.2 to 546.8)  | 107 (73 to 149)           | 24.9<br>(17.3 to 34.5) | 798<br>(558 to 1083)         | 182.5<br>(131 to 245.7)   | 67 (47 to 93)          | 16.3<br>(11.6 to 22.4) | 2087<br>(1357 to 2932)       | 476.7<br>(316.9 to 669.8)  | 64 (38 to 97)                      | 14.5<br>(8.8 to 21.8)  | 2150<br>(1398 to 3025)                 | 491.2<br>(326.6 to 691)   |
|                     | Male   | 0 (0 to 0)             | 0.2 (0.1 to 0.3)       | 1 (1 to 2)                | 0.8 (0.5 to 1.2)          | 0 (0 to 0)             | 0.2 (0.1 to 0.3)       | 7 (4 to 10)               | 3.8 (2.4 to 5.7)           | 0 (0 to 0)                         | 0.1 (0.1 to 0.2)       | 7 (4 to 10)                            | 3.9 (2.5 to 5.9)           | 1 (1 to 2)                | 0.3 (0.2 to 0.5)       | 6 (4 to 10)                  | 1.5 (0.9 to 2.3)          | 1 (1 to 1)             | 0.2 (0.2 to 0.4)       | 24 (14 to 36)                | 5.4 (3.4 to 8.4)           | 1 (0 to 1)                         | 0.2 (0.1 to 0.3)       | 24 (15 to 38)                          | 5.6 (3.4 to 8.6)          |
| Togo                | Both   | 152<br>(121 to 188)    | 10.1<br>(8.2 to 12.3)  | 1027<br>(848 to 1244)     | 67.5 (57 to 80.1)         | 111 (89 to 136)        | 8.1 (6.6 to 9.7)       | 3771<br>(2983 to 4660)    | 229.9<br>(183.5 to 281.5)  | 87 (58 to 123)                     | 5.6 (3.8 to 7.9)       | 3858<br>(3054 to 4778)                 | 235.6<br>(188.5 to 289)    | 596<br>(438 to 811)       | 13.9<br>(10.6 to 18.5) | 4158<br>(3159 to 5536)       | 92.9<br>(73.1 to 120.3)   | 392<br>(295 to 523)    | 10.3 (8 to 13.5)       | 12737<br>(9260 to 17327)     | 270.6<br>(202.1 to 361.7)  | 347<br>(218 to 521)                | 7.8 (5 to 11.5)        | 13084<br>(9505 to 17798)               | 278.3<br>(208 to 373.1)   |
|                     | Female | 151<br>(120 to 187)    | 18.9<br>(15.3 to 23)   | 1021<br>(843 to 1238)     | 126.4<br>(106.7 to 149.8) | 110 (88 to 135)        | 15 (12.2 to 18)        | 3749<br>(2963 to 4636)    | 429.4<br>(342.4 to 525.4)  | 86 (57 to 122)                     | 10.5<br>(7.1 to 14.9)  | 3835<br>(3034 to 4751)                 | 439.9<br>(351.8 to 538.7)  | 593<br>(435 to 808)       | 24.4<br>(18.5 to 32.6) | 4140<br>(3143 to 5511)       | 165.2<br>(129.3 to 215.7) | 390<br>(292 to 520)    | 17.6<br>(13.6 to 23.2) | 12666<br>(9209 to 17253)     | 484.9<br>(358.8 to 651.1)  | 345<br>(217 to 519)                | 13.8<br>(8.8 to 20.4)  | 13011<br>(9434 to 17722)               | 498.7<br>(369.6 to 667.9) |
|                     | Male   | 1 (1 to 1)             | 0.1 (0.1 to 0.2)       | 5 (4 to 7)                | 0.7 (0.5 to 1.1)          | 1 (1 to 1)             | 0.1 (0.1 to 0.2)       | 23 (16 to 32)             | 3.1 (2.2 to 4.5)           | 1 (0 to 1)                         | 0.1 (0.1 to 0.1)       | 23 (17 to 33)                          | 3.2 (2.3 to 4.6)           | 3 (2 to 5)                | 0.2 (0.1 to 0.3)       | 19 (13 to 27)                | 1 (0.7 to 1.4)            | 2 (2 to 3)             | 0.2 (0.1 to 0.2)       | 71 (48 to 105)               | 3.8 (2.5 to 5.6)           | 2 (1 to 3)                         | 0.1 (0.1 to 0.2)       | 73 (49 to 107)                         | 3.9 (2.6 to 5.7)          |
| Tokelau             | Both   | 0 (0 to 0)             | 21.1<br>(12.3 to 30.4) | 2 (1 to 3)                | 170.4<br>(117.3 to 227.7) | 0 (0 to 0)             | 14.6<br>(8.6 to 20.9)  | 5 (3 to 8)                | 440.7<br>(257.1 to 642.1)  | 0 (0 to 0)                         | 12.9<br>(7.1 to 20.1)  | 6 (3 to 8)                             | 453.5<br>(266.8 to 659)    | 0 (0 to 1)                | 31.8<br>(21.8 to 44.5) | 3 (3 to 5)                   | 254.4<br>(185.9 to 344.7) | 0 (0 to 0)             | 16.9<br>(11.7 to 22.9) | 6 (4 to 9)                   | 479.5<br>(325.9 to 674.8)  | 0 (0 to 0)                         | 19.8<br>(12.3 to 29.4) | 7 (5 to 9)                             | 499.3<br>(339.5 to 702)   |
|                     | Female | 0 (0 to 0)             | 38.2<br>(22.3 to 55.3) | 2 (1 to 3)                | 308.8<br>(213 to 413.1)   | 0 (0 to 0)             | 26.4<br>(15.5 to 37.9) | 5 (3 to 8)                | 798.1<br>(464.4 to 1166.3) | 0 (0 to 0)                         | 23.3<br>(12.8 to 36.4) | 6 (3 to 8)                             | 821.4<br>(481.9 to 1193)   | 0 (0 to 1)                | 64 (44 to 89.6)        | 3 (3 to 5)                   | 514.2<br>(375.4 to 699.3) | 0 (0 to 0)             | 33.7<br>(23.4 to 46)   | 6 (4 to 9)                   | 967.1<br>(658.3 to 1362.6) | 0 (0 to 0)                         | 39.9<br>(24.9 to 59.4) | 7 (5 to 9)                             | 1007<br>(685.6 to 1414.4) |
|                     | Male   | 0 (0 to 0)             | 0.2 (0.1 to 0.4)       | 0 (0 to 0)                | 1.5 (1 to 2.1)            | 0 (0 to 0)             | 0.2 (0.1 to 0.3)       | 0 (0 to 0)                | 4.4 (2.5 to 7.1)           | 0 (0 to 0)                         | 0.1 (0.1 to 0.3)       | 0 (0 to 0)                             | 4.5 (2.6 to 7.3)           | 0 (0 to 0)                | 0.3 (0.2 to 0.6)       | 0 (0 to 0)                   | 2.2 (1.4 to 3.3)          | 0 (0 to 0)             | 0.2 (0.1 to 0.4)       | 0 (0 to 0)                   | 5.2 (3.2 to 8.5)           | 0 (0 to 0)                         | 0.2 (0.1 to 0.4)       | 0 (0 to 0)                             | 5.4 (3.3 to 8.9)          |
| Tonga               | Both   | 14 (11 to 17)          | 22.7<br>(17.9 to 28.3) | 110 (89 to 133)           | 180.7<br>(147.3 to 217.2) | 9 (7 to 11)            | 15.3<br>(12.1 to 18.8) | 278<br>(215 to 353)       | 448.6<br>(349.3 to 566.3)  | 8 (5 to 12)                        | 13.7 (9 to 18.8)       | 287<br>(221 to 363)                    | 462.3<br>(359.9 to 581.1)  | 24 (18 to 32)             | 29.4<br>(21.7 to 38.5) | 197<br>(154 to 251)          | 238.7<br>(187.7 to 300.7) | 14 (11 to 18)          | 17.5<br>(13.2 to 22.6) | 401<br>(292 to 537)          | 481.2<br>(351.8 to 640.9)  | 15 (10 to 22)                      | 18 (11.7 to 26.6)      | 416<br>(305 to 555)                    | 499.2<br>(366.9 to 662.3) |
|                     | Female | 14 (11 to 17)          | 43.2 (34 to 54.1)      | 110 (89 to 133)           | 345.8<br>(281.5 to 415.7) | 9 (7 to 11)            | 28.8<br>(22.8 to 35.6) | 278<br>(214 to 353)       | 856.8<br>(666.6 to 1081.5) | 8 (5 to 12)                        | 26.1<br>(17.2 to 35.8) | 286<br>(221 to 362)                    | 882.9<br>(687.5 to 1109.7) | 24 (18 to 32)             | 55.6<br>(40.9 to 73.1) | 197<br>(153 to 251)          | 455.4<br>(357.1 to 575.4) | 14 (11 to 18)          | 32.3<br>(24.3 to 42)   | 401<br>(291 to 536)          | 919.7<br>(669.7 to 1228.5) | 15 (10 to 22)                      | 34.2<br>(22.2 to 50.8) | 416<br>(304 to 554)                    | 954<br>(699.3 to 1271.8)  |
|                     | Male   | 0 (0 to 0)             | 0.1 (0 to 0.1)         | 0 (0 to 0)                | 0.5 (0.4 to 0.7)          | 0 (0 to 0)             | 0.1 (0 to 0.1)         | 0 (0 to 1)                | 1.3 (0.9 to 1.8)           | 0 (0 to 0)                         | 0 (0 to 0.1)           | 0 (0 to 1)                             | 1.3 (0.9 to 1.9)           | 0 (0 to 0)                | 0.1 (0.1 to 0.1)       | 0 (0 to 0)                   | 0.6 (0.5 to 0.9)          | 0 (0 to 0)             | 0.1 (0 to 0.1)         | 1 (0 to 1)                   | 1.5 (1 to 2.1)             | 0 (0 to 0)                         | 0.1 (0 to 0.1)         | 1 (0 to 1)                             | 1.5 (1.1 to 2.2)          |
| Trinidad and Tobago | Both   | 242<br>(223 to 263)    | 27.6<br>(25.6 to 30)   | 1878<br>(1736 to 2037)    | 210.9<br>(194.5 to 229.3) | 122<br>(114 to 130)    | 14.9<br>(13.9 to 15.9) | 3606<br>(3345 to 3865)    | 400.4<br>(372.3 to 428.7)  | 141<br>(102 to 188)                | 15.8<br>(11.5 to 21.2) | 3746<br>(3481 to 4005)                 | 416.3<br>(386.6 to 444.4)  | 545<br>(401 to 732)       | 29.9<br>(21.9 to 39.9) | 4478<br>(3374 to 5842)       | 244.2<br>(184.2 to 317.4) | 230<br>(174 to 299)    | 12.7<br>(9.6 to 16.4)  | 6134<br>(4508 to 8149)       | 337.2<br>(247.4 to 449.1)  | 323<br>(206 to 469)                | 17.7<br>(11.4 to 25.9) | 6457<br>(4763 to 8578)                 | 354.9<br>(261.1 to 472.5) |

|              |        | 1990                   |                        |                           |                           |                        |                        |                            |                           |                                    |                        |                                        |                            | 2019                      |                        |                              |                           |                        |                        |                              |                           |                                    |                        |                                        |                           |
|--------------|--------|------------------------|------------------------|---------------------------|---------------------------|------------------------|------------------------|----------------------------|---------------------------|------------------------------------|------------------------|----------------------------------------|----------------------------|---------------------------|------------------------|------------------------------|---------------------------|------------------------|------------------------|------------------------------|---------------------------|------------------------------------|------------------------|----------------------------------------|---------------------------|
|              |        | Incidence              |                        | Prevalence                |                           | Deaths                 |                        | YLLs (Years of Life Lost)  |                           | YLDs (Years Lived with Disability) |                        | DALYs (Disability-Adjusted Life Years) |                            | Incidence                 |                        | Prevalence                   |                           | Deaths                 |                        | YLLs (Years of Life Lost)    |                           | YLDs (Years Lived with Disability) |                        | DALYs (Disability-Adjusted Life Years) |                           |
| Location     | Sex    | Number                 | Rate                   | Number                    | Rate                      | Number                 | Rate                   | Number                     | Rate                      | Number                             | Rate                   | Number                                 | Rate                       | Number                    | Rate                   | Number                       | Rate                      | Number                 | Rate                   | Number                       | Rate                      | Number                             | Rate                   | Number                                 | Rate                      |
|              | Female | 241<br>(222 to 262)    | 52.9<br>(48.9 to 57.6) | 1870<br>(1728 to 2029)    | 407.3<br>(375.3 to 443.1) | 121<br>(113 to 130)    | 27.7<br>(25.8 to 29.6) | 3585<br>(3325 to 3843)     | 774.2<br>(719.3 to 829.7) | 140<br>(101 to 188)                | 30.5<br>(22.1 to 40.9) | 3725<br>(3461 to 3985)                 | 804.6<br>(746.9 to 860.1)  | 537<br>(395 to 720)       | 57.7<br>(42.3 to 77.5) | 4429<br>(3340 to 5784)       | 475.6<br>(357.6 to 620.3) | 225<br>(171 to 293)    | 23.7<br>(17.9 to 30.9) | 6014<br>(4405 to 8000)       | 653<br>(476.4 to 874.5)   | 318<br>(203 to 462)                | 34.3<br>(21.9 to 50.2) | 6332<br>(4668 to 8403)                 | 687.3<br>(503.7 to 917.4) |
|              | Male   | 1 (1 to 1)             | 0.3 (0.2 to 0.3)       | 7 (6 to 9)                | 1.8 (1.6 to 2.1)          | 1 (1 to 1)             | 0.2 (0.2 to 0.2)       | 21 (18 to 23)              | 5 (4.4 to 5.5)            | 1 (0 to 1)                         | 0.2 (0.1 to 0.2)       | 21 (19 to 24)                          | 5.1 (4.6 to 5.7)           | 8 (5 to 10)               | 0.9 (0.6 to 1.2)       | 50 (35 to 68)                | 5.5 (3.9 to 7.5)          | 5 (3 to 6)             | 0.6 (0.4 to 0.8)       | 120 (84 to 165)              | 13.4<br>(9.5 to 18.2)     | 5 (3 to 7)                         | 0.5 (0.3 to 0.8)       | 125 (88 to 171)                        | 13.9<br>(9.8 to 18.9)     |
| Tunisia      | Both   | 695<br>(569 to 855)    | 12.7<br>(10.4 to 15.6) | 6327<br>(5296 to 7511)    | 115.7<br>(97.5 to 136.6)  | 365<br>(300 to 446)    | 7.2 (5.9 to 8.8)       | 11620<br>(9585 to 14242)   | 205.5<br>(169.2 to 250.8) | 461<br>(312 to 666)                | 8.3 (5.7 to 12.1)      | 12081<br>(9951 to 14821)               | 213.9<br>(176.3 to 261.6)  | 3172<br>(2272 to 4293)    | 23.9<br>(17.2 to 32.2) | 29197<br>(22255 to 37786)    | 219.3<br>(168.1 to 282)   | 1061<br>(771 to 1416)  | 8.3 (6.1 to 11)        | 31544<br>(22596 to 42620)    | 235<br>(168.2 to 316)     | 2144<br>(1329 to 3280)             | 16.1<br>(10.1 to 24.6) | 33687<br>(24084 to 45533)              | 251.1<br>(179.7 to 337.4) |
|              | Female | 680<br>(557 to 840)    | 25 (20.4 to 30.9)      | 6221<br>(5208 to 7373)    | 230.5<br>(194.1 to 271.9) | 354<br>(291 to 436)    | 14 (11.5 to 17.3)      | 11368<br>(9354 to 13948)   | 405.7<br>(333.5 to 497.9) | 451<br>(302 to 653)                | 16.5<br>(11.2 to 23.9) | 11818<br>(9707 to 14518)               | 422.1<br>(347.5 to 518.3)  | 3129<br>(2241 to 4237)    | 46 (33 to 62.2)        | 28854<br>(21971 to 37331)    | 424<br>(323.8 to 546)     | 1039<br>(753 to 1386)  | 15.7<br>(11.5 to 20.9) | 31032<br>(22110 to 42022)    | 452.5<br>(323.5 to 610.4) | 2112<br>(1314 to 3227)             | 31 (19.3 to 47.4)      | 33143<br>(23657 to 44761)              | 483.5<br>(345.2 to 650.3) |
|              | Male   | 15 (10 to 20)          | 0.6 (0.4 to 0.8)       | 106 (77 to 143)           | 4.1 (3 to 5.4)            | 10 (7 to 14)           | 0.5 (0.3 to 0.6)       | 253<br>(171 to 354)        | 9.6 (6.6 to 13.3)         | 10 (6 to 16)                       | 0.4 (0.2 to 0.6)       | 263<br>(178 to 368)                    | 10 (6.8 to 13.8)           | 43 (26 to 69)             | 0.7 (0.4 to 1.1)       | 343<br>(226 to 520)          | 5.6 (3.7 to 8.3)          | 22 (13 to 34)          | 0.4 (0.2 to 0.6)       | 512<br>(301 to 812)          | 8.2 (4.8 to 12.8)         | 32 (17 to 55)                      | 0.5 (0.3 to 0.9)       | 544<br>(317 to 860)                    | 8.7 (5.2 to 13.5)         |
| Turkey       | Both   | 4133<br>(3279 to 5244) | 10.2<br>(8.1 to 12.9)  | 36174<br>(30246 to 44134) | 90.6<br>(76.4 to 109.9)   | 2516<br>(2001 to 3203) | 6.5 (5.2 to 8.3)       | 81484<br>(64427 to 104083) | 193.7<br>(153.9 to 246)   | 2654<br>(1764 to 3840)             | 6.5 (4.3 to 9.4)       | 84138<br>(66672 to 107245)             | 200.2<br>(159.2 to 252.8)  | 17380<br>(13655 to 21843) | 18.9<br>(14.9 to 23.8) | 157687<br>(128440 to 192668) | 171.1<br>(139.8 to 208.9) | 6049<br>(4828 to 7484) | 6.8 (5.5 to 8.4)       | 167844<br>(131471 to 211433) | 180.6<br>(142.1 to 227.2) | 11566<br>(7814 to 16767)           | 12.5<br>(8.5 to 18.2)  | 179410<br>(141036 to 225876)           | 193.1<br>(152.4 to 242.2) |
|              | Female | 4047<br>(3201 to 5151) | 19.4<br>(15.4 to 24.6) | 35606<br>(29744 to 43550) | 173.4<br>(145.5 to 210.6) | 2450<br>(1949 to 3126) | 12.3<br>(9.8 to 15.6)  | 79721<br>(63118 to 102190) | 372.9<br>(295.4 to 475.9) | 2598<br>(1722 to 3757)             | 12.4<br>(8.3 to 18)    | 82319<br>(65124 to 105081)             | 385.3<br>(306 to 488.2)    | 17130<br>(13440 to 21566) | 36.1<br>(28.3 to 45.5) | 155738<br>(127069 to 190476) | 327.7<br>(267.8 to 400.7) | 5926<br>(4729 to 7337) | 12.6<br>(10.1 to 15.7) | 164911<br>(129220 to 207565) | 345.9<br>(271.3 to 435.3) | 11381<br>(7681 to 16496)           | 24 (16.1 to 34.7)      | 176292<br>(138548 to 222264)           | 369.8<br>(291 to 464.6)   |
|              | Male   | 86 (56 to 131)         | 0.5 (0.3 to 0.8)       | 568<br>(390 to 815)       | 3.2 (2.2 to 4.6)          | 66 (43 to 100)         | 0.4 (0.3 to 0.6)       | 1763<br>(1103 to 2692)     | 9.4 (6.1 to 14.5)         | 56 (32 to 88)                      | 0.3 (0.2 to 0.5)       | 1819<br>(1149 to 2772)                 | 9.8 (6.4 to 14.9)          | 250<br>(177 to 351)       | 0.6 (0.4 to 0.8)       | 1950<br>(1424 to 2688)       | 4.6 (3.4 to 6.3)          | 123 (87 to 165)        | 0.3 (0.2 to 0.4)       | 2933<br>(2100 to 3987)       | 6.8 (4.9 to 9.2)          | 185<br>(115 to 288)                | 0.4 (0.3 to 0.7)       | 3118<br>(2237 to 4234)                 | 7.3 (5.2 to 9.8)          |
| Turkmenistan | Both   | 272<br>(253 to 292)    | 12.5<br>(11.6 to 13.4) | 2396<br>(2192 to 2612)    | 112.5<br>(102 to 123.5)   | 155<br>(145 to 164)    | 7.5 (7.1 to 8)         | 5212<br>(4882 to 5549)     | 230.8<br>(216.2 to 245.9) | 179<br>(121 to 244)                | 8.2 (5.6 to 11.1)      | 5391<br>(5054 to 5749)                 | 239<br>(224.2 to 254.7)    | 716<br>(560 to 931)       | 15.2<br>(11.9 to 19.6) | 6298<br>(5113 to 7867)       | 135.2<br>(111 to 167.2)   | 301<br>(237 to 383)    | 6.9 (5.4 to 8.6)       | 10276<br>(8034 to 13271)     | 214.1<br>(168.5 to 275.1) | 476<br>(310 to 703)                | 10.1<br>(6.7 to 14.8)  | 10752<br>(8441 to 13933)               | 224.3<br>(177 to 288.5)   |
|              | Female | 272<br>(252 to 291)    | 22.8<br>(21.1 to 24.4) | 2388<br>(2184 to 2603)    | 202.4<br>(184.2 to 221.8) | 154<br>(145 to 164)    | 13.3<br>(12.5 to 14.1) | 5197<br>(4866 to 5533)     | 428<br>(400.6 to 456.2)   | 178<br>(121 to 244)                | 14.9<br>(10.1 to 20.1) | 5375<br>(5038 to 5734)                 | 442.8<br>(414.4 to 471.8)  | 707<br>(553 to 920)       | 28.8<br>(22.6 to 37.3) | 6237<br>(5055 to 7788)       | 255.4<br>(208.4 to 317.3) | 296<br>(233 to 378)    | 12.5<br>(9.9 to 15.9)  | 10148<br>(7924 to 13113)     | 408.3<br>(320.1 to 526)   | 470<br>(306 to 695)                | 19.1<br>(12.5 to 28.1) | 10618<br>(8334 to 13794)               | 427.4<br>(336.8 to 553.5) |
|              | Male   | 1 (1 to 1)             | 0.1 (0.1 to 0.1)       | 8 (7 to 10)               | 0.9 (0.7 to 1)            | 0 (0 to 1)             | 0.1 (0.1 to 0.1)       | 15 (14 to 17)              | 1.5 (1.4 to 1.7)          | 1 (0 to 1)                         | 0.1 (0 to 0.1)         | 16 (15 to 18)                          | 1.6 (1.4 to 1.7)           | 9 (6 to 12)               | 0.5 (0.4 to 0.6)       | 62 (46 to 81)                | 3.2 (2.5 to 4.2)          | 5 (3 to 6)             | 0.3 (0.2 to 0.4)       | 128 (97 to 168)              | 6.6 (5.1 to 8.6)          | 6 (4 to 9)                         | 0.3 (0.2 to 0.5)       | 134<br>(102 to 175)                    | 7 (5.3 to 9.1)            |
| Tuvalu       | Both   | 2 (1 to 2)             | 22.7<br>(17.4 to 29.6) | 13 (10 to 16)             | 171.9<br>(137.3 to 211.9) | 1 (1 to 1)             | 16.7<br>(12.9 to 21.3) | 37 (28 to 49)              | 497<br>(373.5 to 649)     | 1 (1 to 1)                         | 13.5<br>(9.1 to 19.4)  | 38 (29 to 50)                          | 510.5<br>(383.1 to 662.7)  | 3 (2 to 4)                | 29.7<br>(20.6 to 42.4) | 24 (18 to 33)                | 223.9<br>(167.1 to 305.6) | 2 (1 to 3)             | 18.5 (13 to 25.9)      | 55 (38 to 79)                | 512<br>(352.5 to 734.4)   | 2 (1 to 3)                         | 17.8<br>(10.9 to 27.5) | 57 (39 to 82)                          | 529.8<br>(367.3 to 761.6) |
|              | Female | 2 (1 to 2)             | 39.2<br>(29.7 to 51.5) | 13 (10 to 16)             | 298.9<br>(236.6 to 370.6) | 1 (1 to 1)             | 28.4<br>(21.8 to 36.4) | 37 (28 to 49)              | 868<br>(649.5 to 1137.1)  | 1 (1 to 1)                         | 23.5<br>(15.7 to 33.8) | 38 (28 to 50)                          | 891.5<br>(665.8 to 1162.6) | 3 (2 to 4)                | 57.9<br>(39.9 to 83.2) | 24 (18 to 33)                | 438.5<br>(324.5 to 602.1) | 2 (1 to 3)             | 35.1<br>(24.5 to 49.4) | 55 (38 to 79)                | 1007.7<br>(691 to 1456.2) | 2 (1 to 3)                         | 34.9<br>(21.2 to 54.2) | 57 (39 to 82)                          | 1042.6<br>(714.4 to 1505) |
|              | Male   | 0 (0 to 0)             | 0.3 (0.2 to 0.5)       | 0 (0 to 0)                | 1.8 (1.3 to 2.8)          | 0 (0 to 0)             | 0.3 (0.2 to 0.5)       | 0 (0 to 0)                 | 6.2 (3.9 to 10.4)         | 0 (0 to 0)                         | 0.2 (0.1 to 0.3)       | 0 (0 to 0)                             | 6.4 (4 to 10.7)            | 0 (0 to 0)                | 0.4 (0.2 to 0.6)       | 0 (0 to 0)                   | 2.4 (1.6 to 3.4)          | 0 (0 to 0)             | 0.3 (0.2 to 0.5)       | 0 (0 to 1)                   | 7 (4.3 to 10.8)           | 0 (0 to 0)                         | 0.3 (0.1 to 0.4)       | 0 (0 to 1)                             | 7.3 (4.5 to 11.2)         |
| Uganda       | Both   | 824<br>(611 to 1053)   | 12.1<br>(9.2 to 15.2)  | 5055<br>(3893 to 6293)    | 71 (56.2 to 86.8)         | 671<br>(506 to 849)    | 10.6<br>(8.2 to 13.1)  | 20064<br>(14472 to 26103)  | 269.3<br>(199.3 to 345.3) | 457<br>(303 to 651)                | 6.5 (4.3 to 9)         | 20521<br>(14826 to 26748)              | 275.7<br>(203.8 to 353.5)  | 3145<br>(2342 to 4053)    | 19.1<br>(14.5 to 24)   | 21833<br>(16714 to 27635)    | 127.4<br>(100 to 156.7)   | 2112<br>(1596 to 2696) | 14.2 (11 to 17.7)      | 67932<br>(50255 to 88670)    | 378.5<br>(284.2 to 488.4) | 1814<br>(1185 to 2604)             | 10.6<br>(7.1 to 14.9)  | 69746<br>(51636 to 91567)              | 389.1<br>(292.7 to 502.8) |
|              | Female | 654<br>(461 to 866)    | 17.6<br>(12.8 to 22.9) | 4307<br>(3239 to 5445)    | 114.1<br>(87.6 to 141.5)  | 509<br>(368 to 665)    | 14.5<br>(10.7 to 18.6) | 16508<br>(11394 to 21992)  | 413.9<br>(291.9 to 547.6) | 370<br>(235 to 543)                | 9.7 (6.2 to 14.1)      | 16879<br>(11684 to 22422)              | 423.6<br>(298.9 to 560.5)  | 2937<br>(2158 to 3839)    | 31.4<br>(23.5 to 40.1) | 20719<br>(15763 to 26313)    | 216.7<br>(167.6 to 270.3) | 1935<br>(1444 to 2499) | 22.4<br>(17.1 to 28.4) | 63785<br>(46596 to 83229)    | 638.4<br>(473.1 to 832.7) | 1698<br>(1101 to 2453)             | 17.7<br>(11.6 to 25.2) | 65483<br>(47967 to 85665)              | 656.1<br>(486 to 859.3)   |

|                             |        | 1990                         |                         |                              |                            |                           |                        |                              |                           |                                    |                        |                                        |                             | 2019                         |                         |                              |                             |                           |                        |                              |                           |                                    |                        |                                        |                           |
|-----------------------------|--------|------------------------------|-------------------------|------------------------------|----------------------------|---------------------------|------------------------|------------------------------|---------------------------|------------------------------------|------------------------|----------------------------------------|-----------------------------|------------------------------|-------------------------|------------------------------|-----------------------------|---------------------------|------------------------|------------------------------|---------------------------|------------------------------------|------------------------|----------------------------------------|---------------------------|
|                             |        | Incidence                    |                         | Prevalence                   |                            | Deaths                    |                        | YLLs (Years of Life Lost)    |                           | YLDs (Years Lived with Disability) |                        | DALYs (Disability-Adjusted Life Years) |                             | Incidence                    |                         | Prevalence                   |                             | Deaths                    |                        | YLLs (Years of Life Lost)    |                           | YLDs (Years Lived with Disability) |                        | DALYs (Disability-Adjusted Life Years) |                           |
| Location                    | Sex    | Number                       | Rate                    | Number                       | Rate                       | Number                    | Rate                   | Number                       | Rate                      | Number                             | Rate                   | Number                                 | Rate                        | Number                       | Rate                    | Number                       | Rate                        | Number                    | Rate                   | Number                       | Rate                      | Number                             | Rate                   | Number                                 | Rate                      |
|                             | Male   | 171<br>(124 to 227)          | 6.7 (4.9 to 8.7)        | 747<br>(556 to 985)          | 26.2<br>(19.8 to 34.3)     | 162<br>(118 to 213)       | 6.7 (4.9 to 8.8)       | 3556<br>(2565 to 4701)       | 122.1<br>(90 to 160.2)    | 86 (55 to 127)                     | 3.1 (2.1 to 4.6)       | 3642<br>(2627 to 4825)                 | 125.2<br>(92.2 to 164.1)    | 208<br>(143 to 299)          | 4.2 (2.9 to 5.9)        | 1114<br>(801 to 1568)        | 20 (14.6 to 27.1)           | 177<br>(122 to 254)       | 3.9 (2.7 to 5.6)       | 4147<br>(2831 to 5974)       | 71.7<br>(49.9 to 102.2)   | 116 (71 to 177)                    | 2.2 (1.3 to 3.2)       | 4263<br>(2911 to 6159)                 | 73.9<br>(51.4 to 105.3)   |
| Ukraine                     | Both   | 18346<br>(17333 to 19472)    | 27.2<br>(25.6 to 28.8)  | 173184<br>(158562 to 191238) | 254.6<br>(233.7 to 279.7)  | 10203<br>(9752 to 10695)  | 14.8<br>(14.1 to 15.5) | 295910<br>(282043 to 309610) | 440<br>(420.6 to 460.8)   | 12155<br>(8451 to 16477)           | 18 (12.5 to 24.5)      | 308066<br>(293432 to 322833)           | 458<br>(437.3 to 479.6)     | 17869<br>(13990 to 22466)    | 26 (20.3 to 32.8)       | 174785<br>(143842 to 211757) | 249.8<br>(204.9 to 303.4)   | 8561<br>(6796 to 10688)   | 11.8<br>(9.4 to 14.8)  | 229886<br>(179746 to 291255) | 337.4<br>(261.9 to 430.8) | 12239<br>(8126 to 17287)           | 17.7<br>(11.8 to 25.4) | 242124<br>(192649 to 303818)           | 355.2<br>(281.5 to 447.1) |
|                             | Female | 18328<br>(17315 to 19452)    | 47 (44.3 to 49.9)       | 172986<br>(158374 to 191032) | 432.3<br>(398.4 to 470.6)  | 10193<br>(9743 to 10684)  | 24.6<br>(23.5 to 25.8) | 295638<br>(281770 to 309318) | 773.2<br>(739.1 to 811)   | 12140<br>(8439 to 16453)           | 31 (21.6 to 42.2)      | 307778<br>(293149 to 322524)           | 804.2<br>(767.2 to 843.9)   | 17667<br>(13772 to 22279)    | 45 (35 to 57.2)         | 173360<br>(142495 to 210314) | 428.8<br>(348.7 to 523.2)   | 8473<br>(6708 to 10581)   | 19.8<br>(15.6 to 24.9) | 227587<br>(177107 to 288924) | 589.5<br>(455.6 to 756.2) | 12090<br>(8005 to 17149)           | 30.6<br>(20.2 to 43.9) | 239676<br>(190349 to 301212)           | 620.1<br>(486.2 to 785)   |
|                             | Male   | 18 (16 to 22)                | 0.1 (0.1 to 0.1)        | 197<br>(163 to 240)          | 0.8 (0.6 to 0.9)           | 9 (8 to 11)               | 0 (0 to 0)             | 272<br>(240 to 309)          | 1 (0.9 to 1.1)            | 16 (10 to 22)                      | 0.1 (0 to 0.1)         | 288<br>(254 to 327)                    | 1.1 (1 to 1.2)              | 202<br>(145 to 278)          | 0.7 (0.5 to 1)          | 1425<br>(1031 to 1930)       | 5 (3.7 to 6.7)              | 88 (66 to 115)            | 0.3 (0.2 to 0.4)       | 2299<br>(1705 to 3027)       | 8 (6 to 10.5)             | 149 (92 to 229)                    | 0.5 (0.3 to 0.8)       | 2448<br>(1836 to 3211)                 | 8.5 (6.5 to 11.2)         |
| United Arab Emirates        | Both   | 91 (67 to 123)               | 14 (10 to 19.6)         | 775<br>(608 to 999)          | 123.8<br>(97.2 to 157.8)   | 48 (35 to 65)             | 9.4 (6.8 to 13.3)      | 1741<br>(1285 to 2336)       | 236.5<br>(169.9 to 328.2) | 59 (38 to 89)                      | 8.9 (5.7 to 13.4)      | 1800<br>(1326 to 2414)                 | 245.4<br>(176.6 to 341.3)   | 1271<br>(906 to 1738)        | 15 (11.5 to 19.4)       | 10882<br>(8046 to 14563)     | 136.5<br>(110 to 166.8)     | 455<br>(332 to 609)       | 7.3 (5.6 to 9.3)       | 17772<br>(12806 to 24064)    | 194.5<br>(148.3 to 253.1) | 834<br>(519 to 1265)               | 9.9 (6.5 to 14.2)      | 18606<br>(13399 to 25270)              | 204.4<br>(156.2 to 266.2) |
|                             | Female | 86 (63 to 119)               | 40.8<br>(28.7 to 57.8)  | 742<br>(577 to 967)          | 359<br>(280.7 to 461.4)    | 45 (32 to 62)             | 25.5<br>(17.9 to 36.3) | 1644<br>(1197 to 2243)       | 718<br>(506.1 to 1008.3)  | 56 (36 to 86)                      | 25.8<br>(16.3 to 39.5) | 1699<br>(1239 to 2336)                 | 743.8<br>(526.3 to 1041.7)  | 1220<br>(872 to 1648)        | 57.5<br>(43.3 to 73.7)  | 10461<br>(7740 to 13923)     | 519.3<br>(412.8 to 644.5)   | 430<br>(313 to 571)       | 26.2 (20 to 33.6)      | 16825<br>(12024 to 22574)    | 753.5<br>(565.4 to 977.7) | 796<br>(495 to 1212)               | 37.4<br>(24.2 to 54.5) | 17621<br>(12543 to 23549)              | 791<br>(594 to 1020.9)    |
|                             | Male   | 4 (2 to 7)                   | 1.2 (0.5 to 2.1)        | 33 (18 to 52)                | 7.8 (4.3 to 12.1)          | 3 (1 to 5)                | 1 (0.4 to 1.7)         | 98 (45 to 171)               | 21.1<br>(9.5 to 36.4)     | 3 (1 to 5)                         | 0.8 (0.3 to 1.3)       | 101 (47 to 176)                        | 21.9<br>(9.8 to 37.7)       | 51 (22 to 103)               | 1.1 (0.5 to 2)          | 421<br>(208 to 797)          | 8.5 (4.9 to 14.1)           | 25 (11 to 50)             | 0.7 (0.3 to 1.2)       | 947<br>(397 to 1935)         | 16.3<br>(7.6 to 29.3)     | 38 (16 to 80)                      | 0.8 (0.4 to 1.5)       | 985<br>(415 to 2013)                   | 17.1<br>(8.1 to 30.7)     |
| United Kingdom              | Both   | 42065<br>(40630 to 43112)    | 53 (51.5 to 54.3)       | 435227<br>(399818 to 480467) | 537.1<br>(499.4 to 584.3)  | 17431<br>(16531 to 17901) | 20.6<br>(19.6 to 21.1) | 396898<br>(384809 to 404168) | 510.1<br>(496.3 to 519.3) | 30854<br>(21758 to 42178)          | 38.6<br>(27.2 to 52.7) | 427752<br>(413199 to 441698)           | 548.8<br>(531.6 to 566.1)   | 53010<br>(42241 to 65883)    | 49.2<br>(38.9 to 61.7)  | 573393<br>(481491 to 685227) | 522.1<br>(433.8 to 633.6)   | 15256<br>(13900 to 16106) | 12.3<br>(11.4 to 12.9) | 300854<br>(284468 to 313473) | 282.9<br>(270.3 to 294.1) | 39983<br>(26635 to 57704)          | 37 (24.4 to 54)        | 340837<br>(319900 to 362996)           | 319.9<br>(302.3 to 340.9) |
|                             | Female | 41846<br>(40409 to 42896)    | 98.2<br>(95.4 to 100.5) | 433247<br>(397995 to 478254) | 987.7<br>(921.9 to 1069.6) | 17339<br>(16441 to 17806) | 36 (34.6 to 36.8)      | 394955<br>(382888 to 402198) | 953.8<br>(931.2 to 970.9) | 30670<br>(21633 to 41952)          | 71.4<br>(50.1 to 97.3) | 425626<br>(411144 to 439501)           | 1025.2<br>(994.6 to 1056.8) | 52730<br>(41949 to 65672)    | 94.3<br>(74.3 to 118.8) | 570689<br>(479014 to 682198) | 1000.3<br>(829.8 to 1217.1) | 15162<br>(13811 to 16011) | 22.6 (21 to 23.6)      | 299110<br>(282746 to 311743) | 542.8<br>(519.4 to 564.3) | 39743<br>(26491 to 57420)          | 71 (46.8 to 103.9)     | 338853<br>(317922 to 360908)           | 613.8<br>(579.9 to 654)   |
|                             | Male   | 220<br>(208 to 232)          | 0.6 (0.6 to 0.6)        | 1979<br>(1790 to 2206)       | 5.3 (4.8 to 5.9)           | 93 (89 to 96)             | 0.3 (0.2 to 0.3)       | 1943<br>(1883 to 2000)       | 5.3 (5.1 to 5.4)          | 183<br>(131 to 246)                | 0.5 (0.3 to 0.7)       | 2126<br>(2040 to 2214)                 | 5.8 (5.6 to 6)              | 280<br>(219 to 354)          | 0.5 (0.4 to 0.6)        | 2704<br>(2210 to 3279)       | 4.9 (4 to 6)                | 94 (86 to 100)            | 0.2 (0.2 to 0.2)       | 1745<br>(1641 to 1841)       | 3.3 (3.1 to 3.5)          | 240<br>(162 to 337)                | 0.4 (0.3 to 0.6)       | 1984<br>(1850 to 2136)                 | 3.7 (3.5 to 4)            |
| United Republic of Tanzania | Both   | 1081<br>(874 to 1300)        | 9.6 (7.9 to 11.4)       | 7067<br>(5886 to 8392)       | 59.2 (50 to 69.7)          | 863<br>(705 to 1033)      | 8.4 (7 to 9.9)         | 25475<br>(20354 to 31056)    | 205.2<br>(166.1 to 246.3) | 608<br>(421 to 833)                | 5.2 (3.6 to 7)         | 26083<br>(20827 to 31845)              | 210.4<br>(170.2 to 253.3)   | 3728<br>(2886 to 4627)       | 13.8<br>(11.1 to 16.8)  | 24976<br>(19663 to 30749)    | 87.6<br>(71.1 to 105.1)     | 2602<br>(2073 to 3165)    | 10.7<br>(8.7 to 12.7)  | 76933<br>(59179 to 96781)    | 261.8<br>(205.7 to 322.4) | 2126<br>(1399 to 3019)             | 7.5 (5.1 to 10.5)      | 79060<br>(60868 to 99360)              | 269.4<br>(211.3 to 331.2) |
|                             | Female | 942<br>(749 to 1153)         | 15.6<br>(12.5 to 18.7)  | 6396<br>(5267 to 7599)       | 101.8<br>(84.7 to 119.7)   | 734<br>(589 to 887)       | 13.2<br>(10.6 to 15.7) | 22503<br>(17738 to 27892)    | 341.9<br>(272.8 to 418.8) | 534<br>(365 to 736)                | 8.5 (5.9 to 11.6)      | 23038<br>(18177 to 28516)              | 350.5<br>(279.4 to 429.1)   | 3452<br>(2638 to 4324)       | 23.9<br>(18.7 to 29.2)  | 23501<br>(18336 to 29187)    | 155.8<br>(124.8 to 188.6)   | 2363<br>(1862 to 2904)    | 17.8<br>(14.2 to 21.4) | 71548<br>(54115 to 90431)    | 458.7<br>(352.3 to 570.3) | 1971<br>(1290 to 2831)             | 13.1<br>(8.8 to 18.4)  | 73519<br>(55516 to 92832)              | 471.8<br>(362.8 to 588.2) |
|                             | Male   | 139 (90 to 209)              | 3.1 (2 to 4.6)          | 671<br>(453 to 997)          | 13.5<br>(9.4 to 19.3)      | 129 (83 to 192)           | 3.1 (2 to 4.6)         | 2972<br>(1936 to 4565)       | 58.3<br>(38.1 to 87.2)    | 74 (41 to 123)                     | 1.5 (0.9 to 2.4)       | 3046<br>(1983 to 4671)                 | 59.8<br>(39.2 to 89.8)      | 276<br>(167 to 440)          | 2.7 (1.7 to 4.3)        | 1475<br>(924 to 2268)        | 13.5<br>(8.7 to 20.3)       | 238<br>(142 to 373)       | 2.6 (1.6 to 4)         | 5386<br>(3194 to 8683)       | 47.8<br>(28.7 to 74.9)    | 155 (82 to 267)                    | 1.5 (0.8 to 2.5)       | 5541<br>(3281 to 8949)                 | 49.2<br>(29.6 to 77.1)    |
| United States of America    | Both   | 190935<br>(184205 to 195770) | 63.6<br>(61.5 to 65.2)  | 197374<br>(184923 to 213541) | 648.7<br>(611.8 to 697.2)  | 48212<br>(45756 to 49506) | 15.6<br>(14.9 to 16)   | 119957<br>(116578 to 122205) | 411.4<br>(400.5 to 418.6) | 139405<br>(98758 to 187772)        | 46.1<br>(32.7 to 62.5) | 133898<br>(128759 to 139754)           | 457.5<br>(440.9 to 477.5)   | 254486<br>(210821 to 308184) | 50.2<br>(41.2 to 61.1)  | 281791<br>(239871 to 327868) | 543.2<br>(460.5 to 634.4)   | 55021<br>(51008 to 57900) | 10.1<br>(9.5 to 10.5)  | 121243<br>(115703 to 126182) | 246.6<br>(236.1 to 256.3) | 190962<br>(128770 to 267492)       | 37.5<br>(25.1 to 52.6) | 140339<br>(131438 to 149902)           | 284.1<br>(267.1 to 303.3) |

|                                    |        | 1990                         |                           |                                 |                            |                           |                        |                                 |                              |                                    |                         |                                        |                              | 2019                         |                         |                                 |                             |                           |                        |                                 |                           |                                    |                        |                                        |                            |
|------------------------------------|--------|------------------------------|---------------------------|---------------------------------|----------------------------|---------------------------|------------------------|---------------------------------|------------------------------|------------------------------------|-------------------------|----------------------------------------|------------------------------|------------------------------|-------------------------|---------------------------------|-----------------------------|---------------------------|------------------------|---------------------------------|---------------------------|------------------------------------|------------------------|----------------------------------------|----------------------------|
|                                    |        | Incidence                    |                           | Prevalence                      |                            | Deaths                    |                        | YLLs (Years of Life Lost)       |                              | YLDs (Years Lived with Disability) |                         | DALYs (Disability-Adjusted Life Years) |                              | Incidence                    |                         | Prevalence                      |                             | Deaths                    |                        | YLLs (Years of Life Lost)       |                           | YLDs (Years Lived with Disability) |                        | DALYs (Disability-Adjusted Life Years) |                            |
| Location                           | Sex    | Number                       | Rate                      | Number                          | Rate                       | Number                    | Rate                   | Number                          | Rate                         | Number                             | Rate                    | Number                                 | Rate                         | Number                       | Rate                    | Number                          | Rate                        | Number                    | Rate                   | Number                          | Rate                      | Number                             | Rate                   | Number                                 | Rate                       |
|                                    | Female | 189273<br>(182651 to 194086) | 115.8<br>(112.3 to 118.5) | 1956809<br>(1833565 to 2117207) | 1168.1<br>(1105 to 1247.8) | 47836<br>(45387 to 49122) | 27.7<br>(26.5 to 28.3) | 1190741<br>(1156956 to 1213211) | 761.8<br>(743.9 to 775.1)    | 137983<br>(97735 to 185806)        | 83.5<br>(59.1 to 112.8) | 1328724<br>(1277529 to 1387097)        | 845.3<br>(816 to 881.2)      | 251531<br>(207355 to 305346) | 94.2<br>(77.4 to 115.1) | 2787997<br>(2370169 to 3247109) | 1013.7<br>(857.9 to 1188.9) | 54402<br>(50420 to 57271) | 18.4<br>(17.3 to 19.2) | 1199215<br>(1144039 to 1248457) | 466.3<br>(446.5 to 484.8) | 188455<br>(126777 to 264364)       | 70.1<br>(46.8 to 98.5) | 1387670<br>(1300006 to 1483612)        | 536.4<br>(504.9 to 572.8)  |
|                                    | Male   | 1663<br>(1584 to 1748)       | 1.2 (1.2 to 1.3)          | 16931<br>(15592 to 18672)       | 12.7<br>(11.7 to 14)       | 376<br>(361 to 392)       | 0.3 (0.3 to 0.3)       | 8837<br>(8527 to 9195)          | 6.6 (6.4 to 6.9)             | 1422<br>(1023 to 1893)             | 1.1 (0.8 to 1.4)        | 10259<br>(9666 to 10880)               | 7.7 (7.2 to 8.2)             | 2956<br>(2375 to 3634)       | 1.2 (1 to 1.5)          | 29913<br>(25215 to 35846)       | 12.2<br>(10.3 to 14.6)      | 619<br>(574 to 662)       | 0.2 (0.2 to 0.3)       | 13215<br>(12364 to 14024)       | 5.4 (5.1 to 5.7)          | 2507<br>(1689 to 3484)             | 1 (0.7 to 1.4)         | 15722<br>(14495 to 17073)              | 6.4 (5.9 to 7)             |
| United States Virgin Islands       | Both   | 33 (27 to 39)                | 35.3<br>(29.4 to 41.5)    | 269<br>(225 to 317)             | 280.3<br>(237.7 to 328.1)  | 15 (12 to 17)             | 17 (14.4 to 19.8)      | 433<br>(358 to 512)             | 442.1<br>(366.9 to 520.1)    | 20 (13 to 28)                      | 20.7<br>(14.1 to 28.7)  | 453<br>(374 to 536)                    | 462.9<br>(384.5 to 543.6)    | 70 (56 to 85)                | 41.9<br>(33.2 to 52.1)  | 587<br>(483 to 706)             | 347.4<br>(281 to 425.3)     | 28 (23 to 33)             | 16.5<br>(13.4 to 19.9) | 652<br>(520 to 800)             | 400.3<br>(313.9 to 496.5) | 42 (28 to 59)                      | 25.2<br>(16.8 to 35.8) | 694<br>(550 to 849)                    | 425.4<br>(332.3 to 527.9)  |
|                                    | Female | 33 (27 to 39)                | 64.7<br>(53.7 to 76.2)    | 266<br>(223 to 314)             | 519.6<br>(440.3 to 609.8)  | 14 (12 to 17)             | 30.2<br>(25.6 to 35.2) | 424<br>(349 to 503)             | 812.7<br>(673.5 to 958)      | 19 (13 to 27)                      | 38.2<br>(25.8 to 53.2)  | 444<br>(367 to 525)                    | 850.9<br>(706 to 1003.2)     | 68 (55 to 84)                | 74.5<br>(58.7 to 93.1)  | 576<br>(472 to 697)             | 624.8<br>(503 to 770)       | 27 (22 to 32)             | 28.1<br>(22.7 to 34.1) | 629<br>(500 to 772)             | 710.1<br>(551.1 to 882.7) | 41 (28 to 58)                      | 44.8<br>(29.6 to 64.2) | 671<br>(531 to 824)                    | 754.9<br>(586.2 to 941.9)  |
|                                    | Male   | 1 (0 to 1)                   | 1.4 (1 to 1.8)            | 3 (2 to 4)                      | 7.7 (5.9 to 10.2)          | 0 (0 to 0)                | 1 (0.8 to 1.4)         | 9 (7 to 12)                     | 21.4<br>(15.9 to 28.1)       | 0 (0 to 0)                         | 0.8 (0.5 to 1.2)        | 9 (7 to 12)                            | 22.2<br>(16.5 to 29.1)       | 2 (1 to 2)                   | 2.2 (1.6 to 3)          | 11 (7 to 15)                    | 13.3<br>(9.3 to 18.2)       | 1 (1 to 1)                | 1.4 (1 to 1.8)         | 22 (16 to 30)                   | 28.6<br>(20.7 to 37.8)    | 1 (1 to 2)                         | 1.3 (0.8 to 2)         | 23 (17 to 32)                          | 29.9<br>(21.6 to 39.5)     |
| Uruguay                            | Both   | 1418<br>(1325 to 1510)       | 38.9<br>(36.3 to 41.4)    | 12591<br>(11552 to 13844)       | 343<br>(316.5 to 374.4)    | 807<br>(764 to 842)       | 21.6<br>(20.5 to 22.6) | 20425<br>(19548 to 21238)       | 569.9<br>(545.7 to 592.7)    | 952<br>(668 to 1298)               | 26.1<br>(18.3 to 35.7)  | 21376<br>(20437 to 22303)              | 596<br>(569.2 to 621.9)      | 1959<br>(1519 to 2470)       | 40.3<br>(31.1 to 51.2)  | 18858<br>(15795 to 22687)       | 387.3<br>(318.3 to 470.9)   | 936<br>(849 to 1018)      | 17.3<br>(15.8 to 18.7) | 19767<br>(18265 to 21296)       | 417.7<br>(388.1 to 451.5) | 1374<br>(925 to 1984)              | 28.5<br>(18.8 to 41.3) | 21141<br>(19489 to 22931)              | 446.2<br>(411.6 to 486.6)  |
|                                    | Female | 1408<br>(1316 to 1500)       | 71.1<br>(66.3 to 75.9)    | 12516<br>(11484 to 13770)       | 627.5<br>(579.2 to 682.7)  | 800<br>(757 to 836)       | 38.5<br>(36.6 to 40.1) | 20268<br>(19396 to 21077)       | 1055.3<br>(1010.9 to 1097.9) | 944<br>(662 to 1290)               | 47.8<br>(33.4 to 65.6)  | 21212<br>(20268 to 22138)              | 1103.1<br>(1053.7 to 1150.8) | 1942<br>(1505 to 2450)       | 72.6<br>(55.8 to 92.6)  | 18730<br>(15694 to 22546)       | 700<br>(572.5 to 854.7)     | 926<br>(840 to 1008)      | 30 (27.5 to 32.3)      | 19567<br>(18088 to 21081)       | 759<br>(704.4 to 821.7)   | 1361<br>(916 to 1963)              | 51.5<br>(33.9 to 75)   | 20928<br>(19284 to 22720)              | 810.5<br>(746.2 to 884.6)  |
|                                    | Male   | 10 (9 to 12)                 | 0.6 (0.5 to 0.7)          | 75 (64 to 89)                   | 4.5 (3.9 to 5.3)           | 7 (6 to 8)                | 0.4 (0.4 to 0.5)       | 157<br>(134 to 180)             | 9.4 (8 to 10.7)              | 7 (5 to 10)                        | 0.4 (0.3 to 0.6)        | 164<br>(139 to 189)                    | 9.8 (8.4 to 11.2)            | 17 (12 to 22)                | 0.8 (0.5 to 1)          | 129 (98 to 169)                 | 5.9 (4.5 to 7.6)            | 10 (8 to 12)              | 0.4 (0.3 to 0.5)       | 200<br>(163 to 242)             | 9.3 (7.6 to 11.1)         | 13 (8 to 19)                       | 0.6 (0.4 to 0.9)       | 213<br>(173 to 258)                    | 9.8 (8 to 11.8)            |
| Uzbekistan                         | Both   | 1651<br>(1539 to 1769)       | 13.4<br>(12.5 to 14.3)    | 16116<br>(14609 to 17770)       | 133.9<br>(120.6 to 148.6)  | 914<br>(860 to 969)       | 7.8 (7.3 to 8.2)       | 29491<br>(27620 to 31344)       | 232.8<br>(218.6 to 247)      | 1129<br>(782 to 1545)              | 9.2 (6.4 to 12.6)       | 30620<br>(28699 to 32538)              | 242<br>(227.4 to 256.6)      | 5480<br>(4449 to 6676)       | 20.2<br>(16.6 to 24.2)  | 48418<br>(40270 to 58105)       | 182<br>(155.3 to 214.4)     | 2253<br>(1845 to 2704)    | 9.7 (8.2 to 11.5)      | 77488<br>(63018 to 93686)       | 275.4<br>(226.2 to 328.6) | 3645<br>(2418 to 5257)             | 13.4 (9 to 19)         | 81133<br>(66329 to 98398)              | 288.8<br>(238.3 to 345.8)  |
|                                    | Female | 1648<br>(1536 to 1765)       | 24.5<br>(22.9 to 26.2)    | 16077<br>(14569 to 17731)       | 240.8<br>(217.6 to 266.2)  | 913<br>(858 to 968)       | 13.8 (13 to 14.7)      | 29432<br>(27563 to 31286)       | 433<br>(406.6 to 459.9)      | 1126<br>(780 to 1541)              | 16.7<br>(11.6 to 22.9)  | 30558<br>(28640 to 32476)              | 449.7<br>(422 to 477.9)      | 5460<br>(4434 to 6653)       | 37.3<br>(30.6 to 44.8)  | 48253<br>(40106 to 57940)       | 334.9<br>(284.1 to 396)     | 2244<br>(1838 to 2693)    | 17.4<br>(14.6 to 20.6) | 77193<br>(62744 to 93342)       | 511.2<br>(419.5 to 611.2) | 3630<br>(2407 to 5235)             | 24.7<br>(16.6 to 35.3) | 80823<br>(66069 to 98034)              | 536<br>(441.4 to 643.2)    |
|                                    | Male   | 3 (3 to 4)                   | 0.1 (0 to 0.1)            | 39 (32 to 48)                   | 0.7 (0.6 to 0.9)           | 2 (2 to 2)                | 0 (0 to 0)             | 59 (55 to 64)                   | 0.9 (0.8 to 1)               | 3 (2 to 4)                         | 0 (0 to 0.1)            | 62 (58 to 67)                          | 1 (0.9 to 1.1)               | 20 (16 to 25)                | 0.2 (0.2 to 0.3)        | 165<br>(131 to 203)             | 1.6 (1.3 to 1.9)            | 10 (8 to 12)              | 0.1 (0.1 to 0.1)       | 295<br>(235 to 358)             | 2.8 (2.2 to 3.3)          | 15 (10 to 22)                      | 0.2 (0.1 to 0.2)       | 310<br>(248 to 379)                    | 2.9 (2.4 to 3.5)           |
| Vanuatu                            | Both   | 8 (5 to 11)                  | 9.9 (6.5 to 13.7)         | 63 (47 to 83)                   | 81.1<br>(61.9 to 103.7)    | 5 (4 to 8)                | 7.7 (5 to 10.6)        | 189<br>(122 to 270)             | 223.9<br>(144.6 to 314.4)    | 5 (3 to 7)                         | 6 (3.6 to 9.1)          | 193<br>(126 to 277)                    | 229.9<br>(149.6 to 322.3)    | 37 (24 to 55)                | 18.6<br>(12.1 to 27.5)  | 264<br>(183 to 378)             | 130.1<br>(91.9 to 182.4)    | 24 (16 to 35)             | 13.2<br>(8.6 to 19)    | 804<br>(511 to 1213)            | 388.2<br>(252.4 to 579.5) | 21 (12 to 34)                      | 10.5<br>(6.1 to 16.4)  | 825<br>(523 to 1242)                   | 398.7<br>(259.3 to 592.7)  |
|                                    | Female | 8 (5 to 11)                  | 21.4<br>(13.8 to 29.9)    | 63 (46 to 83)                   | 177.1<br>(134.8 to 226)    | 5 (3 to 8)                | 16.8<br>(10.9 to 23.3) | 187<br>(120 to 268)             | 482.9<br>(309 to 680.9)      | 5 (3 to 7)                         | 13 (7.8 to 19.8)        | 191<br>(124 to 276)                    | 495.9<br>(319.5 to 696)      | 36 (24 to 55)                | 38.2 (25 to 56.7)       | 262<br>(182 to 376)             | 267.7<br>(188.6 to 375.3)   | 24 (15 to 35)             | 27.2<br>(17.8 to 39.3) | 797<br>(506 to 1205)            | 796<br>(514.9 to 1188.3)  | 21 (12 to 33)                      | 21.6<br>(12.5 to 33.7) | 819<br>(516 to 1235)                   | 817.6<br>(527.9 to 1215.3) |
|                                    | Male   | 0 (0 to 0)                   | 0.2 (0.1 to 0.4)          | 1 (0 to 1)                      | 1.4 (0.9 to 2.1)           | 0 (0 to 0)                | 0.2 (0.1 to 0.4)       | 2 (1 to 3)                      | 4.9 (2.7 to 8.6)             | 0 (0 to 0)                         | 0.1 (0.1 to 0.3)        | 2 (1 to 3)                             | 5 (2.8 to 8.8)               | 0 (0 to 1)                   | 0.3 (0.2 to 0.6)        | 2 (1 to 3)                      | 1.9 (1.3 to 3)              | 0 (0 to 0)                | 0.3 (0.2 to 0.5)       | 7 (4 to 11)                     | 6.9 (4 to 11.3)           | 0 (0 to 0)                         | 0.2 (0.1 to 0.4)       | 7 (4 to 11)                            | 7.1 (4.2 to 11.7)          |
| Venezuela (Bolivarian Republic of) | Both   | 1685<br>(1583 to 1801)       | 15 (14.1 to 16)           | 13367<br>(12479 to 14363)       | 118.4<br>(110.4 to 127.2)  | 806<br>(764 to 846)       | 7.7 (7.3 to 8.1)       | 26028<br>(24720 to 27451)       | 220.5<br>(209.3 to 232.1)    | 984<br>(697 to 1324)               | 8.7 (6.2 to 11.7)       | 27012<br>(25687 to 28443)              | 229.2<br>(217.3 to 241.3)    | 8475<br>(6289 to 11298)      | 27.9<br>(20.8 to 37)    | 71150<br>(54208 to 93200)       | 233.4<br>(179.2 to 303.9)   | 2811<br>(2128 to 3671)    | 9.5 (7.2 to 12.4)      | 81498<br>(60603 to 109596)      | 265.3<br>(197.8 to 355.4) | 5073<br>(3283 to 7511)             | 16.7<br>(10.8 to 24.6) | 86571<br>(64614 to 116284)             | 282<br>(211.6 to 377.8)    |

|          |        | 1990                   |                        |                           |                           |                        |                        |                              |                           |                                    |                        |                                        |                           | 2019                      |                        |                              |                           |                          |                        |                              |                            |                                    |                        |                                        |                            |
|----------|--------|------------------------|------------------------|---------------------------|---------------------------|------------------------|------------------------|------------------------------|---------------------------|------------------------------------|------------------------|----------------------------------------|---------------------------|---------------------------|------------------------|------------------------------|---------------------------|--------------------------|------------------------|------------------------------|----------------------------|------------------------------------|------------------------|----------------------------------------|----------------------------|
|          |        | Incidence              |                        | Prevalence                |                           | Deaths                 |                        | YLLs (Years of Life Lost)    |                           | YLDs (Years Lived with Disability) |                        | DALYs (Disability-Adjusted Life Years) |                           | Incidence                 |                        | Prevalence                   |                           | Deaths                   |                        | YLLs (Years of Life Lost)    |                            | YLDs (Years Lived with Disability) |                        | DALYs (Disability-Adjusted Life Years) |                            |
| Location | Sex    | Number                 | Rate                   | Number                    | Rate                      | Number                 | Rate                   | Number                       | Rate                      | Number                             | Rate                   | Number                                 | Rate                      | Number                    | Rate                   | Number                       | Rate                      | Number                   | Rate                   | Number                       | Rate                       | Number                             | Rate                   | Number                                 | Rate                       |
|          | Female | 1661<br>(1560 to 1775) | 28.4<br>(26.7 to 30.4) | 13235<br>(12349 to 14217) | 225.7<br>(210.5 to 242.8) | 787<br>(747 to 829)    | 14.3<br>(13.5 to 15)   | 25597<br>(24280 to 26992)    | 419.1<br>(397.8 to 441.7) | 970<br>(685 to 1309)               | 16.4<br>(11.7 to 22.1) | 26567<br>(25239 to 27987)              | 435.5<br>(412.9 to 459)   | 8428<br>(6255 to 11241)   | 53<br>(39.4 to 70.5)   | 70847<br>(54004 to 92831)    | 445.2<br>(341.1 to 580.6) | 2783<br>(2109 to 3641)   | 17.7<br>(13.4 to 23.1) | 80863<br>(60097 to 108795)   | 506<br>(376.5 to 679.3)    | 5043<br>(3262 to 7464)             | 31.7<br>(20.5 to 46.9) | 85906<br>(64107 to 115429)             | 537.7<br>(402.1 to 721.9)  |
|          | Male   | 24<br>(21 to 27)       | 0.5<br>(0.5 to 0.6)    | 132<br>(114 to 151)       | 2.8<br>(2.4 to 3.2)       | 18<br>(16 to 20)       | 0.4<br>(0.4 to 0.5)    | 431<br>(389 to 472)          | 9<br>(8.1 to 9.9)         | 14<br>(10 to 19)                   | 0.3<br>(0.2 to 0.4)    | 445<br>(401 to 488)                    | 9.3<br>(8.4 to 10.3)      | 46<br>(34 to 64)          | 0.3<br>(0.2 to 0.5)    | 303<br>(215 to 417)          | 2.2<br>(1.5 to 3)         | 27<br>(20 to 37)         | 0.2<br>(0.2 to 0.3)    | 635<br>(457 to 859)          | 4.6<br>(3.3 to 6.2)        | 30<br>(19 to 45)                   | 0.2<br>(0.1 to 0.3)    | 665<br>(482 to 902)                    | 4.8<br>(3.5 to 6.4)        |
| Viet Nam | Both   | 6300<br>(4898 to 7874) | 15.1<br>(11.8 to 18.7) | 49666<br>(40005 to 60034) | 118.4<br>(95.9 to 142.6)  | 4308<br>(3426 to 5297) | 10.7<br>(8.6 to 13.1)  | 131958<br>(102470 to 166066) | 309.6<br>(241.9 to 388)   | 3820<br>(2492 to 5380)             | 9.1<br>(5.9 to 12.6)   | 135778<br>(105984 to 171010)           | 318.7<br>(248.6 to 398.8) | 27821<br>(20840 to 36275) | 26.7<br>(20.2 to 34.4) | 236079<br>(184934 to 302165) | 225.2<br>(177.8 to 283.5) | 11969<br>(9140 to 15527) | 12.4<br>(9.4 to 16)    | 359492<br>(269517 to 468131) | 339.1<br>(256.5 to 439.2)  | 17975<br>(11372 to 26612)          | 17.1<br>(11.1 to 25)   | 377467<br>(282930 to 491607)           | 356.2<br>(268.5 to 462)    |
|          | Female | 6088<br>(4706 to 7640) | 25.8<br>(20.1 to 32.3) | 48643<br>(39065 to 58944) | 206<br>(165.2 to 249.3)   | 4125<br>(3267 to 5098) | 17.7<br>(14.1 to 21.9) | 127977<br>(98682 to 161215)  | 539<br>(418.5 to 678.5)   | 3701<br>(2408 to 5242)             | 15.6<br>(10.1 to 22)   | 131678<br>(102226 to 165862)           | 554.6<br>(431.6 to 696.8) | 27432<br>(20526 to 35854) | 48.6<br>(36.6 to 63)   | 233624<br>(182907 to 298745) | 413.6<br>(323.8 to 523.8) | 11732<br>(8927 to 15223) | 21.5<br>(16.4 to 27.8) | 354024<br>(265202 to 461930) | 622.1<br>(468.1 to 806.1)  | 17719<br>(11182 to 26176)          | 31.3<br>(20.1 to 46.1) | 371742<br>(279096 to 485149)           | 653.4<br>(492.2 to 848.6)  |
|          | Male   | 212<br>(150 to 289)    | 1.5<br>(1 to 2.1)      | 1023<br>(734 to 1405)     | 6.2<br>(4.5 to 8.3)       | 183<br>(129 to 249)    | 1.4<br>(1 to 2)        | 3981<br>(2856 to 5400)       | 25.1<br>(18.1 to 33.9)    | 119<br>(74 to 178)                 | 0.8<br>(0.5 to 1.2)    | 4100<br>(2940 to 5563)                 | 25.9<br>(18.7 to 34.9)    | 389<br>(272 to 561)       | 1.1<br>(0.8 to 1.6)    | 2455<br>(1741 to 3592)       | 6.2<br>(4.4 to 9)         | 237<br>(168 to 334)      | 0.8<br>(0.5 to 1.1)    | 5469<br>(3880 to 7796)       | 13.9<br>(9.9 to 19.6)      | 256<br>(156 to 405)                | 0.7<br>(0.4 to 1.1)    | 5725<br>(4069 to 8203)                 | 14.6<br>(10.4 to 20.6)     |
| Yemen    | Both   | 391<br>(242 to 637)    | 6.6<br>(4.1 to 10.9)   | 3248<br>(2343 to 4744)    | 57.8<br>(42.9 to 81.2)    | 271<br>(168 to 442)    | 4.9<br>(3 to 8.1)      | 9366<br>(5802 to 15040)      | 148.9<br>(93 to 243.5)    | 244<br>(141 to 410)                | 4.2<br>(2.4 to 7)      | 9609<br>(5967 to 15450)                | 153.1<br>(95.2 to 249.6)  | 2032<br>(1446 to 2836)    | 11.7<br>(8.6 to 16)    | 16022<br>(11761 to 21908)    | 92.3<br>(70.8 to 122.1)   | 1107<br>(810 to 1539)    | 7<br>(5.2 to 9.5)      | 39272<br>(27942 to 55702)    | 215.8<br>(157.2 to 302.2)  | 1251<br>(755 to 1946)              | 7.1<br>(4.4 to 10.8)   | 40523<br>(28761 to 57471)              | 222.9<br>(162.6 to 311.8)  |
|          | Female | 378<br>(229 to 620)    | 12.6<br>(7.6 to 21)    | 3168<br>(2271 to 4651)    | 110<br>(80.1 to 158.4)    | 260<br>(157 to 428)    | 9.1<br>(5.4 to 15.2)   | 9050<br>(5495 to 14723)      | 289.6<br>(176.5 to 476.3) | 235<br>(133 to 401)                | 7.9<br>(4.5 to 13.6)   | 9285<br>(5633 to 15062)                | 297.5<br>(181.5 to 490.7) | 2001<br>(1418 to 2805)    | 22.7<br>(16.6 to 31.3) | 15809<br>(11583 to 21685)    | 180.2<br>(137.6 to 239.9) | 1085<br>(790 to 1506)    | 13.4<br>(10 to 18.4)   | 38639<br>(27428 to 54742)    | 420.3<br>(306.3 to 587.2)  | 1230<br>(742 to 1918)              | 13.8<br>(8.6 to 21.1)  | 39870<br>(28352 to 56502)              | 434.1<br>(314.8 to 605.8)  |
|          | Male   | 13<br>(6 to 23)        | 0.6<br>(0.3 to 1)      | 79<br>(45 to 131)         | 3.2<br>(1.9 to 5)         | 11<br>(5 to 19)        | 0.5<br>(0.3 to 0.9)    | 316<br>(158 to 571)          | 11.8<br>(6 to 21)         | 8<br>(4 to 15)                     | 0.3<br>(0.2 to 0.6)    | 324<br>(163 to 584)                    | 12.2<br>(6.2 to 21.6)     | 31<br>(19 to 50)          | 0.5<br>(0.3 to 0.7)    | 212<br>(142 to 327)          | 3<br>(2.1 to 4.5)         | 22<br>(14 to 35)         | 0.4<br>(0.2 to 0.6)    | 632<br>(389 to 1023)         | 8.4<br>(5.2 to 13.5)       | 21<br>(12 to 35)                   | 0.3<br>(0.2 to 0.5)    | 653<br>(400 to 1054)                   | 8.7<br>(5.4 to 14)         |
| Zambia   | Both   | 399<br>(316 to 503)    | 12.1<br>(9.8 to 14.9)  | 2468<br>(2003 to 3064)    | 71.1<br>(59.2 to 86.7)    | 313<br>(250 to 391)    | 10.4<br>(8.4 to 12.7)  | 10535<br>(8193 to 13420)     | 288.1<br>(228.2 to 361.6) | 222<br>(147 to 313)                | 6.5<br>(4.4 to 9)      | 10756<br>(8348 to 13712)               | 294.5<br>(233 to 369.9)   | 1256<br>(915 to 1673)     | 15.6<br>(11.7 to 20.6) | 8682<br>(6457 to 11335)      | 100.8<br>(77.8 to 130.3)  | 812<br>(600 to 1074)     | 11.6<br>(9 to 14.9)    | 26894<br>(19120 to 36160)    | 300.1<br>(219.7 to 398)    | 734<br>(454 to 1106)               | 8.6<br>(5.6 to 12.6)   | 27629<br>(19665 to 37182)              | 308.8<br>(226.8 to 410.4)  |
|          | Female | 359<br>(278 to 457)    | 21.4<br>(17.1 to 26.8) | 2286<br>(1831 to 2855)    | 131.4<br>(109 to 160.3)   | 275<br>(215 to 347)    | 17.9<br>(14.4 to 22.1) | 9651<br>(7353 to 12507)      | 517.7<br>(405.3 to 654.1) | 201<br>(131 to 285)                | 11.5<br>(7.7 to 16.3)  | 9851<br>(7509 to 12699)                | 529.2<br>(413.7 to 667.3) | 1171<br>(843 to 1561)     | 27.3<br>(20.3 to 36.7) | 8231<br>(6083 to 10742)      | 183.3<br>(139.1 to 237)   | 741<br>(543 to 988)      | 19.5<br>(14.8 to 25.7) | 25174<br>(17615 to 33964)    | 538.1<br>(390.3 to 721.4)  | 686<br>(427 to 1037)               | 15.3<br>(9.8 to 22.7)  | 25860<br>(18147 to 34863)              | 553.4<br>(400.8 to 743.5)  |
|          | Male   | 40<br>(27 to 60)       | 3.2<br>(2 to 4.6)      | 182<br>(127 to 263)       | 13.1<br>(9.3 to 18.6)     | 38<br>(25 to 58)       | 3.3<br>(2.1 to 4.8)    | 884<br>(580 to 1318)         | 61.9<br>(40.5 to 93.2)    | 21<br>(12 to 35)                   | 1.5<br>(0.8 to 2.5)    | 905<br>(594 to 1350)                   | 63.5<br>(41.5 to 95.3)    | 85<br>(51 to 133)         | 3.2<br>(1.9 to 5.1)    | 451<br>(285 to 693)          | 15.1<br>(9.7 to 23)       | 71<br>(42 to 113)        | 2.9<br>(1.8 to 4.7)    | 1720<br>(1030 to 2653)       | 55.9<br>(33.2 to 88.4)     | 49<br>(26 to 81)                   | 1.7<br>(0.9 to 2.8)    | 1769<br>(1063 to 2736)                 | 57.6<br>(34.4 to 90.8)     |
| Zimbabwe | Both   | 591<br>(484 to 706)    | 13.1<br>(10.8 to 15.6) | 4201<br>(3516 to 4910)    | 91.4<br>(77.6 to 106.3)   | 394<br>(324 to 471)    | 9.6<br>(8 to 11.4)     | 12356<br>(10039 to 15044)    | 255.5<br>(209.3 to 308)   | 345<br>(231 to 477)                | 7.4<br>(5.1 to 10.2)   | 12700<br>(10352 to 15459)              | 262.9<br>(215.5 to 316.1) | 1754<br>(1203 to 2432)    | 21.6<br>(15.2 to 29.6) | 11886<br>(8599 to 16025)     | 142.5<br>(105.4 to 187.5) | 1161<br>(803 to 1614)    | 15.8<br>(11.1 to 21.8) | 37527<br>(25457 to 53306)    | 432.1<br>(296.3 to 604.7)  | 993<br>(618 to 1513)               | 11.9<br>(7.4 to 17.7)  | 38520<br>(26126 to 54815)              | 444<br>(304.2 to 622.1)    |
|          | Female | 583<br>(476 to 698)    | 24.8<br>(20.4 to 29.4) | 4151<br>(3472 to 4855)    | 174<br>(146.5 to 203.3)   | 388<br>(318 to 466)    | 17.7<br>(14.7 to 21.1) | 12179<br>(9883 to 14859)     | 489.5<br>(398 to 592.7)   | 340<br>(227 to 471)                | 14.1<br>(9.6 to 19.5)  | 12518<br>(10192 to 15266)              | 503.6<br>(409.5 to 609.4) | 1740<br>(1191 to 2413)    | 37.6<br>(26.3 to 51.7) | 11794<br>(8521 to 15933)     | 249.3<br>(182.8 to 330.7) | 1150<br>(793 to 1600)    | 26.9<br>(18.7 to 37.2) | 37161<br>(25154 to 52942)    | 761.5<br>(520.2 to 1074.1) | 983<br>(611 to 1497)               | 20.8<br>(12.9 to 31)   | 38145<br>(25829 to 54398)              | 782.3<br>(533.1 to 1101.4) |
|          | Male   | 8<br>(5 to 10)         | 0.4<br>(0.3 to 0.5)    | 50<br>(38 to 64)          | 2.4<br>(1.9 to 3)         | 6<br>(4 to 8)          | 0.3<br>(0.2 to 0.4)    | 177<br>(128 to 236)          | 7.6<br>(5.5 to 10.1)      | 5<br>(3 to 8)                      | 0.2<br>(0.1 to 0.4)    | 182<br>(131 to 242)                    | 7.9<br>(5.7 to 10.4)      | 15<br>(10 to 21)          | 0.4<br>(0.3 to 0.6)    | 92<br>(64 to 128)            | 2.7<br>(2 to 3.5)         | 11<br>(8 to 16)          | 0.4<br>(0.3 to 0.5)    | 365<br>(243 to 538)          | 9.7<br>(6.6 to 13.7)       | 9<br>(6 to 15)                     | 0.3<br>(0.2 to 0.4)    | 375<br>(249 to 551)                    | 10<br>(6.8 to 14.1)        |

Supplementary table 2. The regional, socio-demographic index (SDI) quintiles, and national trend of age-standardized rates of epidemiologic indices attributed to various breast cancer risk factors for females, in 1990 and 2019.

| Location                     | Risk factor                 | 1990              |                           |                                    |                                        | 2019             |                           |                                    |                                        |
|------------------------------|-----------------------------|-------------------|---------------------------|------------------------------------|----------------------------------------|------------------|---------------------------|------------------------------------|----------------------------------------|
|                              |                             | Deaths            | YLLs (Years of Life Lost) | YLDs (Years Lived with Disability) | DALYs (Disability-Adjusted Life Years) | Deaths           | YLLs (Years of Life Lost) | YLDs (Years Lived with Disability) | DALYs (Disability-Adjusted Life Years) |
| <b>WHO regions</b>           |                             |                   |                           |                                    |                                        |                  |                           |                                    |                                        |
| African Region               | All risk factors            | 2.6 (1.7 to 3.7)  | 64.5 (43.6 to 89.1)       | 1.7 (1.1 to 2.6)                   | 66.2 (44.8 to 91.7)                    | 3.8 (2.5 to 5.5) | 87.3 (55.8 to 126)        | 2.8 (1.7 to 4.4)                   | 90.1 (57.7 to 129.7)                   |
| African Region               | Behavioral risks            | 1.7 (1.2 to 2.1)  | 47.4 (35.6 to 59.7)       | 1.2 (0.8 to 1.7)                   | 48.6 (36.4 to 61.4)                    | 2 (1.5 to 2.5)   | 54.5 (40.9 to 69.5)       | 1.7 (1.1 to 2.4)                   | 56.2 (42 to 71.5)                      |
| African Region               | Alcohol use                 | 0.8 (0.6 to 1)    | 23.1 (17.5 to 29)         | 0.5 (0.4 to 0.8)                   | 23.6 (17.9 to 29.7)                    | 1 (0.7 to 1.2)   | 28.1 (21.1 to 35.9)       | 0.8 (0.5 to 1.2)                   | 29 (21.6 to 36.9)                      |
| African Region               | Diet high in red meat       | 0.3 (0.1 to 0.4)  | 7.7 (2.2 to 10.8)         | 0.2 (0.1 to 0.3)                   | 7.9 (2.3 to 11.1)                      | 0.3 (0.1 to 0.5) | 9.5 (2.6 to 13.5)         | 0.3 (0.1 to 0.5)                   | 9.8 (2.7 to 13.9)                      |
| African Region               | Low physical activity       | 0.2 (0.1 to 0.3)  | 3.6 (2 to 6.3)            | 0.1 (0 to 0.2)                     | 3.7 (2 to 6.4)                         | 0.2 (0.1 to 0.4) | 4.5 (2.4 to 7.9)          | 0.2 (0.1 to 0.3)                   | 4.7 (2.5 to 8.1)                       |
| African Region               | Smoking                     | 0.2 (0.1 to 0.3)  | 5.1 (3 to 7.4)            | 0.1 (0.1 to 0.2)                   | 5.3 (3.1 to 7.6)                       | 0.2 (0.1 to 0.3) | 4.3 (2.4 to 6.4)          | 0.1 (0.1 to 0.2)                   | 4.5 (2.5 to 6.6)                       |
| African Region               | Secondhand smoke            | 0.3 (0.1 to 0.6)  | 9.9 (2.4 to 17.4)         | 0.2 (0.1 to 0.5)                   | 10.2 (2.4 to 17.9)                     | 0.3 (0.1 to 0.6) | 10.1 (2.4 to 17.7)        | 0.3 (0.1 to 0.6)                   | 10.4 (2.4 to 18.4)                     |
| African Region               | Metabolic risks             | 1.1 (0.3 to 2.2)  | 19.1 (2.2 to 42.8)        | 0.6 (0.1 to 1.3)                   | 19.7 (2.4 to 43.8)                     | 2 (0.7 to 3.8)   | 36.5 (7.8 to 77)          | 1.3 (0.3 to 2.7)                   | 37.8 (8.2 to 79.9)                     |
| African Region               | High body-mass index        | 0.3 (0 to 0.8)    | 3.7 (-4.6 to 13.1)        | 0.2 (-0.1 to 0.4)                  | 3.8 (-4.6 to 13.6)                     | 0.8 (0.1 to 1.6) | 10.5 (-4.9 to 28)         | 0.4 (-0.1 to 1)                    | 10.9 (-5 to 28.8)                      |
| African Region               | High fasting plasma glucose | 0.7 (0.1 to 1.7)  | 16 (2.9 to 36.8)          | 0.4 (0.1 to 1.1)                   | 16.4 (3 to 37.8)                       | 1.3 (0.2 to 2.9) | 27.6 (5.1 to 63)          | 0.9 (0.2 to 2.2)                   | 28.5 (5.2 to 65.3)                     |
| Eastern Mediterranean Region | All risk factors            | 2.6 (1.4 to 4.3)  | 66.3 (35.4 to 109.7)      | 2 (1 to 3.4)                       | 68.3 (36.5 to 112.8)                   | 4.6 (2.5 to 7.5) | 110.9 (57 to 186.9)       | 4.6 (2.2 to 8)                     | 115.5 (59.3 to 193.7)                  |
| Eastern Mediterranean Region | Behavioral risks            | 1.5 (0.9 to 2.2)  | 43.8 (25.4 to 64.1)       | 1.2 (0.7 to 2)                     | 45 (26.2 to 66.1)                      | 1.9 (1.2 to 2.6) | 55.7 (34.1 to 77.7)       | 2.3 (1.3 to 3.5)                   | 58 (35.6 to 80.5)                      |
| Eastern Mediterranean Region | Alcohol use                 | 0 (0 to 0.1)      | 1.5 (1.1 to 2.1)          | 0 (0 to 0.1)                       | 1.6 (1.1 to 2.2)                       | 0.1 (0 to 0.1)   | 2.2 (1.6 to 3)            | 0.1 (0.1 to 0.1)                   | 2.3 (1.7 to 3.1)                       |
| Eastern Mediterranean Region | Diet high in red meat       | 0.3 (0.1 to 0.5)  | 10.6 (2.3 to 16.1)        | 0.3 (0.1 to 0.5)                   | 10.9 (2.4 to 16.6)                     | 0.5 (0.1 to 0.7) | 14.5 (3.3 to 21.2)        | 0.6 (0.1 to 0.9)                   | 15.1 (3.4 to 22.1)                     |
| Eastern Mediterranean Region | Low physical activity       | 0.3 (0.1 to 0.5)  | 6.6 (3 to 11.6)           | 0.2 (0.1 to 0.4)                   | 6.8 (3.1 to 12)                        | 0.4 (0.2 to 0.7) | 9.8 (4.4 to 16.7)         | 0.4 (0.2 to 0.8)                   | 10.2 (4.6 to 17.5)                     |
| Eastern Mediterranean Region | Smoking                     | 0.3 (0.1 to 0.4)  | 6.9 (3.9 to 10.8)         | 0.2 (0.1 to 0.3)                   | 7.1 (4 to 11.1)                        | 0.3 (0.2 to 0.4) | 7.7 (4.8 to 11)           | 0.3 (0.2 to 0.5)                   | 8 (5 to 11.4)                          |
| Eastern Mediterranean Region | Secondhand smoke            | 0.6 (0.1 to 1.1)  | 19.4 (4.7 to 34.9)        | 0.5 (0.1 to 1)                     | 19.9 (4.9 to 35.7)                     | 0.7 (0.2 to 1.3) | 23.1 (5.6 to 41.4)        | 0.9 (0.2 to 1.7)                   | 24 (5.8 to 42.9)                       |
| Eastern Mediterranean Region | Metabolic risks             | 1.2 (0.3 to 2.7)  | 24.6 (0.5 to 61.1)        | 0.8 (0.1 to 2)                     | 25.4 (0.5 to 63.1)                     | 2.9 (0.9 to 5.8) | 60.1 (9 to 133.5)         | 2.5 (0.4 to 5.8)                   | 62.6 (9.4 to 139.9)                    |
| Eastern Mediterranean Region | High body-mass index        | 0.3 (-0.1 to 0.9) | 2 (-9.5 to 14.1)          | 0.1 (-0.2 to 0.5)                  | 2.2 (-9.7 to 14.6)                     | 0.8 (0 to 1.8)   | 7.9 (-15.2 to 30)         | 0.4 (-0.7 to 1.4)                  | 8.3 (-15.8 to 31.4)                    |
| Eastern Mediterranean Region | High fasting plasma glucose | 0.9 (0.2 to 2.3)  | 23.2 (4 to 57.6)          | 0.7 (0.1 to 1.8)                   | 23.9 (4.1 to 59.4)                     | 2.2 (0.4 to 5.1) | 54.8 (10.8 to 127.4)      | 2.3 (0.4 to 5.5)                   | 57.1 (11.3 to 132.1)                   |
| European Region              | All risk factors            | 7.3 (5.8 to 8.8)  | 193.4 (155.7 to 228.8)    | 13.2 (8.8 to 18.3)                 | 206.7 (166.4 to 244.5)                 | 6 (4.6 to 7.8)   | 144.1 (111.2 to 181.1)    | 15.5 (9.9 to 22.2)                 | 159.6 (123.4 to 200.4)                 |
| European Region              | Behavioral risks            | 5.6 (4.8 to 6.4)  | 163.7 (140.3 to 187)      | 11 (7.6 to 15.3)                   | 174.8 (149.3 to 198.8)                 | 4.1 (3.4 to 4.8) | 110 (92.8 to 128.1)       | 11.8 (7.8 to 16.8)                 | 121.8 (101.8 to 142.2)                 |
| European Region              | Alcohol use                 | 2.8 (2.3 to 3.3)  | 82.5 (68.3 to 97.6)       | 5.6 (3.7 to 8)                     | 88.2 (72.8 to 104.3)                   | 2 (1.6 to 2.4)   | 54.5 (44.5 to 65.7)       | 5.9 (3.9 to 8.5)                   | 60.4 (49.2 to 73)                      |
| European Region              | Diet high in red meat       | 1.1 (0.6 to 1.5)  | 32.8 (16.3 to 43.5)       | 2.2 (1 to 3.4)                     | 35 (17.4 to 46.5)                      | 0.8 (0.4 to 1.1) | 22.2 (10.7 to 29.9)       | 2.4 (1 to 3.8)                     | 24.6 (11.7 to 33.1)                    |
| European Region              | Low physical activity       | 0.3 (0.1 to 0.5)  | 6.8 (3.1 to 12.6)         | 0.5 (0.2 to 1.1)                   | 7.3 (3.4 to 13.5)                      | 0.3 (0.1 to 0.5) | 5.6 (2.5 to 10)           | 0.6 (0.3 to 1.3)                   | 6.2 (2.7 to 11.2)                      |
| European Region              | Smoking                     | 1.4 (1 to 1.8)    | 41 (29.3 to 53.2)         | 2.8 (1.7 to 4.3)                   | 43.8 (31.3 to 57.1)                    | 1 (0.7 to 1.3)   | 27.1 (19.3 to 35.2)       | 3 (1.8 to 4.6)                     | 30.1 (21.4 to 39.4)                    |
| European Region              | Secondhand smoke            | 0.5 (0.1 to 0.9)  | 17.6 (4.3 to 30.3)        | 1.1 (0.2 to 1.9)                   | 18.7 (4.5 to 32.1)                     | 0.4 (0.1 to 0.6) | 11 (2.7 to 18.8)          | 1 (0.2 to 1.9)                     | 12 (3 to 20.7)                         |
| European Region              | Metabolic risks             | 2.1 (0.8 to 3.9)  | 38.7 (6.8 to 78.9)        | 2.9 (0.7 to 5.8)                   | 41.6 (7.4 to 84.1)                     | 2.4 (1 to 4.4)   | 43.9 (10.7 to 85.6)       | 4.7 (1.3 to 9.6)                   | 48.6 (12.1 to 93.6)                    |
| European Region              | High body-mass index        | 1 (0.2 to 2.1)    | 14.2 (-6.6 to 36.8)       | 1.1 (-0.2 to 2.6)                  | 15.3 (-6.7 to 39.5)                    | 1.1 (0.3 to 2.3) | 16.8 (-3 to 40.1)         | 1.8 (-0.1 to 4.1)                  | 18.6 (-3 to 44.2)                      |
| European Region              | High fasting plasma glucose | 1.2 (0.2 to 2.7)  | 26 (4.9 to 58.8)          | 1.9 (0.3 to 4.6)                   | 27.8 (5.2 to 63)                       | 1.4 (0.3 to 3.1) | 29.2 (5.7 to 65.2)        | 3.2 (0.6 to 7.7)                   | 32.4 (6.3 to 72.3)                     |
| Region of the Americas       | All risk factors            | 7.1 (5.5 to 8.9)  | 183.4 (143.6 to 226.3)    | 16.7 (11.1 to 23.3)                | 200.1 (156.8 to 245.9)                 | 5.2 (3.8 to 7)   | 124.1 (91.7 to 163.9)     | 14.1 (8.9 to 20.8)                 | 138.2 (101 to 180.7)                   |
| Region of the Americas       | Behavioral risks            | 5.1 (4.3 to 5.9)  | 145.5 (123.1 to 164.9)    | 12.6 (8.7 to 17.4)                 | 158.1 (134.5 to 180)                   | 3.3 (2.7 to 3.8) | 88.4 (74.3 to 102)        | 9.5 (6.4 to 13.4)                  | 97.9 (82 to 113)                       |
| Region of the Americas       | Alcohol use                 | 2 (1.7 to 2.4)    | 60.2 (49.8 to 71.6)       | 5.2 (3.5 to 7.3)                   | 65.4 (54 to 77.7)                      | 1.4 (1.1 to 1.7) | 39.7 (32.4 to 47.5)       | 4.4 (2.9 to 6.3)                   | 44.1 (35.9 to 52.5)                    |
| Region of the Americas       | Diet high in red meat       | 1.1 (0.5 to 1.5)  | 30.7 (15.4 to 40.7)       | 2.7 (1.3 to 4.1)                   | 33.3 (16.7 to 44.7)                    | 0.8 (0.4 to 1.1) | 21.6 (11.1 to 29.2)       | 2.2 (1 to 3.5)                     | 23.8 (12 to 32.3)                      |
| Region of the Americas       | Low physical activity       | 0.3 (0.1 to 0.6)  | 7.5 (3.1 to 14.6)         | 0.7 (0.3 to 1.5)                   | 8.2 (3.3 to 15.8)                      | 0.2 (0.1 to 0.4) | 5.6 (2.3 to 10.2)         | 0.6 (0.2 to 1.2)                   | 6.2 (2.5 to 11.3)                      |

| Location               | Risk factor                 | 1990             |                           |                                    |                                        | 2019             |                           |                                    |                                        |
|------------------------|-----------------------------|------------------|---------------------------|------------------------------------|----------------------------------------|------------------|---------------------------|------------------------------------|----------------------------------------|
|                        |                             | Deaths           | YLLs (Years of Life Lost) | YLDs (Years Lived with Disability) | DALYs (Disability-Adjusted Life Years) | Deaths           | YLLs (Years of Life Lost) | YLDs (Years Lived with Disability) | DALYs (Disability-Adjusted Life Years) |
| Region of the Americas | Smoking                     | 1.8 (1.3 to 2.3) | 49.1 (35.6 to 63.4)       | 4.4 (2.7 to 6.6)                   | 53.5 (38.8 to 69.4)                    | 0.9 (0.6 to 1.1) | 21.8 (15.4 to 28.8)       | 2.5 (1.5 to 3.8)                   | 24.4 (17.3 to 32.1)                    |
| Region of the Americas | Secondhand smoke            | 0.4 (0.1 to 0.7) | 12.5 (3 to 21.7)          | 0.9 (0.2 to 1.6)                   | 13.3 (3.1 to 23.3)                     | 0.2 (0.1 to 0.4) | 7.1 (1.8 to 12.4)         | 0.6 (0.1 to 1.1)                   | 7.7 (1.9 to 13.5)                      |
| Region of the Americas | Metabolic risks             | 2.5 (0.9 to 4.7) | 48.7 (10.4 to 97.8)       | 5.2 (1.6 to 10.3)                  | 54 (12.3 to 107.1)                     | 2.4 (0.9 to 4.4) | 44.7 (9.6 to 88.6)        | 5.8 (1.8 to 11.3)                  | 50.5 (11.4 to 98.6)                    |
| Region of the Americas | High body-mass index        | 1 (0.2 to 2.2)   | 15.1 (-5.3 to 38.8)       | 2 (0.1 to 4.4)                     | 17.2 (-5.3 to 43.3)                    | 1 (0.2 to 2)     | 13 (-5.6 to 33.2)         | 2.2 (0.1 to 5)                     | 15.3 (-5.6 to 38.3)                    |
| Region of the Americas | High fasting plasma glucose | 1.6 (0.3 to 3.5) | 35.7 (6.8 to 79.7)        | 3.4 (0.6 to 8.1)                   | 39.1 (7.4 to 86.8)                     | 1.6 (0.3 to 3.4) | 34.1 (6.6 to 75)          | 3.9 (0.8 to 9)                     | 38 (7.4 to 83.8)                       |
| South-East Asia Region | All risk factors            | 1.7 (1 to 2.6)   | 46.7 (26.5 to 71.6)       | 1.3 (0.7 to 2.1)                   | 47.9 (27.4 to 73.2)                    | 2.6 (1.5 to 4.1) | 68.4 (39.8 to 106.3)      | 2.6 (1.4 to 4.3)                   | 71.1 (41.4 to 109.9)                   |
| South-East Asia Region | Behavioral risks            | 0.9 (0.5 to 1.3) | 27.4 (15.2 to 39.6)       | 0.7 (0.4 to 1.1)                   | 28.1 (15.6 to 40.7)                    | 1 (0.6 to 1.3)   | 28.4 (16.3 to 40.3)       | 1 (0.6 to 1.6)                     | 29.5 (16.9 to 41.7)                    |
| South-East Asia Region | Alcohol use                 | 0.1 (0.1 to 0.1) | 2.3 (1.6 to 3)            | 0.1 (0 to 0.1)                     | 2.3 (1.7 to 3.1)                       | 0.1 (0.1 to 0.2) | 3.8 (2.6 to 5.2)          | 0.2 (0.1 to 0.2)                   | 4 (2.8 to 5.4)                         |
| South-East Asia Region | Diet high in red meat       | 0.1 (0 to 0.1)   | 3.1 (1.1 to 4.2)          | 0.1 (0 to 0.1)                     | 3.1 (1.1 to 4.3)                       | 0.1 (0 to 0.2)   | 3.6 (1.3 to 5.1)          | 0.1 (0 to 0.2)                     | 3.7 (1.3 to 5.3)                       |
| South-East Asia Region | Low physical activity       | 0.1 (0.1 to 0.2) | 3.2 (1.7 to 5.7)          | 0.1 (0 to 0.2)                     | 3.3 (1.8 to 5.9)                       | 0.1 (0.1 to 0.3) | 3.3 (1.8 to 5.7)          | 0.1 (0.1 to 0.2)                   | 3.4 (1.9 to 6)                         |
| South-East Asia Region | Smoking                     | 0.2 (0.1 to 0.2) | 4.1 (2.5 to 6)            | 0.1 (0.1 to 0.2)                   | 4.2 (2.5 to 6.2)                       | 0.1 (0.1 to 0.2) | 3.2 (1.9 to 4.8)          | 0.1 (0.1 to 0.2)                   | 3.3 (2 to 4.9)                         |
| South-East Asia Region | Secondhand smoke            | 0.5 (0.1 to 0.8) | 15.3 (3.6 to 27.1)        | 0.4 (0.1 to 0.7)                   | 15.7 (3.7 to 27.8)                     | 0.5 (0.1 to 0.8) | 15.1 (3.7 to 26.2)        | 0.5 (0.1 to 1)                     | 15.6 (3.8 to 27)                       |
| South-East Asia Region | Metabolic risks             | 0.8 (0.3 to 1.7) | 20.9 (6.3 to 43.3)        | 0.6 (0.2 to 1.2)                   | 21.5 (6.5 to 44.4)                     | 1.8 (0.7 to 3.3) | 43 (16.9 to 80.2)         | 1.7 (0.7 to 3.2)                   | 44.7 (17.8 to 84.2)                    |
| South-East Asia Region | High body-mass index        | 0.3 (0.1 to 0.6) | 6.1 (1.1 to 15.1)         | 0.2 (0 to 0.5)                     | 6.3 (1.2 to 15.5)                      | 0.8 (0.3 to 1.4) | 17.9 (6.2 to 33.6)        | 0.8 (0.3 to 1.4)                   | 18.7 (6.5 to 34.6)                     |
| South-East Asia Region | High fasting plasma glucose | 0.6 (0.1 to 1.4) | 15.1 (2.7 to 35.5)        | 0.4 (0.1 to 1)                     | 15.6 (2.8 to 36.5)                     | 1.1 (0.2 to 2.5) | 26.7 (5 to 61.9)          | 1 (0.2 to 2.4)                     | 27.7 (5.2 to 64.2)                     |
| Western Pacific Region | All risk factors            | 2.2 (1.5 to 3.1) | 62 (42 to 85.5)           | 3.4 (2.1 to 4.9)                   | 65.4 (44.6 to 90.2)                    | 2.9 (1.8 to 4)   | 76.3 (50.2 to 105.9)      | 7.2 (4.3 to 10.7)                  | 83.4 (55.2 to 114.8)                   |
| Western Pacific Region | Behavioral risks            | 1.4 (1 to 1.7)   | 40.8 (28.7 to 52.1)       | 2.4 (1.5 to 3.4)                   | 43.1 (30.5 to 55)                      | 1.4 (1 to 1.8)   | 40.5 (29.2 to 52)         | 4 (2.5 to 5.7)                     | 44.5 (32.1 to 56.5)                    |
| Western Pacific Region | Alcohol use                 | 0.4 (0.3 to 0.5) | 13.3 (10.7 to 16)         | 1 (0.6 to 1.4)                     | 14.3 (11.4 to 17.3)                    | 0.4 (0.3 to 0.5) | 12.1 (9.4 to 14.9)        | 1.3 (0.8 to 1.9)                   | 13.4 (10.4 to 16.6)                    |
| Western Pacific Region | Diet high in red meat       | 0.3 (0.1 to 0.4) | 9.6 (3.5 to 13.4)         | 0.5 (0.2 to 0.8)                   | 10.1 (3.7 to 13.9)                     | 0.4 (0.2 to 0.6) | 13 (5.9 to 18.3)          | 1.2 (0.5 to 2)                     | 14.2 (6.5 to 19.9)                     |
| Western Pacific Region | Low physical activity       | 0.1 (0 to 0.2)   | 2.2 (1.2 to 4.1)          | 0.1 (0.1 to 0.3)                   | 2.4 (1.2 to 4.4)                       | 0.1 (0 to 0.2)   | 2.2 (1.2 to 4.1)          | 0.2 (0.1 to 0.5)                   | 2.4 (1.3 to 4.5)                       |
| Western Pacific Region | Smoking                     | 0.2 (0.1 to 0.2) | 4.7 (3.1 to 6.4)          | 0.4 (0.2 to 0.5)                   | 5.1 (3.4 to 6.8)                       | 0.2 (0.1 to 0.2) | 3.9 (2.6 to 5.3)          | 0.4 (0.2 to 0.7)                   | 4.3 (2.9 to 5.9)                       |
| Western Pacific Region | Secondhand smoke            | 0.4 (0.1 to 0.7) | 13.2 (3.2 to 22.7)        | 0.6 (0.1 to 1.1)                   | 13.8 (3.3 to 23.7)                     | 0.4 (0.1 to 0.6) | 11.5 (2.9 to 19.9)        | 1 (0.2 to 1.8)                     | 12.5 (3.1 to 21.7)                     |
| Western Pacific Region | Metabolic risks             | 1 (0.3 to 1.9)   | 24.2 (8.2 to 46.9)        | 1.2 (0.4 to 2.4)                   | 25.4 (8.6 to 49.2)                     | 1.7 (0.7 to 2.9) | 41 (16.5 to 71.6)         | 3.7 (1.4 to 6.9)                   | 44.6 (18.1 to 77.8)                    |
| Western Pacific Region | High body-mass index        | 0.5 (0.1 to 1.2) | 12.9 (3 to 29.6)          | 0.6 (0.1 to 1.4)                   | 13.5 (3.2 to 30.9)                     | 1.1 (0.4 to 2.2) | 28 (8.8 to 54.9)          | 2.4 (0.7 to 5)                     | 30.4 (9.5 to 59.3)                     |
| Western Pacific Region | High fasting plasma glucose | 0.5 (0.1 to 1.1) | 12 (2.3 to 27.8)          | 0.6 (0.1 to 1.6)                   | 12.7 (2.4 to 29.2)                     | 0.6 (0.1 to 1.4) | 14.8 (2.7 to 34.2)        | 1.4 (0.2 to 3.4)                   | 16.2 (3 to 37.2)                       |
| <b>SDI Quintiles</b>   |                             |                  |                           |                                    |                                        |                  |                           |                                    |                                        |
| High SDI               | All risk factors            | 7.8 (6.3 to 9.4) | 205.3 (167.3 to 243.5)    | 18.7 (12.5 to 25.8)                | 224 (183 to 264.4)                     | 5.6 (4.3 to 7)   | 133.5 (104.8 to 166)      | 18.9 (12.2 to 27.2)                | 152.4 (118.2 to 189)                   |
| High SDI               | Behavioral risks            | 6.1 (5.2 to 6.9) | 172.5 (148.4 to 194.2)    | 15.2 (10.4 to 21)                  | 187.7 (161.3 to 211.7)                 | 3.8 (3.2 to 4.4) | 101.5 (86.7 to 115.7)     | 14.1 (9.4 to 19.7)                 | 115.6 (98.1 to 132.4)                  |
| High SDI               | Alcohol use                 | 3 (2.5 to 3.6)   | 86.9 (71.8 to 102.8)      | 7.5 (5 to 10.6)                    | 94.4 (78.2 to 111.8)                   | 2 (1.6 to 2.4)   | 53.5 (43.6 to 63.5)       | 7.4 (4.8 to 10.7)                  | 61 (49.6 to 72.4)                      |
| High SDI               | Diet high in red meat       | 1.2 (0.6 to 1.6) | 32.7 (16.8 to 43.6)       | 2.9 (1.4 to 4.6)                   | 35.6 (18.2 to 47.6)                    | 0.8 (0.4 to 1)   | 20.6 (10.3 to 27.6)       | 2.8 (1.3 to 4.6)                   | 23.4 (11.4 to 31.8)                    |
| High SDI               | Low physical activity       | 0.3 (0.1 to 0.6) | 7.4 (2.9 to 14.6)         | 0.7 (0.3 to 1.6)                   | 8.1 (3.1 to 16.1)                      | 0.2 (0.1 to 0.5) | 5.4 (2 to 10.2)           | 0.7 (0.3 to 1.6)                   | 6.1 (2.3 to 11.7)                      |
| High SDI               | Smoking                     | 1.8 (1.3 to 2.3) | 51.3 (37.3 to 65.8)       | 4.6 (2.8 to 6.9)                   | 55.9 (40.9 to 71.7)                    | 0.9 (0.7 to 1.2) | 24.6 (17.8 to 31.7)       | 3.5 (2 to 5.2)                     | 28.1 (20.1 to 36.5)                    |
| High SDI               | Secondhand smoke            | 0.4 (0.1 to 0.7) | 13.2 (3.2 to 22.9)        | 1.1 (0.2 to 2)                     | 14.3 (3.4 to 24.7)                     | 0.2 (0.1 to 0.4) | 7.1 (1.7 to 12.2)         | 0.9 (0.2 to 1.7)                   | 8 (1.9 to 13.8)                        |
| High SDI               | Metabolic risks             | 2.3 (0.9 to 4.3) | 43.9 (10.3 to 87.4)       | 4.6 (1.3 to 9.2)                   | 48.5 (11.7 to 95.2)                    | 2.2 (0.9 to 4)   | 41.8 (11.8 to 79.8)       | 6.3 (2 to 12.4)                    | 48.1 (14.2 to 91.6)                    |
| High SDI               | High body-mass index        | 1 (0.2 to 2.1)   | 15.7 (-3.4 to 38.1)       | 1.8 (0 to 3.9)                     | 17.5 (-3.6 to 42.4)                    | 1 (0.3 to 1.9)   | 14.8 (-1 to 33.6)         | 2.4 (0.2 to 5.3)                   | 17.2 (-0.8 to 38.8)                    |
| High SDI               | High fasting plasma glucose | 1.4 (0.3 to 3)   | 29.9 (5.7 to 67.5)        | 3 (0.6 to 7.3)                     | 33 (6.2 to 73.9)                       | 1.4 (0.3 to 3)   | 29.1 (5.7 to 63.4)        | 4.2 (0.8 to 10)                    | 33.4 (6.5 to 73.3)                     |
| High-middle SDI        | All risk factors            | 4.6 (3.6 to 5.8) | 124.6 (97 to 154.1)       | 7 (4.6 to 9.8)                     | 131.6 (102.8 to 162.4)                 | 4.2 (3.1 to 5.6) | 104.7 (77.2 to 137.6)     | 9.2 (5.9 to 13.3)                  | 113.9 (84.2 to 148.7)                  |
| High-middle SDI        | Behavioral risks            | 3.2 (2.7 to 3.8) | 96.2 (79.1 to 112.2)      | 5.3 (3.6 to 7.4)                   | 101.5 (83.3 to 118.2)                  | 2.4 (2 to 2.9)   | 67.2 (54.1 to 80.4)       | 5.9 (3.9 to 8.3)                   | 73.1 (58.6 to 87.3)                    |
| High-middle SDI        | Alcohol use                 | 1.3 (1.1 to 1.6) | 40.7 (33.5 to 48.5)       | 2.3 (1.6 to 3.3)                   | 43.1 (35.3 to 51)                      | 0.9 (0.7 to 1.1) | 25.3 (20.5 to 31.1)       | 2.2 (1.4 to 3.2)                   | 27.5 (22.3 to 33.9)                    |

| Location         | Risk factor                 | 1990             |                           |                                    |                                        | 2019             |                           |                                    |                                        |
|------------------|-----------------------------|------------------|---------------------------|------------------------------------|----------------------------------------|------------------|---------------------------|------------------------------------|----------------------------------------|
|                  |                             | Deaths           | YLLs (Years of Life Lost) | YLDs (Years Lived with Disability) | DALYs (Disability-Adjusted Life Years) | Deaths           | YLLs (Years of Life Lost) | YLDs (Years Lived with Disability) | DALYs (Disability-Adjusted Life Years) |
| High-middle SDI  | Diet high in red meat       | 0.7 (0.4 to 1)   | 21.7 (10.5 to 28.8)       | 1.2 (0.5 to 1.9)                   | 22.9 (11.1 to 30.4)                    | 0.6 (0.3 to 0.8) | 16.8 (8.4 to 23)          | 1.5 (0.7 to 2.4)                   | 18.4 (9.1 to 24.9)                     |
| High-middle SDI  | Low physical activity       | 0.2 (0.1 to 0.3) | 4.8 (2.4 to 8.3)          | 0.3 (0.1 to 0.6)                   | 5 (2.5 to 8.7)                         | 0.2 (0.1 to 0.3) | 4.1 (2 to 7)              | 0.4 (0.2 to 0.7)                   | 4.5 (2.2 to 7.7)                       |
| High-middle SDI  | Smoking                     | 0.7 (0.5 to 0.9) | 20.7 (14.2 to 27.5)       | 1.2 (0.7 to 1.8)                   | 21.8 (15.1 to 29.1)                    | 0.5 (0.4 to 0.7) | 14.1 (9.8 to 18.6)        | 1.3 (0.7 to 1.9)                   | 15.4 (10.7 to 20.4)                    |
| High-middle SDI  | Secondhand smoke            | 0.5 (0.1 to 0.9) | 16.6 (4 to 28.4)          | 0.8 (0.2 to 1.5)                   | 17.4 (4.2 to 29.7)                     | 0.4 (0.1 to 0.7) | 11.9 (2.9 to 20.6)        | 1 (0.2 to 1.8)                     | 12.9 (3.2 to 22.4)                     |
| High-middle SDI  | Metabolic risks             | 1.7 (0.7 to 3)   | 34.3 (11.4 to 65.5)       | 2 (0.7 to 3.8)                     | 36.3 (12.1 to 68.7)                    | 2.1 (0.9 to 3.7) | 44.4 (17.9 to 78.5)       | 3.9 (1.6 to 7.2)                   | 48.3 (19.7 to 84.6)                    |
| High-middle SDI  | High body-mass index        | 0.8 (0.3 to 1.7) | 15.1 (1.4 to 33.4)        | 0.9 (0.1 to 2)                     | 16 (1.5 to 35.2)                       | 1.2 (0.5 to 2.2) | 23.8 (8.2 to 45.4)        | 2.1 (0.7 to 4.1)                   | 25.9 (9 to 48.9)                       |
| High-middle SDI  | High fasting plasma glucose | 0.9 (0.2 to 2)   | 20.4 (3.8 to 46.7)        | 1.2 (0.2 to 2.9)                   | 21.6 (4 to 49.1)                       | 1 (0.2 to 2.3)   | 22.7 (4.4 to 50.7)        | 2 (0.4 to 4.8)                     | 24.7 (4.7 to 55.3)                     |
| Low SDI          | All risk factors            | 1.9 (1.2 to 2.8) | 50.9 (32.7 to 74.7)       | 1.2 (0.7 to 1.9)                   | 52.1 (33.7 to 76.3)                    | 2.9 (1.8 to 4.5) | 73.4 (45.4 to 112.3)      | 2.1 (1.2 to 3.4)                   | 75.5 (46.8 to 115.8)                   |
| Low SDI          | Behavioral risks            | 1.2 (0.8 to 1.6) | 35.4 (25 to 46.3)         | 0.8 (0.5 to 1.2)                   | 36.2 (25.6 to 47.4)                    | 1.5 (1.1 to 1.9) | 43.3 (32 to 55.3)         | 1.2 (0.8 to 1.7)                   | 44.5 (32.8 to 56.9)                    |
| Low SDI          | Alcohol use                 | 0.4 (0.3 to 0.5) | 12.9 (9.4 to 16.5)        | 0.3 (0.2 to 0.4)                   | 13.2 (9.6 to 16.9)                     | 0.5 (0.4 to 0.7) | 16.2 (11.9 to 20.8)       | 0.4 (0.3 to 0.6)                   | 16.6 (12.2 to 21.3)                    |
| Low SDI          | Diet high in red meat       | 0.2 (0.1 to 0.3) | 6 (1.6 to 8.6)            | 0.1 (0 to 0.2)                     | 6.1 (1.7 to 8.8)                       | 0.3 (0.1 to 0.4) | 7.7 (2.1 to 10.8)         | 0.2 (0.1 to 0.3)                   | 7.9 (2.2 to 11.1)                      |
| Low SDI          | Low physical activity       | 0.1 (0.1 to 0.2) | 3.2 (1.7 to 5.5)          | 0.1 (0 to 0.2)                     | 3.2 (1.8 to 5.7)                       | 0.2 (0.1 to 0.3) | 3.9 (2.2 to 6.7)          | 0.1 (0.1 to 0.2)                   | 4 (2.3 to 6.9)                         |
| Low SDI          | Smoking                     | 0.2 (0.1 to 0.3) | 4.4 (2.4 to 6.7)          | 0.1 (0.1 to 0.2)                   | 4.6 (2.5 to 6.8)                       | 0.2 (0.1 to 0.3) | 5.4 (3 to 7.8)            | 0.2 (0.1 to 0.3)                   | 5.6 (3.1 to 8.1)                       |
| Low SDI          | Secondhand smoke            | 0.3 (0.1 to 0.6) | 10 (2.4 to 17.6)          | 0.2 (0.1 to 0.4)                   | 10.2 (2.5 to 18)                       | 0.4 (0.1 to 0.6) | 11.5 (2.6 to 20.3)        | 0.3 (0.1 to 0.6)                   | 11.8 (2.7 to 20.9)                     |
| Low SDI          | Metabolic risks             | 0.8 (0.2 to 1.6) | 17 (3.6 to 38.8)          | 0.5 (0.1 to 1)                     | 17.5 (3.7 to 39.6)                     | 1.5 (0.5 to 3.1) | 32.8 (7.3 to 72.2)        | 1 (0.3 to 2.2)                     | 33.8 (7.6 to 73.8)                     |
| Low SDI          | High body-mass index        | 0.2 (0 to 0.4)   | 2.5 (-1.6 to 7.9)         | 0.1 (0 to 0.2)                     | 2.5 (-1.6 to 8.1)                      | 0.4 (0 to 0.9)   | 5.3 (-3.3 to 15.9)        | 0.2 (0 to 0.5)                     | 5.5 (-3.3 to 16.4)                     |
| Low SDI          | High fasting plasma glucose | 0.6 (0.1 to 1.4) | 14.8 (2.6 to 35.3)        | 0.4 (0.1 to 0.9)                   | 15.2 (2.7 to 36.4)                     | 1.2 (0.2 to 2.7) | 28.4 (5.4 to 66.2)        | 0.8 (0.2 to 2)                     | 29.2 (5.6 to 67.9)                     |
| Low-middle SDI   | All risk factors            | 2 (1.2 to 2.9)   | 53.4 (32.5 to 79)         | 1.5 (0.9 to 2.4)                   | 54.8 (33.4 to 81)                      | 2.9 (1.8 to 4.5) | 75.1 (44.8 to 114.9)      | 2.9 (1.6 to 4.6)                   | 77.9 (46.5 to 119.5)                   |
| Low-middle SDI   | Behavioral risks            | 1.2 (0.8 to 1.6) | 34.8 (22.5 to 46.7)       | 0.9 (0.6 to 1.4)                   | 35.7 (23.2 to 48)                      | 1.4 (1 to 1.8)   | 39.8 (27.5 to 52.2)       | 1.5 (0.9 to 2.1)                   | 41.3 (28.6 to 54.3)                    |
| Low-middle SDI   | Alcohol use                 | 0.2 (0.1 to 0.2) | 5.4 (4.2 to 6.7)          | 0.1 (0.1 to 0.2)                   | 5.6 (4.3 to 6.9)                       | 0.3 (0.2 to 0.3) | 8.5 (6.6 to 10.6)         | 0.3 (0.2 to 0.4)                   | 8.8 (6.8 to 10.9)                      |
| Low-middle SDI   | Diet high in red meat       | 0.2 (0.1 to 0.3) | 5.9 (2 to 8)              | 0.2 (0.1 to 0.3)                   | 6 (2.1 to 8.2)                         | 0.3 (0.1 to 0.4) | 8.3 (3.1 to 11.5)         | 0.3 (0.1 to 0.5)                   | 8.6 (3.3 to 11.9)                      |
| Low-middle SDI   | Low physical activity       | 0.2 (0.1 to 0.3) | 3.7 (2 to 6.4)            | 0.1 (0.1 to 0.2)                   | 3.8 (2 to 6.6)                         | 0.2 (0.1 to 0.3) | 4.4 (2.4 to 7.6)          | 0.2 (0.1 to 0.3)                   | 4.6 (2.5 to 7.8)                       |
| Low-middle SDI   | Smoking                     | 0.2 (0.2 to 0.3) | 6.2 (3.8 to 8.8)          | 0.2 (0.1 to 0.3)                   | 6.4 (3.9 to 9.1)                       | 0.2 (0.1 to 0.3) | 4.9 (2.9 to 7)            | 0.2 (0.1 to 0.3)                   | 5.1 (3.1 to 7.2)                       |
| Low-middle SDI   | Secondhand smoke            | 0.5 (0.1 to 0.8) | 14.7 (3.5 to 25.5)        | 0.4 (0.1 to 0.7)                   | 15.1 (3.6 to 26.1)                     | 0.5 (0.1 to 0.8) | 15 (3.3 to 25.9)          | 0.5 (0.1 to 1)                     | 15.5 (3.5 to 26.8)                     |
| Low-middle SDI   | Metabolic risks             | 0.9 (0.3 to 1.9) | 20.4 (5.5 to 44.5)        | 0.6 (0.2 to 1.3)                   | 21 (5.7 to 45.8)                       | 1.7 (0.6 to 3.4) | 38.5 (11.7 to 80.1)       | 1.5 (0.5 to 3.1)                   | 40 (12.3 to 82.8)                      |
| Low-middle SDI   | High body-mass index        | 0.2 (0.1 to 0.6) | 4.4 (0.3 to 11.9)         | 0.2 (0 to 0.4)                     | 4.5 (0.4 to 12.3)                      | 0.6 (0.2 to 1.1) | 9.3 (-0.2 to 22.4)        | 0.4 (0.1 to 1)                     | 9.8 (-0.2 to 23.3)                     |
| Low-middle SDI   | High fasting plasma glucose | 0.7 (0.1 to 1.5) | 16.5 (3 to 38.7)          | 0.5 (0.1 to 1.2)                   | 16.9 (3.1 to 40.1)                     | 1.2 (0.2 to 2.8) | 30.5 (5.7 to 71)          | 1.1 (0.2 to 2.7)                   | 31.6 (5.9 to 73.6)                     |
| Middle SDI       | All risk factors            | 2.3 (1.5 to 3.3) | 62.3 (40 to 87.2)         | 2.3 (1.3 to 3.4)                   | 64.5 (41.6 to 90.5)                    | 3.2 (2 to 4.5)   | 81.5 (52.7 to 114.6)      | 5.1 (3 to 7.8)                     | 86.6 (56.2 to 120.8)                   |
| Middle SDI       | Behavioral risks            | 1.3 (0.9 to 1.7) | 39.2 (26.7 to 51.2)       | 1.4 (0.8 to 2)                     | 40.6 (27.4 to 53.1)                    | 1.4 (1 to 1.8)   | 40.9 (28.7 to 52.6)       | 2.5 (1.5 to 3.6)                   | 43.4 (30.3 to 55.8)                    |
| Middle SDI       | Alcohol use                 | 0.3 (0.2 to 0.3) | 8.8 (6.9 to 10.8)         | 0.3 (0.2 to 0.4)                   | 9.1 (7.1 to 11.2)                      | 0.3 (0.3 to 0.4) | 10.2 (8 to 12.6)          | 0.6 (0.4 to 0.8)                   | 10.8 (8.4 to 13.3)                     |
| Middle SDI       | Diet high in red meat       | 0.3 (0.1 to 0.4) | 8.7 (3 to 11.9)           | 0.3 (0.1 to 0.5)                   | 9 (3.1 to 12.3)                        | 0.4 (0.2 to 0.5) | 11.2 (5.2 to 15.4)        | 0.8 (0.3 to 1.2)                   | 12 (5.5 to 16.3)                       |
| Middle SDI       | Low physical activity       | 0.1 (0.1 to 0.2) | 3 (1.7 to 5.3)            | 0.1 (0.1 to 0.2)                   | 3.1 (1.7 to 5.6)                       | 0.1 (0.1 to 0.2) | 3.3 (1.8 to 5.9)          | 0.2 (0.1 to 0.4)                   | 3.5 (1.9 to 6.3)                       |
| Middle SDI       | Smoking                     | 0.2 (0.1 to 0.3) | 5.3 (3.4 to 7.2)          | 0.2 (0.1 to 0.3)                   | 5.5 (3.5 to 7.5)                       | 0.2 (0.1 to 0.2) | 4.2 (2.7 to 5.8)          | 0.3 (0.1 to 0.4)                   | 4.4 (2.9 to 6.1)                       |
| Middle SDI       | Secondhand smoke            | 0.5 (0.1 to 0.8) | 15.2 (3.6 to 26.2)        | 0.5 (0.1 to 0.9)                   | 15.7 (3.7 to 27)                       | 0.4 (0.1 to 0.8) | 13.8 (3.4 to 23.7)        | 0.8 (0.2 to 1.5)                   | 14.6 (3.6 to 25)                       |
| Middle SDI       | Metabolic risks             | 1.1 (0.4 to 2.1) | 25.9 (8.5 to 50.4)        | 1 (0.3 to 2)                       | 26.9 (8.8 to 52.2)                     | 2 (0.9 to 3.5)   | 45.5 (18.4 to 81.6)       | 2.9 (1.1 to 5.3)                   | 48.4 (20.2 to 86.2)                    |
| Middle SDI       | High body-mass index        | 0.5 (0.1 to 1.1) | 10.7 (2 to 25)            | 0.4 (0.1 to 1)                     | 11.2 (2.1 to 25.9)                     | 1.1 (0.4 to 2.1) | 24.5 (7.3 to 48.5)        | 1.6 (0.5 to 3.3)                   | 26.2 (7.9 to 51.3)                     |
| Middle SDI       | High fasting plasma glucose | 0.7 (0.1 to 1.5) | 15.9 (3 to 36.4)          | 0.6 (0.1 to 1.4)                   | 16.5 (3.1 to 37.8)                     | 1 (0.2 to 2.2)   | 23.1 (4.4 to 51.7)        | 1.4 (0.3 to 3.3)                   | 24.5 (4.7 to 54.7)                     |
| <b>Countries</b> |                             |                  |                           |                                    |                                        |                  |                           |                                    |                                        |
| Afghanistan      | All risk factors            | 2 (1.1 to 3.3)   | 51.7 (26.6 to 87.9)       | 1.3 (0.6 to 2.3)                   | 53 (27.3 to 90.2)                      | 3.3 (1.6 to 6)   | 80.1 (37.8 to 149.8)      | 2.1 (1 to 4)                       | 82.3 (38.7 to 153.3)                   |
| Afghanistan      | Behavioral risks            | 1 (0.6 to 1.5)   | 31.4 (17.6 to 46)         | 0.7 (0.4 to 1.1)                   | 32.1 (18 to 46.8)                      | 1.2 (0.7 to 1.8) | 34.8 (19.3 to 52.4)       | 0.9 (0.5 to 1.4)                   | 35.6 (19.8 to 53.6)                    |
| Afghanistan      | Alcohol use                 | 0 (0 to 0)       | 0 (0 to 0)                | 0 (0 to 0)                         | 0 (0 to 0)                             | 0 (0 to 0)       | 0.5 (0.2 to 0.8)          | 0 (0 to 0)                         | 0.5 (0.2 to 0.8)                       |

| Location       | Risk factor                 | 1990               |                           |                                    |                                        | 2019               |                           |                                    |                                        |
|----------------|-----------------------------|--------------------|---------------------------|------------------------------------|----------------------------------------|--------------------|---------------------------|------------------------------------|----------------------------------------|
|                |                             | Deaths             | YLLs (Years of Life Lost) | YLDs (Years Lived with Disability) | DALYs (Disability-Adjusted Life Years) | Deaths             | YLLs (Years of Life Lost) | YLDs (Years Lived with Disability) | DALYs (Disability-Adjusted Life Years) |
| Afghanistan    | Diet high in red meat       | 0.4 (0.1 to 0.6)   | 13.1 (3.9 to 20)          | 0.3 (0.1 to 0.5)                   | 13.4 (4 to 20.5)                       | 0.3 (0.1 to 0.5)   | 10.3 (2.2 to 16.4)        | 0.3 (0.1 to 0.4)                   | 10.6 (2.3 to 16.8)                     |
| Afghanistan    | Low physical activity       | 0.2 (0.1 to 0.4)   | 5.7 (2.4 to 10.4)         | 0.1 (0.1 to 0.3)                   | 5.9 (2.5 to 10.7)                      | 0.3 (0.1 to 0.6)   | 7.3 (2.9 to 13.6)         | 0.2 (0.1 to 0.4)                   | 7.5 (3 to 14)                          |
| Afghanistan    | Smoking                     | 0.1 (0 to 0.1)     | 1.6 (0.9 to 2.4)          | 0 (0 to 0.1)                       | 1.6 (0.9 to 2.5)                       | 0.1 (0.1 to 0.2)   | 3.3 (1.9 to 5.3)          | 0.1 (0 to 0.1)                     | 3.4 (1.9 to 5.4)                       |
| Afghanistan    | Secondhand smoke            | 0.4 (0.1 to 0.7)   | 11.7 (2.7 to 21.6)        | 0.3 (0.1 to 0.5)                   | 12 (2.8 to 22.1)                       | 0.5 (0.1 to 0.9)   | 14.3 (3.6 to 26.6)        | 0.4 (0.1 to 0.7)                   | 14.7 (3.6 to 27.2)                     |
| Afghanistan    | Metabolic risks             | 1 (0.3 to 2.3)     | 22 (0.5 to 54)            | 0.6 (0.1 to 1.4)                   | 22.6 (0.7 to 55.4)                     | 2.3 (0.7 to 4.8)   | 49.2 (8.6 to 114.4)       | 1.4 (0.3 to 3.1)                   | 50.5 (9 to 116.9)                      |
| Afghanistan    | High body-mass index        | 0.2 (-0.1 to 0.6)  | 0.5 (-9.1 to 8.7)         | 0.1 (-0.1 to 0.3)                  | 0.6 (-9.2 to 8.9)                      | 0.5 (0 to 1.1)     | 3.9 (-10.8 to 18.3)       | 0.2 (-0.2 to 0.6)                  | 4 (-10.9 to 18.9)                      |
| Afghanistan    | High fasting plasma glucose | 0.9 (0.2 to 2)     | 22 (3.9 to 51.7)          | 0.5 (0.1 to 1.4)                   | 22.5 (4 to 53)                         | 1.9 (0.4 to 4.3)   | 47 (9.5 to 108.2)         | 1.3 (0.2 to 3.1)                   | 48.3 (9.8 to 110.8)                    |
| Albania        | All risk factors            | 1.5 (1 to 2)       | 38.8 (24.4 to 52.7)       | 2 (1.1 to 2.9)                     | 40.8 (25.7 to 55)                      | 2.6 (1.6 to 4)     | 65.9 (40.9 to 99.9)       | 5.2 (2.9 to 8.4)                   | 71 (43.9 to 108.3)                     |
| Albania        | Behavioral risks            | 1 (0.7 to 1.3)     | 31 (20.9 to 40.8)         | 1.4 (0.9 to 2.1)                   | 32.4 (21.8 to 42.3)                    | 1.7 (1.1 to 2.4)   | 51.3 (33.6 to 74.1)       | 4 (2.3 to 6.3)                     | 55.3 (36.1 to 79.5)                    |
| Albania        | Alcohol use                 | 0.2 (0.1 to 0.3)   | 8 (5.2 to 11)             | 0.3 (0.2 to 0.6)                   | 8.3 (5.4 to 11.4)                      | 0.5 (0.3 to 0.7)   | 16.9 (10.9 to 25.3)       | 1.3 (0.8 to 2.1)                   | 18.2 (11.7 to 27.2)                    |
| Albania        | Diet high in red meat       | 0.2 (0.1 to 0.3)   | 7.9 (2.1 to 10.7)         | 0.4 (0.1 to 0.6)                   | 8.3 (2.2 to 11.2)                      | 0.5 (0.2 to 0.8)   | 16 (6.8 to 25.6)          | 1.3 (0.5 to 2.1)                   | 17.3 (7.3 to 27.6)                     |
| Albania        | Low physical activity       | 0.1 (0 to 0.1)     | 2 (1.2 to 3.6)            | 0.1 (0.1 to 0.2)                   | 2.1 (1.3 to 3.8)                       | 0.1 (0.1 to 0.2)   | 2.7 (1.4 to 4.7)          | 0.2 (0.1 to 0.4)                   | 2.9 (1.5 to 5.1)                       |
| Albania        | Smoking                     | 0.2 (0.1 to 0.2)   | 3.8 (2.4 to 5.7)          | 0.2 (0.1 to 0.3)                   | 4 (2.5 to 6)                           | 0.3 (0.2 to 0.4)   | 7 (4.1 to 10.7)           | 0.6 (0.3 to 0.9)                   | 7.5 (4.4 to 11.7)                      |
| Albania        | Secondhand smoke            | 0.3 (0.1 to 0.6)   | 10.6 (2.7 to 18)          | 0.5 (0.1 to 0.9)                   | 11 (2.8 to 18.9)                       | 0.4 (0.1 to 0.7)   | 11.9 (3 to 22.6)          | 0.9 (0.2 to 1.8)                   | 12.8 (3.2 to 24.4)                     |
| Albania        | Metabolic risks             | 0.6 (0.1 to 1.1)   | 8.7 (-2 to 20.6)          | 0.6 (0.1 to 1.3)                   | 9.3 (-1.9 to 21.7)                     | 1 (0.3 to 2.1)     | 16.8 (-0.4 to 41.1)       | 1.3 (-0.1 to 3.2)                  | 18.1 (-0.5 to 44.7)                    |
| Albania        | High body-mass index        | 0.3 (0 to 0.6)     | 2.4 (-5.6 to 9.9)         | 0.2 (-0.1 to 0.7)                  | 2.7 (-5.7 to 10.4)                     | 0.5 (0 to 1.2)     | 5.2 (-8.2 to 19.4)        | 0.4 (-0.7 to 1.5)                  | 5.5 (-8.8 to 21.1)                     |
| Albania        | High fasting plasma glucose | 0.3 (0.1 to 0.7)   | 6.6 (1.2 to 15.7)         | 0.3 (0.1 to 0.9)                   | 6.9 (1.2 to 16.4)                      | 0.5 (0.1 to 1.3)   | 12.3 (2.2 to 30.3)        | 1 (0.2 to 2.6)                     | 13.3 (2.3 to 32.9)                     |
| Algeria        | All risk factors            | 2 (1.1 to 3.2)     | 45.3 (21.7 to 75.7)       | 1.8 (0.9 to 3.2)                   | 47.1 (22.9 to 78.7)                    | 3 (1.5 to 4.9)     | 65.1 (29.9 to 112.1)      | 3.7 (1.7 to 6.7)                   | 68.9 (31.3 to 118.6)                   |
| Algeria        | Behavioral risks            | 1.1 (0.6 to 1.6)   | 31.2 (17.9 to 46.3)       | 1.2 (0.6 to 1.9)                   | 32.4 (18.8 to 48.1)                    | 1.2 (0.7 to 1.8)   | 33.7 (19.8 to 50.9)       | 1.9 (1 to 3.2)                     | 35.7 (20.9 to 53.7)                    |
| Algeria        | Alcohol use                 | 0 (0 to 0.1)       | 1.5 (0.9 to 2.4)          | 0.1 (0 to 0.1)                     | 1.6 (0.9 to 2.5)                       | 0.1 (0.1 to 0.1)   | 2.7 (1.6 to 4)            | 0.1 (0.1 to 0.2)                   | 2.8 (1.7 to 4.2)                       |
| Algeria        | Diet high in red meat       | 0.2 (0 to 0.3)     | 6.6 (1.3 to 10.5)         | 0.2 (0 to 0.4)                     | 6.9 (1.3 to 10.9)                      | 0.3 (0 to 0.4)     | 7.6 (1.5 to 11.9)         | 0.4 (0.1 to 0.8)                   | 8 (1.6 to 12.6)                        |
| Algeria        | Low physical activity       | 0.3 (0.1 to 0.5)   | 5.8 (2.3 to 11)           | 0.2 (0.1 to 0.5)                   | 6.1 (2.4 to 11.5)                      | 0.3 (0.1 to 0.5)   | 6.9 (2.8 to 12.8)         | 0.4 (0.2 to 0.8)                   | 7.3 (2.9 to 13.5)                      |
| Algeria        | Smoking                     | 0.1 (0.1 to 0.1)   | 2.4 (1.4 to 3.9)          | 0.1 (0 to 0.2)                     | 2.5 (1.5 to 4)                         | 0.1 (0.1 to 0.1)   | 2.1 (1.2 to 3.3)          | 0.1 (0.1 to 0.2)                   | 2.2 (1.3 to 3.5)                       |
| Algeria        | Secondhand smoke            | 0.5 (0.1 to 0.9)   | 15.7 (3.6 to 27.3)        | 0.6 (0.1 to 1.1)                   | 16.2 (3.7 to 28.4)                     | 0.5 (0.1 to 0.9)   | 15.5 (3.9 to 28.5)        | 0.9 (0.2 to 1.7)                   | 16.4 (4.1 to 30.1)                     |
| Algeria        | Metabolic risks             | 1 (0.2 to 2.2)     | 15.5 (-5.6 to 42.9)       | 0.8 (0 to 1.9)                     | 16.2 (-5.7 to 44.6)                    | 2 (0.6 to 3.9)     | 34.7 (0.7 to 78.8)        | 2 (0 to 4.8)                       | 36.7 (0.6 to 83.6)                     |
| Algeria        | High body-mass index        | 0.3 (-0.1 to 0.8)  | -1.5 (-15.1 to 10.3)      | 0.1 (-0.4 to 0.5)                  | -1.4 (-15.6 to 10.8)                   | 0.6 (-0.1 to 1.5)  | 2.9 (-15.5 to 21.8)       | 0.2 (-0.9 to 1.2)                  | 3.1 (-16.6 to 23)                      |
| Algeria        | High fasting plasma glucose | 0.8 (0.1 to 1.8)   | 17.7 (3.3 to 43.1)        | 0.7 (0.1 to 1.8)                   | 18.4 (3.5 to 44.7)                     | 1.5 (0.3 to 3.3)   | 33.9 (6.5 to 77.6)        | 2 (0.4 to 4.7)                     | 35.9 (6.9 to 82.6)                     |
| American Samoa | All risk factors            | 10.2 (6.1 to 14.5) | 250.2 (151.6 to 353.9)    | 8.8 (4.9 to 13.5)                  | 258.9 (157.2 to 367.3)                 | 15.4 (8.9 to 22.9) | 381.1 (226.2 to 561.3)    | 15.1 (8.4 to 23.7)                 | 396.1 (235.6 to 580)                   |
| American Samoa | Behavioral risks            | 3 (1.9 to 4)       | 81.1 (52.1 to 110.4)      | 2.8 (1.6 to 4.2)                   | 83.9 (54 to 113.6)                     | 3.9 (2.6 to 5.3)   | 108.4 (71.1 to 148.6)     | 4.3 (2.5 to 6.5)                   | 112.6 (73.7 to 155)                    |
| American Samoa | Alcohol use                 | 0.1 (0 to 0.2)     | 3.7 (1 to 7.2)            | 0.1 (0 to 0.3)                     | 3.8 (1.1 to 7.5)                       | 0.1 (0 to 0.3)     | 4.6 (1.2 to 9.5)          | 0.2 (0 to 0.4)                     | 4.8 (1.2 to 9.9)                       |
| American Samoa | Diet high in red meat       | 0.7 (0.2 to 1.1)   | 20.4 (6.7 to 31.2)        | 0.7 (0.2 to 1.1)                   | 21.1 (7 to 32.3)                       | 0.9 (0.3 to 1.4)   | 26.7 (8.6 to 41.2)        | 1.1 (0.3 to 1.8)                   | 27.8 (8.8 to 42.7)                     |
| American Samoa | Low physical activity       | 0.5 (0.2 to 0.9)   | 10.6 (3.9 to 20.1)        | 0.4 (0.1 to 0.7)                   | 10.9 (4 to 20.8)                       | 0.7 (0.3 to 1.3)   | 16 (5.5 to 30.3)          | 0.6 (0.2 to 1.3)                   | 16.6 (5.7 to 31.5)                     |
| American Samoa | Smoking                     | 1 (0.6 to 1.5)     | 27.7 (14.9 to 42)         | 1 (0.5 to 1.6)                     | 28.6 (15.6 to 43.4)                    | 1.3 (0.8 to 1.9)   | 35.4 (19.9 to 53.6)       | 1.4 (0.7 to 2.3)                   | 36.8 (20.6 to 55.6)                    |
| American Samoa | Secondhand smoke            | 0.8 (0.2 to 1.4)   | 23.2 (5.1 to 41.1)        | 0.8 (0.2 to 1.5)                   | 24 (5.2 to 42.3)                       | 1.1 (0.3 to 1.9)   | 31.1 (7.7 to 56.8)        | 1.2 (0.3 to 2.3)                   | 32.3 (8 to 59.5)                       |
| American Samoa | Metabolic risks             | 8.4 (4 to 13.1)    | 196.4 (94.3 to 305.2)     | 6.9 (3.3 to 11.6)                  | 203.3 (98.1 to 315.5)                  | 13.2 (6.4 to 20.9) | 314.1 (151.5 to 505.5)    | 12.4 (6 to 20.4)                   | 326.6 (157.4 to 523.1)                 |
| American Samoa | High body-mass index        | 6.3 (2.4 to 10.7)  | 148.5 (61.8 to 246.3)     | 5.2 (1.9 to 9.3)                   | 153.7 (64.1 to 254)                    | 8.9 (3.3 to 15.2)  | 210.2 (78.3 to 354.4)     | 8.3 (3.1 to 14.1)                  | 218.4 (81.3 to 367.4)                  |
| American Samoa | High fasting plasma glucose | 3 (0.6 to 6.7)     | 68.8 (13.3 to 154)        | 2.4 (0.5 to 5.8)                   | 71.3 (13.7 to 159.4)                   | 6.1 (1.4 to 13)    | 148.2 (34.2 to 319.7)     | 5.9 (1.3 to 13.5)                  | 154.1 (35.4 to 330.2)                  |
| Andorra        | All risk factors            | 6.6 (4.6 to 9.6)   | 168 (118.7 to 242.7)      | 15.7 (9.6 to 24)                   | 183.7 (129.7 to 264.2)                 | 5.8 (3.9 to 8.2)   | 142.4 (96.4 to 203.1)     | 20 (11.7 to 31.1)                  | 162.4 (109.9 to 230)                   |
| Andorra        | Behavioral risks            | 5.3 (3.8 to 7.6)   | 148.6 (104.5 to 210)      | 13.7 (8.2 to 20.7)                 | 162.3 (114.6 to 231.2)                 | 4.3 (2.9 to 6)     | 116.6 (80 to 163.1)       | 16.3 (9.6 to 25.1)                 | 132.9 (91.8 to 187.7)                  |

| Location            | Risk factor                 | 1990               |                           |                                    |                                        | 2019              |                           |                                    |                                        |
|---------------------|-----------------------------|--------------------|---------------------------|------------------------------------|----------------------------------------|-------------------|---------------------------|------------------------------------|----------------------------------------|
|                     |                             | Deaths             | YLLs (Years of Life Lost) | YLDs (Years Lived with Disability) | DALYs (Disability-Adjusted Life Years) | Deaths            | YLLs (Years of Life Lost) | YLDs (Years Lived with Disability) | DALYs (Disability-Adjusted Life Years) |
| Andorra             | Alcohol use                 | 2.8 (1.9 to 4.1)   | 78.4 (53 to 114.8)        | 7.2 (4.1 to 11.3)                  | 85.7 (58.3 to 124.7)                   | 2.2 (1.4 to 3.1)  | 61.1 (39.8 to 84.9)       | 8.5 (4.8 to 13.2)                  | 69.6 (46.1 to 98.1)                    |
| Andorra             | Diet high in red meat       | 1.1 (0.5 to 1.7)   | 28.8 (13.3 to 46.2)       | 2.7 (1.1 to 4.6)                   | 31.5 (14.4 to 51.1)                    | 0.9 (0.4 to 1.5)  | 24.2 (10.9 to 38.8)       | 3.4 (1.4 to 6)                     | 27.6 (12.6 to 44.5)                    |
| Andorra             | Low physical activity       | 0.3 (0.1 to 0.7)   | 7.2 (2.2 to 15.8)         | 0.7 (0.2 to 1.6)                   | 7.9 (2.5 to 17.1)                      | 0.3 (0.1 to 0.6)  | 7 (2.2 to 14.3)           | 1 (0.3 to 2.1)                     | 8 (2.6 to 16.6)                        |
| Andorra             | Smoking                     | 1.4 (0.8 to 2.1)   | 39.8 (24 to 60.9)         | 3.6 (2 to 6)                       | 43.4 (26.1 to 66.9)                    | 1 (0.6 to 1.6)    | 28.6 (16.5 to 45.4)       | 4 (2 to 6.8)                       | 32.6 (19 to 51.8)                      |
| Andorra             | Secondhand smoke            | 0.4 (0.1 to 0.7)   | 11.9 (2.6 to 22.7)        | 1.1 (0.2 to 2.1)                   | 13 (2.8 to 24.7)                       | 0.3 (0.1 to 0.5)  | 8.2 (1.9 to 15.5)         | 1.1 (0.3 to 2.2)                   | 9.4 (2.1 to 17.5)                      |
| Andorra             | Metabolic risks             | 1.6 (0.6 to 3.3)   | 26.5 (3.1 to 60.7)        | 2.8 (0.5 to 6)                     | 29.2 (3.6 to 66.2)                     | 1.9 (0.6 to 3.9)  | 34.7 (7.1 to 74.7)        | 5 (1 to 11)                        | 39.7 (8 to 86)                         |
| Andorra             | High body-mass index        | 0.9 (0.2 to 2)     | 11.9 (-4.8 to 33.1)       | 1.3 (-0.3 to 3.3)                  | 13.2 (-5.5 to 36.1)                    | 0.9 (0.2 to 2)    | 13 (-2.8 to 33.7)         | 1.9 (-0.4 to 4.9)                  | 14.9 (-3.3 to 38.6)                    |
| Andorra             | High fasting plasma glucose | 0.8 (0.1 to 1.9)   | 15.4 (2.7 to 38.6)        | 1.5 (0.3 to 4.1)                   | 17 (2.9 to 43.3)                       | 1.1 (0.2 to 2.8)  | 23.1 (4 to 57.8)          | 3.3 (0.6 to 8.9)                   | 26.4 (4.6 to 66.7)                     |
| Angola              | All risk factors            | 2 (1.1 to 3.1)     | 54.3 (31.6 to 85.5)       | 1.2 (0.7 to 2)                     | 55.6 (32.2 to 87.3)                    | 4.2 (2.7 to 6.3)  | 108.5 (69.2 to 161.8)     | 2.9 (1.8 to 4.7)                   | 111.4 (71.4 to 166.1)                  |
| Angola              | Behavioral risks            | 1.3 (0.8 to 1.9)   | 39.9 (25 to 59)           | 0.8 (0.5 to 1.3)                   | 40.8 (25.5 to 60.5)                    | 2.9 (2 to 4)      | 81.3 (55.6 to 114.8)      | 2.1 (1.3 to 3.3)                   | 83.4 (57.1 to 118.2)                   |
| Angola              | Alcohol use                 | 0.6 (0.4 to 1)     | 20.2 (12.2 to 29.8)       | 0.4 (0.2 to 0.7)                   | 20.6 (12.5 to 30.4)                    | 1.9 (1.3 to 2.6)  | 53.7 (35.6 to 76.1)       | 1.4 (0.8 to 2.2)                   | 55.1 (36.7 to 78.5)                    |
| Angola              | Diet high in red meat       | 0.2 (0 to 0.4)     | 6.7 (1.2 to 11.2)         | 0.1 (0 to 0.2)                     | 6.8 (1.2 to 11.4)                      | 0.4 (0.1 to 0.6)  | 10.9 (2.2 to 18)          | 0.3 (0.1 to 0.5)                   | 11.2 (2.3 to 18.5)                     |
| Angola              | Low physical activity       | 0.2 (0.1 to 0.3)   | 3.7 (1.7 to 7.3)          | 0.1 (0 to 0.2)                     | 3.8 (1.7 to 7.5)                       | 0.3 (0.1 to 0.5)  | 5.5 (2.4 to 10.8)         | 0.2 (0.1 to 0.3)                   | 5.6 (2.5 to 11.1)                      |
| Angola              | Smoking                     | 0.1 (0.1 to 0.2)   | 3.5 (1.8 to 5.6)          | 0.1 (0 to 0.1)                     | 3.6 (1.8 to 5.8)                       | 0.2 (0.1 to 0.3)  | 4.4 (2.4 to 7.3)          | 0.1 (0.1 to 0.2)                   | 4.6 (2.4 to 7.5)                       |
| Angola              | Secondhand smoke            | 0.2 (0 to 0.4)     | 7.3 (1.7 to 14.2)         | 0.1 (0 to 0.3)                     | 7.5 (1.7 to 14.5)                      | 0.3 (0.1 to 0.6)  | 10.4 (2.3 to 19.3)        | 0.3 (0.1 to 0.5)                   | 10.6 (2.3 to 19.8)                     |
| Angola              | Metabolic risks             | 0.7 (0.2 to 1.7)   | 15.9 (2.5 to 38.6)        | 0.4 (0.1 to 1)                     | 16.3 (2.6 to 39.7)                     | 1.6 (0.5 to 3.3)  | 31.8 (5.9 to 72.8)        | 0.9 (0.2 to 2.1)                   | 32.7 (6.1 to 74.9)                     |
| Angola              | High body-mass index        | 0.1 (0 to 0.3)     | 1.1 (-1.8 to 5.5)         | 0 (0 to 0.2)                       | 1.2 (-1.9 to 5.6)                      | 0.4 (0 to 1)      | 6 (-5 to 19.6)            | 0.2 (-0.1 to 0.6)                  | 6.3 (-5.1 to 20.1)                     |
| Angola              | High fasting plasma glucose | 0.6 (0.1 to 1.6)   | 15 (2.6 to 37.8)          | 0.4 (0.1 to 0.9)                   | 15.3 (2.6 to 38.8)                     | 1.2 (0.2 to 2.7)  | 26.5 (4.8 to 63.5)        | 0.8 (0.1 to 1.9)                   | 27.2 (4.9 to 65.2)                     |
| Antigua and Barbuda | All risk factors            | 4.3 (2.6 to 6.6)   | 104.7 (62.5 to 158.9)     | 5.1 (2.8 to 8.3)                   | 109.9 (65.6 to 166.2)                  | 7.8 (4.7 to 12.4) | 177.7 (108.7 to 279.2)    | 11.4 (6.4 to 19)                   | 189.1 (115.9 to 298.1)                 |
| Antigua and Barbuda | Behavioral risks            | 2.1 (1.5 to 2.7)   | 61 (43.8 to 79)           | 2.8 (1.8 to 4.1)                   | 63.8 (46.1 to 82.1)                    | 3.4 (2.6 to 4.3)  | 91.5 (69.2 to 117.9)      | 5.7 (3.8 to 8.2)                   | 97.1 (73.8 to 124.6)                   |
| Antigua and Barbuda | Alcohol use                 | 0.6 (0.4 to 0.8)   | 20.3 (12.6 to 28.6)       | 0.9 (0.5 to 1.4)                   | 21.2 (13.1 to 30)                      | 1.4 (1 to 1.8)    | 41.7 (30.4 to 56.1)       | 2.5 (1.6 to 3.7)                   | 44.2 (32.1 to 59.3)                    |
| Antigua and Barbuda | Diet high in red meat       | 0.5 (0.1 to 0.7)   | 15.3 (3.3 to 21.4)        | 0.7 (0.2 to 1.1)                   | 16 (3.5 to 22.4)                       | 0.6 (0.1 to 0.9)  | 17 (3.9 to 24.9)          | 1.1 (0.2 to 1.7)                   | 18.1 (4.1 to 26.5)                     |
| Antigua and Barbuda | Low physical activity       | 0.4 (0.1 to 0.7)   | 8.1 (3 to 15.7)           | 0.4 (0.1 to 0.9)                   | 8.5 (3.1 to 16.7)                      | 0.6 (0.2 to 1.1)  | 12.1 (3.9 to 23.2)        | 0.8 (0.3 to 1.6)                   | 12.9 (4.1 to 24.5)                     |
| Antigua and Barbuda | Smoking                     | 0.4 (0.3 to 0.6)   | 11 (7 to 16)              | 0.5 (0.3 to 0.8)                   | 11.5 (7.4 to 16.8)                     | 0.6 (0.4 to 0.9)  | 15.5 (9.8 to 22.7)        | 1 (0.6 to 1.6)                     | 16.4 (10.5 to 24.4)                    |
| Antigua and Barbuda | Secondhand smoke            | 0.3 (0.1 to 0.5)   | 8.7 (2 to 15.3)           | 0.4 (0.1 to 0.7)                   | 9 (2 to 15.9)                          | 0.3 (0.1 to 0.6)  | 9.4 (2.3 to 17.1)         | 0.6 (0.1 to 1.1)                   | 10 (2.4 to 18.2)                       |
| Antigua and Barbuda | Metabolic risks             | 2.4 (0.7 to 4.9)   | 48.1 (9.1 to 105.7)       | 2.6 (0.6 to 5.5)                   | 50.7 (9.7 to 111.2)                    | 4.9 (1.8 to 9.6)  | 97.4 (27.7 to 203)        | 6.5 (2 to 13.6)                    | 103.9 (30 to 214)                      |
| Antigua and Barbuda | High body-mass index        | 0.6 (0 to 1.5)     | 7.9 (-9.3 to 26.8)        | 0.5 (-0.3 to 1.5)                  | 8.5 (-9.6 to 28.1)                     | 1.5 (0.3 to 3.3)  | 25.3 (-4.1 to 61.4)       | 1.8 (0.1 to 4.1)                   | 27.1 (-4.3 to 65.7)                    |
| Antigua and Barbuda | High fasting plasma glucose | 1.8 (0.4 to 4.2)   | 41.8 (7.9 to 96)          | 2.1 (0.4 to 5)                     | 43.9 (8.3 to 100.3)                    | 3.6 (0.7 to 8.1)  | 77 (15.9 to 174.1)        | 5 (1 to 11.9)                      | 82.1 (16.9 to 186.3)                   |
| Argentina           | All risk factors            | 10.5 (8.5 to 12.6) | 274.2 (226.2 to 324.3)    | 11.4 (7.6 to 15.8)                 | 285.6 (236.7 to 338.2)                 | 9.5 (7.3 to 12.1) | 226.6 (176.5 to 285.1)    | 14.1 (8.8 to 21.5)                 | 240.7 (187.6 to 302)                   |
| Argentina           | Behavioral risks            | 8.6 (7.3 to 9.9)   | 240 (204.1 to 276.3)      | 9.7 (6.5 to 13.5)                  | 249.7 (212.6 to 286.9)                 | 6.8 (5.6 to 8)    | 179.2 (150.1 to 209.9)    | 11 (6.8 to 16.2)                   | 190.2 (158.7 to 224.1)                 |
| Argentina           | Alcohol use                 | 4.2 (3.4 to 5.1)   | 122.6 (100.2 to 147.6)    | 4.9 (3.2 to 7)                     | 127.5 (104.1 to 153.4)                 | 3.2 (2.5 to 3.9)  | 87.4 (68.6 to 107.6)      | 5.3 (3.2 to 8)                     | 92.7 (72.4 to 114.3)                   |
| Argentina           | Diet high in red meat       | 1.9 (0.9 to 2.8)   | 52.8 (25.5 to 77.1)       | 2.1 (1 to 3.6)                     | 54.9 (26.3 to 80.7)                    | 1.7 (0.9 to 2.5)  | 44.6 (21.9 to 65.2)       | 2.7 (1.3 to 4.8)                   | 47.3 (23.1 to 69.7)                    |
| Argentina           | Low physical activity       | 0.1 (0.1 to 0.3)   | 3.1 (2.2 to 8.7)          | 0.1 (0.1 to 0.4)                   | 3.2 (2.3 to 9)                         | 0.1 (0.1 to 0.3)  | 2.9 (1.9 to 7.7)          | 0.2 (0.1 to 0.5)                   | 3 (2 to 8.1)                           |
| Argentina           | Smoking                     | 2.5 (1.7 to 3.3)   | 67.7 (46.6 to 91.4)       | 2.8 (1.6 to 4.2)                   | 70.5 (48.5 to 95.3)                    | 1.9 (1.3 to 2.4)  | 47.3 (32.8 to 62.7)       | 2.9 (1.7 to 4.6)                   | 50.2 (34.6 to 66.9)                    |
| Argentina           | Secondhand smoke            | 0.8 (0.2 to 1.4)   | 22.3 (5.4 to 38.8)        | 0.9 (0.2 to 1.7)                   | 23.2 (5.6 to 40.4)                     | 0.6 (0.1 to 1)    | 15.4 (3.5 to 27.2)        | 0.9 (0.2 to 1.8)                   | 16.4 (3.8 to 29)                       |
| Argentina           | Metabolic risks             | 2.6 (0.9 to 5)     | 48.5 (11.4 to 99)         | 2.3 (0.6 to 4.7)                   | 50.8 (12 to 103)                       | 3.5 (1.3 to 6.5)  | 64 (16.9 to 126.6)        | 4.2 (1.2 to 8.8)                   | 68.2 (18.2 to 134.5)                   |
| Argentina           | High body-mass index        | 1.1 (0.2 to 2.3)   | 15.8 (-4.3 to 40)         | 0.8 (0 to 2)                       | 16.6 (-4.2 to 42.2)                    | 1.5 (0.4 to 3.1)  | 22.1 (-3 to 53.5)         | 1.5 (-0.1 to 3.6)                  | 23.6 (-3 to 56.9)                      |
| Argentina           | High fasting plasma glucose | 1.6 (0.3 to 3.7)   | 34.3 (6.5 to 78.7)        | 1.5 (0.3 to 3.7)                   | 35.9 (6.8 to 82.5)                     | 2.2 (0.4 to 4.8)  | 44.9 (8.4 to 101)         | 2.9 (0.5 to 7.3)                   | 47.8 (9 to 106.9)                      |

| Location   | Risk factor                 | 1990              |                           |                                    |                                        | 2019             |                           |                                    |                                        |
|------------|-----------------------------|-------------------|---------------------------|------------------------------------|----------------------------------------|------------------|---------------------------|------------------------------------|----------------------------------------|
|            |                             | Deaths            | YLLs (Years of Life Lost) | YLDs (Years Lived with Disability) | DALYs (Disability-Adjusted Life Years) | Deaths           | YLLs (Years of Life Lost) | YLDs (Years Lived with Disability) | DALYs (Disability-Adjusted Life Years) |
| Armenia    | All risk factors            | 5.7 (3.9 to 7.8)  | 165.9 (112.3 to 222.9)    | 6.7 (4.1 to 10)                    | 172.6 (116.9 to 231.1)                 | 6 (3.8 to 8.6)   | 153 (97.3 to 221.3)       | 9.7 (5.6 to 15)                    | 162.6 (103.5 to 235.5)                 |
| Armenia    | Behavioral risks            | 3.7 (2.7 to 4.7)  | 125.1 (88.6 to 158.1)     | 4.9 (3 to 7.2)                     | 130 (92.8 to 164.3)                    | 3.1 (2.2 to 4.2) | 95 (67.2 to 125.9)        | 5.9 (3.6 to 8.8)                   | 100.9 (71.2 to 133.5)                  |
| Armenia    | Alcohol use                 | 1.5 (1.1 to 1.9)  | 54.9 (41.7 to 68.8)       | 2.1 (1.4 to 3.1)                   | 57 (43.3 to 71.6)                      | 1.3 (0.9 to 1.7) | 42.6 (30.6 to 57)         | 2.6 (1.7 to 4)                     | 45.3 (32.3 to 60.7)                    |
| Armenia    | Diet high in red meat       | 0.8 (0.2 to 1)    | 25.1 (6.5 to 33.2)        | 1 (0.3 to 1.6)                     | 26.1 (6.7 to 34.6)                     | 0.8 (0.3 to 1.2) | 24.2 (8.8 to 35.2)        | 1.5 (0.5 to 2.4)                   | 25.8 (9.3 to 37.3)                     |
| Armenia    | Low physical activity       | 0.2 (0.1 to 0.3)  | 4.8 (3.1 to 9.2)          | 0.2 (0.1 to 0.4)                   | 5 (3.2 to 9.6)                         | 0.2 (0.1 to 0.3) | 4.2 (2.5 to 8)            | 0.3 (0.1 to 0.5)                   | 4.5 (2.6 to 8.5)                       |
| Armenia    | Smoking                     | 0.3 (0.2 to 0.4)  | 7.7 (4.4 to 11.8)         | 0.3 (0.2 to 0.5)                   | 8 (4.6 to 12.3)                        | 0.2 (0.1 to 0.3) | 4.8 (2.9 to 7.4)          | 0.3 (0.2 to 0.5)                   | 5.2 (3 to 7.8)                         |
| Armenia    | Secondhand smoke            | 1.2 (0.3 to 2)    | 38.9 (9.7 to 66.4)        | 1.5 (0.4 to 2.8)                   | 40.4 (10.2 to 69)                      | 0.8 (0.2 to 1.4) | 24.2 (5.5 to 43.1)        | 1.5 (0.3 to 2.8)                   | 25.8 (5.9 to 45.8)                     |
| Armenia    | Metabolic risks             | 2.2 (0.6 to 4.3)  | 45.9 (1.7 to 100.4)       | 2 (0.2 to 4.3)                     | 47.9 (2.1 to 104.4)                    | 3.2 (1.1 to 6)   | 66.1 (15.2 to 131.2)      | 4.2 (1 to 8.7)                     | 70.3 (16.2 to 139.4)                   |
| Armenia    | High body-mass index        | 0.9 (-0.1 to 2.2) | 12.3 (-16.9 to 40.3)      | 0.6 (-0.5 to 1.7)                  | 12.9 (-17.4 to 42)                     | 1.5 (0.3 to 2.9) | 24 (-4.5 to 56.1)         | 1.5 (-0.3 to 3.7)                  | 25.5 (-4.8 to 59.6)                    |
| Armenia    | High fasting plasma glucose | 1.3 (0.3 to 3)    | 35.2 (6.6 to 80.5)        | 1.5 (0.3 to 3.6)                   | 36.7 (6.9 to 84.1)                     | 1.9 (0.4 to 4.3) | 45.6 (8.7 to 104)         | 2.9 (0.5 to 6.9)                   | 48.5 (9.2 to 111.4)                    |
| Australia  | All risk factors            | 8.5 (7 to 10)     | 226.8 (190.2 to 261.2)    | 19.8 (13.3 to 27.8)                | 246.6 (205.9 to 285.5)                 | 5.9 (4.6 to 7.4) | 140 (111.4 to 171.7)      | 20.6 (12.6 to 30.9)                | 160.6 (127.1 to 199.6)                 |
| Australia  | Behavioral risks            | 7.1 (6.2 to 8.1)  | 202.6 (175.3 to 231.3)    | 17.3 (11.5 to 24.2)                | 220 (188.2 to 251.9)                   | 4.3 (3.6 to 5)   | 114.4 (96.1 to 133.5)     | 16.5 (10.4 to 24.4)                | 130.8 (108.9 to 154.7)                 |
| Australia  | Alcohol use                 | 3.6 (2.9 to 4.3)  | 104.1 (85.9 to 124)       | 8.9 (5.8 to 12.5)                  | 113 (92.8 to 134.7)                    | 2.3 (1.8 to 2.8) | 61 (48.4 to 74.4)         | 8.7 (5.3 to 13.5)                  | 69.7 (55.1 to 86.6)                    |
| Australia  | Diet high in red meat       | 1.6 (0.8 to 2.3)  | 44.4 (21.6 to 65.4)       | 3.8 (1.8 to 6.3)                   | 48.3 (23.2 to 71.5)                    | 1.1 (0.5 to 1.5) | 27.2 (13.3 to 40.6)       | 3.9 (1.8 to 6.8)                   | 31.2 (15.3 to 46.6)                    |
| Australia  | Low physical activity       | 0.4 (0.1 to 0.7)  | 8 (2.9 to 15.7)           | 0.8 (0.3 to 1.7)                   | 8.7 (3.2 to 17.4)                      | 0.3 (0.1 to 0.6) | 7 (2.2 to 13.4)           | 1.1 (0.3 to 2.2)                   | 8 (2.6 to 15.3)                        |
| Australia  | Smoking                     | 2 (1.4 to 2.5)    | 57.1 (41.3 to 74)         | 4.8 (2.8 to 7.3)                   | 61.9 (44.8 to 80.8)                    | 0.9 (0.6 to 1.2) | 25.1 (17.7 to 33.1)       | 3.6 (2 to 5.7)                     | 28.7 (20 to 37.7)                      |
| Australia  | Secondhand smoke            | 0.4 (0.1 to 0.7)  | 13.3 (3.2 to 22.9)        | 1.1 (0.2 to 2)                     | 14.4 (3.5 to 24.8)                     | 0.2 (0.1 to 0.4) | 6.3 (1.5 to 11.1)         | 0.9 (0.2 to 1.7)                   | 7.2 (1.7 to 12.6)                      |
| Australia  | Metabolic risks             | 1.9 (0.7 to 3.5)  | 33.6 (3.2 to 68.9)        | 3.5 (0.7 to 7)                     | 37 (4.1 to 74.9)                       | 2 (0.8 to 3.7)   | 34.5 (6.5 to 67.7)        | 5.6 (1.3 to 11.5)                  | 40.1 (8.5 to 78.3)                     |
| Australia  | High body-mass index        | 1.1 (0.2 to 2.2)  | 16.1 (-6 to 40.2)         | 1.7 (-0.3 to 4.3)                  | 17.9 (-6.1 to 43.8)                    | 1.1 (0.3 to 2.2) | 15.9 (-3.3 to 38.9)       | 2.7 (-0.1 to 6.2)                  | 18.6 (-3.4 to 44)                      |
| Australia  | High fasting plasma glucose | 0.9 (0.2 to 2)    | 18.4 (3.4 to 42.5)        | 1.8 (0.3 to 4.6)                   | 20.2 (3.7 to 46.9)                     | 1 (0.2 to 2.3)   | 20.2 (3.8 to 45.9)        | 3.1 (0.6 to 7.9)                   | 23.3 (4.5 to 53.2)                     |
| Austria    | All risk factors            | 8.1 (6.7 to 9.6)  | 217 (180.6 to 252.4)      | 18.3 (12.3 to 25.4)                | 235.3 (196.7 to 274.3)                 | 6 (4.7 to 7.6)   | 139.4 (112.7 to 170.6)    | 17.6 (11.2 to 26.2)                | 157 (126.7 to 192.3)                   |
| Austria    | Behavioral risks            | 6.7 (5.7 to 7.6)  | 190.2 (162.7 to 216.4)    | 15.9 (10.8 to 22.1)                | 206 (175.4 to 234.7)                   | 4.5 (3.8 to 5.2) | 112.9 (95.9 to 131.5)     | 14.3 (9.2 to 21.1)                 | 127.2 (106.8 to 148.8)                 |
| Austria    | Alcohol use                 | 3.6 (3 to 4.3)    | 104.1 (85.8 to 123.8)     | 8.7 (5.8 to 12.6)                  | 112.8 (92.8 to 134.6)                  | 2.3 (1.8 to 2.8) | 57.7 (45.9 to 70.9)       | 7.3 (4.7 to 11.2)                  | 65 (51.3 to 80.4)                      |
| Austria    | Diet high in red meat       | 1.5 (0.7 to 2)    | 41.2 (20.4 to 56.5)       | 3.5 (1.6 to 5.5)                   | 44.7 (22.1 to 61.5)                    | 0.9 (0.4 to 1.3) | 22.7 (11.1 to 31.4)       | 2.9 (1.2 to 4.7)                   | 25.5 (12.3 to 35.6)                    |
| Austria    | Low physical activity       | 0.4 (0.1 to 0.8)  | 9.3 (3.1 to 18.4)         | 0.8 (0.3 to 1.8)                   | 10.1 (3.4 to 20.1)                     | 0.3 (0.1 to 0.6) | 6.8 (2.2 to 12.8)         | 0.9 (0.3 to 1.8)                   | 7.7 (2.5 to 14.7)                      |
| Austria    | Smoking                     | 1.4 (1 to 1.8)    | 42 (30.2 to 55.1)         | 3.5 (2 to 5.3)                     | 45.5 (32.6 to 59.9)                    | 1.1 (0.8 to 1.5) | 30.6 (22 to 39.8)         | 3.9 (2.3 to 6.1)                   | 34.5 (24.7 to 45)                      |
| Austria    | Secondhand smoke            | 0.4 (0.1 to 0.8)  | 14.5 (3.4 to 25.3)        | 1.2 (0.3 to 2.2)                   | 15.6 (3.7 to 27.3)                     | 0.3 (0.1 to 0.5) | 7.6 (1.9 to 13.2)         | 0.9 (0.2 to 1.8)                   | 8.5 (2.1 to 14.9)                      |
| Austria    | Metabolic risks             | 1.9 (0.7 to 3.6)  | 36.2 (9.5 to 72.2)        | 3.2 (0.9 to 6.4)                   | 39.4 (10.4 to 77.9)                    | 2.1 (0.8 to 3.8) | 36 (10.5 to 70.3)         | 4.5 (1.3 to 9.4)                   | 40.6 (11.8 to 78.8)                    |
| Austria    | High body-mass index        | 1 (0.2 to 2.2)    | 17.4 (-1 to 40.9)         | 1.5 (0 to 3.5)                     | 18.9 (-1.2 to 44.5)                    | 1 (0.3 to 2)     | 14.5 (0.2 to 33.2)        | 1.8 (-0.1 to 4.3)                  | 16.3 (0.2 to 38.1)                     |
| Austria    | High fasting plasma glucose | 1 (0.2 to 2.2)    | 19.9 (3.6 to 45.8)        | 1.8 (0.3 to 4.5)                   | 21.7 (3.9 to 49.9)                     | 1.2 (0.2 to 2.7) | 23.1 (4.3 to 52.2)        | 3 (0.6 to 7.5)                     | 26.1 (4.9 to 58.5)                     |
| Azerbaijan | All risk factors            | 3.1 (2 to 4.3)    | 86.7 (55 to 121.9)        | 3.1 (1.8 to 4.8)                   | 89.9 (56.7 to 125.8)                   | 3.9 (2.3 to 6)   | 99.3 (55.6 to 154.9)      | 4.8 (2.5 to 8)                     | 104.1 (58.6 to 162.2)                  |
| Azerbaijan | Behavioral risks            | 2.2 (1.6 to 2.9)  | 72.8 (52.6 to 96)         | 2.5 (1.5 to 3.7)                   | 75.2 (54.2 to 99.2)                    | 2.1 (1.4 to 3)   | 67 (44 to 93.4)           | 3.2 (1.8 to 4.9)                   | 70.1 (45.8 to 97.8)                    |
| Azerbaijan | Alcohol use                 | 1 (0.7 to 1.4)    | 36.6 (25.4 to 49.8)       | 1.2 (0.7 to 1.9)                   | 37.8 (26.3 to 51.2)                    | 0.9 (0.6 to 1.3) | 30.1 (18.7 to 44.2)       | 1.4 (0.8 to 2.3)                   | 31.5 (19.6 to 46.5)                    |
| Azerbaijan | Diet high in red meat       | 0.4 (0.1 to 0.5)  | 12.4 (2.6 to 17.1)        | 0.4 (0.1 to 0.7)                   | 12.8 (2.7 to 17.6)                     | 0.5 (0.1 to 0.7) | 15.4 (4.4 to 23.3)        | 0.7 (0.2 to 1.2)                   | 16.1 (4.6 to 24.5)                     |
| Azerbaijan | Low physical activity       | 0.1 (0.1 to 0.2)  | 3 (1.9 to 5.9)            | 0.1 (0.1 to 0.2)                   | 3.1 (2 to 6.1)                         | 0.1 (0.1 to 0.2) | 3.2 (1.8 to 6.1)          | 0.2 (0.1 to 0.3)                   | 3.4 (2 to 6.4)                         |
| Azerbaijan | Smoking                     | 0.1 (0 to 0.1)    | 2 (1 to 3.2)              | 0.1 (0 to 0.1)                     | 2 (1 to 3.4)                           | 0.1 (0 to 0.1)   | 2.3 (1 to 3.9)            | 0.1 (0 to 0.2)                     | 2.4 (1.1 to 4.1)                       |
| Azerbaijan | Secondhand smoke            | 0.7 (0.2 to 1.2)  | 22 (5.4 to 38.8)          | 0.7 (0.2 to 1.4)                   | 22.8 (5.6 to 39.9)                     | 0.6 (0.2 to 1.1) | 19.2 (4.9 to 33.8)        | 0.9 (0.2 to 1.7)                   | 20.1 (5.2 to 35.5)                     |
| Azerbaijan | Metabolic risks             | 1 (0.1 to 2.1)    | 15.4 (-12.5 to 46.1)      | 0.7 (-0.3 to 1.9)                  | 16.1 (-12.7 to 47.6)                   | 2 (0.5 to 4)     | 36.3 (-2.7 to 89)         | 1.8 (0 to 4.4)                     | 38.2 (-2.6 to 93.6)                    |

| Location   | Risk factor                 | 1990              |                           |                                    |                                        | 2019              |                           |                                    |                                        |
|------------|-----------------------------|-------------------|---------------------------|------------------------------------|----------------------------------------|-------------------|---------------------------|------------------------------------|----------------------------------------|
|            |                             | Deaths            | YLLs (Years of Life Lost) | YLDs (Years Lived with Disability) | DALYs (Disability-Adjusted Life Years) | Deaths            | YLLs (Years of Life Lost) | YLDs (Years Lived with Disability) | DALYs (Disability-Adjusted Life Years) |
| Azerbaijan | High body-mass index        | 0.4 (-0.2 to 1.1) | -2.4 (-22.9 to 14.9)      | 0.1 (-0.7 to 0.8)                  | -2.3 (-23.5 to 15.4)                   | 0.8 (-0.1 to 1.8) | 5.3 (-19.2 to 30.4)       | 0.3 (-0.9 to 1.5)                  | 5.6 (-19.9 to 31.7)                    |
| Azerbaijan | High fasting plasma glucose | 0.7 (0.1 to 1.6)  | 18.3 (3.4 to 43.1)        | 0.7 (0.1 to 1.6)                   | 19 (3.5 to 44.6)                       | 1.3 (0.2 to 3)    | 33 (5.8 to 77.1)          | 1.6 (0.3 to 4)                     | 34.6 (6.1 to 81)                       |
| Bahamas    | All risk factors            | 8.2 (5.6 to 11.5) | 221.6 (148.3 to 305.6)    | 9.8 (5.9 to 15)                    | 231.4 (154.7 to 320.3)                 | 8.6 (5.1 to 13.3) | 208.5 (116.5 to 330)      | 11.8 (6.2 to 19.2)                 | 220.2 (123.2 to 349.2)                 |
| Bahamas    | Behavioral risks            | 5.2 (4 to 6.4)    | 166 (128.2 to 204.4)      | 6.9 (4.5 to 9.8)                   | 173 (133.7 to 212.8)                   | 4.4 (3 to 5.9)    | 131.4 (88.5 to 183.5)     | 7 (4.1 to 10.6)                    | 138.4 (92.9 to 192.6)                  |
| Bahamas    | Alcohol use                 | 2.4 (1.8 to 3.2)  | 84.8 (63.1 to 111.5)      | 3.5 (2.1 to 5.1)                   | 88.3 (65.4 to 116.5)                   | 1.6 (0.7 to 2.5)  | 53 (24.8 to 85.7)         | 2.7 (1.1 to 4.7)                   | 55.8 (25.9 to 89.6)                    |
| Bahamas    | Diet high in red meat       | 1.3 (0.5 to 1.8)  | 41.4 (16 to 56.7)         | 1.7 (0.6 to 2.7)                   | 43.1 (16.7 to 58.9)                    | 1.3 (0.5 to 1.9)  | 39.6 (15.3 to 58.7)       | 2.1 (0.8 to 3.5)                   | 41.7 (16.1 to 62)                      |
| Bahamas    | Low physical activity       | 0.6 (0.2 to 1.1)  | 14 (4.8 to 27.8)          | 0.6 (0.2 to 1.4)                   | 14.7 (5 to 29.1)                       | 0.7 (0.2 to 1.3)  | 15.7 (5.1 to 31.1)        | 0.9 (0.3 to 1.9)                   | 16.6 (5.4 to 33)                       |
| Bahamas    | Smoking                     | 0.6 (0.4 to 0.9)  | 16.9 (10.7 to 24.3)       | 0.7 (0.4 to 1.2)                   | 17.7 (11.1 to 25.5)                    | 0.6 (0.3 to 0.8)  | 14.2 (8.6 to 20.9)        | 0.8 (0.4 to 1.3)                   | 15 (9.1 to 22)                         |
| Bahamas    | Secondhand smoke            | 0.6 (0.1 to 1)    | 18.4 (4.2 to 33.3)        | 0.8 (0.2 to 1.5)                   | 19.2 (4.4 to 34.6)                     | 0.5 (0.1 to 0.9)  | 15.4 (3.3 to 28.4)        | 0.8 (0.2 to 1.6)                   | 16.2 (3.5 to 29.9)                     |
| Bahamas    | Metabolic risks             | 3.5 (1 to 6.9)    | 64.2 (-2.6 to 151.5)      | 3.3 (0.3 to 7.5)                   | 67.5 (-2.4 to 160)                     | 4.7 (1.5 to 9.5)  | 87.3 (5.9 to 199.9)       | 5.4 (0.7 to 12.1)                  | 92.7 (7 to 209.7)                      |
| Bahamas    | High body-mass index        | 1.1 (-0.2 to 2.7) | 6.1 (-32.6 to 44.2)       | 0.7 (-1 to 2.5)                    | 6.8 (-33.8 to 46.3)                    | 1.5 (-0.1 to 3.4) | 8.7 (-35.8 to 52)         | 0.9 (-1.4 to 3.4)                  | 9.7 (-36.7 to 55.2)                    |
| Bahamas    | High fasting plasma glucose | 2.5 (0.5 to 5.7)  | 61.1 (11.7 to 140.8)      | 2.8 (0.5 to 6.9)                   | 63.9 (12.1 to 147.1)                   | 3.5 (0.7 to 7.9)  | 83.2 (16 to 189.6)        | 4.7 (0.9 to 11.4)                  | 87.9 (16.8 to 201.1)                   |
| Bahrain    | All risk factors            | 6.6 (3.9 to 10.1) | 150.9 (86.1 to 233.6)     | 5.8 (3.1 to 9.6)                   | 156.7 (89.6 to 242.3)                  | 7.7 (4.2 to 12.6) | 150.1 (73.9 to 255.5)     | 10.4 (4.8 to 18.4)                 | 160.5 (79.3 to 271.3)                  |
| Bahrain    | Behavioral risks            | 2.9 (2.1 to 3.7)  | 78.8 (55.4 to 100.9)      | 2.9 (1.8 to 4.4)                   | 81.7 (58 to 104.2)                     | 2.2 (1.5 to 3.1)  | 53.9 (35.9 to 74.2)       | 3.8 (2.3 to 5.8)                   | 57.6 (38.2 to 79.5)                    |
| Bahrain    | Alcohol use                 | 0.5 (0.3 to 0.6)  | 14.2 (10.1 to 19.6)       | 0.5 (0.3 to 0.8)                   | 14.7 (10.5 to 20.2)                    | 0.2 (0.1 to 0.3)  | 5.1 (3.1 to 7.4)          | 0.4 (0.2 to 0.6)                   | 5.5 (3.4 to 7.9)                       |
| Bahrain    | Diet high in red meat       | 0.7 (0.2 to 1)    | 19 (5.1 to 28.8)          | 0.7 (0.2 to 1.2)                   | 19.7 (5.3 to 30)                       | 0.6 (0.1 to 0.9)  | 15.3 (3.7 to 23.7)        | 1.1 (0.3 to 1.8)                   | 16.4 (4 to 25.4)                       |
| Bahrain    | Low physical activity       | 0.6 (0.2 to 1.1)  | 14.1 (5.4 to 25)          | 0.6 (0.2 to 1)                     | 14.7 (5.6 to 26.1)                     | 0.7 (0.3 to 1.2)  | 13.9 (5.4 to 24.7)        | 1 (0.4 to 1.9)                     | 14.9 (5.7 to 26.5)                     |
| Bahrain    | Smoking                     | 0.6 (0.4 to 0.9)  | 16.2 (10.3 to 23.9)       | 0.6 (0.3 to 1)                     | 16.8 (10.7 to 24.7)                    | 0.3 (0.2 to 0.5)  | 7.8 (4.9 to 12)           | 0.5 (0.3 to 0.9)                   | 8.4 (5.2 to 12.9)                      |
| Bahrain    | Secondhand smoke            | 0.7 (0.1 to 1.1)  | 18.8 (3.8 to 33.2)        | 0.7 (0.2 to 1.3)                   | 19.4 (4 to 34.1)                       | 0.5 (0.1 to 0.9)  | 13.6 (3 to 24.3)          | 0.9 (0.2 to 1.8)                   | 14.5 (3.2 to 25.9)                     |
| Bahrain    | Metabolic risks             | 4.2 (1.4 to 7.7)  | 81.7 (17.2 to 164.7)      | 3.3 (0.8 to 6.7)                   | 85 (18.1 to 171.3)                     | 6 (2.3 to 11.1)   | 106.4 (28 to 210.8)       | 7.3 (1.8 to 15)                    | 113.7 (29.4 to 224.7)                  |
| Bahrain    | High body-mass index        | 1.6 (0.2 to 3.4)  | 22.6 (-13.7 to 64.8)      | 0.9 (-0.4 to 2.6)                  | 23.5 (-14.2 to 67.1)                   | 1.8 (0.3 to 3.6)  | 19.8 (-14.9 to 56)        | 1.2 (-1.3 to 3.7)                  | 21 (-16.1 to 60)                       |
| Bahrain    | High fasting plasma glucose | 2.9 (0.6 to 6.4)  | 64.5 (12.5 to 143)        | 2.5 (0.5 to 6)                     | 67 (13.1 to 148.3)                     | 4.8 (1.1 to 9.9)  | 96.2 (21 to 200.9)        | 6.8 (1.5 to 14.8)                  | 103 (22.5 to 215.6)                    |
| Bangladesh | All risk factors            | 1.4 (0.7 to 2.5)  | 41.9 (18.6 to 71.1)       | 1 (0.4 to 1.8)                     | 42.9 (19 to 72.8)                      | 1.8 (0.9 to 3.1)  | 47.7 (22.1 to 82.3)       | 1.7 (0.8 to 3.1)                   | 49.4 (22.8 to 84.9)                    |
| Bangladesh | Behavioral risks            | 0.9 (0.4 to 1.4)  | 27.1 (11.2 to 45)         | 0.6 (0.3 to 1)                     | 27.7 (11.5 to 46)                      | 0.9 (0.4 to 1.4)  | 25.1 (12.3 to 40)         | 0.9 (0.4 to 1.5)                   | 25.9 (12.7 to 41.4)                    |
| Bangladesh | Alcohol use                 | 0 (0 to 0)        | 0.4 (0 to 0.8)            | 0 (0 to 0)                         | 0.4 (0 to 0.8)                         | 0 (0 to 0.1)      | 1.2 (0.3 to 2.1)          | 0 (0 to 0.1)                       | 1.2 (0.3 to 2.2)                       |
| Bangladesh | Diet high in red meat       | 0.1 (0 to 0.1)    | 2.5 (1 to 3.8)            | 0.1 (0 to 0.1)                     | 2.5 (1 to 3.9)                         | 0.1 (0 to 0.1)    | 2.6 (0.9 to 4.1)          | 0.1 (0 to 0.2)                     | 2.7 (1 to 4.3)                         |
| Bangladesh | Low physical activity       | 0.1 (0.1 to 0.2)  | 2.5 (1.5 to 4.7)          | 0.1 (0 to 0.1)                     | 2.6 (1.5 to 4.8)                       | 0.1 (0.1 to 0.2)  | 2.7 (1.5 to 5)            | 0.1 (0.1 to 0.2)                   | 2.8 (1.6 to 5.2)                       |
| Bangladesh | Smoking                     | 0.1 (0.1 to 0.2)  | 2.7 (1.3 to 4.5)          | 0.1 (0 to 0.1)                     | 2.8 (1.3 to 4.7)                       | 0.1 (0 to 0.1)    | 1.9 (0.9 to 3.2)          | 0.1 (0 to 0.1)                     | 2 (0.9 to 3.3)                         |
| Bangladesh | Secondhand smoke            | 0.6 (0.1 to 1.1)  | 19.4 (4.2 to 36.3)        | 0.4 (0.1 to 0.8)                   | 19.8 (4.3 to 37.2)                     | 0.5 (0.1 to 1)    | 17.1 (3.9 to 31.2)        | 0.6 (0.1 to 1.1)                   | 17.7 (4.1 to 32.2)                     |
| Bangladesh | Metabolic risks             | 0.6 (0.1 to 1.5)  | 15.8 (2.3 to 39.1)        | 0.4 (0.1 to 1)                     | 16.2 (2.4 to 39.9)                     | 1 (0.3 to 2.3)    | 24 (4.5 to 56.2)          | 0.9 (0.2 to 2.1)                   | 24.9 (4.7 to 58.1)                     |
| Bangladesh | High body-mass index        | 0 (0 to 0.2)      | 0.2 (-2.1 to 2.6)         | 0 (0 to 0.1)                       | 0.2 (-2.1 to 2.7)                      | 0.2 (0 to 0.4)    | 1.9 (-3.4 to 8.6)         | 0.1 (-0.1 to 0.3)                  | 2 (-3.5 to 8.8)                        |
| Bangladesh | High fasting plasma glucose | 0.6 (0.1 to 1.4)  | 15.7 (2.6 to 38.6)        | 0.4 (0.1 to 1)                     | 16.1 (2.7 to 39.3)                     | 0.9 (0.2 to 2.1)  | 22.5 (4.1 to 54.5)        | 0.8 (0.1 to 2.1)                   | 23.3 (4.2 to 56.3)                     |
| Barbados   | All risk factors            | 6.9 (4.4 to 10.2) | 164.9 (102.9 to 239.1)    | 8.4 (4.7 to 13.1)                  | 173.3 (108.3 to 251.5)                 | 9.4 (5.6 to 14.6) | 213.5 (128.3 to 333)      | 14.5 (8.1 to 23.9)                 | 228 (135.9 to 354.9)                   |
| Barbados   | Behavioral risks            | 3.6 (2.7 to 4.4)  | 107.2 (81.1 to 130.3)     | 5.1 (3.3 to 7.2)                   | 112.3 (84.4 to 136.8)                  | 4.2 (3 to 5.4)    | 117 (84.1 to 152.4)       | 7.5 (4.9 to 11.1)                  | 124.5 (89.4 to 162.9)                  |
| Barbados   | Alcohol use                 | 1.3 (0.9 to 1.7)  | 42.3 (30.8 to 54.5)       | 2 (1.2 to 2.9)                     | 44.3 (31.9 to 57.1)                    | 1.8 (1.3 to 2.5)  | 56.7 (39.1 to 77.4)       | 3.6 (2.2 to 5.5)                   | 60.3 (41.7 to 81.8)                    |
| Barbados   | Diet high in red meat       | 1.1 (0.4 to 1.5)  | 32.4 (12.7 to 43.6)       | 1.5 (0.6 to 2.4)                   | 33.9 (13.3 to 45.6)                    | 1 (0.3 to 1.4)    | 26.2 (7.5 to 38.7)        | 1.7 (0.5 to 2.8)                   | 27.9 (7.9 to 41)                       |
| Barbados   | Low physical activity       | 0.6 (0.2 to 1.1)  | 13.7 (4.5 to 25.9)        | 0.7 (0.2 to 1.4)                   | 14.4 (4.8 to 27.2)                     | 0.8 (0.3 to 1.5)  | 17.7 (5.6 to 33)          | 1.2 (0.4 to 2.4)                   | 18.9 (6.1 to 35)                       |
| Barbados   | Smoking                     | 0.4 (0.3 to 0.6)  | 12.4 (7.7 to 18.3)        | 0.6 (0.3 to 0.9)                   | 13 (8.1 to 19.1)                       | 0.4 (0.2 to 0.6)  | 11.1 (6.8 to 17)          | 0.7 (0.4 to 1.2)                   | 11.8 (7.2 to 18.1)                     |
| Barbados   | Secondhand smoke            | 0.4 (0.1 to 0.7)  | 11.7 (2.6 to 21.1)        | 0.5 (0.1 to 1.1)                   | 12.3 (2.7 to 22.1)                     | 0.4 (0.1 to 0.7)  | 10.7 (2.6 to 19.8)        | 0.7 (0.1 to 1.3)                   | 11.4 (2.8 to 21.2)                     |

| Location | Risk factor                 | 1990               |                           |                                    |                                        | 2019              |                           |                                    |                                        |
|----------|-----------------------------|--------------------|---------------------------|------------------------------------|----------------------------------------|-------------------|---------------------------|------------------------------------|----------------------------------------|
|          |                             | Deaths             | YLLs (Years of Life Lost) | YLDs (Years Lived with Disability) | DALYs (Disability-Adjusted Life Years) | Deaths            | YLLs (Years of Life Lost) | YLDs (Years Lived with Disability) | DALYs (Disability-Adjusted Life Years) |
| Barbados | Metabolic risks             | 3.7 (1.2 to 7.1)   | 65 (5.9 to 141)           | 3.7 (0.7 to 8)                     | 68.7 (6.5 to 147.6)                    | 5.8 (2.1 to 11.1) | 108.9 (24.2 to 230.9)     | 7.8 (1.9 to 16.3)                  | 116.7 (26 to 247.6)                    |
| Barbados | High body-mass index        | 1.2 (0 to 2.9)     | 10.1 (-22.3 to 44.1)      | 0.9 (-0.8 to 2.8)                  | 11 (-23 to 46.3)                       | 2.1 (0.4 to 4.4)  | 27.9 (-15.6 to 79.1)      | 2.2 (-0.7 to 6)                    | 30.2 (-16.5 to 84.4)                   |
| Barbados | High fasting plasma glucose | 2.6 (0.5 to 5.9)   | 58.2 (11.3 to 131.2)      | 3 (0.6 to 7.3)                     | 61.2 (11.9 to 138.3)                   | 4.1 (0.8 to 9)    | 87.5 (17.4 to 200.4)      | 6 (1.2 to 14.3)                    | 93.5 (18.6 to 214.3)                   |
| Belarus  | All risk factors            | 4.8 (3.7 to 5.8)   | 146.2 (113.6 to 177.5)    | 7.7 (4.9 to 10.8)                  | 153.8 (120.2 to 186.9)                 | 4.1 (2.8 to 5.7)  | 113.5 (78.2 to 161.2)     | 9.6 (5.7 to 14.4)                  | 123.1 (84.8 to 172.7)                  |
| Belarus  | Behavioral risks            | 3.8 (3.1 to 4.4)   | 128.8 (105.3 to 150.6)    | 6.6 (4.3 to 9.1)                   | 135.4 (110.1 to 158.2)                 | 2.9 (2.1 to 3.9)  | 91.4 (64.9 to 122.7)      | 7.6 (4.6 to 11.4)                  | 99 (69.9 to 132.2)                     |
| Belarus  | Alcohol use                 | 1.9 (1.5 to 2.3)   | 65.9 (52.1 to 80.1)       | 3.3 (2.2 to 4.8)                   | 69.3 (54.7 to 84.3)                    | 1.5 (1.1 to 2.1)  | 48.9 (33.9 to 68.4)       | 4.1 (2.4 to 6.2)                   | 52.9 (36.9 to 74.4)                    |
| Belarus  | Diet high in red meat       | 1 (0.5 to 1.3)     | 32.3 (16.4 to 43.7)       | 1.7 (0.8 to 2.7)                   | 34 (17.1 to 46)                        | 0.8 (0.3 to 1.2)  | 22.3 (10.1 to 35)         | 1.9 (0.8 to 3.2)                   | 24.1 (11.2 to 37.4)                    |
| Belarus  | Low physical activity       | 0.1 (0.1 to 0.2)   | 3.3 (2.1 to 6.2)          | 0.2 (0.1 to 0.4)                   | 3.5 (2.2 to 6.5)                       | 0.1 (0.1 to 0.2)  | 2.7 (1.5 to 5.1)          | 0.2 (0.1 to 0.5)                   | 2.9 (1.6 to 5.5)                       |
| Belarus  | Smoking                     | 0.6 (0.4 to 0.9)   | 21.4 (12.2 to 32)         | 1.1 (0.5 to 1.8)                   | 22.5 (12.9 to 33.7)                    | 0.4 (0.3 to 0.7)  | 14.5 (8.3 to 22.5)        | 1.2 (0.6 to 2)                     | 15.7 (8.9 to 24.4)                     |
| Belarus  | Secondhand smoke            | 0.5 (0.1 to 0.9)   | 17.2 (4.2 to 29.7)        | 0.9 (0.2 to 1.6)                   | 18.1 (4.4 to 31.3)                     | 0.4 (0.1 to 0.7)  | 11.3 (2.5 to 20.8)        | 0.9 (0.2 to 1.8)                   | 12.3 (2.8 to 22.5)                     |
| Belarus  | Metabolic risks             | 1.2 (0.3 to 2.3)   | 21.3 (-4.2 to 50.3)       | 1.3 (-0.1 to 3.1)                  | 22.6 (-4.1 to 53)                      | 1.4 (0.5 to 2.6)  | 27.7 (5.1 to 57.5)        | 2.5 (0.5 to 5.1)                   | 30.2 (5.8 to 62.2)                     |
| Belarus  | High body-mass index        | 0.6 (-0.1 to 1.4)  | 6.5 (-13.7 to 25.5)       | 0.5 (-0.5 to 1.7)                  | 7.1 (-14.1 to 27.3)                    | 0.9 (0.2 to 1.7)  | 15.2 (-2.2 to 35.7)       | 1.4 (-0.1 to 3.3)                  | 16.5 (-2.3 to 38.7)                    |
| Belarus  | High fasting plasma glucose | 0.6 (0.1 to 1.3)   | 15.4 (2.7 to 35.6)        | 0.9 (0.1 to 2.1)                   | 16.3 (2.9 to 37.7)                     | 0.6 (0.1 to 1.4)  | 13.5 (2.4 to 33.9)        | 1.2 (0.2 to 3.1)                   | 14.7 (2.6 to 36.6)                     |
| Belgium  | All risk factors            | 12.1 (9.9 to 14.3) | 316.9 (264.5 to 369)      | 24.8 (16.4 to 34.4)                | 341.6 (285.4 to 396.1)                 | 8.3 (6.6 to 10.4) | 194.1 (157.9 to 236.7)    | 25.2 (16 to 37.9)                  | 219.3 (177.5 to 269.1)                 |
| Belgium  | Behavioral risks            | 9.9 (8.5 to 11.3)  | 278.4 (240 to 316.4)      | 21.5 (14.5 to 29.9)                | 299.9 (257.2 to 341.3)                 | 6.3 (5.3 to 7.3)  | 158.5 (135.7 to 185.1)    | 20.5 (12.9 to 30.4)                | 179 (151.7 to 209.6)                   |
| Belgium  | Alcohol use                 | 5.7 (4.6 to 6.8)   | 158.3 (129.4 to 188.9)    | 12.2 (8.1 to 17.3)                 | 170.5 (139.2 to 203.3)                 | 3.5 (2.8 to 4.3)  | 88.6 (70.6 to 108.5)      | 11.4 (7.1 to 17.5)                 | 100 (79.5 to 123.6)                    |
| Belgium  | Diet high in red meat       | 1.6 (0.7 to 2.1)   | 44.9 (20.9 to 59.4)       | 3.5 (1.4 to 5.4)                   | 48.3 (22.3 to 64.2)                    | 1.2 (0.6 to 1.7)  | 31 (15.5 to 42.6)         | 4 (1.8 to 6.7)                     | 35 (17.3 to 48.5)                      |
| Belgium  | Low physical activity       | 0.6 (0.2 to 1.1)   | 13 (4.3 to 25.6)          | 1.1 (0.3 to 2.3)                   | 14.1 (4.8 to 28)                       | 0.5 (0.2 to 0.8)  | 9.1 (2.9 to 17)           | 1.2 (0.4 to 2.5)                   | 10.3 (3.2 to 19.2)                     |
| Belgium  | Smoking                     | 2.5 (1.8 to 3.3)   | 74.9 (51.3 to 98.6)       | 5.7 (3.2 to 8.7)                   | 80.6 (55.1 to 106.7)                   | 1.5 (1.1 to 1.9)  | 39.4 (28.6 to 51.2)       | 5.1 (2.9 to 8)                     | 44.5 (32 to 58.2)                      |
| Belgium  | Secondhand smoke            | 0.6 (0.1 to 1.1)   | 19.2 (4.5 to 33.4)        | 1.5 (0.3 to 2.8)                   | 20.7 (4.9 to 36.1)                     | 0.3 (0.1 to 0.5)  | 8.2 (1.9 to 14.2)         | 1 (0.2 to 2)                       | 9.3 (2.2 to 16.1)                      |
| Belgium  | Metabolic risks             | 2.9 (1.1 to 5.5)   | 53.3 (12.6 to 106.6)      | 4.5 (1.1 to 9)                     | 57.8 (13.9 to 115.1)                   | 2.8 (1.1 to 5.1)  | 49.8 (15.1 to 97.9)       | 6.6 (1.9 to 13.6)                  | 56.4 (17.4 to 109.9)                   |
| Belgium  | High body-mass index        | 1.4 (0.3 to 2.9)   | 21.1 (-3.6 to 51.1)       | 1.8 (-0.1 to 4.4)                  | 22.9 (-3.6 to 55.1)                    | 1.2 (0.3 to 2.5)  | 19.3 (0.4 to 43.8)        | 2.6 (0 to 6)                       | 21.9 (0.4 to 49.4)                     |
| Belgium  | High fasting plasma glucose | 1.6 (0.3 to 3.7)   | 33.9 (6.5 to 77.9)        | 2.8 (0.5 to 7.1)                   | 36.8 (7 to 84.4)                       | 1.7 (0.3 to 3.8)  | 32.6 (6.4 to 73.7)        | 4.3 (0.8 to 10.9)                  | 36.9 (7.2 to 83.5)                     |
| Belize   | All risk factors            | 1.8 (1.1 to 2.7)   | 42.5 (25.7 to 63.6)       | 1.8 (1 to 2.9)                     | 44.4 (27 to 65.9)                      | 2.5 (1.5 to 4.1)  | 59.6 (31.6 to 96.6)       | 3 (1.4 to 5.1)                     | 62.6 (33 to 100.9)                     |
| Belize   | Behavioral risks            | 0.9 (0.7 to 1.2)   | 25.9 (19.3 to 33.3)       | 1 (0.7 to 1.5)                     | 26.9 (20.1 to 34.4)                    | 1.1 (0.8 to 1.4)  | 31.6 (22.9 to 41.7)       | 1.5 (0.9 to 2.2)                   | 33.1 (24 to 43.3)                      |
| Belize   | Alcohol use                 | 0.2 (0.2 to 0.3)   | 7.9 (5.8 to 10.5)         | 0.3 (0.2 to 0.4)                   | 8.2 (6 to 10.9)                        | 0.3 (0.2 to 0.4)  | 10.7 (7.5 to 14.8)        | 0.5 (0.3 to 0.7)                   | 11.2 (7.8 to 15.6)                     |
| Belize   | Diet high in red meat       | 0.2 (0 to 0.3)     | 5.4 (1.1 to 7.7)          | 0.2 (0 to 0.3)                     | 5.6 (1.1 to 7.9)                       | 0.2 (0 to 0.3)    | 5.8 (1.1 to 8.7)          | 0.3 (0.1 to 0.5)                   | 6.1 (1.2 to 9.1)                       |
| Belize   | Low physical activity       | 0.2 (0.1 to 0.3)   | 3.7 (1.3 to 7.1)          | 0.2 (0.1 to 0.3)                   | 3.8 (1.4 to 7.3)                       | 0.2 (0.1 to 0.4)  | 5.2 (1.6 to 9.9)          | 0.3 (0.1 to 0.5)                   | 5.5 (1.7 to 10.4)                      |
| Belize   | Smoking                     | 0.2 (0.1 to 0.3)   | 4.4 (2.8 to 6.5)          | 0.2 (0.1 to 0.3)                   | 4.6 (3 to 6.8)                         | 0.2 (0.1 to 0.3)  | 4.5 (2.7 to 6.8)          | 0.2 (0.1 to 0.4)                   | 4.8 (2.9 to 7.1)                       |
| Belize   | Secondhand smoke            | 0.2 (0 to 0.3)     | 5.4 (1.2 to 9.7)          | 0.2 (0 to 0.4)                     | 5.6 (1.3 to 10)                        | 0.2 (0.1 to 0.4)  | 6.6 (1.6 to 11.8)         | 0.3 (0.1 to 0.6)                   | 6.9 (1.6 to 12.3)                      |
| Belize   | Metabolic risks             | 1 (0.3 to 1.9)     | 18.2 (1.8 to 39.4)        | 0.9 (0.2 to 1.9)                   | 19.1 (1.9 to 40.9)                     | 1.6 (0.5 to 3.2)  | 30.5 (2.1 to 68)          | 1.7 (0.2 to 3.6)                   | 32.2 (2.4 to 71.7)                     |
| Belize   | High body-mass index        | 0.3 (0 to 0.8)     | 4.1 (-4.8 to 13.9)        | 0.3 (-0.1 to 0.7)                  | 4.3 (-4.9 to 14.7)                     | 0.6 (0 to 1.3)    | 5.2 (-11.5 to 21.7)       | 0.4 (-0.4 to 1.2)                  | 5.5 (-11.6 to 23.1)                    |
| Belize   | High fasting plasma glucose | 0.7 (0.1 to 1.5)   | 14.8 (2.8 to 34.2)        | 0.6 (0.1 to 1.6)                   | 15.4 (3 to 35.7)                       | 1.1 (0.2 to 2.5)  | 27.2 (5.2 to 62.1)        | 1.4 (0.3 to 3.3)                   | 28.6 (5.5 to 65.3)                     |
| Benin    | All risk factors            | 1.7 (1 to 2.6)     | 43.9 (25.6 to 66.9)       | 1.1 (0.6 to 1.8)                   | 45 (26.2 to 68.7)                      | 2.7 (1.5 to 4.4)  | 64.6 (33.9 to 105.6)      | 1.9 (0.9 to 3.3)                   | 66.5 (34.8 to 108.8)                   |
| Benin    | Behavioral risks            | 1 (0.6 to 1.4)     | 29.3 (19.1 to 41.5)       | 0.7 (0.4 to 1)                     | 30 (19.5 to 42.3)                      | 1.2 (0.8 to 1.7)  | 36.2 (23.4 to 53)         | 1 (0.6 to 1.5)                     | 37.2 (24.1 to 54.4)                    |
| Benin    | Alcohol use                 | 0.4 (0.3 to 0.7)   | 13.9 (8.4 to 20.9)        | 0.3 (0.2 to 0.5)                   | 14.2 (8.5 to 21.3)                     | 0.6 (0.4 to 1)    | 20.3 (11.8 to 31.2)       | 0.5 (0.3 to 0.9)                   | 20.8 (12.1 to 31.9)                    |
| Benin    | Diet high in red meat       | 0.1 (0 to 0.2)     | 4.2 (0.9 to 6.8)          | 0.1 (0 to 0.2)                     | 4.3 (0.9 to 6.9)                       | 0.2 (0 to 0.3)    | 4.4 (1 to 7.6)            | 0.1 (0 to 0.2)                     | 4.5 (1 to 7.8)                         |
| Benin    | Low physical activity       | 0.1 (0.1 to 0.2)   | 2.5 (1.3 to 4.6)          | 0.1 (0 to 0.1)                     | 2.6 (1.3 to 4.7)                       | 0.1 (0.1 to 0.3)  | 3.3 (1.6 to 6.3)          | 0.1 (0 to 0.2)                     | 3.4 (1.7 to 6.5)                       |

| Location                         | Risk factor                 | 1990             |                           |                                    |                                        | 2019             |                           |                                    |                                        |
|----------------------------------|-----------------------------|------------------|---------------------------|------------------------------------|----------------------------------------|------------------|---------------------------|------------------------------------|----------------------------------------|
|                                  |                             | Deaths           | YLLs (Years of Life Lost) | YLDs (Years Lived with Disability) | DALYs (Disability-Adjusted Life Years) | Deaths           | YLLs (Years of Life Lost) | YLDs (Years Lived with Disability) | DALYs (Disability-Adjusted Life Years) |
| Benin                            | Smoking                     | 0.1 (0 to 0.2)   | 2.6 (1.1 to 4.4)          | 0.1 (0 to 0.1)                     | 2.6 (1.1 to 4.5)                       | 0.1 (0 to 0.1)   | 2.2 (1 to 3.8)            | 0.1 (0 to 0.1)                     | 2.3 (1.1 to 3.9)                       |
| Benin                            | Secondhand smoke            | 0.2 (0 to 0.4)   | 6.9 (1.5 to 12.7)         | 0.2 (0 to 0.3)                     | 7.1 (1.6 to 13)                        | 0.2 (0 to 0.4)   | 7 (1.6 to 13.2)           | 0.2 (0 to 0.4)                     | 7.2 (1.6 to 13.5)                      |
| Benin                            | Metabolic risks             | 0.8 (0.2 to 1.6) | 15.8 (2.4 to 34.7)        | 0.4 (0.1 to 1)                     | 16.2 (2.5 to 35.6)                     | 1.6 (0.5 to 3.2) | 30.6 (5.5 to 66.7)        | 1 (0.2 to 2.1)                     | 31.6 (5.6 to 68.7)                     |
| Benin                            | High body-mass index        | 0.3 (0 to 0.7)   | 4.6 (-2.8 to 14.4)        | 0.1 (0 to 0.4)                     | 4.7 (-2.8 to 14.7)                     | 0.6 (0.1 to 1.4) | 8.7 (-6.8 to 26.3)        | 0.3 (-0.1 to 0.9)                  | 9 (-7 to 27.1)                         |
| Benin                            | High fasting plasma glucose | 0.5 (0.1 to 1.2) | 11.5 (2 to 27.1)          | 0.3 (0.1 to 0.8)                   | 11.8 (2.1 to 27.9)                     | 1.1 (0.2 to 2.5) | 23.2 (4.5 to 55.6)        | 0.7 (0.1 to 1.8)                   | 23.9 (4.6 to 57.5)                     |
| Bermuda                          | All risk factors            | 9.5 (7 to 12.5)  | 224.2 (163.9 to 293.7)    | 13.8 (8.8 to 19.7)                 | 238 (175.7 to 310.6)                   | 5.3 (3.7 to 7.9) | 114.7 (77.7 to 167.4)     | 12.7 (7.8 to 19.8)                 | 127.4 (86.5 to 183.3)                  |
| Bermuda                          | Behavioral risks            | 6.2 (5 to 7.5)   | 168.3 (133.4 to 203.7)    | 10 (6.7 to 14.1)                   | 178.2 (140.2 to 216.1)                 | 3.1 (2.3 to 4.2) | 81.1 (59.7 to 108.6)      | 8.7 (5.6 to 13)                    | 89.8 (66.5 to 120.8)                   |
| Bermuda                          | Alcohol use                 | 2.5 (1.9 to 3.3) | 77.4 (58.4 to 100.7)      | 4.5 (2.9 to 6.6)                   | 81.8 (61.4 to 106.5)                   | 1.1 (0.8 to 1.6) | 34.3 (23.4 to 49.1)       | 3.6 (2.2 to 5.7)                   | 37.9 (25.8 to 54)                      |
| Bermuda                          | Diet high in red meat       | 1.6 (0.7 to 2.2) | 43 (19.5 to 58.7)         | 2.5 (1.1 to 4)                     | 45.6 (20.6 to 62.4)                    | 0.9 (0.4 to 1.3) | 22.5 (10.2 to 33.8)       | 2.4 (1 to 4)                       | 24.9 (11.4 to 37.4)                    |
| Bermuda                          | Low physical activity       | 0.7 (0.3 to 1.3) | 15.4 (5.4 to 28.6)        | 1 (0.3 to 2)                       | 16.4 (5.7 to 30.4)                     | 0.4 (0.1 to 0.8) | 8.5 (2.7 to 15.8)         | 1 (0.3 to 1.9)                     | 9.4 (2.9 to 17.7)                      |
| Bermuda                          | Smoking                     | 1.2 (0.8 to 1.7) | 29.3 (17.6 to 42.5)       | 1.8 (1 to 2.8)                     | 31.1 (18.5 to 45.2)                    | 0.6 (0.4 to 0.9) | 14.4 (9.3 to 21.7)        | 1.6 (0.9 to 2.6)                   | 16 (10.3 to 24.3)                      |
| Bermuda                          | Secondhand smoke            | 0.5 (0.1 to 0.9) | 15.3 (3.6 to 26.6)        | 0.9 (0.2 to 1.7)                   | 16.2 (3.8 to 28.2)                     | 0.3 (0.1 to 0.5) | 7.1 (1.6 to 13.2)         | 0.7 (0.2 to 1.5)                   | 7.8 (1.8 to 14.5)                      |
| Bermuda                          | Metabolic risks             | 3.9 (1.4 to 7.2) | 67.1 (10.9 to 137.1)      | 4.6 (1.1 to 9)                     | 71.7 (12.3 to 146.2)                   | 2.6 (0.9 to 5)   | 40 (5.8 to 86)            | 4.8 (0.9 to 10.1)                  | 44.8 (7 to 95.4)                       |
| Bermuda                          | High body-mass index        | 2.1 (0.5 to 4.3) | 31 (-8.1 to 75.2)         | 2.3 (-0.1 to 5)                    | 33.3 (-8.3 to 79.6)                    | 1.3 (0.3 to 2.7) | 15.2 (-7.5 to 39.9)       | 2 (-0.5 to 4.9)                    | 17.2 (-7.9 to 44.3)                    |
| Bermuda                          | High fasting plasma glucose | 1.9 (0.4 to 4.4) | 38.9 (7.2 to 91.8)        | 2.5 (0.4 to 6.1)                   | 41.4 (7.5 to 96.8)                     | 1.4 (0.3 to 3.4) | 27 (5.1 to 65.4)          | 3.1 (0.6 to 7.7)                   | 30.1 (5.8 to 73.7)                     |
| Bhutan                           | All risk factors            | 1.3 (0.7 to 2.2) | 35.3 (17.7 to 61.4)       | 0.9 (0.4 to 1.6)                   | 36.1 (18.1 to 63)                      | 1.8 (0.9 to 3.1) | 39.9 (18.5 to 74.4)       | 1.6 (0.7 to 3)                     | 41.4 (19.4 to 76.8)                    |
| Bhutan                           | Behavioral risks            | 0.7 (0.4 to 1.1) | 22.4 (12.5 to 35.8)       | 0.5 (0.3 to 0.8)                   | 22.9 (12.8 to 36.4)                    | 0.7 (0.4 to 1)   | 17.4 (10.6 to 27.4)       | 0.7 (0.4 to 1.1)                   | 18 (10.9 to 28.2)                      |
| Bhutan                           | Alcohol use                 | 0.1 (0.1 to 0.2) | 4.9 (2.7 to 7.8)          | 0.1 (0.1 to 0.2)                   | 5 (2.7 to 7.9)                         | 0.1 (0 to 0.1)   | 2 (1 to 3.4)              | 0.1 (0 to 0.1)                     | 2 (1 to 3.5)                           |
| Bhutan                           | Diet high in red meat       | 0.1 (0 to 0.2)   | 3.6 (0.8 to 6.3)          | 0.1 (0 to 0.1)                     | 3.7 (0.9 to 6.4)                       | 0.1 (0 to 0.2)   | 3.6 (0.8 to 6.2)          | 0.1 (0 to 0.3)                     | 3.7 (0.8 to 6.5)                       |
| Bhutan                           | Low physical activity       | 0.2 (0.1 to 0.3) | 3.7 (1.7 to 7.1)          | 0.1 (0 to 0.2)                     | 3.8 (1.8 to 7.2)                       | 0.2 (0.1 to 0.4) | 4 (1.9 to 7.5)            | 0.2 (0.1 to 0.3)                   | 4.2 (1.9 to 7.8)                       |
| Bhutan                           | Smoking                     | 0.1 (0.1 to 0.2) | 4 (2.1 to 7.1)            | 0.1 (0 to 0.2)                     | 4.1 (2.2 to 7.3)                       | 0.1 (0.1 to 0.2) | 3 (1.6 to 5)              | 0.1 (0.1 to 0.2)                   | 3.1 (1.6 to 5.1)                       |
| Bhutan                           | Secondhand smoke            | 0.2 (0 to 0.4)   | 6.7 (1.4 to 13.4)         | 0.1 (0 to 0.3)                     | 6.8 (1.4 to 13.7)                      | 0.2 (0 to 0.3)   | 5.2 (1.2 to 10)           | 0.2 (0 to 0.4)                     | 5.4 (1.2 to 10.3)                      |
| Bhutan                           | Metabolic risks             | 0.6 (0.1 to 1.4) | 13.8 (0.9 to 35.2)        | 0.4 (0.1 to 0.9)                   | 14.1 (1 to 36.2)                       | 1.2 (0.3 to 2.5) | 23.8 (4.2 to 55.6)        | 1 (0.2 to 2.2)                     | 24.8 (4.4 to 57.9)                     |
| Bhutan                           | High body-mass index        | 0.1 (0 to 0.4)   | 1.1 (-5.1 to 6.8)         | 0.1 (-0.1 to 0.2)                  | 1.2 (-5.2 to 7.1)                      | 0.4 (0 to 0.9)   | 4.7 (-5.8 to 16.5)        | 0.2 (-0.2 to 0.7)                  | 4.9 (-6 to 17.1)                       |
| Bhutan                           | High fasting plasma glucose | 0.5 (0.1 to 1.2) | 12.8 (2.2 to 33.1)        | 0.3 (0.1 to 0.9)                   | 13.2 (2.2 to 33.8)                     | 0.9 (0.2 to 2.1) | 19.9 (3.8 to 50.7)        | 0.8 (0.1 to 2.1)                   | 20.7 (3.9 to 52.7)                     |
| Bolivia (Plurinational State of) | All risk factors            | 2.9 (1.8 to 4.6) | 79.5 (48.8 to 121.8)      | 1.9 (1.1 to 3.1)                   | 81.5 (50.1 to 124.7)                   | 4.1 (2.4 to 6.5) | 99.4 (58.1 to 159.3)      | 3.8 (2 to 6.6)                     | 103.2 (60.5 to 164.9)                  |
| Bolivia (Plurinational State of) | Behavioral risks            | 1.8 (1.2 to 2.6) | 58 (38.1 to 83.3)         | 1.3 (0.8 to 2)                     | 59.3 (39 to 85.3)                      | 2 (1.4 to 2.8)   | 60.3 (39.7 to 84.7)       | 2.2 (1.3 to 3.4)                   | 62.5 (41.1 to 87.5)                    |
| Bolivia (Plurinational State of) | Alcohol use                 | 0.7 (0.5 to 1.1) | 24.7 (15.5 to 36.6)       | 0.5 (0.3 to 0.9)                   | 25.2 (15.8 to 37.3)                    | 0.9 (0.6 to 1.3) | 28.6 (18.1 to 42.8)       | 1 (0.6 to 1.6)                     | 29.6 (18.8 to 44.3)                    |
| Bolivia (Plurinational State of) | Diet high in red meat       | 0.6 (0.2 to 0.9) | 18.7 (6.6 to 28.8)        | 0.4 (0.1 to 0.7)                   | 19.1 (6.8 to 29.3)                     | 0.7 (0.2 to 1.1) | 20 (7.3 to 31)            | 0.7 (0.3 to 1.3)                   | 20.8 (7.6 to 32.3)                     |
| Bolivia (Plurinational State of) | Low physical activity       | 0.1 (0 to 0.2)   | 1.8 (1.1 to 5.1)          | 0 (0 to 0.1)                       | 1.9 (1.2 to 5.2)                       | 0.1 (0.1 to 0.2) | 2.2 (1.3 to 5.3)          | 0.1 (0 to 0.2)                     | 2.3 (1.3 to 5.5)                       |
| Bolivia (Plurinational State of) | Smoking                     | 0.3 (0.1 to 0.5) | 7.4 (3.3 to 13.3)         | 0.2 (0.1 to 0.4)                   | 7.6 (3.3 to 13.6)                      | 0.2 (0.1 to 0.4) | 5 (2.2 to 8.6)            | 0.2 (0.1 to 0.3)                   | 5.2 (2.3 to 8.9)                       |
| Bolivia (Plurinational State of) | Secondhand smoke            | 0.2 (0 to 0.5)   | 8 (1.5 to 14.8)           | 0.2 (0 to 0.4)                     | 8.2 (1.6 to 15.1)                      | 0.2 (0.1 to 0.4) | 7 (1.6 to 13.8)           | 0.3 (0.1 to 0.5)                   | 7.3 (1.6 to 14.2)                      |
| Bolivia (Plurinational State of) | Metabolic risks             | 1.2 (0.3 to 2.5) | 24 (0.6 to 55.8)          | 0.7 (0.1 to 1.5)                   | 24.7 (0.7 to 57.3)                     | 2.3 (0.8 to 4.4) | 43.3 (6.6 to 93.2)        | 1.8 (0.4 to 3.9)                   | 45.1 (7 to 97)                         |
| Bolivia (Plurinational State of) | High body-mass index        | 0.4 (0 to 1.1)   | 5.6 (-7.7 to 21.3)        | 0.2 (-0.1 to 0.6)                  | 5.8 (-7.9 to 21.9)                     | 1 (0.1 to 2.1)   | 14.5 (-8.4 to 40)         | 0.7 (-0.2 to 1.7)                  | 15.1 (-8.7 to 41.7)                    |
| Bolivia (Plurinational State of) | High fasting plasma glucose | 0.8 (0.1 to 1.9) | 19.2 (3.4 to 46)          | 0.5 (0.1 to 1.3)                   | 19.7 (3.5 to 47.3)                     | 1.4 (0.3 to 3.3) | 31.1 (6 to 75.9)          | 1.2 (0.2 to 3.2)                   | 32.3 (6.2 to 78.6)                     |
| Bosnia and Herzegovina           | All risk factors            | 2.7 (1.9 to 3.8) | 73.1 (50.5 to 98)         | 3.4 (2.1 to 5.2)                   | 76.5 (52.4 to 102.7)                   | 6 (3.8 to 9.1)   | 142.5 (92.3 to 214)       | 9.6 (5.5 to 15.7)                  | 152.1 (98.2 to 227.8)                  |
| Bosnia and Herzegovina           | Behavioral risks            | 1.7 (1.3 to 2.1) | 54.3 (41.1 to 67.5)       | 2.4 (1.5 to 3.5)                   | 56.7 (42.6 to 70.4)                    | 3.2 (2.3 to 4.3) | 89.8 (63.4 to 122.1)      | 6.1 (3.7 to 9.4)                   | 95.9 (67.7 to 130.5)                   |
| Bosnia and Herzegovina           | Alcohol use                 | 0.5 (0.3 to 0.6) | 14.7 (9.7 to 20.4)        | 0.6 (0.4 to 1)                     | 15.4 (10.1 to 21.3)                    | 0.8 (0.6 to 1.2) | 24.2 (16.2 to 35.2)       | 1.7 (1 to 2.6)                     | 25.9 (17.3 to 37.5)                    |
| Bosnia and Herzegovina           | Diet high in red meat       | 0.2 (0 to 0.3)   | 6.3 (1.2 to 8.7)          | 0.3 (0.1 to 0.5)                   | 6.6 (1.3 to 9)                         | 0.4 (0.1 to 0.7) | 11.7 (2.4 to 18.5)        | 0.8 (0.2 to 1.4)                   | 12.5 (2.6 to 19.8)                     |
| Bosnia and Herzegovina           | Low physical activity       | 0.1 (0.1 to 0.2) | 2.1 (1.4 to 4.1)          | 0.1 (0.1 to 0.2)                   | 2.2 (1.4 to 4.3)                       | 0.2 (0.1 to 0.3) | 3.4 (2 to 6.1)            | 0.2 (0.1 to 0.4)                   | 3.6 (2.1 to 6.5)                       |

| Location               | Risk factor                 | 1990              |                           |                                    |                                        | 2019              |                           |                                    |                                        |
|------------------------|-----------------------------|-------------------|---------------------------|------------------------------------|----------------------------------------|-------------------|---------------------------|------------------------------------|----------------------------------------|
|                        |                             | Deaths            | YLLs (Years of Life Lost) | YLDs (Years Lived with Disability) | DALYs (Disability-Adjusted Life Years) | Deaths            | YLLs (Years of Life Lost) | YLDs (Years Lived with Disability) | DALYs (Disability-Adjusted Life Years) |
| Bosnia and Herzegovina | Smoking                     | 0.7 (0.5 to 1)    | 23.2 (15.4 to 32)         | 1 (0.6 to 1.6)                     | 24.3 (16.1 to 33.4)                    | 1.4 (1 to 2)      | 41.2 (27 to 59)           | 2.8 (1.6 to 4.5)                   | 43.9 (29 to 63.3)                      |
| Bosnia and Herzegovina | Secondhand smoke            | 0.3 (0.1 to 0.6)  | 10.8 (2.6 to 18.7)        | 0.5 (0.1 to 0.9)                   | 11.3 (2.7 to 19.5)                     | 0.6 (0.1 to 1.1)  | 15.2 (3.8 to 28.4)        | 1 (0.2 to 2)                       | 16.3 (4 to 30.3)                       |
| Bosnia and Herzegovina | Metabolic risks             | 1.1 (0.4 to 2.2)  | 21.5 (2 to 46.2)          | 1.2 (0.2 to 2.5)                   | 22.7 (2.3 to 48.1)                     | 3.3 (1.2 to 6.5)  | 63.2 (18.7 to 133.2)      | 4.2 (1.3 to 8.9)                   | 67.4 (20.1 to 139.9)                   |
| Bosnia and Herzegovina | High body-mass index        | 0.5 (0 to 1)      | 6 (-6.3 to 18.3)          | 0.4 (-0.2 to 1.1)                  | 6.4 (-6.6 to 19.3)                     | 1.3 (0.3 to 2.7)  | 21.1 (-1.1 to 51.2)       | 1.3 (-0.2 to 3.3)                  | 22.4 (-1.2 to 54.4)                    |
| Bosnia and Herzegovina | High fasting plasma glucose | 0.7 (0.1 to 1.6)  | 16.4 (3.1 to 37.8)        | 0.8 (0.1 to 2)                     | 17.2 (3.2 to 39.4)                     | 2.1 (0.4 to 5)    | 45.7 (8.8 to 107.9)       | 3.1 (0.6 to 7.6)                   | 48.8 (9.6 to 115.9)                    |
| Botswana               | All risk factors            | 3.7 (2.2 to 5.8)  | 89.7 (52.1 to 142.2)      | 2.6 (1.4 to 4.2)                   | 92.2 (53.8 to 145.3)                   | 6.9 (3.8 to 11.4) | 154.7 (81.8 to 256.1)     | 6 (3 to 10.3)                      | 160.6 (84.6 to 266.8)                  |
| Botswana               | Behavioral risks            | 2.3 (1.4 to 3.2)  | 62.4 (38.6 to 91.2)       | 1.7 (0.9 to 2.7)                   | 64.1 (39.6 to 93.6)                    | 3.3 (2 to 5.2)    | 90.8 (52 to 146.3)        | 3.4 (1.8 to 5.6)                   | 94.2 (53.8 to 151.4)                   |
| Botswana               | Alcohol use                 | 0.6 (0.4 to 0.9)  | 18.2 (11.5 to 27.9)       | 0.5 (0.3 to 0.8)                   | 18.7 (11.8 to 28.5)                    | 0.9 (0.5 to 1.5)  | 28 (15.3 to 46.9)         | 1 (0.5 to 1.8)                     | 29.1 (15.9 to 48.4)                    |
| Botswana               | Diet high in red meat       | 0.5 (0.2 to 0.9)  | 15.8 (4.5 to 25.9)        | 0.4 (0.1 to 0.7)                   | 16.3 (4.6 to 26.6)                     | 0.8 (0.2 to 1.4)  | 23.2 (6.2 to 40.4)        | 0.9 (0.2 to 1.6)                   | 24 (6.4 to 41.6)                       |
| Botswana               | Low physical activity       | 0.2 (0.1 to 0.3)  | 3.9 (1.9 to 7.5)          | 0.1 (0.1 to 0.2)                   | 4 (2 to 7.8)                           | 0.3 (0.1 to 0.6)  | 6.4 (2.9 to 12.4)         | 0.2 (0.1 to 0.5)                   | 6.6 (3.1 to 12.9)                      |
| Botswana               | Smoking                     | 0.4 (0.2 to 0.7)  | 9.1 (4.4 to 15.2)         | 0.3 (0.1 to 0.5)                   | 9.4 (4.6 to 15.6)                      | 0.5 (0.3 to 0.9)  | 11.7 (6.1 to 19.7)        | 0.5 (0.2 to 0.8)                   | 12.2 (6.3 to 20.5)                     |
| Botswana               | Secondhand smoke            | 0.6 (0.2 to 1.2)  | 18.3 (4.4 to 33.9)        | 0.5 (0.1 to 1)                     | 18.8 (4.5 to 35)                       | 0.9 (0.2 to 1.8)  | 25.8 (5.8 to 51.1)        | 1 (0.2 to 2)                       | 26.8 (6 to 52.8)                       |
| Botswana               | Metabolic risks             | 1.6 (0.5 to 3.4)  | 30.9 (5.3 to 68.7)        | 1 (0.2 to 2.1)                     | 31.9 (5.6 to 70.8)                     | 4 (1.3 to 8.2)    | 72.2 (14.2 to 162.7)      | 2.9 (0.7 to 6.3)                   | 75.1 (14.8 to 169)                     |
| Botswana               | High body-mass index        | 0.6 (0 to 1.3)    | 8.8 (-6 to 26.1)          | 0.3 (-0.1 to 0.8)                  | 9.1 (-6 to 27)                         | 1.6 (0.3 to 3.4)  | 20.7 (-13.9 to 58.9)      | 0.9 (-0.4 to 2.4)                  | 21.6 (-14.3 to 60.9)                   |
| Botswana               | High fasting plasma glucose | 1.1 (0.2 to 2.7)  | 23 (4.2 to 56.8)          | 0.7 (0.1 to 1.8)                   | 23.7 (4.4 to 58.5)                     | 2.6 (0.5 to 6.2)  | 55.9 (10.2 to 132.9)      | 2.2 (0.4 to 5.4)                   | 58.1 (10.6 to 139.3)                   |
| Brazil                 | All risk factors            | 4.8 (3.6 to 6.1)  | 125.5 (94.9 to 158.5)     | 4.6 (3 to 6.4)                     | 130 (98.5 to 164.4)                    | 4.2 (3.1 to 5.5)  | 105.8 (77.8 to 137.5)     | 6.1 (3.9 to 8.8)                   | 111.9 (82.5 to 145.5)                  |
| Brazil                 | Behavioral risks            | 3.4 (2.8 to 4)    | 99.1 (80 to 116.4)        | 3.5 (2.4 to 4.8)                   | 102.6 (82.4 to 121.4)                  | 2.8 (2.3 to 3.4)  | 81.3 (66.2 to 97)         | 4.5 (3.1 to 6.3)                   | 85.8 (69.6 to 102.1)                   |
| Brazil                 | Alcohol use                 | 0.7 (0.5 to 0.8)  | 22.4 (17.1 to 28.1)       | 0.8 (0.5 to 1.1)                   | 23.1 (17.7 to 29.1)                    | 0.7 (0.6 to 0.9)  | 24.8 (19.3 to 30.9)       | 1.3 (0.9 to 1.9)                   | 26.2 (20.3 to 32.5)                    |
| Brazil                 | Diet high in red meat       | 0.7 (0.3 to 0.9)  | 20.5 (8.8 to 27)          | 0.7 (0.3 to 1.1)                   | 21.2 (9.1 to 27.9)                     | 0.8 (0.4 to 1.2)  | 24.3 (12.3 to 34)         | 1.3 (0.7 to 2.1)                   | 25.7 (12.9 to 35.9)                    |
| Brazil                 | Low physical activity       | 0.5 (0.2 to 0.8)  | 12.1 (4 to 21.6)          | 0.4 (0.2 to 0.8)                   | 12.6 (4.2 to 22.4)                     | 0.5 (0.2 to 0.8)  | 11 (3.9 to 18.9)          | 0.6 (0.2 to 1.2)                   | 11.7 (4.1 to 20)                       |
| Brazil                 | Smoking                     | 1.4 (1 to 1.8)    | 39.1 (28.1 to 51.5)       | 1.4 (0.9 to 2.1)                   | 40.6 (29.3 to 53.5)                    | 0.7 (0.5 to 1)    | 20 (13.9 to 26.8)         | 1.2 (0.7 to 1.7)                   | 21.1 (14.6 to 28.3)                    |
| Brazil                 | Secondhand smoke            | 0.5 (0.1 to 0.8)  | 13.3 (3.1 to 22.9)        | 0.5 (0.1 to 0.9)                   | 13.7 (3.2 to 23.8)                     | 0.3 (0.1 to 0.5)  | 7.7 (1.7 to 13.6)         | 0.4 (0.1 to 0.8)                   | 8.2 (1.8 to 14.3)                      |
| Brazil                 | Metabolic risks             | 1.7 (0.6 to 3.3)  | 33 (5.8 to 70.3)          | 1.3 (0.3 to 2.8)                   | 34.3 (6.1 to 73.1)                     | 1.7 (0.6 to 3.2)  | 30.5 (3.6 to 65.2)        | 2 (0.4 to 4.1)                     | 32.4 (4.1 to 69.1)                     |
| Brazil                 | High body-mass index        | 0.6 (0 to 1.2)    | 7 (-6.1 to 21.3)          | 0.4 (-0.1 to 0.9)                  | 7.4 (-6.2 to 22.1)                     | 0.7 (0.1 to 1.5)  | 7.3 (-8.4 to 22.7)        | 0.6 (-0.3 to 1.6)                  | 7.9 (-8.7 to 24.2)                     |
| Brazil                 | High fasting plasma glucose | 1.2 (0.2 to 2.6)  | 27.1 (5.2 to 61.1)        | 1 (0.2 to 2.5)                     | 28.1 (5.4 to 63.5)                     | 1.1 (0.2 to 2.4)  | 24.7 (4.6 to 55.5)        | 1.5 (0.3 to 3.5)                   | 26.2 (4.9 to 59)                       |
| Brunei Darussalam      | All risk factors            | 4.4 (2.6 to 6.9)  | 129.8 (78.6 to 200.5)     | 6.9 (3.7 to 11.5)                  | 136.6 (83.2 to 211.1)                  | 4.9 (2.5 to 8.2)  | 127 (65.9 to 211.9)       | 9.4 (4.6 to 16.8)                  | 136.4 (71 to 227.8)                    |
| Brunei Darussalam      | Behavioral risks            | 2.5 (1.7 to 3.3)  | 82.6 (57.9 to 110.7)      | 4.1 (2.6 to 6.1)                   | 86.7 (60.8 to 116.4)                   | 1.8 (1.1 to 2.4)  | 53.1 (33.6 to 72.8)       | 3.8 (2.2 to 5.7)                   | 56.9 (36.2 to 78.1)                    |
| Brunei Darussalam      | Alcohol use                 | 0.7 (0.5 to 1.1)  | 26.5 (16.7 to 39.8)       | 1.3 (0.7 to 2.1)                   | 27.8 (17.6 to 41.6)                    | 0.2 (0 to 0.4)    | 6.9 (0 to 15.1)           | 0.5 (0 to 1.1)                     | 7.4 (0 to 16.1)                        |
| Brunei Darussalam      | Diet high in red meat       | 0.6 (0.2 to 0.9)  | 22 (7.4 to 32.1)          | 1.1 (0.4 to 1.8)                   | 23.1 (7.8 to 33.7)                     | 0.5 (0.1 to 0.8)  | 16.4 (4 to 25)            | 1.2 (0.3 to 2)                     | 17.6 (4.3 to 26.6)                     |
| Brunei Darussalam      | Low physical activity       | 0.2 (0.1 to 0.4)  | 5.3 (2.1 to 11.2)         | 0.3 (0.1 to 0.7)                   | 5.6 (2.2 to 11.8)                      | 0.3 (0.1 to 0.5)  | 6.7 (2.5 to 14.6)         | 0.5 (0.2 to 1.1)                   | 7.2 (2.7 to 15.7)                      |
| Brunei Darussalam      | Smoking                     | 0.5 (0.4 to 0.8)  | 16.3 (10.3 to 24.3)       | 0.9 (0.5 to 1.4)                   | 17.2 (10.9 to 25.6)                    | 0.4 (0.3 to 0.6)  | 11.3 (7.4 to 16.5)        | 0.8 (0.5 to 1.3)                   | 12.2 (7.9 to 17.7)                     |
| Brunei Darussalam      | Secondhand smoke            | 0.5 (0.1 to 0.9)  | 16.9 (3.5 to 31)          | 0.8 (0.2 to 1.5)                   | 17.7 (3.7 to 32.5)                     | 0.4 (0.1 to 0.7)  | 13.4 (2.8 to 24.5)        | 0.9 (0.2 to 1.8)                   | 14.4 (3.1 to 26.3)                     |
| Brunei Darussalam      | Metabolic risks             | 2.2 (0.5 to 4.6)  | 53.9 (10.1 to 119.7)      | 3.2 (0.7 to 7.2)                   | 57.1 (10.7 to 126.9)                   | 3.4 (1.1 to 6.8)  | 80.2 (22 to 167.6)        | 6.1 (1.6 to 13.1)                  | 86.2 (23.9 to 179.7)                   |
| Brunei Darussalam      | High body-mass index        | 0.2 (-0.1 to 0.6) | 1 (-8.4 to 9.8)           | 0.2 (-0.3 to 0.7)                  | 1.1 (-8.6 to 10.6)                     | 0.6 (0.1 to 1.3)  | 8.7 (-4.9 to 25.7)        | 0.7 (-0.3 to 1.8)                  | 9.3 (-5.1 to 27.4)                     |
| Brunei Darussalam      | High fasting plasma glucose | 2.1 (0.4 to 4.5)  | 53.9 (11.2 to 120.7)      | 3.1 (0.6 to 7.1)                   | 57 (11.9 to 127.2)                     | 3 (0.6 to 6.4)    | 74.1 (15.4 to 161.1)      | 5.6 (1.1 to 12.7)                  | 79.7 (16.6 to 174.5)                   |
| Bulgaria               | All risk factors            | 6.1 (4.7 to 7.5)  | 179.5 (140.7 to 219)      | 11.3 (7.3 to 16.1)                 | 190.8 (150.6 to 234.2)                 | 7.5 (5.3 to 10.5) | 205.8 (146.8 to 287.2)    | 17.1 (10.6 to 26.3)                | 222.8 (157.7 to 311.4)                 |
| Bulgaria               | Behavioral risks            | 4.7 (3.9 to 5.5)  | 155.3 (128.9 to 181.2)    | 9.5 (6.3 to 13.3)                  | 164.8 (136.5 to 193.1)                 | 5.4 (4 to 7.1)    | 163.8 (119.1 to 220)      | 13.3 (8.3 to 20)                   | 177.2 (129.2 to 237.3)                 |
| Bulgaria               | Alcohol use                 | 1.9 (1.5 to 2.3)  | 63.5 (49.8 to 77.8)       | 3.9 (2.5 to 5.6)                   | 67.4 (52.8 to 82.5)                    | 2.3 (1.6 to 3.2)  | 72.3 (50.1 to 100.5)      | 5.9 (3.5 to 9)                     | 78.2 (54.5 to 108.7)                   |
| Bulgaria               | Diet high in red meat       | 1 (0.5 to 1.3)    | 31.2 (15.4 to 42.4)       | 1.9 (0.8 to 3)                     | 33.1 (16.2 to 44.9)                    | 1.2 (0.6 to 1.8)  | 34.6 (16.9 to 52.7)       | 2.8 (1.2 to 4.8)                   | 37.5 (18.1 to 57.1)                    |
| Bulgaria               | Low physical activity       | 0.2 (0.1 to 0.3)  | 4.7 (2.8 to 8.4)          | 0.3 (0.2 to 0.6)                   | 5 (2.9 to 8.9)                         | 0.2 (0.1 to 0.4)  | 5.4 (2.8 to 9.3)          | 0.5 (0.2 to 0.9)                   | 5.9 (3.1 to 10.1)                      |

| Location     | Risk factor                 | 1990             |                           |                                    |                                        | 2019             |                           |                                    |                                        |
|--------------|-----------------------------|------------------|---------------------------|------------------------------------|----------------------------------------|------------------|---------------------------|------------------------------------|----------------------------------------|
|              |                             | Deaths           | YLLs (Years of Life Lost) | YLDs (Years Lived with Disability) | DALYs (Disability-Adjusted Life Years) | Deaths           | YLLs (Years of Life Lost) | YLDs (Years Lived with Disability) | DALYs (Disability-Adjusted Life Years) |
| Bulgaria     | Smoking                     | 1.6 (1.1 to 2.2) | 55 (36.8 to 75)           | 3.3 (1.9 to 5.2)                   | 58.3 (38.8 to 79.1)                    | 1.6 (1.1 to 2.3) | 52.3 (33.9 to 76.7)       | 4.2 (2.3 to 6.8)                   | 56.5 (36.5 to 82.6)                    |
| Bulgaria     | Secondhand smoke            | 0.6 (0.1 to 1)   | 17.8 (4.3 to 31)          | 1.1 (0.3 to 2)                     | 18.9 (4.6 to 33.2)                     | 0.6 (0.1 to 1.1) | 17.1 (4.3 to 31.3)        | 1.4 (0.3 to 2.7)                   | 18.5 (4.5 to 34)                       |
| Bulgaria     | Metabolic risks             | 1.7 (0.5 to 3.3) | 31.5 (-1 to 70.5)         | 2.3 (0.2 to 5)                     | 33.8 (-0.7 to 74.8)                    | 2.7 (1 to 5.2)   | 55 (13.5 to 114)          | 4.9 (1.3 to 10.3)                  | 59.9 (14.7 to 123.2)                   |
| Bulgaria     | High body-mass index        | 0.8 (0 to 1.8)   | 9.9 (-13.6 to 32.4)       | 0.8 (-0.6 to 2.4)                  | 10.7 (-14.2 to 34.7)                   | 1.3 (0.3 to 2.7) | 20.9 (-5.4 to 51.7)       | 1.9 (-0.3 to 4.6)                  | 22.8 (-5.6 to 55.8)                    |
| Bulgaria     | High fasting plasma glucose | 0.9 (0.2 to 2.2) | 23.1 (4.2 to 54)          | 1.5 (0.3 to 3.8)                   | 24.6 (4.5 to 57.3)                     | 1.6 (0.3 to 3.8) | 36.7 (6.9 to 88.2)        | 3.2 (0.6 to 8.1)                   | 39.9 (7.6 to 96.2)                     |
| Burkina Faso | All risk factors            | 3.5 (2.3 to 5.1) | 90.4 (59 to 126.2)        | 2.1 (1.3 to 3.3)                   | 92.5 (60.3 to 129.5)                   | 4.9 (3.4 to 6.9) | 120.9 (81.3 to 168.7)     | 3.4 (2 to 5.3)                     | 124.3 (84 to 173.3)                    |
| Burkina Faso | Behavioral risks            | 2.6 (1.8 to 3.5) | 73 (51 to 99.1)           | 1.7 (1 to 2.5)                     | 74.6 (52.1 to 101)                     | 3.3 (2.3 to 4.4) | 91.5 (63.9 to 124.4)      | 2.5 (1.5 to 3.7)                   | 94 (65.5 to 127.8)                     |
| Burkina Faso | Alcohol use                 | 1.8 (1.3 to 2.5) | 52.3 (36 to 71.6)         | 1.2 (0.7 to 1.8)                   | 53.5 (36.8 to 73.2)                    | 2.4 (1.6 to 3.3) | 67.6 (44.6 to 94.4)       | 1.8 (1.1 to 2.9)                   | 69.4 (45.8 to 96.9)                    |
| Burkina Faso | Diet high in red meat       | 0.3 (0.1 to 0.4) | 8.3 (1.5 to 12.9)         | 0.2 (0 to 0.3)                     | 8.4 (1.6 to 13.2)                      | 0.4 (0.1 to 0.6) | 11.6 (2.3 to 18.2)        | 0.3 (0.1 to 0.5)                   | 11.9 (2.4 to 18.7)                     |
| Burkina Faso | Low physical activity       | 0.1 (0.1 to 0.2) | 2.7 (1.6 to 5.4)          | 0.1 (0 to 0.1)                     | 2.8 (1.6 to 5.5)                       | 0.2 (0.1 to 0.3) | 3.3 (1.9 to 6.3)          | 0.1 (0 to 0.2)                     | 3.4 (1.9 to 6.5)                       |
| Burkina Faso | Smoking                     | 0 (0 to 0.1)     | 1.1 (0.4 to 1.8)          | 0 (0 to 0)                         | 1.1 (0.4 to 1.9)                       | 0 (0 to 0.1)     | 1.1 (0.5 to 2)            | 0 (0 to 0.1)                       | 1.1 (0.5 to 2)                         |
| Burkina Faso | Secondhand smoke            | 0.4 (0.1 to 0.7) | 11.4 (2.7 to 21.2)        | 0.3 (0.1 to 0.5)                   | 11.7 (2.7 to 21.7)                     | 0.4 (0.1 to 0.7) | 11.8 (2.7 to 21.2)        | 0.3 (0.1 to 0.6)                   | 12.1 (2.7 to 21.9)                     |
| Burkina Faso | Metabolic risks             | 1.1 (0.3 to 2.3) | 20.3 (4.4 to 45.2)        | 0.6 (0.1 to 1.3)                   | 20.9 (4.5 to 46.3)                     | 1.9 (0.6 to 3.8) | 35 (5.6 to 77.3)          | 1.1 (0.3 to 2.4)                   | 36 (5.9 to 79.6)                       |
| Burkina Faso | High body-mass index        | 0.2 (0 to 0.6)   | 3.2 (-2.1 to 10.2)        | 0.1 (0 to 0.3)                     | 3.3 (-2.2 to 10.5)                     | 0.7 (0.1 to 1.6) | 8.9 (-6.3 to 27.6)        | 0.3 (-0.1 to 0.8)                  | 9.2 (-6.3 to 28.6)                     |
| Burkina Faso | High fasting plasma glucose | 0.9 (0.2 to 2)   | 17.4 (3.1 to 41.4)        | 0.5 (0.1 to 1.2)                   | 17.9 (3.2 to 42.6)                     | 1.3 (0.2 to 3)   | 27.3 (5.1 to 63.5)        | 0.8 (0.1 to 2)                     | 28.1 (5.2 to 65.2)                     |
| Burundi      | All risk factors            | 2.3 (1.4 to 3.6) | 64.5 (39.7 to 99.5)       | 1.4 (0.8 to 2.3)                   | 65.9 (40.5 to 101.6)                   | 1.9 (1 to 3.4)   | 48.6 (26.7 to 85.2)       | 1.3 (0.7 to 2.4)                   | 49.9 (27.3 to 87.6)                    |
| Burundi      | Behavioral risks            | 1.6 (1.1 to 2.3) | 50.8 (32.3 to 74)         | 1.1 (0.6 to 1.7)                   | 51.8 (32.9 to 75.5)                    | 1 (0.7 to 1.6)   | 31.2 (19.6 to 48.3)       | 0.8 (0.4 to 1.3)                   | 32 (20.2 to 49.4)                      |
| Burundi      | Alcohol use                 | 1.1 (0.7 to 1.6) | 34.5 (21.4 to 51.1)       | 0.7 (0.4 to 1.1)                   | 35.2 (21.8 to 52.1)                    | 0.6 (0.3 to 0.9) | 17.8 (10.8 to 28.7)       | 0.4 (0.2 to 0.7)                   | 18.3 (11 to 29.4)                      |
| Burundi      | Diet high in red meat       | 0.1 (0 to 0.2)   | 3.4 (1.1 to 5.6)          | 0.1 (0 to 0.1)                     | 3.5 (1.2 to 5.7)                       | 0.1 (0 to 0.2)   | 2.6 (1 to 4.4)            | 0.1 (0 to 0.1)                     | 2.7 (1 to 4.5)                         |
| Burundi      | Low physical activity       | 0.1 (0 to 0.2)   | 2 (1.2 to 5.1)            | 0 (0 to 0.1)                       | 2.1 (1.2 to 5.1)                       | 0.1 (0 to 0.2)   | 1.8 (1 to 4.3)            | 0 (0 to 0.1)                       | 1.9 (1.1 to 4.4)                       |
| Burundi      | Smoking                     | 0.2 (0.1 to 0.3) | 4.4 (1.8 to 8.1)          | 0.1 (0 to 0.2)                     | 4.5 (1.8 to 8.2)                       | 0.1 (0.1 to 0.2) | 3.3 (1.3 to 6.1)          | 0.1 (0 to 0.2)                     | 3.4 (1.3 to 6.2)                       |
| Burundi      | Secondhand smoke            | 0.2 (0 to 0.4)   | 7.8 (1.5 to 14.7)         | 0.2 (0 to 0.3)                     | 7.9 (1.5 to 15)                        | 0.2 (0 to 0.4)   | 6.3 (1.5 to 12.6)         | 0.2 (0 to 0.3)                     | 6.4 (1.5 to 12.9)                      |
| Burundi      | Metabolic risks             | 0.7 (0.2 to 1.7) | 15.2 (1.3 to 38.4)        | 0.4 (0.1 to 1)                     | 15.6 (1.3 to 39.5)                     | 0.9 (0.2 to 2.1) | 18.6 (2.8 to 45.4)        | 0.5 (0.1 to 1.3)                   | 19.1 (2.9 to 46.7)                     |
| Burundi      | High body-mass index        | 0.1 (0 to 0.4)   | 1.2 (-4 to 7.7)           | 0.1 (0 to 0.2)                     | 1.2 (-4.1 to 7.9)                      | 0.2 (0 to 0.6)   | 2.7 (-3.1 to 10.3)        | 0.1 (0 to 0.3)                     | 2.8 (-3.1 to 10.7)                     |
| Burundi      | High fasting plasma glucose | 0.6 (0.1 to 1.5) | 14.1 (2.3 to 36.4)        | 0.3 (0.1 to 0.9)                   | 14.5 (2.4 to 37.3)                     | 0.7 (0.1 to 1.8) | 16.1 (2.7 to 42.5)        | 0.4 (0.1 to 1.2)                   | 16.6 (2.8 to 43.5)                     |
| Cabo Verde   | All risk factors            | 2.2 (1.5 to 3.1) | 55.8 (37.2 to 77.9)       | 1.7 (1 to 2.6)                     | 57.5 (38.3 to 80.1)                    | 3.4 (2 to 5.4)   | 73 (44.3 to 114.5)        | 3.2 (1.8 to 5.4)                   | 76.2 (46.4 to 119.5)                   |
| Cabo Verde   | Behavioral risks            | 1.4 (1.1 to 1.9) | 43.5 (32.3 to 56.4)       | 1.2 (0.8 to 1.8)                   | 44.7 (33.1 to 58.2)                    | 1.6 (1.2 to 2.2) | 43.7 (30.9 to 58.3)       | 1.9 (1.2 to 2.8)                   | 45.6 (32.5 to 60.4)                    |
| Cabo Verde   | Alcohol use                 | 0.8 (0.6 to 1)   | 24.2 (17.3 to 32.6)       | 0.7 (0.4 to 1)                     | 24.9 (17.8 to 33.6)                    | 0.9 (0.6 to 1.3) | 25.4 (17.8 to 35.4)       | 1.1 (0.7 to 1.7)                   | 26.5 (18.6 to 37)                      |
| Cabo Verde   | Diet high in red meat       | 0.2 (0 to 0.3)   | 7 (1.3 to 10.4)           | 0.2 (0 to 0.3)                     | 7.2 (1.4 to 10.7)                      | 0.3 (0.1 to 0.4) | 7.1 (1.4 to 10.9)         | 0.3 (0.1 to 0.5)                   | 7.4 (1.5 to 11.4)                      |
| Cabo Verde   | Low physical activity       | 0.1 (0.1 to 0.2) | 2.6 (1.5 to 4.7)          | 0.1 (0 to 0.2)                     | 2.7 (1.5 to 4.8)                       | 0.2 (0.1 to 0.3) | 3.1 (1.6 to 5.5)          | 0.1 (0.1 to 0.3)                   | 3.2 (1.7 to 5.7)                       |
| Cabo Verde   | Smoking                     | 0.1 (0.1 to 0.2) | 3.5 (1.6 to 5.9)          | 0.1 (0 to 0.2)                     | 3.6 (1.7 to 6)                         | 0.1 (0.1 to 0.2) | 2.9 (1.4 to 4.7)          | 0.1 (0.1 to 0.2)                   | 3 (1.5 to 4.9)                         |
| Cabo Verde   | Secondhand smoke            | 0.2 (0.1 to 0.4) | 7.7 (1.8 to 13.9)         | 0.2 (0 to 0.4)                     | 7.9 (1.8 to 14.4)                      | 0.2 (0.1 to 0.4) | 6.9 (1.5 to 12.2)         | 0.3 (0.1 to 0.6)                   | 7.2 (1.6 to 12.8)                      |
| Cabo Verde   | Metabolic risks             | 0.8 (0.2 to 1.7) | 13.8 (-0.6 to 33.2)       | 0.5 (0.1 to 1.1)                   | 14.3 (-0.4 to 34.1)                    | 1.9 (0.6 to 3.9) | 32.9 (5.6 to 71.8)        | 1.5 (0.3 to 3.3)                   | 34.4 (5.9 to 74.8)                     |
| Cabo Verde   | High body-mass index        | 0.2 (0 to 0.6)   | 1.5 (-7.2 to 9.2)         | 0.1 (-0.1 to 0.4)                  | 1.6 (-7.4 to 9.4)                      | 0.6 (0.1 to 1.4) | 7.6 (-5.2 to 23.3)        | 0.4 (-0.2 to 1.1)                  | 8 (-5.4 to 24.4)                       |
| Cabo Verde   | High fasting plasma glucose | 0.6 (0.1 to 1.4) | 12.7 (2.4 to 29.1)        | 0.4 (0.1 to 1)                     | 13.2 (2.4 to 30.2)                     | 1.4 (0.3 to 3.2) | 26.8 (5.2 to 62.5)        | 1.2 (0.2 to 2.9)                   | 28 (5.4 to 65.4)                       |
| Cambodia     | All risk factors            | 1.5 (0.9 to 2.5) | 47.1 (26.6 to 74.9)       | 1.2 (0.6 to 2)                     | 48.2 (27.3 to 76.6)                    | 3.4 (2.1 to 5.1) | 96.6 (58.7 to 142.1)      | 3.3 (1.8 to 5.2)                   | 99.9 (61.2 to 146.6)                   |
| Cambodia     | Behavioral risks            | 0.9 (0.5 to 1.4) | 29.7 (16.8 to 45.4)       | 0.7 (0.4 to 1.1)                   | 30.4 (17.2 to 46.5)                    | 1.6 (1.1 to 2.2) | 52.3 (34.2 to 73)         | 1.7 (1 to 2.7)                     | 54.1 (35.4 to 75.4)                    |
| Cambodia     | Alcohol use                 | 0.1 (0 to 0.2)   | 3.8 (1.6 to 6.7)          | 0.1 (0 to 0.2)                     | 3.9 (1.7 to 6.9)                       | 0.7 (0.4 to 0.9) | 23.2 (14.8 to 33.7)       | 0.8 (0.4 to 1.2)                   | 24 (15.2 to 34.9)                      |
| Cambodia     | Diet high in red meat       | 0.2 (0 to 0.3)   | 6.1 (1.1 to 9.8)          | 0.1 (0 to 0.2)                     | 6.2 (1.1 to 10)                        | 0.3 (0.1 to 0.4) | 8.1 (1.6 to 12.8)         | 0.3 (0.1 to 0.5)                   | 8.4 (1.7 to 13.3)                      |
| Cambodia     | Low physical activity       | 0.1 (0 to 0.1)   | 1.6 (0.9 to 3.9)          | 0 (0 to 0.1)                       | 1.6 (0.9 to 4)                         | 0.1 (0 to 0.2)   | 2 (1.2 to 4.3)            | 0.1 (0 to 0.1)                     | 2.1 (1.2 to 4.5)                       |
| Cambodia     | Smoking                     | 0.2 (0.1 to 0.3) | 4.4 (2.2 to 7)            | 0.1 (0.1 to 0.2)                   | 4.5 (2.3 to 7.2)                       | 0.2 (0.1 to 0.3) | 4.7 (2.5 to 7.5)          | 0.2 (0.1 to 0.3)                   | 4.9 (2.6 to 7.7)                       |

| Location                 | Risk factor                 | 1990             |                           |                                    |                                        | 2019             |                           |                                    |                                        |
|--------------------------|-----------------------------|------------------|---------------------------|------------------------------------|----------------------------------------|------------------|---------------------------|------------------------------------|----------------------------------------|
|                          |                             | Deaths           | YLLs (Years of Life Lost) | YLDs (Years Lived with Disability) | DALYs (Disability-Adjusted Life Years) | Deaths           | YLLs (Years of Life Lost) | YLDs (Years Lived with Disability) | DALYs (Disability-Adjusted Life Years) |
| Cambodia                 | Secondhand smoke            | 0.4 (0.1 to 0.8) | 14.7 (3.4 to 26.9)        | 0.3 (0.1 to 0.7)                   | 15 (3.5 to 27.5)                       | 0.5 (0.1 to 0.9) | 16.6 (3.8 to 30.1)        | 0.6 (0.1 to 1.1)                   | 17.2 (4 to 31.1)                       |
| Cambodia                 | Metabolic risks             | 0.7 (0.2 to 1.5) | 18.9 (5.5 to 40)          | 0.5 (0.1 to 1.1)                   | 19.4 (5.6 to 40.9)                     | 2 (0.8 to 3.6)   | 50.1 (18.9 to 91.4)       | 1.7 (0.6 to 3.2)                   | 51.8 (19.6 to 94.4)                    |
| Cambodia                 | High body-mass index        | 0.4 (0.1 to 1)   | 10.7 (2 to 28.1)          | 0.3 (0 to 0.7)                     | 11 (2.1 to 28.9)                       | 1.1 (0.3 to 2.3) | 28.6 (7.6 to 60.4)        | 1 (0.2 to 2.2)                     | 29.6 (7.8 to 62.2)                     |
| Cambodia                 | High fasting plasma glucose | 0.3 (0.1 to 0.8) | 8.6 (1.4 to 20.6)         | 0.2 (0 to 0.6)                     | 8.8 (1.4 to 21.1)                      | 1 (0.2 to 2.2)   | 23.7 (4.3 to 55.2)        | 0.8 (0.2 to 2.1)                   | 24.5 (4.4 to 57.2)                     |
| Cameroon                 | All risk factors            | 3.1 (2 to 4.4)   | 77.1 (48.6 to 111.2)      | 1.9 (1.1 to 3)                     | 79 (50 to 113.9)                       | 4.5 (2.6 to 7.2) | 105.9 (60.3 to 169.8)     | 3.2 (1.7 to 5.4)                   | 109.1 (61.8 to 174.9)                  |
| Cameroon                 | Behavioral risks            | 1.9 (1.4 to 2.6) | 57.5 (39.9 to 77.4)       | 1.3 (0.8 to 1.9)                   | 58.8 (41.1 to 79.3)                    | 2.4 (1.6 to 3.5) | 69.9 (44.5 to 105)        | 2 (1.1 to 3.1)                     | 71.9 (45.6 to 107.2)                   |
| Cameroon                 | Alcohol use                 | 1.2 (0.8 to 1.6) | 35.6 (24.3 to 48.8)       | 0.8 (0.5 to 1.2)                   | 36.4 (24.9 to 50)                      | 1.5 (0.9 to 2.3) | 45.4 (27.5 to 69.2)       | 1.3 (0.7 to 2.1)                   | 46.7 (28.2 to 71.5)                    |
| Cameroon                 | Diet high in red meat       | 0.3 (0.1 to 0.5) | 9.6 (1.8 to 14.8)         | 0.2 (0 to 0.4)                     | 9.8 (1.8 to 15.1)                      | 0.4 (0.1 to 0.6) | 10.1 (1.9 to 18.1)        | 0.3 (0 to 0.5)                     | 10.4 (1.9 to 18.7)                     |
| Cameroon                 | Low physical activity       | 0.2 (0.1 to 0.3) | 3.6 (1.9 to 6.6)          | 0.1 (0 to 0.2)                     | 3.7 (2 to 6.7)                         | 0.2 (0.1 to 0.4) | 4.9 (2.3 to 9.5)          | 0.2 (0.1 to 0.3)                   | 5.1 (2.4 to 9.7)                       |
| Cameroon                 | Smoking                     | 0.1 (0 to 0.1)   | 1.5 (0.7 to 2.6)          | 0 (0 to 0.1)                       | 1.5 (0.7 to 2.6)                       | 0.1 (0 to 0.1)   | 1.5 (0.7 to 2.8)          | 0 (0 to 0.1)                       | 1.6 (0.7 to 2.9)                       |
| Cameroon                 | Secondhand smoke            | 0.3 (0.1 to 0.5) | 9.3 (2 to 17.1)           | 0.2 (0 to 0.4)                     | 9.6 (2 to 17.4)                        | 0.3 (0.1 to 0.6) | 10.2 (2.2 to 19.7)        | 0.3 (0.1 to 0.6)                   | 10.5 (2.3 to 20.3)                     |
| Cameroon                 | Metabolic risks             | 1.3 (0.4 to 2.5) | 21.9 (0.7 to 50.5)        | 0.7 (0.1 to 1.4)                   | 22.6 (0.8 to 51.8)                     | 2.3 (0.8 to 4.6) | 40.3 (4.5 to 89.5)        | 1.4 (0.3 to 2.9)                   | 41.6 (4.8 to 92.3)                     |
| Cameroon                 | High body-mass index        | 0.7 (0 to 1.5)   | 9.2 (-7.3 to 30.1)        | 0.3 (-0.1 to 0.8)                  | 9.5 (-7.3 to 30.9)                     | 1.1 (0.1 to 2.4) | 13.4 (-11 to 41.1)        | 0.5 (-0.2 to 1.4)                  | 13.9 (-11.2 to 42.7)                   |
| Cameroon                 | High fasting plasma glucose | 0.6 (0.1 to 1.4) | 13.5 (2.5 to 32.1)        | 0.4 (0.1 to 0.9)                   | 13.8 (2.5 to 32.8)                     | 1.3 (0.3 to 3.3) | 28.9 (5.6 to 70.5)        | 0.9 (0.2 to 2.3)                   | 29.8 (5.7 to 72.4)                     |
| Canada                   | All risk factors            | 8.4 (6.9 to 9.9) | 220.1 (184.3 to 255.7)    | 22.9 (15.5 to 32.6)                | 243.1 (203.1 to 283.4)                 | 5.8 (4.5 to 7.3) | 135.8 (107.3 to 166.8)    | 21.1 (13.2 to 31.9)                | 156.9 (123.4 to 193.8)                 |
| Canada                   | Behavioral risks            | 6.9 (5.9 to 7.8) | 193.1 (166.4 to 219)      | 19.7 (13.3 to 27.7)                | 212.8 (181.9 to 241.6)                 | 4.1 (3.4 to 4.8) | 107.6 (90.2 to 124.6)     | 16.2 (10.3 to 23.8)                | 123.8 (104 to 144.8)                   |
| Canada                   | Alcohol use                 | 3.1 (2.5 to 3.8) | 90.3 (73 to 108.9)        | 9.1 (6 to 13.3)                    | 99.4 (79.7 to 119.7)                   | 2.1 (1.6 to 2.5) | 57.3 (45.8 to 69.6)       | 8.5 (5.3 to 12.8)                  | 65.8 (52 to 80.7)                      |
| Canada                   | Diet high in red meat       | 1.3 (0.7 to 1.8) | 37.5 (19 to 50.1)         | 3.8 (1.7 to 6.1)                   | 41.3 (21.1 to 55.7)                    | 0.8 (0.4 to 1.2) | 21.7 (10.6 to 29.8)       | 3.3 (1.4 to 5.4)                   | 25 (11.9 to 34.7)                      |
| Canada                   | Low physical activity       | 0.3 (0.1 to 0.7) | 7.6 (2.9 to 15.5)         | 0.8 (0.3 to 1.9)                   | 8.4 (3.2 to 17.3)                      | 0.3 (0.1 to 0.5) | 5.7 (2 to 11.2)           | 0.9 (0.3 to 2)                     | 6.6 (2.3 to 13.1)                      |
| Canada                   | Smoking                     | 2.4 (1.7 to 3.2) | 67.8 (50.1 to 86.8)       | 7 (4.2 to 10.4)                    | 74.8 (54.6 to 96)                      | 1.1 (0.8 to 1.4) | 27.5 (19.8 to 36)         | 4.2 (2.4 to 6.7)                   | 31.8 (22.4 to 41.8)                    |
| Canada                   | Secondhand smoke            | 0.4 (0.1 to 0.7) | 11.8 (2.7 to 20.9)        | 1.2 (0.3 to 2.2)                   | 12.9 (2.9 to 22.9)                     | 0.2 (0 to 0.3)   | 5.4 (1.2 to 9.6)          | 0.8 (0.2 to 1.5)                   | 6.2 (1.4 to 11.1)                      |
| Canada                   | Metabolic risks             | 2.1 (0.8 to 3.8) | 36.5 (5.8 to 74.2)        | 4.4 (1.1 to 8.8)                   | 40.9 (6.9 to 81.3)                     | 2.1 (0.8 to 3.8) | 37 (9.4 to 71.6)          | 6.3 (1.8 to 12.5)                  | 43.3 (11 to 83.3)                      |
| Canada                   | High body-mass index        | 1.2 (0.2 to 2.5) | 18.8 (-4.2 to 46.7)       | 2.3 (-0.1 to 5.4)                  | 21.1 (-4.4 to 51.5)                    | 1.2 (0.3 to 2.3) | 17.2 (-2 to 39.5)         | 3.1 (0.1 to 6.8)                   | 20.3 (-1.7 to 45.9)                    |
| Canada                   | High fasting plasma glucose | 0.9 (0.2 to 2.1) | 18.9 (3.4 to 43.4)        | 2.1 (0.4 to 5.3)                   | 21.1 (3.8 to 48)                       | 1.1 (0.2 to 2.4) | 21.4 (4 to 49.1)          | 3.5 (0.6 to 8.8)                   | 24.9 (4.6 to 57.4)                     |
| Central African Republic | All risk factors            | 3.2 (2 to 4.9)   | 89.9 (57.5 to 134.6)      | 1.9 (1.1 to 3.1)                   | 91.8 (59.2 to 137.5)                   | 3.6 (1.9 to 6.5) | 96.9 (50.9 to 172.7)      | 2.1 (1.1 to 3.9)                   | 99 (52.3 to 176.5)                     |
| Central African Republic | Behavioral risks            | 2.3 (1.6 to 3.2) | 70.2 (48.8 to 98)         | 1.4 (0.9 to 2.2)                   | 71.6 (49.8 to 99.7)                    | 2.3 (1.3 to 3.8) | 66.7 (37.6 to 114.3)      | 1.4 (0.7 to 2.5)                   | 68.1 (38.5 to 116.4)                   |
| Central African Republic | Alcohol use                 | 1.2 (0.8 to 1.7) | 37.9 (24.6 to 54.1)       | 0.8 (0.4 to 1.2)                   | 38.6 (25.1 to 55.3)                    | 1 (0.5 to 1.7)   | 30.3 (15.6 to 54.1)       | 0.6 (0.3 to 1.1)                   | 30.9 (15.9 to 54.9)                    |
| Central African Republic | Diet high in red meat       | 0.6 (0.2 to 0.9) | 17.8 (5.8 to 27.2)        | 0.4 (0.1 to 0.6)                   | 18.2 (5.9 to 27.7)                     | 0.7 (0.3 to 1.4) | 22.2 (8 to 41.8)          | 0.5 (0.2 to 0.9)                   | 22.6 (8.1 to 42.6)                     |
| Central African Republic | Low physical activity       | 0.2 (0.1 to 0.4) | 5.3 (2.5 to 10.2)         | 0.1 (0.1 to 0.2)                   | 5.4 (2.5 to 10.5)                      | 0.2 (0.1 to 0.5) | 5.6 (2.3 to 11.3)         | 0.1 (0.1 to 0.3)                   | 5.7 (2.4 to 11.5)                      |
| Central African Republic | Smoking                     | 0.1 (0.1 to 0.2) | 3.1 (1.5 to 5.2)          | 0.1 (0 to 0.1)                     | 3.2 (1.5 to 5.3)                       | 0.1 (0.1 to 0.2) | 2.6 (1.2 to 5.1)          | 0.1 (0 to 0.1)                     | 2.7 (1.3 to 5.2)                       |
| Central African Republic | Secondhand smoke            | 0.3 (0.1 to 0.5) | 9.1 (1.9 to 17.7)         | 0.2 (0 to 0.4)                     | 9.3 (1.9 to 18.1)                      | 0.3 (0.1 to 0.6) | 8.8 (1.7 to 19.4)         | 0.2 (0 to 0.4)                     | 9 (1.8 to 19.8)                        |
| Central African Republic | Metabolic risks             | 1 (0.2 to 2.3)   | 22.4 (3.5 to 53.5)        | 0.5 (0.1 to 1.3)                   | 23 (3.6 to 54.7)                       | 1.5 (0.4 to 3.7) | 34 (6.3 to 88.8)          | 0.8 (0.2 to 2.1)                   | 34.8 (6.5 to 90.8)                     |
| Central African Republic | High body-mass index        | 0.2 (0 to 0.5)   | 2.1 (-2.9 to 8.6)         | 0.1 (0 to 0.2)                     | 2.1 (-3 to 8.9)                        | 0.3 (0 to 0.7)   | 3.5 (-3.9 to 12.5)        | 0.1 (0 to 0.4)                     | 3.6 (-3.9 to 12.8)                     |
| Central African Republic | High fasting plasma glucose | 0.9 (0.2 to 2.1) | 20.6 (3.7 to 52.4)        | 0.5 (0.1 to 1.2)                   | 21.1 (3.7 to 53.7)                     | 1.3 (0.2 to 3.5) | 30.9 (5.8 to 85.1)        | 0.7 (0.1 to 1.9)                   | 31.7 (6 to 86.8)                       |
| Chad                     | All risk factors            | 1.5 (0.8 to 2.3) | 39.9 (22.7 to 63.6)       | 0.9 (0.5 to 1.6)                   | 40.8 (23.2 to 64.8)                    | 2.5 (1.4 to 4)   | 63.8 (35.6 to 102.1)      | 1.6 (0.8 to 2.8)                   | 65.4 (36.6 to 104.5)                   |
| Chad                     | Behavioral risks            | 1 (0.6 to 1.5)   | 29.7 (17 to 45.3)         | 0.7 (0.4 to 1.1)                   | 30.4 (17.4 to 46.3)                    | 1.4 (0.8 to 2.1) | 41.6 (24.2 to 63.5)       | 1 (0.5 to 1.7)                     | 42.7 (24.8 to 64.9)                    |
| Chad                     | Alcohol use                 | 0.4 (0.2 to 0.7) | 13.2 (5.4 to 23.7)        | 0.3 (0.1 to 0.5)                   | 13.5 (5.4 to 24.1)                     | 0.7 (0.3 to 1.2) | 22.2 (10.5 to 36.4)       | 0.5 (0.2 to 1)                     | 22.8 (10.7 to 37.2)                    |
| Chad                     | Diet high in red meat       | 0.2 (0.1 to 0.4) | 7.2 (1.5 to 11.6)         | 0.2 (0 to 0.3)                     | 7.4 (1.6 to 11.8)                      | 0.3 (0.1 to 0.5) | 8.2 (1.6 to 13.8)         | 0.2 (0 to 0.4)                     | 8.4 (1.7 to 14.1)                      |
| Chad                     | Low physical activity       | 0.1 (0 to 0.1)   | 1.9 (1 to 3.6)            | 0 (0 to 0.1)                       | 1.9 (1 to 3.7)                         | 0.1 (0.1 to 0.2) | 2.5 (1.3 to 4.8)          | 0.1 (0 to 0.1)                     | 2.6 (1.3 to 4.9)                       |
| Chad                     | Smoking                     | 0.1 (0 to 0.1)   | 1.7 (0.7 to 3.1)          | 0 (0 to 0.1)                       | 1.7 (0.7 to 3.2)                       | 0.1 (0 to 0.1)   | 1.9 (0.9 to 3.4)          | 0.1 (0 to 0.1)                     | 2 (0.9 to 3.5)                         |

| Location | Risk factor                 | 1990             |                           |                                    |                                        | 2019             |                           |                                    |                                        |
|----------|-----------------------------|------------------|---------------------------|------------------------------------|----------------------------------------|------------------|---------------------------|------------------------------------|----------------------------------------|
|          |                             | Deaths           | YLLs (Years of Life Lost) | YLDs (Years Lived with Disability) | DALYs (Disability-Adjusted Life Years) | Deaths           | YLLs (Years of Life Lost) | YLDs (Years Lived with Disability) | DALYs (Disability-Adjusted Life Years) |
| Chad     | Secondhand smoke            | 0.2 (0.1 to 0.4) | 6.8 (1.6 to 12.8)         | 0.1 (0 to 0.3)                     | 6.9 (1.7 to 13)                        | 0.3 (0.1 to 0.5) | 8.3 (2.1 to 15.7)         | 0.2 (0 to 0.4)                     | 8.5 (2.1 to 16.1)                      |
| Chad     | Metabolic risks             | 0.5 (0.1 to 1.2) | 11.1 (2.4 to 26.1)        | 0.3 (0.1 to 0.7)                   | 11.4 (2.4 to 26.7)                     | 1.2 (0.3 to 2.5) | 24.5 (5.6 to 55)          | 0.7 (0.2 to 1.6)                   | 25.2 (5.8 to 56.5)                     |
| Chad     | High body-mass index        | 0.1 (0 to 0.3)   | 1.6 (-0.8 to 5.7)         | 0.1 (0 to 0.2)                     | 1.7 (-0.8 to 5.9)                      | 0.3 (0 to 0.7)   | 4.9 (-1.6 to 14)          | 0.2 (0 to 0.4)                     | 5.1 (-1.6 to 14.4)                     |
| Chad     | High fasting plasma glucose | 0.4 (0.1 to 1.1) | 9.6 (1.6 to 24.1)         | 0.3 (0 to 0.7)                     | 9.8 (1.6 to 24.8)                      | 0.9 (0.2 to 2.1) | 20.1 (3.4 to 48.5)        | 0.5 (0.1 to 1.4)                   | 20.7 (3.5 to 49.8)                     |
| Chile    | All risk factors            | 5.6 (4.4 to 6.9) | 142.6 (112.9 to 173.6)    | 6.6 (4.4 to 9.4)                   | 149.2 (118.3 to 181.8)                 | 4.9 (3.6 to 6.4) | 114.2 (85.4 to 146.3)     | 9.3 (5.8 to 14.1)                  | 123.5 (92.7 to 157.8)                  |
| Chile    | Behavioral risks            | 4.3 (3.5 to 5)   | 120.4 (99.6 to 141.3)     | 5.4 (3.6 to 7.7)                   | 125.8 (104.1 to 148)                   | 3.3 (2.7 to 4)   | 88.7 (73 to 106.8)        | 7.1 (4.4 to 10.7)                  | 95.9 (77.9 to 114.9)                   |
| Chile    | Alcohol use                 | 2 (1.6 to 2.4)   | 57.8 (47.1 to 69.9)       | 2.6 (1.7 to 3.7)                   | 60.4 (49 to 73)                        | 1.5 (1.2 to 1.9) | 42.4 (33 to 52.8)         | 3.4 (2.1 to 5.2)                   | 45.8 (35.5 to 57.2)                    |
| Chile    | Diet high in red meat       | 0.6 (0.2 to 0.8) | 17.2 (6.4 to 22.8)        | 0.8 (0.3 to 1.2)                   | 17.9 (6.6 to 23.8)                     | 0.7 (0.3 to 0.9) | 17.7 (8.5 to 24.5)        | 1.4 (0.6 to 2.4)                   | 19.1 (9.2 to 26.5)                     |
| Chile    | Low physical activity       | 0.2 (0.1 to 0.4) | 4.2 (1.7 to 8.7)          | 0.2 (0.1 to 0.5)                   | 4.4 (1.8 to 9.3)                       | 0.2 (0.1 to 0.4) | 4.1 (1.4 to 8.2)          | 0.3 (0.1 to 0.8)                   | 4.4 (1.5 to 8.9)                       |
| Chile    | Smoking                     | 1.3 (0.9 to 1.8) | 39.6 (24.5 to 55.1)       | 1.8 (1 to 2.8)                     | 41.4 (25.7 to 57.7)                    | 0.9 (0.6 to 1.3) | 25.1 (15.5 to 36)         | 2 (1 to 3.3)                       | 27.1 (16.5 to 38.9)                    |
| Chile    | Secondhand smoke            | 0.5 (0.1 to 0.9) | 14.3 (3.5 to 24.6)        | 0.7 (0.1 to 1.2)                   | 15 (3.7 to 25.8)                       | 0.4 (0.1 to 0.6) | 8.9 (2.2 to 15.5)         | 0.7 (0.2 to 1.4)                   | 9.6 (2.3 to 16.8)                      |
| Chile    | Metabolic risks             | 1.7 (0.6 to 3.2) | 29.9 (5.6 to 63.4)        | 1.6 (0.4 to 3.4)                   | 31.5 (6 to 66.5)                       | 2 (0.8 to 3.8)   | 34.3 (7.2 to 70.2)        | 2.9 (0.7 to 6.2)                   | 37.2 (8.2 to 75.6)                     |
| Chile    | High body-mass index        | 0.7 (0.1 to 1.6) | 9.4 (-5.6 to 25.8)        | 0.6 (-0.1 to 1.5)                  | 10 (-5.6 to 27.2)                      | 0.8 (0.2 to 1.7) | 10.1 (-4.5 to 27.1)       | 0.9 (-0.3 to 2.3)                  | 11 (-4.9 to 29.4)                      |
| Chile    | High fasting plasma glucose | 1.1 (0.2 to 2.4) | 21.8 (4.2 to 49.6)        | 1.1 (0.2 to 2.6)                   | 22.9 (4.4 to 52)                       | 1.3 (0.3 to 2.8) | 26.3 (5.2 to 58.1)        | 2.2 (0.4 to 5.4)                   | 28.5 (5.6 to 62.3)                     |
| China    | All risk factors            | 1.8 (1.1 to 2.8) | 51.6 (31.1 to 77.7)       | 2.2 (1.2 to 3.5)                   | 53.8 (32.6 to 81.3)                    | 2.5 (1.5 to 3.7) | 64.7 (38.9 to 96.4)       | 6.3 (3.5 to 10)                    | 71 (43 to 105)                         |
| China    | Behavioral risks            | 1 (0.6 to 1.4)   | 30.2 (18.5 to 41.8)       | 1.2 (0.7 to 1.9)                   | 31.4 (19.3 to 43.5)                    | 1.1 (0.8 to 1.5) | 31.4 (21.2 to 43.2)       | 3.1 (1.8 to 4.6)                   | 34.4 (23.4 to 46.4)                    |
| China    | Alcohol use                 | 0.2 (0.1 to 0.3) | 5.8 (4.1 to 7.9)          | 0.2 (0.1 to 0.4)                   | 6 (4.3 to 8.2)                         | 0.2 (0.1 to 0.3) | 6.1 (4.1 to 8.3)          | 0.6 (0.4 to 0.9)                   | 6.7 (4.5 to 9.1)                       |
| China    | Diet high in red meat       | 0.3 (0.1 to 0.4) | 9 (3.2 to 13.3)           | 0.4 (0.1 to 0.6)                   | 9.4 (3.3 to 13.7)                      | 0.4 (0.2 to 0.6) | 12.2 (5.6 to 17.9)        | 1.2 (0.5 to 1.9)                   | 13.4 (6.2 to 19.4)                     |
| China    | Low physical activity       | 0.1 (0 to 0.1)   | 1.9 (1 to 3.5)            | 0.1 (0 to 0.2)                     | 2 (1.1 to 3.7)                         | 0.1 (0 to 0.2)   | 1.8 (1 to 3.4)            | 0.2 (0.1 to 0.4)                   | 2 (1.1 to 3.8)                         |
| China    | Smoking                     | 0.1 (0.1 to 0.1) | 1.9 (1.1 to 3)            | 0.1 (0 to 0.2)                     | 2 (1.2 to 3.1)                         | 0.1 (0.1 to 0.2) | 2.5 (1.6 to 3.6)          | 0.2 (0.1 to 0.4)                   | 2.7 (1.8 to 3.9)                       |
| China    | Secondhand smoke            | 0.4 (0.1 to 0.7) | 12.8 (3.1 to 22.6)        | 0.5 (0.1 to 1)                     | 13.3 (3.2 to 23.5)                     | 0.3 (0.1 to 0.6) | 10.2 (2.4 to 18.2)        | 1 (0.2 to 1.8)                     | 11.1 (2.6 to 19.6)                     |
| China    | Metabolic risks             | 0.9 (0.3 to 1.9) | 24 (7.4 to 48.3)          | 1.1 (0.3 to 2.2)                   | 25.1 (7.7 to 50.4)                     | 1.6 (0.6 to 2.8) | 38.1 (14.2 to 68.2)       | 3.7 (1.3 to 7)                     | 41.8 (15.7 to 74.8)                    |
| China    | High body-mass index        | 0.5 (0.1 to 1.2) | 13.2 (2.4 to 31.9)        | 0.6 (0.1 to 1.5)                   | 13.8 (2.5 to 33.2)                     | 1.1 (0.3 to 2.3) | 27.4 (7.6 to 56)          | 2.6 (0.7 to 5.4)                   | 30 (8.4 to 60.7)                       |
| China    | High fasting plasma glucose | 0.5 (0.1 to 1)   | 11.6 (2.1 to 27.2)        | 0.5 (0.1 to 1.3)                   | 12.1 (2.2 to 28.1)                     | 0.5 (0.1 to 1.2) | 12.5 (2.3 to 29.8)        | 1.2 (0.2 to 3)                     | 13.7 (2.5 to 32.4)                     |
| Colombia | All risk factors            | 3.4 (2.3 to 4.7) | 86.2 (59.3 to 117.6)      | 3.6 (2.1 to 5.4)                   | 89.8 (61.3 to 122)                     | 2.5 (1.5 to 4.1) | 62.8 (36.2 to 102.7)      | 4.7 (2.5 to 7.8)                   | 67.4 (38.7 to 110.1)                   |
| Colombia | Behavioral risks            | 2 (1.6 to 2.4)   | 59.4 (46.6 to 70.7)       | 2.3 (1.6 to 3.2)                   | 61.7 (48.4 to 73.3)                    | 1.3 (0.9 to 1.8) | 38.8 (26.4 to 53.8)       | 2.7 (1.6 to 4.2)                   | 41.5 (28.3 to 57.4)                    |
| Colombia | Alcohol use                 | 0.6 (0.5 to 0.8) | 21.4 (16.4 to 26.8)       | 0.8 (0.5 to 1.2)                   | 22.2 (17 to 27.9)                      | 0.4 (0.3 to 0.6) | 13.5 (9 to 19.9)          | 0.9 (0.5 to 1.4)                   | 14.4 (9.6 to 21.1)                     |
| Colombia | Diet high in red meat       | 0.5 (0.1 to 0.6) | 13.6 (4.6 to 17.9)        | 0.5 (0.2 to 0.8)                   | 14.1 (4.7 to 18.6)                     | 0.4 (0.1 to 0.6) | 11.5 (3.8 to 18)          | 0.8 (0.3 to 1.4)                   | 12.3 (4.2 to 19.1)                     |
| Colombia | Low physical activity       | 0.1 (0.1 to 0.2) | 2.8 (1.3 to 5.8)          | 0.1 (0.1 to 0.3)                   | 2.9 (1.4 to 6.1)                       | 0.1 (0 to 0.2)   | 2.7 (1.1 to 5.8)          | 0.2 (0.1 to 0.5)                   | 2.9 (1.2 to 6.3)                       |
| Colombia | Smoking                     | 0.6 (0.4 to 0.9) | 15.7 (9.8 to 22.7)        | 0.7 (0.4 to 1.1)                   | 16.4 (10.2 to 23.7)                    | 0.3 (0.2 to 0.4) | 6.9 (3.9 to 10.9)         | 0.5 (0.3 to 0.9)                   | 7.4 (4.2 to 11.6)                      |
| Colombia | Secondhand smoke            | 0.3 (0.1 to 0.5) | 9.1 (2.2 to 15.9)         | 0.4 (0.1 to 0.7)                   | 9.5 (2.3 to 16.5)                      | 0.2 (0 to 0.4)   | 6 (1.4 to 11.5)           | 0.4 (0.1 to 0.8)                   | 6.4 (1.5 to 12.2)                      |
| Colombia | Metabolic risks             | 1.6 (0.5 to 3)   | 31.1 (6.9 to 64.1)        | 1.4 (0.4 to 3)                     | 32.5 (7.2 to 66.9)                     | 1.4 (0.4 to 2.8) | 27 (4 to 61.7)            | 2.2 (0.4 to 4.9)                   | 29.1 (4.5 to 66.5)                     |
| Colombia | High body-mass index        | 0.5 (0 to 1)     | 6.3 (-3.9 to 17.6)        | 0.3 (-0.1 to 0.9)                  | 6.7 (-4 to 18.4)                       | 0.5 (0 to 1.1)   | 5.1 (-7.3 to 18.3)        | 0.5 (-0.4 to 1.6)                  | 5.6 (-7.6 to 20)                       |
| Colombia | High fasting plasma glucose | 1.2 (0.2 to 2.6) | 25.9 (5 to 57.9)          | 1.1 (0.2 to 2.7)                   | 27 (5.2 to 60.3)                       | 1 (0.2 to 2.4)   | 23.1 (4.3 to 56.9)        | 1.8 (0.3 to 4.4)                   | 24.9 (4.6 to 60.8)                     |
| Comoros  | All risk factors            | 1.4 (0.7 to 2.4) | 33.3 (15 to 58.4)         | 0.8 (0.4 to 1.5)                   | 34.1 (15.4 to 59.7)                    | 2.2 (1.2 to 3.6) | 48.8 (24 to 82.2)         | 1.4 (0.7 to 2.5)                   | 50.2 (24.9 to 84.3)                    |
| Comoros  | Behavioral risks            | 0.8 (0.3 to 1.3) | 22.4 (8.7 to 38.7)        | 0.5 (0.2 to 0.9)                   | 22.9 (8.9 to 39.5)                     | 1 (0.6 to 1.6)   | 29.8 (16.4 to 46.8)       | 0.8 (0.4 to 1.3)                   | 30.6 (16.8 to 48)                      |
| Comoros  | Alcohol use                 | 0.1 (0 to 0.2)   | 2.6 (0.8 to 5.3)          | 0.1 (0 to 0.1)                     | 2.7 (0.8 to 5.4)                       | 0.2 (0.1 to 0.3) | 5.7 (2.2 to 10.3)         | 0.2 (0.1 to 0.3)                   | 5.8 (2.3 to 10.6)                      |
| Comoros  | Diet high in red meat       | 0.2 (0 to 0.3)   | 4.8 (1 to 8.8)            | 0.1 (0 to 0.2)                     | 4.9 (1 to 9)                           | 0.2 (0 to 0.3)   | 5.8 (1.3 to 9.7)          | 0.2 (0 to 0.3)                     | 5.9 (1.3 to 10)                        |
| Comoros  | Low physical activity       | 0.1 (0 to 0.1)   | 1.5 (0.6 to 3.9)          | 0 (0 to 0.1)                       | 1.5 (0.7 to 4)                         | 0.1 (0.1 to 0.2) | 2 (1.2 to 4.9)            | 0.1 (0 to 0.1)                     | 2.1 (1.3 to 5)                         |
| Comoros  | Smoking                     | 0.1 (0 to 0.2)   | 2.2 (0.9 to 4.2)          | 0.1 (0 to 0.1)                     | 2.3 (0.9 to 4.3)                       | 0.1 (0.1 to 0.2) | 2.8 (1.3 to 4.8)          | 0.1 (0 to 0.1)                     | 2.9 (1.3 to 4.9)                       |

| Location     | Risk factor                 | 1990               |                           |                                    |                                        | 2019               |                           |                                    |                                        |
|--------------|-----------------------------|--------------------|---------------------------|------------------------------------|----------------------------------------|--------------------|---------------------------|------------------------------------|----------------------------------------|
|              |                             | Deaths             | YLLs (Years of Life Lost) | YLDs (Years Lived with Disability) | DALYs (Disability-Adjusted Life Years) | Deaths             | YLLs (Years of Life Lost) | YLDs (Years Lived with Disability) | DALYs (Disability-Adjusted Life Years) |
| Comoros      | Secondhand smoke            | 0.4 (0.1 to 0.8)   | 11.7 (2.2 to 24.2)        | 0.3 (0 to 0.5)                     | 12 (2.2 to 24.7)                       | 0.5 (0.1 to 0.9)   | 14.2 (3.1 to 26.7)        | 0.4 (0.1 to 0.8)                   | 14.6 (3.2 to 27.5)                     |
| Comoros      | Metabolic risks             | 0.7 (0.2 to 1.5)   | 11.4 (0.2 to 29.3)        | 0.3 (0.1 to 0.8)                   | 11.8 (0.3 to 30)                       | 1.2 (0.3 to 2.5)   | 19.9 (-0.1 to 47.9)       | 0.6 (0.1 to 1.5)                   | 20.6 (0.1 to 49.4)                     |
| Comoros      | High body-mass index        | 0.2 (0 to 0.6)     | 1.6 (-5.4 to 9.8)         | 0.1 (-0.1 to 0.3)                  | 1.7 (-5.5 to 10.1)                     | 0.4 (0 to 1)       | 3.3 (-9 to 17.5)          | 0.2 (-0.2 to 0.6)                  | 3.5 (-9.1 to 18)                       |
| Comoros      | High fasting plasma glucose | 0.5 (0.1 to 1.2)   | 10 (1.6 to 26.3)          | 0.3 (0 to 0.7)                     | 10.3 (1.7 to 26.8)                     | 0.8 (0.1 to 1.9)   | 17.1 (3.1 to 42.9)        | 0.5 (0.1 to 1.3)                   | 17.6 (3.1 to 44.2)                     |
| Congo        | All risk factors            | 4.5 (2.7 to 6.9)   | 118.7 (70.9 to 182.9)     | 2.7 (1.6 to 4.3)                   | 121.4 (72.8 to 186.6)                  | 6.6 (3.4 to 10.8)  | 162.4 (83.6 to 267.9)     | 4.6 (2.4 to 8)                     | 167 (86.5 to 275.9)                    |
| Congo        | Behavioral risks            | 3 (2 to 4.3)       | 87.7 (55.3 to 130.5)      | 1.9 (1.1 to 3)                     | 89.6 (56.6 to 132.7)                   | 3.9 (2.2 to 6.1)   | 110.4 (59.9 to 176)       | 3 (1.6 to 5.1)                     | 113.4 (61.8 to 181.1)                  |
| Congo        | Alcohol use                 | 1.9 (1.2 to 2.9)   | 57.9 (35.2 to 88.6)       | 1.3 (0.7 to 2)                     | 59.2 (35.9 to 90.3)                    | 2.6 (1.3 to 4.2)   | 73.4 (37.5 to 121.2)      | 2 (1 to 3.5)                       | 75.4 (38.7 to 124.3)                   |
| Congo        | Diet high in red meat       | 0.4 (0.1 to 0.7)   | 11.9 (2.1 to 20.3)        | 0.3 (0 to 0.5)                     | 12.1 (2.1 to 20.8)                     | 0.5 (0.1 to 1)     | 16 (3.1 to 28.6)          | 0.4 (0.1 to 0.8)                   | 16.4 (3.2 to 29.4)                     |
| Congo        | Low physical activity       | 0.3 (0.1 to 0.6)   | 6.9 (3.1 to 14.1)         | 0.2 (0.1 to 0.3)                   | 7.1 (3.2 to 14.6)                      | 0.4 (0.2 to 0.8)   | 8.7 (3.5 to 17.4)         | 0.3 (0.1 to 0.5)                   | 8.9 (3.7 to 17.8)                      |
| Congo        | Smoking                     | 0.1 (0.1 to 0.2)   | 3.1 (1.4 to 5.7)          | 0.1 (0 to 0.1)                     | 3.2 (1.5 to 5.8)                       | 0.1 (0.1 to 0.2)   | 3.3 (1.5 to 6.3)          | 0.1 (0 to 0.2)                     | 3.4 (1.5 to 6.5)                       |
| Congo        | Secondhand smoke            | 0.3 (0.1 to 0.7)   | 11 (2.3 to 21.8)          | 0.2 (0.1 to 0.5)                   | 11.2 (2.3 to 22.3)                     | 0.4 (0.1 to 0.9)   | 13.4 (2.6 to 27.5)        | 0.4 (0.1 to 0.7)                   | 13.7 (2.7 to 28.3)                     |
| Congo        | Metabolic risks             | 1.7 (0.5 to 3.7)   | 35 (5.1 to 80.9)          | 0.9 (0.2 to 2.1)                   | 35.9 (5.3 to 83)                       | 3 (0.9 to 6.6)     | 59.6 (10.2 to 141.3)      | 1.8 (0.4 to 4.2)                   | 61.4 (10.6 to 145.3)                   |
| Congo        | High body-mass index        | 0.5 (0 to 1.3)     | 6.9 (-7.1 to 23.4)        | 0.2 (-0.1 to 0.6)                  | 7.2 (-7.2 to 24.1)                     | 1.1 (0.1 to 2.5)   | 14.9 (-9.3 to 45.7)       | 0.5 (-0.1 to 1.5)                  | 15.4 (-9.4 to 47)                      |
| Congo        | High fasting plasma glucose | 1.2 (0.2 to 3.1)   | 28.8 (5.3 to 73.5)        | 0.7 (0.1 to 1.8)                   | 29.5 (5.5 to 75)                       | 2 (0.4 to 5.1)     | 46.9 (8.4 to 119.2)       | 1.4 (0.3 to 3.5)                   | 48.2 (8.6 to 122.7)                    |
| Cook Islands | All risk factors            | 15.9 (8.8 to 24.1) | 397.9 (230.1 to 594.7)    | 16.6 (8.8 to 26.7)                 | 414.4 (240.5 to 613.7)                 | 17.8 (10.6 to 26)  | 418.8 (251.9 to 612.7)    | 24.6 (13.8 to 38.5)                | 443.4 (268.3 to 651)                   |
| Cook Islands | Behavioral risks            | 5.2 (3.2 to 7.5)   | 146.6 (88.4 to 210.5)     | 6.1 (3.5 to 9.6)                   | 152.7 (92 to 219)                      | 5.6 (3.8 to 7.8)   | 152.9 (97.9 to 213.5)     | 9.1 (5.3 to 13.9)                  | 162.1 (103.9 to 226.2)                 |
| Cook Islands | Alcohol use                 | 0.2 (0 to 0.6)     | 8.6 (0 to 21)             | 0.4 (0 to 0.9)                     | 9 (0 to 21.9)                          | 1.2 (0.6 to 1.9)   | 39.9 (20.5 to 63)         | 2.4 (1.1 to 4.1)                   | 42.3 (21.6 to 66.8)                    |
| Cook Islands | Diet high in red meat       | 1.2 (0.4 to 2)     | 36.9 (11.9 to 59.6)       | 1.5 (0.5 to 2.6)                   | 38.5 (12.4 to 62.2)                    | 1.2 (0.4 to 1.9)   | 33.4 (11.7 to 52.8)       | 2 (0.7 to 3.4)                     | 35.4 (12.4 to 55.8)                    |
| Cook Islands | Low physical activity       | 0.7 (0.3 to 1.3)   | 15.9 (6.1 to 31.1)        | 0.7 (0.3 to 1.4)                   | 16.5 (6.3 to 32.6)                     | 0.8 (0.3 to 1.5)   | 17.3 (6.1 to 32.3)        | 1 (0.3 to 2.1)                     | 18.3 (6.4 to 34.2)                     |
| Cook Islands | Smoking                     | 1.6 (0.9 to 2.5)   | 42.6 (21.9 to 70.5)       | 1.8 (0.8 to 3.1)                   | 44.4 (23.1 to 73.6)                    | 1.3 (0.8 to 2)     | 33.1 (17.8 to 51.9)       | 2 (1 to 3.4)                       | 35 (19.1 to 54.9)                      |
| Cook Islands | Secondhand smoke            | 1.7 (0.4 to 3.1)   | 50 (10.8 to 92.4)         | 2.1 (0.5 to 4)                     | 52.1 (11.2 to 96.2)                    | 1.4 (0.3 to 2.6)   | 39.6 (9.5 to 72.8)        | 2.4 (0.6 to 4.5)                   | 41.9 (10.1 to 76.8)                    |
| Cook Islands | Metabolic risks             | 12.3 (5.2 to 20.5) | 289.7 (125.1 to 481.1)    | 12 (4.9 to 21.2)                   | 301.7 (130.6 to 499.7)                 | 14.3 (6.7 to 22.5) | 314.9 (149.6 to 509.7)    | 18.3 (8.4 to 31.3)                 | 333.2 (158.9 to 536.1)                 |
| Cook Islands | High body-mass index        | 9.3 (3 to 17.2)    | 219.5 (75.1 to 399.2)     | 9.1 (2.9 to 17.5)                  | 228.5 (77.9 to 414)                    | 10.3 (3.5 to 17.5) | 225.4 (80.3 to 377.3)     | 13 (4.6 to 23.1)                   | 238.4 (85.7 to 400.4)                  |
| Cook Islands | High fasting plasma glucose | 4.1 (0.8 to 9.2)   | 93.1 (17.7 to 212.1)      | 3.9 (0.7 to 9.4)                   | 97.1 (18.6 to 220.3)                   | 5.7 (1.2 to 12.5)  | 125.3 (26.4 to 282.4)     | 7.4 (1.6 to 18.1)                  | 132.7 (27.9 to 298.7)                  |
| Costa Rica   | All risk factors            | 3.2 (2.2 to 4.5)   | 82.6 (57.9 to 112.1)      | 4.8 (2.8 to 7.1)                   | 87.3 (60.6 to 118.6)                   | 3.5 (2.1 to 5.7)   | 79.9 (47.7 to 126.9)      | 6.8 (3.7 to 11.8)                  | 86.7 (52.1 to 137.2)                   |
| Costa Rica   | Behavioral risks            | 2 (1.5 to 2.4)     | 60.1 (47.2 to 72.2)       | 3.3 (2.1 to 4.7)                   | 63.4 (49.9 to 76.2)                    | 1.7 (1.1 to 2.2)   | 46 (31.6 to 62.9)         | 3.7 (2.2 to 5.7)                   | 49.7 (34.5 to 68.2)                    |
| Costa Rica   | Alcohol use                 | 0.7 (0.5 to 0.9)   | 23.3 (17.8 to 29.1)       | 1.2 (0.8 to 1.8)                   | 24.5 (18.6 to 30.6)                    | 0.6 (0.4 to 0.8)   | 18 (11.7 to 25.4)         | 1.4 (0.8 to 2.2)                   | 19.4 (12.7 to 27.4)                    |
| Costa Rica   | Diet high in red meat       | 0.4 (0.1 to 0.6)   | 13.2 (4.5 to 17.6)        | 0.7 (0.2 to 1.1)                   | 14 (4.7 to 18.5)                       | 0.4 (0.1 to 0.6)   | 11.4 (3.2 to 17.7)        | 0.9 (0.3 to 1.6)                   | 12.3 (3.5 to 19.1)                     |
| Costa Rica   | Low physical activity       | 0.1 (0 to 0.2)     | 2 (1.1 to 4.1)            | 0.1 (0.1 to 0.2)                   | 2.1 (1.2 to 4.4)                       | 0.1 (0 to 0.2)     | 2.2 (1.1 to 4.5)          | 0.2 (0.1 to 0.4)                   | 2.4 (1.2 to 4.9)                       |
| Costa Rica   | Smoking                     | 0.5 (0.3 to 0.7)   | 13.8 (8.6 to 20.1)        | 0.8 (0.4 to 1.3)                   | 14.6 (9 to 21.2)                       | 0.4 (0.2 to 0.6)   | 8.8 (5.3 to 13.6)         | 0.7 (0.4 to 1.2)                   | 9.5 (5.7 to 14.8)                      |
| Costa Rica   | Secondhand smoke            | 0.4 (0.1 to 0.7)   | 11.4 (2.7 to 19.8)        | 0.6 (0.1 to 1.2)                   | 12 (2.8 to 20.8)                       | 0.3 (0.1 to 0.5)   | 7.8 (1.9 to 14.3)         | 0.6 (0.1 to 1.2)                   | 8.4 (2 to 15.4)                        |
| Costa Rica   | Metabolic risks             | 1.4 (0.5 to 2.8)   | 25.8 (3.1 to 55.8)        | 1.7 (0.3 to 3.6)                   | 27.5 (3.4 to 58.7)                     | 2.1 (0.7 to 4.2)   | 37.7 (7.1 to 84.5)        | 3.5 (0.9 to 7.6)                   | 41.2 (7.9 to 91.3)                     |
| Costa Rica   | High body-mass index        | 0.5 (0 to 1.1)     | 5.1 (-7 to 18.3)          | 0.4 (-0.3 to 1.3)                  | 5.5 (-7.3 to 19.5)                     | 0.7 (0.1 to 1.7)   | 9.1 (-6 to 27.1)          | 1 (-0.3 to 2.6)                    | 10.1 (-6.3 to 29.5)                    |
| Costa Rica   | High fasting plasma glucose | 1 (0.2 to 2.3)     | 21.7 (4.4 to 49.2)        | 1.3 (0.3 to 3.1)                   | 23.1 (4.6 to 52.3)                     | 1.4 (0.3 to 3.4)   | 30.5 (5.9 to 73.7)        | 2.7 (0.5 to 6.7)                   | 33.1 (6.4 to 79.3)                     |
| Croatia      | All risk factors            | 7.7 (6 to 9.7)     | 196.8 (155.4 to 241.9)    | 12.9 (8.4 to 18.2)                 | 209.7 (165.7 to 257.2)                 | 6.5 (4.5 to 9.5)   | 147.1 (102.2 to 209.3)    | 14.3 (8.8 to 22.4)                 | 161.4 (112.1 to 229)                   |
| Croatia      | Behavioral risks            | 5.7 (4.7 to 6.8)   | 161.6 (131.9 to 192.5)    | 10.5 (7.1 to 14.9)                 | 172.2 (140.4 to 205.3)                 | 4.1 (3 to 5.4)     | 104.6 (76 to 141.2)       | 10.3 (6.2 to 15.1)                 | 114.9 (83.5 to 154.6)                  |
| Croatia      | Alcohol use                 | 2.5 (1.9 to 3.2)   | 70.1 (53.4 to 88.7)       | 4.6 (2.9 to 6.7)                   | 74.7 (57 to 95.4)                      | 1.7 (1.1 to 2.3)   | 43.2 (29.3 to 61.3)       | 4.3 (2.5 to 6.5)                   | 47.5 (32.2 to 67.2)                    |

| Location      | Risk factor                 | 1990              |                           |                                    |                                        | 2019             |                           |                                    |                                        |
|---------------|-----------------------------|-------------------|---------------------------|------------------------------------|----------------------------------------|------------------|---------------------------|------------------------------------|----------------------------------------|
|               |                             | Deaths            | YLLs (Years of Life Lost) | YLDs (Years Lived with Disability) | DALYs (Disability-Adjusted Life Years) | Deaths           | YLLs (Years of Life Lost) | YLDs (Years Lived with Disability) | DALYs (Disability-Adjusted Life Years) |
| Croatia       | Diet high in red meat       | 0.6 (0.2 to 0.9)  | 17.7 (4.7 to 24)          | 1.2 (0.3 to 1.9)                   | 18.9 (5 to 25.6)                       | 0.7 (0.2 to 1)   | 17.2 (6.1 to 26.1)        | 1.7 (0.6 to 2.9)                   | 18.9 (6.7 to 28.8)                     |
| Croatia       | Low physical activity       | 0.2 (0.1 to 0.4)  | 5 (3 to 8.7)              | 0.3 (0.2 to 0.6)                   | 5.3 (3.2 to 9.3)                       | 0.2 (0.1 to 0.4) | 4.3 (2.2 to 7.3)          | 0.4 (0.2 to 0.8)                   | 4.7 (2.5 to 8)                         |
| Croatia       | Smoking                     | 2.2 (1.5 to 2.8)  | 62.8 (44.5 to 82.8)       | 4.1 (2.4 to 6.3)                   | 66.9 (47.3 to 88.7)                    | 1.4 (0.9 to 1.9) | 36.3 (24.3 to 53)         | 3.6 (2 to 5.7)                     | 39.8 (26.6 to 58.3)                    |
| Croatia       | Secondhand smoke            | 0.8 (0.2 to 1.4)  | 22.2 (5.5 to 38.9)        | 1.4 (0.3 to 2.7)                   | 23.6 (5.8 to 41.7)                     | 0.5 (0.1 to 1)   | 13.3 (3.2 to 25)          | 1.3 (0.3 to 2.5)                   | 14.6 (3.5 to 27)                       |
| Croatia       | Metabolic risks             | 2.6 (1 to 4.7)    | 46.7 (11.1 to 90.6)       | 3.1 (0.7 to 6.2)                   | 49.8 (12 to 96.2)                      | 3 (1.2 to 5.7)   | 54.5 (17.8 to 108.2)      | 5.2 (1.6 to 10.5)                  | 59.7 (19.5 to 117.3)                   |
| Croatia       | High body-mass index        | 1.2 (0.3 to 2.5)  | 18.4 (-3.9 to 44.1)       | 1.2 (-0.2 to 3)                    | 19.6 (-4.1 to 47.2)                    | 1.5 (0.4 to 2.9) | 23.5 (2.3 to 51.1)        | 2.2 (0.1 to 4.7)                   | 25.7 (2.5 to 55.4)                     |
| Croatia       | High fasting plasma glucose | 1.5 (0.3 to 3.3)  | 30.2 (5.8 to 69.3)        | 2 (0.4 to 5)                       | 32.3 (6.1 to 74)                       | 1.8 (0.3 to 4.1) | 33.9 (6.4 to 80.8)        | 3.3 (0.6 to 8.1)                   | 37.2 (7.1 to 88.6)                     |
| Cuba          | All risk factors            | 4.7 (3.3 to 6.4)  | 119 (84.5 to 158)         | 7 (4.4 to 10.3)                    | 126 (89.3 to 167)                      | 4.7 (3.2 to 6.9) | 108.4 (72.4 to 157.6)     | 9.2 (5.4 to 14.1)                  | 117.6 (78.9 to 170.7)                  |
| Cuba          | Behavioral risks            | 3.1 (2.4 to 3.6)  | 87.7 (70.5 to 104.3)      | 4.9 (3.3 to 7)                     | 92.6 (74.1 to 110.3)                   | 2.7 (2 to 3.5)   | 71.9 (52.6 to 94)         | 5.9 (3.7 to 8.6)                   | 77.8 (57.3 to 101.9)                   |
| Cuba          | Alcohol use                 | 0.8 (0.6 to 1)    | 27.2 (20.8 to 34.1)       | 1.5 (1 to 2.2)                     | 28.7 (21.9 to 36)                      | 0.8 (0.5 to 1)   | 23.7 (16.5 to 32)         | 1.9 (1.2 to 2.9)                   | 25.6 (17.8 to 34.6)                    |
| Cuba          | Diet high in red meat       | 0.5 (0.1 to 0.7)  | 15.4 (4.6 to 20.3)        | 0.9 (0.3 to 1.3)                   | 16.3 (4.9 to 21.5)                     | 0.5 (0.1 to 0.7) | 13.7 (4.2 to 20.7)        | 1.1 (0.3 to 1.9)                   | 14.8 (4.6 to 22.3)                     |
| Cuba          | Low physical activity       | 0.3 (0.1 to 0.6)  | 7.3 (2.6 to 14)           | 0.4 (0.2 to 0.9)                   | 7.8 (2.7 to 14.8)                      | 0.4 (0.1 to 0.7) | 7.7 (2.7 to 14.4)         | 0.7 (0.2 to 1.4)                   | 8.4 (2.9 to 15.8)                      |
| Cuba          | Smoking                     | 1.1 (0.8 to 1.5)  | 29.9 (20.6 to 41)         | 1.7 (1 to 2.7)                     | 31.7 (21.8 to 43.4)                    | 0.9 (0.6 to 1.3) | 23.2 (14.9 to 33.5)       | 2 (1.1 to 3.1)                     | 25.1 (16.1 to 36.3)                    |
| Cuba          | Secondhand smoke            | 0.5 (0.1 to 0.8)  | 13.7 (3.2 to 24)          | 0.8 (0.2 to 1.4)                   | 14.5 (3.5 to 25.3)                     | 0.3 (0.1 to 0.5) | 8.4 (1.9 to 15.1)         | 0.7 (0.1 to 1.3)                   | 9.1 (2.1 to 16.3)                      |
| Cuba          | Metabolic risks             | 2 (0.6 to 3.8)    | 37.7 (5.9 to 80.9)        | 2.4 (0.6 to 5.2)                   | 40.2 (6.5 to 85.6)                     | 2.4 (0.8 to 4.7) | 43.8 (8.9 to 93.6)        | 3.9 (1 to 8.3)                     | 47.7 (9.8 to 101.9)                    |
| Cuba          | High body-mass index        | 0.7 (0.1 to 1.5)  | 8.5 (-8 to 25.6)          | 0.7 (-0.3 to 1.9)                  | 9.2 (-8.3 to 28)                       | 1 (0.2 to 2)     | 13.2 (-6.5 to 34.5)       | 1.3 (-0.4 to 3.3)                  | 14.5 (-6.8 to 37.7)                    |
| Cuba          | High fasting plasma glucose | 1.4 (0.3 to 3.1)  | 30.7 (5.9 to 69.1)        | 1.9 (0.3 to 4.4)                   | 32.5 (6.2 to 73.8)                     | 1.6 (0.3 to 3.5) | 32.7 (6.4 to 75)          | 2.8 (0.5 to 7)                     | 35.5 (6.9 to 81.6)                     |
| Cyprus        | All risk factors            | 7.4 (5.2 to 10.3) | 178.7 (129.6 to 237.3)    | 13.5 (8.5 to 20.1)                 | 192.3 (139.8 to 255.4)                 | 6.8 (4.7 to 9.4) | 151.5 (108.9 to 205.8)    | 22.1 (13.3 to 34)                  | 173.7 (126.3 to 235.4)                 |
| Cyprus        | Behavioral risks            | 4.9 (3.9 to 6.1)  | 135.1 (105.9 to 170.3)    | 9.9 (6.3 to 14.2)                  | 145 (113.9 to 182.7)                   | 4.1 (3.2 to 5.1) | 105.1 (81.4 to 130.9)     | 15.3 (9.8 to 22.8)                 | 120.5 (93.3 to 151.2)                  |
| Cyprus        | Alcohol use                 | 2 (1.5 to 2.5)    | 55.5 (42 to 72.3)         | 4 (2.5 to 5.9)                     | 59.6 (45 to 77.1)                      | 1.7 (1.2 to 2.2) | 45.2 (32.8 to 58.7)       | 6.6 (4 to 10)                      | 51.8 (37.2 to 66.9)                    |
| Cyprus        | Diet high in red meat       | 1.1 (0.5 to 1.6)  | 30.5 (14.8 to 43.2)       | 2.2 (0.9 to 3.6)                   | 32.7 (16 to 46.3)                      | 0.9 (0.3 to 1.2) | 21.3 (8.5 to 30.2)        | 3.1 (1.2 to 5.2)                   | 24.4 (9.8 to 34.9)                     |
| Cyprus        | Low physical activity       | 0.3 (0.1 to 0.6)  | 6.1 (2.6 to 12.7)         | 0.5 (0.2 to 1.1)                   | 6.6 (2.8 to 13.8)                      | 0.3 (0.1 to 0.6) | 5.8 (2.2 to 11.8)         | 0.8 (0.3 to 1.9)                   | 6.6 (2.5 to 13.6)                      |
| Cyprus        | Smoking                     | 1.3 (0.9 to 1.8)  | 37.9 (24.6 to 54.6)       | 2.8 (1.6 to 4.4)                   | 40.6 (26.5 to 59.1)                    | 1.1 (0.7 to 1.4) | 29 (19.9 to 38.9)         | 4.2 (2.4 to 6.6)                   | 33.3 (22.5 to 45)                      |
| Cyprus        | Secondhand smoke            | 0.6 (0.1 to 1.1)  | 17.4 (4 to 30.5)          | 1.3 (0.3 to 2.3)                   | 18.6 (4.4 to 32.8)                     | 0.5 (0.1 to 0.8) | 12.8 (3.2 to 22.8)        | 1.9 (0.4 to 3.6)                   | 14.7 (3.7 to 26.1)                     |
| Cyprus        | Metabolic risks             | 3.1 (1.1 to 5.9)  | 53.9 (15.8 to 107.8)      | 4.4 (1.4 to 9.4)                   | 58.3 (17.4 to 116.8)                   | 3.2 (1.2 to 6.1) | 57.4 (19.3 to 113.8)      | 8.4 (2.6 to 16.9)                  | 65.8 (22.2 to 129.3)                   |
| Cyprus        | High body-mass index        | 0.8 (0.2 to 1.8)  | 14 (0.2 to 33.2)          | 1.1 (0.1 to 2.6)                   | 15.2 (0.3 to 35.4)                     | 1 (0.3 to 2.1)   | 17.4 (1.8 to 38.7)        | 2.5 (0.2 to 5.7)                   | 19.9 (2 to 44.4)                       |
| Cyprus        | High fasting plasma glucose | 2.3 (0.5 to 5.1)  | 41.7 (8.7 to 93.7)        | 3.4 (0.7 to 8)                     | 45.1 (9.4 to 101.1)                    | 2.3 (0.5 to 5)   | 42.4 (8.3 to 92.3)        | 6.3 (1.2 to 14.8)                  | 48.7 (9.5 to 106.1)                    |
| Czechia       | All risk factors            | 8.6 (6.9 to 10.5) | 219.8 (177.6 to 264.6)    | 13.9 (9.2 to 19.3)                 | 233.7 (188.2 to 280.4)                 | 6.3 (4.5 to 8.9) | 142.5 (103.2 to 197.8)    | 14.9 (9.3 to 22.4)                 | 157.4 (114.1 to 218.1)                 |
| Czechia       | Behavioral risks            | 6.4 (5.4 to 7.3)  | 178.1 (151.6 to 202.9)    | 11.2 (7.5 to 15.5)                 | 189.4 (160.7 to 215.4)                 | 4 (3.1 to 5.1)   | 100.4 (77.7 to 130.1)     | 10.6 (6.9 to 15.4)                 | 111 (86.1 to 144.2)                    |
| Czechia       | Alcohol use                 | 3.3 (2.6 to 4)    | 94.8 (76.8 to 113.8)      | 6 (3.9 to 8.5)                     | 100.7 (81.2 to 121)                    | 2.1 (1.6 to 2.8) | 55.6 (40.8 to 74.4)       | 5.9 (3.7 to 8.8)                   | 61.5 (45.1 to 82)                      |
| Czechia       | Diet high in red meat       | 1.2 (0.6 to 1.6)  | 33.1 (16.4 to 44.1)       | 2.1 (0.9 to 3.3)                   | 35.2 (17.4 to 47)                      | 0.7 (0.3 to 1)   | 17.9 (8 to 26.4)          | 1.9 (0.8 to 3.1)                   | 19.8 (8.9 to 29.1)                     |
| Czechia       | Low physical activity       | 0.3 (0.1 to 0.4)  | 5.7 (3.2 to 9.7)          | 0.4 (0.2 to 0.7)                   | 6.1 (3.4 to 10.4)                      | 0.2 (0.1 to 0.4) | 4.3 (2.1 to 7.6)          | 0.4 (0.2 to 0.9)                   | 4.8 (2.4 to 8.4)                       |
| Czechia       | Smoking                     | 1.8 (1.3 to 2.3)  | 48.7 (33.9 to 65.2)       | 3.1 (1.8 to 4.8)                   | 51.8 (35.8 to 69.6)                    | 1 (0.7 to 1.4)   | 25.1 (17.5 to 35.6)       | 2.7 (1.6 to 4.2)                   | 27.8 (19.3 to 39.3)                    |
| Czechia       | Secondhand smoke            | 0.5 (0.1 to 0.9)  | 15.8 (3.7 to 27.7)        | 1 (0.2 to 1.8)                     | 16.8 (3.8 to 29.4)                     | 0.3 (0.1 to 0.5) | 7.6 (1.9 to 13.8)         | 0.8 (0.2 to 1.6)                   | 8.4 (2.1 to 15.3)                      |
| Czechia       | Metabolic risks             | 3 (1.2 to 5.4)    | 57.1 (16.8 to 108.7)      | 3.6 (1.1 to 7.4)                   | 60.7 (18.1 to 114.9)                   | 3.1 (1.3 to 5.7) | 56.7 (20.5 to 111.5)      | 5.8 (1.9 to 11.7)                  | 62.5 (22.6 to 122.1)                   |
| Czechia       | High body-mass index        | 1.4 (0.3 to 2.6)  | 22.8 (-0.6 to 49.3)       | 1.4 (0 to 3.3)                     | 24.2 (-0.7 to 52.9)                    | 1.3 (0.4 to 2.6) | 21.4 (3 to 46)            | 2.1 (0.2 to 4.7)                   | 23.5 (3.2 to 50.9)                     |
| Czechia       | High fasting plasma glucose | 1.7 (0.3 to 3.8)  | 36.9 (7 to 82.1)          | 2.4 (0.4 to 5.7)                   | 39.2 (7.5 to 87.1)                     | 2 (0.4 to 4.5)   | 38.9 (7.7 to 89.3)        | 4 (0.8 to 9.5)                     | 43 (8.6 to 99.3)                       |
| Côte d'Ivoire | All risk factors            | 2.1 (1.3 to 3.1)  | 53.9 (33.3 to 78.5)       | 1.4 (0.8 to 2.2)                   | 55.2 (34.2 to 80.5)                    | 3.3 (2.1 to 5)   | 79.6 (49.4 to 121.9)      | 2.3 (1.3 to 3.7)                   | 81.8 (50.6 to 125.2)                   |
| Côte d'Ivoire | Behavioral risks            | 1.4 (1 to 1.9)    | 41.5 (27.3 to 57.2)       | 1 (0.6 to 1.4)                     | 42.4 (27.9 to 58.3)                    | 2 (1.3 to 2.8)   | 55.1 (36 to 79.4)         | 1.5 (0.9 to 2.3)                   | 56.6 (36.9 to 81.4)                    |

| Location                              | Risk factor                 | 1990                |                           |                                    |                                        | 2019              |                           |                                    |                                        |
|---------------------------------------|-----------------------------|---------------------|---------------------------|------------------------------------|----------------------------------------|-------------------|---------------------------|------------------------------------|----------------------------------------|
|                                       |                             | Deaths              | YLLs (Years of Life Lost) | YLDs (Years Lived with Disability) | DALYs (Disability-Adjusted Life Years) | Deaths            | YLLs (Years of Life Lost) | YLDs (Years Lived with Disability) | DALYs (Disability-Adjusted Life Years) |
| Côte d'Ivoire                         | Alcohol use                 | 0.7 (0.4 to 1.1)    | 21.8 (13.3 to 31.9)       | 0.5 (0.3 to 0.8)                   | 22.3 (13.7 to 32.6)                    | 1.1 (0.7 to 1.6)  | 31.4 (18.6 to 46.8)       | 0.8 (0.5 to 1.4)                   | 32.2 (19.2 to 48)                      |
| Côte d'Ivoire                         | Diet high in red meat       | 0.3 (0.1 to 0.4)    | 7.7 (1.5 to 11.8)         | 0.2 (0 to 0.3)                     | 7.9 (1.5 to 12.1)                      | 0.3 (0.1 to 0.5)  | 8.4 (1.6 to 13.9)         | 0.2 (0 to 0.4)                     | 8.6 (1.7 to 14.2)                      |
| Côte d'Ivoire                         | Low physical activity       | 0.1 (0.1 to 0.2)    | 2.5 (1.4 to 4.5)          | 0.1 (0 to 0.1)                     | 2.6 (1.4 to 4.7)                       | 0.2 (0.1 to 0.3)  | 3.3 (1.7 to 6.2)          | 0.1 (0 to 0.2)                     | 3.4 (1.7 to 6.4)                       |
| Côte d'Ivoire                         | Smoking                     | 0.1 (0.1 to 0.2)    | 2.8 (1.5 to 4.5)          | 0.1 (0 to 0.1)                     | 2.8 (1.5 to 4.6)                       | 0.2 (0.1 to 0.3)  | 3.8 (2 to 6.2)            | 0.1 (0.1 to 0.2)                   | 3.9 (2.1 to 6.4)                       |
| Côte d'Ivoire                         | Secondhand smoke            | 0.3 (0.1 to 0.5)    | 8.3 (1.9 to 15.4)         | 0.2 (0 to 0.4)                     | 8.5 (2 to 15.8)                        | 0.4 (0.1 to 0.7)  | 10.6 (2.4 to 20.2)        | 0.3 (0.1 to 0.5)                   | 10.9 (2.4 to 20.6)                     |
| Côte d'Ivoire                         | Metabolic risks             | 0.8 (0.2 to 1.6)    | 14 (1.1 to 33.6)          | 0.4 (0.1 to 0.9)                   | 14.4 (1.2 to 34.4)                     | 1.5 (0.5 to 3.2)  | 28 (3.4 to 64.5)          | 0.9 (0.2 to 2)                     | 28.9 (3.7 to 66.6)                     |
| Côte d'Ivoire                         | High body-mass index        | 0.3 (0 to 0.7)      | 2.7 (-5.1 to 11.9)        | 0.1 (-0.1 to 0.4)                  | 2.9 (-5.2 to 12.2)                     | 0.5 (0 to 1.1)    | 5 (-7.7 to 19.3)          | 0.2 (-0.1 to 0.7)                  | 5.2 (-7.8 to 19.8)                     |
| Côte d'Ivoire                         | High fasting plasma glucose | 0.5 (0.1 to 1.3)    | 11.6 (2.1 to 27.5)        | 0.3 (0.1 to 0.8)                   | 11.9 (2.1 to 28)                       | 1.1 (0.2 to 2.6)  | 24 (4.4 to 56.2)          | 0.7 (0.1 to 1.7)                   | 24.7 (4.5 to 57.8)                     |
| Democratic People's Republic of Korea | All risk factors            | 1.8 (0.9 to 2.9)    | 51.6 (27.5 to 86.5)       | 2 (1 to 3.5)                       | 53.6 (28.5 to 90)                      | 2.3 (1.2 to 3.7)  | 65.9 (34.8 to 108.9)      | 2.8 (1.4 to 4.9)                   | 68.7 (36.1 to 113.4)                   |
| Democratic People's Republic of Korea | Behavioral risks            | 1 (0.5 to 1.5)      | 31 (16.8 to 49.1)         | 1.2 (0.6 to 2)                     | 32.2 (17.3 to 50.8)                    | 1.1 (0.6 to 1.7)  | 35.2 (19.1 to 56.2)       | 1.5 (0.7 to 2.5)                   | 36.7 (19.9 to 58)                      |
| Democratic People's Republic of Korea | Alcohol use                 | 0.2 (0.1 to 0.3)    | 6.6 (4.1 to 10.4)         | 0.3 (0.1 to 0.4)                   | 6.9 (4.3 to 10.8)                      | 0.2 (0.1 to 0.3)  | 6.8 (4 to 10.3)           | 0.3 (0.2 to 0.5)                   | 7.1 (4.1 to 10.7)                      |
| Democratic People's Republic of Korea | Diet high in red meat       | 0.2 (0 to 0.3)      | 5.7 (1 to 9.6)            | 0.2 (0 to 0.4)                     | 5.9 (1.1 to 10)                        | 0.2 (0 to 0.3)    | 6.2 (1.1 to 10.7)         | 0.3 (0 to 0.5)                     | 6.5 (1.1 to 11.1)                      |
| Democratic People's Republic of Korea | Low physical activity       | 0.1 (0 to 0.2)      | 2 (1 to 4.3)              | 0.1 (0 to 0.2)                     | 2.1 (1.1 to 4.5)                       | 0.1 (0 to 0.2)    | 2.4 (1.2 to 4.9)          | 0.1 (0.1 to 0.2)                   | 2.5 (1.3 to 5.1)                       |
| Democratic People's Republic of Korea | Smoking                     | 0.1 (0 to 0.1)      | 2.3 (1.1 to 3.9)          | 0.1 (0 to 0.2)                     | 2.4 (1.2 to 4.1)                       | 0.1 (0.1 to 0.2)  | 4 (2.2 to 6.7)            | 0.2 (0.1 to 0.3)                   | 4.2 (2.3 to 7)                         |
| Democratic People's Republic of Korea | Secondhand smoke            | 0.5 (0.1 to 0.9)    | 15.4 (3.6 to 29.2)        | 0.6 (0.1 to 1.1)                   | 16 (3.7 to 30.1)                       | 0.5 (0.1 to 1)    | 16.9 (3.5 to 32.4)        | 0.7 (0.2 to 1.4)                   | 17.6 (3.7 to 33.5)                     |
| Democratic People's Republic of Korea | Metabolic risks             | 0.9 (0.2 to 1.9)    | 22.6 (5.6 to 50.9)        | 0.9 (0.2 to 2.1)                   | 23.5 (5.8 to 52.9)                     | 1.3 (0.4 to 2.6)  | 33.6 (9.1 to 69.6)        | 1.4 (0.4 to 3)                     | 35.1 (9.4 to 72.8)                     |
| Democratic People's Republic of Korea | High body-mass index        | 0.5 (0.1 to 1.3)    | 12.8 (1.8 to 35.1)        | 0.5 (0.1 to 1.4)                   | 13.3 (1.8 to 36.4)                     | 0.6 (0.1 to 1.6)  | 16.4 (2.4 to 43.4)        | 0.7 (0.1 to 1.9)                   | 17.1 (2.5 to 45.3)                     |
| Democratic People's Republic of Korea | High fasting plasma glucose | 0.4 (0.1 to 1)      | 10.3 (1.7 to 26.7)        | 0.4 (0.1 to 1.1)                   | 10.7 (1.8 to 27.8)                     | 0.7 (0.1 to 1.6)  | 18.3 (3.4 to 44.1)        | 0.8 (0.1 to 2)                     | 19.1 (3.6 to 45.8)                     |
| Democratic Republic of the Congo      | All risk factors            | 2.5 (1.6 to 3.7)    | 63.3 (39.9 to 93.6)       | 1.5 (0.9 to 2.3)                   | 64.8 (40.9 to 95.5)                    | 3.2 (1.7 to 5.5)  | 78.8 (43.4 to 132.7)      | 2.1 (1.1 to 3.6)                   | 80.9 (44.6 to 136.2)                   |
| Democratic Republic of the Congo      | Behavioral risks            | 1.5 (1.1 to 2)      | 44.2 (30.6 to 59.7)       | 1 (0.6 to 1.5)                     | 45.2 (31.4 to 60.9)                    | 1.7 (1 to 2.4)    | 46.5 (28.8 to 66.4)       | 1.2 (0.6 to 1.9)                   | 47.6 (29.4 to 68.2)                    |
| Democratic Republic of the Congo      | Alcohol use                 | 0.9 (0.6 to 1.3)    | 27.8 (17.8 to 39.6)       | 0.6 (0.4 to 0.9)                   | 28.4 (18.3 to 40.4)                    | 1 (0.5 to 1.5)    | 28 (15.7 to 42.1)         | 0.7 (0.3 to 1.2)                   | 28.7 (16.1 to 43.2)                    |
| Democratic Republic of the Congo      | Diet high in red meat       | 0.1 (0 to 0.2)      | 4.1 (1.2 to 6.4)          | 0.1 (0 to 0.1)                     | 4.2 (1.2 to 6.5)                       | 0.1 (0.1 to 0.2)  | 3.9 (1.4 to 6.4)          | 0.1 (0 to 0.2)                     | 4 (1.5 to 6.6)                         |
| Democratic Republic of the Congo      | Low physical activity       | 0.2 (0.1 to 0.4)    | 4.9 (2.3 to 9.1)          | 0.1 (0.1 to 0.2)                   | 5 (2.3 to 9.3)                         | 0.3 (0.1 to 0.5)  | 6.2 (2.9 to 11.7)         | 0.2 (0.1 to 0.4)                   | 6.4 (3 to 12)                          |
| Democratic Republic of the Congo      | Smoking                     | 0.1 (0.1 to 0.2)    | 2.7 (1.3 to 4.5)          | 0.1 (0 to 0.1)                     | 2.8 (1.3 to 4.6)                       | 0.1 (0 to 0.2)    | 2.5 (1.1 to 4.3)          | 0.1 (0 to 0.1)                     | 2.5 (1.2 to 4.4)                       |
| Democratic Republic of the Congo      | Secondhand smoke            | 0.2 (0 to 0.4)      | 6 (1.4 to 11.4)           | 0.1 (0 to 0.2)                     | 6.1 (1.4 to 11.7)                      | 0.2 (0.1 to 0.4)  | 7 (1.5 to 13.4)           | 0.2 (0 to 0.3)                     | 7.1 (1.6 to 13.6)                      |
| Democratic Republic of the Congo      | Metabolic risks             | 1.1 (0.3 to 2.2)    | 20.9 (3.3 to 47.3)        | 0.6 (0.1 to 1.2)                   | 21.4 (3.4 to 48.2)                     | 1.7 (0.4 to 3.8)  | 35 (6.7 to 82.4)          | 1 (0.2 to 2.3)                     | 35.9 (6.9 to 84.8)                     |
| Democratic Republic of the Congo      | High body-mass index        | 0.3 (0 to 0.7)      | 3.6 (-3.8 to 11.8)        | 0.1 (0 to 0.3)                     | 3.7 (-3.9 to 12.2)                     | 0.4 (0 to 0.9)    | 5 (-4 to 16.9)            | 0.2 (-0.1 to 0.5)                  | 5.1 (-4.1 to 17.4)                     |
| Democratic Republic of the Congo      | High fasting plasma glucose | 0.8 (0.2 to 1.9)    | 17.6 (3.4 to 41.8)        | 0.4 (0.1 to 1.1)                   | 18.1 (3.5 to 42.9)                     | 1.4 (0.3 to 3.3)  | 30.6 (5.5 to 75.2)        | 0.8 (0.1 to 2.1)                   | 31.5 (5.7 to 77)                       |
| Denmark                               | All risk factors            | 14.9 (12.8 to 17)   | 395.6 (340.7 to 447.7)    | 24.9 (17.1 to 34.4)                | 420.6 (361.9 to 475.2)                 | 8.4 (6.7 to 10.4) | 185.7 (150.9 to 226.6)    | 22.1 (14.1 to 33)                  | 207.8 (167 to 256)                     |
| Denmark                               | Behavioral risks            | 13.2 (11.4 to 14.9) | 362.9 (315.5 to 408.5)    | 22.9 (15.6 to 32)                  | 385.8 (334.9 to 434.1)                 | 6.5 (5.5 to 7.7)  | 153.4 (129.2 to 179.6)    | 18.4 (11.7 to 27.4)                | 171.8 (143.3 to 202)                   |
| Denmark                               | Alcohol use                 | 6.9 (5.7 to 8.2)    | 192 (158.1 to 226.4)      | 12.1 (8.1 to 17.1)                 | 204.1 (168.2 to 241.5)                 | 3.6 (2.8 to 4.4)  | 85.8 (68 to 104.9)        | 10.3 (6.4 to 15.4)                 | 96.1 (75.9 to 117.1)                   |
| Denmark                               | Diet high in red meat       | 2.2 (1.1 to 2.9)    | 61.1 (30.2 to 82.6)       | 3.8 (1.8 to 6.1)                   | 64.9 (32 to 87.8)                      | 1.2 (0.6 to 1.6)  | 28.3 (14.2 to 39.1)       | 3.4 (1.5 to 5.6)                   | 31.6 (15.7 to 44.3)                    |
| Denmark                               | Low physical activity       | 0.5 (0.2 to 1)      | 12 (4.4 to 24.6)          | 0.8 (0.3 to 1.8)                   | 12.8 (4.7 to 26.1)                     | 0.4 (0.1 to 0.7)  | 7.2 (2.5 to 14.2)         | 0.9 (0.3 to 1.9)                   | 8 (2.8 to 15.9)                        |
| Denmark                               | Smoking                     | 4.7 (3.4 to 5.9)    | 126 (91.7 to 160.5)       | 7.9 (4.7 to 11.6)                  | 133.9 (97.9 to 170.6)                  | 1.9 (1.4 to 2.4)  | 42.7 (31.3 to 55.3)       | 5.1 (3 to 8.1)                     | 47.8 (34.9 to 62.3)                    |
| Denmark                               | Secondhand smoke            | 0.7 (0.2 to 1.3)    | 22.6 (5.3 to 40)          | 1.4 (0.3 to 2.6)                   | 24 (5.6 to 42.7)                       | 0.2 (0.1 to 0.4)  | 6.9 (1.5 to 12.3)         | 0.8 (0.2 to 1.6)                   | 7.7 (1.7 to 13.9)                      |
| Denmark                               | Metabolic risks             | 2.6 (0.9 to 4.8)    | 50.9 (13.1 to 101.5)      | 3.2 (0.7 to 6.3)                   | 54.1 (14 to 107.1)                     | 2.6 (1 to 4.8)    | 46.3 (15.4 to 89.3)       | 5.4 (1.6 to 11.4)                  | 51.7 (16.9 to 99.1)                    |
| Denmark                               | High body-mass index        | 1.4 (0.3 to 2.9)    | 24.7 (-1 to 58.7)         | 1.4 (-0.1 to 3.4)                  | 26.1 (-1 to 62.2)                      | 1.2 (0.3 to 2.4)  | 19.3 (1.8 to 42.1)        | 2.2 (0.1 to 5.2)                   | 21.5 (1.8 to 46.4)                     |
| Denmark                               | High fasting plasma glucose | 1.2 (0.2 to 2.9)    | 27.4 (5 to 64.3)          | 1.8 (0.3 to 4.4)                   | 29.2 (5.3 to 68.2)                     | 1.5 (0.3 to 3.4)  | 28.7 (5.5 to 66.7)        | 3.4 (0.6 to 8.8)                   | 32.1 (6 to 74.4)                       |
| Djibouti                              | All risk factors            | 1.7 (0.9 to 2.8)    | 45.3 (24.4 to 71.6)       | 1.1 (0.6 to 1.9)                   | 46.4 (25 to 73.5)                      | 2.9 (1.6 to 4.7)  | 68.5 (36 to 111.5)        | 2.1 (1 to 3.6)                     | 70.6 (36.9 to 115)                     |

| Location           | Risk factor                 | 1990              |                           |                                    |                                        | 2019              |                           |                                    |                                        |
|--------------------|-----------------------------|-------------------|---------------------------|------------------------------------|----------------------------------------|-------------------|---------------------------|------------------------------------|----------------------------------------|
|                    |                             | Deaths            | YLLs (Years of Life Lost) | YLDs (Years Lived with Disability) | DALYs (Disability-Adjusted Life Years) | Deaths            | YLLs (Years of Life Lost) | YLDs (Years Lived with Disability) | DALYs (Disability-Adjusted Life Years) |
| Djibouti           | Behavioral risks            | 1.2 (0.7 to 1.8)  | 34 (19.1 to 51.7)         | 0.8 (0.4 to 1.3)                   | 34.8 (19.5 to 53.1)                    | 1.6 (0.9 to 2.4)  | 43.1 (22.8 to 68.1)       | 1.3 (0.6 to 2.1)                   | 44.4 (23.4 to 69.9)                    |
| Djibouti           | Alcohol use                 | 0.3 (0.2 to 0.5)  | 9 (4.7 to 14.5)           | 0.2 (0.1 to 0.4)                   | 9.2 (4.8 to 14.9)                      | 0.2 (0.1 to 0.3)  | 4.7 (1.8 to 8.6)          | 0.1 (0 to 0.3)                     | 4.8 (1.9 to 8.8)                       |
| Djibouti           | Diet high in red meat       | 0.3 (0.1 to 0.5)  | 8.6 (1.7 to 14.4)         | 0.2 (0 to 0.4)                     | 8.8 (1.8 to 14.7)                      | 0.5 (0.1 to 0.8)  | 13 (3.2 to 22.2)          | 0.4 (0.1 to 0.7)                   | 13.4 (3.3 to 22.8)                     |
| Djibouti           | Low physical activity       | 0.1 (0 to 0.2)    | 1.6 (0.8 to 3.7)          | 0 (0 to 0.1)                       | 1.6 (0.9 to 3.8)                       | 0.1 (0.1 to 0.2)  | 2.3 (1.3 to 5.4)          | 0.1 (0 to 0.2)                     | 2.4 (1.3 to 5.6)                       |
| Djibouti           | Smoking                     | 0.1 (0.1 to 0.2)  | 2.8 (1.2 to 5)            | 0.1 (0 to 0.1)                     | 2.9 (1.3 to 5.1)                       | 0.2 (0.1 to 0.4)  | 4.6 (2.2 to 7.8)          | 0.1 (0.1 to 0.3)                   | 4.7 (2.2 to 8)                         |
| Djibouti           | Secondhand smoke            | 0.4 (0.1 to 0.8)  | 13.1 (3 to 24.6)          | 0.3 (0.1 to 0.6)                   | 13.4 (3 to 25.1)                       | 0.7 (0.1 to 1.3)  | 19.8 (3.7 to 36.3)        | 0.6 (0.1 to 1.1)                   | 20.4 (3.8 to 37.3)                     |
| Djibouti           | Metabolic risks             | 0.6 (0.1 to 1.4)  | 12.3 (2.1 to 29.8)        | 0.3 (0.1 to 0.8)                   | 12.6 (2.2 to 30.6)                     | 1.4 (0.5 to 3)    | 27.6 (5.9 to 61.6)        | 0.9 (0.2 to 1.9)                   | 28.5 (6.2 to 63.6)                     |
| Djibouti           | High body-mass index        | 0.1 (0 to 0.3)    | 1.3 (-1.6 to 5.8)         | 0 (0 to 0.2)                       | 1.3 (-1.6 to 6)                        | 0.5 (0 to 1.1)    | 7.1 (-3.6 to 20.7)        | 0.3 (-0.1 to 0.7)                  | 7.4 (-3.6 to 21.4)                     |
| Djibouti           | High fasting plasma glucose | 0.5 (0.1 to 1.3)  | 11.1 (1.8 to 28)          | 0.3 (0 to 0.8)                     | 11.4 (1.9 to 28.8)                     | 1 (0.2 to 2.4)    | 21.2 (3.8 to 53)          | 0.7 (0.1 to 1.7)                   | 21.9 (3.9 to 54.4)                     |
| Dominica           | All risk factors            | 6 (3.9 to 9)      | 148.4 (95.5 to 219)       | 6.6 (3.8 to 10.2)                  | 155 (99.8 to 229.1)                    | 7.8 (4.5 to 12.6) | 175.7 (100.6 to 277.1)    | 8.6 (4.6 to 14.5)                  | 184.3 (105.9 to 291)                   |
| Dominica           | Behavioral risks            | 3.4 (2.6 to 4.3)  | 101.3 (76 to 129.8)       | 4.2 (2.7 to 6.1)                   | 105.5 (79.4 to 135.5)                  | 3.7 (2.7 to 4.9)  | 105.3 (75.1 to 142.1)     | 4.8 (3 to 7.1)                     | 110.1 (78.1 to 148.9)                  |
| Dominica           | Alcohol use                 | 1.5 (1.1 to 2)    | 51.3 (37.1 to 68.1)       | 2 (1.3 to 3.1)                     | 53.3 (38.6 to 70.7)                    | 1.6 (1.1 to 2.3)  | 53.3 (36.4 to 76.2)       | 2.4 (1.4 to 3.7)                   | 55.7 (38.1 to 79.2)                    |
| Dominica           | Diet high in red meat       | 0.6 (0.1 to 0.9)  | 19 (4.5 to 27.3)          | 0.8 (0.2 to 1.3)                   | 19.8 (4.7 to 28.4)                     | 0.8 (0.2 to 1.2)  | 22 (5.7 to 33.9)          | 1 (0.2 to 1.7)                     | 23 (5.9 to 35.6)                       |
| Dominica           | Low physical activity       | 0.4 (0.2 to 0.8)  | 9.7 (3.6 to 19.5)         | 0.4 (0.2 to 0.9)                   | 10.1 (3.8 to 20.5)                     | 0.6 (0.2 to 1.1)  | 12.5 (4 to 24.2)          | 0.6 (0.2 to 1.2)                   | 13.1 (4.2 to 25.5)                     |
| Dominica           | Smoking                     | 0.5 (0.3 to 0.8)  | 14 (8.3 to 21.5)          | 0.6 (0.3 to 1)                     | 14.7 (8.7 to 22.4)                     | 0.4 (0.3 to 0.7)  | 10.8 (6.4 to 16.3)        | 0.5 (0.3 to 0.8)                   | 11.3 (6.7 to 17.1)                     |
| Dominica           | Secondhand smoke            | 0.4 (0.1 to 0.7)  | 12.2 (2.9 to 21.8)        | 0.5 (0.1 to 1)                     | 12.7 (3 to 22.7)                       | 0.4 (0.1 to 0.7)  | 11.6 (2.7 to 21.5)        | 0.5 (0.1 to 1)                     | 12.1 (2.8 to 22.2)                     |
| Dominica           | Metabolic risks             | 3 (0.9 to 6.1)    | 53.1 (2.1 to 123.3)       | 2.7 (0.4 to 5.9)                   | 55.8 (2.8 to 129.1)                    | 4.7 (1.4 to 9.3)  | 79.3 (3.1 to 185.5)       | 4.3 (0.6 to 9.8)                   | 83.6 (3.9 to 193.5)                    |
| Dominica           | High body-mass index        | 0.9 (-0.1 to 2.1) | 5.3 (-20.7 to 30.6)       | 0.5 (-0.7 to 1.8)                  | 5.8 (-21.3 to 32.2)                    | 1.4 (-0.1 to 3.3) | 5.9 (-34.2 to 41.2)       | 0.7 (-1.1 to 2.5)                  | 6.6 (-35.7 to 43.2)                    |
| Dominica           | High fasting plasma glucose | 2.2 (0.4 to 5)    | 50.1 (9.8 to 113.4)       | 2.3 (0.4 to 5.4)                   | 52.4 (10.2 to 118.4)                   | 3.6 (0.8 to 8.1)  | 78.3 (15.9 to 180.1)      | 3.8 (0.8 to 9.3)                   | 82.1 (16.8 to 188.7)                   |
| Dominican Republic | All risk factors            | 1.9 (1.3 to 2.5)  | 48.7 (34.7 to 65.1)       | 1.7 (1.1 to 2.6)                   | 50.4 (35.7 to 67.4)                    | 3.3 (2.1 to 5.1)  | 81.9 (50 to 128.3)        | 4 (2.2 to 6.7)                     | 85.9 (52.3 to 135.1)                   |
| Dominican Republic | Behavioral risks            | 1.4 (1.1 to 1.7)  | 40.7 (31.5 to 50.8)       | 1.4 (0.9 to 1.9)                   | 42.1 (32.6 to 52.6)                    | 2.1 (1.4 to 2.9)  | 62.1 (41.1 to 86.9)       | 2.9 (1.7 to 4.4)                   | 65 (43.1 to 90.1)                      |
| Dominican Republic | Alcohol use                 | 0.5 (0.3 to 0.6)  | 17.5 (12.8 to 22.8)       | 0.5 (0.3 to 0.8)                   | 18 (13.2 to 23.5)                      | 0.7 (0.5 to 1.1)  | 27.3 (17.4 to 39.8)       | 1.2 (0.7 to 1.9)                   | 28.5 (18.2 to 41.3)                    |
| Dominican Republic | Diet high in red meat       | 0.2 (0 to 0.3)    | 5.9 (1.2 to 8.5)          | 0.2 (0 to 0.3)                     | 6.1 (1.2 to 8.7)                       | 0.4 (0.1 to 0.6)  | 11 (2.4 to 17.7)          | 0.5 (0.1 to 0.9)                   | 11.5 (2.5 to 18.5)                     |
| Dominican Republic | Low physical activity       | 0.1 (0.1 to 0.3)  | 2.7 (1.2 to 5.7)          | 0.1 (0 to 0.2)                     | 2.9 (1.3 to 6)                         | 0.2 (0.1 to 0.4)  | 4.9 (1.8 to 10.3)         | 0.2 (0.1 to 0.5)                   | 5.1 (1.9 to 10.7)                      |
| Dominican Republic | Smoking                     | 0.5 (0.3 to 0.7)  | 11.4 (7.3 to 16.3)        | 0.4 (0.2 to 0.7)                   | 11.9 (7.6 to 16.9)                     | 0.7 (0.5 to 1)    | 16.2 (10.2 to 24.9)       | 0.8 (0.5 to 1.3)                   | 17 (10.6 to 25.9)                      |
| Dominican Republic | Secondhand smoke            | 0.2 (0 to 0.3)    | 5 (1.2 to 9)              | 0.2 (0 to 0.3)                     | 5.2 (1.2 to 9.3)                       | 0.2 (0 to 0.4)    | 5.9 (1.2 to 11.7)         | 0.3 (0.1 to 0.5)                   | 6.2 (1.3 to 12.1)                      |
| Dominican Republic | Metabolic risks             | 0.6 (0.1 to 1.2)  | 9.1 (-2.2 to 23.6)        | 0.4 (0 to 1)                       | 9.5 (-2.1 to 24.6)                     | 1.3 (0.4 to 2.9)  | 22.8 (-3 to 58.8)         | 1.3 (0 to 3.1)                     | 24.1 (-3 to 61.5)                      |
| Dominican Republic | High body-mass index        | 0.2 (0 to 0.5)    | 0.5 (-6.9 to 7)           | 0.1 (-0.1 to 0.4)                  | 0.6 (-7 to 7.3)                        | 0.4 (-0.1 to 1.2) | 1.6 (-14.1 to 17.8)       | 0.2 (-0.5 to 1.1)                  | 1.9 (-14.5 to 18.6)                    |
| Dominican Republic | High fasting plasma glucose | 0.4 (0.1 to 0.9)  | 8.8 (1.6 to 21.1)         | 0.3 (0.1 to 0.8)                   | 9.1 (1.6 to 21.9)                      | 0.9 (0.2 to 2.3)  | 22.1 (4.1 to 54.9)        | 1.1 (0.2 to 2.8)                   | 23.2 (4.3 to 57.8)                     |
| Ecuador            | All risk factors            | 1.5 (0.9 to 2.3)  | 34.3 (18.4 to 52.2)       | 1.1 (0.6 to 1.9)                   | 35.4 (19.2 to 53.7)                    | 2.7 (1.5 to 4.2)  | 58.4 (30.1 to 96.2)       | 3.1 (1.5 to 5.3)                   | 61.5 (31.7 to 101.6)                   |
| Ecuador            | Behavioral risks            | 0.8 (0.6 to 1)    | 23.3 (16 to 29.6)         | 0.7 (0.4 to 1)                     | 24 (16.5 to 30.4)                      | 1.2 (0.8 to 1.6)  | 33.8 (22.6 to 46.8)       | 1.7 (1 to 2.6)                     | 35.5 (23.9 to 49.5)                    |
| Ecuador            | Alcohol use                 | 0.2 (0.1 to 0.2)  | 5.8 (4 to 7.9)            | 0.2 (0.1 to 0.2)                   | 5.9 (4.1 to 8.1)                       | 0.3 (0.2 to 0.5)  | 10.7 (7 to 15.5)          | 0.5 (0.3 to 0.8)                   | 11.2 (7.4 to 16.3)                     |
| Ecuador            | Diet high in red meat       | 0.2 (0.1 to 0.3)  | 7.1 (1.6 to 9.5)          | 0.2 (0 to 0.3)                     | 7.3 (1.7 to 9.7)                       | 0.4 (0.1 to 0.7)  | 12.7 (4.6 to 19.9)        | 0.6 (0.2 to 1.1)                   | 13.4 (4.8 to 20.9)                     |
| Ecuador            | Low physical activity       | 0 (0 to 0.1)      | 1.2 (0.8 to 3)            | 0 (0 to 0.1)                       | 1.2 (0.8 to 3.1)                       | 0.1 (0 to 0.1)    | 1.6 (0.9 to 3.8)          | 0.1 (0 to 0.2)                     | 1.7 (1 to 4)                           |
| Ecuador            | Smoking                     | 0.2 (0.1 to 0.3)  | 5.1 (2.9 to 7.7)          | 0.2 (0.1 to 0.3)                   | 5.2 (2.9 to 7.9)                       | 0.2 (0.1 to 0.3)  | 4.9 (2.5 to 7.5)          | 0.3 (0.1 to 0.4)                   | 5.2 (2.6 to 7.9)                       |
| Ecuador            | Secondhand smoke            | 0.2 (0 to 0.3)    | 4.9 (1.1 to 8.8)          | 0.1 (0 to 0.3)                     | 5.1 (1.1 to 9.1)                       | 0.2 (0 to 0.3)    | 5.1 (1.2 to 9.3)          | 0.2 (0.1 to 0.5)                   | 5.3 (1.2 to 9.8)                       |
| Ecuador            | Metabolic risks             | 0.8 (0.2 to 1.6)  | 11.9 (-3.1 to 30.3)       | 0.5 (0 to 1.1)                     | 12.4 (-3.1 to 31.3)                    | 1.6 (0.5 to 3.2)  | 26.7 (-1.1 to 61.3)       | 1.5 (0 to 3.5)                     | 28.2 (-1 to 64.8)                      |
| Ecuador            | High body-mass index        | 0.3 (-0.1 to 0.7) | 1.2 (-8.9 to 11.1)        | 0.1 (-0.2 to 0.5)                  | 1.4 (-9.1 to 11.5)                     | 0.6 (0 to 1.4)    | 4.7 (-13.5 to 22.1)       | 0.3 (-0.6 to 1.3)                  | 5 (-14.2 to 23.2)                      |
| Ecuador            | High fasting plasma glucose | 0.5 (0.1 to 1.2)  | 11.2 (2.1 to 25.5)        | 0.4 (0.1 to 0.9)                   | 11.6 (2.2 to 26.3)                     | 1.1 (0.2 to 2.5)  | 23.8 (4.7 to 55.1)        | 1.3 (0.2 to 3.2)                   | 25.1 (4.9 to 58.2)                     |
| Egypt              | All risk factors            | 1.3 (0.8 to 2)    | 31.6 (14.5 to 49.9)       | 1.2 (0.5 to 2)                     | 32.8 (15.1 to 51.9)                    | 2.9 (1.4 to 5.3)  | 67.6 (28.9 to 126.7)      | 3.2 (1.3 to 5.9)                   | 70.8 (30.5 to 132)                     |

| Location          | Risk factor                 | 1990              |                           |                                    |                                        | 2019              |                           |                                    |                                        |
|-------------------|-----------------------------|-------------------|---------------------------|------------------------------------|----------------------------------------|-------------------|---------------------------|------------------------------------|----------------------------------------|
|                   |                             | Deaths            | YLLs (Years of Life Lost) | YLDs (Years Lived with Disability) | DALYs (Disability-Adjusted Life Years) | Deaths            | YLLs (Years of Life Lost) | YLDs (Years Lived with Disability) | DALYs (Disability-Adjusted Life Years) |
| Egypt             | Behavioral risks            | 0.7 (0.4 to 1)    | 22.9 (13.1 to 33.2)       | 0.7 (0.4 to 1.1)                   | 23.6 (13.5 to 34.1)                    | 1.2 (0.6 to 1.8)  | 34.3 (17.1 to 55.3)       | 1.6 (0.7 to 2.7)                   | 35.8 (17.8 to 57.3)                    |
| Egypt             | Alcohol use                 | 0 (0 to 0)        | 0.7 (0.4 to 1.1)          | 0 (0 to 0)                         | 0.7 (0.4 to 1.2)                       | 0 (0 to 0.1)      | 1.1 (0.5 to 1.9)          | 0 (0 to 0.1)                       | 1.1 (0.5 to 1.9)                       |
| Egypt             | Diet high in red meat       | 0.2 (0 to 0.2)    | 5.3 (1 to 7.3)            | 0.2 (0 to 0.3)                     | 5.4 (1 to 7.6)                         | 0.3 (0.1 to 0.5)  | 9.2 (2 to 14.9)           | 0.4 (0.1 to 0.7)                   | 9.6 (2.1 to 15.5)                      |
| Egypt             | Low physical activity       | 0.2 (0.1 to 0.3)  | 4.5 (1.9 to 8.3)          | 0.2 (0.1 to 0.3)                   | 4.7 (1.9 to 8.6)                       | 0.3 (0.1 to 0.6)  | 7.5 (2.8 to 14.7)         | 0.4 (0.1 to 0.7)                   | 7.9 (2.9 to 15.4)                      |
| Egypt             | Smoking                     | 0 (0 to 0)        | 0.6 (0.4 to 0.9)          | 0 (0 to 0)                         | 0.6 (0.4 to 0.9)                       | 0 (0 to 0.1)      | 1 (0.5 to 1.7)            | 0 (0 to 0.1)                       | 1.1 (0.6 to 1.8)                       |
| Egypt             | Secondhand smoke            | 0.4 (0.1 to 0.6)  | 12.3 (3.1 to 21.6)        | 0.4 (0.1 to 0.7)                   | 12.7 (3.1 to 22.1)                     | 0.5 (0.1 to 1)    | 16.4 (3.5 to 32.5)        | 0.7 (0.2 to 1.4)                   | 17.2 (3.7 to 33.7)                     |
| Egypt             | Metabolic risks             | 0.6 (0.1 to 1.3)  | 9.5 (-4.8 to 26.9)        | 0.5 (0 to 1.1)                     | 10 (-4.8 to 27.9)                      | 1.9 (0.6 to 4.1)  | 36.3 (0.3 to 87.9)        | 1.8 (0.1 to 4.1)                   | 38.1 (0.4 to 92.8)                     |
| Egypt             | High body-mass index        | 0.3 (-0.1 to 0.7) | 0.4 (-11.5 to 11.6)       | 0.1 (-0.2 to 0.6)                  | 0.5 (-11.8 to 12)                      | 0.9 (0 to 2)      | 9.8 (-14.1 to 37)         | 0.5 (-0.6 to 1.8)                  | 10.2 (-14.9 to 38.7)                   |
| Egypt             | High fasting plasma glucose | 0.4 (0.1 to 0.9)  | 9.6 (1.8 to 22.8)         | 0.4 (0.1 to 0.9)                   | 10 (1.9 to 23.5)                       | 1.2 (0.2 to 3)    | 29.2 (5.6 to 74.3)        | 1.4 (0.3 to 3.6)                   | 30.6 (5.9 to 77.6)                     |
| El Salvador       | All risk factors            | 1 (0.6 to 1.6)    | 26.5 (15.4 to 41.5)       | 1 (0.5 to 1.6)                     | 27.4 (15.9 to 42.9)                    | 2 (1 to 3.5)      | 47.9 (23.7 to 87.8)       | 3 (1.4 to 5.5)                     | 50.9 (25.1 to 92.6)                    |
| El Salvador       | Behavioral risks            | 0.5 (0.4 to 0.7)  | 17.5 (13.3 to 22.4)       | 0.6 (0.4 to 0.8)                   | 18.1 (13.8 to 23.1)                    | 0.8 (0.5 to 1.1)  | 24.5 (15.7 to 35.2)       | 1.4 (0.8 to 2.2)                   | 25.9 (16.7 to 37.4)                    |
| El Salvador       | Alcohol use                 | 0.2 (0.2 to 0.3)  | 8 (5.7 to 10.8)           | 0.3 (0.2 to 0.4)                   | 8.2 (5.8 to 11.1)                      | 0.3 (0.2 to 0.5)  | 11.6 (7.4 to 17.1)        | 0.6 (0.4 to 1)                     | 12.3 (7.9 to 18.1)                     |
| El Salvador       | Diet high in red meat       | 0.1 (0 to 0.1)    | 2.6 (0.6 to 3.6)          | 0.1 (0 to 0.1)                     | 2.7 (0.6 to 3.8)                       | 0.1 (0 to 0.2)    | 4.3 (0.9 to 7.4)          | 0.2 (0 to 0.5)                     | 4.6 (0.9 to 7.8)                       |
| El Salvador       | Low physical activity       | 0 (0 to 0.1)      | 1.1 (0.6 to 2.4)          | 0 (0 to 0.1)                       | 1.1 (0.6 to 2.5)                       | 0.1 (0 to 0.1)    | 1.5 (0.8 to 3.1)          | 0.1 (0 to 0.2)                     | 1.6 (0.8 to 3.3)                       |
| El Salvador       | Smoking                     | 0.1 (0.1 to 0.2)  | 3.5 (2.2 to 5.2)          | 0.1 (0.1 to 0.2)                   | 3.7 (2.3 to 5.4)                       | 0.1 (0.1 to 0.2)  | 3.9 (2.3 to 6.2)          | 0.2 (0.1 to 0.4)                   | 4.1 (2.4 to 6.5)                       |
| El Salvador       | Secondhand smoke            | 0.1 (0 to 0.1)    | 2.8 (0.7 to 5)            | 0.1 (0 to 0.2)                     | 2.9 (0.7 to 5.2)                       | 0.1 (0 to 0.2)    | 3.8 (0.8 to 7.6)          | 0.2 (0 to 0.4)                     | 4 (0.9 to 8)                           |
| El Salvador       | Metabolic risks             | 0.5 (0.1 to 1.1)  | 9.6 (-1 to 23.4)          | 0.4 (0 to 1)                       | 10 (-1 to 24.2)                        | 1.3 (0.4 to 2.8)  | 25.2 (1.5 to 59.7)        | 1.7 (0.2 to 3.9)                   | 26.9 (1.7 to 64)                       |
| El Salvador       | High body-mass index        | 0.2 (0 to 0.4)    | 0.8 (-5.7 to 7)           | 0.1 (-0.1 to 0.3)                  | 0.9 (-5.7 to 7.2)                      | 0.4 (0 to 1)      | 3.3 (-9.3 to 15.8)        | 0.3 (-0.4 to 1.2)                  | 3.6 (-9.6 to 16.9)                     |
| El Salvador       | High fasting plasma glucose | 0.4 (0.1 to 0.9)  | 9 (1.7 to 21.2)           | 0.3 (0.1 to 0.8)                   | 9.4 (1.8 to 22)                        | 1 (0.2 to 2.3)    | 23.2 (4.4 to 57.8)        | 1.4 (0.3 to 3.7)                   | 24.6 (4.8 to 61.1)                     |
| Equatorial Guinea | All risk factors            | 2.1 (1.1 to 3.4)  | 56.5 (31.7 to 89.7)       | 1.2 (0.6 to 2.1)                   | 57.7 (32.3 to 91.5)                    | 6.5 (3.5 to 11.1) | 145.8 (77.1 to 252.8)     | 4.8 (2.5 to 8.6)                   | 150.6 (79.7 to 260.7)                  |
| Equatorial Guinea | Behavioral risks            | 1.4 (0.8 to 2.1)  | 42.1 (25.3 to 64.3)       | 0.9 (0.5 to 1.4)                   | 42.9 (26 to 65.8)                      | 3.8 (2.2 to 6.2)  | 99.6 (56 to 166.1)        | 3.2 (1.6 to 5.7)                   | 102.8 (58 to 172.4)                    |
| Equatorial Guinea | Alcohol use                 | 0.7 (0.4 to 1.1)  | 22.2 (12.4 to 34.3)       | 0.5 (0.2 to 0.8)                   | 22.7 (12.6 to 34.8)                    | 2.3 (1.3 to 3.9)  | 62.8 (33.2 to 107.2)      | 2 (1 to 3.6)                       | 64.8 (34.4 to 110)                     |
| Equatorial Guinea | Diet high in red meat       | 0.3 (0.1 to 0.4)  | 7.8 (1.5 to 13.9)         | 0.2 (0 to 0.3)                     | 7.9 (1.6 to 14.2)                      | 0.7 (0.2 to 1.3)  | 17.9 (4.6 to 34.4)        | 0.6 (0.1 to 1.1)                   | 18.5 (4.8 to 35.6)                     |
| Equatorial Guinea | Low physical activity       | 0.2 (0.1 to 0.3)  | 3.8 (1.6 to 7.3)          | 0.1 (0 to 0.2)                     | 3.9 (1.6 to 7.5)                       | 0.4 (0.2 to 0.9)  | 8.6 (3.1 to 18.2)         | 0.3 (0.1 to 0.6)                   | 8.9 (3.2 to 18.8)                      |
| Equatorial Guinea | Smoking                     | 0.1 (0 to 0.1)    | 1.6 (0.6 to 3.1)          | 0 (0 to 0.1)                       | 1.7 (0.7 to 3.1)                       | 0.1 (0.1 to 0.2)  | 2.8 (1.1 to 5.5)          | 0.1 (0 to 0.2)                     | 2.9 (1.1 to 5.8)                       |
| Equatorial Guinea | Secondhand smoke            | 0.3 (0.1 to 0.5)  | 8.2 (1.9 to 15.7)         | 0.2 (0 to 0.3)                     | 8.3 (2 to 16)                          | 0.4 (0.1 to 0.9)  | 12.3 (2.5 to 25.5)        | 0.4 (0.1 to 0.8)                   | 12.6 (2.6 to 26.3)                     |
| Equatorial Guinea | Metabolic risks             | 0.7 (0.2 to 1.7)  | 16 (2.4 to 39.7)          | 0.4 (0.1 to 1)                     | 16.4 (2.4 to 40.8)                     | 3.1 (1 to 6.8)    | 53.7 (10.5 to 127.2)      | 1.9 (0.4 to 4.5)                   | 55.6 (11 to 131.4)                     |
| Equatorial Guinea | High body-mass index        | 0.1 (0 to 0.4)    | 1.4 (-2.6 to 6.1)         | 0.1 (0 to 0.2)                     | 1.4 (-2.6 to 6.2)                      | 1.3 (0.2 to 3)    | 16.2 (-10.1 to 48.7)      | 0.6 (-0.2 to 1.7)                  | 16.9 (-10.4 to 50.3)                   |
| Equatorial Guinea | High fasting plasma glucose | 0.6 (0.1 to 1.6)  | 14.8 (2.4 to 37.8)        | 0.3 (0.1 to 0.9)                   | 15.2 (2.5 to 38.7)                     | 1.9 (0.4 to 5)    | 39.9 (7.1 to 104.4)       | 1.3 (0.2 to 3.7)                   | 41.2 (7.3 to 107.5)                    |
| Eritrea           | All risk factors            | 1.3 (0.6 to 2.4)  | 35.7 (16.5 to 63.5)       | 0.8 (0.3 to 1.5)                   | 36.5 (16.9 to 64.9)                    | 2.7 (1.5 to 4.6)  | 67.6 (37.4 to 114.4)      | 1.7 (0.9 to 3.1)                   | 69.4 (38.3 to 117.3)                   |
| Eritrea           | Behavioral risks            | 0.7 (0.4 to 1.1)  | 22.6 (11.5 to 36.3)       | 0.5 (0.2 to 0.8)                   | 23.1 (11.8 to 36.9)                    | 1.2 (0.7 to 1.7)  | 34.6 (20.8 to 52)         | 0.8 (0.5 to 1.3)                   | 35.4 (21.3 to 53.1)                    |
| Eritrea           | Alcohol use                 | 0.3 (0.1 to 0.5)  | 10 (4.6 to 17)            | 0.2 (0.1 to 0.4)                   | 10.2 (4.7 to 17.4)                     | 0.5 (0.3 to 0.8)  | 15.4 (8.2 to 25.2)        | 0.4 (0.2 to 0.7)                   | 15.8 (8.4 to 26)                       |
| Eritrea           | Diet high in red meat       | 0.2 (0 to 0.3)    | 5.5 (1 to 10.4)           | 0.1 (0 to 0.2)                     | 5.7 (1 to 10.6)                        | 0.3 (0.1 to 0.5)  | 8.8 (1.7 to 15.2)         | 0.2 (0 to 0.4)                     | 9 (1.8 to 15.5)                        |
| Eritrea           | Low physical activity       | 0.1 (0 to 0.1)    | 1.7 (0.9 to 3.9)          | 0 (0 to 0.1)                       | 1.8 (0.9 to 4)                         | 0.1 (0.1 to 0.2)  | 2.7 (1.6 to 5.8)          | 0.1 (0 to 0.2)                     | 2.8 (1.6 to 5.9)                       |
| Eritrea           | Smoking                     | 0 (0 to 0)        | 0.5 (0.2 to 0.9)          | 0 (0 to 0)                         | 0.5 (0.2 to 1)                         | 0 (0 to 0)        | 0.6 (0.2 to 1.1)          | 0 (0 to 0)                         | 0.6 (0.2 to 1.1)                       |
| Eritrea           | Secondhand smoke            | 0.2 (0 to 0.3)    | 5.3 (1 to 10.9)           | 0.1 (0 to 0.2)                     | 5.4 (1 to 11.1)                        | 0.2 (0.1 to 0.5)  | 7.7 (1.7 to 14.9)         | 0.2 (0 to 0.4)                     | 7.9 (1.7 to 15.3)                      |
| Eritrea           | Metabolic risks             | 0.6 (0.1 to 1.5)  | 13.8 (2.5 to 34.7)        | 0.3 (0.1 to 0.8)                   | 14.1 (2.5 to 35.5)                     | 1.6 (0.5 to 3.3)  | 34.9 (10.1 to 74.5)       | 1 (0.3 to 2.1)                     | 35.8 (10.4 to 76.6)                    |
| Eritrea           | High body-mass index        | 0.1 (0 to 0.3)    | 2.1 (-0.7 to 6.9)         | 0.1 (0 to 0.2)                     | 2.2 (-0.7 to 7.1)                      | 0.6 (0.1 to 1.2)  | 10.7 (-0.2 to 25.7)       | 0.3 (0 to 0.7)                     | 11 (-0.1 to 26.2)                      |
| Eritrea           | High fasting plasma glucose | 0.5 (0.1 to 1.3)  | 11.8 (1.8 to 32.1)        | 0.3 (0 to 0.7)                     | 12.1 (1.8 to 32.9)                     | 1.1 (0.2 to 2.6)  | 25 (4.4 to 60.7)          | 0.7 (0.1 to 1.7)                   | 25.6 (4.5 to 62.1)                     |
| Estonia           | All risk factors            | 5.6 (4.3 to 7)    | 159.4 (122 to 194.1)      | 9 (5.8 to 12.5)                    | 168.4 (129.1 to 204.6)                 | 5.5 (3.9 to 7.6)  | 140.7 (99.2 to 193.3)     | 14.1 (8.8 to 21.5)                 | 154.7 (109.5 to 211.4)                 |

| Location | Risk factor                 | 1990              |                           |                                    |                                        | 2019               |                           |                                    |                                        |
|----------|-----------------------------|-------------------|---------------------------|------------------------------------|----------------------------------------|--------------------|---------------------------|------------------------------------|----------------------------------------|
|          |                             | Deaths            | YLLs (Years of Life Lost) | YLDs (Years Lived with Disability) | DALYs (Disability-Adjusted Life Years) | Deaths             | YLLs (Years of Life Lost) | YLDs (Years Lived with Disability) | DALYs (Disability-Adjusted Life Years) |
| Estonia  | Behavioral risks            | 4.3 (3.5 to 5.1)  | 134.7 (110.5 to 159.2)    | 7.4 (4.9 to 10.3)                  | 142.1 (115.8 to 167.8)                 | 3.8 (2.8 to 5.1)   | 109 (78.8 to 145.8)       | 10.8 (6.7 to 16.3)                 | 119.9 (87.3 to 160.9)                  |
| Estonia  | Alcohol use                 | 2 (1.5 to 2.5)    | 65 (50.3 to 80.8)         | 3.5 (2.3 to 5.1)                   | 68.5 (52.3 to 85.2)                    | 2.1 (1.4 to 2.8)   | 61.1 (41.7 to 84.2)       | 6.1 (3.6 to 9.2)                   | 67.2 (46 to 92.3)                      |
| Estonia  | Diet high in red meat       | 0.8 (0.3 to 1.1)  | 26 (10.3 to 34.6)         | 1.4 (0.6 to 2.2)                   | 27.5 (10.9 to 36.5)                    | 0.6 (0.2 to 1)     | 17.9 (6.5 to 27.6)        | 1.8 (0.6 to 3.1)                   | 19.7 (7.1 to 30.5)                     |
| Estonia  | Low physical activity       | 0.2 (0.1 to 0.3)  | 3.7 (2.3 to 6.9)          | 0.2 (0.1 to 0.4)                   | 3.9 (2.5 to 7.3)                       | 0.2 (0.1 to 0.3)   | 3.3 (1.9 to 6.1)          | 0.3 (0.2 to 0.7)                   | 3.6 (2.1 to 6.7)                       |
| Estonia  | Smoking                     | 1.1 (0.7 to 1.6)  | 34.7 (22 to 48.8)         | 1.9 (1 to 3)                       | 36.6 (23.3 to 51.3)                    | 1 (0.6 to 1.4)     | 27.3 (16.6 to 41.1)       | 2.7 (1.4 to 4.4)                   | 30 (18.3 to 45)                        |
| Estonia  | Secondhand smoke            | 0.5 (0.1 to 0.9)  | 16.8 (4 to 28.8)          | 0.9 (0.2 to 1.7)                   | 17.7 (4.2 to 30.4)                     | 0.3 (0.1 to 0.6)   | 9.3 (2.1 to 17)           | 0.9 (0.2 to 1.8)                   | 10.2 (2.3 to 18.7)                     |
| Estonia  | Metabolic risks             | 1.6 (0.5 to 3.1)  | 30.6 (1.1 to 65.5)        | 1.9 (0.2 to 4.1)                   | 32.5 (1.6 to 69.3)                     | 2.1 (0.8 to 4)     | 40.9 (11.5 to 82.3)       | 4.1 (1.1 to 8.4)                   | 45 (12.9 to 91.5)                      |
| Estonia  | High body-mass index        | 0.9 (0.1 to 2)    | 12.6 (-10.4 to 37.5)      | 0.8 (-0.5 to 2.3)                  | 13.4 (-10.7 to 40)                     | 1.3 (0.3 to 2.5)   | 21.5 (-1 to 48.1)         | 2.1 (-0.1 to 5.1)                  | 23.6 (-1 to 52.9)                      |
| Estonia  | High fasting plasma glucose | 0.8 (0.1 to 1.8)  | 19 (3.3 to 44.4)          | 1.1 (0.2 to 2.8)                   | 20.1 (3.5 to 46.6)                     | 0.9 (0.2 to 2.2)   | 21.2 (3.7 to 50.5)        | 2.2 (0.4 to 5.6)                   | 23.3 (4.1 to 56)                       |
| Eswatini | All risk factors            | 3.6 (2.1 to 5.5)  | 80.8 (47.1 to 124.4)      | 2.3 (1.3 to 3.6)                   | 83.1 (48.6 to 127.2)                   | 5.6 (3 to 9.3)     | 117.5 (59.2 to 197.9)     | 3.7 (1.8 to 6.3)                   | 121.2 (61.5 to 203.6)                  |
| Eswatini | Behavioral risks            | 2 (1.3 to 2.7)    | 52.3 (33.8 to 73.2)       | 1.4 (0.8 to 2.1)                   | 53.7 (34.7 to 75.3)                    | 2.5 (1.5 to 3.8)   | 62.7 (35.5 to 100.7)      | 1.8 (1 to 3)                       | 64.6 (36.4 to 103.5)                   |
| Eswatini | Alcohol use                 | 0.8 (0.5 to 1.2)  | 21.6 (13.9 to 31.4)       | 0.6 (0.3 to 0.9)                   | 22.2 (14.3 to 32.1)                    | 1 (0.6 to 1.7)     | 27.2 (14.9 to 45.9)       | 0.8 (0.4 to 1.3)                   | 28 (15.4 to 47.2)                      |
| Eswatini | Diet high in red meat       | 0.6 (0.2 to 0.9)  | 15.8 (5 to 24.6)          | 0.4 (0.1 to 0.7)                   | 16.2 (5.1 to 25.2)                     | 0.7 (0.2 to 1.1)   | 18.1 (5.4 to 32.4)        | 0.5 (0.1 to 1)                     | 18.6 (5.6 to 33.2)                     |
| Eswatini | Low physical activity       | 0.1 (0.1 to 0.3)  | 3.2 (1.6 to 6)            | 0.1 (0 to 0.2)                     | 3.3 (1.7 to 6.2)                       | 0.2 (0.1 to 0.5)   | 5 (2.2 to 10.2)           | 0.2 (0.1 to 0.3)                   | 5.1 (2.3 to 10.5)                      |
| Eswatini | Smoking                     | 0.3 (0.2 to 0.4)  | 4.5 (2.5 to 7.1)          | 0.1 (0.1 to 0.2)                   | 4.7 (2.6 to 7.3)                       | 0.3 (0.2 to 0.5)   | 4.5 (2.3 to 7.5)          | 0.1 (0.1 to 0.3)                   | 4.6 (2.4 to 7.7)                       |
| Eswatini | Secondhand smoke            | 0.3 (0.1 to 0.6)  | 9.4 (2 to 18.1)           | 0.2 (0.1 to 0.5)                   | 9.7 (2.1 to 18.5)                      | 0.4 (0.1 to 0.7)   | 10.4 (2.2 to 20.8)        | 0.3 (0.1 to 0.6)                   | 10.7 (2.2 to 21.4)                     |
| Eswatini | Metabolic risks             | 1.9 (0.6 to 3.5)  | 32.9 (4.5 to 68)          | 1 (0.2 to 2.2)                     | 33.9 (4.7 to 70.4)                     | 3.5 (1.3 to 6.9)   | 62 (14.9 to 133.5)        | 2.1 (0.5 to 4.4)                   | 64 (15.5 to 137.7)                     |
| Eswatini | High body-mass index        | 0.9 (0.2 to 1.9)  | 12.7 (-6 to 32.9)         | 0.5 (0 to 1.1)                     | 13.2 (-5.9 to 34)                      | 1.6 (0.4 to 3.3)   | 21.3 (-9.3 to 54.8)       | 0.8 (-0.1 to 1.9)                  | 22 (-9.3 to 56.7)                      |
| Eswatini | High fasting plasma glucose | 1 (0.2 to 2.4)    | 21.7 (3.8 to 50.9)        | 0.6 (0.1 to 1.6)                   | 22.4 (3.9 to 52.2)                     | 2.1 (0.4 to 5.2)   | 44.8 (8.2 to 113.2)       | 1.4 (0.2 to 3.6)                   | 46.2 (8.5 to 115.8)                    |
| Ethiopia | All risk factors            | 1.9 (1 to 3.2)    | 52.8 (29.6 to 84)         | 1.1 (0.6 to 2)                     | 53.9 (30.4 to 85.7)                    | 2.1 (1.2 to 3.3)   | 50.4 (29.9 to 77)         | 1.5 (0.8 to 2.3)                   | 51.9 (30.9 to 78.8)                    |
| Ethiopia | Behavioral risks            | 1.2 (0.7 to 1.7)  | 37 (22.2 to 54.5)         | 0.8 (0.4 to 1.2)                   | 37.8 (22.6 to 55.8)                    | 1.2 (0.8 to 1.7)   | 34.1 (22.7 to 48.4)       | 1 (0.6 to 1.5)                     | 35.1 (23.4 to 49.6)                    |
| Ethiopia | Alcohol use                 | 0.7 (0.4 to 1.1)  | 22.6 (12.5 to 35.2)       | 0.5 (0.2 to 0.8)                   | 23.1 (12.7 to 35.9)                    | 0.8 (0.5 to 1.1)   | 22.1 (13.4 to 33.3)       | 0.6 (0.3 to 1)                     | 22.7 (13.8 to 34.2)                    |
| Ethiopia | Diet high in red meat       | 0.2 (0 to 0.3)    | 6.5 (1.3 to 10.2)         | 0.1 (0 to 0.2)                     | 6.6 (1.3 to 10.4)                      | 0.2 (0 to 0.3)     | 6 (1.2 to 9.4)            | 0.2 (0 to 0.3)                     | 6.2 (1.3 to 9.6)                       |
| Ethiopia | Low physical activity       | 0.1 (0 to 0.2)    | 2.2 (1.3 to 4.9)          | 0 (0 to 0.1)                       | 2.2 (1.3 to 5)                         | 0.1 (0.1 to 0.2)   | 1.9 (1.2 to 4.2)          | 0.1 (0 to 0.1)                     | 1.9 (1.2 to 4.3)                       |
| Ethiopia | Smoking                     | 0 (0 to 0.1)      | 0.9 (0.4 to 1.7)          | 0 (0 to 0)                         | 0.9 (0.4 to 1.8)                       | 0 (0 to 0)         | 0.7 (0.3 to 1.2)          | 0 (0 to 0)                         | 0.7 (0.3 to 1.3)                       |
| Ethiopia | Secondhand smoke            | 0.2 (0 to 0.3)    | 5.7 (1.2 to 11.1)         | 0.1 (0 to 0.2)                     | 5.8 (1.2 to 11.3)                      | 0.1 (0 to 0.2)     | 4.2 (1 to 7.7)            | 0.1 (0 to 0.2)                     | 4.3 (1 to 7.8)                         |
| Ethiopia | Metabolic risks             | 0.8 (0.2 to 1.8)  | 16.8 (1.5 to 41.8)        | 0.4 (0.1 to 1)                     | 17.2 (1.5 to 42.6)                     | 1 (0.3 to 2.1)     | 17.4 (2.5 to 40.6)        | 0.6 (0.1 to 1.2)                   | 18 (2.6 to 42.2)                       |
| Ethiopia | High body-mass index        | 0.1 (0 to 0.3)    | 0.2 (-4.2 to 5)           | 0 (0 to 0.1)                       | 0.2 (-4.2 to 5.1)                      | 0.3 (0 to 0.7)     | 2.7 (-4.2 to 11)          | 0.1 (-0.1 to 0.4)                  | 2.8 (-4.3 to 11.4)                     |
| Ethiopia | High fasting plasma glucose | 0.7 (0.1 to 1.7)  | 16.7 (2.8 to 41.4)        | 0.4 (0.1 to 1)                     | 17.1 (2.9 to 42.4)                     | 0.7 (0.1 to 1.7)   | 15 (2.7 to 36.6)          | 0.5 (0.1 to 1.1)                   | 15.5 (2.7 to 37.7)                     |
| Fiji     | All risk factors            | 11.5 (6.5 to 17)  | 306 (178.5 to 452.3)      | 9.1 (5 to 14.3)                    | 315.2 (183.7 to 464.8)                 | 16.4 (8.9 to 24.9) | 410.2 (224.2 to 626.3)    | 13.9 (7.3 to 22.1)                 | 424.1 (231.6 to 643.7)                 |
| Fiji     | Behavioral risks            | 3.9 (2.5 to 5.4)  | 114.3 (73.5 to 163)       | 3.3 (1.9 to 5.2)                   | 117.7 (75.6 to 167.5)                  | 4.1 (2.6 to 5.9)   | 115 (72.4 to 166.5)       | 3.8 (2.2 to 6)                     | 118.8 (74.8 to 171.8)                  |
| Fiji     | Alcohol use                 | 0.2 (0.1 to 0.3)  | 6.6 (4.3 to 9.3)          | 0.2 (0.1 to 0.3)                   | 6.8 (4.4 to 9.5)                       | 0.3 (0.2 to 0.4)   | 10 (6.2 to 15.4)          | 0.3 (0.2 to 0.5)                   | 10.3 (6.4 to 15.8)                     |
| Fiji     | Diet high in red meat       | 1.2 (0.5 to 1.7)  | 36.1 (14 to 54.3)         | 1 (0.4 to 1.7)                     | 37.1 (14.3 to 55.7)                    | 1.3 (0.5 to 1.9)   | 37.1 (13.4 to 58.5)       | 1.2 (0.4 to 2.1)                   | 38.3 (13.9 to 60.2)                    |
| Fiji     | Low physical activity       | 0.5 (0.2 to 0.9)  | 11 (4 to 22)              | 0.3 (0.1 to 0.7)                   | 11.3 (4.1 to 22.7)                     | 0.7 (0.3 to 1.2)   | 15.4 (5.5 to 30.1)        | 0.5 (0.2 to 1.1)                   | 15.9 (5.8 to 31.6)                     |
| Fiji     | Smoking                     | 1.2 (0.6 to 1.8)  | 32.7 (16.3 to 52.5)       | 1 (0.5 to 1.6)                     | 33.7 (16.8 to 53.9)                    | 0.8 (0.4 to 1.3)   | 21.5 (11.1 to 34.8)       | 0.7 (0.3 to 1.3)                   | 22.2 (11.4 to 35.9)                    |
| Fiji     | Secondhand smoke            | 1.1 (0.3 to 2)    | 33.9 (7.8 to 61.3)        | 1 (0.2 to 1.9)                     | 34.9 (8 to 62.9)                       | 1.2 (0.3 to 2.3)   | 36.2 (8.5 to 68.3)        | 1.2 (0.3 to 2.3)                   | 37.4 (8.8 to 70)                       |
| Fiji     | Metabolic risks             | 8.8 (3.8 to 14.5) | 221.6 (95.9 to 372.4)     | 6.7 (2.8 to 11.6)                  | 228.3 (99.1 to 383)                    | 13.8 (6.2 to 22.8) | 333 (150.3 to 550.3)      | 11.3 (5.1 to 19.1)                 | 344.3 (155.4 to 568.5)                 |
| Fiji     | High body-mass index        | 6.3 (2 to 11.4)   | 157.9 (50.1 to 287.5)     | 4.8 (1.5 to 8.8)                   | 162.7 (51.7 to 295.8)                  | 9.4 (3 to 16.8)    | 220.3 (72.9 to 396.5)     | 7.5 (2.6 to 13.8)                  | 227.8 (75.1 to 408.8)                  |
| Fiji     | High fasting plasma glucose | 3.3 (0.7 to 7.4)  | 83 (16.9 to 189.7)        | 2.5 (0.5 to 6)                     | 85.6 (17.3 to 195.1)                   | 6.3 (1.4 to 13.9)  | 154.7 (33.6 to 348.4)     | 5.3 (1.1 to 12.3)                  | 160 (34.7 to 359)                      |

| Location | Risk factor                 | 1990             |                           |                                    |                                        | 2019              |                           |                                    |                                        |
|----------|-----------------------------|------------------|---------------------------|------------------------------------|----------------------------------------|-------------------|---------------------------|------------------------------------|----------------------------------------|
|          |                             | Deaths           | YLLs (Years of Life Lost) | YLDs (Years Lived with Disability) | DALYs (Disability-Adjusted Life Years) | Deaths            | YLLs (Years of Life Lost) | YLDs (Years Lived with Disability) | DALYs (Disability-Adjusted Life Years) |
| Finland  | All risk factors            | 6.6 (5.2 to 8.2) | 180.4 (144.7 to 217.7)    | 16.3 (10.5 to 22.9)                | 196.7 (157.2 to 237.6)                 | 5.4 (4 to 7.2)    | 128 (96.9 to 164.9)       | 21 (13 to 32.6)                    | 149 (112.7 to 194.3)                   |
| Finland  | Behavioral risks            | 5.1 (4.3 to 5.8) | 151.1 (129.5 to 173.6)    | 13.3 (8.9 to 18.7)                 | 164.4 (140.2 to 189.9)                 | 3.6 (2.9 to 4.2)  | 94.6 (78.7 to 111.4)      | 15.3 (9.5 to 22.7)                 | 109.9 (90.5 to 131.1)                  |
| Finland  | Alcohol use                 | 2.5 (2 to 3)     | 75.9 (61.4 to 90.7)       | 6.6 (4.3 to 9.7)                   | 82.5 (66.2 to 98.5)                    | 1.8 (1.4 to 2.3)  | 50.6 (39.1 to 63.2)       | 8.1 (5 to 12.4)                    | 58.7 (44.9 to 74.4)                    |
| Finland  | Diet high in red meat       | 1.1 (0.6 to 1.5) | 31.4 (15.7 to 42.4)       | 2.8 (1.3 to 4.4)                   | 34.2 (17 to 46.4)                      | 0.8 (0.4 to 1.1)  | 19.9 (9.8 to 27.5)        | 3.2 (1.4 to 5.4)                   | 23.2 (11.3 to 32.3)                    |
| Finland  | Low physical activity       | 0.3 (0.1 to 0.5) | 6.1 (2.3 to 12.5)         | 0.6 (0.2 to 1.3)                   | 6.6 (2.5 to 13.7)                      | 0.2 (0.1 to 0.5)  | 5 (1.7 to 9.9)            | 0.8 (0.3 to 1.8)                   | 5.8 (2 to 11.5)                        |
| Finland  | Smoking                     | 1.4 (1 to 1.9)   | 43.2 (30.3 to 58.3)       | 3.8 (2.2 to 5.8)                   | 47 (32.8 to 63.8)                      | 0.9 (0.6 to 1.1)  | 22.7 (16.1 to 29.9)       | 3.7 (2 to 6)                       | 26.4 (18.5 to 35.2)                    |
| Finland  | Secondhand smoke            | 0.3 (0.1 to 0.6) | 10.5 (2.5 to 18.5)        | 0.9 (0.2 to 1.7)                   | 11.4 (2.6 to 20.2)                     | 0.2 (0 to 0.3)    | 5.1 (1.2 to 9)            | 0.8 (0.2 to 1.6)                   | 5.9 (1.4 to 10.4)                      |
| Finland  | Metabolic risks             | 2 (0.7 to 3.9)   | 38.5 (8.5 to 79.5)        | 3.9 (1 to 8)                       | 42.4 (9.7 to 86.8)                     | 2.3 (0.9 to 4.4)  | 43.3 (13.4 to 86.5)       | 7.4 (2.2 to 15.3)                  | 50.7 (15.6 to 101.6)                   |
| Finland  | High body-mass index        | 0.8 (0.1 to 1.7) | 11.5 (-4.5 to 31)         | 1.2 (-0.3 to 3.1)                  | 12.7 (-4.6 to 33.5)                    | 0.9 (0.2 to 1.7)  | 13.6 (-0.1 to 31.3)       | 2.4 (0.2 to 5.8)                   | 16.1 (0.1 to 36.1)                     |
| Finland  | High fasting plasma glucose | 1.3 (0.3 to 2.9) | 28.4 (5.3 to 64.3)        | 2.8 (0.5 to 6.7)                   | 31.1 (5.8 to 70.6)                     | 1.5 (0.3 to 3.5)  | 31.6 (6.2 to 70.8)        | 5.3 (1 to 13.2)                    | 36.9 (7.4 to 83.9)                     |
| France   | All risk factors            | 9 (7.5 to 10.5)  | 237.6 (200.4 to 273)      | 18.3 (12.2 to 25.5)                | 255.9 (217 to 294.7)                   | 6.7 (5.4 to 8.2)  | 162.7 (131.3 to 195)      | 21.9 (13.6 to 33.3)                | 184.6 (148.6 to 223.3)                 |
| France   | Behavioral risks            | 7.8 (6.6 to 8.9) | 215.8 (185 to 246.8)      | 16.5 (11.1 to 23)                  | 232.2 (198.4 to 265.9)                 | 5.4 (4.5 to 6.3)  | 140.8 (118.9 to 165.5)    | 18.8 (11.5 to 28.5)                | 159.6 (132.4 to 189.6)                 |
| France   | Alcohol use                 | 4.4 (3.6 to 5.3) | 123.1 (100.7 to 147.5)    | 9.4 (6.1 to 13.4)                  | 132.4 (108.3 to 158.9)                 | 2.9 (2.3 to 3.6)  | 77.5 (62.1 to 95.2)       | 10.4 (6.2 to 16.2)                 | 87.9 (69.6 to 108.9)                   |
| France   | Diet high in red meat       | 1.7 (0.8 to 2.3) | 45.4 (22.3 to 64)         | 3.5 (1.6 to 5.7)                   | 48.9 (23.9 to 69)                      | 1.1 (0.6 to 1.6)  | 29.3 (14.4 to 41.4)       | 3.9 (1.7 to 6.6)                   | 33.2 (16.1 to 46.7)                    |
| France   | Low physical activity       | 0.5 (0.2 to 1)   | 12.2 (3.8 to 23.2)        | 1 (0.3 to 2)                       | 13.2 (4.1 to 25)                       | 0.4 (0.1 to 0.8)  | 9.3 (3 to 16.9)           | 1.3 (0.4 to 2.6)                   | 10.5 (3.3 to 19.4)                     |
| France   | Smoking                     | 1.5 (1.1 to 2)   | 43.2 (29.5 to 57.9)       | 3.3 (1.9 to 5)                     | 46.5 (32.1 to 62.4)                    | 1.2 (0.8 to 1.6)  | 33 (22.1 to 44.6)         | 4.4 (2.4 to 7.2)                   | 37.4 (25 to 50.3)                      |
| France   | Secondhand smoke            | 0.5 (0.1 to 0.9) | 17.2 (4.3 to 29.6)        | 1.3 (0.3 to 2.3)                   | 18.5 (4.5 to 32)                       | 0.2 (0.1 to 0.4)  | 7.6 (1.9 to 13.2)         | 1 (0.2 to 1.9)                     | 8.6 (2.1 to 15.1)                      |
| France   | Metabolic risks             | 1.7 (0.6 to 3.1) | 30.4 (7.1 to 59.4)        | 2.6 (0.6 to 5.3)                   | 33 (7.7 to 64.5)                       | 1.8 (0.7 to 3.3)  | 30.6 (7.3 to 61.2)        | 4.3 (1 to 8.9)                     | 34.9 (8.3 to 69.3)                     |
| France   | High body-mass index        | 1 (0.2 to 2)     | 15.7 (-2 to 36.4)         | 1.4 (-0.1 to 3.2)                  | 17.1 (-2 to 39.1)                      | 1 (0.2 to 2)      | 13.8 (-3 to 33.6)         | 1.9 (-0.2 to 5)                    | 15.7 (-3.1 to 38.1)                    |
| France   | High fasting plasma glucose | 0.8 (0.1 to 1.8) | 15.4 (2.8 to 35.7)        | 1.3 (0.2 to 3.2)                   | 16.7 (3.1 to 39.1)                     | 0.9 (0.2 to 2.1)  | 17.9 (3.4 to 42.1)        | 2.5 (0.4 to 6.5)                   | 20.4 (3.9 to 48)                       |
| Gabon    | All risk factors            | 5.5 (3.7 to 7.7) | 143.3 (96.8 to 196.8)     | 3.6 (2.2 to 5.4)                   | 146.9 (99.7 to 201.5)                  | 7.4 (4.2 to 11.6) | 170.8 (98.9 to 266.6)     | 5.6 (3.1 to 9.3)                   | 176.4 (102.2 to 274.1)                 |
| Gabon    | Behavioral risks            | 4.2 (2.9 to 5.7) | 119 (81.5 to 162.6)       | 2.9 (1.8 to 4.2)                   | 121.9 (83.6 to 166.3)                  | 4.6 (2.8 to 6.9)  | 122.4 (73.7 to 182)       | 3.9 (2.2 to 6.1)                   | 126.2 (76.2 to 187.3)                  |
| Gabon    | Alcohol use                 | 2.5 (1.7 to 3.5) | 72 (47.9 to 100)          | 1.8 (1.1 to 2.6)                   | 73.8 (48.8 to 102.8)                   | 2.7 (1.6 to 4.1)  | 73.6 (42.6 to 113.6)      | 2.3 (1.3 to 3.8)                   | 75.9 (44.1 to 117.3)                   |
| Gabon    | Diet high in red meat       | 1.2 (0.6 to 1.8) | 33.3 (15.9 to 52)         | 0.8 (0.3 to 1.3)                   | 34.1 (16.3 to 53)                      | 1.2 (0.5 to 1.9)  | 30.8 (13.1 to 52.2)       | 1 (0.4 to 1.7)                     | 31.8 (13.5 to 53.9)                    |
| Gabon    | Low physical activity       | 0.3 (0.1 to 0.5) | 5.8 (2.8 to 10.8)         | 0.2 (0.1 to 0.3)                   | 6 (2.9 to 11.1)                        | 0.4 (0.2 to 0.8)  | 8 (3.3 to 15.4)           | 0.3 (0.1 to 0.6)                   | 8.2 (3.4 to 15.9)                      |
| Gabon    | Smoking                     | 0.1 (0.1 to 0.2) | 3.2 (1.5 to 5.3)          | 0.1 (0 to 0.1)                     | 3.3 (1.5 to 5.4)                       | 0.2 (0.1 to 0.3)  | 3.7 (1.6 to 6.4)          | 0.1 (0.1 to 0.2)                   | 3.8 (1.7 to 6.6)                       |
| Gabon    | Secondhand smoke            | 0.4 (0.1 to 0.7) | 12.2 (2.6 to 22.5)        | 0.3 (0.1 to 0.6)                   | 12.5 (2.7 to 23.1)                     | 0.5 (0.1 to 0.9)  | 13.4 (2.8 to 26.3)        | 0.4 (0.1 to 0.8)                   | 13.8 (2.9 to 27.1)                     |
| Gabon    | Metabolic risks             | 1.6 (0.4 to 3.3) | 29.6 (2 to 66.1)          | 0.9 (0.1 to 1.9)                   | 30.5 (2.4 to 67.9)                     | 3.3 (1 to 6.9)    | 57.8 (8.7 to 133.3)       | 2.1 (0.4 to 4.6)                   | 59.9 (9 to 137.3)                      |
| Gabon    | High body-mass index        | 0.5 (0 to 1.3)   | 6.1 (-8.2 to 23.4)        | 0.2 (-0.1 to 0.7)                  | 6.3 (-8.4 to 23.9)                     | 1.4 (0.1 to 3.3)  | 17.8 (-14 to 55)          | 0.7 (-0.3 to 2)                    | 18.5 (-14.1 to 57)                     |
| Gabon    | High fasting plasma glucose | 1.1 (0.2 to 2.6) | 24.3 (4.4 to 56.7)        | 0.7 (0.1 to 1.6)                   | 25 (4.6 to 58.3)                       | 2 (0.4 to 5)      | 42.9 (7.9 to 107.1)       | 1.4 (0.3 to 3.7)                   | 44.3 (8.2 to 111)                      |
| Gambia   | All risk factors            | 1 (0.5 to 1.5)   | 24.7 (14.4 to 38.3)       | 0.7 (0.4 to 1.1)                   | 25.3 (14.7 to 39.2)                    | 2.1 (1.1 to 3.6)  | 53.2 (27.6 to 90.4)       | 1.6 (0.8 to 2.7)                   | 54.8 (28.8 to 93)                      |
| Gambia   | Behavioral risks            | 0.6 (0.4 to 0.9) | 17.2 (10.6 to 26)         | 0.4 (0.2 to 0.7)                   | 17.6 (10.8 to 26.7)                    | 1.1 (0.6 to 1.7)  | 31.7 (18.1 to 50.6)       | 0.9 (0.5 to 1.5)                   | 32.6 (18.6 to 51.7)                    |
| Gambia   | Alcohol use                 | 0.2 (0.1 to 0.3) | 6.7 (3.8 to 10.8)         | 0.2 (0.1 to 0.3)                   | 6.9 (3.9 to 11.1)                      | 0.5 (0.3 to 0.9)  | 16.1 (8.8 to 26.2)        | 0.4 (0.2 to 0.8)                   | 16.6 (9 to 27)                         |
| Gambia   | Diet high in red meat       | 0.1 (0 to 0.1)   | 2.4 (0.5 to 4.1)          | 0.1 (0 to 0.1)                     | 2.5 (0.5 to 4.2)                       | 0.1 (0 to 0.2)    | 3.4 (0.8 to 6.1)          | 0.1 (0 to 0.2)                     | 3.5 (0.8 to 6.3)                       |
| Gambia   | Low physical activity       | 0.1 (0 to 0.1)   | 1.4 (0.7 to 2.7)          | 0 (0 to 0.1)                       | 1.4 (0.7 to 2.8)                       | 0.1 (0 to 0.2)    | 2.5 (1.2 to 4.7)          | 0.1 (0 to 0.1)                     | 2.6 (1.2 to 4.9)                       |
| Gambia   | Smoking                     | 0 (0 to 0.1)     | 0.7 (0.3 to 1.3)          | 0 (0 to 0)                         | 0.8 (0.3 to 1.3)                       | 0 (0 to 0.1)      | 0.9 (0.4 to 1.7)          | 0 (0 to 0.1)                       | 0.9 (0.4 to 1.8)                       |
| Gambia   | Secondhand smoke            | 0.2 (0 to 0.4)   | 6.4 (1.5 to 12)           | 0.2 (0 to 0.3)                     | 6.6 (1.5 to 12.3)                      | 0.3 (0.1 to 0.6)  | 9.7 (2 to 19.3)           | 0.3 (0.1 to 0.6)                   | 10 (2.1 to 19.8)                       |

| Location | Risk factor                 | 1990               |                           |                                    |                                        | 2019              |                           |                                    |                                        |
|----------|-----------------------------|--------------------|---------------------------|------------------------------------|----------------------------------------|-------------------|---------------------------|------------------------------------|----------------------------------------|
|          |                             | Deaths             | YLLs (Years of Life Lost) | YLDs (Years Lived with Disability) | DALYs (Disability-Adjusted Life Years) | Deaths            | YLLs (Years of Life Lost) | YLDs (Years Lived with Disability) | DALYs (Disability-Adjusted Life Years) |
| Gambia   | Metabolic risks             | 0.4 (0.1 to 0.8)   | 8.2 (1.4 to 18.2)         | 0.3 (0.1 to 0.5)                   | 8.4 (1.5 to 18.8)                      | 1.1 (0.4 to 2.5)  | 23.7 (5.5 to 55)          | 0.7 (0.2 to 1.7)                   | 24.4 (5.7 to 56.4)                     |
| Gambia   | High body-mass index        | 0.2 (0 to 0.4)     | 2.6 (-1.1 to 7.7)         | 0.1 (0 to 0.3)                     | 2.7 (-1.1 to 7.9)                      | 0.4 (0.1 to 1.1)  | 7.9 (-2.5 to 23.9)        | 0.3 (0 to 0.7)                     | 8.1 (-2.6 to 24.5)                     |
| Gambia   | High fasting plasma glucose | 0.3 (0 to 0.6)     | 5.7 (1 to 14.3)           | 0.2 (0 to 0.4)                     | 5.9 (1 to 14.8)                        | 0.7 (0.1 to 1.9)  | 16.7 (3.1 to 42.7)        | 0.5 (0.1 to 1.3)                   | 17.2 (3.2 to 44.1)                     |
| Georgia  | All risk factors            | 4.9 (3.1 to 7.1)   | 132.3 (77 to 191.8)       | 6.1 (3.3 to 9.6)                   | 138.4 (80.4 to 200.1)                  | 6 (3.6 to 9.2)    | 156.2 (91.9 to 239.7)     | 8.5 (4.6 to 13.9)                  | 164.7 (96.6 to 252.3)                  |
| Georgia  | Behavioral risks            | 3 (2 to 3.9)       | 98.1 (64.1 to 130.3)      | 4.4 (2.6 to 6.6)                   | 102.4 (66.7 to 135.8)                  | 3 (2 to 4)        | 91.7 (60.9 to 124)        | 4.9 (2.8 to 7.3)                   | 96.6 (64 to 130.5)                     |
| Georgia  | Alcohol use                 | 0.6 (0.3 to 0.9)   | 22 (11.8 to 34.4)         | 1 (0.5 to 1.7)                     | 22.9 (12.4 to 35.7)                    | 0.9 (0.5 to 1.3)  | 29.5 (17.6 to 44.1)       | 1.6 (0.8 to 2.5)                   | 31.1 (18.6 to 46.3)                    |
| Georgia  | Diet high in red meat       | 0.9 (0.2 to 1.2)   | 28.1 (8.2 to 38.2)        | 1.3 (0.4 to 2)                     | 29.4 (8.5 to 40.1)                     | 0.7 (0.2 to 1)    | 20.4 (4.9 to 30.4)        | 1.1 (0.3 to 1.8)                   | 21.5 (5.1 to 31.9)                     |
| Georgia  | Low physical activity       | 0.2 (0.1 to 0.4)   | 5.2 (3.2 to 10.2)         | 0.2 (0.1 to 0.5)                   | 5.4 (3.4 to 10.8)                      | 0.2 (0.1 to 0.4)  | 4.9 (2.9 to 9.4)          | 0.3 (0.1 to 0.6)                   | 5.2 (3.1 to 9.9)                       |
| Georgia  | Smoking                     | 0.4 (0.3 to 0.6)   | 13.6 (8 to 20.7)          | 0.6 (0.3 to 1)                     | 14.3 (8.3 to 21.6)                     | 0.4 (0.3 to 0.6)  | 12.1 (7 to 18.1)          | 0.7 (0.3 to 1)                     | 12.8 (7.4 to 19.1)                     |
| Georgia  | Secondhand smoke            | 1 (0.2 to 1.7)     | 33.1 (7.7 to 56.6)        | 1.5 (0.4 to 2.7)                   | 34.6 (8.1 to 59.1)                     | 0.9 (0.2 to 1.7)  | 28.9 (6.5 to 51.6)        | 1.5 (0.4 to 2.8)                   | 30.4 (6.9 to 54.6)                     |
| Georgia  | Metabolic risks             | 2.1 (0.5 to 4.1)   | 37.4 (-7.9 to 92.1)       | 1.9 (-0.2 to 4.4)                  | 39.3 (-8 to 96.5)                      | 3.4 (1.1 to 6.5)  | 71.6 (12.8 to 152.2)      | 4 (0.8 to 8.8)                     | 75.6 (13.8 to 160.5)                   |
| Georgia  | High body-mass index        | 1 (-0.1 to 2.3)    | 7 (-26.3 to 38.5)         | 0.4 (-1.1 to 2)                    | 7.5 (-27.3 to 40.3)                    | 1.3 (0.1 to 2.7)  | 17.7 (-12.1 to 50.7)      | 1 (-0.6 to 2.9)                    | 18.7 (-12.5 to 53)                     |
| Georgia  | High fasting plasma glucose | 1.2 (0.2 to 2.8)   | 31.8 (6 to 74.7)          | 1.5 (0.3 to 3.7)                   | 33.3 (6.3 to 78.9)                     | 2.3 (0.4 to 5.1)  | 57.3 (10.6 to 131.2)      | 3.2 (0.6 to 7.6)                   | 60.5 (11.1 to 138.4)                   |
| Germany  | All risk factors            | 10.1 (8.2 to 12.2) | 266.8 (219.5 to 315.3)    | 19.6 (13 to 27.5)                  | 286.4 (236.5 to 339.7)                 | 8.2 (6.3 to 10.4) | 189.6 (149.6 to 234.8)    | 23.7 (14.3 to 35.4)                | 213.3 (168.4 to 266)                   |
| Germany  | Behavioral risks            | 8 (6.9 to 9.1)     | 228.3 (195.9 to 261.1)    | 16.3 (10.9 to 22.6)                | 244.6 (208.8 to 279.5)                 | 5.8 (4.9 to 6.7)  | 147.9 (125.7 to 171.2)    | 18.3 (11.6 to 26.9)                | 166.3 (140.4 to 193.8)                 |
| Germany  | Alcohol use                 | 4.8 (3.8 to 5.8)   | 135.3 (108.8 to 164.5)    | 9.7 (6.2 to 14)                    | 145 (116.4 to 175.9)                   | 3.5 (2.7 to 4.3)  | 88.5 (69.8 to 109.4)      | 11 (6.9 to 16.3)                   | 99.5 (78.3 to 123.1)                   |
| Germany  | Diet high in red meat       | 1.5 (0.8 to 2)     | 42.1 (20.7 to 57)         | 3 (1.4 to 4.7)                     | 45.1 (22.3 to 61.2)                    | 1.1 (0.5 to 1.5)  | 27.5 (13.8 to 37.6)       | 3.4 (1.4 to 5.6)                   | 30.9 (15.3 to 42.6)                    |
| Germany  | Low physical activity       | 0.3 (0.1 to 0.6)   | 6.3 (2.7 to 13)           | 0.5 (0.2 to 1.2)                   | 6.8 (2.9 to 14.2)                      | 0.3 (0.1 to 0.5)  | 5.5 (2.1 to 11.1)         | 0.7 (0.3 to 1.5)                   | 6.2 (2.4 to 12.5)                      |
| Germany  | Smoking                     | 2 (1.4 to 2.6)     | 58.6 (40.5 to 76.9)       | 4.1 (2.4 to 6.2)                   | 62.7 (43.2 to 82.2)                    | 1.3 (0.9 to 1.7)  | 35.1 (24.8 to 45.7)       | 4.3 (2.4 to 6.7)                   | 39.4 (27.8 to 51.6)                    |
| Germany  | Secondhand smoke            | 0.4 (0.1 to 0.7)   | 13.8 (3.3 to 23.8)        | 0.9 (0.2 to 1.7)                   | 14.7 (3.5 to 25.3)                     | 0.2 (0.1 to 0.4)  | 7.6 (1.8 to 13.5)         | 0.9 (0.2 to 1.8)                   | 8.6 (2.1 to 15.1)                      |
| Germany  | Metabolic risks             | 3 (1.1 to 5.6)     | 55.3 (12.9 to 111)        | 4.7 (1.4 to 9.7)                   | 60.1 (14.3 to 119.7)                   | 3.3 (1.3 to 6)    | 58.8 (18.4 to 113.6)      | 7.5 (2.2 to 15.7)                  | 66.4 (20.9 to 127.6)                   |
| Germany  | High body-mass index        | 1.1 (0.2 to 2.3)   | 17.1 (-4.4 to 42.2)       | 1.6 (0 to 3.7)                     | 18.7 (-4.3 to 46)                      | 1.2 (0.3 to 2.4)  | 18.4 (-0.7 to 41.3)       | 2.3 (0 to 5.3)                     | 20.7 (-0.7 to 46.1)                    |
| Germany  | High fasting plasma glucose | 1.9 (0.4 to 4.3)   | 40.5 (7.8 to 91.8)        | 3.4 (0.6 to 7.9)                   | 43.9 (8.5 to 98.9)                     | 2.2 (0.5 to 4.8)  | 43.5 (8.9 to 94.3)        | 5.6 (1.1 to 13.5)                  | 49 (10 to 107)                         |
| Ghana    | All risk factors            | 3.5 (2.1 to 5.3)   | 89.5 (54.5 to 135.1)      | 2.3 (1.3 to 3.6)                   | 91.8 (55.9 to 139)                     | 5.7 (3.4 to 8.9)  | 129.9 (72.1 to 205.1)     | 4.2 (2.3 to 7.1)                   | 134.2 (74.7 to 211.3)                  |
| Ghana    | Behavioral risks            | 2.1 (1.5 to 2.9)   | 63.9 (43.5 to 89.7)       | 1.5 (0.9 to 2.3)                   | 65.4 (44.5 to 91.7)                    | 2.6 (1.9 to 3.7)  | 75.4 (51 to 106.2)        | 2.3 (1.4 to 3.5)                   | 77.7 (52.6 to 109.7)                   |
| Ghana    | Alcohol use                 | 1.3 (0.8 to 1.9)   | 40.5 (25.8 to 59.7)       | 1 (0.6 to 1.5)                     | 41.5 (26.4 to 61.2)                    | 1.6 (1 to 2.4)    | 47.4 (30.2 to 69.4)       | 1.4 (0.8 to 2.3)                   | 48.9 (31.1 to 71.5)                    |
| Ghana    | Diet high in red meat       | 0.3 (0.1 to 0.4)   | 8 (1.6 to 12.6)           | 0.2 (0 to 0.3)                     | 8.2 (1.7 to 12.9)                      | 0.4 (0.1 to 0.6)  | 10.4 (2.1 to 16.7)        | 0.3 (0.1 to 0.6)                   | 10.7 (2.1 to 17.1)                     |
| Ghana    | Low physical activity       | 0.2 (0.1 to 0.4)   | 4.8 (2.6 to 9)            | 0.1 (0.1 to 0.3)                   | 4.9 (2.6 to 9.2)                       | 0.3 (0.1 to 0.5)  | 6.4 (3.4 to 11.8)         | 0.2 (0.1 to 0.4)                   | 6.6 (3.5 to 12.1)                      |
| Ghana    | Smoking                     | 0.2 (0.1 to 0.2)   | 3.8 (2.1 to 6.2)          | 0.1 (0.1 to 0.2)                   | 3.9 (2.2 to 6.4)                       | 0.1 (0.1 to 0.2)  | 3.5 (1.9 to 5.8)          | 0.1 (0.1 to 0.2)                   | 3.6 (2 to 6)                           |
| Ghana    | Secondhand smoke            | 0.2 (0.1 to 0.5)   | 8.4 (2 to 15.9)           | 0.2 (0 to 0.4)                     | 8.6 (2 to 16.2)                        | 0.3 (0.1 to 0.6)  | 9.7 (2.2 to 18.5)         | 0.3 (0.1 to 0.6)                   | 10 (2.2 to 19)                         |
| Ghana    | Metabolic risks             | 1.4 (0.4 to 3.1)   | 28 (2.5 to 66)            | 0.8 (0.2 to 1.9)                   | 28.8 (2.6 to 67.9)                     | 3.3 (1.1 to 6.7)  | 59.7 (7 to 131)           | 2.1 (0.3 to 4.6)                   | 61.8 (7.3 to 134.5)                    |
| Ghana    | High body-mass index        | 0.3 (0 to 0.9)     | 3.2 (-8 to 14.6)          | 0.1 (-0.1 to 0.5)                  | 3.3 (-8.1 to 15.1)                     | 1.4 (0.1 to 3.1)  | 17.3 (-17.2 to 54.2)      | 0.7 (-0.4 to 1.9)                  | 18 (-17.5 to 56.1)                     |
| Ghana    | High fasting plasma glucose | 1.1 (0.2 to 2.8)   | 25.4 (4.4 to 60.9)        | 0.7 (0.1 to 1.7)                   | 26.1 (4.6 to 62.4)                     | 2.1 (0.4 to 4.9)  | 45.4 (8.5 to 108.2)       | 1.5 (0.3 to 3.7)                   | 46.9 (8.8 to 111.7)                    |
| Greece   | All risk factors            | 6.6 (5.2 to 8)     | 175 (139.9 to 208.3)      | 15.5 (10.1 to 21.8)                | 190.5 (151.8 to 226.2)                 | 6.7 (5 to 8.7)    | 157.1 (122 to 199)        | 19.6 (12.2 to 29.6)                | 176.6 (135.8 to 224.3)                 |
| Greece   | Behavioral risks            | 5 (4.1 to 5.8)     | 147.4 (123.5 to 170.3)    | 12.7 (8.4 to 18)                   | 160.2 (134 to 184.5)                   | 4.6 (3.8 to 5.4)  | 122.9 (101.8 to 145)      | 15.2 (9.3 to 22.9)                 | 138.1 (113.5 to 163.7)                 |
| Greece   | Alcohol use                 | 2.2 (1.7 to 2.6)   | 67.5 (54 to 81)           | 5.8 (3.7 to 8.4)                   | 73.3 (59 to 87.9)                      | 1.5 (1.1 to 2)    | 43.2 (32.6 to 55.3)       | 5.3 (3.2 to 8.4)                   | 48.5 (36.6 to 62.8)                    |
| Greece   | Diet high in red meat       | 1.2 (0.6 to 1.6)   | 33.4 (16.9 to 44.9)       | 2.9 (1.3 to 4.7)                   | 36.3 (18.2 to 49.1)                    | 1.2 (0.6 to 1.6)  | 28.9 (14.7 to 40.2)       | 3.6 (1.6 to 6.1)                   | 32.5 (16.7 to 44.9)                    |
| Greece   | Low physical activity       | 0.2 (0.1 to 0.4)   | 4.7 (2.2 to 9.8)          | 0.4 (0.2 to 1)                     | 5.2 (2.4 to 10.9)                      | 0.3 (0.1 to 0.5)  | 4.8 (2 to 9.6)            | 0.6 (0.2 to 1.4)                   | 5.4 (2.3 to 10.9)                      |

| Location  | Risk factor                 | 1990              |                           |                                    |                                        | 2019              |                           |                                    |                                        |
|-----------|-----------------------------|-------------------|---------------------------|------------------------------------|----------------------------------------|-------------------|---------------------------|------------------------------------|----------------------------------------|
|           |                             | Deaths            | YLLs (Years of Life Lost) | YLDs (Years Lived with Disability) | DALYs (Disability-Adjusted Life Years) | Deaths            | YLLs (Years of Life Lost) | YLDs (Years Lived with Disability) | DALYs (Disability-Adjusted Life Years) |
| Greece    | Smoking                     | 1.2 (0.9 to 1.6)  | 37.8 (25.9 to 49.8)       | 3.3 (1.9 to 5)                     | 41 (28.1 to 54.3)                      | 1.6 (1.2 to 2.1)  | 46.2 (33.7 to 59.5)       | 5.7 (3.2 to 9)                     | 51.9 (37.7 to 67.5)                    |
| Greece    | Secondhand smoke            | 0.6 (0.1 to 1.1)  | 18.5 (4.4 to 31.8)        | 1.6 (0.4 to 2.9)                   | 20.1 (4.8 to 34.9)                     | 0.5 (0.1 to 0.8)  | 12.4 (2.9 to 21.9)        | 1.5 (0.3 to 3)                     | 13.9 (3.3 to 25)                       |
| Greece    | Metabolic risks             | 1.9 (0.7 to 3.6)  | 34.7 (6.6 to 70.6)        | 3.4 (0.8 to 6.8)                   | 38.1 (7.9 to 77.2)                     | 2.6 (1 to 4.7)    | 44.1 (13 to 87.9)         | 5.6 (1.6 to 11.6)                  | 49.7 (14.2 to 98.8)                    |
| Greece    | High body-mass index        | 1 (0.2 to 2.1)    | 15 (-4.1 to 38.9)         | 1.5 (-0.2 to 3.7)                  | 16.5 (-4.3 to 42.1)                    | 1.2 (0.3 to 2.4)  | 17 (-1.4 to 39.7)         | 2.2 (-0.1 to 5.5)                  | 19.2 (-1.6 to 44.4)                    |
| Greece    | High fasting plasma glucose | 1 (0.2 to 2.3)    | 20.9 (3.8 to 47.3)        | 2 (0.4 to 4.9)                     | 22.9 (4.2 to 52.3)                     | 1.5 (0.3 to 3.4)  | 29 (5.5 to 66.7)          | 3.7 (0.7 to 9.2)                   | 32.7 (6.3 to 74.6)                     |
| Greenland | All risk factors            | 8.5 (6.5 to 10.9) | 243.2 (183.4 to 311.8)    | 10.6 (6.8 to 15.2)                 | 253.8 (190.5 to 325.3)                 | 6.4 (4.7 to 8.7)  | 164.7 (119 to 224)        | 10.4 (6.6 to 15.4)                 | 175.1 (126.2 to 239.1)                 |
| Greenland | Behavioral risks            | 7.3 (5.7 to 9.2)  | 221.2 (169.2 to 283.7)    | 9.4 (6.1 to 13.6)                  | 230.6 (176.1 to 294.6)                 | 5 (3.7 to 6.5)    | 139.1 (101.8 to 185.5)    | 8.5 (5.5 to 12.5)                  | 147.7 (108.4 to 197.2)                 |
| Greenland | Alcohol use                 | 2.5 (1.6 to 3.5)  | 78.4 (51 to 112.2)        | 3.2 (1.8 to 5)                     | 81.6 (53.1 to 116.8)                   | 1.7 (1.1 to 2.5)  | 52.1 (32.8 to 75.5)       | 3.1 (1.8 to 4.8)                   | 55.2 (35 to 79.6)                      |
| Greenland | Diet high in red meat       | 1.4 (0.7 to 2)    | 42.8 (20.5 to 62.2)       | 1.8 (0.8 to 2.9)                   | 44.6 (21.3 to 64.7)                    | 1 (0.5 to 1.5)    | 28.1 (13.7 to 42.8)       | 1.7 (0.8 to 2.9)                   | 29.8 (14.6 to 45.5)                    |
| Greenland | Low physical activity       | 0.3 (0.1 to 0.6)  | 7.5 (3 to 16)             | 0.4 (0.1 to 0.8)                   | 7.8 (3.1 to 16.7)                      | 0.3 (0.1 to 0.5)  | 5.7 (2 to 11.8)           | 0.4 (0.1 to 0.8)                   | 6.1 (2.1 to 12.6)                      |
| Greenland | Smoking                     | 3.2 (2.2 to 4.3)  | 92.8 (61.7 to 128.3)      | 4 (2.2 to 6.3)                     | 96.8 (64.2 to 133.6)                   | 2.1 (1.5 to 3)    | 56.7 (37.1 to 81.2)       | 3.6 (2.1 to 5.6)                   | 60.2 (39.7 to 85.8)                    |
| Greenland | Secondhand smoke            | 0.8 (0.2 to 1.4)  | 25.3 (6.1 to 44.6)        | 1 (0.2 to 1.9)                     | 26.3 (6.3 to 46.3)                     | 0.4 (0.1 to 0.7)  | 12.1 (2.6 to 22.2)        | 0.7 (0.1 to 1.3)                   | 12.8 (2.8 to 23.6)                     |
| Greenland | Metabolic risks             | 1.7 (0.5 to 3.4)  | 30.5 (-0.3 to 70.1)       | 1.7 (0.3 to 3.5)                   | 32.2 (0.1 to 73.2)                     | 2 (0.7 to 3.8)    | 35.6 (5.1 to 78.3)        | 2.6 (0.5 to 5.2)                   | 38.2 (6 to 84)                         |
| Greenland | High body-mass index        | 1.2 (0.1 to 2.6)  | 18.2 (-9.1 to 51.8)       | 1.1 (-0.1 to 2.7)                  | 19.4 (-9.3 to 54.1)                    | 1.1 (0.2 to 2.4)  | 15.8 (-5.8 to 45.4)       | 1.3 (-0.2 to 3.2)                  | 17.1 (-6 to 48.5)                      |
| Greenland | High fasting plasma glucose | 0.5 (0.1 to 1.3)  | 13 (2.2 to 31.5)          | 0.6 (0.1 to 1.6)                   | 13.6 (2.3 to 33.2)                     | 1 (0.2 to 2.3)    | 21.3 (3.8 to 51.2)        | 1.4 (0.3 to 3.6)                   | 22.7 (4.1 to 54.7)                     |
| Grenada   | All risk factors            | 5.4 (3.5 to 8)    | 142.5 (94.1 to 210.3)     | 5.6 (3.3 to 8.8)                   | 148.1 (97.6 to 218.1)                  | 7.8 (4.8 to 11.8) | 186.1 (114.5 to 280.7)    | 9.9 (5.5 to 16)                    | 196 (120.2 to 295)                     |
| Grenada   | Behavioral risks            | 3 (2.4 to 3.7)    | 92 (72.9 to 114.9)        | 3.4 (2.2 to 4.8)                   | 95.4 (75.7 to 118.7)                   | 3.6 (2.8 to 4.5)  | 105.2 (81 to 131.6)       | 5.3 (3.4 to 7.5)                   | 110.4 (85.3 to 137.8)                  |
| Grenada   | Alcohol use                 | 1.5 (1.2 to 2)    | 53 (39.6 to 68.6)         | 1.9 (1.2 to 2.7)                   | 54.9 (41.3 to 71.1)                    | 1.8 (1.4 to 2.3)  | 59.3 (44.1 to 76.8)       | 2.9 (1.8 to 4.3)                   | 62.2 (46.4 to 80.6)                    |
| Grenada   | Diet high in red meat       | 0.3 (0.1 to 0.4)  | 9 (2 to 12.9)             | 0.3 (0.1 to 0.5)                   | 9.3 (2 to 13.3)                        | 0.5 (0.1 to 0.7)  | 13.2 (2.6 to 19)          | 0.7 (0.1 to 1.1)                   | 13.8 (2.8 to 19.9)                     |
| Grenada   | Low physical activity       | 0.4 (0.1 to 0.7)  | 8.6 (3.3 to 17.2)         | 0.4 (0.1 to 0.7)                   | 9 (3.4 to 17.9)                        | 0.5 (0.2 to 1)    | 11.5 (4.1 to 22.4)        | 0.6 (0.2 to 1.3)                   | 12.1 (4.3 to 23.7)                     |
| Grenada   | Smoking                     | 0.5 (0.3 to 0.7)  | 12.7 (7.7 to 18.6)        | 0.5 (0.3 to 0.8)                   | 13.2 (8 to 19.3)                       | 0.5 (0.3 to 0.8)  | 13 (8 to 19.4)            | 0.7 (0.4 to 1.1)                   | 13.7 (8.3 to 20.3)                     |
| Grenada   | Secondhand smoke            | 0.4 (0.1 to 0.7)  | 12.4 (2.7 to 22.3)        | 0.5 (0.1 to 0.9)                   | 12.9 (2.8 to 23.1)                     | 0.4 (0.1 to 0.8)  | 12.7 (3 to 23)            | 0.6 (0.1 to 1.2)                   | 13.4 (3.1 to 24.1)                     |
| Grenada   | Metabolic risks             | 2.7 (0.8 to 5.5)  | 56.8 (11.1 to 126.2)      | 2.5 (0.6 to 5.4)                   | 59.2 (11.7 to 132.2)                   | 4.7 (1.6 to 9.1)  | 91.9 (15.8 to 195)        | 5.2 (1.2 to 11.2)                  | 97.1 (16.8 to 204.2)                   |
| Grenada   | High body-mass index        | 0.6 (-0.1 to 1.5) | 6.9 (-11.5 to 27.4)       | 0.4 (-0.3 to 1.3)                  | 7.3 (-11.8 to 28.7)                    | 1.3 (0.1 to 3.1)  | 15.3 (-18.9 to 51.9)      | 1.1 (-0.7 to 3.2)                  | 16.4 (-19.8 to 55.4)                   |
| Grenada   | High fasting plasma glucose | 2.2 (0.4 to 4.9)  | 51.7 (9.7 to 118.3)       | 2.1 (0.4 to 5)                     | 53.8 (10.1 to 123.4)                   | 3.6 (0.8 to 7.8)  | 81.6 (17 to 178)          | 4.4 (0.9 to 10.2)                  | 86 (17.8 to 187.5)                     |
| Guam      | All risk factors            | 6.4 (3.9 to 9.3)  | 146.6 (91 to 207)         | 6.7 (3.7 to 10.4)                  | 153.2 (94.9 to 215.6)                  | 7.1 (4.1 to 10.2) | 179 (105.9 to 255.4)      | 9.2 (5.2 to 14.2)                  | 188.2 (111.3 to 266)                   |
| Guam      | Behavioral risks            | 2.2 (1.5 to 2.9)  | 55.4 (37.3 to 75.5)       | 2.5 (1.5 to 3.8)                   | 57.9 (39.3 to 79)                      | 2.2 (1.5 to 3)    | 65 (42.6 to 89.1)         | 3.3 (1.9 to 5.1)                   | 68.3 (44.8 to 93.4)                    |
| Guam      | Alcohol use                 | 0.1 (0 to 0.3)    | 4.2 (0 to 10.9)           | 0.2 (0 to 0.5)                     | 4.3 (0 to 11.2)                        | 0.2 (0 to 0.6)    | 9.1 (0 to 20.1)           | 0.5 (0 to 1.1)                     | 9.5 (0 to 21.2)                        |
| Guam      | Diet high in red meat       | 0.6 (0.2 to 0.9)  | 15.8 (6.3 to 22.8)        | 0.7 (0.3 to 1.1)                   | 16.5 (6.6 to 23.9)                     | 0.6 (0.3 to 0.9)  | 18.5 (7.5 to 28.1)        | 0.9 (0.4 to 1.5)                   | 19.5 (7.9 to 29.4)                     |
| Guam      | Low physical activity       | 0.3 (0.1 to 0.5)  | 5.5 (2.2 to 10.3)         | 0.3 (0.1 to 0.5)                   | 5.7 (2.3 to 10.8)                      | 0.3 (0.1 to 0.5)  | 6.1 (2.3 to 11.9)         | 0.3 (0.1 to 0.7)                   | 6.4 (2.4 to 12.6)                      |
| Guam      | Smoking                     | 0.6 (0.3 to 0.9)  | 16 (8.7 to 25.4)          | 0.7 (0.4 to 1.2)                   | 16.7 (9.1 to 26.5)                     | 0.6 (0.4 to 0.9)  | 17.3 (9.3 to 26.5)        | 0.9 (0.4 to 1.5)                   | 18.2 (9.7 to 27.9)                     |
| Guam      | Secondhand smoke            | 0.7 (0.1 to 1.2)  | 17 (4 to 30.5)            | 0.8 (0.2 to 1.4)                   | 17.8 (4.2 to 31.9)                     | 0.6 (0.2 to 1)    | 17.5 (4.5 to 31.7)        | 0.9 (0.2 to 1.6)                   | 18.4 (4.7 to 33.1)                     |
| Guam      | Metabolic risks             | 4.9 (2.2 to 8)    | 105.3 (46.7 to 170)       | 4.8 (2 to 8.3)                     | 110.1 (48.7 to 178.1)                  | 5.6 (2.4 to 8.8)  | 131.7 (56.7 to 209.4)     | 6.7 (2.9 to 11.3)                  | 138.5 (60 to 219.8)                    |
| Guam      | High body-mass index        | 3.9 (1.3 to 6.8)  | 84.3 (27.5 to 147.3)      | 3.8 (1.2 to 7.1)                   | 88.1 (29.5 to 152.2)                   | 4.4 (1.6 to 7.5)  | 103.2 (36.9 to 175.6)     | 5.3 (1.9 to 9.4)                   | 108.5 (39 to 184.1)                    |
| Guam      | High fasting plasma glucose | 1.4 (0.3 to 3.1)  | 27.7 (5.5 to 63.2)        | 1.3 (0.2 to 3.1)                   | 29 (5.7 to 66.4)                       | 1.6 (0.3 to 3.8)  | 38.9 (7.9 to 89.6)        | 2 (0.4 to 4.8)                     | 40.9 (8.3 to 94.1)                     |
| Guatemala | All risk factors            | 1.2 (0.7 to 1.9)  | 31.2 (19.1 to 48.1)       | 0.9 (0.5 to 1.5)                   | 32.1 (19.7 to 49.6)                    | 2.1 (1.1 to 3.8)  | 50 (24.5 to 91.3)         | 2.3 (1 to 4.2)                     | 52.3 (25.6 to 95.5)                    |
| Guatemala | Behavioral risks            | 0.6 (0.4 to 0.8)  | 19.7 (14.1 to 25.5)       | 0.5 (0.3 to 0.8)                   | 20.2 (14.5 to 26.3)                    | 0.6 (0.4 to 0.9)  | 18.9 (12.4 to 26.8)       | 0.8 (0.5 to 1.2)                   | 19.7 (12.8 to 27.9)                    |
| Guatemala | Alcohol use                 | 0.3 (0.2 to 0.3)  | 9.1 (6.5 to 12.2)         | 0.2 (0.1 to 0.4)                   | 9.3 (6.7 to 12.5)                      | 0.2 (0.1 to 0.3)  | 6.6 (4.1 to 9.8)          | 0.3 (0.2 to 0.4)                   | 6.8 (4.3 to 10.1)                      |
| Guatemala | Diet high in red meat       | 0.1 (0 to 0.1)    | 2.7 (0.6 to 4)            | 0.1 (0 to 0.1)                     | 2.8 (0.6 to 4.1)                       | 0.1 (0 to 0.2)    | 3.8 (0.8 to 6.2)          | 0.2 (0 to 0.3)                     | 4 (0.8 to 6.5)                         |

| Location      | Risk factor                 | 1990             |                           |                                    |                                        | 2019              |                           |                                    |                                        |
|---------------|-----------------------------|------------------|---------------------------|------------------------------------|----------------------------------------|-------------------|---------------------------|------------------------------------|----------------------------------------|
|               |                             | Deaths           | YLLs (Years of Life Lost) | YLDs (Years Lived with Disability) | DALYs (Disability-Adjusted Life Years) | Deaths            | YLLs (Years of Life Lost) | YLDs (Years Lived with Disability) | DALYs (Disability-Adjusted Life Years) |
| Guatemala     | Low physical activity       | 0 (0 to 0.1)     | 0.9 (0.6 to 2.7)          | 0 (0 to 0.1)                       | 0.9 (0.6 to 2.8)                       | 0 (0 to 0.1)      | 1 (0.6 to 3)              | 0 (0 to 0.1)                       | 1.1 (0.7 to 3.1)                       |
| Guatemala     | Smoking                     | 0.1 (0.1 to 0.2) | 3.3 (1.7 to 5.3)          | 0.1 (0 to 0.2)                     | 3.4 (1.7 to 5.5)                       | 0.1 (0.1 to 0.2)  | 3.2 (1.6 to 5.2)          | 0.1 (0.1 to 0.2)                   | 3.3 (1.6 to 5.5)                       |
| Guatemala     | Secondhand smoke            | 0.1 (0 to 0.2)   | 4.3 (1.1 to 7.7)          | 0.1 (0 to 0.2)                     | 4.4 (1.1 to 7.9)                       | 0.2 (0 to 0.3)    | 4.8 (1.1 to 8.9)          | 0.2 (0 to 0.4)                     | 5 (1.2 to 9.2)                         |
| Guatemala     | Metabolic risks             | 0.6 (0.2 to 1.3) | 12.3 (1.2 to 28.4)        | 0.4 (0.1 to 1)                     | 12.7 (1.3 to 29.3)                     | 1.5 (0.5 to 3.2)  | 33.1 (7.6 to 72)          | 1.6 (0.4 to 3.5)                   | 34.7 (8.1 to 74.7)                     |
| Guatemala     | High body-mass index        | 0.1 (0 to 0.3)   | 0.9 (-4 to 5.1)           | 0.1 (-0.1 to 0.2)                  | 1 (-4 to 5.4)                          | 0.4 (0.1 to 0.9)  | 5.6 (-3.3 to 16.2)        | 0.3 (-0.1 to 0.8)                  | 5.9 (-3.3 to 16.9)                     |
| Guatemala     | High fasting plasma glucose | 0.5 (0.1 to 1.2) | 11.6 (2.2 to 27.2)        | 0.4 (0.1 to 0.9)                   | 12 (2.3 to 27.9)                       | 1.2 (0.2 to 2.8)  | 28.9 (5.6 to 67.7)        | 1.3 (0.3 to 3.3)                   | 30.2 (5.8 to 70.7)                     |
| Guinea        | All risk factors            | 1.6 (0.9 to 2.5) | 39.8 (22.1 to 62.3)       | 1 (0.5 to 1.6)                     | 40.8 (22.7 to 64.2)                    | 2.7 (1.5 to 4.6)  | 63.9 (34.5 to 108.7)      | 1.7 (0.8 to 3.1)                   | 65.6 (35.3 to 111.5)                   |
| Guinea        | Behavioral risks            | 0.8 (0.5 to 1.2) | 24.1 (15.2 to 34.8)       | 0.5 (0.3 to 0.8)                   | 24.6 (15.6 to 35.7)                    | 1.1 (0.7 to 1.7)  | 32.7 (20.1 to 48.7)       | 0.8 (0.4 to 1.3)                   | 33.5 (20.6 to 49.9)                    |
| Guinea        | Alcohol use                 | 0.2 (0.1 to 0.3) | 6.4 (3.6 to 9.9)          | 0.1 (0.1 to 0.2)                   | 6.5 (3.7 to 10.1)                      | 0.3 (0.2 to 0.5)  | 9.5 (5.2 to 15.4)         | 0.2 (0.1 to 0.4)                   | 9.7 (5.3 to 15.8)                      |
| Guinea        | Diet high in red meat       | 0.1 (0 to 0.2)   | 3.9 (1 to 5.8)            | 0.1 (0 to 0.1)                     | 4 (1.1 to 6)                           | 0.2 (0 to 0.4)    | 6.9 (1.4 to 11.5)         | 0.2 (0 to 0.3)                     | 7 (1.4 to 11.8)                        |
| Guinea        | Low physical activity       | 0.1 (0.1 to 0.2) | 2.9 (1.6 to 5.3)          | 0.1 (0 to 0.1)                     | 2.9 (1.6 to 5.5)                       | 0.2 (0.1 to 0.3)  | 3.6 (1.9 to 6.8)          | 0.1 (0 to 0.2)                     | 3.7 (1.9 to 7)                         |
| Guinea        | Smoking                     | 0.1 (0 to 0.1)   | 1.8 (0.9 to 2.9)          | 0 (0 to 0.1)                       | 1.8 (0.9 to 3)                         | 0.1 (0.1 to 0.2)  | 2.6 (1.3 to 4.6)          | 0.1 (0 to 0.1)                     | 2.7 (1.3 to 4.7)                       |
| Guinea        | Secondhand smoke            | 0.3 (0.1 to 0.6) | 9.7 (2.2 to 17.5)         | 0.2 (0 to 0.4)                     | 9.9 (2.2 to 17.8)                      | 0.4 (0.1 to 0.7)  | 10.9 (2.4 to 20.8)        | 0.3 (0.1 to 0.5)                   | 11.2 (2.5 to 21.3)                     |
| Guinea        | Metabolic risks             | 0.8 (0.2 to 1.7) | 16.7 (2.7 to 35.7)        | 0.5 (0.1 to 0.9)                   | 17.1 (2.9 to 36.6)                     | 1.6 (0.5 to 3.4)  | 33.2 (6.9 to 74.6)        | 1 (0.2 to 2.1)                     | 34.2 (7.3 to 76.2)                     |
| Guinea        | High body-mass index        | 0.3 (0 to 0.7)   | 4.9 (-2.5 to 14.7)        | 0.2 (0 to 0.4)                     | 5 (-2.5 to 15.2)                       | 0.6 (0.1 to 1.3)  | 9.2 (-4.6 to 26.1)        | 0.3 (0 to 0.8)                     | 9.5 (-4.5 to 26.7)                     |
| Guinea        | High fasting plasma glucose | 0.5 (0.1 to 1.3) | 12.1 (2.2 to 29.3)        | 0.3 (0.1 to 0.8)                   | 12.4 (2.2 to 30)                       | 1.1 (0.2 to 2.6)  | 25 (4.6 to 60.1)          | 0.7 (0.1 to 1.8)                   | 25.7 (4.7 to 61.8)                     |
| Guinea-Bissau | All risk factors            | 2.4 (1.4 to 3.7) | 67 (39.9 to 104.2)        | 1.5 (0.8 to 2.5)                   | 68.5 (40.9 to 106.2)                   | 3.7 (2 to 6.5)    | 96.2 (52.5 to 170.3)      | 2.5 (1.3 to 4.4)                   | 98.7 (53.9 to 175)                     |
| Guinea-Bissau | Behavioral risks            | 1.6 (1 to 2.3)   | 50.7 (31.7 to 73.6)       | 1.1 (0.6 to 1.6)                   | 51.7 (32.5 to 75.1)                    | 2 (1.2 to 3.2)    | 62.2 (37.4 to 99.3)       | 1.5 (0.8 to 2.5)                   | 63.7 (38.2 to 101.7)                   |
| Guinea-Bissau | Alcohol use                 | 0.8 (0.5 to 1.2) | 26.2 (15.7 to 39.8)       | 0.5 (0.3 to 0.9)                   | 26.7 (16.1 to 40.7)                    | 1 (0.6 to 1.6)    | 31.7 (17.6 to 52.7)       | 0.8 (0.4 to 1.3)                   | 32.5 (18.1 to 54.1)                    |
| Guinea-Bissau | Diet high in red meat       | 0.3 (0.1 to 0.5) | 10.3 (1.9 to 16.8)        | 0.2 (0 to 0.4)                     | 10.5 (1.9 to 17.1)                     | 0.4 (0.1 to 0.8)  | 13.5 (2.7 to 23.7)        | 0.3 (0.1 to 0.6)                   | 13.8 (2.8 to 24.3)                     |
| Guinea-Bissau | Low physical activity       | 0.1 (0.1 to 0.2) | 3.4 (1.7 to 6.5)          | 0.1 (0 to 0.2)                     | 3.4 (1.8 to 6.7)                       | 0.2 (0.1 to 0.4)  | 4.5 (2.3 to 8.6)          | 0.1 (0.1 to 0.2)                   | 4.6 (2.4 to 8.8)                       |
| Guinea-Bissau | Smoking                     | 0.1 (0 to 0.1)   | 1.7 (0.8 to 3.1)          | 0 (0 to 0.1)                       | 1.8 (0.8 to 3.2)                       | 0.1 (0 to 0.1)    | 1.7 (0.8 to 3.2)          | 0 (0 to 0.1)                       | 1.8 (0.8 to 3.2)                       |
| Guinea-Bissau | Secondhand smoke            | 0.3 (0.1 to 0.6) | 10.8 (2.3 to 20.6)        | 0.2 (0 to 0.4)                     | 11.1 (2.3 to 21.1)                     | 0.4 (0.1 to 0.8)  | 12.8 (2.8 to 26.8)        | 0.3 (0.1 to 0.6)                   | 13.1 (2.8 to 27.4)                     |
| Guinea-Bissau | Metabolic risks             | 0.9 (0.2 to 1.9) | 17.9 (1.8 to 43.9)        | 0.5 (0.1 to 1.1)                   | 18.4 (1.9 to 44.9)                     | 1.8 (0.5 to 4.1)  | 37.1 (6 to 92.3)          | 1.1 (0.3 to 2.5)                   | 38.2 (6.2 to 94.5)                     |
| Guinea-Bissau | High body-mass index        | 0.2 (0 to 0.6)   | 2.5 (-4.7 to 11.4)        | 0.1 (0 to 0.3)                     | 2.6 (-4.8 to 11.8)                     | 0.5 (0 to 1.3)    | 6 (-8.4 to 23.7)          | 0.2 (-0.1 to 0.7)                  | 6.2 (-8.5 to 24.5)                     |
| Guinea-Bissau | High fasting plasma glucose | 0.7 (0.1 to 1.6) | 15.8 (2.9 to 38.7)        | 0.4 (0.1 to 1)                     | 16.2 (2.9 to 39.6)                     | 1.4 (0.3 to 3.5)  | 32.2 (5.7 to 84.6)        | 0.9 (0.2 to 2.3)                   | 33.1 (5.9 to 86.6)                     |
| Guyana        | All risk factors            | 5 (3 to 7.8)     | 124.5 (74.2 to 196.8)     | 4.2 (2.3 to 7.1)                   | 128.7 (76.9 to 202.9)                  | 5.8 (3 to 10.1)   | 143 (69.7 to 256.4)       | 5.9 (2.8 to 11)                    | 148.9 (72.7 to 268.1)                  |
| Guyana        | Behavioral risks            | 2.4 (1.8 to 3)   | 69.3 (50.9 to 88.8)       | 2.2 (1.4 to 3.2)                   | 71.5 (52.6 to 91.7)                    | 2.2 (1.5 to 3)    | 64.7 (43.1 to 90.4)       | 2.5 (1.5 to 3.8)                   | 67.2 (45.1 to 93)                      |
| Guyana        | Alcohol use                 | 0.9 (0.7 to 1.3) | 30.5 (21.6 to 41.1)       | 0.9 (0.6 to 1.4)                   | 31.5 (22.2 to 42.5)                    | 0.7 (0.5 to 1.1)  | 25.3 (16.1 to 38.7)       | 0.9 (0.5 to 1.5)                   | 26.2 (16.6 to 40)                      |
| Guyana        | Diet high in red meat       | 0.2 (0.1 to 0.3) | 6.2 (1.6 to 9.2)          | 0.2 (0 to 0.3)                     | 6.4 (1.6 to 9.5)                       | 0.2 (0.1 to 0.4)  | 6.8 (1.7 to 11.1)         | 0.3 (0.1 to 0.5)                   | 7.1 (1.7 to 11.5)                      |
| Guyana        | Low physical activity       | 0.4 (0.1 to 0.7) | 8.5 (3.2 to 16.5)         | 0.3 (0.1 to 0.6)                   | 8.7 (3.3 to 17.1)                      | 0.4 (0.1 to 0.8)  | 10.5 (3.6 to 21.1)        | 0.4 (0.1 to 0.9)                   | 10.9 (3.7 to 21.9)                     |
| Guyana        | Smoking                     | 0.4 (0.3 to 0.6) | 11.5 (6.7 to 17.2)        | 0.4 (0.2 to 0.6)                   | 11.9 (6.9 to 17.7)                     | 0.4 (0.2 to 0.6)  | 9.9 (5.7 to 15.8)         | 0.4 (0.2 to 0.7)                   | 10.3 (6 to 16.5)                       |
| Guyana        | Secondhand smoke            | 0.5 (0.1 to 0.9) | 15.4 (3.2 to 27.4)        | 0.5 (0.1 to 0.9)                   | 15.8 (3.3 to 28.2)                     | 0.5 (0.1 to 0.8)  | 14.4 (3.4 to 26.8)        | 0.5 (0.1 to 1)                     | 14.9 (3.6 to 27.8)                     |
| Guyana        | Metabolic risks             | 2.9 (0.9 to 5.9) | 61.6 (12.9 to 135.4)      | 2.2 (0.6 to 4.8)                   | 63.8 (13.5 to 140.6)                   | 4 (1.2 to 8.4)    | 85.8 (15.1 to 196.2)      | 3.7 (0.9 to 8.5)                   | 89.6 (15.9 to 204.9)                   |
| Guyana        | High body-mass index        | 0.7 (0 to 1.5)   | 8.5 (-8.3 to 28.4)        | 0.4 (-0.1 to 1.1)                  | 8.9 (-8.4 to 29.3)                     | 0.9 (0 to 2.2)    | 8.2 (-19.7 to 36.8)       | 0.6 (-0.5 to 1.8)                  | 8.8 (-20.2 to 38.8)                    |
| Guyana        | High fasting plasma glucose | 2.3 (0.5 to 5.2) | 55.2 (11 to 127.2)        | 1.9 (0.4 to 4.6)                   | 57.1 (11.4 to 132.9)                   | 3.3 (0.7 to 7.4)  | 81.7 (17 to 191.1)        | 3.3 (0.7 to 8.1)                   | 85.1 (17.9 to 198.3)                   |
| Haiti         | All risk factors            | 4.4 (2.5 to 7.4) | 122.1 (70.8 to 198.9)     | 2.9 (1.5 to 5)                     | 125.1 (72.7 to 203.4)                  | 5.8 (2.9 to 10.5) | 154.2 (76 to 280.6)       | 4.4 (2.1 to 8.3)                   | 158.5 (78.7 to 288.3)                  |
| Haiti         | Behavioral risks            | 2.4 (1.7 to 3.1) | 73.8 (51.5 to 100.8)      | 1.7 (1 to 2.5)                     | 75.5 (52.8 to 103.3)                   | 2.5 (1.6 to 3.7)  | 75.4 (46.7 to 114.3)      | 2 (1.1 to 3.2)                     | 77.4 (48 to 117.4)                     |
| Haiti         | Alcohol use                 | 1 (0.7 to 1.4)   | 34.3 (23.1 to 48.9)       | 0.7 (0.4 to 1.1)                   | 35.1 (23.6 to 50)                      | 1.1 (0.7 to 1.7)  | 37.5 (22.6 to 58.3)       | 1 (0.5 to 1.6)                     | 38.4 (23.2 to 59.7)                    |
| Haiti         | Diet high in red meat       | 0.3 (0.1 to 0.5) | 10.6 (2 to 17.1)          | 0.2 (0 to 0.4)                     | 10.8 (2 to 17.5)                       | 0.4 (0.1 to 0.7)  | 12 (2.3 to 21.5)          | 0.3 (0.1 to 0.6)                   | 12.3 (2.3 to 22.1)                     |
| Haiti         | Low physical activity       | 0.4 (0.1 to 0.7) | 8.7 (3.4 to 18.4)         | 0.2 (0.1 to 0.5)                   | 8.9 (3.5 to 18.9)                      | 0.4 (0.1 to 0.8)  | 9.8 (3.3 to 21.4)         | 0.3 (0.1 to 0.6)                   | 10.1 (3.5 to 22)                       |

| Location | Risk factor                 | 1990              |                           |                                    |                                        | 2019              |                           |                                    |                                        |
|----------|-----------------------------|-------------------|---------------------------|------------------------------------|----------------------------------------|-------------------|---------------------------|------------------------------------|----------------------------------------|
|          |                             | Deaths            | YLLs (Years of Life Lost) | YLDs (Years Lived with Disability) | DALYs (Disability-Adjusted Life Years) | Deaths            | YLLs (Years of Life Lost) | YLDs (Years Lived with Disability) | DALYs (Disability-Adjusted Life Years) |
| Haiti    | Smoking                     | 0.4 (0.2 to 0.6)  | 10.5 (5.1 to 17.2)        | 0.3 (0.1 to 0.4)                   | 10.8 (5.2 to 17.6)                     | 0.3 (0.2 to 0.6)  | 8.6 (4 to 15.3)           | 0.2 (0.1 to 0.5)                   | 8.8 (4.1 to 15.7)                      |
| Haiti    | Secondhand smoke            | 0.4 (0.1 to 0.7)  | 12.1 (2.6 to 23.7)        | 0.3 (0.1 to 0.5)                   | 12.4 (2.7 to 24.1)                     | 0.3 (0.1 to 0.6)  | 9.9 (2.2 to 19.6)         | 0.3 (0.1 to 0.5)                   | 10.2 (2.3 to 20.1)                     |
| Haiti    | Metabolic risks             | 2.2 (0.5 to 5.1)  | 53.3 (6.4 to 126)         | 1.4 (0.3 to 3.3)                   | 54.7 (6.8 to 129.2)                    | 3.7 (0.9 to 8.1)  | 86.7 (16 to 203.6)        | 2.6 (0.6 to 6.2)                   | 89.2 (16.6 to 210.1)                   |
| Haiti    | High body-mass index        | 0.2 (-0.1 to 0.7) | 0 (-12.9 to 12)           | 0.1 (-0.2 to 0.4)                  | 0.1 (-13.1 to 12.4)                    | 0.4 (-0.1 to 1.1) | 3.4 (-12.3 to 18.8)       | 0.2 (-0.2 to 0.7)                  | 3.6 (-12.4 to 19.4)                    |
| Haiti    | High fasting plasma glucose | 2 (0.4 to 4.9)    | 53.9 (9.8 to 125.7)       | 1.3 (0.2 to 3.2)                   | 55.3 (10 to 129.3)                     | 3.3 (0.6 to 7.8)  | 84.9 (16.4 to 202.5)      | 2.4 (0.5 to 6.1)                   | 87.3 (16.9 to 209.1)                   |
| Honduras | All risk factors            | 1.4 (0.8 to 2.3)  | 36 (21 to 58.3)           | 1.2 (0.6 to 2)                     | 37.1 (21.7 to 60.3)                    | 2.7 (1.4 to 4.7)  | 63.1 (31.5 to 112.5)      | 2.8 (1.3 to 5.4)                   | 66 (33.1 to 117.8)                     |
| Honduras | Behavioral risks            | 0.7 (0.4 to 0.9)  | 21 (13.5 to 29.2)         | 0.6 (0.4 to 0.9)                   | 21.6 (13.8 to 30.1)                    | 0.9 (0.6 to 1.4)  | 26.3 (15.6 to 40.4)       | 1.1 (0.6 to 1.8)                   | 27.4 (16.4 to 42)                      |
| Honduras | Alcohol use                 | 0.1 (0.1 to 0.2)  | 4.5 (3.1 to 6.3)          | 0.1 (0.1 to 0.2)                   | 4.6 (3.2 to 6.5)                       | 0.2 (0.1 to 0.3)  | 6.2 (3.6 to 9.7)          | 0.3 (0.1 to 0.4)                   | 6.5 (3.8 to 10.1)                      |
| Honduras | Diet high in red meat       | 0.1 (0 to 0.2)    | 4.3 (0.8 to 6.7)          | 0.1 (0 to 0.2)                     | 4.4 (0.8 to 6.8)                       | 0.2 (0 to 0.4)    | 6.1 (1.1 to 10.5)         | 0.3 (0 to 0.5)                     | 6.3 (1.1 to 11)                        |
| Honduras | Low physical activity       | 0 (0 to 0.1)      | 1.2 (0.7 to 2.8)          | 0 (0 to 0.1)                       | 1.2 (0.7 to 2.9)                       | 0.1 (0 to 0.1)    | 1.7 (0.9 to 3.6)          | 0.1 (0 to 0.2)                     | 1.8 (0.9 to 3.8)                       |
| Honduras | Smoking                     | 0.2 (0.1 to 0.3)  | 4.9 (2.7 to 7.6)          | 0.2 (0.1 to 0.3)                   | 5.1 (2.8 to 7.9)                       | 0.2 (0.1 to 0.3)  | 5.2 (2.8 to 8.8)          | 0.2 (0.1 to 0.4)                   | 5.4 (2.9 to 9.2)                       |
| Honduras | Secondhand smoke            | 0.2 (0 to 0.4)    | 6.7 (1.5 to 12.1)         | 0.2 (0 to 0.4)                     | 6.9 (1.5 to 12.4)                      | 0.3 (0.1 to 0.5)  | 7.8 (1.9 to 14.6)         | 0.3 (0.1 to 0.7)                   | 8.2 (2 to 15.2)                        |
| Honduras | Metabolic risks             | 0.8 (0.2 to 1.6)  | 16.3 (2.5 to 37.7)        | 0.6 (0.1 to 1.3)                   | 16.8 (2.6 to 39)                       | 1.9 (0.6 to 3.8)  | 39.8 (10.2 to 84.5)       | 1.9 (0.5 to 4.1)                   | 41.6 (10.7 to 88.7)                    |
| Honduras | High body-mass index        | 0.2 (0 to 0.5)    | 2.6 (-4.3 to 8.7)         | 0.1 (-0.1 to 0.4)                  | 2.7 (-4.4 to 9)                        | 0.6 (0.1 to 1.3)  | 9.8 (-3.6 to 26.4)        | 0.5 (0 to 1.3)                     | 10.3 (-3.8 to 27.5)                    |
| Honduras | High fasting plasma glucose | 0.6 (0.1 to 1.4)  | 14.1 (2.8 to 34.2)        | 0.5 (0.1 to 1.2)                   | 14.6 (2.9 to 35.1)                     | 1.4 (0.3 to 3.3)  | 31.7 (6 to 78.6)          | 1.4 (0.3 to 3.7)                   | 33.1 (6.3 to 81.7)                     |
| Hungary  | All risk factors            | 8.3 (6.5 to 10.3) | 217.9 (171.8 to 263.8)    | 11.9 (7.6 to 16.8)                 | 229.8 (181 to 278.1)                   | 6.4 (4.5 to 8.9)  | 154.8 (109.7 to 212.2)    | 13.3 (8.3 to 20.2)                 | 168.1 (120.5 to 231.5)                 |
| Hungary  | Behavioral risks            | 6.2 (5.1 to 7.1)  | 180.7 (151.8 to 207.4)    | 9.7 (6.5 to 13.8)                  | 190.4 (159.4 to 220.5)                 | 4.1 (3.1 to 5.2)  | 111.6 (85.1 to 145.2)     | 9.7 (6.2 to 14.4)                  | 121.3 (92.3 to 157)                    |
| Hungary  | Alcohol use                 | 2.7 (2.2 to 3.3)  | 80.9 (64.2 to 97.8)       | 4.4 (2.9 to 6.3)                   | 85.3 (67.3 to 103.5)                   | 1.6 (1.1 to 2.1)  | 42.8 (30.3 to 58)         | 3.7 (2.2 to 5.8)                   | 46.5 (32.8 to 62.6)                    |
| Hungary  | Diet high in red meat       | 1.1 (0.5 to 1.5)  | 32.3 (13.8 to 42.2)       | 1.7 (0.7 to 2.7)                   | 34 (14.5 to 44.6)                      | 0.8 (0.3 to 1.2)  | 21.2 (8.4 to 31.7)        | 1.8 (0.7 to 3)                     | 23.1 (9 to 34.3)                       |
| Hungary  | Low physical activity       | 0.2 (0.1 to 0.4)  | 5.3 (3.2 to 9.2)          | 0.3 (0.2 to 0.6)                   | 5.6 (3.3 to 9.8)                       | 0.2 (0.1 to 0.4)  | 4.2 (2.4 to 7.3)          | 0.4 (0.2 to 0.7)                   | 4.6 (2.6 to 8)                         |
| Hungary  | Smoking                     | 1.9 (1.4 to 2.5)  | 59.2 (41.7 to 77.8)       | 3.2 (1.9 to 4.8)                   | 62.4 (43.9 to 81.9)                    | 1.4 (1 to 2)      | 40.6 (28.6 to 56.9)       | 3.5 (2.1 to 5.5)                   | 44.1 (30.8 to 61.8)                    |
| Hungary  | Secondhand smoke            | 0.7 (0.2 to 1.3)  | 21.5 (5 to 37)            | 1.2 (0.3 to 2.1)                   | 22.7 (5.3 to 38.9)                     | 0.5 (0.1 to 0.9)  | 13.1 (3.2 to 23.7)        | 1.1 (0.2 to 2.1)                   | 14.2 (3.5 to 25.6)                     |
| Hungary  | Metabolic risks             | 2.7 (1 to 5.1)    | 49.1 (7.1 to 101.9)       | 2.8 (0.5 to 5.9)                   | 51.9 (7.5 to 107.5)                    | 2.9 (1.1 to 5.3)  | 55.4 (15.7 to 108.6)      | 4.7 (1.2 to 9.6)                   | 60.1 (17.3 to 117.8)                   |
| Hungary  | High body-mass index        | 1.4 (0.3 to 2.8)  | 18.7 (-8.8 to 50.1)       | 1.1 (-0.4 to 2.9)                  | 19.8 (-9.3 to 52.5)                    | 1.4 (0.4 to 2.9)  | 23.9 (0.3 to 54.1)        | 1.9 (-0.1 to 4.5)                  | 25.8 (0.2 to 58.9)                     |
| Hungary  | High fasting plasma glucose | 1.5 (0.3 to 3.4)  | 32.6 (6.1 to 74.7)        | 1.8 (0.3 to 4.5)                   | 34.5 (6.5 to 79)                       | 1.6 (0.3 to 3.8)  | 34.5 (6.7 to 81.9)        | 3 (0.6 to 7.3)                     | 37.5 (7.3 to 89)                       |
| Iceland  | All risk factors            | 7.5 (6 to 9.1)    | 196.4 (156.5 to 235.1)    | 19.2 (12.3 to 27.7)                | 215.5 (171.3 to 259.4)                 | 4.5 (3.4 to 5.8)  | 108.6 (82.8 to 138.6)     | 16.2 (10.4 to 23.3)                | 124.8 (94.7 to 159.2)                  |
| Iceland  | Behavioral risks            | 5.9 (4.9 to 6.9)  | 167.5 (137.8 to 197.3)    | 16 (10.4 to 23.2)                  | 183.6 (151.4 to 217.4)                 | 3.3 (2.7 to 4)    | 88.2 (72 to 105.4)        | 12.8 (8.3 to 18.3)                 | 101.1 (81.8 to 122.5)                  |
| Iceland  | Alcohol use                 | 2.2 (1.7 to 2.8)  | 64.8 (48.7 to 81.2)       | 6.1 (3.8 to 9.2)                   | 70.9 (53.7 to 89)                      | 1.6 (1.2 to 2)    | 45.1 (34.8 to 55.6)       | 6.5 (4.1 to 9.4)                   | 51.6 (39.7 to 63.6)                    |
| Iceland  | Diet high in red meat       | 1.5 (0.8 to 2.1)  | 42.2 (20.4 to 59.5)       | 4.1 (1.9 to 6.7)                   | 46.3 (22.2 to 65.6)                    | 0.8 (0.4 to 1.1)  | 21.2 (10.6 to 30.2)       | 3.1 (1.4 to 5)                     | 24.3 (12 to 34.8)                      |
| Iceland  | Low physical activity       | 0.4 (0.1 to 0.8)  | 9.5 (3 to 18.5)           | 1 (0.3 to 2.1)                     | 10.5 (3.4 to 20.3)                     | 0.3 (0.1 to 0.5)  | 5.8 (1.8 to 10.9)         | 0.9 (0.3 to 1.8)                   | 6.7 (2 to 12.7)                        |
| Iceland  | Smoking                     | 1.9 (1.3 to 2.5)  | 53.5 (38.1 to 70.9)       | 5.1 (2.9 to 8)                     | 58.6 (41.7 to 77.4)                    | 0.7 (0.5 to 1)    | 19.5 (13.4 to 26.1)       | 2.9 (1.7 to 4.4)                   | 22.3 (15.7 to 30.3)                    |
| Iceland  | Secondhand smoke            | 0.5 (0.1 to 0.9)  | 15.3 (3.6 to 27.3)        | 1.4 (0.3 to 2.7)                   | 16.7 (3.8 to 29.7)                     | 0.2 (0 to 0.3)    | 5.3 (1.2 to 9.6)          | 0.7 (0.2 to 1.4)                   | 6.1 (1.4 to 10.9)                      |
| Iceland  | Metabolic risks             | 2.1 (0.7 to 3.8)  | 37.8 (7.7 to 76.5)        | 4 (1 to 8.2)                       | 41.9 (8.7 to 83.4)                     | 1.6 (0.6 to 3)    | 26.8 (4.4 to 57.2)        | 4.4 (1 to 8.9)                     | 31.2 (5.7 to 65.7)                     |
| Iceland  | High body-mass index        | 1.2 (0.3 to 2.5)  | 19.1 (-4.2 to 47.1)       | 2.1 (-0.2 to 5)                    | 21.2 (-4.3 to 51.6)                    | 0.7 (0.1 to 1.6)  | 9.2 (-4.9 to 25.7)        | 1.7 (-0.3 to 4.3)                  | 10.9 (-5.1 to 29.5)                    |
| Iceland  | High fasting plasma glucose | 0.9 (0.2 to 2.2)  | 19.9 (3.5 to 47.1)        | 2.1 (0.4 to 5.2)                   | 22 (4 to 52.1)                         | 0.9 (0.2 to 2.1)  | 18.8 (3.5 to 43.8)        | 2.9 (0.5 to 7.1)                   | 21.7 (4.1 to 49.9)                     |
| India    | All risk factors            | 1.3 (0.7 to 2.1)  | 33.1 (17.3 to 54.1)       | 0.9 (0.4 to 1.5)                   | 34 (17.8 to 55.6)                      | 2.1 (1.1 to 3.6)  | 51.8 (24.5 to 91.4)       | 1.8 (0.9 to 3.4)                   | 53.6 (25.7 to 94.6)                    |
| India    | Behavioral risks            | 0.7 (0.4 to 1)    | 19.9 (11 to 29)           | 0.5 (0.3 to 0.8)                   | 20.4 (11.4 to 29.7)                    | 0.8 (0.5 to 1.2)  | 22.9 (12.7 to 34)         | 0.8 (0.4 to 1.2)                   | 23.7 (13.2 to 35)                      |
| India    | Alcohol use                 | 0.1 (0 to 0.1)    | 1.7 (1.1 to 2.4)          | 0 (0 to 0.1)                       | 1.7 (1.1 to 2.5)                       | 0.1 (0.1 to 0.2)  | 3.3 (2 to 4.9)            | 0.1 (0.1 to 0.2)                   | 3.4 (2.1 to 5)                         |
| India    | Diet high in red meat       | 0.1 (0 to 0.1)    | 1.9 (0.9 to 2.6)          | 0 (0 to 0.1)                       | 1.9 (0.9 to 2.6)                       | 0.1 (0 to 0.1)    | 2.3 (1.1 to 3.5)          | 0.1 (0 to 0.1)                     | 2.4 (1.1 to 3.6)                       |

| Location                   | Risk factor                 | 1990               |                           |                                    |                                        | 2019              |                           |                                    |                                        |
|----------------------------|-----------------------------|--------------------|---------------------------|------------------------------------|----------------------------------------|-------------------|---------------------------|------------------------------------|----------------------------------------|
|                            |                             | Deaths             | YLLs (Years of Life Lost) | YLDs (Years Lived with Disability) | DALYs (Disability-Adjusted Life Years) | Deaths            | YLLs (Years of Life Lost) | YLDs (Years Lived with Disability) | DALYs (Disability-Adjusted Life Years) |
| India                      | Low physical activity       | 0.1 (0.1 to 0.3)   | 3.4 (1.7 to 5.9)          | 0.1 (0 to 0.2)                     | 3.5 (1.7 to 6.1)                       | 0.2 (0.1 to 0.3)  | 3.5 (1.8 to 5.9)          | 0.1 (0.1 to 0.2)                   | 3.6 (1.9 to 6.2)                       |
| India                      | Smoking                     | 0.1 (0.1 to 0.1)   | 2.4 (1.4 to 3.7)          | 0.1 (0 to 0.1)                     | 2.5 (1.4 to 3.8)                       | 0.1 (0.1 to 0.2)  | 2.6 (1.5 to 4)            | 0.1 (0 to 0.1)                     | 2.7 (1.5 to 4.1)                       |
| India                      | Secondhand smoke            | 0.4 (0.1 to 0.6)   | 10.9 (2.6 to 19.4)        | 0.3 (0.1 to 0.5)                   | 11.2 (2.7 to 19.9)                     | 0.4 (0.1 to 0.7)  | 11.7 (2.8 to 21.2)        | 0.4 (0.1 to 0.7)                   | 12.1 (2.9 to 21.9)                     |
| India                      | Metabolic risks             | 0.6 (0.2 to 1.4)   | 14.3 (2.3 to 33.3)        | 0.4 (0.1 to 1)                     | 14.7 (2.4 to 34.2)                     | 1.4 (0.4 to 2.9)  | 30.7 (6.5 to 69.7)        | 1.1 (0.3 to 2.6)                   | 31.8 (6.8 to 72)                       |
| India                      | High body-mass index        | 0.1 (0 to 0.2)     | 0.5 (-2.2 to 3.6)         | 0 (0 to 0.1)                       | 0.5 (-2.2 to 3.7)                      | 0.3 (0 to 0.7)    | 4.2 (-3.1 to 12.8)        | 0.2 (-0.1 to 0.5)                  | 4.3 (-3.1 to 13.3)                     |
| India                      | High fasting plasma glucose | 0.6 (0.1 to 1.4)   | 13.9 (2.5 to 32.9)        | 0.4 (0.1 to 0.9)                   | 14.3 (2.5 to 33.9)                     | 1.1 (0.2 to 2.6)  | 27.4 (5.1 to 64.6)        | 1 (0.2 to 2.4)                     | 28.3 (5.3 to 67.2)                     |
| Indonesia                  | All risk factors            | 2.2 (1.2 to 3.5)   | 68.9 (37.2 to 106.4)      | 1.8 (0.9 to 3)                     | 70.7 (38.1 to 109.7)                   | 4.4 (2.4 to 6.9)  | 130.1 (70.1 to 202.3)     | 4.7 (2.4 to 7.7)                   | 134.8 (73.4 to 209.1)                  |
| Indonesia                  | Behavioral risks            | 1.1 (0.5 to 1.7)   | 38.7 (16.5 to 60.9)       | 1 (0.4 to 1.6)                     | 39.7 (16.9 to 62.7)                    | 1.4 (0.7 to 2.2)  | 46.4 (21 to 74.5)         | 1.6 (0.7 to 2.8)                   | 48.1 (21.8 to 76.7)                    |
| Indonesia                  | Alcohol use                 | 0 (0 to 0.1)       | 1.1 (0.3 to 2.1)          | 0 (0 to 0.1)                       | 1.1 (0.3 to 2.1)                       | 0 (0 to 0.1)      | 1.3 (0.3 to 2.6)          | 0 (0 to 0.1)                       | 1.3 (0.3 to 2.7)                       |
| Indonesia                  | Diet high in red meat       | 0.1 (0 to 0.2)     | 5.2 (1.4 to 7.7)          | 0.1 (0 to 0.2)                     | 5.3 (1.5 to 7.9)                       | 0.2 (0.1 to 0.3)  | 6.5 (1.6 to 10.4)         | 0.2 (0.1 to 0.4)                   | 6.8 (1.7 to 10.7)                      |
| Indonesia                  | Low physical activity       | 0.1 (0.1 to 0.2)   | 3.2 (1.9 to 6.3)          | 0.1 (0 to 0.2)                     | 3.3 (1.9 to 6.5)                       | 0.1 (0.1 to 0.3)  | 3.8 (2 to 7.3)            | 0.1 (0.1 to 0.3)                   | 4 (2.1 to 7.6)                         |
| Indonesia                  | Smoking                     | 0.1 (0.1 to 0.2)   | 2.8 (1.4 to 4.7)          | 0.1 (0 to 0.1)                     | 2.9 (1.4 to 4.8)                       | 0.2 (0.1 to 0.3)  | 4.2 (2.2 to 6.7)          | 0.2 (0.1 to 0.3)                   | 4.3 (2.3 to 6.9)                       |
| Indonesia                  | Secondhand smoke            | 0.7 (0.2 to 1.3)   | 27 (6.3 to 48.1)          | 0.7 (0.2 to 1.2)                   | 27.7 (6.5 to 49.2)                     | 0.9 (0.2 to 1.6)  | 31.4 (7.5 to 56.9)        | 1.1 (0.3 to 2.1)                   | 32.5 (7.8 to 58.1)                     |
| Indonesia                  | Metabolic risks             | 1.2 (0.3 to 2.4)   | 32.3 (9.4 to 64.6)        | 0.9 (0.3 to 1.9)                   | 33.2 (9.6 to 66.3)                     | 3.3 (1.4 to 5.7)  | 89.9 (36.7 to 156.1)      | 3.3 (1.3 to 5.8)                   | 93.2 (38.4 to 160.8)                   |
| Indonesia                  | High body-mass index        | 0.7 (0.1 to 1.6)   | 18 (3.3 to 44.2)          | 0.5 (0.1 to 1.3)                   | 18.5 (3.4 to 45.3)                     | 2.4 (0.7 to 4.6)  | 66.7 (20.9 to 127.8)      | 2.4 (0.8 to 4.7)                   | 69.1 (21.6 to 132.3)                   |
| Indonesia                  | High fasting plasma glucose | 0.5 (0.1 to 1.3)   | 15 (2.7 to 36.3)          | 0.4 (0.1 to 1)                     | 15.4 (2.8 to 37.1)                     | 1 (0.2 to 2.4)    | 27 (4.7 to 64.7)          | 1 (0.2 to 2.5)                     | 27.9 (4.9 to 66.8)                     |
| Iran (Islamic Republic of) | All risk factors            | 1.5 (0.8 to 2.6)   | 36.5 (18.6 to 61.6)       | 1.6 (0.8 to 2.8)                   | 38 (19.4 to 63.7)                      | 2.3 (1.3 to 3.7)  | 52.1 (25.8 to 85.9)       | 3.4 (1.6 to 5.9)                   | 55.4 (27.5 to 91)                      |
| Iran (Islamic Republic of) | Behavioral risks            | 0.8 (0.5 to 1.2)   | 23.6 (14.1 to 34.7)       | 1 (0.5 to 1.5)                     | 24.6 (14.8 to 36.2)                    | 0.9 (0.6 to 1.3)  | 26.6 (17.1 to 36.3)       | 1.7 (1 to 2.7)                     | 28.4 (18.1 to 39)                      |
| Iran (Islamic Republic of) | Alcohol use                 | 0 (0 to 0)         | 0.3 (0.2 to 0.5)          | 0 (0 to 0)                         | 0.3 (0.2 to 0.5)                       | 0 (0 to 0.1)      | 1.2 (0.9 to 1.7)          | 0.1 (0 to 0.1)                     | 1.3 (0.9 to 1.8)                       |
| Iran (Islamic Republic of) | Diet high in red meat       | 0.2 (0 to 0.3)     | 6.7 (1.5 to 10.2)         | 0.3 (0.1 to 0.5)                   | 6.9 (1.6 to 10.6)                      | 0.2 (0 to 0.3)    | 6.3 (1.4 to 8.9)          | 0.4 (0.1 to 0.7)                   | 6.7 (1.5 to 9.5)                       |
| Iran (Islamic Republic of) | Low physical activity       | 0.2 (0.1 to 0.4)   | 4.4 (1.7 to 8.5)          | 0.2 (0.1 to 0.4)                   | 4.6 (1.7 to 8.8)                       | 0.2 (0.1 to 0.4)  | 5.4 (2.1 to 10)           | 0.4 (0.1 to 0.7)                   | 5.8 (2.3 to 10.7)                      |
| Iran (Islamic Republic of) | Smoking                     | 0.1 (0.1 to 0.2)   | 3.8 (2 to 6)              | 0.2 (0.1 to 0.3)                   | 3.9 (2.1 to 6.3)                       | 0.1 (0.1 to 0.2)  | 3.9 (2.4 to 5.4)          | 0.2 (0.1 to 0.4)                   | 4.1 (2.6 to 5.8)                       |
| Iran (Islamic Republic of) | Secondhand smoke            | 0.3 (0.1 to 0.5)   | 9.2 (2.2 to 16.2)         | 0.4 (0.1 to 0.7)                   | 9.5 (2.3 to 16.9)                      | 0.3 (0.1 to 0.6)  | 10.6 (2.5 to 18.6)        | 0.7 (0.2 to 1.3)                   | 11.3 (2.6 to 19.7)                     |
| Iran (Islamic Republic of) | Metabolic risks             | 0.8 (0.2 to 1.7)   | 14.1 (-1.2 to 36.4)       | 0.7 (0 to 1.6)                     | 14.7 (-1.1 to 37.7)                    | 1.5 (0.5 to 2.9)  | 27.8 (2.1 to 61.3)        | 1.8 (0.1 to 4.2)                   | 29.6 (2.2 to 65.7)                     |
| Iran (Islamic Republic of) | High body-mass index        | 0.3 (0 to 0.7)     | 2.2 (-6.8 to 11.9)        | 0.1 (-0.2 to 0.6)                  | 2.3 (-7.1 to 12.3)                     | 0.5 (0 to 1)      | 3.1 (-10.6 to 15.8)       | 0.1 (-0.8 to 1)                    | 3.2 (-11.3 to 16.5)                    |
| Iran (Islamic Republic of) | High fasting plasma glucose | 0.5 (0.1 to 1.3)   | 12.4 (2.1 to 30.7)        | 0.5 (0.1 to 1.4)                   | 12.9 (2.2 to 32.2)                     | 1.1 (0.2 to 2.4)  | 26.3 (5.2 to 58.1)        | 1.8 (0.3 to 4.2)                   | 28.1 (5.5 to 61)                       |
| Iraq                       | All risk factors            | 3 (1.4 to 5.1)     | 76.3 (32.9 to 137.4)      | 2.6 (1.1 to 4.7)                   | 78.9 (34 to 142.3)                     | 4.4 (2.2 to 7.6)  | 108.9 (46.4 to 202.2)     | 5.3 (2.2 to 9.9)                   | 114.2 (49.7 to 211.6)                  |
| Iraq                       | Behavioral risks            | 1.5 (0.9 to 2.3)   | 47.9 (28 to 72.9)         | 1.5 (0.8 to 2.6)                   | 49.5 (29.2 to 75.1)                    | 1.8 (1.1 to 2.6)  | 53.3 (30.3 to 82.1)       | 2.6 (1.4 to 4.3)                   | 55.9 (31.8 to 85.6)                    |
| Iraq                       | Alcohol use                 | 0.2 (0.1 to 0.2)   | 5.4 (3.3 to 8.5)          | 0.2 (0.1 to 0.3)                   | 5.6 (3.4 to 8.8)                       | 0.1 (0.1 to 0.2)  | 3.3 (1.8 to 5.3)          | 0.2 (0.1 to 0.3)                   | 3.4 (1.9 to 5.6)                       |
| Iraq                       | Diet high in red meat       | 0.2 (0 to 0.4)     | 7.4 (1.5 to 12.1)         | 0.2 (0 to 0.4)                     | 7.6 (1.5 to 12.5)                      | 0.2 (0 to 0.3)    | 6.5 (1.5 to 10.9)         | 0.3 (0.1 to 0.6)                   | 6.9 (1.6 to 11.4)                      |
| Iraq                       | Low physical activity       | 0.3 (0.1 to 0.6)   | 9 (3.1 to 17.3)           | 0.3 (0.1 to 0.6)                   | 9.3 (3.2 to 18)                        | 0.5 (0.2 to 0.8)  | 12.1 (4.5 to 22.4)        | 0.6 (0.2 to 1.3)                   | 12.8 (4.8 to 23.4)                     |
| Iraq                       | Smoking                     | 0.3 (0.2 to 0.5)   | 7.7 (4.3 to 12.5)         | 0.3 (0.1 to 0.4)                   | 7.9 (4.5 to 12.9)                      | 0.3 (0.2 to 0.5)  | 8.6 (5.4 to 13.4)         | 0.4 (0.2 to 0.7)                   | 9.1 (5.7 to 14)                        |
| Iraq                       | Secondhand smoke            | 0.6 (0.1 to 1.1)   | 20.1 (4.7 to 37.6)        | 0.6 (0.1 to 1.2)                   | 20.7 (4.8 to 38.5)                     | 0.7 (0.2 to 1.4)  | 24.3 (6 to 46.2)          | 1.2 (0.3 to 2.3)                   | 25.4 (6.3 to 48.3)                     |
| Iraq                       | Metabolic risks             | 1.6 (0.3 to 3.5)   | 31.7 (-7.8 to 87.2)       | 1.2 (-0.1 to 3)                    | 32.9 (-7.8 to 89.9)                    | 2.9 (0.8 to 6)    | 61.4 (1.9 to 147.8)       | 3 (0 to 7.3)                       | 64.4 (1.9 to 155)                      |
| Iraq                       | High body-mass index        | 0.4 (-0.3 to 1.3)  | -0.9 (-24.7 to 21.2)      | 0.1 (-0.7 to 0.8)                  | -0.8 (-25.2 to 21.9)                   | 0.7 (-0.2 to 1.9) | 2.9 (-26.4 to 30.4)       | 0.1 (-1.3 to 1.4)                  | 3 (-27.6 to 31.8)                      |
| Iraq                       | High fasting plasma glucose | 1.2 (0.2 to 3)     | 34 (6.2 to 83.6)          | 1.1 (0.2 to 2.9)                   | 35.2 (6.4 to 86.3)                     | 2.3 (0.5 to 5.4)  | 61.8 (12.1 to 145.1)      | 3.1 (0.6 to 7.6)                   | 64.8 (12.8 to 153.5)                   |
| Ireland                    | All risk factors            | 10.9 (9.2 to 12.7) | 296.7 (250.9 to 344.6)    | 22.5 (15.3 to 31.1)                | 319.2 (269.2 to 372.1)                 | 7.2 (5.7 to 9.1)  | 170.7 (136.4 to 210.5)    | 24.5 (15.6 to 37.3)                | 195.2 (155.1 to 243.2)                 |
| Ireland                    | Behavioral risks            | 9.5 (8.1 to 10.8)  | 271.3 (232.9 to 308.4)    | 20.4 (13.9 to 28.5)                | 291.7 (249.3 to 332.7)                 | 5.4 (4.5 to 6.5)  | 139.3 (116.2 to 164.7)    | 19.9 (12.5 to 30)                  | 159.2 (131 to 188.8)                   |
| Ireland                    | Alcohol use                 | 4.2 (3.4 to 5)     | 126.8 (103.1 to 151.5)    | 9.4 (6.3 to 13.3)                  | 136.3 (110.5 to 162.9)                 | 2.5 (1.9 to 3.1)  | 67.1 (52.4 to 82.9)       | 9.5 (5.8 to 15)                    | 76.6 (59.1 to 95.3)                    |

| Location | Risk factor                 | 1990              |                           |                                    |                                        | 2019              |                           |                                    |                                        |
|----------|-----------------------------|-------------------|---------------------------|------------------------------------|----------------------------------------|-------------------|---------------------------|------------------------------------|----------------------------------------|
|          |                             | Deaths            | YLLs (Years of Life Lost) | YLDs (Years Lived with Disability) | DALYs (Disability-Adjusted Life Years) | Deaths            | YLLs (Years of Life Lost) | YLDs (Years Lived with Disability) | DALYs (Disability-Adjusted Life Years) |
| Ireland  | Diet high in red meat       | 1.9 (1 to 2.6)    | 53.9 (26.6 to 73.9)       | 4.1 (1.9 to 6.4)                   | 58 (28.8 to 80.1)                      | 1.3 (0.6 to 1.8)  | 32 (15.7 to 47.5)         | 4.6 (2.1 to 8.2)                   | 36.6 (18.1 to 54.6)                    |
| Ireland  | Low physical activity       | 0.8 (0.3 to 1.4)  | 19.4 (6.2 to 34.5)        | 1.5 (0.5 to 2.9)                   | 20.9 (6.7 to 37)                       | 0.6 (0.2 to 1)    | 12.2 (4 to 21.1)          | 1.8 (0.6 to 3.4)                   | 13.9 (4.6 to 24.4)                     |
| Ireland  | Smoking                     | 3.1 (2.2 to 4)    | 85.1 (61.5 to 109)        | 6.4 (3.9 to 9.5)                   | 91.6 (65.9 to 117.4)                   | 1.4 (1 to 1.9)    | 36.4 (26.2 to 47.4)       | 5.2 (3 to 8.3)                     | 41.6 (29.8 to 54.8)                    |
| Ireland  | Secondhand smoke            | 0.7 (0.2 to 1.2)  | 21 (5 to 36.1)            | 1.5 (0.3 to 2.8)                   | 22.5 (5.2 to 39.2)                     | 0.3 (0.1 to 0.5)  | 7.9 (1.9 to 13.7)         | 1.1 (0.2 to 2.1)                   | 9 (2.2 to 16)                          |
| Ireland  | Metabolic risks             | 2 (0.7 to 3.8)    | 35.6 (3 to 75.7)          | 2.9 (0.3 to 6)                     | 38.5 (3.5 to 81.6)                     | 2.4 (1 to 4.5)    | 42.9 (12.6 to 84.3)       | 6.3 (1.6 to 12.7)                  | 49.1 (14.2 to 95.1)                    |
| Ireland  | High body-mass index        | 1.2 (0.2 to 2.6)  | 18.4 (-7.9 to 48)         | 1.6 (-0.5 to 4)                    | 20 (-8.5 to 51.5)                      | 1.1 (0.3 to 2.3)  | 17.2 (-1.6 to 40.2)       | 2.5 (-0.2 to 6)                    | 19.7 (-1.9 to 46.6)                    |
| Ireland  | High fasting plasma glucose | 0.8 (0.1 to 1.9)  | 18 (3.2 to 42.2)          | 1.4 (0.2 to 3.6)                   | 19.4 (3.5 to 45.8)                     | 1.4 (0.3 to 3.2)  | 27.5 (5.3 to 63.5)        | 4 (0.7 to 10.2)                    | 31.5 (6.1 to 72.8)                     |
| Israel   | All risk factors            | 7.3 (5.2 to 9.7)  | 182.3 (131.1 to 234)      | 12.2 (7.6 to 18.1)                 | 194.5 (139.7 to 249.2)                 | 5.5 (3.8 to 7.7)  | 123 (87 to 165.8)         | 14 (8.5 to 22.3)                   | 137.1 (96.5 to 184.5)                  |
| Israel   | Behavioral risks            | 4.8 (3.8 to 5.8)  | 140.4 (109.4 to 168.9)    | 9 (5.7 to 13)                      | 149.4 (115.7 to 180)                   | 3.1 (2.4 to 3.7)  | 82.1 (64.2 to 98.7)       | 9.2 (5.5 to 13.7)                  | 91.3 (71 to 110.3)                     |
| Israel   | Alcohol use                 | 0.9 (0.6 to 1.3)  | 29.8 (19.6 to 40.8)       | 1.9 (1.1 to 3)                     | 31.7 (20.7 to 43.3)                    | 0.8 (0.6 to 1.1)  | 24.2 (16.8 to 32.4)       | 2.7 (1.5 to 4.3)                   | 26.9 (18.6 to 36)                      |
| Israel   | Diet high in red meat       | 0.9 (0.2 to 1.2)  | 25 (7.4 to 32.7)          | 1.6 (0.5 to 2.5)                   | 26.6 (7.9 to 35)                       | 0.8 (0.3 to 1.1)  | 20.3 (7.9 to 27.4)        | 2.3 (0.8 to 3.8)                   | 22.6 (8.7 to 30.5)                     |
| Israel   | Low physical activity       | 0.5 (0.2 to 1)    | 11.7 (3.8 to 23.3)        | 0.8 (0.3 to 1.7)                   | 12.5 (4.1 to 24.8)                     | 0.4 (0.1 to 0.8)  | 8.3 (2.7 to 15.6)         | 1 (0.3 to 2)                       | 9.3 (3 to 17.6)                        |
| Israel   | Smoking                     | 2.2 (1.5 to 2.9)  | 63.6 (44.1 to 84.9)       | 4.1 (2.4 to 6.3)                   | 67.7 (47.5 to 90.3)                    | 1 (0.7 to 1.3)    | 25.1 (18 to 33.2)         | 2.9 (1.6 to 4.6)                   | 27.9 (19.9 to 37.1)                    |
| Israel   | Secondhand smoke            | 0.6 (0.1 to 1)    | 19.6 (4.5 to 33.9)        | 1.2 (0.2 to 2.3)                   | 20.8 (4.9 to 36.1)                     | 0.3 (0.1 to 0.6)  | 9.6 (2.3 to 17)           | 1.1 (0.2 to 2.1)                   | 10.7 (2.6 to 18.8)                     |
| Israel   | Metabolic risks             | 2.9 (1 to 5.5)    | 49.5 (8.4 to 103)         | 3.7 (0.8 to 7.7)                   | 53.2 (9.3 to 110.5)                    | 2.8 (1.1 to 5.2)  | 48 (12.6 to 93.4)         | 5.6 (1.5 to 11.7)                  | 53.7 (14 to 104.5)                     |
| Israel   | High body-mass index        | 1.3 (0.2 to 2.8)  | 17.1 (-8.6 to 45.8)       | 1.4 (-0.4 to 3.4)                  | 18.5 (-8.9 to 48.9)                    | 1.2 (0.3 to 2.5)  | 16.6 (-2.8 to 39.8)       | 2 (-0.2 to 4.8)                    | 18.6 (-3.1 to 44.6)                    |
| Israel   | High fasting plasma glucose | 1.7 (0.3 to 3.8)  | 34.4 (6.4 to 77.9)        | 2.5 (0.5 to 6)                     | 36.8 (6.9 to 84.2)                     | 1.8 (0.3 to 3.9)  | 33.8 (6.6 to 75.3)        | 4 (0.7 to 9.7)                     | 37.7 (7.4 to 83.9)                     |
| Italy    | All risk factors            | 8.6 (6.9 to 10.5) | 230.8 (189.5 to 274.1)    | 21.4 (14.1 to 30.1)                | 252.2 (206.1 to 301.7)                 | 5.9 (4.5 to 7.7)  | 140.8 (108.2 to 177.1)    | 21.1 (13.1 to 32)                  | 161.8 (124.8 to 204.3)                 |
| Italy    | Behavioral risks            | 6.7 (5.7 to 7.7)  | 194.3 (165.4 to 223.8)    | 17.9 (12 to 25.2)                  | 212.1 (179.5 to 243.3)                 | 4 (3.3 to 4.7)    | 106.7 (88.6 to 124)       | 15.9 (9.9 to 23.8)                 | 122.7 (101.8 to 143.4)                 |
| Italy    | Alcohol use                 | 3.4 (2.7 to 4.2)  | 100.1 (79.3 to 123.8)     | 9.2 (5.9 to 13.5)                  | 109.3 (86.5 to 135.2)                  | 1.7 (1.3 to 2.2)  | 47.3 (37.1 to 59.6)       | 7.1 (4.3 to 10.9)                  | 54.4 (42.1 to 68.8)                    |
| Italy    | Diet high in red meat       | 1.3 (0.7 to 1.8)  | 38.5 (19.8 to 51.8)       | 3.6 (1.7 to 5.6)                   | 42.1 (21.3 to 56.5)                    | 0.9 (0.4 to 1.2)  | 23.2 (11.5 to 31.5)       | 3.5 (1.5 to 5.7)                   | 26.7 (13.3 to 36.4)                    |
| Italy    | Low physical activity       | 0.5 (0.2 to 0.9)  | 12.3 (3.8 to 23.2)        | 1.2 (0.4 to 2.5)                   | 13.5 (4.3 to 25.1)                     | 0.4 (0.1 to 0.7)  | 8 (2.6 to 14.9)           | 1.2 (0.4 to 2.6)                   | 9.2 (3 to 17)                          |
| Italy    | Smoking                     | 1.6 (1.1 to 2)    | 46.4 (33.1 to 60.1)       | 4.3 (2.5 to 6.4)                   | 50.7 (36 to 66.3)                      | 1.1 (0.8 to 1.4)  | 29.2 (21.3 to 37.3)       | 4.4 (2.5 to 6.7)                   | 33.5 (24.4 to 43.4)                    |
| Italy    | Secondhand smoke            | 0.6 (0.1 to 1)    | 18.7 (4.3 to 32.8)        | 1.7 (0.4 to 3.1)                   | 20.4 (4.7 to 35.6)                     | 0.3 (0.1 to 0.5)  | 9.5 (2.3 to 16.5)         | 1.4 (0.3 to 2.7)                   | 10.9 (2.6 to 18.8)                     |
| Italy    | Metabolic risks             | 2.5 (0.9 to 4.7)  | 48.9 (12.8 to 97.8)       | 4.7 (1.3 to 9.5)                   | 53.6 (14.4 to 105.5)                   | 2.4 (0.9 to 4.4)  | 43.6 (13.4 to 85.2)       | 6.6 (1.8 to 13.7)                  | 50.2 (15.5 to 97.9)                    |
| Italy    | High body-mass index        | 1 (0.2 to 2.1)    | 15.6 (-1.7 to 37.9)       | 1.5 (-0.1 to 3.7)                  | 17.2 (-1.8 to 41.6)                    | 0.9 (0.2 to 1.8)  | 13.9 (0.2 to 31.5)        | 2.1 (0 to 4.8)                     | 16 (0.2 to 35.6)                       |
| Italy    | High fasting plasma glucose | 1.6 (0.3 to 3.6)  | 35 (6.6 to 78.2)          | 3.4 (0.6 to 8)                     | 38.4 (7.2 to 86)                       | 1.6 (0.3 to 3.5)  | 31.6 (6.2 to 69.5)        | 4.8 (0.9 to 11.7)                  | 36.3 (7.1 to 80)                       |
| Jamaica  | All risk factors            | 4.3 (2.8 to 6.2)  | 106.7 (68.6 to 153.4)     | 5.2 (3 to 8.3)                     | 111.9 (72.1 to 161.6)                  | 7 (4.1 to 11.2)   | 169.4 (92.6 to 278)       | 9.9 (5 to 16.9)                    | 179.3 (98.3 to 292.5)                  |
| Jamaica  | Behavioral risks            | 2.3 (1.8 to 2.9)  | 68.6 (52.5 to 84.3)       | 3.1 (2.1 to 4.4)                   | 71.7 (54.5 to 88.7)                    | 3.4 (2.4 to 4.5)  | 101.7 (70.9 to 137.9)     | 5.6 (3.4 to 8.4)                   | 107.3 (74.8 to 144.5)                  |
| Jamaica  | Alcohol use                 | 0.7 (0.5 to 1)    | 24.3 (17.9 to 31.6)       | 1.1 (0.7 to 1.6)                   | 25.4 (18.7 to 33)                      | 1.2 (0.8 to 1.7)  | 41.9 (27.7 to 59)         | 2.2 (1.3 to 3.5)                   | 44.2 (29.4 to 62.1)                    |
| Jamaica  | Diet high in red meat       | 0.4 (0.1 to 0.5)  | 10.9 (2.1 to 14.8)        | 0.5 (0.1 to 0.8)                   | 11.4 (2.2 to 15.4)                     | 0.5 (0.1 to 0.7)  | 14.6 (2.7 to 23.1)        | 0.8 (0.1 to 1.4)                   | 15.4 (2.9 to 24.5)                     |
| Jamaica  | Low physical activity       | 0.4 (0.1 to 0.7)  | 9.3 (3 to 17.3)           | 0.5 (0.1 to 0.9)                   | 9.7 (3.2 to 18.2)                      | 0.6 (0.2 to 1.2)  | 15.7 (4.9 to 30)          | 0.9 (0.3 to 1.9)                   | 16.6 (5.2 to 31.9)                     |
| Jamaica  | Smoking                     | 0.6 (0.4 to 0.8)  | 15.5 (10.1 to 21.9)       | 0.7 (0.4 to 1.1)                   | 16.2 (10.5 to 22.9)                    | 0.7 (0.4 to 1)    | 18.1 (11.5 to 27.1)       | 1 (0.6 to 1.7)                     | 19.1 (12.1 to 28.7)                    |
| Jamaica  | Secondhand smoke            | 0.4 (0.1 to 0.7)  | 11.9 (2.8 to 20.6)        | 0.5 (0.1 to 1)                     | 12.5 (2.9 to 21.5)                     | 0.5 (0.1 to 0.9)  | 16.1 (3.8 to 30.1)        | 0.9 (0.2 to 1.7)                   | 17 (4 to 31.7)                         |
| Jamaica  | Metabolic risks             | 2.2 (0.7 to 4.3)  | 43.3 (7 to 92.4)          | 2.3 (0.5 to 5)                     | 45.7 (7.6 to 97.6)                     | 4.1 (1.1 to 8.5)  | 76.5 (-1.1 to 184.4)      | 4.9 (0.4 to 11.6)                  | 81.4 (-0.7 to 194.4)                   |
| Jamaica  | High body-mass index        | 0.7 (0 to 1.7)    | 9.1 (-9.5 to 29.8)        | 0.6 (-0.3 to 1.8)                  | 9.7 (-10 to 30.9)                      | 1.1 (-0.3 to 2.8) | 2.6 (-39.9 to 38.4)       | 0.6 (-1.6 to 2.7)                  | 3.1 (-41.8 to 40.9)                    |
| Jamaica  | High fasting plasma glucose | 1.6 (0.3 to 3.4)  | 36.1 (6.8 to 80.5)        | 1.8 (0.3 to 4.4)                   | 37.9 (7.2 to 83.9)                     | 3.2 (0.7 to 7.3)  | 78.5 (15.6 to 180.4)      | 4.6 (0.9 to 11.2)                  | 83 (16.5 to 189.6)                     |
| Japan    | All risk factors            | 2.2 (1.7 to 2.6)  | 66.4 (53.8 to 78.2)       | 7.2 (4.6 to 10.2)                  | 73.5 (59.7 to 86.6)                    | 2.4 (1.9 to 3.1)  | 70.1 (55.9 to 85.6)       | 11.3 (7 to 17.1)                   | 81.4 (64.2 to 99.6)                    |
| Japan    | Behavioral risks            | 1.8 (1.5 to 2.1)  | 59.8 (50.2 to 69.5)       | 6.3 (4.2 to 9.1)                   | 66.1 (55.5 to 76.8)                    | 1.9 (1.6 to 2.3)  | 59.6 (49.7 to 70.1)       | 9.5 (5.9 to 14.3)                  | 69.1 (57 to 81.8)                      |

| Location   | Risk factor                 | 1990              |                           |                                    |                                        | 2019               |                           |                                    |                                        |
|------------|-----------------------------|-------------------|---------------------------|------------------------------------|----------------------------------------|--------------------|---------------------------|------------------------------------|----------------------------------------|
|            |                             | Deaths            | YLLs (Years of Life Lost) | YLDs (Years Lived with Disability) | DALYs (Disability-Adjusted Life Years) | Deaths             | YLLs (Years of Life Lost) | YLDs (Years Lived with Disability) | DALYs (Disability-Adjusted Life Years) |
| Japan      | Alcohol use                 | 1.1 (0.9 to 1.3)  | 36.8 (29.9 to 43.6)       | 3.8 (2.4 to 5.6)                   | 40.7 (33 to 48.4)                      | 1.1 (0.9 to 1.4)   | 36.5 (28.5 to 44.5)       | 5.8 (3.6 to 8.9)                   | 42.3 (32.9 to 52.2)                    |
| Japan      | Diet high in red meat       | 0.2 (0.1 to 0.3)  | 7 (2 to 9.1)              | 0.7 (0.2 to 1.2)                   | 7.7 (2.3 to 10.1)                      | 0.3 (0.1 to 0.3)   | 7.8 (2.4 to 10.5)         | 1.2 (0.4 to 2.1)                   | 9 (2.9 to 12.3)                        |
| Japan      | Low physical activity       | 0.1 (0 to 0.2)    | 2.5 (1 to 5.3)            | 0.3 (0.1 to 0.7)                   | 2.8 (1.1 to 6)                         | 0.1 (0 to 0.2)     | 2.9 (1.1 to 6.1)          | 0.5 (0.2 to 1.2)                   | 3.4 (1.3 to 7.4)                       |
| Japan      | Smoking                     | 0.3 (0.2 to 0.4)  | 9.8 (6.8 to 13)           | 1.1 (0.6 to 1.6)                   | 10.9 (7.5 to 14.4)                     | 0.3 (0.2 to 0.4)   | 9.8 (6.8 to 13)           | 1.6 (0.9 to 2.5)                   | 11.4 (7.9 to 15.2)                     |
| Japan      | Secondhand smoke            | 0.2 (0.1 to 0.4)  | 8.3 (1.9 to 14.2)         | 0.8 (0.2 to 1.6)                   | 9.1 (2.1 to 15.8)                      | 0.2 (0.1 to 0.4)   | 6.9 (1.7 to 11.9)         | 1.1 (0.2 to 2.1)                   | 8 (1.9 to 13.6)                        |
| Japan      | Metabolic risks             | 0.4 (0.1 to 0.9)  | 8.2 (0.6 to 19.1)         | 1.1 (0.2 to 2.4)                   | 9.2 (0.7 to 21.1)                      | 0.6 (0.2 to 1.2)   | 12.9 (2.9 to 27.8)        | 2.2 (0.5 to 5)                     | 15.1 (3.5 to 32.1)                     |
| Japan      | High body-mass index        | 0.1 (0 to 0.3)    | 1.1 (-2.8 to 4.9)         | 0.2 (-0.2 to 0.6)                  | 1.3 (-3 to 5.5)                        | 0.2 (0 to 0.5)     | 3.3 (-0.9 to 9.1)         | 0.6 (-0.1 to 1.6)                  | 3.8 (-1 to 10.5)                       |
| Japan      | High fasting plasma glucose | 0.3 (0.1 to 0.7)  | 7.2 (1.3 to 16.8)         | 0.9 (0.2 to 2.2)                   | 8.1 (1.5 to 19.1)                      | 0.4 (0.1 to 1)     | 9.8 (1.8 to 22.9)         | 1.7 (0.3 to 4.3)                   | 11.5 (2.1 to 27.1)                     |
| Jordan     | All risk factors            | 4.1 (2.3 to 6.7)  | 100.1 (51.6 to 163.3)     | 3.7 (1.8 to 6.5)                   | 103.8 (53.4 to 170.2)                  | 4.8 (2.7 to 7.5)   | 103.2 (54.6 to 167.7)     | 6.5 (3 to 11.4)                    | 109.7 (57.5 to 177.8)                  |
| Jordan     | Behavioral risks            | 2.1 (1.3 to 3)    | 62.4 (37.8 to 89.6)       | 2.2 (1.2 to 3.5)                   | 64.7 (39.2 to 92.6)                    | 2 (1.3 to 2.8)     | 53.3 (33.3 to 76.4)       | 3.4 (1.9 to 5.3)                   | 56.7 (35.4 to 81.9)                    |
| Jordan     | Alcohol use                 | 0.1 (0 to 0.1)    | 2.5 (1.4 to 4)            | 0.1 (0 to 0.2)                     | 2.6 (1.4 to 4.2)                       | 0.1 (0 to 0.1)     | 2.7 (1.4 to 4.3)          | 0.2 (0.1 to 0.3)                   | 2.8 (1.5 to 4.6)                       |
| Jordan     | Diet high in red meat       | 0.4 (0.1 to 0.6)  | 12.8 (2.5 to 19.5)        | 0.4 (0.1 to 0.8)                   | 13.2 (2.6 to 20.2)                     | 0.4 (0.1 to 0.6)   | 10.7 (2.2 to 16.9)        | 0.7 (0.1 to 1.2)                   | 11.4 (2.3 to 18)                       |
| Jordan     | Low physical activity       | 0.3 (0.1 to 0.6)  | 7.5 (3.2 to 14.3)         | 0.3 (0.1 to 0.6)                   | 7.8 (3.4 to 15)                        | 0.4 (0.2 to 0.7)   | 8.6 (3.3 to 16.1)         | 0.6 (0.2 to 1.1)                   | 9.2 (3.6 to 17.2)                      |
| Jordan     | Smoking                     | 0.6 (0.3 to 0.8)  | 15.8 (9.2 to 24.4)        | 0.6 (0.3 to 0.9)                   | 16.3 (9.6 to 25.2)                     | 0.5 (0.3 to 0.7)   | 12.6 (7.4 to 18.5)        | 0.8 (0.4 to 1.2)                   | 13.3 (7.9 to 19.6)                     |
| Jordan     | Secondhand smoke            | 0.8 (0.2 to 1.4)  | 26.2 (6.2 to 46.2)        | 0.9 (0.2 to 1.7)                   | 27.1 (6.3 to 47.9)                     | 0.7 (0.2 to 1.2)   | 20.8 (4.6 to 37.6)        | 1.3 (0.3 to 2.5)                   | 22.1 (5 to 39.9)                       |
| Jordan     | Metabolic risks             | 2.3 (0.6 to 4.6)  | 42.4 (-1.1 to 99.4)       | 1.7 (0.1 to 3.9)                   | 44.1 (-1.1 to 103.3)                   | 3.1 (1.1 to 5.8)   | 56 (8 to 116.3)           | 3.5 (0.4 to 7.5)                   | 59.5 (8.4 to 122.7)                    |
| Jordan     | High body-mass index        | 0.9 (-0.1 to 2.1) | 8.5 (-19.1 to 38.8)       | 0.4 (-0.6 to 1.5)                  | 8.9 (-19.8 to 40.3)                    | 1.4 (0.1 to 2.8)   | 16.3 (-15.3 to 46.2)      | 0.9 (-1.1 to 2.9)                  | 17.2 (-16.2 to 49.2)                   |
| Jordan     | High fasting plasma glucose | 1.5 (0.3 to 3.5)  | 36.5 (6.6 to 85.9)        | 1.4 (0.3 to 3.4)                   | 37.9 (6.9 to 89.4)                     | 2 (0.4 to 4.4)     | 44 (8.7 to 99.7)          | 2.9 (0.5 to 6.7)                   | 46.8 (9.2 to 105.7)                    |
| Kazakhstan | All risk factors            | 4.9 (3.5 to 6.3)  | 139.6 (100 to 179.7)      | 5.6 (3.5 to 8.1)                   | 145.2 (103.9 to 185.8)                 | 4.8 (3.1 to 6.8)   | 123.4 (80.4 to 175.5)     | 7.1 (4.2 to 10.9)                  | 130.6 (85.5 to 184.9)                  |
| Kazakhstan | Behavioral risks            | 3.4 (2.6 to 4.2)  | 110.1 (85.8 to 135.5)     | 4.3 (2.7 to 6.2)                   | 114.4 (89.5 to 140.3)                  | 2.7 (2 to 3.4)     | 79.9 (59.1 to 101.8)      | 4.6 (2.9 to 6.8)                   | 84.4 (62.5 to 107.9)                   |
| Kazakhstan | Alcohol use                 | 1.6 (1.1 to 2.1)  | 53.9 (38.9 to 71.2)       | 2.1 (1.2 to 3.2)                   | 56 (40.3 to 74.3)                      | 1.1 (0.8 to 1.4)   | 34.4 (24.3 to 46.7)       | 2 (1.2 to 3.1)                     | 36.4 (25.3 to 49.5)                    |
| Kazakhstan | Diet high in red meat       | 1 (0.5 to 1.4)    | 32.1 (15.6 to 44.1)       | 1.3 (0.6 to 2)                     | 33.3 (16.4 to 45.9)                    | 0.9 (0.4 to 1.3)   | 25.7 (12.8 to 37.5)       | 1.5 (0.7 to 2.4)                   | 27.2 (13.5 to 39.6)                    |
| Kazakhstan | Low physical activity       | 0.2 (0.1 to 0.3)  | 4 (2.4 to 7)              | 0.2 (0.1 to 0.3)                   | 4.2 (2.5 to 7.3)                       | 0.2 (0.1 to 0.3)   | 3.9 (2.2 to 6.7)          | 0.2 (0.1 to 0.4)                   | 4.1 (2.3 to 7.1)                       |
| Kazakhstan | Smoking                     | 0.3 (0.1 to 0.4)  | 8.1 (4.1 to 13.3)         | 0.3 (0.1 to 0.5)                   | 8.4 (4.3 to 13.8)                      | 0.2 (0.1 to 0.4)   | 7 (3.6 to 10.7)           | 0.4 (0.2 to 0.7)                   | 7.4 (3.8 to 11.4)                      |
| Kazakhstan | Secondhand smoke            | 0.6 (0.2 to 1.1)  | 20.4 (5 to 35.5)          | 0.8 (0.2 to 1.4)                   | 21.1 (5.2 to 36.8)                     | 0.5 (0.1 to 0.8)   | 14.5 (3.5 to 25.3)        | 0.8 (0.2 to 1.5)                   | 15.3 (3.6 to 26.6)                     |
| Kazakhstan | Metabolic risks             | 1.8 (0.6 to 3.3)  | 35.2 (3 to 75.2)          | 1.6 (0.2 to 3.4)                   | 36.7 (3.3 to 77.9)                     | 2.5 (0.9 to 4.6)   | 51.6 (10.7 to 103.7)      | 3 (0.7 to 6.2)                     | 54.6 (11.3 to 110.9)                   |
| Kazakhstan | High body-mass index        | 0.8 (0 to 1.8)    | 10.8 (-12.3 to 33.7)      | 0.6 (-0.3 to 1.5)                  | 11.4 (-12.8 to 35.4)                   | 1.1 (0.2 to 2.2)   | 16.9 (-5 to 41.7)         | 1 (-0.3 to 2.5)                    | 17.9 (-5.2 to 43.5)                    |
| Kazakhstan | High fasting plasma glucose | 1 (0.2 to 2.3)    | 25.9 (4.8 to 59.2)        | 1.1 (0.2 to 2.6)                   | 26.9 (5 to 61.4)                       | 1.5 (0.3 to 3.5)   | 37.6 (7.2 to 85.8)        | 2.2 (0.4 to 5.4)                   | 39.9 (7.7 to 90.8)                     |
| Kenya      | All risk factors            | 1.4 (0.8 to 2.4)  | 35.8 (19.8 to 61)         | 1 (0.5 to 1.7)                     | 36.8 (20.4 to 62.7)                    | 2.3 (1.3 to 3.7)   | 54.5 (30.8 to 87.5)       | 1.6 (0.9 to 2.5)                   | 56 (31.7 to 89.2)                      |
| Kenya      | Behavioral risks            | 1 (0.6 to 1.6)    | 27.9 (16.4 to 46.3)       | 0.7 (0.4 to 1.2)                   | 28.7 (16.9 to 47.4)                    | 1.3 (0.9 to 1.9)   | 37.2 (23.7 to 54.9)       | 1.1 (0.6 to 1.7)                   | 38.2 (24.2 to 56.3)                    |
| Kenya      | Alcohol use                 | 0.4 (0.3 to 0.7)  | 12.9 (7.5 to 21.4)        | 0.3 (0.2 to 0.6)                   | 13.3 (7.8 to 21.9)                     | 0.6 (0.4 to 0.9)   | 16 (10.1 to 24.9)         | 0.5 (0.3 to 0.7)                   | 16.5 (10.5 to 25.5)                    |
| Kenya      | Diet high in red meat       | 0.2 (0 to 0.4)    | 6.3 (1.4 to 11.4)         | 0.2 (0 to 0.3)                     | 6.5 (1.5 to 11.7)                      | 0.3 (0.1 to 0.5)   | 9.7 (2.4 to 15.6)         | 0.3 (0.1 to 0.5)                   | 10 (2.4 to 16.1)                       |
| Kenya      | Low physical activity       | 0 (0 to 0.1)      | 1.2 (0.6 to 3)            | 0 (0 to 0.1)                       | 1.2 (0.7 to 3)                         | 0.1 (0 to 0.2)     | 1.8 (1.1 to 4.5)          | 0.1 (0 to 0.1)                     | 1.8 (1.1 to 4.6)                       |
| Kenya      | Smoking                     | 0.1 (0 to 0.2)    | 1.8 (0.8 to 3.3)          | 0.1 (0 to 0.1)                     | 1.8 (0.8 to 3.3)                       | 0.1 (0.1 to 0.2)   | 2.8 (1.4 to 4.9)          | 0.1 (0 to 0.2)                     | 2.9 (1.4 to 5.1)                       |
| Kenya      | Secondhand smoke            | 0.2 (0 to 0.4)    | 6.7 (1.4 to 14.2)         | 0.2 (0 to 0.4)                     | 6.8 (1.5 to 14.6)                      | 0.3 (0.1 to 0.5)   | 7.9 (1.8 to 15.4)         | 0.2 (0 to 0.4)                     | 8.1 (1.8 to 15.9)                      |
| Kenya      | Metabolic risks             | 0.5 (0.1 to 1.1)  | 8.7 (-0.1 to 22)          | 0.3 (0 to 0.6)                     | 9 (-0.1 to 22.7)                       | 1.1 (0.3 to 2.2)   | 18.9 (-0.1 to 44.9)       | 0.6 (0 to 1.3)                     | 19.5 (0 to 46.2)                       |
| Kenya      | High body-mass index        | 0.2 (0 to 0.5)    | 1.4 (-4 to 7.2)           | 0.1 (-0.1 to 0.2)                  | 1.4 (-4 to 7.4)                        | 0.5 (0 to 1.1)     | 4.9 (-8.3 to 18.6)        | 0.2 (-0.2 to 0.6)                  | 5 (-8.6 to 19.1)                       |
| Kenya      | High fasting plasma glucose | 0.3 (0.1 to 0.9)  | 7.5 (1.2 to 19.6)         | 0.2 (0 to 0.6)                     | 7.7 (1.2 to 20.2)                      | 0.6 (0.1 to 1.6)   | 14.6 (2.6 to 36.6)        | 0.4 (0.1 to 1.1)                   | 15.1 (2.7 to 37.7)                     |
| Kiribati   | All risk factors            | 9.8 (5.8 to 14.4) | 277.5 (168.9 to 410.6)    | 6.6 (3.7 to 10.3)                  | 284.1 (172.7 to 420.7)                 | 12.7 (7.5 to 19.8) | 341.1 (201.3 to 540)      | 8.9 (4.9 to 14.8)                  | 350 (206.9 to 552.2)                   |
| Kiribati   | Behavioral risks            | 4.1 (2.7 to 5.6)  | 120.6 (76.8 to 167.5)     | 2.8 (1.6 to 4.3)                   | 123.5 (78.7 to 171.4)                  | 5.1 (3.2 to 7.7)   | 139.1 (85.2 to 215.2)     | 3.6 (2.1 to 5.8)                   | 142.7 (87.6 to 219.9)                  |

| Location                         | Risk factor                 | 1990              |                           |                                    |                                        | 2019              |                           |                                    |                                        |
|----------------------------------|-----------------------------|-------------------|---------------------------|------------------------------------|----------------------------------------|-------------------|---------------------------|------------------------------------|----------------------------------------|
|                                  |                             | Deaths            | YLLs (Years of Life Lost) | YLDs (Years Lived with Disability) | DALYs (Disability-Adjusted Life Years) | Deaths            | YLLs (Years of Life Lost) | YLDs (Years Lived with Disability) | DALYs (Disability-Adjusted Life Years) |
| Kiribati                         | Alcohol use                 | 0.1 (0 to 0.2)    | 3.4 (0.9 to 6.8)          | 0.1 (0 to 0.1)                     | 3.5 (0.9 to 6.9)                       | 0.1 (0 to 0.2)    | 3.2 (0.7 to 6.7)          | 0.1 (0 to 0.2)                     | 3.3 (0.7 to 6.9)                       |
| Kiribati                         | Diet high in red meat       | 0.5 (0.1 to 0.8)  | 17 (3.3 to 25.7)          | 0.4 (0.1 to 0.6)                   | 17.4 (3.4 to 26.3)                     | 0.6 (0.1 to 1)    | 18.2 (3.4 to 29.9)        | 0.5 (0.1 to 0.8)                   | 18.7 (3.5 to 30.7)                     |
| Kiribati                         | Low physical activity       | 0.4 (0.2 to 0.9)  | 11.2 (4.2 to 23.2)        | 0.3 (0.1 to 0.6)                   | 11.5 (4.3 to 23.8)                     | 0.6 (0.2 to 1.1)  | 13.5 (4.9 to 27.8)        | 0.4 (0.1 to 0.8)                   | 13.9 (5.1 to 28.6)                     |
| Kiribati                         | Smoking                     | 2 (1.2 to 3)      | 54.9 (30.8 to 81.9)       | 1.4 (0.7 to 2.1)                   | 56.3 (31.5 to 83.9)                    | 2.7 (1.5 to 4.2)  | 66.6 (35.9 to 110)        | 1.8 (0.9 to 3)                     | 68.4 (36.9 to 112.6)                   |
| Kiribati                         | Secondhand smoke            | 1.2 (0.3 to 2.2)  | 39.8 (9.6 to 72.2)        | 0.9 (0.2 to 1.7)                   | 40.7 (9.8 to 73.8)                     | 1.4 (0.3 to 2.7)  | 44.4 (11 to 85)           | 1.1 (0.3 to 2.2)                   | 45.5 (11.3 to 87.1)                    |
| Kiribati                         | Metabolic risks             | 6.6 (2.7 to 11.2) | 183.9 (76.2 to 313.6)     | 4.5 (1.8 to 7.9)                   | 188.4 (78.2 to 321.1)                  | 9.1 (4 to 16.1)   | 238.8 (104.4 to 427.3)    | 6.3 (2.5 to 11.8)                  | 245.1 (107.7 to 436.9)                 |
| Kiribati                         | High body-mass index        | 4.7 (1.6 to 8.8)  | 129.8 (44.8 to 242.3)     | 3.2 (1 to 6)                       | 133 (46.1 to 247.4)                    | 5.8 (1.8 to 11.2) | 151.4 (47.7 to 296)       | 4 (1.3 to 7.9)                     | 155.4 (48.9 to 303.3)                  |
| Kiribati                         | High fasting plasma glucose | 2.3 (0.4 to 5.6)  | 65.5 (12.4 to 153.6)      | 1.6 (0.3 to 3.9)                   | 67.1 (12.7 to 157.8)                   | 4.1 (0.8 to 9.7)  | 107.1 (21.9 to 258.7)     | 2.8 (0.5 to 6.9)                   | 109.9 (22.4 to 265.3)                  |
| Kuwait                           | All risk factors            | 4.2 (2.5 to 6.3)  | 98.4 (55.8 to 150.3)      | 5.4 (2.8 to 8.9)                   | 103.8 (58.6 to 158.3)                  | 3.9 (2.2 to 6)    | 81.6 (44.1 to 131)        | 7.2 (3.4 to 12.1)                  | 88.8 (48.2 to 141.5)                   |
| Kuwait                           | Behavioral risks            | 1.9 (1.3 to 2.5)  | 53.8 (35.7 to 71)         | 3 (1.7 to 4.4)                     | 56.7 (37.6 to 75)                      | 1.4 (0.9 to 2.1)  | 35.2 (21.8 to 51.9)       | 3.1 (1.8 to 4.9)                   | 38.4 (23.9 to 56.1)                    |
| Kuwait                           | Alcohol use                 | 0 (0 to 0)        | 0 (0 to 0)                | 0 (0 to 0)                         | 0 (0 to 0)                             | 0 (0 to 0)        | 0.2 (0 to 0.5)            | 0 (0 to 0)                         | 0.3 (0 to 0.5)                         |
| Kuwait                           | Diet high in red meat       | 0.7 (0.3 to 0.9)  | 20.2 (7.8 to 27.3)        | 1.1 (0.4 to 1.7)                   | 21.3 (8.3 to 29)                       | 0.5 (0.2 to 0.7)  | 12.6 (4.6 to 19.9)        | 1.1 (0.4 to 1.9)                   | 13.7 (5.2 to 21.4)                     |
| Kuwait                           | Low physical activity       | 0.5 (0.2 to 0.8)  | 11.9 (4.5 to 20.8)        | 0.7 (0.2 to 1.3)                   | 12.6 (4.8 to 22.1)                     | 0.4 (0.2 to 0.7)  | 9.3 (3.3 to 16.5)         | 0.9 (0.3 to 1.6)                   | 10.2 (3.6 to 18.1)                     |
| Kuwait                           | Smoking                     | 0.2 (0.1 to 0.4)  | 5.9 (3.5 to 9)            | 0.3 (0.2 to 0.6)                   | 6.3 (3.7 to 9.5)                       | 0.1 (0.1 to 0.2)  | 3.2 (1.9 to 4.8)          | 0.3 (0.2 to 0.5)                   | 3.5 (2.1 to 5.2)                       |
| Kuwait                           | Secondhand smoke            | 0.6 (0.1 to 1)    | 17.8 (4.2 to 30.8)        | 1 (0.2 to 1.8)                     | 18.8 (4.4 to 32.5)                     | 0.4 (0.1 to 0.7)  | 11.3 (2.6 to 20.4)        | 1 (0.2 to 1.9)                     | 12.3 (2.8 to 22.1)                     |
| Kuwait                           | Metabolic risks             | 2.6 (0.9 to 4.7)  | 50.4 (7.7 to 102.3)       | 2.8 (0.5 to 5.8)                   | 53.2 (8 to 107.9)                      | 2.8 (1.1 to 5)    | 52.2 (14 to 100.8)        | 4.5 (1.1 to 9.2)                   | 56.7 (15.3 to 109)                     |
| Kuwait                           | High body-mass index        | 1.1 (0.1 to 2.2)  | 15.3 (-10 to 42.7)        | 0.8 (-0.6 to 2.2)                  | 16.1 (-10.6 to 44.3)                   | 1.2 (0.3 to 2.4)  | 19 (-3.9 to 42.4)         | 1.5 (-0.4 to 3.6)                  | 20.5 (-4.3 to 46.1)                    |
| Kuwait                           | High fasting plasma glucose | 1.6 (0.3 to 3.6)  | 38.3 (7.7 to 85.6)        | 2.2 (0.4 to 5.1)                   | 40.5 (8.2 to 90.3)                     | 1.7 (0.4 to 3.8)  | 37.4 (7.7 to 83.7)        | 3.4 (0.7 to 7.9)                   | 40.8 (8.3 to 91.2)                     |
| Kyrgyzstan                       | All risk factors            | 3.2 (2.1 to 4.3)  | 91 (61.4 to 121.5)        | 3.3 (1.9 to 4.8)                   | 94.3 (64 to 126.2)                     | 2.2 (1.4 to 3)    | 55.3 (35.8 to 78.7)       | 2.7 (1.6 to 4.2)                   | 58 (37.4 to 82.5)                      |
| Kyrgyzstan                       | Behavioral risks            | 2.2 (1.6 to 2.8)  | 73.1 (51.7 to 93.3)       | 2.5 (1.6 to 3.6)                   | 75.7 (53.2 to 96.6)                    | 1.3 (0.9 to 1.7)  | 39 (27 to 50.9)           | 1.9 (1.1 to 2.8)                   | 40.9 (28.5 to 53.5)                    |
| Kyrgyzstan                       | Alcohol use                 | 0.5 (0.4 to 0.7)  | 18.5 (13.6 to 24.4)       | 0.6 (0.4 to 0.9)                   | 19.1 (14.1 to 25.2)                    | 0.3 (0.2 to 0.5)  | 12.1 (8.4 to 16.7)        | 0.6 (0.3 to 0.9)                   | 12.6 (8.7 to 17.5)                     |
| Kyrgyzstan                       | Diet high in red meat       | 0.9 (0.5 to 1.2)  | 29.6 (14.5 to 40.2)       | 1 (0.5 to 1.6)                     | 30.6 (14.9 to 41.5)                    | 0.4 (0.2 to 0.6)  | 12.5 (5.1 to 18)          | 0.6 (0.2 to 1)                     | 13.1 (5.4 to 18.9)                     |
| Kyrgyzstan                       | Low physical activity       | 0.1 (0.1 to 0.2)  | 3 (1.9 to 5.7)            | 0.1 (0.1 to 0.2)                   | 3.1 (2 to 5.9)                         | 0.1 (0.1 to 0.1)  | 1.8 (1.1 to 3.4)          | 0.1 (0.1 to 0.2)                   | 1.9 (1.2 to 3.6)                       |
| Kyrgyzstan                       | Smoking                     | 0.2 (0.1 to 0.3)  | 5.9 (3.7 to 8.6)          | 0.2 (0.1 to 0.3)                   | 6.1 (3.8 to 8.9)                       | 0.1 (0.1 to 0.2)  | 3.9 (2.4 to 5.4)          | 0.2 (0.1 to 0.3)                   | 4 (2.5 to 5.7)                         |
| Kyrgyzstan                       | Secondhand smoke            | 0.6 (0.1 to 1.1)  | 19.9 (4.8 to 35.1)        | 0.7 (0.2 to 1.3)                   | 20.6 (4.9 to 36.1)                     | 0.4 (0.1 to 0.6)  | 10.8 (2.5 to 18.9)        | 0.5 (0.1 to 1)                     | 11.3 (2.6 to 19.7)                     |
| Kyrgyzstan                       | Metabolic risks             | 1.1 (0.3 to 2.2)  | 19.8 (-3.2 to 48.2)       | 0.8 (0 to 1.9)                     | 20.7 (-3.3 to 49.9)                    | 1 (0.3 to 1.8)    | 18.3 (2.2 to 39.8)        | 0.9 (0.1 to 2)                     | 19.2 (2.3 to 41.6)                     |
| Kyrgyzstan                       | High body-mass index        | 0.5 (0 to 1.3)    | 5.5 (-11.4 to 23.1)       | 0.3 (-0.3 to 1)                    | 5.8 (-11.7 to 23.9)                    | 0.5 (0 to 1)      | 6.2 (-5.3 to 19)          | 0.3 (-0.2 to 1)                    | 6.6 (-5.5 to 19.9)                     |
| Kyrgyzstan                       | High fasting plasma glucose | 0.6 (0.1 to 1.3)  | 14.9 (2.7 to 34.9)        | 0.6 (0.1 to 1.4)                   | 15.5 (2.8 to 36.1)                     | 0.5 (0.1 to 1.3)  | 12.7 (2.3 to 31.6)        | 0.6 (0.1 to 1.6)                   | 13.4 (2.4 to 33.1)                     |
| Lao People's Democratic Republic | All risk factors            | 4.2 (2.4 to 6.6)  | 130 (73 to 209.6)         | 2.8 (1.5 to 4.6)                   | 132.8 (74.6 to 214.2)                  | 6.3 (3.7 to 10)   | 179.8 (106.3 to 286.3)    | 5.3 (2.9 to 8.9)                   | 185.1 (109.7 to 292.2)                 |
| Lao People's Democratic Republic | Behavioral risks            | 2.6 (1.5 to 4)    | 86 (48.5 to 140)          | 1.8 (0.9 to 3)                     | 87.8 (49.6 to 142.6)                   | 2.9 (1.8 to 4.2)  | 92.3 (56.8 to 138.1)      | 2.6 (1.5 to 4.4)                   | 94.9 (58.7 to 141.5)                   |
| Lao People's Democratic Republic | Alcohol use                 | 1 (0.6 to 1.6)    | 37 (20.4 to 61.2)         | 0.7 (0.4 to 1.3)                   | 37.8 (20.7 to 62.5)                    | 1.3 (0.8 to 2)    | 45.4 (27.6 to 71.5)       | 1.3 (0.7 to 2.2)                   | 46.7 (28.4 to 73.4)                    |
| Lao People's Democratic Republic | Diet high in red meat       | 0.3 (0.1 to 0.5)  | 10.2 (1.8 to 18)          | 0.2 (0 to 0.4)                     | 10.4 (1.8 to 18.4)                     | 0.5 (0.1 to 0.8)  | 14.8 (3.3 to 25.5)        | 0.4 (0.1 to 0.8)                   | 15.3 (3.4 to 26.2)                     |
| Lao People's Democratic Republic | Low physical activity       | 0.1 (0.1 to 0.2)  | 2.8 (1.5 to 6.6)          | 0.1 (0 to 0.1)                     | 2.9 (1.5 to 6.8)                       | 0.1 (0.1 to 0.2)  | 2.9 (1.6 to 6.5)          | 0.1 (0 to 0.2)                     | 3 (1.6 to 6.7)                         |
| Lao People's Democratic Republic | Smoking                     | 0.4 (0.2 to 0.6)  | 10 (5.1 to 17.1)          | 0.2 (0.1 to 0.4)                   | 10.2 (5.2 to 17.5)                     | 0.3 (0.2 to 0.5)  | 7.2 (3.8 to 12.4)         | 0.2 (0.1 to 0.4)                   | 7.5 (3.9 to 12.7)                      |
| Lao People's Democratic Republic | Secondhand smoke            | 0.9 (0.2 to 1.8)  | 30.1 (6 to 60.3)          | 0.6 (0.1 to 1.3)                   | 30.7 (6.1 to 61.7)                     | 0.9 (0.2 to 1.7)  | 26.9 (5.8 to 54.2)        | 0.8 (0.2 to 1.6)                   | 27.6 (6 to 55.8)                       |
| Lao People's Democratic Republic | Metabolic risks             | 1.9 (0.5 to 3.8)  | 50.2 (14.1 to 106.5)      | 1.2 (0.3 to 2.5)                   | 51.4 (14.4 to 108.5)                   | 3.9 (1.6 to 7.2)  | 101.5 (38.3 to 188.3)     | 3 (1.1 to 5.8)                     | 104.6 (39.4 to 193.3)                  |
| Lao People's Democratic Republic | High body-mass index        | 0.9 (0.2 to 2.2)  | 25.1 (4.6 to 62.4)        | 0.6 (0.1 to 1.5)                   | 25.7 (4.7 to 63.7)                     | 2.4 (0.6 to 5.1)  | 63.9 (17 to 135.6)        | 1.9 (0.5 to 4.1)                   | 65.7 (17.6 to 139)                     |
| Lao People's Democratic Republic | High fasting plasma glucose | 1 (0.2 to 2.5)    | 26.4 (4.7 to 66.7)        | 0.6 (0.1 to 1.6)                   | 27 (4.7 to 68.2)                       | 1.8 (0.4 to 4.3)  | 43.3 (8.2 to 107.4)       | 1.3 (0.3 to 3.3)                   | 44.7 (8.5 to 110.2)                    |
| Latvia                           | All risk factors            | 5.3 (4.1 to 6.7)  | 153.7 (115.8 to 191)      | 7.8 (5 to 11.3)                    | 161.6 (121.9 to 199.5)                 | 5.7 (3.8 to 7.9)  | 147 (98.7 to 207.1)       | 11.3 (6.8 to 17.2)                 | 158.3 (106.5 to 221.6)                 |

| Location | Risk factor                 | 1990              |                           |                                    |                                        | 2019              |                           |                                    |                                        |
|----------|-----------------------------|-------------------|---------------------------|------------------------------------|----------------------------------------|-------------------|---------------------------|------------------------------------|----------------------------------------|
|          |                             | Deaths            | YLLs (Years of Life Lost) | YLDs (Years Lived with Disability) | DALYs (Disability-Adjusted Life Years) | Deaths            | YLLs (Years of Life Lost) | YLDs (Years Lived with Disability) | DALYs (Disability-Adjusted Life Years) |
| Latvia   | Behavioral risks            | 4 (3.2 to 4.8)    | 130.2 (103.2 to 156.4)    | 6.3 (4.1 to 8.9)                   | 136.5 (108.2 to 162.7)                 | 3.8 (2.7 to 5.2)  | 111.7 (78.6 to 154.8)     | 8.3 (5.1 to 12.6)                  | 120 (84.7 to 165.8)                    |
| Latvia   | Alcohol use                 | 1.7 (1.2 to 2.1)  | 58.2 (42.8 to 72.5)       | 2.7 (1.7 to 4.1)                   | 60.9 (44.8 to 75.6)                    | 2 (1.3 to 2.7)    | 59.8 (40.7 to 84.5)       | 4.4 (2.6 to 6.8)                   | 64.2 (43.3 to 91)                      |
| Latvia   | Diet high in red meat       | 0.9 (0.4 to 1.2)  | 29.4 (12.9 to 38.9)       | 1.4 (0.6 to 2.2)                   | 30.8 (13.6 to 40.8)                    | 0.7 (0.2 to 1.1)  | 19.7 (7.1 to 31)          | 1.5 (0.5 to 2.4)                   | 21.1 (7.6 to 33.2)                     |
| Latvia   | Low physical activity       | 0.2 (0.1 to 0.4)  | 5.3 (3 to 9.1)            | 0.3 (0.1 to 0.5)                   | 5.6 (3.2 to 9.6)                       | 0.3 (0.1 to 0.4)  | 5.2 (2.5 to 9.3)          | 0.4 (0.2 to 0.8)                   | 5.7 (2.7 to 10.1)                      |
| Latvia   | Smoking                     | 0.9 (0.5 to 1.3)  | 29 (16.6 to 42.4)         | 1.4 (0.7 to 2.3)                   | 30.4 (17.4 to 44.8)                    | 0.8 (0.5 to 1.2)  | 22.5 (12.6 to 34.9)       | 1.7 (0.9 to 2.9)                   | 24.2 (13.5 to 37.3)                    |
| Latvia   | Secondhand smoke            | 0.6 (0.1 to 1)    | 19 (4.7 to 32.9)          | 0.9 (0.2 to 1.7)                   | 20 (5 to 34.4)                         | 0.5 (0.1 to 0.9)  | 14.1 (3.1 to 26.2)        | 1 (0.2 to 2)                       | 15.2 (3.3 to 28.4)                     |
| Latvia   | Metabolic risks             | 1.6 (0.4 to 3)    | 28.3 (-2.7 to 65.2)       | 1.9 (0.2 to 3.9)                   | 30.1 (-2.4 to 69.2)                    | 2.3 (0.9 to 4.2)  | 44.3 (11.6 to 90.3)       | 3.8 (1.1 to 7.4)                   | 48.1 (12.6 to 96.8)                    |
| Latvia   | High body-mass index        | 0.9 (0.1 to 2)    | 11.3 (-13.8 to 37)        | 0.9 (-0.3 to 2.5)                  | 12.3 (-13.8 to 39.8)                   | 1.3 (0.3 to 2.7)  | 22.5 (-2.4 to 51.9)       | 2 (0.1 to 4.4)                     | 24.5 (-2.4 to 55.2)                    |
| Latvia   | High fasting plasma glucose | 0.7 (0.1 to 1.6)  | 18 (3.3 to 42.2)          | 1 (0.2 to 2.4)                     | 18.9 (3.5 to 44)                       | 1 (0.2 to 2.5)    | 23.9 (4.3 to 58.6)        | 1.9 (0.3 to 4.9)                   | 25.8 (4.7 to 63.6)                     |
| Lebanon  | All risk factors            | 5.2 (3.2 to 7.8)  | 129 (73.8 to 197.2)       | 5.2 (2.9 to 8.5)                   | 134.2 (77.1 to 204.1)                  | 9.9 (6 to 15.1)   | 231.9 (137.1 to 360.7)    | 18.5 (9.5 to 30.9)                 | 250.3 (150.3 to 390.9)                 |
| Lebanon  | Behavioral risks            | 3.2 (2.2 to 4.4)  | 94.9 (63.7 to 129.8)      | 3.7 (2.2 to 5.5)                   | 98.7 (66.3 to 135.2)                   | 5.4 (3.7 to 7.6)  | 145.1 (98.3 to 208.2)     | 11.8 (6.9 to 18.3)                 | 156.8 (105.3 to 227)                   |
| Lebanon  | Alcohol use                 | 0.3 (0.2 to 0.5)  | 10.8 (7.4 to 15.8)        | 0.4 (0.2 to 0.6)                   | 11.3 (7.7 to 16.3)                     | 0.3 (0.2 to 0.4)  | 8.1 (4.8 to 12.5)         | 0.7 (0.4 to 1.1)                   | 8.8 (5.3 to 13.6)                      |
| Lebanon  | Diet high in red meat       | 0.6 (0.1 to 1)    | 20.2 (4.8 to 30.3)        | 0.8 (0.2 to 1.3)                   | 20.9 (5 to 31.5)                       | 1 (0.3 to 1.6)    | 29.5 (8.9 to 45.5)        | 2.4 (0.7 to 4.1)                   | 32 (9.6 to 49.6)                       |
| Lebanon  | Low physical activity       | 0.5 (0.2 to 0.8)  | 11 (4.5 to 21.1)          | 0.5 (0.2 to 0.9)                   | 11.5 (4.7 to 22)                       | 0.8 (0.3 to 1.4)  | 17.7 (6.4 to 33.5)        | 1.5 (0.5 to 2.9)                   | 19.2 (6.9 to 36.3)                     |
| Lebanon  | Smoking                     | 1.2 (0.8 to 1.8)  | 33.8 (20.6 to 50.1)       | 1.3 (0.7 to 2.2)                   | 35.1 (21.4 to 52)                      | 2.5 (1.6 to 3.7)  | 66.3 (41.4 to 97.9)       | 5.3 (2.9 to 8.7)                   | 71.6 (44.6 to 106.7)                   |
| Lebanon  | Secondhand smoke            | 0.7 (0.2 to 1.4)  | 23.8 (5.4 to 43.2)        | 0.9 (0.2 to 1.8)                   | 24.7 (5.6 to 44.8)                     | 1.1 (0.2 to 1.9)  | 31.7 (6.9 to 58.6)        | 2.6 (0.6 to 4.9)                   | 34.3 (7.5 to 63.1)                     |
| Lebanon  | Metabolic risks             | 2.3 (0.5 to 4.8)  | 40.4 (-6.8 to 102.3)      | 1.8 (-0.1 to 4.4)                  | 42.2 (-6.8 to 106.1)                   | 5.4 (1.9 to 10.6) | 105.6 (20.6 to 231.5)     | 8.2 (1.1 to 18.8)                  | 113.7 (21.1 to 249.7)                  |
| Lebanon  | High body-mass index        | 0.8 (-0.2 to 2.1) | 4.2 (-25.1 to 31.9)       | 0.3 (-0.9 to 1.5)                  | 4.5 (-26 to 33.1)                      | 2.2 (0.3 to 4.7)  | 29.7 (-20.4 to 86.5)      | 1.9 (-2.1 to 6.6)                  | 31.6 (-22.1 to 93.2)                   |
| Lebanon  | High fasting plasma glucose | 1.6 (0.3 to 3.7)  | 38.1 (7 to 90.2)          | 1.6 (0.3 to 4)                     | 39.7 (7.2 to 93.5)                     | 3.6 (0.7 to 8.2)  | 82.4 (15.4 to 191.6)      | 6.8 (1.2 to 17.1)                  | 89.1 (16.7 to 208.3)                   |
| Lesotho  | All risk factors            | 2.3 (1.4 to 3.5)  | 55.7 (33.1 to 85.5)       | 1.5 (0.8 to 2.4)                   | 57.2 (34 to 87.8)                      | 6.3 (3.3 to 10.8) | 148.9 (76.1 to 263.2)     | 4 (2 to 7.2)                       | 152.9 (78.2 to 270.2)                  |
| Lesotho  | Behavioral risks            | 1.3 (0.9 to 1.9)  | 38.3 (23.8 to 56.7)       | 0.9 (0.5 to 1.5)                   | 39.3 (24.5 to 58)                      | 3.1 (1.7 to 4.9)  | 88.4 (47 to 142.5)        | 2.2 (1.2 to 3.9)                   | 90.6 (48.1 to 145.8)                   |
| Lesotho  | Alcohol use                 | 0.5 (0.3 to 0.8)  | 16.3 (9.7 to 25.2)        | 0.4 (0.2 to 0.7)                   | 16.7 (10 to 25.8)                      | 1.2 (0.6 to 2)    | 38.8 (18.7 to 63.6)       | 1 (0.5 to 1.7)                     | 39.8 (19.1 to 64.9)                    |
| Lesotho  | Diet high in red meat       | 0.3 (0.1 to 0.5)  | 8.5 (1.7 to 14)           | 0.2 (0 to 0.4)                     | 8.7 (1.8 to 14.3)                      | 0.7 (0.1 to 1.1)  | 18.6 (4 to 33.4)          | 0.5 (0.1 to 0.9)                   | 19.1 (4.1 to 34.2)                     |
| Lesotho  | Low physical activity       | 0.1 (0.1 to 0.2)  | 2.2 (1.2 to 4.2)          | 0.1 (0 to 0.1)                     | 2.2 (1.2 to 4.3)                       | 0.2 (0.1 to 0.4)  | 5 (2.4 to 10)             | 0.1 (0.1 to 0.3)                   | 5.2 (2.5 to 10.3)                      |
| Lesotho  | Smoking                     | 0.1 (0.1 to 0.2)  | 2.2 (1.3 to 3.4)          | 0.1 (0 to 0.1)                     | 2.3 (1.3 to 3.5)                       | 0.3 (0.1 to 0.4)  | 4.6 (2.5 to 7.5)          | 0.1 (0.1 to 0.2)                   | 4.7 (2.6 to 7.8)                       |
| Lesotho  | Secondhand smoke            | 0.4 (0.1 to 0.7)  | 10.6 (2.4 to 20.6)        | 0.3 (0.1 to 0.5)                   | 10.9 (2.5 to 21)                       | 0.8 (0.2 to 1.7)  | 25.3 (5.6 to 50.9)        | 0.6 (0.1 to 1.3)                   | 25.9 (5.8 to 52.2)                     |
| Lesotho  | Metabolic risks             | 1.1 (0.3 to 2.2)  | 19.2 (3.2 to 41.9)        | 0.6 (0.1 to 1.3)                   | 19.8 (3.3 to 43)                       | 3.6 (1.1 to 7.5)  | 67.3 (10.9 to 153.2)      | 2 (0.4 to 4.4)                     | 69.3 (11.2 to 157)                     |
| Lesotho  | High body-mass index        | 0.4 (0.1 to 0.9)  | 5.9 (-3.9 to 17.9)        | 0.2 (0 to 0.5)                     | 6.1 (-3.9 to 18.4)                     | 1.5 (0.1 to 3.4)  | 21.1 (-14.6 to 60.7)      | 0.7 (-0.3 to 1.9)                  | 21.8 (-14.8 to 62.2)                   |
| Lesotho  | High fasting plasma glucose | 0.7 (0.1 to 1.6)  | 13.9 (2.4 to 34.6)        | 0.4 (0.1 to 1)                     | 14.3 (2.5 to 35.6)                     | 2.2 (0.4 to 5.6)  | 49.9 (8.9 to 129.7)       | 1.4 (0.3 to 3.6)                   | 51.3 (9.2 to 132.9)                    |
| Liberia  | All risk factors            | 2.6 (1.6 to 3.8)  | 66.3 (41.1 to 96.3)       | 1.6 (0.9 to 2.5)                   | 67.9 (42 to 98.5)                      | 3.6 (2 to 6.4)    | 86 (46.4 to 150.8)        | 2.5 (1.3 to 4.4)                   | 88.5 (47.6 to 155.4)                   |
| Liberia  | Behavioral risks            | 1.5 (1.1 to 2)    | 44.8 (32.2 to 60.9)       | 1 (0.6 to 1.5)                     | 45.8 (32.8 to 62.3)                    | 1.7 (1.1 to 2.6)  | 48.5 (30.5 to 75.8)       | 1.3 (0.7 to 2.2)                   | 49.8 (31.4 to 78.1)                    |
| Liberia  | Alcohol use                 | 0.9 (0.6 to 1.2)  | 27.8 (19.1 to 38.5)       | 0.6 (0.4 to 0.9)                   | 28.4 (19.5 to 39.5)                    | 1 (0.6 to 1.5)    | 29.6 (17.1 to 47.7)       | 0.8 (0.4 to 1.3)                   | 30.4 (17.6 to 48.9)                    |
| Liberia  | Diet high in red meat       | 0.2 (0 to 0.2)    | 4.5 (1 to 7.1)            | 0.1 (0 to 0.2)                     | 4.6 (1 to 7.2)                         | 0.2 (0 to 0.3)    | 4.8 (1.1 to 8.9)          | 0.1 (0 to 0.2)                     | 4.9 (1.1 to 9.1)                       |
| Liberia  | Low physical activity       | 0.2 (0.1 to 0.3)  | 3.5 (1.8 to 6.6)          | 0.1 (0 to 0.2)                     | 3.6 (1.8 to 6.8)                       | 0.2 (0.1 to 0.4)  | 4.6 (2.2 to 8.9)          | 0.1 (0.1 to 0.3)                   | 4.7 (2.2 to 9.1)                       |
| Liberia  | Smoking                     | 0.1 (0.1 to 0.2)  | 2.7 (1.2 to 4.6)          | 0.1 (0 to 0.1)                     | 2.7 (1.2 to 4.7)                       | 0.1 (0 to 0.2)    | 2.7 (1.1 to 5)            | 0.1 (0 to 0.2)                     | 2.8 (1.2 to 5.2)                       |
| Liberia  | Secondhand smoke            | 0.3 (0.1 to 0.5)  | 7.8 (1.8 to 14.2)         | 0.2 (0 to 0.3)                     | 8 (1.9 to 14.5)                        | 0.3 (0.1 to 0.6)  | 8.3 (1.7 to 16.8)         | 0.2 (0 to 0.5)                     | 8.5 (1.7 to 17.3)                      |
| Liberia  | Metabolic risks             | 1.2 (0.4 to 2.4)  | 23.8 (4.3 to 50.5)        | 0.6 (0.2 to 1.4)                   | 24.5 (4.5 to 51.9)                     | 2.1 (0.7 to 4.5)  | 40.9 (7.8 to 93.1)        | 1.3 (0.3 to 2.9)                   | 42.2 (8 to 96)                         |
| Liberia  | High body-mass index        | 0.5 (0 to 1)      | 7.7 (-4.7 to 21.1)        | 0.2 (0 to 0.6)                     | 8 (-4.7 to 21.6)                       | 0.7 (0.1 to 1.8)  | 11.4 (-7.8 to 34.7)       | 0.4 (-0.1 to 1.1)                  | 11.8 (-8 to 35.6)                      |
| Liberia  | High fasting plasma glucose | 0.8 (0.1 to 1.8)  | 16.8 (3 to 41.5)          | 0.4 (0.1 to 1.1)                   | 17.2 (3 to 42.5)                       | 1.4 (0.3 to 3.6)  | 31.4 (6 to 80)            | 0.9 (0.2 to 2.4)                   | 32.3 (6.2 to 82)                       |

| Location   | Risk factor                 | 1990              |                           |                                    |                                        | 2019              |                           |                                    |                                        |
|------------|-----------------------------|-------------------|---------------------------|------------------------------------|----------------------------------------|-------------------|---------------------------|------------------------------------|----------------------------------------|
|            |                             | Deaths            | YLLs (Years of Life Lost) | YLDs (Years Lived with Disability) | DALYs (Disability-Adjusted Life Years) | Deaths            | YLLs (Years of Life Lost) | YLDs (Years Lived with Disability) | DALYs (Disability-Adjusted Life Years) |
| Libya      | All risk factors            | 2 (1 to 3.3)      | 49.2 (23 to 83.2)         | 2 (0.9 to 3.6)                     | 51.2 (24.1 to 86.2)                    | 3.8 (1.9 to 6.7)  | 92.2 (40.7 to 170.2)      | 4.7 (2 to 8.9)                     | 96.9 (42.6 to 178.7)                   |
| Libya      | Behavioral risks            | 1 (0.6 to 1.5)    | 30.5 (17 to 46.5)         | 1.2 (0.6 to 1.9)                   | 31.7 (17.6 to 48.2)                    | 1.4 (0.8 to 2.1)  | 41.9 (22.2 to 65.9)       | 2.1 (1 to 3.5)                     | 44 (23.3 to 69.7)                      |
| Libya      | Alcohol use                 | 0 (0 to 0)        | 0.2 (0.1 to 0.3)          | 0 (0 to 0)                         | 0.2 (0.1 to 0.3)                       | 0 (0 to 0)        | 1 (0.4 to 1.5)            | 0 (0 to 0.1)                       | 1 (0.4 to 1.6)                         |
| Libya      | Diet high in red meat       | 0.3 (0.1 to 0.5)  | 10.8 (3 to 16.8)          | 0.4 (0.1 to 0.7)                   | 11.2 (3.2 to 17.4)                     | 0.3 (0.1 to 0.5)  | 10.6 (2.1 to 17.1)        | 0.5 (0.1 to 1)                     | 11.1 (2.2 to 18.1)                     |
| Libya      | Low physical activity       | 0.2 (0.1 to 0.4)  | 6 (2.3 to 11.3)           | 0.2 (0.1 to 0.5)                   | 6.3 (2.4 to 11.7)                      | 0.4 (0.1 to 0.7)  | 9.7 (3.5 to 18.8)         | 0.5 (0.2 to 1)                     | 10.2 (3.7 to 19.7)                     |
| Libya      | Smoking                     | 0 (0 to 0.1)      | 1 (0.6 to 1.8)            | 0 (0 to 0.1)                       | 1.1 (0.6 to 1.9)                       | 0 (0 to 0.1)      | 1.1 (0.6 to 1.9)          | 0.1 (0 to 0.1)                     | 1.2 (0.6 to 2)                         |
| Libya      | Secondhand smoke            | 0.4 (0.1 to 0.7)  | 13.3 (3.2 to 24.4)        | 0.5 (0.1 to 0.9)                   | 13.8 (3.3 to 25.2)                     | 0.6 (0.1 to 1.2)  | 20.7 (4.4 to 38.2)        | 1 (0.2 to 2)                       | 21.7 (4.7 to 40.1)                     |
| Libya      | Metabolic risks             | 1.1 (0.3 to 2.3)  | 20.5 (-3.2 to 51.8)       | 0.9 (0 to 2.2)                     | 21.4 (-3.2 to 54)                      | 2.7 (0.8 to 5.5)  | 55 (4.3 to 127.6)         | 2.8 (0.2 to 6.7)                   | 57.8 (4.2 to 134.2)                    |
| Libya      | High body-mass index        | 0.4 (-0.1 to 1.1) | 2.7 (-12.5 to 18.2)       | 0.2 (-0.4 to 0.9)                  | 2.9 (-12.8 to 18.9)                    | 0.9 (-0.1 to 1.9) | 7.4 (-20.6 to 34.8)       | 0.3 (-1.1 to 1.8)                  | 7.7 (-21.9 to 36.2)                    |
| Libya      | High fasting plasma glucose | 0.7 (0.1 to 1.8)  | 18.9 (3.3 to 46)          | 0.8 (0.1 to 2)                     | 19.7 (3.5 to 47.5)                     | 2 (0.4 to 4.7)    | 51.4 (10.6 to 123)        | 2.7 (0.5 to 6.6)                   | 54.1 (11.1 to 129)                     |
| Lithuania  | All risk factors            | 5 (3.9 to 6.2)    | 147.2 (113.2 to 177.9)    | 8.3 (5.5 to 11.7)                  | 155.6 (118.8 to 188)                   | 5.2 (3.8 to 6.8)  | 138.5 (102.6 to 182.4)    | 10.5 (6.8 to 15.7)                 | 149 (110.1 to 197)                     |
| Lithuania  | Behavioral risks            | 3.9 (3.2 to 4.6)  | 128.8 (106 to 150.7)      | 7.1 (4.8 to 10)                    | 136 (111.4 to 159.2)                   | 3.8 (2.9 to 5)    | 113.8 (85.3 to 150.3)     | 8.6 (5.6 to 12.9)                  | 122.4 (91.7 to 162.5)                  |
| Lithuania  | Alcohol use                 | 2 (1.5 to 2.4)    | 67.2 (51.8 to 81.6)       | 3.7 (2.4 to 5.3)                   | 70.9 (54.8 to 86.4)                    | 2.2 (1.6 to 2.9)  | 68.2 (49.1 to 91.5)       | 5.1 (3.2 to 7.9)                   | 73.4 (52.9 to 99)                      |
| Lithuania  | Diet high in red meat       | 0.9 (0.5 to 1.3)  | 30.1 (14.9 to 40.2)       | 1.7 (0.7 to 2.6)                   | 31.8 (15.6 to 42.6)                    | 0.8 (0.4 to 1.2)  | 22.5 (10.4 to 33.4)       | 1.7 (0.7 to 2.8)                   | 24.2 (11.2 to 35.9)                    |
| Lithuania  | Low physical activity       | 0.2 (0.1 to 0.3)  | 4.8 (2.7 to 8.3)          | 0.3 (0.2 to 0.5)                   | 5.1 (2.9 to 8.8)                       | 0.2 (0.1 to 0.4)  | 4.6 (2.4 to 8.2)          | 0.4 (0.2 to 0.7)                   | 5 (2.6 to 8.8)                         |
| Lithuania  | Smoking                     | 0.6 (0.4 to 0.9)  | 21.3 (12.3 to 31.4)       | 1.2 (0.6 to 1.9)                   | 22.5 (12.9 to 33.2)                    | 0.6 (0.4 to 0.9)  | 17.7 (10.4 to 26.9)       | 1.3 (0.7 to 2.2)                   | 19.1 (11.1 to 28.9)                    |
| Lithuania  | Secondhand smoke            | 0.5 (0.1 to 0.8)  | 16.5 (4 to 28.4)          | 0.9 (0.2 to 1.7)                   | 17.4 (4.2 to 29.9)                     | 0.4 (0.1 to 0.6)  | 11.1 (2.6 to 19.9)        | 0.8 (0.2 to 1.6)                   | 11.9 (2.8 to 21.5)                     |
| Lithuania  | Metabolic risks             | 1.3 (0.4 to 2.5)  | 22.4 (-3.4 to 52.6)       | 1.4 (-0.1 to 3.3)                  | 23.8 (-3.3 to 55.6)                    | 1.7 (0.6 to 3.1)  | 31.6 (6.8 to 62.7)        | 2.5 (0.5 to 5)                     | 34.1 (7.3 to 68.1)                     |
| Lithuania  | High body-mass index        | 0.8 (0 to 1.7)    | 8.4 (-13.2 to 30)         | 0.6 (-0.7 to 2)                    | 9.1 (-13.9 to 31.8)                    | 1.1 (0.3 to 2.1)  | 16.8 (-2.5 to 39)         | 1.3 (-0.2 to 3.2)                  | 18.1 (-2.7 to 41.5)                    |
| Lithuania  | High fasting plasma glucose | 0.6 (0.1 to 1.3)  | 14.7 (2.7 to 34.7)        | 0.9 (0.2 to 2.1)                   | 15.6 (2.8 to 36.5)                     | 0.7 (0.1 to 1.6)  | 16 (2.8 to 38.5)          | 1.2 (0.2 to 3.2)                   | 17.2 (3.1 to 41.9)                     |
| Luxembourg | All risk factors            | 11 (9.1 to 13.2)  | 289.3 (242.2 to 339.5)    | 22.1 (15.1 to 30.8)                | 311.4 (261.2 to 363.4)                 | 7 (5.2 to 9.4)    | 160.3 (120.5 to 207.7)    | 21.2 (12.9 to 32)                  | 181.6 (136.8 to 235.6)                 |
| Luxembourg | Behavioral risks            | 9.3 (7.9 to 10.7) | 258.1 (219.2 to 297.8)    | 19.5 (13.4 to 27.5)                | 277.7 (236.2 to 319.1)                 | 4.9 (4 to 6.1)    | 124.2 (99.8 to 150.7)     | 16.3 (10.3 to 23.5)                | 140.6 (111.9 to 171.9)                 |
| Luxembourg | Alcohol use                 | 5 (4.1 to 6.1)    | 141.3 (115.1 to 169.1)    | 10.7 (7.1 to 15.3)                 | 152 (124.1 to 182.1)                   | 2.6 (2 to 3.4)    | 67.3 (51.6 to 87.4)       | 8.8 (5.6 to 12.9)                  | 76.2 (57.6 to 98.7)                    |
| Luxembourg | Diet high in red meat       | 1.8 (0.9 to 2.5)  | 50.1 (25 to 68.8)         | 3.8 (1.8 to 6.1)                   | 53.9 (26.8 to 74.2)                    | 1.1 (0.5 to 1.5)  | 27.1 (13.4 to 39)         | 3.6 (1.6 to 5.9)                   | 30.7 (14.9 to 44.4)                    |
| Luxembourg | Low physical activity       | 0.5 (0.2 to 0.9)  | 9.7 (3.7 to 19.4)         | 0.8 (0.3 to 1.7)                   | 10.5 (4 to 21.1)                       | 0.3 (0.1 to 0.6)  | 6 (2.1 to 11.7)           | 0.8 (0.3 to 1.8)                   | 6.8 (2.4 to 13.4)                      |
| Luxembourg | Smoking                     | 2.4 (1.7 to 3.2)  | 69 (47.9 to 92)           | 5.2 (3.1 to 7.9)                   | 74.2 (51.3 to 99.6)                    | 1.2 (0.8 to 1.6)  | 28.9 (19.9 to 39.5)       | 3.8 (2.2 to 6)                     | 32.7 (22.5 to 44.6)                    |
| Luxembourg | Secondhand smoke            | 0.6 (0.1 to 1.1)  | 19.2 (4.4 to 33.6)        | 1.4 (0.3 to 2.6)                   | 20.6 (4.8 to 35.7)                     | 0.3 (0.1 to 0.5)  | 8.1 (2 to 14.4)           | 1.1 (0.2 to 2)                     | 9.2 (2.2 to 16.2)                      |
| Luxembourg | Metabolic risks             | 2.4 (0.9 to 4.4)  | 44.4 (10.5 to 87.5)       | 3.7 (1 to 7.2)                     | 48 (11.2 to 94.4)                      | 2.8 (1 to 5.3)    | 49.4 (14.5 to 98.1)       | 6.7 (2 to 13.8)                    | 56.1 (16.6 to 111.1)                   |
| Luxembourg | High body-mass index        | 1.4 (0.3 to 2.9)  | 23.5 (-2.1 to 55.2)       | 2 (0 to 4.6)                       | 25.5 (-2.1 to 59.4)                    | 1 (0.3 to 2)      | 14.8 (-0.7 to 34.5)       | 2 (-0.1 to 4.8)                    | 16.8 (-0.6 to 39.3)                    |
| Luxembourg | High fasting plasma glucose | 1.1 (0.2 to 2.5)  | 22 (4 to 51.4)            | 1.8 (0.3 to 4.5)                   | 23.8 (4.3 to 56.8)                     | 1.9 (0.4 to 4.3)  | 37 (7.4 to 83.3)          | 5 (1 to 12.2)                      | 42 (8.3 to 94.1)                       |
| Madagascar | All risk factors            | 1.8 (1.2 to 2.6)  | 52.3 (33 to 74.1)         | 1.2 (0.7 to 1.9)                   | 53.5 (33.8 to 75.6)                    | 2.2 (1.2 to 3.6)  | 56.8 (31.8 to 93.4)       | 1.5 (0.8 to 2.6)                   | 58.4 (32.5 to 95.9)                    |
| Madagascar | Behavioral risks            | 1.3 (0.9 to 1.8)  | 42.1 (27.3 to 58.5)       | 0.9 (0.5 to 1.4)                   | 43 (27.9 to 59.7)                      | 1.2 (0.7 to 1.8)  | 36 (21.2 to 55.6)         | 0.9 (0.5 to 1.4)                   | 36.9 (21.8 to 56.8)                    |
| Madagascar | Alcohol use                 | 0.5 (0.3 to 0.7)  | 15.5 (9.9 to 22.4)        | 0.3 (0.2 to 0.5)                   | 15.8 (10.1 to 22.9)                    | 0.4 (0.2 to 0.7)  | 13.8 (7.4 to 21.9)        | 0.3 (0.2 to 0.6)                   | 14.1 (7.5 to 22.4)                     |
| Madagascar | Diet high in red meat       | 0.3 (0.1 to 0.5)  | 10.8 (2.6 to 16.1)        | 0.2 (0.1 to 0.4)                   | 11.1 (2.7 to 16.5)                     | 0.3 (0.1 to 0.5)  | 8.4 (1.6 to 14.3)         | 0.2 (0 to 0.4)                     | 8.6 (1.6 to 14.8)                      |
| Madagascar | Low physical activity       | 0.1 (0 to 0.2)    | 1.7 (1.1 to 4.3)          | 0 (0 to 0.1)                       | 1.7 (1.1 to 4.4)                       | 0.1 (0 to 0.2)    | 1.9 (1.2 to 4.6)          | 0.1 (0 to 0.1)                     | 2 (1.2 to 4.7)                         |
| Madagascar | Smoking                     | 0.1 (0 to 0.2)    | 2.7 (1.2 to 4.4)          | 0.1 (0 to 0.1)                     | 2.8 (1.2 to 4.6)                       | 0.1 (0 to 0.1)    | 1.9 (0.9 to 3.2)          | 0.1 (0 to 0.1)                     | 1.9 (0.9 to 3.3)                       |
| Madagascar | Secondhand smoke            | 0.4 (0.1 to 0.7)  | 12.9 (2.9 to 24.2)        | 0.3 (0.1 to 0.5)                   | 13.2 (3 to 24.7)                       | 0.3 (0.1 to 0.7)  | 11 (2.4 to 22)            | 0.3 (0.1 to 0.5)                   | 11.3 (2.5 to 22.5)                     |
| Madagascar | Metabolic risks             | 0.6 (0.1 to 1.2)  | 11.2 (0.9 to 27)          | 0.3 (0.1 to 0.7)                   | 11.5 (1 to 27.6)                       | 1.1 (0.3 to 2.3)  | 22.5 (4.9 to 50.5)        | 0.7 (0.2 to 1.5)                   | 23.1 (5.1 to 51.8)                     |
| Madagascar | High body-mass index        | 0.1 (0 to 0.3)    | 0.9 (-3.9 to 5.6)         | 0.1 (0 to 0.2)                     | 0.9 (-3.9 to 5.7)                      | 0.4 (0.1 to 0.9)  | 6.3 (-2.1 to 17.1)        | 0.2 (0 to 0.5)                     | 6.6 (-2.1 to 17.6)                     |

| Location   | Risk factor                 | 1990             |                           |                                    |                                        | 2019             |                           |                                    |                                        |
|------------|-----------------------------|------------------|---------------------------|------------------------------------|----------------------------------------|------------------|---------------------------|------------------------------------|----------------------------------------|
|            |                             | Deaths           | YLLs (Years of Life Lost) | YLDs (Years Lived with Disability) | DALYs (Disability-Adjusted Life Years) | Deaths           | YLLs (Years of Life Lost) | YLDs (Years Lived with Disability) | DALYs (Disability-Adjusted Life Years) |
| Madagascar | High fasting plasma glucose | 0.4 (0.1 to 1)   | 10.5 (1.9 to 24.9)        | 0.3 (0 to 0.7)                     | 10.7 (1.9 to 25.6)                     | 0.7 (0.1 to 1.8) | 16.6 (3.1 to 43.1)        | 0.5 (0.1 to 1.2)                   | 17.1 (3.1 to 43.9)                     |
| Malawi     | All risk factors            | 1.5 (0.8 to 2.4) | 38.5 (22 to 61.2)         | 0.9 (0.5 to 1.6)                   | 39.5 (22.6 to 62.7)                    | 2.6 (1.5 to 4.1) | 59.1 (33.3 to 94.6)       | 1.6 (0.9 to 2.8)                   | 60.8 (34.5 to 97.3)                    |
| Malawi     | Behavioral risks            | 0.9 (0.6 to 1.3) | 27.7 (18.3 to 38.7)       | 0.6 (0.4 to 0.9)                   | 28.3 (18.6 to 39.5)                    | 1.3 (0.9 to 1.8) | 36.3 (22.9 to 51.5)       | 1 (0.5 to 1.5)                     | 37.2 (23.4 to 52.9)                    |
| Malawi     | Alcohol use                 | 0.4 (0.3 to 0.6) | 13.3 (8.2 to 19.5)        | 0.3 (0.2 to 0.5)                   | 13.6 (8.4 to 20)                       | 0.7 (0.4 to 1)   | 19.1 (11.4 to 28.7)       | 0.5 (0.3 to 0.8)                   | 19.6 (11.7 to 29.4)                    |
| Malawi     | Diet high in red meat       | 0.1 (0 to 0.1)   | 2.7 (0.9 to 4.3)          | 0.1 (0 to 0.1)                     | 2.8 (0.9 to 4.4)                       | 0.2 (0 to 0.3)   | 4.7 (1.1 to 7.7)          | 0.1 (0 to 0.2)                     | 4.8 (1.1 to 7.9)                       |
| Malawi     | Low physical activity       | 0.1 (0 to 0.1)   | 1.8 (1.1 to 3.7)          | 0 (0 to 0.1)                       | 1.8 (1.1 to 3.8)                       | 0.1 (0.1 to 0.2) | 2.3 (1.3 to 4.9)          | 0.1 (0 to 0.1)                     | 2.3 (1.3 to 5)                         |
| Malawi     | Smoking                     | 0.1 (0 to 0.2)   | 2.5 (1.1 to 4.3)          | 0.1 (0 to 0.1)                     | 2.5 (1.1 to 4.4)                       | 0.2 (0.1 to 0.3) | 3.3 (1.3 to 5.5)          | 0.1 (0 to 0.2)                     | 3.4 (1.3 to 5.7)                       |
| Malawi     | Secondhand smoke            | 0.2 (0.1 to 0.5) | 8.2 (1.8 to 15.3)         | 0.2 (0 to 0.3)                     | 8.3 (1.9 to 15.6)                      | 0.3 (0.1 to 0.5) | 7.9 (2 to 14.8)           | 0.2 (0 to 0.4)                     | 8.1 (2 to 15.1)                        |
| Malawi     | Metabolic risks             | 0.6 (0.1 to 1.4) | 11.6 (-0.8 to 31.3)       | 0.3 (0 to 0.8)                     | 11.9 (-0.7 to 31.9)                    | 1.4 (0.4 to 2.8) | 24.7 (4 to 56.1)          | 0.7 (0.2 to 1.6)                   | 25.5 (4.2 to 57.6)                     |
| Malawi     | High body-mass index        | 0.1 (0 to 0.3)   | -0.6 (-6 to 4.6)          | 0 (-0.1 to 0.2)                    | -0.6 (-6 to 4.8)                       | 0.5 (0 to 1.1)   | 5.9 (-5.2 to 18.4)        | 0.2 (-0.1 to 0.6)                  | 6.1 (-5.2 to 19)                       |
| Malawi     | High fasting plasma glucose | 0.5 (0.1 to 1.3) | 12.4 (2.1 to 30.9)        | 0.3 (0.1 to 0.8)                   | 12.7 (2.2 to 31.6)                     | 0.9 (0.2 to 2.2) | 19.5 (3.5 to 48.1)        | 0.6 (0.1 to 1.4)                   | 20.1 (3.6 to 49.5)                     |
| Malaysia   | All risk factors            | 5.2 (3 to 7.8)   | 142.6 (84.1 to 208.7)     | 4.6 (2.5 to 7.5)                   | 147.2 (86 to 215.4)                    | 8.3 (4.5 to 13)  | 206.7 (111.7 to 324.8)    | 10.9 (5.5 to 18)                   | 217.6 (119.1 to 342.3)                 |
| Malaysia   | Behavioral risks            | 1.9 (1.2 to 2.6) | 55.6 (33.5 to 78.3)       | 1.8 (0.9 to 2.7)                   | 57.4 (34.6 to 80.8)                    | 2 (1.2 to 3)     | 56.5 (30.5 to 84.8)       | 3 (1.5 to 4.9)                     | 59.5 (32 to 89.3)                      |
| Malaysia   | Alcohol use                 | 0.3 (0.2 to 0.4) | 8.3 (5 to 12)             | 0.3 (0.1 to 0.4)                   | 8.5 (5.2 to 12.4)                      | 0.2 (0.1 to 0.4) | 6.8 (3.6 to 10.7)         | 0.4 (0.2 to 0.6)                   | 7.1 (3.8 to 11.3)                      |
| Malaysia   | Diet high in red meat       | 0.4 (0.1 to 0.6) | 12.6 (2.4 to 17.8)        | 0.4 (0.1 to 0.7)                   | 13 (2.5 to 18.3)                       | 0.4 (0.1 to 0.6) | 12.1 (2.2 to 19)          | 0.6 (0.1 to 1.1)                   | 12.7 (2.3 to 20.2)                     |
| Malaysia   | Low physical activity       | 0.2 (0.1 to 0.4) | 4.6 (2.4 to 8.7)          | 0.2 (0.1 to 0.3)                   | 4.7 (2.5 to 9.1)                       | 0.3 (0.1 to 0.6) | 6.2 (2.9 to 11.6)         | 0.3 (0.1 to 0.7)                   | 6.5 (3.1 to 12.2)                      |
| Malaysia   | Smoking                     | 0.2 (0.1 to 0.3) | 4.3 (2.2 to 7)            | 0.1 (0.1 to 0.3)                   | 4.5 (2.2 to 7.3)                       | 0.2 (0.1 to 0.3) | 4.1 (2.3 to 6.5)          | 0.2 (0.1 to 0.4)                   | 4.4 (2.4 to 6.9)                       |
| Malaysia   | Secondhand smoke            | 0.9 (0.2 to 1.5) | 27.5 (6.8 to 48)          | 0.9 (0.2 to 1.6)                   | 28.4 (7 to 49.5)                       | 1 (0.2 to 1.8)   | 28.9 (7.3 to 52.9)        | 1.5 (0.3 to 2.9)                   | 30.4 (7.6 to 55.7)                     |
| Malaysia   | Metabolic risks             | 3.7 (1.5 to 6.5) | 95.2 (39.5 to 164)        | 3.1 (1.2 to 5.7)                   | 98.3 (40.8 to 169.5)                   | 6.8 (3 to 11.8)  | 163.2 (70.1 to 282.4)     | 8.6 (3.6 to 15.2)                  | 171.7 (73.9 to 295.6)                  |
| Malaysia   | High body-mass index        | 2.4 (0.7 to 4.8) | 66.1 (21.3 to 125.9)      | 2.1 (0.6 to 4.3)                   | 68.2 (21.9 to 129.5)                   | 4.9 (1.6 to 9.1) | 120.8 (39.2 to 224.7)     | 6.3 (2 to 12.3)                    | 127 (41.3 to 236.3)                    |
| Malaysia   | High fasting plasma glucose | 1.4 (0.3 to 3.3) | 33.4 (6.2 to 79.2)        | 1.1 (0.2 to 2.8)                   | 34.5 (6.4 to 81.5)                     | 2.4 (0.5 to 5.6) | 53.6 (10.3 to 126.8)      | 2.9 (0.5 to 7)                     | 56.5 (11 to 134)                       |
| Maldives   | All risk factors            | 2.9 (1.3 to 5.4) | 79.7 (34.4 to 147.4)      | 2.3 (1 to 4.3)                     | 82 (35.4 to 151.8)                     | 3.6 (1.9 to 5.4) | 85.5 (46.8 to 128.4)      | 5.3 (2.7 to 8.5)                   | 90.8 (49.9 to 136.9)                   |
| Maldives   | Behavioral risks            | 1.3 (0.6 to 2.1) | 37.2 (15.3 to 63.6)       | 1.1 (0.4 to 1.9)                   | 38.3 (15.8 to 65.2)                    | 1.1 (0.6 to 1.6) | 27 (14.8 to 41.1)         | 1.7 (0.8 to 2.8)                   | 28.7 (15.7 to 43.3)                    |
| Maldives   | Alcohol use                 | 0 (0 to 0.1)     | 1.2 (0 to 3.5)            | 0 (0 to 0.1)                       | 1.2 (0 to 3.6)                         | 0.1 (0 to 0.1)   | 2.4 (0.8 to 4.4)          | 0.2 (0 to 0.3)                     | 2.5 (0.9 to 4.7)                       |
| Maldives   | Diet high in red meat       | 0.1 (0 to 0.1)   | 2.6 (1 to 4.3)            | 0.1 (0 to 0.1)                     | 2.7 (1 to 4.4)                         | 0.1 (0 to 0.2)   | 2.9 (0.8 to 4.5)          | 0.2 (0.1 to 0.3)                   | 3.1 (0.9 to 4.8)                       |
| Maldives   | Low physical activity       | 0.2 (0.1 to 0.3) | 4 (1.7 to 8.3)            | 0.1 (0.1 to 0.3)                   | 4.1 (1.7 to 8.5)                       | 0.1 (0.1 to 0.3) | 3 (1.4 to 5.9)            | 0.2 (0.1 to 0.4)                   | 3.2 (1.5 to 6.2)                       |
| Maldives   | Smoking                     | 0.3 (0.1 to 0.5) | 7.2 (3.1 to 14)           | 0.2 (0.1 to 0.4)                   | 7.4 (3.2 to 14.4)                      | 0.2 (0.1 to 0.3) | 4.5 (2.5 to 7.1)          | 0.3 (0.1 to 0.5)                   | 4.8 (2.6 to 7.6)                       |
| Maldives   | Secondhand smoke            | 0.7 (0.1 to 1.4) | 22.9 (4.1 to 46.9)        | 0.6 (0.1 to 1.3)                   | 23.5 (4.2 to 48)                       | 0.5 (0.1 to 1)   | 14.8 (3.6 to 26)          | 0.9 (0.2 to 1.7)                   | 15.8 (3.9 to 27.6)                     |
| Maldives   | Metabolic risks             | 1.8 (0.5 to 4)   | 45.6 (11.5 to 104)        | 1.3 (0.3 to 3)                     | 47 (11.8 to 106.9)                     | 2.7 (1.1 to 4.6) | 63.6 (26.6 to 106.4)      | 3.9 (1.5 to 6.9)                   | 67.4 (28.2 to 112.9)                   |
| Maldives   | High body-mass index        | 0.9 (0.1 to 2.6) | 25.1 (3.9 to 71.6)        | 0.7 (0.1 to 2)                     | 25.8 (4.1 to 73.8)                     | 1.8 (0.5 to 3.5) | 45.1 (14.1 to 86.2)       | 2.7 (0.8 to 5.4)                   | 47.9 (14.9 to 91.4)                    |
| Maldives   | High fasting plasma glucose | 0.9 (0.2 to 2.3) | 21.7 (4.1 to 56.3)        | 0.7 (0.1 to 1.7)                   | 22.4 (4.2 to 57.9)                     | 1.1 (0.2 to 2.4) | 21.6 (4 to 49.9)          | 1.3 (0.2 to 3.3)                   | 22.9 (4.2 to 53)                       |
| Mali       | All risk factors            | 1.8 (1.1 to 2.7) | 49.3 (30.7 to 74.1)       | 1.1 (0.6 to 1.9)                   | 50.5 (31.5 to 75.7)                    | 2.8 (1.6 to 4.5) | 73.1 (41.4 to 114.4)      | 2.1 (1.1 to 3.4)                   | 75.2 (42.4 to 117.5)                   |
| Mali       | Behavioral risks            | 1.1 (0.7 to 1.4) | 33.3 (22 to 45.1)         | 0.7 (0.4 to 1.1)                   | 34.1 (22.4 to 45.9)                    | 1.4 (0.9 to 2)   | 42.5 (27.1 to 61.3)       | 1.1 (0.6 to 1.7)                   | 43.6 (27.8 to 63.1)                    |
| Mali       | Alcohol use                 | 0.3 (0.2 to 0.5) | 10.9 (7.3 to 15.3)        | 0.2 (0.1 to 0.4)                   | 11.1 (7.5 to 15.7)                     | 0.5 (0.3 to 0.7) | 14.4 (8.8 to 21.6)        | 0.4 (0.2 to 0.6)                   | 14.8 (9.2 to 22.2)                     |
| Mali       | Diet high in red meat       | 0.4 (0.1 to 0.5) | 11.2 (2.6 to 16.4)        | 0.2 (0.1 to 0.4)                   | 11.5 (2.7 to 16.8)                     | 0.5 (0.2 to 0.8) | 14.9 (4.7 to 23.3)        | 0.4 (0.1 to 0.7)                   | 15.3 (4.8 to 24)                       |
| Mali       | Low physical activity       | 0.1 (0.1 to 0.2) | 2.3 (1.3 to 4.7)          | 0.1 (0 to 0.1)                     | 2.4 (1.4 to 4.8)                       | 0.1 (0.1 to 0.2) | 2.8 (1.6 to 5.3)          | 0.1 (0 to 0.2)                     | 2.9 (1.6 to 5.5)                       |
| Mali       | Smoking                     | 0 (0 to 0.1)     | 1.2 (0.5 to 2.2)          | 0 (0 to 0.1)                       | 1.2 (0.5 to 2.2)                       | 0.1 (0 to 0.1)   | 2.1 (0.9 to 3.7)          | 0.1 (0 to 0.1)                     | 2.1 (0.9 to 3.8)                       |
| Mali       | Secondhand smoke            | 0.3 (0.1 to 0.5) | 8.6 (2 to 15.2)           | 0.2 (0 to 0.3)                     | 8.8 (2.1 to 15.4)                      | 0.3 (0.1 to 0.6) | 9.7 (2.2 to 17.8)         | 0.3 (0.1 to 0.5)                   | 10 (2.2 to 18.4)                       |
| Mali       | Metabolic risks             | 0.8 (0.2 to 1.6) | 17.2 (4.3 to 38.6)        | 0.4 (0.1 to 1)                     | 17.7 (4.4 to 39.3)                     | 1.5 (0.5 to 3.1) | 33.4 (8.6 to 71.4)        | 1 (0.3 to 2.1)                     | 34.4 (8.8 to 73.5)                     |
| Mali       | High body-mass index        | 0.2 (0 to 0.5)   | 4.4 (-0.5 to 12)          | 0.1 (0 to 0.3)                     | 4.6 (-0.5 to 12.3)                     | 0.5 (0.1 to 1.2) | 9.8 (-2.9 to 25.2)        | 0.3 (0 to 0.8)                     | 10.1 (-2.9 to 25.9)                    |

| Location         | Risk factor                 | 1990              |                           |                                    |                                        | 2019               |                           |                                    |                                        |
|------------------|-----------------------------|-------------------|---------------------------|------------------------------------|----------------------------------------|--------------------|---------------------------|------------------------------------|----------------------------------------|
|                  |                             | Deaths            | YLLs (Years of Life Lost) | YLDs (Years Lived with Disability) | DALYs (Disability-Adjusted Life Years) | Deaths             | YLLs (Years of Life Lost) | YLDs (Years Lived with Disability) | DALYs (Disability-Adjusted Life Years) |
| Mali             | High fasting plasma glucose | 0.5 (0.1 to 1.3)  | 13.1 (2.4 to 32)          | 0.3 (0.1 to 0.8)                   | 13.4 (2.4 to 32.8)                     | 1 (0.2 to 2.5)     | 24.7 (4.9 to 59.7)        | 0.7 (0.1 to 1.8)                   | 25.4 (5.1 to 61.3)                     |
| Malta            | All risk factors            | 10 (7.5 to 12.9)  | 256 (195.1 to 319.1)      | 17.3 (11.2 to 24.7)                | 273.3 (209.2 to 339.2)                 | 6.5 (4.7 to 8.9)   | 157.9 (114.9 to 212.2)    | 18.2 (11.1 to 27.5)                | 176.1 (128.1 to 237.5)                 |
| Malta            | Behavioral risks            | 7.1 (5.8 to 8.3)  | 198.5 (162.2 to 231.1)    | 13.2 (8.5 to 18.7)                 | 211.7 (172.6 to 247.1)                 | 4.2 (3.3 to 5.2)   | 115.3 (92.1 to 141.8)     | 13.1 (8.3 to 19.2)                 | 128.4 (102.6 to 156.9)                 |
| Malta            | Alcohol use                 | 2.7 (2.1 to 3.4)  | 76.6 (59.8 to 96)         | 5.1 (3.2 to 7.4)                   | 81.6 (63.5 to 102.1)                   | 1.8 (1.3 to 2.3)   | 49.6 (36.6 to 63.8)       | 5.6 (3.4 to 8.5)                   | 55.2 (40.8 to 70.4)                    |
| Malta            | Diet high in red meat       | 1.5 (0.7 to 2)    | 41.8 (19.2 to 56.1)       | 2.8 (1.2 to 4.4)                   | 44.6 (20.8 to 60)                      | 0.9 (0.4 to 1.3)   | 23.9 (10.4 to 34)         | 2.7 (1.1 to 4.4)                   | 26.6 (11.7 to 37.8)                    |
| Malta            | Low physical activity       | 1 (0.3 to 1.6)    | 22.5 (7.1 to 39.5)        | 1.6 (0.5 to 3)                     | 24.1 (7.5 to 42.5)                     | 0.6 (0.2 to 1.1)   | 14.4 (4.8 to 25)          | 1.7 (0.6 to 3.2)                   | 16.1 (5.3 to 28.2)                     |
| Malta            | Smoking                     | 1.9 (1.3 to 2.6)  | 56.7 (39.5 to 75.9)       | 3.7 (2.1 to 5.7)                   | 60.4 (41.8 to 81)                      | 1 (0.7 to 1.3)     | 29.4 (20.9 to 39.7)       | 3.3 (1.9 to 5.1)                   | 32.7 (23 to 44.2)                      |
| Malta            | Secondhand smoke            | 0.7 (0.2 to 1.2)  | 20.2 (4.6 to 35.7)        | 1.3 (0.3 to 2.5)                   | 21.5 (4.9 to 37.8)                     | 0.3 (0.1 to 0.5)   | 8.8 (2.1 to 15.6)         | 1 (0.2 to 1.9)                     | 9.8 (2.4 to 17.3)                      |
| Malta            | Metabolic risks             | 3.7 (1.3 to 7.1)  | 72.6 (21.1 to 146.8)      | 5.2 (1.5 to 10.8)                  | 77.9 (22.9 to 157.2)                   | 2.9 (1 to 5.5)     | 53.5 (14.3 to 109.5)      | 6.4 (1.7 to 13.4)                  | 59.9 (16 to 121.1)                     |
| Malta            | High body-mass index        | 1.3 (0.3 to 2.8)  | 22.3 (-0.9 to 53.1)       | 1.6 (0 to 3.7)                     | 23.9 (-0.8 to 56.5)                    | 1 (0.2 to 2)       | 13.6 (-3.8 to 35.8)       | 1.6 (-0.3 to 4)                    | 15.2 (-4.3 to 39.8)                    |
| Malta            | High fasting plasma glucose | 2.5 (0.5 to 5.5)  | 52.9 (10.2 to 118.3)      | 3.8 (0.7 to 9.2)                   | 56.7 (10.8 to 126.2)                   | 2.1 (0.4 to 4.6)   | 42.4 (8.3 to 96.3)        | 5.1 (1 to 12.1)                    | 47.5 (9.5 to 107.7)                    |
| Marshall Islands | All risk factors            | 7.1 (3.9 to 11.2) | 197.1 (111.8 to 309.5)    | 5.4 (2.8 to 8.9)                   | 202.6 (114.7 to 316.8)                 | 15 (7.4 to 25.2)   | 409.7 (200.4 to 699.4)    | 12 (5.7 to 20.6)                   | 421.7 (207.1 to 717)                   |
| Marshall Islands | Behavioral risks            | 2.5 (1.6 to 3.5)  | 75.4 (47.1 to 107.2)      | 2 (1.2 to 3)                       | 77.4 (48.3 to 110.2)                   | 4.1 (2.4 to 6.5)   | 123 (68.5 to 202.1)       | 3.5 (1.9 to 6.1)                   | 126.5 (70.8 to 207.9)                  |
| Marshall Islands | Alcohol use                 | 0.2 (0.1 to 0.4)  | 7.7 (3.1 to 13.9)         | 0.2 (0.1 to 0.4)                   | 7.9 (3.1 to 14.3)                      | 0.4 (0.2 to 0.9)   | 16.4 (6.3 to 32.9)        | 0.5 (0.2 to 1)                     | 16.8 (6.5 to 34)                       |
| Marshall Islands | Diet high in red meat       | 0.6 (0.2 to 0.9)  | 18.7 (4.9 to 28.5)        | 0.5 (0.1 to 0.8)                   | 19.2 (5.1 to 29.4)                     | 1 (0.2 to 1.7)     | 30.1 (8.2 to 52.9)        | 0.9 (0.2 to 1.6)                   | 31 (8.5 to 54.5)                       |
| Marshall Islands | Low physical activity       | 0.4 (0.2 to 0.8)  | 10.3 (3.7 to 20.4)        | 0.3 (0.1 to 0.6)                   | 10.6 (3.8 to 21.1)                     | 0.8 (0.3 to 1.5)   | 18.5 (6.1 to 38.7)        | 0.6 (0.2 to 1.2)                   | 19 (6.3 to 39.8)                       |
| Marshall Islands | Smoking                     | 0.5 (0.3 to 0.7)  | 13.7 (7.4 to 22.2)        | 0.4 (0.2 to 0.6)                   | 14 (7.7 to 22.7)                       | 0.7 (0.4 to 1.3)   | 20.5 (10.6 to 36.4)       | 0.6 (0.3 to 1.1)                   | 21.1 (10.9 to 37.4)                    |
| Marshall Islands | Secondhand smoke            | 0.9 (0.2 to 1.6)  | 28.2 (6.1 to 50)          | 0.7 (0.2 to 1.4)                   | 29 (6.3 to 51.4)                       | 1.4 (0.3 to 2.7)   | 42.7 (8.5 to 87.2)        | 1.2 (0.2 to 2.5)                   | 43.9 (8.8 to 89.5)                     |
| Marshall Islands | Metabolic risks             | 5.2 (1.9 to 9.4)  | 136.1 (51.4 to 249)       | 3.8 (1.4 to 7.3)                   | 139.9 (53 to 255.8)                    | 12.1 (4.6 to 22.4) | 320.7 (117.7 to 613)      | 9.4 (3.4 to 17.9)                  | 330.2 (121.1 to 631.2)                 |
| Marshall Islands | High body-mass index        | 2.7 (0.7 to 5.7)  | 71.3 (19.5 to 149.6)      | 2 (0.5 to 4.3)                     | 73.3 (20.2 to 153.7)                   | 6.1 (1.7 to 12.7)  | 158.5 (45.5 to 327.1)     | 4.7 (1.3 to 9.8)                   | 163.2 (46.5 to 337)                    |
| Marshall Islands | High fasting plasma glucose | 2.8 (0.6 to 6.3)  | 74.1 (15 to 169.2)        | 2.1 (0.4 to 4.9)                   | 76.1 (15.4 to 174.7)                   | 7.3 (1.7 to 16.8)  | 194.4 (43 to 458.6)       | 5.7 (1.3 to 13.5)                  | 200.1 (44.3 to 470.6)                  |
| Mauritania       | All risk factors            | 2.4 (1.3 to 3.8)  | 57.5 (30.5 to 91.6)       | 1.4 (0.7 to 2.4)                   | 59 (31.2 to 93.9)                      | 3.1 (1.7 to 5)     | 66.1 (33.4 to 109.5)      | 2.2 (1.1 to 3.9)                   | 68.4 (34.5 to 113.3)                   |
| Mauritania       | Behavioral risks            | 1.3 (0.7 to 1.9)  | 36.7 (20 to 56.5)         | 0.9 (0.5 to 1.4)                   | 37.5 (20.5 to 57.7)                    | 1.3 (0.8 to 2)     | 35.4 (19.7 to 53)         | 1.1 (0.6 to 1.8)                   | 36.6 (20.4 to 54.5)                    |
| Mauritania       | Alcohol use                 | 0 (0 to 0)        | 0.4 (0 to 1.1)            | 0 (0 to 0)                         | 0.4 (0 to 1.1)                         | 0 (0 to 0)         | 0 (0 to 0)                | 0 (0 to 0)                         | 0 (0 to 0)                             |
| Mauritania       | Diet high in red meat       | 0.5 (0.1 to 0.8)  | 14.8 (4.3 to 24.2)        | 0.3 (0.1 to 0.6)                   | 15.1 (4.4 to 24.8)                     | 0.5 (0.1 to 0.8)   | 14 (4.2 to 22.8)          | 0.4 (0.1 to 0.8)                   | 14.5 (4.3 to 23.6)                     |
| Mauritania       | Low physical activity       | 0.3 (0.1 to 0.6)  | 7.4 (2.9 to 14.7)         | 0.2 (0.1 to 0.4)                   | 7.6 (3 to 15.1)                        | 0.4 (0.1 to 0.7)   | 8.3 (2.9 to 16)           | 0.3 (0.1 to 0.6)                   | 8.6 (3 to 16.5)                        |
| Mauritania       | Smoking                     | 0.1 (0.1 to 0.2)  | 4.1 (1.8 to 7.5)          | 0.1 (0 to 0.2)                     | 4.2 (1.8 to 7.7)                       | 0.2 (0.1 to 0.3)   | 4.4 (1.8 to 7.8)          | 0.1 (0.1 to 0.3)                   | 4.5 (1.9 to 8.1)                       |
| Mauritania       | Secondhand smoke            | 0.4 (0.1 to 0.7)  | 11 (2.4 to 21.3)          | 0.2 (0.1 to 0.5)                   | 11.2 (2.5 to 21.8)                     | 0.3 (0.1 to 0.6)   | 9.7 (1.9 to 18.1)         | 0.3 (0.1 to 0.6)                   | 10 (2 to 18.6)                         |
| Mauritania       | Metabolic risks             | 1.2 (0.3 to 2.3)  | 22.6 (2.7 to 49)          | 0.6 (0.1 to 1.3)                   | 23.2 (3 to 50.5)                       | 1.9 (0.6 to 3.7)   | 33.2 (5.4 to 71.9)        | 1.2 (0.2 to 2.6)                   | 34.4 (5.6 to 74.3)                     |
| Mauritania       | High body-mass index        | 0.6 (0.1 to 1.3)  | 10 (-3.5 to 28.5)         | 0.3 (0 to 0.8)                     | 10.4 (-3.5 to 29.1)                    | 1 (0.2 to 2)       | 14 (-4.7 to 36.9)         | 0.5 (-0.1 to 1.4)                  | 14.5 (-4.7 to 38.2)                    |
| Mauritania       | High fasting plasma glucose | 0.6 (0.1 to 1.4)  | 13.1 (2.3 to 32.5)        | 0.3 (0.1 to 0.9)                   | 13.5 (2.4 to 33.3)                     | 1 (0.2 to 2.5)     | 20.7 (3.9 to 52.3)        | 0.7 (0.1 to 1.8)                   | 21.4 (4 to 53.8)                       |
| Mauritius        | All risk factors            | 3.4 (2.1 to 4.9)  | 89.7 (56.5 to 127.4)      | 3.6 (2 to 5.7)                     | 93.4 (58.5 to 133)                     | 8.1 (4.7 to 12.1)  | 209.4 (122.3 to 311.5)    | 11.2 (5.9 to 17.7)                 | 220.5 (129.7 to 327.6)                 |
| Mauritius        | Behavioral risks            | 1.3 (0.8 to 1.6)  | 37.1 (24 to 49.2)         | 1.5 (0.9 to 2.3)                   | 38.6 (25 to 51.2)                      | 2.2 (1.4 to 3)     | 63.9 (39.8 to 89.8)       | 3.4 (1.9 to 5.4)                   | 67.3 (41.9 to 94.8)                    |
| Mauritius        | Alcohol use                 | 0.4 (0.2 to 0.5)  | 11.2 (7.1 to 15.8)        | 0.4 (0.3 to 0.7)                   | 11.7 (7.4 to 16.5)                     | 0.6 (0.4 to 1)     | 19.4 (11 to 30)           | 1 (0.5 to 1.8)                     | 20.5 (11.5 to 31.7)                    |
| Mauritius        | Diet high in red meat       | 0.2 (0 to 0.3)    | 6.7 (1.2 to 9.1)          | 0.3 (0 to 0.4)                     | 7 (1.3 to 9.5)                         | 0.4 (0.1 to 0.6)   | 12.3 (2.5 to 19.2)        | 0.7 (0.1 to 1.1)                   | 13 (2.6 to 20.2)                       |
| Mauritius        | Low physical activity       | 0.1 (0.1 to 0.2)  | 2.4 (1.3 to 4.5)          | 0.1 (0 to 0.2)                     | 2.5 (1.4 to 4.7)                       | 0.2 (0.1 to 0.4)   | 4.9 (2.4 to 9.3)          | 0.3 (0.1 to 0.6)                   | 5.1 (2.5 to 9.7)                       |
| Mauritius        | Smoking                     | 0.1 (0.1 to 0.2)  | 3.6 (1.9 to 5.7)          | 0.1 (0.1 to 0.2)                   | 3.7 (2 to 6)                           | 0.2 (0.1 to 0.3)   | 4.9 (2.7 to 7.8)          | 0.3 (0.1 to 0.5)                   | 5.2 (2.9 to 8.2)                       |
| Mauritius        | Secondhand smoke            | 0.5 (0.1 to 0.8)  | 14.8 (3.5 to 25.6)        | 0.6 (0.1 to 1.1)                   | 15.4 (3.6 to 26.8)                     | 0.8 (0.2 to 1.5)   | 24.8 (5.9 to 45)          | 1.3 (0.3 to 2.6)                   | 26.1 (6.2 to 47.1)                     |

| Location                         | Risk factor                 | 1990              |                           |                                    |                                        | 2019               |                           |                                    |                                        |
|----------------------------------|-----------------------------|-------------------|---------------------------|------------------------------------|----------------------------------------|--------------------|---------------------------|------------------------------------|----------------------------------------|
|                                  |                             | Deaths            | YLLs (Years of Life Lost) | YLDs (Years Lived with Disability) | DALYs (Disability-Adjusted Life Years) | Deaths             | YLLs (Years of Life Lost) | YLDs (Years Lived with Disability) | DALYs (Disability-Adjusted Life Years) |
| Mauritius                        | Metabolic risks             | 2.4 (1.1 to 4)    | 58.9 (25.9 to 99.9)       | 2.4 (1 to 4.3)                     | 61.3 (26.9 to 104.2)                   | 6.6 (3 to 10.7)    | 161.8 (72.9 to 266.4)     | 8.6 (3.8 to 14.7)                  | 170.4 (77.1 to 280.5)                  |
| Mauritius                        | High body-mass index        | 1.6 (0.5 to 2.9)  | 40.7 (13.4 to 75)         | 1.7 (0.5 to 3.2)                   | 42.4 (14.1 to 78.2)                    | 4.3 (1.4 to 8)     | 108.1 (35.9 to 197.4)     | 5.7 (1.8 to 10.4)                  | 113.8 (38 to 208.6)                    |
| Mauritius                        | High fasting plasma glucose | 0.9 (0.2 to 2.1)  | 21.5 (4.1 to 49.2)        | 0.9 (0.2 to 2.1)                   | 22.4 (4.3 to 50.8)                     | 2.9 (0.6 to 6.4)   | 69.3 (14.6 to 153.9)      | 3.7 (0.8 to 8.9)                   | 73 (15.4 to 161.6)                     |
| Mexico                           | All risk factors            | 3.2 (2.1 to 4.5)  | 77.3 (50.2 to 109.6)      | 3.2 (1.9 to 4.9)                   | 80.5 (52.5 to 114.3)                   | 3.3 (2 to 5.1)     | 82.7 (48.8 to 127.2)      | 5.3 (2.9 to 8.6)                   | 88 (52.5 to 134.7)                     |
| Mexico                           | Behavioral risks            | 1.8 (1.4 to 2.1)  | 52.1 (40.2 to 63)         | 2 (1.3 to 2.8)                     | 54.1 (41.7 to 65.4)                    | 1.6 (1.2 to 2.1)   | 49.3 (36.3 to 65.2)       | 3 (1.9 to 4.3)                     | 52.3 (38.7 to 68.8)                    |
| Mexico                           | Alcohol use                 | 0.5 (0.4 to 0.7)  | 18.1 (13.9 to 22.5)       | 0.7 (0.4 to 1)                     | 18.8 (14.4 to 23.3)                    | 0.6 (0.5 to 0.9)   | 21.3 (15.4 to 28.6)       | 1.3 (0.8 to 1.8)                   | 22.5 (16.4 to 30.1)                    |
| Mexico                           | Diet high in red meat       | 0.4 (0.2 to 0.6)  | 13 (5.5 to 16.9)          | 0.5 (0.2 to 0.8)                   | 13.5 (5.7 to 17.6)                     | 0.5 (0.2 to 0.7)   | 14.5 (6.1 to 21.5)        | 0.9 (0.4 to 1.4)                   | 15.4 (6.5 to 22.5)                     |
| Mexico                           | Low physical activity       | 0.1 (0 to 0.2)    | 3 (1.3 to 6.4)            | 0.1 (0.1 to 0.3)                   | 3.2 (1.3 to 6.6)                       | 0.1 (0.1 to 0.2)   | 3 (1.3 to 6.4)            | 0.2 (0.1 to 0.4)                   | 3.2 (1.3 to 6.7)                       |
| Mexico                           | Smoking                     | 0.4 (0.3 to 0.6)  | 10.9 (6.4 to 16.1)        | 0.5 (0.2 to 0.7)                   | 11.4 (6.7 to 16.8)                     | 0.2 (0.1 to 0.3)   | 5.5 (2.8 to 8.7)          | 0.4 (0.2 to 0.6)                   | 5.8 (3 to 9.2)                         |
| Mexico                           | Secondhand smoke            | 0.3 (0.1 to 0.6)  | 10.4 (2.6 to 17.9)        | 0.4 (0.1 to 0.7)                   | 10.8 (2.6 to 18.6)                     | 0.2 (0.1 to 0.4)   | 7.6 (1.6 to 13.6)         | 0.5 (0.1 to 0.9)                   | 8.1 (1.8 to 14.4)                      |
| Mexico                           | Metabolic risks             | 1.6 (0.5 to 3.2)  | 29.8 (2.5 to 65.7)        | 1.4 (0.3 to 3)                     | 31.2 (2.8 to 68.3)                     | 1.9 (0.6 to 3.7)   | 38.4 (4.4 to 83)          | 2.7 (0.5 to 5.8)                   | 41 (4.9 to 87.9)                       |
| Mexico                           | High body-mass index        | 0.4 (0 to 0.9)    | 1.8 (-10.4 to 13.3)       | 0.2 (-0.3 to 0.7)                  | 2.1 (-10.6 to 13.9)                    | 0.6 (0 to 1.3)     | 5.2 (-10.4 to 21.1)       | 0.5 (-0.4 to 1.5)                  | 5.7 (-10.8 to 22.2)                    |
| Mexico                           | High fasting plasma glucose | 1.3 (0.3 to 2.8)  | 29.5 (5.9 to 63.3)        | 1.3 (0.3 to 2.9)                   | 30.8 (6.2 to 65.7)                     | 1.5 (0.3 to 3.2)   | 35.4 (6.9 to 79.3)        | 2.3 (0.4 to 5.4)                   | 37.7 (7.4 to 84.7)                     |
| Micronesia (Federated States of) | All risk factors            | 9.5 (5.5 to 14.5) | 267.3 (156.1 to 406.2)    | 7.1 (3.8 to 11.3)                  | 274.4 (160.6 to 416.6)                 | 17 (8.6 to 30)     | 455.2 (224.9 to 803.7)    | 14.9 (7.3 to 26.6)                 | 470.1 (233 to 824.6)                   |
| Micronesia (Federated States of) | Behavioral risks            | 3.7 (2.3 to 5.3)  | 110.4 (68.9 to 160.4)     | 2.9 (1.6 to 4.4)                   | 113.3 (70.8 to 164.8)                  | 5.5 (3 to 9.3)     | 154.7 (78.9 to 274.1)     | 5.1 (2.5 to 9.2)                   | 159.7 (82.2 to 283.5)                  |
| Micronesia (Federated States of) | Alcohol use                 | 0.2 (0.1 to 0.3)  | 5.8 (3 to 9.7)            | 0.1 (0.1 to 0.2)                   | 5.9 (3.1 to 9.9)                       | 0.2 (0.1 to 0.3)   | 6 (2.1 to 11.9)           | 0.2 (0.1 to 0.4)                   | 6.2 (2.2 to 12.3)                      |
| Micronesia (Federated States of) | Diet high in red meat       | 0.7 (0.2 to 1.1)  | 21.8 (6 to 35.1)          | 0.6 (0.1 to 1)                     | 22.3 (6.2 to 35.9)                     | 1 (0.2 to 1.9)     | 30.1 (7.1 to 60.2)        | 1 (0.2 to 2)                       | 31.1 (7.4 to 61.9)                     |
| Micronesia (Federated States of) | Low physical activity       | 0.5 (0.2 to 1)    | 13 (4.4 to 26.1)          | 0.4 (0.1 to 0.7)                   | 13.4 (4.5 to 26.9)                     | 0.9 (0.3 to 1.8)   | 20.7 (6.1 to 46.5)        | 0.7 (0.2 to 1.6)                   | 21.4 (6.3 to 47.9)                     |
| Micronesia (Federated States of) | Smoking                     | 1.4 (0.7 to 2.3)  | 41 (19.6 to 67.3)         | 1.1 (0.5 to 1.9)                   | 42.1 (20.1 to 69.1)                    | 2.2 (1 to 4)       | 59.2 (26.1 to 109.1)      | 2 (0.9 to 3.7)                     | 61.2 (26.9 to 112.8)                   |
| Micronesia (Federated States of) | Secondhand smoke            | 1.1 (0.3 to 2)    | 34.6 (8 to 61.9)          | 0.9 (0.2 to 1.7)                   | 35.4 (8.2 to 63.6)                     | 1.5 (0.3 to 3.3)   | 46.5 (9 to 103.2)         | 1.5 (0.3 to 3.2)                   | 48 (9.3 to 106.2)                      |
| Micronesia (Federated States of) | Metabolic risks             | 6.7 (2.7 to 11.7) | 182.4 (73.4 to 313.3)     | 4.9 (1.9 to 8.8)                   | 187.4 (75.4 to 321.6)                  | 13.3 (5.4 to 24.9) | 348.8 (140.2 to 657.1)    | 11.4 (4.6 to 21.5)                 | 360.2 (144.8 to 679.5)                 |
| Micronesia (Federated States of) | High body-mass index        | 5.2 (1.7 to 9.7)  | 143.4 (48.7 to 262.3)     | 3.9 (1.3 to 7.3)                   | 147.3 (49.9 to 269.5)                  | 9.1 (2.8 to 17.9)  | 241.5 (74.5 to 464.2)     | 7.8 (2.5 to 15.9)                  | 249.4 (76.9 to 476.9)                  |
| Micronesia (Federated States of) | High fasting plasma glucose | 1.9 (0.3 to 4.5)  | 49.2 (8.6 to 118.9)       | 1.3 (0.2 to 3.5)                   | 50.5 (8.8 to 121.9)                    | 5.6 (1.1 to 14.3)  | 142.1 (27.8 to 368.5)     | 4.7 (0.9 to 11.9)                  | 146.9 (28.6 to 379.9)                  |
| Monaco                           | All risk factors            | 8.8 (5.5 to 12.6) | 221.4 (136.9 to 320.9)    | 21.7 (11.9 to 34.9)                | 243.1 (150.4 to 351.2)                 | 10.1 (6.1 to 14.4) | 238.3 (138.8 to 347.6)    | 32.7 (17.8 to 50.8)                | 271 (157.4 to 394.5)                   |
| Monaco                           | Behavioral risks            | 6.8 (4.2 to 9.7)  | 190.5 (115.6 to 274.5)    | 18.4 (10 to 29.7)                  | 208.9 (126.5 to 301.1)                 | 7 (4.1 to 10.2)    | 188 (107.2 to 281.4)      | 25.7 (13.9 to 41.1)                | 213.7 (122.1 to 320.6)                 |
| Monaco                           | Alcohol use                 | 2.5 (0 to 4.7)    | 71.9 (1.1 to 137)         | 7 (0.1 to 14.5)                    | 78.9 (1.2 to 149.8)                    | 2.7 (0 to 5.2)     | 74.5 (0 to 144.5)         | 10.2 (0 to 21)                     | 84.7 (0 to 162.7)                      |
| Monaco                           | Diet high in red meat       | 1.8 (0.8 to 2.7)  | 47.6 (22.8 to 73.5)       | 4.6 (2.1 to 7.9)                   | 52.2 (24.9 to 80.8)                    | 1.9 (0.9 to 2.9)   | 50.1 (23.2 to 78.1)       | 6.9 (3.1 to 11.7)                  | 56.9 (27 to 89.4)                      |
| Monaco                           | Low physical activity       | 0.6 (0.2 to 1.1)  | 12.4 (3.8 to 24.8)        | 1.2 (0.4 to 2.8)                   | 13.6 (4.2 to 27.5)                     | 0.7 (0.2 to 1.3)   | 14.3 (4.6 to 27.5)        | 2 (0.6 to 4.2)                     | 16.3 (5.2 to 31.9)                     |
| Monaco                           | Smoking                     | 2.1 (1.3 to 3.1)  | 61.5 (38.3 to 88.5)       | 5.9 (3.2 to 9.5)                   | 67.4 (41.8 to 98.2)                    | 1.9 (1.2 to 2.9)   | 53.8 (32.8 to 79.5)       | 7.3 (4 to 12.4)                    | 61.1 (37.5 to 90)                      |
| Monaco                           | Secondhand smoke            | 0.6 (0.1 to 1)    | 17.1 (3.9 to 31.3)        | 1.6 (0.3 to 3)                     | 18.7 (4.2 to 34)                       | 0.5 (0.1 to 0.8)   | 13.9 (3.2 to 25.7)        | 1.9 (0.4 to 3.8)                   | 15.8 (3.5 to 29.2)                     |
| Monaco                           | Metabolic risks             | 2.5 (0.8 to 5.1)  | 40.4 (2.8 to 93.5)        | 4.3 (0.6 to 9.4)                   | 44.7 (3.7 to 101.9)                    | 3.9 (1.4 to 7.4)   | 65.3 (13.6 to 136)        | 9.1 (1.8 to 19)                    | 74.4 (15.4 to 151.6)                   |
| Monaco                           | High body-mass index        | 1.5 (0.3 to 3.4)  | 19.4 (-9.8 to 56.9)       | 2.1 (-0.7 to 5.9)                  | 21.5 (-10.6 to 62.5)                   | 1.9 (0.4 to 4)     | 25.3 (-6.9 to 64.7)       | 3.5 (-1 to 8.7)                    | 28.7 (-8.2 to 73.5)                    |
| Monaco                           | High fasting plasma glucose | 1.1 (0.2 to 2.7)  | 22.4 (4 to 56.3)          | 2.3 (0.4 to 6.1)                   | 24.8 (4.4 to 62.5)                     | 2.1 (0.4 to 5.1)   | 43.1 (7.9 to 104.8)       | 6 (1.1 to 15.3)                    | 49.2 (9.1 to 120)                      |
| Mongolia                         | All risk factors            | 1.5 (0.9 to 2.1)  | 43.6 (25.5 to 63.8)       | 1.4 (0.8 to 2.3)                   | 45 (26.5 to 65.6)                      | 2.1 (1.3 to 3.1)   | 55.7 (33.8 to 84)         | 2.3 (1.3 to 3.7)                   | 58 (35 to 87.8)                        |
| Mongolia                         | Behavioral risks            | 1.2 (0.7 to 1.8)  | 38 (23.3 to 57)           | 1.2 (0.7 to 1.9)                   | 39.2 (24 to 58.6)                      | 1.5 (1 to 2.2)     | 46 (29 to 68.2)           | 1.9 (1 to 3.1)                     | 47.8 (30.1 to 71.4)                    |
| Mongolia                         | Alcohol use                 | 0.2 (0.1 to 0.3)  | 7.3 (4.1 to 11.2)         | 0.2 (0.1 to 0.3)                   | 7.5 (4.2 to 11.6)                      | 0.4 (0.3 to 0.7)   | 14.8 (8.9 to 22.5)        | 0.6 (0.3 to 0.9)                   | 15.4 (9.2 to 23.3)                     |
| Mongolia                         | Diet high in red meat       | 0.6 (0.3 to 1.1)  | 19 (7.9 to 34.8)          | 0.6 (0.2 to 1.1)                   | 19.6 (8.2 to 36)                       | 0.7 (0.3 to 1.1)   | 19.4 (8.5 to 34.3)        | 0.8 (0.3 to 1.5)                   | 20.2 (8.8 to 35.6)                     |
| Mongolia                         | Low physical activity       | 0.1 (0 to 0.1)    | 1.4 (0.8 to 2.8)          | 0 (0 to 0.1)                       | 1.4 (0.9 to 2.9)                       | 0.1 (0 to 0.1)     | 1.6 (0.9 to 3.2)          | 0.1 (0 to 0.1)                     | 1.7 (0.9 to 3.4)                       |
| Mongolia                         | Smoking                     | 0.1 (0 to 0.1)    | 2.4 (1.1 to 3.9)          | 0.1 (0 to 0.1)                     | 2.4 (1.1 to 4)                         | 0.1 (0.1 to 0.2)   | 3.1 (1.5 to 5.2)          | 0.1 (0.1 to 0.2)                   | 3.3 (1.6 to 5.4)                       |

| Location   | Risk factor                 | 1990              |                           |                                    |                                        | 2019              |                           |                                    |                                        |
|------------|-----------------------------|-------------------|---------------------------|------------------------------------|----------------------------------------|-------------------|---------------------------|------------------------------------|----------------------------------------|
|            |                             | Deaths            | YLLs (Years of Life Lost) | YLDs (Years Lived with Disability) | DALYs (Disability-Adjusted Life Years) | Deaths            | YLLs (Years of Life Lost) | YLDs (Years Lived with Disability) | DALYs (Disability-Adjusted Life Years) |
| Mongolia   | Secondhand smoke            | 0.3 (0.1 to 0.5)  | 9.9 (2.3 to 18.2)         | 0.3 (0.1 to 0.6)                   | 10.2 (2.4 to 18.6)                     | 0.3 (0.1 to 0.6)  | 10 (2.2 to 18.5)          | 0.4 (0.1 to 0.8)                   | 10.4 (2.3 to 19.3)                     |
| Mongolia   | Metabolic risks             | 0.4 (0.1 to 0.8)  | 6.4 (-2 to 16.7)          | 0.3 (0 to 0.7)                     | 6.7 (-2 to 17.3)                       | 0.7 (0.2 to 1.3)  | 11.2 (-0.6 to 26.9)       | 0.5 (0 to 1.2)                     | 11.7 (-0.6 to 27.8)                    |
| Mongolia   | High body-mass index        | 0.2 (0 to 0.5)    | 2 (-5 to 10.1)            | 0.1 (-0.1 to 0.4)                  | 2.2 (-5.1 to 10.4)                     | 0.4 (0 to 0.8)    | 4 (-4.8 to 13.8)          | 0.2 (-0.2 to 0.6)                  | 4.2 (-5.1 to 14.4)                     |
| Mongolia   | High fasting plasma glucose | 0.2 (0 to 0.4)    | 4.5 (0.7 to 11.2)         | 0.2 (0 to 0.4)                     | 4.7 (0.8 to 11.6)                      | 0.3 (0.1 to 0.8)  | 7.6 (1.3 to 19.3)         | 0.3 (0.1 to 0.9)                   | 7.9 (1.4 to 20)                        |
| Montenegro | All risk factors            | 7.7 (5.5 to 10.5) | 203.6 (146.2 to 277.2)    | 12.9 (7.8 to 19.7)                 | 216.5 (154.9 to 297.1)                 | 9.4 (6.6 to 12.9) | 239.8 (169.4 to 328)      | 19.7 (12.1 to 29.4)                | 259.4 (182 to 351)                     |
| Montenegro | Behavioral risks            | 5.7 (4.3 to 7.4)  | 166.7 (126 to 215.6)      | 10.4 (6.5 to 15.7)                 | 177.1 (133.7 to 229.8)                 | 6.4 (4.8 to 8.1)  | 181.2 (136 to 234.3)      | 14.9 (9.5 to 22)                   | 196.1 (145.8 to 253.5)                 |
| Montenegro | Alcohol use                 | 2.5 (1.7 to 3.5)  | 77 (49.9 to 108)          | 4.8 (2.7 to 7.4)                   | 81.8 (53.1 to 114.5)                   | 2.2 (1.5 to 3.1)  | 66.6 (45 to 92.6)         | 5.5 (3.2 to 8.4)                   | 72.1 (48.7 to 100.1)                   |
| Montenegro | Diet high in red meat       | 1 (0.4 to 1.5)    | 29.8 (12.8 to 43.6)       | 1.9 (0.7 to 3)                     | 31.7 (13.4 to 46.1)                    | 1.2 (0.5 to 1.8)  | 34.4 (15.6 to 50.7)       | 2.8 (1.2 to 4.6)                   | 37.3 (17.1 to 54.8)                    |
| Montenegro | Low physical activity       | 0.2 (0.1 to 0.4)  | 5.4 (2.9 to 9.7)          | 0.3 (0.2 to 0.7)                   | 5.7 (3.1 to 10.3)                      | 0.3 (0.2 to 0.5)  | 6.2 (3.3 to 10.7)         | 0.5 (0.3 to 1)                     | 6.7 (3.6 to 11.6)                      |
| Montenegro | Smoking                     | 2 (1.3 to 2.8)    | 57.8 (38.4 to 81.3)       | 3.6 (2 to 5.9)                     | 61.4 (40.7 to 86.5)                    | 2.6 (1.9 to 3.5)  | 75 (52.5 to 103.8)        | 6.2 (3.6 to 9.7)                   | 81.2 (56.8 to 112.6)                   |
| Montenegro | Secondhand smoke            | 0.5 (0.1 to 0.9)  | 13.8 (3.2 to 24.7)        | 0.9 (0.2 to 1.6)                   | 14.6 (3.4 to 26.1)                     | 0.7 (0.2 to 1.2)  | 18.2 (4.2 to 33.1)        | 1.5 (0.3 to 2.9)                   | 19.7 (4.5 to 35.8)                     |
| Montenegro | Metabolic risks             | 2.7 (1 to 5)      | 49.7 (8.1 to 103.4)       | 3.3 (0.6 to 6.9)                   | 53 (8.9 to 109.9)                      | 4 (1.5 to 7.6)    | 79.5 (22.5 to 162.9)      | 6.4 (1.6 to 13)                    | 85.9 (24.6 to 175.7)                   |
| Montenegro | High body-mass index        | 1.3 (0.2 to 2.7)  | 19.6 (-7.2 to 51.2)       | 1.3 (-0.4 to 3.4)                  | 20.9 (-7.5 to 53.9)                    | 1.8 (0.4 to 3.7)  | 29.5 (-4 to 70.7)         | 2.3 (-0.5 to 5.7)                  | 31.8 (-4.6 to 76.3)                    |
| Montenegro | High fasting plasma glucose | 1.5 (0.3 to 3.4)  | 32.5 (5.8 to 77.9)        | 2.1 (0.4 to 5.2)                   | 34.6 (6.2 to 82.4)                     | 2.5 (0.5 to 5.5)  | 54.6 (10.4 to 126.8)      | 4.5 (0.8 to 10.9)                  | 59.1 (11.3 to 136)                     |
| Morocco    | All risk factors            | 2.2 (1.1 to 3.5)  | 60 (27 to 100.7)          | 1.8 (0.8 to 3.1)                   | 61.8 (27.7 to 103.7)                   | 4.1 (2 to 7)      | 105.9 (42.7 to 195.2)     | 4.4 (1.7 to 8.4)                   | 110.3 (44.5 to 203.4)                  |
| Morocco    | Behavioral risks            | 1.3 (0.7 to 1.8)  | 42.7 (24.1 to 63.4)       | 1.2 (0.6 to 1.9)                   | 43.9 (24.8 to 65.2)                    | 1.7 (0.9 to 2.6)  | 54.8 (29.5 to 85.2)       | 2.3 (1.2 to 3.7)                   | 57.1 (30.8 to 88.9)                    |
| Morocco    | Alcohol use                 | 0 (0 to 0)        | 0.2 (0.1 to 0.3)          | 0 (0 to 0)                         | 0.2 (0.1 to 0.3)                       | 0 (0 to 0)        | 0.2 (0.1 to 0.3)          | 0 (0 to 0)                         | 0.2 (0.1 to 0.3)                       |
| Morocco    | Diet high in red meat       | 0.3 (0.1 to 0.5)  | 11.3 (2.1 to 17)          | 0.3 (0.1 to 0.5)                   | 11.6 (2.2 to 17.5)                     | 0.5 (0.1 to 0.9)  | 18 (3.8 to 30.3)          | 0.7 (0.2 to 1.3)                   | 18.7 (3.9 to 31.6)                     |
| Morocco    | Low physical activity       | 0.3 (0.1 to 0.5)  | 8.1 (3.4 to 15.5)         | 0.2 (0.1 to 0.5)                   | 8.4 (3.5 to 15.9)                      | 0.4 (0.2 to 0.8)  | 12.4 (4.6 to 25.3)        | 0.5 (0.2 to 1.1)                   | 12.9 (4.8 to 26.5)                     |
| Morocco    | Smoking                     | 0.1 (0.1 to 0.1)  | 2.9 (1.5 to 4.7)          | 0.1 (0 to 0.1)                     | 2.9 (1.6 to 4.8)                       | 0.1 (0.1 to 0.2)  | 2.9 (1.5 to 4.8)          | 0.1 (0.1 to 0.2)                   | 3 (1.5 to 5)                           |
| Morocco    | Secondhand smoke            | 0.6 (0.2 to 1.1)  | 21.1 (5.4 to 37.5)        | 0.6 (0.1 to 1.1)                   | 21.7 (5.5 to 38.5)                     | 0.7 (0.1 to 1.2)  | 22.7 (5.2 to 43.3)        | 0.9 (0.2 to 1.9)                   | 23.6 (5.4 to 45.1)                     |
| Morocco    | Metabolic risks             | 1 (0.1 to 2.2)    | 18.7 (-10.1 to 55.1)      | 0.7 (-0.1 to 1.8)                  | 19.4 (-10.1 to 56.3)                   | 2.6 (0.5 to 5.5)  | 55.1 (-9 to 138.1)        | 2.3 (-0.4 to 5.9)                  | 57.4 (-9.5 to 143.7)                   |
| Morocco    | High body-mass index        | 0.2 (-0.3 to 0.8) | -3 (-22.5 to 12.9)        | 0 (-0.5 to 0.5)                    | -2.9 (-22.6 to 13.7)                   | 0.7 (-0.4 to 1.9) | 0.3 (-39 to 32.8)         | 0 (-1.7 to 1.4)                    | 0.3 (-40.6 to 34.2)                    |
| Morocco    | High fasting plasma glucose | 0.8 (0.1 to 1.9)  | 22.3 (4 to 53.4)          | 0.7 (0.1 to 1.7)                   | 22.9 (4.1 to 54.8)                     | 2 (0.4 to 4.7)    | 57.6 (11 to 139.4)        | 2.5 (0.4 to 6.2)                   | 60.1 (11.5 to 145.1)                   |
| Mozambique | All risk factors            | 1.4 (0.8 to 2.2)  | 32.7 (18.4 to 52.3)       | 0.8 (0.4 to 1.3)                   | 33.5 (18.9 to 53.5)                    | 2.8 (1.5 to 4.7)  | 65 (34 to 109.9)          | 1.7 (0.9 to 3)                     | 66.8 (34.9 to 112.7)                   |
| Mozambique | Behavioral risks            | 0.8 (0.5 to 1.1)  | 22.3 (13.7 to 32.4)       | 0.5 (0.3 to 0.7)                   | 22.7 (14 to 33.1)                      | 1.5 (1 to 2.3)    | 43.7 (25.9 to 67.7)       | 1.1 (0.6 to 1.8)                   | 44.8 (26.7 to 69.5)                    |
| Mozambique | Alcohol use                 | 0.2 (0.1 to 0.4)  | 7.2 (3.3 to 12.2)         | 0.1 (0.1 to 0.3)                   | 7.4 (3.3 to 12.4)                      | 0.7 (0.4 to 1.1)  | 21.1 (10.7 to 35)         | 0.5 (0.3 to 0.9)                   | 21.6 (11 to 35.9)                      |
| Mozambique | Diet high in red meat       | 0.1 (0 to 0.2)    | 3.2 (0.9 to 5)            | 0.1 (0 to 0.1)                     | 3.3 (1 to 5.1)                         | 0.2 (0.1 to 0.4)  | 5.8 (1.3 to 10.1)         | 0.1 (0 to 0.3)                     | 5.9 (1.3 to 10.4)                      |
| Mozambique | Low physical activity       | 0.1 (0 to 0.2)    | 1.7 (1 to 4.2)            | 0 (0 to 0.1)                       | 1.7 (1.1 to 4.3)                       | 0.1 (0.1 to 0.2)  | 2.4 (1.4 to 5.6)          | 0.1 (0 to 0.1)                     | 2.5 (1.4 to 5.8)                       |
| Mozambique | Smoking                     | 0.1 (0.1 to 0.2)  | 3.3 (1.5 to 5.6)          | 0.1 (0 to 0.1)                     | 3.4 (1.5 to 5.7)                       | 0.2 (0.1 to 0.4)  | 4.5 (1.9 to 8)            | 0.1 (0 to 0.2)                     | 4.6 (2 to 8.3)                         |
| Mozambique | Secondhand smoke            | 0.2 (0 to 0.4)    | 7.3 (1.5 to 13.7)         | 0.1 (0 to 0.3)                     | 7.4 (1.5 to 14)                        | 0.4 (0.1 to 0.7)  | 11 (2.2 to 21.3)          | 0.3 (0.1 to 0.5)                   | 11.3 (2.2 to 21.9)                     |
| Mozambique | Metabolic risks             | 0.6 (0.1 to 1.4)  | 11 (0.4 to 28.1)          | 0.3 (0 to 0.7)                     | 11.3 (0.4 to 28.8)                     | 1.4 (0.3 to 3)    | 23 (0.5 to 59.3)          | 0.7 (0.1 to 1.7)                   | 23.7 (0.7 to 60.9)                     |
| Mozambique | High body-mass index        | 0.1 (0 to 0.3)    | -0.3 (-3.9 to 3.3)        | 0 (0 to 0.1)                       | -0.3 (-4 to 3.4)                       | 0.3 (-0.1 to 0.9) | 0.8 (-11.1 to 13.5)       | 0.1 (-0.2 to 0.4)                  | 0.9 (-11.2 to 13.9)                    |
| Mozambique | High fasting plasma glucose | 0.5 (0.1 to 1.3)  | 11.5 (2.1 to 27.9)        | 0.3 (0 to 0.7)                     | 11.7 (2.2 to 28.6)                     | 1.1 (0.2 to 2.6)  | 22.6 (3.9 to 56.7)        | 0.6 (0.1 to 1.6)                   | 23.3 (4 to 58.1)                       |
| Myanmar    | All risk factors            | 6 (3.4 to 9.9)    | 178.1 (93.6 to 297.2)     | 4.1 (2.1 to 6.8)                   | 182.1 (95.9 to 303)                    | 4.6 (2.7 to 7.1)  | 118.6 (69.4 to 185.5)     | 4.1 (2.2 to 6.7)                   | 122.7 (71.6 to 191.9)                  |
| Myanmar    | Behavioral risks            | 3.4 (2 to 5.1)    | 103.6 (56.9 to 162.5)     | 2.3 (1.3 to 3.8)                   | 106 (58.6 to 166.1)                    | 1.6 (1.1 to 2.3)  | 44.7 (28.2 to 63.8)       | 1.5 (0.9 to 2.4)                   | 46.2 (29.2 to 65.8)                    |
| Myanmar    | Alcohol use                 | 0.1 (0 to 0.2)    | 2.8 (1.1 to 5.4)          | 0.1 (0 to 0.1)                     | 2.9 (1.1 to 5.5)                       | 0.2 (0.1 to 0.3)  | 6.2 (3.6 to 9.8)          | 0.2 (0.1 to 0.3)                   | 6.4 (3.8 to 10.1)                      |
| Myanmar    | Diet high in red meat       | 0.3 (0.1 to 0.5)  | 10 (2.6 to 17.1)          | 0.2 (0.1 to 0.4)                   | 10.2 (2.7 to 17.5)                     | 0.3 (0.1 to 0.5)  | 9.5 (1.9 to 14.8)         | 0.3 (0.1 to 0.5)                   | 9.8 (2 to 15.4)                        |
| Myanmar    | Low physical activity       | 0.2 (0.1 to 0.4)  | 5.6 (3.1 to 12.9)         | 0.1 (0.1 to 0.3)                   | 5.7 (3.2 to 13.2)                      | 0.1 (0.1 to 0.2)  | 2.7 (1.5 to 5.6)          | 0.1 (0 to 0.2)                     | 2.8 (1.6 to 5.8)                       |
| Myanmar    | Smoking                     | 1.5 (0.9 to 2.4)  | 38.1 (20.4 to 60.2)       | 0.9 (0.5 to 1.6)                   | 39 (21.1 to 61.7)                      | 0.5 (0.3 to 0.8)  | 10.8 (6.4 to 16.4)        | 0.4 (0.2 to 0.7)                   | 11.2 (6.6 to 17)                       |

| Location    | Risk factor                 | 1990              |                           |                                    |                                        | 2019               |                           |                                    |                                        |
|-------------|-----------------------------|-------------------|---------------------------|------------------------------------|----------------------------------------|--------------------|---------------------------|------------------------------------|----------------------------------------|
|             |                             | Deaths            | YLLs (Years of Life Lost) | YLDs (Years Lived with Disability) | DALYs (Disability-Adjusted Life Years) | Deaths             | YLLs (Years of Life Lost) | YLDs (Years Lived with Disability) | DALYs (Disability-Adjusted Life Years) |
| Myanmar     | Secondhand smoke            | 1.4 (0.3 to 2.7)  | 50 (10.6 to 100.6)        | 1.1 (0.2 to 2.1)                   | 51.1 (10.9 to 103.3)                   | 0.5 (0.1 to 1)     | 17.1 (3.9 to 32)          | 0.6 (0.1 to 1.1)                   | 17.7 (4.1 to 33.1)                     |
| Myanmar     | Metabolic risks             | 2.9 (0.9 to 6.3)  | 82.6 (24.3 to 180.1)      | 1.9 (0.5 to 4.1)                   | 84.6 (24.8 to 184)                     | 3.3 (1.3 to 5.7)   | 82 (33.1 to 143.5)        | 2.9 (1.2 to 5.2)                   | 84.8 (34.4 to 148.2)                   |
| Myanmar     | High body-mass index        | 1.2 (0.2 to 3.2)  | 34.4 (5.6 to 88.6)        | 0.8 (0.1 to 2.1)                   | 35.2 (5.7 to 90.9)                     | 2 (0.6 to 4)       | 51.8 (15 to 103.4)        | 1.8 (0.5 to 3.7)                   | 53.6 (15.5 to 107.3)                   |
| Myanmar     | High fasting plasma glucose | 1.8 (0.3 to 4.5)  | 50.2 (9.4 to 126)         | 1.2 (0.2 to 3)                     | 51.4 (9.6 to 129)                      | 1.5 (0.3 to 3.3)   | 34.7 (6.4 to 79.2)        | 1.2 (0.2 to 3)                     | 36 (6.6 to 81.7)                       |
| Namibia     | All risk factors            | 3.6 (2.4 to 5.3)  | 95.4 (58.7 to 139.8)      | 2.4 (1.4 to 3.8)                   | 97.8 (60.4 to 143.2)                   | 7.7 (4.7 to 11.5)  | 195.5 (115.7 to 299.7)    | 6.6 (3.5 to 10.6)                  | 202.2 (121.3 to 309.8)                 |
| Namibia     | Behavioral risks            | 2.5 (1.7 to 3.4)  | 73.3 (47 to 103.2)        | 1.8 (1 to 2.6)                     | 75.1 (48 to 105.4)                     | 4.9 (3.2 to 7.2)   | 142 (88.3 to 215.3)       | 4.7 (2.6 to 7.5)                   | 146.7 (91.4 to 221.2)                  |
| Namibia     | Alcohol use                 | 0.9 (0.5 to 1.3)  | 28.4 (16 to 43.6)         | 0.7 (0.3 to 1.1)                   | 29.1 (16.3 to 44.5)                    | 2.4 (1.5 to 3.8)   | 77.7 (46.5 to 121.9)      | 2.5 (1.3 to 4.3)                   | 80.2 (48.2 to 125.6)                   |
| Namibia     | Diet high in red meat       | 0.6 (0.2 to 0.9)  | 17.8 (6 to 27)            | 0.4 (0.1 to 0.7)                   | 18.2 (6.2 to 27.7)                     | 0.9 (0.3 to 1.5)   | 27 (8.2 to 47)            | 0.9 (0.3 to 1.6)                   | 27.9 (8.5 to 48.4)                     |
| Namibia     | Low physical activity       | 0.2 (0.1 to 0.3)  | 3.8 (1.9 to 7)            | 0.1 (0 to 0.2)                     | 3.9 (2 to 7.2)                         | 0.3 (0.1 to 0.6)   | 7.3 (3.2 to 14.2)         | 0.3 (0.1 to 0.5)                   | 7.5 (3.4 to 14.9)                      |
| Namibia     | Smoking                     | 0.6 (0.4 to 0.9)  | 13.6 (7.1 to 21.3)        | 0.4 (0.2 to 0.6)                   | 14 (7.3 to 22)                         | 0.9 (0.5 to 1.3)   | 17.5 (9.5 to 28.1)        | 0.6 (0.3 to 1.1)                   | 18.2 (9.8 to 29.2)                     |
| Namibia     | Secondhand smoke            | 0.4 (0.1 to 0.8)  | 14 (3.3 to 25.9)          | 0.3 (0.1 to 0.6)                   | 14.3 (3.4 to 26.4)                     | 0.7 (0.1 to 1.3)   | 20.9 (4.5 to 41)          | 0.7 (0.1 to 1.4)                   | 21.6 (4.6 to 42.3)                     |
| Namibia     | Metabolic risks             | 1.3 (0.4 to 2.7)  | 26.1 (1.7 to 59.5)        | 0.8 (0.1 to 1.7)                   | 26.8 (1.9 to 61.2)                     | 3.3 (1 to 6.5)     | 63.8 (10.4 to 137.1)      | 2.3 (0.4 to 5)                     | 66.1 (11 to 141.5)                     |
| Namibia     | High body-mass index        | 0.4 (0 to 1)      | 5 (-8.9 to 18.4)          | 0.2 (-0.1 to 0.6)                  | 5.2 (-9.1 to 18.9)                     | 1.3 (0.1 to 2.7)   | 17.2 (-14.3 to 49.1)      | 0.7 (-0.4 to 1.8)                  | 17.8 (-14.7 to 50.9)                   |
| Namibia     | High fasting plasma glucose | 0.9 (0.2 to 2.2)  | 21.9 (3.9 to 51.5)        | 0.6 (0.1 to 1.5)                   | 22.5 (4 to 52.9)                       | 2.1 (0.4 to 5.1)   | 49.5 (8.8 to 118.8)       | 1.7 (0.3 to 4.3)                   | 51.3 (9.1 to 123.2)                    |
| Nauru       | All risk factors            | 11.4 (6 to 17.9)  | 307.7 (164.8 to 480)      | 10.4 (5.5 to 17.1)                 | 318.1 (171.4 to 496)                   | 16.7 (9.2 to 25.3) | 446.1 (238.7 to 689.9)    | 18.1 (9.5 to 28.7)                 | 464.2 (250.2 to 713.4)                 |
| Nauru       | Behavioral risks            | 4.8 (2.7 to 7.2)  | 144.4 (82.1 to 218.5)     | 4.8 (2.6 to 7.7)                   | 149.2 (84.7 to 226.2)                  | 6.5 (4 to 9.7)     | 195.1 (116.3 to 292.2)    | 7.9 (4.3 to 12.6)                  | 203 (120.4 to 304.3)                   |
| Nauru       | Alcohol use                 | 0.4 (0.2 to 0.8)  | 16 (7.6 to 28.1)          | 0.5 (0.2 to 0.9)                   | 16.5 (7.8 to 29)                       | 0.9 (0.4 to 1.4)   | 30.7 (14.8 to 52.4)       | 1.2 (0.5 to 2.2)                   | 31.9 (15.4 to 54.7)                    |
| Nauru       | Diet high in red meat       | 1 (0.3 to 1.6)    | 29.6 (9.1 to 49.8)        | 1 (0.3 to 1.7)                     | 30.6 (9.4 to 51.3)                     | 1.2 (0.3 to 1.9)   | 34.9 (9.6 to 59.3)        | 1.4 (0.4 to 2.5)                   | 36.3 (9.9 to 61.3)                     |
| Nauru       | Low physical activity       | 0.5 (0.2 to 1)    | 11.4 (4 to 23.1)          | 0.4 (0.1 to 0.8)                   | 11.8 (4.1 to 23.9)                     | 0.7 (0.3 to 1.4)   | 16.5 (6 to 34.9)          | 0.7 (0.2 to 1.5)                   | 17.2 (6.2 to 36.4)                     |
| Nauru       | Smoking                     | 2 (0.9 to 3.3)    | 57.8 (27.1 to 97.1)       | 1.9 (0.8 to 3.5)                   | 59.8 (28.1 to 100.3)                   | 2.6 (1.4 to 4.3)   | 77.3 (38.8 to 128.9)      | 3.1 (1.4 to 5.5)                   | 80.5 (40.3 to 133.9)                   |
| Nauru       | Secondhand smoke            | 1.3 (0.3 to 2.4)  | 38.9 (8.3 to 76)          | 1.3 (0.3 to 2.5)                   | 40.2 (8.5 to 78)                       | 1.6 (0.3 to 3.1)   | 48.9 (9.9 to 94.6)        | 2 (0.4 to 3.9)                     | 50.8 (10.4 to 98.7)                    |
| Nauru       | Metabolic risks             | 7.8 (3 to 14.1)   | 196.7 (76.9 to 347.3)     | 6.8 (2.5 to 12.2)                  | 203.4 (79.3 to 362.4)                  | 12.1 (4.7 to 20.7) | 303 (117.3 to 531.7)      | 12.4 (4.7 to 22.3)                 | 315.4 (123 to 551.7)                   |
| Nauru       | High body-mass index        | 6.1 (2.1 to 12.1) | 154.7 (51.5 to 304)       | 5.3 (1.7 to 10.5)                  | 160 (53.5 to 313.6)                    | 8.4 (2.5 to 15.6)  | 208.1 (61.9 to 385.1)     | 8.5 (2.4 to 16.3)                  | 216.6 (64.7 to 400.4)                  |
| Nauru       | High fasting plasma glucose | 2.1 (0.4 to 5.2)  | 53.6 (8.8 to 131.9)       | 1.9 (0.3 to 4.9)                   | 55.4 (9.1 to 136.8)                    | 4.8 (1 to 11)      | 121.7 (24 to 284.3)       | 5 (1 to 12.6)                      | 126.7 (25.3 to 295.4)                  |
| Nepal       | All risk factors            | 1.9 (1 to 3)      | 52.9 (28.1 to 84.4)       | 1.2 (0.6 to 2)                     | 54.1 (28.9 to 86.4)                    | 3.3 (1.9 to 5.2)   | 87.4 (50.1 to 140.5)      | 2.8 (1.5 to 4.9)                   | 90.2 (51.6 to 145)                     |
| Nepal       | Behavioral risks            | 1.4 (0.8 to 2.1)  | 39.6 (22.3 to 59.5)       | 0.9 (0.5 to 1.5)                   | 40.5 (22.8 to 60.8)                    | 1.9 (1.2 to 2.8)   | 55.2 (34.5 to 80.6)       | 1.7 (1 to 2.7)                     | 56.9 (35.7 to 83.3)                    |
| Nepal       | Alcohol use                 | 0 (0 to 0.1)      | 1.7 (0.5 to 3.3)          | 0 (0 to 0.1)                       | 1.7 (0.5 to 3.4)                       | 0.4 (0.2 to 0.6)   | 13.6 (7.1 to 21.9)        | 0.4 (0.2 to 0.7)                   | 14 (7.3 to 22.7)                       |
| Nepal       | Diet high in red meat       | 0.2 (0 to 0.4)    | 7.7 (1.4 to 13.2)         | 0.2 (0 to 0.3)                     | 7.8 (1.4 to 13.4)                      | 0.3 (0.1 to 0.6)   | 10.2 (2 to 17.1)          | 0.3 (0.1 to 0.6)                   | 10.6 (2 to 17.6)                       |
| Nepal       | Low physical activity       | 0.1 (0.1 to 0.2)  | 3.1 (1.5 to 6)            | 0.1 (0 to 0.2)                     | 3.2 (1.5 to 6.2)                       | 0.2 (0.1 to 0.3)   | 4.5 (2.3 to 8.3)          | 0.1 (0.1 to 0.3)                   | 4.6 (2.4 to 8.6)                       |
| Nepal       | Smoking                     | 0.6 (0.3 to 1.1)  | 16.5 (6.9 to 28.4)        | 0.4 (0.2 to 0.7)                   | 16.9 (7.1 to 29)                       | 0.7 (0.3 to 1.1)   | 16.3 (7.5 to 26.8)        | 0.5 (0.2 to 0.9)                   | 16.8 (7.8 to 27.7)                     |
| Nepal       | Secondhand smoke            | 0.4 (0.1 to 0.7)  | 11.9 (2.7 to 22.7)        | 0.3 (0.1 to 0.5)                   | 12.2 (2.7 to 23.2)                     | 0.4 (0.1 to 0.8)   | 12.9 (2.8 to 24.2)        | 0.4 (0.1 to 0.8)                   | 13.3 (2.9 to 25)                       |
| Nepal       | Metabolic risks             | 0.6 (0.1 to 1.3)  | 14.9 (3 to 35.1)          | 0.4 (0.1 to 0.9)                   | 15.2 (3 to 35.9)                       | 1.5 (0.4 to 3.3)   | 36.1 (7.5 to 82.3)        | 1.2 (0.3 to 2.8)                   | 37.3 (7.8 to 84.9)                     |
| Nepal       | High body-mass index        | 0.1 (0 to 0.3)    | 1.5 (-0.7 to 5.8)         | 0 (0 to 0.2)                       | 1.5 (-0.7 to 5.9)                      | 0.4 (0 to 0.9)     | 5.9 (-3.6 to 19.2)        | 0.2 (-0.1 to 0.6)                  | 6.1 (-3.7 to 19.8)                     |
| Nepal       | High fasting plasma glucose | 0.5 (0.1 to 1.2)  | 13.5 (2.2 to 33.4)        | 0.3 (0.1 to 0.8)                   | 13.8 (2.3 to 34.1)                     | 1.2 (0.2 to 2.9)   | 31 (5.6 to 75.2)          | 1 (0.2 to 2.5)                     | 32 (5.8 to 78)                         |
| Netherlands | All risk factors            | 12 (10 to 14.1)   | 315.8 (268 to 363.3)      | 28.3 (19 to 38.6)                  | 344.1 (292.1 to 396.3)                 | 8.3 (6.6 to 10.2)  | 191.3 (155 to 230.5)      | 27.8 (17.9 to 42.2)                | 219.1 (176.7 to 265.3)                 |
| Netherlands | Behavioral risks            | 10 (8.6 to 11.4)  | 280.8 (242 to 317.7)      | 24.9 (16.8 to 34.4)                | 305.8 (261.9 to 347.4)                 | 6.4 (5.5 to 7.5)   | 161.5 (137.1 to 186.5)    | 23.5 (14.8 to 35.1)                | 184.9 (155.6 to 215.5)                 |
| Netherlands | Alcohol use                 | 4.9 (4 to 5.9)    | 137.8 (112.8 to 163.8)    | 12.2 (8 to 17.3)                   | 150 (122.8 to 178.7)                   | 3.5 (2.7 to 4.2)   | 87.5 (69.7 to 105.6)      | 12.7 (7.8 to 19.4)                 | 100.2 (80.3 to 122)                    |

| Location    | Risk factor                 | 1990               |                           |                                    |                                        | 2019             |                           |                                    |                                        |
|-------------|-----------------------------|--------------------|---------------------------|------------------------------------|----------------------------------------|------------------|---------------------------|------------------------------------|----------------------------------------|
|             |                             | Deaths             | YLLs (Years of Life Lost) | YLDs (Years Lived with Disability) | DALYs (Disability-Adjusted Life Years) | Deaths           | YLLs (Years of Life Lost) | YLDs (Years Lived with Disability) | DALYs (Disability-Adjusted Life Years) |
| Netherlands | Diet high in red meat       | 1.7 (0.9 to 2.3)   | 47.8 (24.5 to 64.1)       | 4.2 (1.9 to 6.7)                   | 52.1 (26.4 to 70.2)                    | 1.3 (0.6 to 1.7) | 32.1 (16.3 to 44)         | 4.6 (2.1 to 7.8)                   | 36.8 (19.1 to 50.8)                    |
| Netherlands | Low physical activity       | 0.2 (0.1 to 0.5)   | 5 (2.7 to 10.1)           | 0.5 (0.2 to 1)                     | 5.5 (2.9 to 11.1)                      | 0.2 (0.1 to 0.4) | 3.9 (1.9 to 7.6)          | 0.6 (0.3 to 1.2)                   | 4.4 (2.2 to 8.7)                       |
| Netherlands | Smoking                     | 3.8 (2.8 to 4.9)   | 106.8 (79 to 138)         | 9.5 (5.7 to 14.2)                  | 116.3 (85.5 to 149.2)                  | 1.9 (1.4 to 2.5) | 46.4 (33.1 to 60.1)       | 6.8 (3.9 to 10.8)                  | 53.2 (37.8 to 69.4)                    |
| Netherlands | Secondhand smoke            | 0.6 (0.1 to 1.1)   | 20.1 (4.5 to 35.1)        | 1.7 (0.4 to 3.3)                   | 21.8 (5 to 38)                         | 0.3 (0.1 to 0.5) | 9 (2.2 to 15.8)           | 1.3 (0.3 to 2.5)                   | 10.3 (2.5 to 18)                       |
| Netherlands | Metabolic risks             | 2.8 (1 to 5.1)     | 50.7 (12.6 to 101.5)      | 4.9 (1.3 to 9.7)                   | 55.6 (13.8 to 110.4)                   | 2.5 (0.9 to 4.6) | 42.1 (10.4 to 84.6)       | 6.2 (1.5 to 13)                    | 48.3 (11.8 to 95.9)                    |
| Netherlands | High body-mass index        | 1.4 (0.3 to 2.8)   | 21.7 (-2.1 to 51.6)       | 2.1 (-0.1 to 4.8)                  | 23.7 (-2.1 to 56.2)                    | 1.2 (0.3 to 2.6) | 17.1 (-2.2 to 43.4)       | 2.5 (-0.2 to 6.3)                  | 19.6 (-2.3 to 49.8)                    |
| Netherlands | High fasting plasma glucose | 1.5 (0.3 to 3.4)   | 30.7 (5.9 to 70.2)        | 2.9 (0.5 to 7.2)                   | 33.7 (6.4 to 77)                       | 1.4 (0.3 to 3.2) | 26.5 (5.1 to 61.7)        | 3.9 (0.7 to 10.1)                  | 30.5 (5.9 to 70.7)                     |
| New Zealand | All risk factors            | 11.3 (9.4 to 13.2) | 308.8 (257 to 357)        | 28.6 (19.3 to 39.9)                | 337.4 (281.9 to 392.2)                 | 6.5 (5.2 to 8.1) | 166 (132.8 to 199.2)      | 25.3 (15.5 to 37.2)                | 191.3 (151.3 to 231.3)                 |
| New Zealand | Behavioral risks            | 9.7 (8.3 to 11)    | 280.1 (238 to 319.6)      | 25.4 (16.9 to 35.1)                | 305.4 (258.9 to 349.9)                 | 5.1 (4.3 to 6)   | 142.1 (120.3 to 165.2)    | 21 (13.3 to 30.7)                  | 163.1 (136.2 to 190.5)                 |
| New Zealand | Alcohol use                 | 5.1 (4.1 to 6.3)   | 151.9 (123.7 to 185.1)    | 13.6 (9.1 to 19.3)                 | 165.5 (134 to 201.3)                   | 2.8 (2.2 to 3.4) | 79.1 (63.6 to 95.3)       | 11.6 (7.2 to 17.3)                 | 90.7 (73 to 110.4)                     |
| New Zealand | Diet high in red meat       | 2 (1 to 2.9)       | 57.2 (28.1 to 83.2)       | 5.2 (2.4 to 8.5)                   | 62.4 (30.4 to 91.2)                    | 1.2 (0.6 to 1.7) | 32.4 (15.7 to 46.6)       | 4.8 (2.2 to 8.1)                   | 37.2 (18.3 to 53.5)                    |
| New Zealand | Low physical activity       | 0.4 (0.1 to 0.7)   | 8.8 (3.6 to 17.9)         | 0.9 (0.3 to 2)                     | 9.6 (3.9 to 19.8)                      | 0.3 (0.1 to 0.6) | 7 (2.3 to 14)             | 1.1 (0.4 to 2.4)                   | 8.1 (2.7 to 16.3)                      |
| New Zealand | Smoking                     | 2.9 (2.1 to 3.7)   | 80.3 (57.8 to 104.3)      | 7.4 (4.4 to 11.1)                  | 87.7 (63.2 to 114)                     | 1.1 (0.8 to 1.5) | 30.3 (20.8 to 40.6)       | 4.6 (2.5 to 7.4)                   | 34.9 (23.7 to 47)                      |
| New Zealand | Secondhand smoke            | 0.5 (0.1 to 0.9)   | 16.6 (4.1 to 28.6)        | 1.4 (0.3 to 2.6)                   | 17.9 (4.4 to 31.1)                     | 0.3 (0.1 to 0.4) | 8.2 (1.8 to 14.7)         | 1.1 (0.2 to 2.2)                   | 9.4 (2.1 to 16.4)                      |
| New Zealand | Metabolic risks             | 2.3 (0.7 to 4.2)   | 42.1 (5.5 to 88.6)        | 4.6 (1.1 to 9.2)                   | 46.8 (6.7 to 97.9)                     | 1.9 (0.7 to 3.6) | 33 (3.8 to 69)            | 5.9 (1.3 to 12.2)                  | 38.9 (5.7 to 80.1)                     |
| New Zealand | High body-mass index        | 1.2 (0.2 to 2.6)   | 17.9 (-8.4 to 48.1)       | 2.3 (-0.2 to 5.5)                  | 20.2 (-8.7 to 53.3)                    | 1 (0.1 to 2)     | 12.4 (-7.6 to 33.9)       | 2.6 (-0.3 to 6.2)                  | 15 (-7.9 to 39.2)                      |
| New Zealand | High fasting plasma glucose | 1.1 (0.2 to 2.5)   | 25.4 (4.7 to 58.4)        | 2.5 (0.4 to 6.2)                   | 27.9 (5.2 to 64.3)                     | 1 (0.2 to 2.3)   | 21.8 (4 to 50.3)          | 3.5 (0.6 to 8.8)                   | 25.4 (4.9 to 58.6)                     |
| Nicaragua   | All risk factors            | 1.1 (0.6 to 1.7)   | 28.2 (14.7 to 45.6)       | 1.1 (0.5 to 2)                     | 29.3 (15.3 to 47.4)                    | 2.4 (1.3 to 4)   | 53.9 (28.5 to 91.1)       | 3.5 (1.6 to 6.2)                   | 57.3 (30.3 to 96.5)                    |
| Nicaragua   | Behavioral risks            | 0.5 (0.3 to 0.7)   | 16.4 (10.8 to 22)         | 0.6 (0.3 to 0.9)                   | 17 (11.2 to 22.9)                      | 0.8 (0.5 to 1)   | 20.8 (13.6 to 29)         | 1.3 (0.7 to 1.9)                   | 22 (14.5 to 30.6)                      |
| Nicaragua   | Alcohol use                 | 0.1 (0.1 to 0.1)   | 3.5 (2.4 to 4.8)          | 0.1 (0.1 to 0.2)                   | 3.6 (2.5 to 4.9)                       | 0.2 (0.1 to 0.3) | 5.8 (4 to 8.1)            | 0.3 (0.2 to 0.5)                   | 6.2 (4.3 to 8.6)                       |
| Nicaragua   | Diet high in red meat       | 0.1 (0 to 0.2)     | 3.4 (0.7 to 4.9)          | 0.1 (0 to 0.2)                     | 3.5 (0.7 to 5.1)                       | 0.1 (0 to 0.2)   | 3.8 (0.8 to 6)            | 0.2 (0.1 to 0.4)                   | 4 (0.8 to 6.3)                         |
| Nicaragua   | Low physical activity       | 0 (0 to 0.1)       | 1 (0.6 to 2.2)            | 0 (0 to 0.1)                       | 1 (0.6 to 2.3)                         | 0.1 (0 to 0.1)   | 1.6 (0.9 to 3.4)          | 0.1 (0 to 0.2)                     | 1.7 (0.9 to 3.6)                       |
| Nicaragua   | Smoking                     | 0.1 (0.1 to 0.2)   | 3.8 (2 to 6)              | 0.1 (0.1 to 0.2)                   | 3.9 (2.1 to 6.2)                       | 0.1 (0.1 to 0.2) | 3.8 (1.9 to 5.9)          | 0.2 (0.1 to 0.4)                   | 4 (2 to 6.3)                           |
| Nicaragua   | Secondhand smoke            | 0.2 (0 to 0.3)     | 5.2 (1.2 to 9.1)          | 0.2 (0 to 0.3)                     | 5.4 (1.3 to 9.4)                       | 0.2 (0.1 to 0.4) | 6.4 (1.4 to 11.5)         | 0.4 (0.1 to 0.7)                   | 6.7 (1.5 to 12.1)                      |
| Nicaragua   | Metabolic risks             | 0.6 (0.2 to 1.2)   | 12.6 (0.4 to 29.1)        | 0.6 (0.1 to 1.3)                   | 13.2 (0.5 to 30.2)                     | 1.8 (0.7 to 3.4) | 35.3 (9.7 to 72.3)        | 2.3 (0.7 to 5)                     | 37.6 (10.5 to 76.8)                    |
| Nicaragua   | High body-mass index        | 0.2 (0 to 0.4)     | 1.2 (-5.2 to 7.2)         | 0.1 (-0.1 to 0.4)                  | 1.3 (-5.3 to 7.5)                      | 0.6 (0.1 to 1.3) | 8.9 (-2.8 to 22.4)        | 0.7 (-0.1 to 1.6)                  | 9.6 (-2.9 to 24.1)                     |
| Nicaragua   | High fasting plasma glucose | 0.5 (0.1 to 1.1)   | 11.9 (2.2 to 26.7)        | 0.5 (0.1 to 1.2)                   | 12.4 (2.3 to 27.9)                     | 1.3 (0.3 to 2.8) | 28.1 (5.6 to 63.9)        | 1.8 (0.3 to 4.3)                   | 29.9 (5.9 to 68.7)                     |
| Niger       | All risk factors            | 0.9 (0.5 to 1.5)   | 24.6 (14 to 38.4)         | 0.6 (0.3 to 1)                     | 25.2 (14.3 to 39.3)                    | 1.4 (0.7 to 2.5) | 33.7 (16.8 to 60)         | 0.9 (0.4 to 1.7)                   | 34.6 (17.3 to 61.3)                    |
| Niger       | Behavioral risks            | 0.6 (0.3 to 0.9)   | 18 (9.7 to 27.4)          | 0.4 (0.2 to 0.6)                   | 18.4 (10 to 28.1)                      | 0.7 (0.4 to 1.1) | 19.5 (10.2 to 31.4)       | 0.5 (0.2 to 0.9)                   | 20 (10.5 to 32.2)                      |
| Niger       | Alcohol use                 | 0.1 (0 to 0.2)     | 2.9 (1.3 to 5)            | 0.1 (0 to 0.1)                     | 2.9 (1.3 to 5.1)                       | 0.1 (0 to 0.2)   | 3.3 (1.4 to 6.1)          | 0.1 (0 to 0.2)                     | 3.3 (1.5 to 6.2)                       |
| Niger       | Diet high in red meat       | 0.3 (0.1 to 0.4)   | 8 (2.1 to 12.6)           | 0.2 (0 to 0.3)                     | 8.1 (2.1 to 12.9)                      | 0.3 (0.1 to 0.5) | 8.5 (2.1 to 14.8)         | 0.2 (0.1 to 0.4)                   | 8.7 (2.2 to 15.2)                      |
| Niger       | Low physical activity       | 0.1 (0 to 0.2)     | 2 (1 to 3.7)              | 0 (0 to 0.1)                       | 2 (1 to 3.8)                           | 0.1 (0 to 0.2)   | 2.2 (1 to 4.4)            | 0.1 (0 to 0.1)                     | 2.3 (1.1 to 4.5)                       |
| Niger       | Smoking                     | 0 (0 to 0)         | 0.5 (0.2 to 0.9)          | 0 (0 to 0)                         | 0.5 (0.2 to 0.9)                       | 0 (0 to 0)       | 0.7 (0.3 to 1.3)          | 0 (0 to 0)                         | 0.7 (0.3 to 1.4)                       |
| Niger       | Secondhand smoke            | 0.2 (0 to 0.3)     | 5.1 (1.2 to 9.5)          | 0.1 (0 to 0.2)                     | 5.2 (1.2 to 9.8)                       | 0.2 (0 to 0.3)   | 5.3 (1.2 to 10.4)         | 0.1 (0 to 0.3)                     | 5.5 (1.3 to 10.7)                      |
| Niger       | Metabolic risks             | 0.4 (0.1 to 0.8)   | 7 (0.7 to 17)             | 0.2 (0 to 0.4)                     | 7.2 (0.7 to 17.4)                      | 0.8 (0.2 to 1.7) | 15.1 (3 to 35.3)          | 0.5 (0.1 to 1)                     | 15.6 (3.1 to 36.1)                     |
| Niger       | High body-mass index        | 0.1 (0 to 0.4)     | 2.3 (-1.3 to 7.5)         | 0.1 (0 to 0.2)                     | 2.3 (-1.3 to 7.7)                      | 0.3 (0 to 0.6)   | 4.1 (-1.7 to 11.8)        | 0.1 (0 to 0.4)                     | 4.3 (-1.7 to 12.1)                     |
| Niger       | High fasting plasma glucose | 0.2 (0 to 0.6)     | 4.9 (0.8 to 12.3)         | 0.1 (0 to 0.3)                     | 5 (0.8 to 12.7)                        | 0.5 (0.1 to 1.4) | 11.3 (1.9 to 30)          | 0.3 (0.1 to 0.9)                   | 11.7 (2 to 31)                         |
| Nigeria     | All risk factors            | 2.4 (1.3 to 3.8)   | 59 (33.1 to 94.2)         | 1.5 (0.8 to 2.6)                   | 60.6 (34.4 to 96.6)                    | 4 (2.3 to 6.4)   | 92.1 (50.4 to 148.3)      | 2.9 (1.5 to 4.8)                   | 95 (52 to 152.8)                       |
| Nigeria     | Behavioral risks            | 1.4 (0.9 to 2.1)   | 40 (25.7 to 60.6)         | 1 (0.6 to 1.6)                     | 41 (26.5 to 61.9)                      | 2.1 (1.4 to 3)   | 55.9 (34.9 to 82.5)       | 1.7 (1 to 2.7)                     | 57.6 (36.5 to 84.8)                    |

| Location                 | Risk factor                 | 1990               |                           |                                    |                                        | 2019               |                           |                                    |                                        |
|--------------------------|-----------------------------|--------------------|---------------------------|------------------------------------|----------------------------------------|--------------------|---------------------------|------------------------------------|----------------------------------------|
|                          |                             | Deaths             | YLLs (Years of Life Lost) | YLDs (Years Lived with Disability) | DALYs (Disability-Adjusted Life Years) | Deaths             | YLLs (Years of Life Lost) | YLDs (Years Lived with Disability) | DALYs (Disability-Adjusted Life Years) |
| Nigeria                  | Alcohol use                 | 0.7 (0.4 to 1.1)   | 19.9 (11.3 to 32.5)       | 0.5 (0.2 to 0.9)                   | 20.4 (11.6 to 33.3)                    | 1.1 (0.7 to 1.8)   | 30.6 (17.9 to 47.3)       | 1 (0.5 to 1.6)                     | 31.6 (18.7 to 48.8)                    |
| Nigeria                  | Diet high in red meat       | 0.2 (0 to 0.4)     | 6.3 (1.3 to 10.6)         | 0.2 (0 to 0.3)                     | 6.5 (1.4 to 10.9)                      | 0.3 (0.1 to 0.6)   | 9.8 (2 to 17)             | 0.3 (0.1 to 0.5)                   | 10.1 (2.1 to 17.3)                     |
| Nigeria                  | Low physical activity       | 0.2 (0.1 to 0.3)   | 4 (2 to 7.7)              | 0.1 (0 to 0.2)                     | 4.2 (2.1 to 7.9)                       | 0.3 (0.1 to 0.5)   | 5.9 (2.7 to 11.3)         | 0.2 (0.1 to 0.4)                   | 6.1 (2.8 to 11.6)                      |
| Nigeria                  | Smoking                     | 0.1 (0.1 to 0.2)   | 2.7 (1.2 to 4.7)          | 0.1 (0 to 0.1)                     | 2.8 (1.3 to 4.9)                       | 0.1 (0.1 to 0.2)   | 2.5 (1.2 to 4.5)          | 0.1 (0 to 0.1)                     | 2.6 (1.3 to 4.7)                       |
| Nigeria                  | Secondhand smoke            | 0.3 (0.1 to 0.5)   | 8.1 (1.9 to 15.4)         | 0.2 (0 to 0.4)                     | 8.3 (1.9 to 15.7)                      | 0.3 (0.1 to 0.5)   | 8.5 (1.8 to 16.2)         | 0.2 (0 to 0.5)                     | 8.7 (1.8 to 16.6)                      |
| Nigeria                  | Metabolic risks             | 1 (0.3 to 2.2)     | 20.6 (3.8 to 47.2)        | 0.6 (0.1 to 1.3)                   | 21.2 (3.9 to 48.3)                     | 2.1 (0.7 to 4.2)   | 39.5 (8.6 to 86.5)        | 1.3 (0.3 to 2.9)                   | 40.8 (9.1 to 88.7)                     |
| Nigeria                  | High body-mass index        | 0.3 (0 to 0.9)     | 5.5 (-2.4 to 16.6)        | 0.2 (0 to 0.5)                     | 5.7 (-2.4 to 17.1)                     | 0.9 (0.1 to 2)     | 13.7 (-5.4 to 37.4)       | 0.5 (-0.1 to 1.2)                  | 14.1 (-5.5 to 38.4)                    |
| Nigeria                  | High fasting plasma glucose | 0.7 (0.1 to 1.7)   | 15.4 (2.7 to 39.5)        | 0.4 (0.1 to 1.1)                   | 15.9 (2.8 to 40.3)                     | 1.3 (0.2 to 3.1)   | 27.1 (4.6 to 65.8)        | 0.9 (0.1 to 2.2)                   | 28 (4.7 to 67.9)                       |
| Niue                     | All risk factors            | 9 (5.1 to 13.6)    | 236.3 (137.2 to 358.7)    | 8.9 (4.9 to 14.2)                  | 245.2 (142.7 to 370.7)                 | 13.3 (7 to 21.1)   | 337.8 (182.7 to 533.8)    | 17.5 (9.1 to 28.6)                 | 355.3 (194 to 561.3)                   |
| Niue                     | Behavioral risks            | 3.1 (2 to 4.6)     | 93.2 (55.8 to 139.8)      | 3.5 (1.9 to 5.4)                   | 96.7 (57.9 to 145.6)                   | 3.8 (2.2 to 5.5)   | 109.2 (62.6 to 162.7)     | 5.7 (3.1 to 9)                     | 114.9 (66.5 to 170.5)                  |
| Niue                     | Alcohol use                 | 0.4 (0.1 to 0.7)   | 14.6 (5.1 to 26.2)        | 0.5 (0.2 to 1)                     | 15.1 (5.2 to 27.2)                     | 0.5 (0.1 to 1)     | 19 (4.9 to 35.8)          | 1 (0.3 to 2)                       | 20 (5.2 to 37.7)                       |
| Niue                     | Diet high in red meat       | 0.7 (0.2 to 1.1)   | 20.7 (6.5 to 34.2)        | 0.8 (0.2 to 1.3)                   | 21.5 (6.7 to 35.3)                     | 0.9 (0.3 to 1.4)   | 25.1 (7.6 to 42.3)        | 1.3 (0.4 to 2.4)                   | 26.4 (8.1 to 44.5)                     |
| Niue                     | Low physical activity       | 0.4 (0.2 to 0.8)   | 9.1 (3.4 to 18.9)         | 0.3 (0.1 to 0.7)                   | 9.4 (3.5 to 19.6)                      | 0.6 (0.2 to 1.1)   | 13 (4.4 to 26.5)          | 0.7 (0.2 to 1.4)                   | 13.7 (4.6 to 28.1)                     |
| Niue                     | Smoking                     | 0.8 (0.4 to 1.3)   | 23.5 (11.9 to 37.6)       | 0.9 (0.4 to 1.5)                   | 24.3 (12.4 to 39.2)                    | 0.9 (0.5 to 1.4)   | 24.2 (12.6 to 39)         | 1.3 (0.6 to 2.1)                   | 25.4 (13.4 to 41.3)                    |
| Niue                     | Secondhand smoke            | 1 (0.2 to 1.9)     | 30.5 (6.8 to 57.5)        | 1.1 (0.2 to 2.2)                   | 31.6 (7 to 59.7)                       | 1.2 (0.3 to 2.2)   | 34 (7.5 to 65.6)          | 1.8 (0.4 to 3.5)                   | 35.7 (7.9 to 68.8)                     |
| Niue                     | Metabolic risks             | 6.7 (2.8 to 11.5)  | 165.1 (70.3 to 284.1)     | 6.3 (2.6 to 11)                    | 171.4 (73.3 to 295.4)                  | 10.9 (4.7 to 18.5) | 263.4 (112.3 to 458)      | 13.6 (6 to 24.4)                   | 277 (118.6 to 478.7)                   |
| Niue                     | High body-mass index        | 4.8 (1.6 to 9.1)   | 118.1 (39.7 to 221.5)     | 4.5 (1.5 to 8.4)                   | 122.6 (41.3 to 229.7)                  | 7.3 (2.3 to 13.9)  | 172.6 (55 to 324.2)       | 8.8 (2.7 to 16.8)                  | 181.4 (58.6 to 338.4)                  |
| Niue                     | High fasting plasma glucose | 2.5 (0.5 to 5.7)   | 60 (11.3 to 140.3)        | 2.3 (0.4 to 5.7)                   | 62.3 (11.7 to 145.4)                   | 5 (1.1 to 11.4)    | 122.2 (26.6 to 284.2)     | 6.4 (1.3 to 15.5)                  | 128.6 (27.6 to 297.6)                  |
| North Macedonia          | All risk factors            | 6.2 (4.5 to 8.1)   | 171.8 (125.1 to 222.8)    | 7.9 (4.9 to 11.6)                  | 179.7 (132.1 to 232.3)                 | 7.9 (5 to 11.9)    | 186 (118.3 to 278.6)      | 13 (7.4 to 21.2)                   | 199 (126.9 to 298.2)                   |
| North Macedonia          | Behavioral risks            | 4.4 (3.5 to 5.3)   | 138.1 (107.6 to 168.9)    | 6.1 (3.8 to 8.7)                   | 144.2 (112.2 to 176.5)                 | 4.3 (3.1 to 5.8)   | 118.9 (82.4 to 160.9)     | 8.4 (5 to 12.9)                    | 127.2 (88.3 to 172.4)                  |
| North Macedonia          | Alcohol use                 | 1.6 (1.2 to 2.1)   | 52.1 (38.2 to 67.8)       | 2.3 (1.4 to 3.4)                   | 54.4 (39.9 to 70.6)                    | 1.1 (0.7 to 1.6)   | 31.8 (20.2 to 45.8)       | 2.2 (1.3 to 3.6)                   | 34 (21.6 to 49.4)                      |
| North Macedonia          | Diet high in red meat       | 0.6 (0.1 to 0.8)   | 18.5 (4.8 to 25.3)        | 0.8 (0.2 to 1.3)                   | 19.3 (5 to 26.5)                       | 0.6 (0.2 to 1)     | 17.9 (4.3 to 28.3)        | 1.3 (0.3 to 2.2)                   | 19.1 (4.7 to 30.3)                     |
| North Macedonia          | Low physical activity       | 0.2 (0.1 to 0.3)   | 5 (2.9 to 8.8)            | 0.2 (0.1 to 0.5)                   | 5.2 (3.1 to 9.2)                       | 0.3 (0.1 to 0.5)   | 5.9 (3.2 to 10)           | 0.4 (0.2 to 0.8)                   | 6.3 (3.4 to 10.7)                      |
| North Macedonia          | Smoking                     | 1.7 (1.1 to 2.3)   | 52 (33.8 to 73)           | 2.3 (1.3 to 3.5)                   | 54.3 (35.3 to 75.8)                    | 1.8 (1.2 to 2.6)   | 51.2 (33.7 to 74.3)       | 3.6 (2 to 5.9)                     | 54.8 (36.1 to 79.4)                    |
| North Macedonia          | Secondhand smoke            | 0.7 (0.2 to 1.2)   | 21.4 (4.9 to 37)          | 0.9 (0.2 to 1.8)                   | 22.3 (5.2 to 38.7)                     | 0.8 (0.2 to 1.4)   | 20.5 (4.9 to 37.4)        | 1.4 (0.3 to 2.8)                   | 21.9 (5.2 to 40.1)                     |
| North Macedonia          | Metabolic risks             | 2.2 (0.7 to 4.2)   | 42.8 (4.3 to 91.9)        | 2.2 (0.4 to 4.7)                   | 45 (4.7 to 96.3)                       | 4.3 (1.6 to 8.3)   | 82 (23.8 to 172.8)        | 5.7 (1.5 to 11.9)                  | 87.7 (25.7 to 185.1)                   |
| North Macedonia          | High body-mass index        | 0.9 (0.1 to 2)     | 11.9 (-11.3 to 36.6)      | 0.7 (-0.4 to 2)                    | 12.7 (-11.9 to 38.7)                   | 1.7 (0.4 to 3.4)   | 25.7 (-3.3 to 63.4)       | 1.7 (-0.3 to 4.2)                  | 27.4 (-3.6 to 67.2)                    |
| North Macedonia          | High fasting plasma glucose | 1.4 (0.3 to 3.2)   | 32.8 (6.1 to 76.5)        | 1.6 (0.3 to 3.9)                   | 34.4 (6.5 to 80.3)                     | 2.8 (0.6 to 6.5)   | 61.2 (12.4 to 143.4)      | 4.3 (0.9 to 10.7)                  | 65.5 (13.2 to 151.5)                   |
| Northern Mariana Islands | All risk factors            | 11.8 (6.7 to 17.4) | 290.8 (170.6 to 429.3)    | 13.3 (6.9 to 20.7)                 | 304.1 (177.6 to 448.2)                 | 11.6 (6.6 to 16.5) | 278.5 (167.1 to 397.4)    | 16.6 (9.2 to 26)                   | 295.1 (176.4 to 418.8)                 |
| Northern Mariana Islands | Behavioral risks            | 3.6 (2.3 to 5.1)   | 101.4 (63.5 to 144.9)     | 4.6 (2.5 to 7.2)                   | 106 (66.1 to 150.9)                    | 3.2 (2.1 to 4.5)   | 86.3 (55.1 to 125.3)      | 5.2 (2.9 to 8.1)                   | 91.5 (58 to 132.6)                     |
| Northern Mariana Islands | Alcohol use                 | 0.2 (0 to 0.4)     | 5.8 (0 to 14.1)           | 0.3 (0 to 0.7)                     | 6.1 (0 to 14.7)                        | 0.2 (0 to 0.5)     | 7 (0 to 17)               | 0.4 (0 to 1.1)                     | 7.5 (0 to 18.1)                        |
| Northern Mariana Islands | Diet high in red meat       | 1 (0.4 to 1.6)     | 30.1 (10.7 to 47.5)       | 1.4 (0.5 to 2.3)                   | 31.5 (11.1 to 49.8)                    | 0.9 (0.3 to 1.3)   | 24.9 (8.5 to 38.4)        | 1.5 (0.5 to 2.5)                   | 26.4 (9 to 40.6)                       |
| Northern Mariana Islands | Low physical activity       | 0.5 (0.2 to 1)     | 12.2 (4.5 to 24.1)        | 0.6 (0.2 to 1.2)                   | 12.8 (4.7 to 25.3)                     | 0.6 (0.2 to 1)     | 12.3 (4.5 to 23.2)        | 0.7 (0.3 to 1.5)                   | 13.1 (4.8 to 24.7)                     |
| Northern Mariana Islands | Smoking                     | 1 (0.5 to 1.5)     | 26.2 (13.4 to 41.7)       | 1.2 (0.5 to 2.1)                   | 27.4 (14.1 to 43.5)                    | 0.8 (0.4 to 1.3)   | 20.5 (10.3 to 33.7)       | 1.2 (0.6 to 2.2)                   | 21.8 (10.9 to 35.9)                    |
| Northern Mariana Islands | Secondhand smoke            | 1.1 (0.2 to 2.1)   | 32.3 (7.3 to 59.5)        | 1.5 (0.3 to 2.8)                   | 33.8 (7.6 to 62.5)                     | 0.9 (0.2 to 1.6)   | 25.7 (6.5 to 47.2)        | 1.5 (0.4 to 3)                     | 27.3 (6.9 to 50.1)                     |
| Northern Mariana Islands | Metabolic risks             | 9.3 (4 to 15.1)    | 218.1 (93.9 to 355.4)     | 9.9 (4.2 to 16.8)                  | 228 (98 to 372.4)                      | 9.5 (4.4 to 14.7)  | 218.7 (103.2 to 340)      | 13 (5.8 to 21.9)                   | 231.7 (109.6 to 358.2)                 |
| Northern Mariana Islands | High body-mass index        | 7.8 (2.8 to 13.7)  | 180.7 (66.8 to 312.5)     | 8.2 (2.9 to 14.9)                  | 189 (71.3 to 326.9)                    | 7.2 (2.7 to 12.5)  | 165 (62.2 to 285.4)       | 9.7 (3.4 to 17.5)                  | 174.7 (66.6 to 302.7)                  |

| Location                 | Risk factor                 | 1990               |                           |                                    |                                        | 2019              |                           |                                    |                                        |
|--------------------------|-----------------------------|--------------------|---------------------------|------------------------------------|----------------------------------------|-------------------|---------------------------|------------------------------------|----------------------------------------|
|                          |                             | Deaths             | YLLs (Years of Life Lost) | YLDs (Years Lived with Disability) | DALYs (Disability-Adjusted Life Years) | Deaths            | YLLs (Years of Life Lost) | YLDs (Years Lived with Disability) | DALYs (Disability-Adjusted Life Years) |
| Northern Mariana Islands | High fasting plasma glucose | 2.3 (0.4 to 5.2)   | 52.3 (9.9 to 123.6)       | 2.4 (0.4 to 5.8)                   | 54.7 (10.4 to 128.6)                   | 3.3 (0.6 to 7.3)  | 74.6 (13.8 to 171.4)      | 4.5 (0.8 to 10.6)                  | 79.1 (14.5 to 180.7)                   |
| Norway                   | All risk factors            | 7.4 (5.8 to 9)     | 193.6 (155.9 to 231.1)    | 14.4 (9.4 to 20.3)                 | 207.9 (167.3 to 247.4)                 | 4.8 (3.6 to 6.2)  | 111.1 (85.1 to 140.7)     | 15.9 (9.7 to 24.1)                 | 127.1 (96.7 to 160.9)                  |
| Norway                   | Behavioral risks            | 5.8 (4.8 to 6.6)   | 164.3 (138.7 to 188.4)    | 11.9 (7.9 to 17.1)                 | 176.2 (148.3 to 202.9)                 | 3.3 (2.7 to 3.9)  | 85.7 (71.1 to 100.8)      | 12.2 (7.7 to 18.4)                 | 97.9 (80.6 to 116.5)                   |
| Norway                   | Alcohol use                 | 2.4 (1.9 to 3)     | 71 (55.7 to 86.5)         | 5.1 (3.3 to 7.5)                   | 76.2 (59.5 to 93.2)                    | 1.7 (1.3 to 2.1)  | 44.1 (34.3 to 55)         | 6.2 (3.8 to 9.5)                   | 50.3 (38.9 to 63.1)                    |
| Norway                   | Diet high in red meat       | 1.1 (0.5 to 1.4)   | 29.6 (13.7 to 39)         | 2.2 (0.9 to 3.4)                   | 31.7 (14.8 to 42.1)                    | 0.7 (0.4 to 1)    | 18.6 (9 to 25.7)          | 2.6 (1.2 to 4.5)                   | 21.2 (10.3 to 29.4)                    |
| Norway                   | Low physical activity       | 0.4 (0.1 to 0.7)   | 8.4 (2.8 to 16.9)         | 0.7 (0.2 to 1.5)                   | 9.1 (3 to 18.2)                        | 0.3 (0.1 to 0.5)  | 5.5 (1.8 to 10.7)         | 0.8 (0.2 to 1.8)                   | 6.3 (2 to 12.3)                        |
| Norway                   | Smoking                     | 2 (1.4 to 2.7)     | 57.9 (40.1 to 77.3)       | 4.2 (2.4 to 6.4)                   | 62 (42.6 to 82.6)                      | 0.8 (0.6 to 1)    | 20.1 (14.4 to 26.8)       | 2.9 (1.7 to 4.7)                   | 23 (16.2 to 30.6)                      |
| Norway                   | Secondhand smoke            | 0.5 (0.1 to 0.8)   | 14.9 (3.6 to 25.6)        | 1.1 (0.2 to 2)                     | 16 (3.9 to 27.8)                       | 0.2 (0 to 0.3)    | 5.4 (1.3 to 9.4)          | 0.7 (0.2 to 1.5)                   | 6.1 (1.4 to 10.7)                      |
| Norway                   | Metabolic risks             | 2.1 (0.7 to 4)     | 39 (9.4 to 79.3)          | 3.2 (0.8 to 6.8)                   | 42.2 (10.4 to 86.4)                    | 1.9 (0.7 to 3.5)  | 32.9 (9.7 to 67)          | 4.9 (1.4 to 10.1)                  | 37.8 (11.2 to 75.5)                    |
| Norway                   | High body-mass index        | 0.8 (0.2 to 1.7)   | 11.6 (-3.1 to 30.8)       | 1 (-0.1 to 2.4)                    | 12.5 (-3.3 to 32.9)                    | 0.7 (0.2 to 1.4)  | 10.1 (-0.8 to 24.2)       | 1.5 (0 to 3.7)                     | 11.6 (-0.7 to 27.6)                    |
| Norway                   | High fasting plasma glucose | 1.3 (0.3 to 3)     | 28.5 (5.3 to 65.2)        | 2.3 (0.4 to 5.7)                   | 30.9 (5.7 to 70.7)                     | 1.2 (0.2 to 2.7)  | 24.1 (4.6 to 53.6)        | 3.5 (0.6 to 8.4)                   | 27.6 (5.3 to 61.7)                     |
| Oman                     | All risk factors            | 1.7 (0.9 to 3.1)   | 43 (20.4 to 78.1)         | 1.9 (0.9 to 3.5)                   | 44.9 (21.4 to 81.5)                    | 3.9 (2.1 to 6.3)  | 84.5 (44.2 to 136.8)      | 6.1 (3 to 10.6)                    | 90.6 (47.3 to 146.5)                   |
| Oman                     | Behavioral risks            | 0.8 (0.5 to 1.3)   | 22.7 (12.6 to 36.9)       | 1 (0.5 to 1.6)                     | 23.7 (13.2 to 38.3)                    | 1.3 (0.8 to 1.8)  | 33.1 (20.5 to 45.4)       | 2.4 (1.4 to 3.8)                   | 35.6 (21.8 to 49)                      |
| Oman                     | Alcohol use                 | 0 (0 to 0)         | 0.8 (0.3 to 1.3)          | 0 (0 to 0.1)                       | 0.8 (0.4 to 1.4)                       | 0 (0 to 0.1)      | 1.3 (0.7 to 2)            | 0.1 (0 to 0.2)                     | 1.4 (0.8 to 2.1)                       |
| Oman                     | Diet high in red meat       | 0.3 (0.1 to 0.5)   | 8.7 (2.2 to 15.2)         | 0.4 (0.1 to 0.7)                   | 9.1 (2.3 to 15.8)                      | 0.5 (0.2 to 0.7)  | 13.7 (4.7 to 19.9)        | 1 (0.3 to 1.6)                     | 14.8 (5 to 21.4)                       |
| Oman                     | Low physical activity       | 0.2 (0.1 to 0.4)   | 4.9 (1.7 to 9.7)          | 0.2 (0.1 to 0.5)                   | 5.2 (1.8 to 10.2)                      | 0.4 (0.2 to 0.7)  | 9 (3.3 to 15.9)           | 0.7 (0.2 to 1.3)                   | 9.6 (3.6 to 17.3)                      |
| Oman                     | Smoking                     | 0.1 (0 to 0.1)     | 2.2 (1.2 to 3.7)          | 0.1 (0 to 0.2)                     | 2.3 (1.2 to 3.9)                       | 0.1 (0.1 to 0.1)  | 2.1 (1.3 to 3.2)          | 0.2 (0.1 to 0.3)                   | 2.2 (1.3 to 3.4)                       |
| Oman                     | Secondhand smoke            | 0.2 (0.1 to 0.4)   | 6.7 (1.5 to 13.4)         | 0.3 (0.1 to 0.6)                   | 7 (1.6 to 13.9)                        | 0.3 (0.1 to 0.5)  | 8 (1.8 to 14.8)           | 0.6 (0.1 to 1.1)                   | 8.6 (1.9 to 16.1)                      |
| Oman                     | Metabolic risks             | 1 (0.3 to 2.2)     | 22 (4 to 51.2)            | 1 (0.2 to 2.3)                     | 22.9 (4.1 to 52.9)                     | 2.8 (1.1 to 5.2)  | 56.2 (16 to 109.9)        | 4 (1.2 to 8.2)                     | 60.2 (17.2 to 116.9)                   |
| Oman                     | High body-mass index        | 0.3 (0 to 0.8)     | 5.3 (-3.3 to 16.7)        | 0.2 (-0.1 to 0.7)                  | 5.5 (-3.3 to 17.4)                     | 1.3 (0.3 to 2.6)  | 22.1 (-1.2 to 51.1)       | 1.5 (-0.2 to 3.4)                  | 23.6 (-1.2 to 54.4)                    |
| Oman                     | High fasting plasma glucose | 0.7 (0.1 to 1.8)   | 17.4 (2.9 to 44.4)        | 0.8 (0.1 to 2)                     | 18.2 (3 to 46.3)                       | 1.7 (0.3 to 3.9)  | 37.9 (7.4 to 86.3)        | 2.8 (0.5 to 6.8)                   | 40.8 (8 to 93.3)                       |
| Pakistan                 | All risk factors            | 4.4 (2.2 to 8)     | 116.6 (60.6 to 208.2)     | 2.8 (1.4 to 5.2)                   | 119.5 (62.1 to 213.8)                  | 8.6 (4.4 to 15.2) | 211.3 (103.6 to 385.4)    | 6.3 (3 to 11.5)                    | 217.7 (106.7 to 393.1)                 |
| Pakistan                 | Behavioral risks            | 2.6 (1.4 to 4.3)   | 76.4 (41.8 to 122.2)      | 1.8 (0.9 to 3.1)                   | 78.2 (42.8 to 124.9)                   | 3.7 (2.2 to 5.5)  | 104.6 (58.7 to 159.3)     | 3 (1.6 to 4.9)                     | 107.6 (61.1 to 163.6)                  |
| Pakistan                 | Alcohol use                 | 0.1 (0 to 0.1)     | 1.7 (1 to 2.8)            | 0 (0 to 0.1)                       | 1.8 (1 to 2.8)                         | 0.1 (0.1 to 0.2)  | 3.9 (2.3 to 6.1)          | 0.1 (0.1 to 0.2)                   | 4 (2.4 to 6.2)                         |
| Pakistan                 | Diet high in red meat       | 0.6 (0.1 to 1)     | 17.7 (3.5 to 29.4)        | 0.4 (0.1 to 0.7)                   | 18.1 (3.7 to 30.1)                     | 1 (0.2 to 1.5)    | 29.2 (6.5 to 47.9)        | 0.8 (0.2 to 1.4)                   | 30.1 (6.7 to 49.2)                     |
| Pakistan                 | Low physical activity       | 0.4 (0.2 to 0.7)   | 8.4 (4 to 15.3)           | 0.2 (0.1 to 0.4)                   | 8.6 (4.1 to 15.7)                      | 0.6 (0.3 to 1)    | 13.1 (6.6 to 22.8)        | 0.4 (0.2 to 0.7)                   | 13.5 (6.9 to 23.3)                     |
| Pakistan                 | Smoking                     | 0.6 (0.3 to 1)     | 15 (7.6 to 25.9)          | 0.4 (0.2 to 0.7)                   | 15.4 (7.8 to 26.5)                     | 0.6 (0.3 to 1)    | 15.8 (8.2 to 26.2)        | 0.5 (0.2 to 0.8)                   | 16.3 (8.5 to 26.8)                     |
| Pakistan                 | Secondhand smoke            | 1.2 (0.3 to 2.2)   | 35.7 (8.3 to 67.9)        | 0.8 (0.2 to 1.6)                   | 36.5 (8.5 to 69.4)                     | 1.5 (0.3 to 2.7)  | 45.3 (10.6 to 82.5)       | 1.3 (0.3 to 2.5)                   | 46.5 (10.9 to 84.6)                    |
| Pakistan                 | Metabolic risks             | 1.9 (0.4 to 4.6)   | 43.9 (6.5 to 109.9)       | 1.1 (0.2 to 2.8)                   | 45 (6.7 to 112.6)                      | 5.3 (1.6 to 11.7) | 115.3 (22.1 to 274.8)     | 3.6 (0.8 to 8.4)                   | 118.8 (23 to 281.7)                    |
| Pakistan                 | High body-mass index        | 0.4 (0 to 1.2)     | 4.5 (-6 to 19)            | 0.2 (-0.1 to 0.6)                  | 4.7 (-6.1 to 19.6)                     | 1.2 (0 to 3)      | 14.1 (-19 to 49.1)        | 0.6 (-0.4 to 1.7)                  | 14.6 (-19.3 to 50.8)                   |
| Pakistan                 | High fasting plasma glucose | 1.6 (0.3 to 4.2)   | 39.9 (6.4 to 105.2)       | 1 (0.2 to 2.7)                     | 40.9 (6.7 to 107.8)                    | 4.2 (0.9 to 10.3) | 104.4 (20.3 to 258.9)     | 3.1 (0.6 to 8)                     | 107.5 (21 to 265.3)                    |
| Palau                    | All risk factors            | 11.2 (6.2 to 16.9) | 283 (159.2 to 419.2)      | 11.3 (6 to 18)                     | 294.4 (166.8 to 436.1)                 | 14.2 (8.3 to 21)  | 352 (208 to 523.1)        | 18.5 (10.2 to 29.7)                | 370.5 (220.6 to 550)                   |
| Palau                    | Behavioral risks            | 3.5 (2.2 to 5.2)   | 100.7 (59.5 to 152.3)     | 4 (2.1 to 6.6)                     | 104.7 (61.9 to 157.6)                  | 3.8 (2.4 to 5.6)  | 106.6 (65.1 to 157.6)     | 5.6 (3.1 to 9)                     | 112.2 (68.8 to 167.6)                  |
| Palau                    | Alcohol use                 | 0.3 (0 to 0.5)     | 8.9 (1.1 to 18.6)         | 0.4 (0 to 0.8)                     | 9.3 (1.2 to 19.2)                      | 0.4 (0.1 to 0.7)  | 12.4 (3.2 to 25)          | 0.7 (0.2 to 1.4)                   | 13.1 (3.3 to 26.7)                     |
| Palau                    | Diet high in red meat       | 0.9 (0.2 to 1.4)   | 26.6 (7.4 to 43.3)        | 1.1 (0.3 to 1.9)                   | 27.7 (7.8 to 45.2)                     | 1 (0.3 to 1.6)    | 28.4 (9.1 to 45.9)        | 1.5 (0.5 to 2.6)                   | 29.9 (9.6 to 48)                       |
| Palau                    | Low physical activity       | 0.5 (0.2 to 1)     | 11.6 (4.3 to 23)          | 0.5 (0.2 to 1)                     | 12 (4.5 to 24)                         | 0.7 (0.2 to 1.2)  | 14.7 (5.2 to 29.2)        | 0.8 (0.3 to 1.7)                   | 15.5 (5.5 to 30.8)                     |
| Palau                    | Smoking                     | 0.8 (0.4 to 1.2)   | 21.1 (11 to 35.3)         | 0.8 (0.4 to 1.6)                   | 21.9 (11.4 to 36.8)                    | 0.7 (0.4 to 1.1)  | 18.3 (9.1 to 30)          | 1 (0.5 to 1.7)                     | 19.3 (9.6 to 31.3)                     |
| Palau                    | Secondhand smoke            | 1.3 (0.3 to 2.3)   | 37.2 (7.6 to 68.9)        | 1.5 (0.3 to 2.9)                   | 38.7 (7.8 to 71.9)                     | 1.3 (0.3 to 2.3)  | 37.7 (9.1 to 69.3)        | 2 (0.4 to 3.9)                     | 39.6 (9.7 to 73)                       |

| Location         | Risk factor                 | 1990              |                           |                                    |                                        | 2019               |                           |                                    |                                        |
|------------------|-----------------------------|-------------------|---------------------------|------------------------------------|----------------------------------------|--------------------|---------------------------|------------------------------------|----------------------------------------|
|                  |                             | Deaths            | YLLs (Years of Life Lost) | YLDs (Years Lived with Disability) | DALYs (Disability-Adjusted Life Years) | Deaths             | YLLs (Years of Life Lost) | YLDs (Years Lived with Disability) | DALYs (Disability-Adjusted Life Years) |
| Palau            | Metabolic risks             | 8.6 (3.7 to 14.4) | 207.1 (89 to 338.5)       | 8.3 (3.4 to 14.3)                  | 215.4 (92.7 to 352)                    | 11.7 (5.4 to 18.7) | 277.8 (128.7 to 444.2)    | 14.5 (6.5 to 25)                   | 292.3 (136.4 to 467.9)                 |
| Palau            | High body-mass index        | 6.6 (2.3 to 11.7) | 158 (54.8 to 277.8)       | 6.3 (2.1 to 11.6)                  | 164.3 (57.3 to 286.6)                  | 8.2 (3 to 14.7)    | 190.7 (70.3 to 337.5)     | 9.9 (3.5 to 19.1)                  | 200.6 (74.9 to 358.1)                  |
| Palau            | High fasting plasma glucose | 2.7 (0.5 to 6.2)  | 64.1 (12 to 149.7)        | 2.6 (0.5 to 6.4)                   | 66.7 (12.4 to 155.1)                   | 4.9 (1 to 10.7)    | 117.1 (23.5 to 265)       | 6.2 (1.2 to 14.6)                  | 123.3 (24.7 to 278.4)                  |
| Palestine        | All risk factors            | 3.2 (1.6 to 5.6)  | 79.3 (38.3 to 140)        | 3 (1.4 to 5.5)                     | 82.3 (40 to 145)                       | 5.8 (3.1 to 9.4)   | 133.8 (69.7 to 216.4)     | 6.8 (3.3 to 11.8)                  | 140.6 (73.4 to 227.7)                  |
| Palestine        | Behavioral risks            | 1.7 (0.9 to 2.7)  | 49.1 (26.9 to 79.1)       | 1.8 (0.9 to 3.1)                   | 50.9 (28 to 81.9)                      | 2.2 (1.4 to 3.1)   | 60.8 (36 to 88.1)         | 3.1 (1.7 to 5)                     | 63.9 (37.7 to 92.9)                    |
| Palestine        | Alcohol use                 | 0.1 (0.1 to 0.2)  | 3.1 (1.7 to 5.3)          | 0.1 (0.1 to 0.2)                   | 3.2 (1.8 to 5.5)                       | 0.2 (0.1 to 0.3)   | 5.6 (3.8 to 8.1)          | 0.3 (0.2 to 0.4)                   | 5.9 (4 to 8.6)                         |
| Palestine        | Diet high in red meat       | 0.3 (0.1 to 0.5)  | 8.6 (1.6 to 14.9)         | 0.3 (0.1 to 0.6)                   | 8.9 (1.6 to 15.4)                      | 0.3 (0.1 to 0.5)   | 9.2 (1.8 to 13.9)         | 0.5 (0.1 to 0.8)                   | 9.6 (1.9 to 14.6)                      |
| Palestine        | Low physical activity       | 0.4 (0.1 to 0.7)  | 8.9 (3.3 to 17.6)         | 0.4 (0.1 to 0.7)                   | 9.3 (3.4 to 18.3)                      | 0.6 (0.2 to 1)     | 13 (5 to 23)              | 0.7 (0.2 to 1.3)                   | 13.6 (5.3 to 24.1)                     |
| Palestine        | Smoking                     | 0.2 (0.1 to 0.3)  | 5.1 (2.6 to 8.7)          | 0.2 (0.1 to 0.3)                   | 5.3 (2.7 to 9)                         | 0.2 (0.2 to 0.4)   | 5.9 (3.6 to 8.7)          | 0.3 (0.2 to 0.5)                   | 6.2 (3.8 to 9.2)                       |
| Palestine        | Secondhand smoke            | 0.8 (0.2 to 1.4)  | 24.9 (5.8 to 47.5)        | 0.9 (0.2 to 1.8)                   | 25.8 (6 to 49.2)                       | 1 (0.2 to 1.7)     | 29 (6.7 to 51.6)          | 1.5 (0.3 to 2.8)                   | 30.5 (7.1 to 53.9)                     |
| Palestine        | Metabolic risks             | 1.7 (0.4 to 3.7)  | 33.2 (-0.2 to 84.1)       | 1.3 (0 to 3.2)                     | 34.5 (-0.2 to 87.6)                    | 3.9 (1.4 to 7.7)   | 80.2 (19.1 to 164)        | 4.1 (0.9 to 8.7)                   | 84.2 (19.8 to 172.3)                   |
| Palestine        | High body-mass index        | 0.6 (-0.1 to 1.4) | 4.7 (-15.1 to 25.3)       | 0.2 (-0.5 to 1)                    | 4.9 (-15.6 to 26.3)                    | 1.3 (0.2 to 2.6)   | 19 (-9.3 to 50.4)         | 0.9 (-0.5 to 2.5)                  | 19.9 (-9.9 to 53.2)                    |
| Palestine        | High fasting plasma glucose | 1.2 (0.2 to 3.1)  | 30 (5.1 to 76.9)          | 1.2 (0.2 to 3)                     | 31.1 (5.3 to 79.5)                     | 2.9 (0.6 to 6.5)   | 65.8 (13.4 to 150.3)      | 3.4 (0.7 to 8.3)                   | 69.2 (14.2 to 158)                     |
| Panama           | All risk factors            | 2.4 (1.6 to 3.4)  | 62.9 (41.9 to 86.6)       | 2.9 (1.8 to 4.6)                   | 65.9 (43.9 to 91.1)                    | 3.1 (1.8 to 5.1)   | 75.4 (43.4 to 122.9)      | 5.4 (2.9 to 9.4)                   | 80.8 (46.7 to 131.9)                   |
| Panama           | Behavioral risks            | 1.5 (1.1 to 1.8)  | 44.2 (33.2 to 53.9)       | 2 (1.3 to 2.7)                     | 46.2 (34.8 to 56.3)                    | 1.5 (1 to 2)       | 43.2 (29.3 to 59.2)       | 2.9 (1.7 to 4.5)                   | 46.1 (31.3 to 63.1)                    |
| Panama           | Alcohol use                 | 0.5 (0.4 to 0.7)  | 18 (13.5 to 23.1)         | 0.8 (0.5 to 1.1)                   | 18.8 (14 to 24.2)                      | 0.6 (0.4 to 0.9)   | 20.8 (13.8 to 29.6)       | 1.4 (0.8 to 2.2)                   | 22.1 (15 to 31.7)                      |
| Panama           | Diet high in red meat       | 0.4 (0.2 to 0.6)  | 13.4 (5 to 17.8)          | 0.6 (0.2 to 0.9)                   | 14 (5.3 to 18.6)                       | 0.5 (0.2 to 0.7)   | 13.8 (4.9 to 21.4)        | 0.9 (0.3 to 1.6)                   | 14.8 (5.2 to 22.9)                     |
| Panama           | Low physical activity       | 0.1 (0 to 0.1)    | 1.6 (1 to 3.6)            | 0.1 (0 to 0.2)                     | 1.7 (1 to 3.8)                         | 0.1 (0 to 0.2)     | 1.8 (1 to 3.8)            | 0.1 (0.1 to 0.3)                   | 1.9 (1 to 4.1)                         |
| Panama           | Smoking                     | 0.3 (0.2 to 0.4)  | 6.6 (4.2 to 9.6)          | 0.3 (0.2 to 0.5)                   | 6.9 (4.4 to 10.1)                      | 0.2 (0.1 to 0.3)   | 4.3 (2.5 to 6.8)          | 0.3 (0.2 to 0.5)                   | 4.6 (2.7 to 7.3)                       |
| Panama           | Secondhand smoke            | 0.2 (0 to 0.4)    | 6.6 (1.5 to 11.4)         | 0.3 (0.1 to 0.5)                   | 6.9 (1.6 to 12)                        | 0.1 (0 to 0.3)     | 4.3 (1.1 to 8.1)          | 0.3 (0.1 to 0.6)                   | 4.6 (1.1 to 8.6)                       |
| Panama           | Metabolic risks             | 1.1 (0.3 to 2.2)  | 21 (3 to 46.8)            | 1.1 (0.2 to 2.5)                   | 22.1 (3.3 to 49.1)                     | 1.8 (0.6 to 3.7)   | 35.9 (6.5 to 80.7)        | 2.8 (0.6 to 6.1)                   | 38.7 (7 to 87)                         |
| Panama           | High body-mass index        | 0.3 (0 to 0.7)    | 2.8 (-5.3 to 11.2)        | 0.2 (-0.1 to 0.6)                  | 3 (-5.5 to 11.9)                       | 0.6 (0.1 to 1.3)   | 7.2 (-6.8 to 22.4)        | 0.7 (-0.2 to 1.8)                  | 7.8 (-7.1 to 24.3)                     |
| Panama           | High fasting plasma glucose | 0.8 (0.2 to 1.9)  | 18.8 (3.4 to 41.9)        | 0.9 (0.2 to 2.2)                   | 19.7 (3.6 to 44.2)                     | 1.3 (0.3 to 3.1)   | 30.5 (5.9 to 72.5)        | 2.3 (0.4 to 5.6)                   | 32.8 (6.5 to 76.8)                     |
| Papua New Guinea | All risk factors            | 9.2 (5.3 to 14)   | 285.3 (165.8 to 432.3)    | 6.8 (3.7 to 11.1)                  | 292.1 (170.2 to 442.1)                 | 12.5 (6.9 to 20.1) | 380.6 (212 to 618.1)      | 10.2 (5.4 to 16.9)                 | 390.8 (216.8 to 633.2)                 |
| Papua New Guinea | Behavioral risks            | 4.5 (2.7 to 6.4)  | 147.8 (85.9 to 214.2)     | 3.5 (1.9 to 5.4)                   | 151.3 (87.8 to 219)                    | 4.9 (3 to 7.3)     | 158.8 (93.9 to 238.8)     | 4.2 (2.3 to 6.7)                   | 163 (96.1 to 244.7)                    |
| Papua New Guinea | Alcohol use                 | 0.4 (0.2 to 0.7)  | 14.6 (6.1 to 25.4)        | 0.3 (0.1 to 0.6)                   | 14.9 (6.2 to 26)                       | 0.4 (0.1 to 0.7)   | 14.5 (4.9 to 27.3)        | 0.4 (0.1 to 0.7)                   | 14.9 (5 to 28.1)                       |
| Papua New Guinea | Diet high in red meat       | 0.9 (0.2 to 1.4)  | 29.9 (7.4 to 48.1)        | 0.7 (0.2 to 1.2)                   | 30.6 (7.6 to 49)                       | 1 (0.2 to 1.6)     | 32.7 (7.2 to 52.8)        | 0.9 (0.2 to 1.5)                   | 33.5 (7.4 to 54)                       |
| Papua New Guinea | Low physical activity       | 0.4 (0.2 to 0.8)  | 12.3 (4.9 to 24.7)        | 0.3 (0.1 to 0.7)                   | 12.6 (5 to 25.3)                       | 0.5 (0.2 to 1.1)   | 15.3 (6 to 31.8)          | 0.4 (0.2 to 1)                     | 15.7 (6.2 to 32.7)                     |
| Papua New Guinea | Smoking                     | 1.4 (0.7 to 2.3)  | 42.2 (19.8 to 70)         | 1 (0.4 to 1.8)                     | 43.2 (20.3 to 71.5)                    | 1.4 (0.7 to 2.3)   | 41.2 (20.1 to 67.7)       | 1.1 (0.5 to 2)                     | 42.4 (20.6 to 69.7)                    |
| Papua New Guinea | Secondhand smoke            | 1.6 (0.4 to 2.9)  | 56 (12.6 to 100.7)        | 1.3 (0.3 to 2.5)                   | 57.3 (13 to 103.2)                     | 1.8 (0.5 to 3.4)   | 62 (15.7 to 115.1)        | 1.6 (0.4 to 3.1)                   | 63.6 (16.1 to 118.2)                   |
| Papua New Guinea | Metabolic risks             | 5.4 (1.9 to 10.3) | 157.8 (56 to 299.5)       | 3.8 (1.3 to 7.4)                   | 161.6 (57.2 to 307.4)                  | 8.6 (3.2 to 16.1)  | 251.2 (93.9 to 473.3)     | 6.8 (2.5 to 13.2)                  | 258 (97.3 to 490.7)                    |
| Papua New Guinea | High body-mass index        | 3.5 (0.9 to 7.6)  | 102.2 (27.6 to 217.3)     | 2.5 (0.6 to 5.3)                   | 104.6 (28.3 to 222.2)                  | 4.9 (1.2 to 10.5)  | 142.4 (36.9 to 303.9)     | 3.8 (1 to 8)                       | 146.3 (37.9 to 310.4)                  |
| Papua New Guinea | High fasting plasma glucose | 2.1 (0.4 to 5)    | 62.3 (11.3 to 152.4)      | 1.5 (0.3 to 3.7)                   | 63.8 (11.6 to 156.1)                   | 4.2 (0.8 to 9.8)   | 124.2 (22.9 to 299)       | 3.4 (0.6 to 8.6)                   | 127.6 (23.6 to 307)                    |
| Paraguay         | All risk factors            | 3.4 (2.5 to 4.4)  | 89.8 (65.6 to 117.2)      | 3.2 (2 to 4.7)                     | 93 (68.1 to 121.2)                     | 4.7 (3.1 to 7.1)   | 115.3 (73.5 to 174.5)     | 6.2 (3.6 to 9.6)                   | 121.5 (77.9 to 184.9)                  |
| Paraguay         | Behavioral risks            | 2.6 (2 to 3.2)    | 75.6 (59.2 to 93.4)       | 2.6 (1.7 to 3.7)                   | 78.2 (61.1 to 96.5)                    | 3 (2.1 to 4.1)     | 83.9 (56.6 to 116.3)      | 4.3 (2.5 to 6.6)                   | 88.2 (59.6 to 122)                     |
| Paraguay         | Alcohol use                 | 1 (0.7 to 1.2)    | 31.4 (23.5 to 40.2)       | 1.1 (0.7 to 1.5)                   | 32.5 (24.3 to 41.3)                    | 1 (0.7 to 1.5)     | 32.6 (20.9 to 47)         | 1.6 (0.9 to 2.6)                   | 34.3 (21.9 to 49.2)                    |
| Paraguay         | Diet high in red meat       | 0.8 (0.4 to 1.1)  | 22.6 (10.9 to 32.2)       | 0.8 (0.4 to 1.2)                   | 23.4 (11.4 to 33.4)                    | 1 (0.4 to 1.5)     | 27.5 (12.4 to 42.1)       | 1.4 (0.6 to 2.4)                   | 28.9 (12.9 to 44.6)                    |
| Paraguay         | Low physical activity       | 0.1 (0 to 0.1)    | 1.7 (1 to 3.6)            | 0.1 (0 to 0.1)                     | 1.8 (1 to 3.8)                         | 0.1 (0.1 to 0.3)   | 2.7 (1.4 to 5.6)          | 0.1 (0.1 to 0.3)                   | 2.9 (1.5 to 5.9)                       |
| Paraguay         | Smoking                     | 0.7 (0.4 to 0.9)  | 16 (9.9 to 23.2)          | 0.6 (0.3 to 1)                     | 16.6 (10.3 to 24)                      | 0.7 (0.5 to 1.1)   | 15.7 (9.3 to 24.6)        | 0.9 (0.5 to 1.4)                   | 16.5 (9.8 to 26)                       |
| Paraguay         | Secondhand smoke            | 0.3 (0.1 to 0.6)  | 10 (2.4 to 17.3)          | 0.3 (0.1 to 0.6)                   | 10.3 (2.5 to 17.9)                     | 0.4 (0.1 to 0.7)   | 10.9 (2.7 to 20.7)        | 0.6 (0.1 to 1.1)                   | 11.5 (2.8 to 21.8)                     |

| Location    | Risk factor                 | 1990             |                           |                                    |                                        | 2019              |                           |                                    |                                        |
|-------------|-----------------------------|------------------|---------------------------|------------------------------------|----------------------------------------|-------------------|---------------------------|------------------------------------|----------------------------------------|
|             |                             | Deaths           | YLLs (Years of Life Lost) | YLDs (Years Lived with Disability) | DALYs (Disability-Adjusted Life Years) | Deaths            | YLLs (Years of Life Lost) | YLDs (Years Lived with Disability) | DALYs (Disability-Adjusted Life Years) |
| Paraguay    | Metabolic risks             | 1 (0.3 to 2)     | 17.9 (0.7 to 40.8)        | 0.8 (0.1 to 1.7)                   | 18.7 (0.9 to 42.4)                     | 2 (0.7 to 4.2)    | 38 (6.1 to 89.1)          | 2.2 (0.5 to 4.9)                   | 40.2 (6.6 to 94.2)                     |
| Paraguay    | High body-mass index        | 0.4 (0 to 0.9)   | 3.3 (-6.9 to 14)          | 0.2 (-0.2 to 0.6)                  | 3.5 (-7.1 to 14.7)                     | 0.7 (0.1 to 1.8)  | 8.8 (-7.9 to 29.3)        | 0.6 (-0.3 to 1.8)                  | 9.4 (-8.2 to 30.9)                     |
| Paraguay    | High fasting plasma glucose | 0.7 (0.1 to 1.5) | 15.2 (2.9 to 35.5)        | 0.6 (0.1 to 1.4)                   | 15.8 (3 to 37.2)                       | 1.4 (0.3 to 3.2)  | 31.1 (6 to 74.6)          | 1.7 (0.3 to 4.4)                   | 32.8 (6.3 to 78.7)                     |
| Peru        | All risk factors            | 1.9 (1.3 to 2.7) | 52.5 (33.9 to 72.3)       | 1.6 (0.9 to 2.4)                   | 54.1 (35 to 74.3)                      | 2 (1.2 to 3.2)    | 50 (29.9 to 80)           | 2.8 (1.5 to 4.7)                   | 52.7 (31.5 to 84.1)                    |
| Peru        | Behavioral risks            | 1.2 (0.9 to 1.6) | 40 (28.4 to 52.4)         | 1.1 (0.7 to 1.7)                   | 41.2 (29.2 to 53.8)                    | 1.1 (0.7 to 1.5)  | 32.9 (21.5 to 48.7)       | 1.8 (1 to 2.8)                     | 34.7 (22.5 to 51.2)                    |
| Peru        | Alcohol use                 | 0.7 (0.5 to 1)   | 24.4 (16.1 to 33.7)       | 0.7 (0.4 to 1.1)                   | 25 (16.6 to 34.6)                      | 0.6 (0.4 to 0.9)  | 20.9 (12.6 to 31.7)       | 1.1 (0.6 to 1.8)                   | 22 (13.2 to 33.3)                      |
| Peru        | Diet high in red meat       | 0.2 (0 to 0.3)   | 5.8 (1.1 to 8.5)          | 0.2 (0 to 0.3)                     | 6 (1.1 to 8.7)                         | 0.2 (0 to 0.3)    | 5.4 (1 to 8.9)            | 0.3 (0.1 to 0.5)                   | 5.7 (1 to 9.3)                         |
| Peru        | Low physical activity       | 0.1 (0 to 0.1)   | 1.4 (0.9 to 3.9)          | 0 (0 to 0.1)                       | 1.5 (1 to 4)                           | 0.1 (0 to 0.1)    | 1.3 (0.7 to 3.1)          | 0.1 (0 to 0.2)                     | 1.4 (0.8 to 3.3)                       |
| Peru        | Smoking                     | 0.1 (0.1 to 0.2) | 2.9 (1.3 to 4.8)          | 0.1 (0 to 0.2)                     | 3 (1.4 to 4.9)                         | 0.1 (0 to 0.1)    | 2.1 (1 to 3.6)            | 0.1 (0.1 to 0.2)                   | 2.2 (1.1 to 3.8)                       |
| Peru        | Secondhand smoke            | 0.2 (0.1 to 0.4) | 6.8 (1.6 to 12.3)         | 0.2 (0 to 0.4)                     | 7 (1.7 to 12.7)                        | 0.1 (0 to 0.3)    | 4.3 (1 to 8.1)            | 0.2 (0 to 0.5)                     | 4.5 (1.1 to 8.5)                       |
| Peru        | Metabolic risks             | 0.8 (0.2 to 1.5) | 13.6 (-0.7 to 31.6)       | 0.5 (0.1 to 1.1)                   | 14.1 (-0.6 to 32.6)                    | 1.1 (0.3 to 2.2)  | 18.5 (1.6 to 43.3)        | 1.1 (0.2 to 2.4)                   | 19.6 (1.8 to 46)                       |
| Peru        | High body-mass index        | 0.3 (0 to 0.8)   | 4 (-6 to 14.1)            | 0.2 (-0.1 to 0.5)                  | 4.2 (-6.1 to 14.6)                     | 0.5 (0 to 1.2)    | 6.1 (-5.8 to 20.3)        | 0.4 (-0.3 to 1.2)                  | 6.5 (-6.1 to 21.4)                     |
| Peru        | High fasting plasma glucose | 0.4 (0.1 to 1)   | 10 (1.8 to 23.8)          | 0.3 (0.1 to 0.8)                   | 10.3 (1.9 to 24.4)                     | 0.6 (0.1 to 1.5)  | 13.3 (2.4 to 33.5)        | 0.8 (0.1 to 2.1)                   | 14.1 (2.6 to 35)                       |
| Philippines | All risk factors            | 6.1 (4 to 8.5)   | 156.4 (103.9 to 215.6)    | 4.8 (2.8 to 7.1)                   | 161.2 (107.1 to 221.8)                 | 6.9 (4.3 to 10.4) | 189.6 (119.1 to 284)      | 7 (4 to 11)                        | 196.6 (124.4 to 293.4)                 |
| Philippines | Behavioral risks            | 3.3 (2.4 to 4.2) | 92.9 (65.8 to 119.1)      | 2.8 (1.8 to 4.1)                   | 95.7 (67.9 to 122.7)                   | 3.2 (2.2 to 4.4)  | 97.3 (65.9 to 136.7)      | 3.6 (2.1 to 5.5)                   | 100.8 (69 to 139.6)                    |
| Philippines | Alcohol use                 | 1.2 (0.9 to 1.5) | 37.1 (27.4 to 47.6)       | 1.1 (0.7 to 1.6)                   | 38.2 (28.2 to 49.1)                    | 1.3 (0.9 to 1.8)  | 41.6 (27.7 to 58.2)       | 1.5 (0.9 to 2.4)                   | 43.1 (29.2 to 59.7)                    |
| Philippines | Diet high in red meat       | 0.5 (0.1 to 0.6) | 13.5 (3.1 to 18.8)        | 0.4 (0.1 to 0.7)                   | 13.9 (3.2 to 19.4)                     | 0.6 (0.2 to 1)    | 19.4 (6 to 31)            | 0.7 (0.2 to 1.2)                   | 20.1 (6.3 to 31.8)                     |
| Philippines | Low physical activity       | 0.1 (0.1 to 0.2) | 2.8 (1.9 to 6.8)          | 0.1 (0 to 0.2)                     | 2.9 (1.9 to 7.1)                       | 0.1 (0.1 to 0.2)  | 2.7 (1.6 to 6.7)          | 0.1 (0.1 to 0.2)                   | 2.8 (1.7 to 6.9)                       |
| Philippines | Smoking                     | 0.8 (0.5 to 1.1) | 16.8 (9.4 to 25.3)        | 0.5 (0.3 to 0.9)                   | 17.3 (9.7 to 26)                       | 0.6 (0.4 to 0.9)  | 13.4 (7.6 to 21.2)        | 0.5 (0.3 to 0.9)                   | 13.9 (7.9 to 21.9)                     |
| Philippines | Secondhand smoke            | 0.9 (0.2 to 1.6) | 27.5 (6.6 to 47.6)        | 0.8 (0.2 to 1.5)                   | 28.4 (6.8 to 48.9)                     | 0.8 (0.2 to 1.5)  | 25.5 (5.8 to 46.4)        | 0.9 (0.2 to 1.8)                   | 26.4 (6 to 47.6)                       |
| Philippines | Metabolic risks             | 3.2 (1.2 to 5.8) | 73.7 (28.6 to 131.4)      | 2.3 (0.9 to 4.3)                   | 76.1 (29.4 to 135.7)                   | 4.3 (1.8 to 7.7)  | 107.9 (46.3 to 193)       | 4.1 (1.6 to 7.5)                   | 111.9 (47.7 to 200.2)                  |
| Philippines | High body-mass index        | 1.9 (0.5 to 4)   | 47.3 (12 to 99.4)         | 1.5 (0.4 to 3.2)                   | 48.7 (12.4 to 102.4)                   | 3 (1 to 5.7)      | 77.3 (25.8 to 146.2)      | 2.9 (0.8 to 5.9)                   | 80.2 (26.6 to 151.2)                   |
| Philippines | High fasting plasma glucose | 1.4 (0.3 to 3.2) | 29 (5.4 to 65.8)          | 0.9 (0.2 to 2.2)                   | 29.9 (5.6 to 68)                       | 1.5 (0.3 to 3.6)  | 35.9 (6.9 to 86.4)        | 1.4 (0.2 to 3.4)                   | 37.3 (7.3 to 89.1)                     |
| Poland      | All risk factors            | 6.1 (4.6 to 7.7) | 166.1 (128.5 to 205.1)    | 7.3 (4.7 to 10.4)                  | 173.4 (133.6 to 214.1)                 | 6.1 (4.2 to 8.6)  | 150.1 (104.1 to 203.9)    | 11.5 (7 to 17.5)                   | 161.6 (113.6 to 219.5)                 |
| Poland      | Behavioral risks            | 4.2 (3.4 to 5)   | 129.8 (106.7 to 152.2)    | 5.6 (3.7 to 7.8)                   | 135.5 (110.7 to 158.9)                 | 3.8 (2.8 to 5.1)  | 106.4 (77.8 to 141.6)     | 8.3 (5.3 to 12.2)                  | 114.7 (84.6 to 150.7)                  |
| Poland      | Alcohol use                 | 1.2 (0.9 to 1.6) | 42.9 (32.8 to 53.4)       | 1.8 (1.2 to 2.7)                   | 44.8 (34.4 to 55.7)                    | 1.2 (0.8 to 1.6)  | 37.1 (25.1 to 51.8)       | 2.9 (1.8 to 4.5)                   | 40 (27.5 to 54.4)                      |
| Poland      | Diet high in red meat       | 1.1 (0.5 to 1.4) | 30.9 (15.6 to 41)         | 1.3 (0.6 to 2.1)                   | 32.2 (16.2 to 42.8)                    | 1 (0.5 to 1.5)    | 25.7 (12.3 to 39)         | 2 (0.9 to 3.3)                     | 27.7 (13.4 to 41.7)                    |
| Poland      | Low physical activity       | 0.3 (0.1 to 0.4) | 6.1 (3.1 to 10.5)         | 0.3 (0.1 to 0.5)                   | 6.4 (3.3 to 11)                        | 0.3 (0.1 to 0.5)  | 5.5 (2.6 to 9.7)          | 0.4 (0.2 to 0.8)                   | 5.9 (2.9 to 10.4)                      |
| Poland      | Smoking                     | 1.5 (1 to 1.9)   | 45.2 (31.6 to 59.9)       | 2 (1.2 to 3)                       | 47.2 (33 to 62.3)                      | 1.4 (0.9 to 2)    | 37.7 (24.8 to 53.9)       | 2.9 (1.7 to 4.7)                   | 40.6 (27.1 to 57.4)                    |
| Poland      | Secondhand smoke            | 0.6 (0.1 to 1)   | 16.6 (3.9 to 28.8)        | 0.7 (0.2 to 1.3)                   | 17.3 (4.1 to 30.1)                     | 0.4 (0.1 to 0.7)  | 10.1 (2 to 18.8)          | 0.8 (0.2 to 1.5)                   | 10.9 (2.2 to 20.1)                     |
| Poland      | Metabolic risks             | 2.3 (0.9 to 4.2) | 44.6 (10.4 to 87.7)       | 2 (0.5 to 4.1)                     | 46.6 (11 to 91.7)                      | 2.8 (1.1 to 5.1)  | 55.2 (18.6 to 104.6)      | 4 (1.2 to 8.1)                     | 59.2 (20.1 to 110.8)                   |
| Poland      | High body-mass index        | 1.1 (0.2 to 2.2) | 17.2 (-3.7 to 39.8)       | 0.8 (-0.1 to 1.9)                  | 18 (-3.9 to 41.7)                      | 1.5 (0.4 to 2.9)  | 25.5 (2.8 to 55.5)        | 1.8 (0.1 to 4.1)                   | 27.3 (3 to 59.2)                       |
| Poland      | High fasting plasma glucose | 1.3 (0.2 to 2.8) | 29.3 (5.5 to 65.5)        | 1.3 (0.2 to 3.2)                   | 30.7 (5.7 to 68.3)                     | 1.5 (0.3 to 3.5)  | 32.5 (6.2 to 75.7)        | 2.5 (0.4 to 6)                     | 35 (6.6 to 80.6)                       |
| Portugal    | All risk factors            | 6.9 (5.3 to 8.8) | 188.3 (148.5 to 231.8)    | 13.1 (8.3 to 18.8)                 | 201.3 (157.9 to 249.1)                 | 5.1 (3.7 to 7)    | 125.1 (93.1 to 164)       | 16.6 (9.6 to 26)                   | 141.7 (105.8 to 188.2)                 |
| Portugal    | Behavioral risks            | 5.2 (4.3 to 6)   | 156.6 (129.6 to 180.9)    | 10.6 (7 to 15)                     | 167.3 (138.1 to 193.9)                 | 3.3 (2.7 to 4)    | 93.3 (76.1 to 111.8)      | 12.3 (7.5 to 18.7)                 | 105.6 (85.2 to 127.9)                  |
| Portugal    | Alcohol use                 | 2.7 (2.1 to 3.3) | 83.6 (65.8 to 102.1)      | 5.6 (3.7 to 8.1)                   | 89.2 (70.1 to 108.7)                   | 1.5 (1.1 to 1.9)  | 43.2 (33.7 to 54.2)       | 5.7 (3.4 to 8.8)                   | 48.8 (37.7 to 61.7)                    |
| Portugal    | Diet high in red meat       | 1.1 (0.5 to 1.4) | 31.8 (14 to 41.9)         | 2.2 (0.9 to 3.4)                   | 34 (14.8 to 44.8)                      | 0.9 (0.5 to 1.3)  | 25.6 (12.6 to 35.5)       | 3.4 (1.5 to 5.9)                   | 29 (14.1 to 40.5)                      |
| Portugal    | Low physical activity       | 0.4 (0.1 to 0.7) | 9.2 (3.1 to 18.4)         | 0.7 (0.2 to 1.5)                   | 9.9 (3.3 to 19.9)                      | 0.3 (0.1 to 0.6)  | 6.7 (2.1 to 12.8)         | 0.9 (0.3 to 1.9)                   | 7.5 (2.4 to 14.5)                      |

| Location            | Risk factor                 | 1990              |                           |                                    |                                        | 2019               |                           |                                    |                                        |
|---------------------|-----------------------------|-------------------|---------------------------|------------------------------------|----------------------------------------|--------------------|---------------------------|------------------------------------|----------------------------------------|
|                     |                             | Deaths            | YLLs (Years of Life Lost) | YLDs (Years Lived with Disability) | DALYs (Disability-Adjusted Life Years) | Deaths             | YLLs (Years of Life Lost) | YLDs (Years Lived with Disability) | DALYs (Disability-Adjusted Life Years) |
| Portugal            | Smoking                     | 0.8 (0.5 to 1)    | 24.4 (15.9 to 33.7)       | 1.6 (0.9 to 2.6)                   | 26.1 (17.1 to 36.1)                    | 0.5 (0.4 to 0.7)   | 16.9 (10.7 to 23.7)       | 2.2 (1.1 to 3.7)                   | 19.1 (12.1 to 26.7)                    |
| Portugal            | Secondhand smoke            | 0.7 (0.2 to 1.2)  | 21.5 (5.1 to 36.7)        | 1.4 (0.3 to 2.6)                   | 22.9 (5.4 to 39.7)                     | 0.3 (0.1 to 0.6)   | 9.5 (2.3 to 16.7)         | 1.2 (0.3 to 2.4)                   | 10.8 (2.6 to 18.8)                     |
| Portugal            | Metabolic risks             | 2.2 (0.7 to 4.3)  | 39.5 (5.5 to 85.7)        | 3 (0.6 to 6.6)                     | 42.5 (6.3 to 91.7)                     | 2.2 (0.8 to 4.3)   | 39.9 (9.7 to 82.7)        | 5.4 (1.3 to 12.2)                  | 45.4 (11 to 92.9)                      |
| Portugal            | High body-mass index        | 0.7 (0.1 to 1.6)  | 7.8 (-9.4 to 25.8)        | 0.7 (-0.5 to 2)                    | 8.5 (-9.9 to 27.2)                     | 0.7 (0.1 to 1.5)   | 8.9 (-4.6 to 24)          | 1.2 (-0.6 to 3.4)                  | 10.1 (-4.9 to 27)                      |
| Portugal            | High fasting plasma glucose | 1.5 (0.3 to 3.4)  | 33.2 (6.4 to 75)          | 2.5 (0.4 to 5.9)                   | 35.6 (6.9 to 80.8)                     | 1.6 (0.3 to 3.5)   | 32.9 (6.5 to 73.3)        | 4.5 (0.8 to 10.9)                  | 37.4 (7.6 to 83.2)                     |
| Puerto Rico         | All risk factors            | 4.5 (3 to 6.4)    | 112.5 (73.6 to 158.9)     | 7 (4.1 to 10.9)                    | 119.5 (78.3 to 169.3)                  | 4.6 (2.7 to 7.5)   | 110.2 (64.2 to 180.5)     | 10.7 (5.6 to 18.4)                 | 120.9 (69.8 to 198.7)                  |
| Puerto Rico         | Behavioral risks            | 2.4 (1.9 to 3)    | 75 (59.2 to 91.4)         | 4.4 (2.9 to 6.4)                   | 79.4 (62.7 to 96.5)                    | 2.1 (1.5 to 2.9)   | 63 (44.7 to 86.4)         | 5.8 (3.6 to 8.8)                   | 68.9 (48.4 to 94.6)                    |
| Puerto Rico         | Alcohol use                 | 0.9 (0.7 to 1.2)  | 31.5 (23.4 to 41.9)       | 1.8 (1.1 to 2.7)                   | 33.3 (24.7 to 43.9)                    | 0.7 (0.5 to 1)     | 25.8 (17.5 to 36.4)       | 2.3 (1.4 to 3.6)                   | 28.1 (19.2 to 39.6)                    |
| Puerto Rico         | Diet high in red meat       | 0.4 (0.1 to 0.6)  | 13.2 (3.5 to 19)          | 0.8 (0.2 to 1.3)                   | 14 (3.7 to 20.2)                       | 0.4 (0.1 to 0.6)   | 12.1 (3.2 to 19.4)        | 1.1 (0.3 to 2)                     | 13.2 (3.5 to 21.2)                     |
| Puerto Rico         | Low physical activity       | 0.4 (0.1 to 0.8)  | 10.7 (3.4 to 19.6)        | 0.7 (0.2 to 1.3)                   | 11.3 (3.6 to 20.9)                     | 0.4 (0.1 to 0.7)   | 9.9 (3 to 18.2)           | 1 (0.3 to 2)                       | 10.9 (3.3 to 20.1)                     |
| Puerto Rico         | Smoking                     | 0.5 (0.4 to 0.8)  | 14.9 (9.1 to 22.4)        | 0.9 (0.5 to 1.4)                   | 15.8 (9.7 to 23.6)                     | 0.5 (0.3 to 0.7)   | 12.3 (7.6 to 18.7)        | 1.2 (0.6 to 2)                     | 13.5 (8.3 to 20.4)                     |
| Puerto Rico         | Secondhand smoke            | 0.3 (0.1 to 0.5)  | 8.8 (2.1 to 15.4)         | 0.5 (0.1 to 0.9)                   | 9.4 (2.2 to 16.3)                      | 0.2 (0 to 0.4)     | 6.3 (1.5 to 11.8)         | 0.6 (0.1 to 1.1)                   | 6.8 (1.7 to 12.9)                      |
| Puerto Rico         | Metabolic risks             | 2.3 (0.7 to 4.4)  | 42.8 (3.6 to 92.8)        | 3 (0.5 to 6.3)                     | 45.8 (4.2 to 98.5)                     | 2.8 (1 to 5.6)     | 53.8 (8.1 to 120.8)       | 5.5 (1.1 to 12.3)                  | 59.3 (9.1 to 132.5)                    |
| Puerto Rico         | High body-mass index        | 0.8 (0 to 1.7)    | 6.9 (-13.4 to 28.4)       | 0.7 (-0.6 to 2.1)                  | 7.6 (-14 to 29.9)                      | 1 (0.1 to 2.1)     | 10.7 (-13.4 to 35.4)      | 1.3 (-0.9 to 3.8)                  | 12.1 (-14.1 to 39.4)                   |
| Puerto Rico         | High fasting plasma glucose | 1.7 (0.3 to 3.7)  | 38.2 (7.5 to 85.7)        | 2.5 (0.5 to 5.8)                   | 40.7 (8 to 91.9)                       | 2 (0.4 to 4.7)     | 46.6 (9.4 to 109.3)       | 4.6 (0.9 to 11.1)                  | 51.1 (10.4 to 120.3)                   |
| Qatar               | All risk factors            | 7.1 (3.7 to 12.2) | 158.8 (76.1 to 270.3)     | 6.6 (3.1 to 11.9)                  | 165.4 (79.4 to 281.2)                  | 13.6 (7.3 to 21.9) | 250.4 (126.5 to 412.6)    | 20.4 (9.6 to 35.2)                 | 270.8 (137.2 to 443.2)                 |
| Qatar               | Behavioral risks            | 2.5 (1.6 to 3.7)  | 68.2 (42.6 to 99.2)       | 2.7 (1.6 to 4.4)                   | 71 (44.4 to 102.8)                     | 3.3 (2 to 4.7)     | 70.7 (43.1 to 103)        | 5.9 (3.2 to 9.4)                   | 76.5 (46.6 to 110.6)                   |
| Qatar               | Alcohol use                 | 0.2 (0.1 to 0.3)  | 5 (3 to 7.7)              | 0.2 (0.1 to 0.3)                   | 5.2 (3.2 to 8.1)                       | 0.2 (0.1 to 0.2)   | 3.9 (2.2 to 5.9)          | 0.3 (0.2 to 0.5)                   | 4.2 (2.3 to 6.4)                       |
| Qatar               | Diet high in red meat       | 0.8 (0.2 to 1.2)  | 22.2 (7 to 35.1)          | 0.9 (0.3 to 1.5)                   | 23.1 (7.4 to 36.5)                     | 1 (0.3 to 1.5)     | 22.5 (6.5 to 35.5)        | 1.9 (0.5 to 3.2)                   | 24.4 (7.3 to 38.7)                     |
| Qatar               | Low physical activity       | 0.7 (0.3 to 1.3)  | 16.2 (5.8 to 29.3)        | 0.7 (0.2 to 1.3)                   | 16.9 (6.1 to 30.9)                     | 1.2 (0.5 to 2.1)   | 21.7 (8.4 to 38.1)        | 1.8 (0.6 to 3.4)                   | 23.5 (9 to 41.5)                       |
| Qatar               | Smoking                     | 0.2 (0.1 to 0.2)  | 4.3 (2.4 to 7)            | 0.2 (0.1 to 0.3)                   | 4.5 (2.5 to 7.3)                       | 0.2 (0.1 to 0.2)   | 3.7 (2.1 to 6)            | 0.3 (0.1 to 0.5)                   | 4 (2.2 to 6.4)                         |
| Qatar               | Secondhand smoke            | 0.8 (0.2 to 1.4)  | 22.8 (5.6 to 42.1)        | 0.9 (0.2 to 1.7)                   | 23.7 (5.8 to 43.6)                     | 0.9 (0.2 to 1.6)   | 21.3 (4.9 to 39.2)        | 1.7 (0.4 to 3.3)                   | 23 (5.4 to 42.2)                       |
| Qatar               | Metabolic risks             | 5.1 (1.7 to 9.9)  | 99.5 (19.2 to 209.8)      | 4.3 (1 to 9.3)                     | 103.8 (20.3 to 219)                    | 11.4 (4.9 to 19.8) | 197.6 (71.4 to 365.3)     | 16 (5.4 to 30.6)                   | 213.6 (76.9 to 394)                    |
| Qatar               | High body-mass index        | 1.9 (0.2 to 4.1)  | 28.9 (-13.9 to 77.3)      | 1.3 (-0.4 to 3.3)                  | 30.2 (-14.3 to 80.5)                   | 4.2 (1.4 to 7.6)   | 61.3 (3.2 to 126.3)       | 4.6 (0.1 to 10.2)                  | 65.9 (3.3 to 136.6)                    |
| Qatar               | High fasting plasma glucose | 3.5 (0.7 to 8.2)  | 78.2 (16.1 to 182.2)      | 3.3 (0.7 to 8)                     | 81.5 (16.7 to 189.3)                   | 8.3 (1.9 to 16.9)  | 157 (36 to 331.5)         | 13 (2.9 to 28)                     | 170.1 (38.6 to 355.8)                  |
| Republic of Korea   | All risk factors            | 1.8 (1.4 to 2.3)  | 56.3 (43.6 to 69.7)       | 3.6 (2.3 to 5.2)                   | 59.9 (46.4 to 74.4)                    | 2.3 (1.7 to 3)     | 63.2 (47.6 to 80.8)       | 9.1 (5.5 to 13.8)                  | 72.3 (54.1 to 92.6)                    |
| Republic of Korea   | Behavioral risks            | 1.5 (1.2 to 1.8)  | 49.2 (39.5 to 58.9)       | 3 (1.9 to 4.3)                     | 52.1 (41.8 to 62.1)                    | 1.7 (1.4 to 2.1)   | 51.1 (40.8 to 62.7)       | 7.2 (4.5 to 10.7)                  | 58.3 (46.5 to 71.9)                    |
| Republic of Korea   | Alcohol use                 | 0.9 (0.7 to 1.2)  | 31.4 (24.9 to 38.9)       | 1.9 (1.2 to 2.7)                   | 33.3 (26.3 to 41.3)                    | 1.1 (0.8 to 1.4)   | 32.5 (24.5 to 41.9)       | 4.6 (2.8 to 7.1)                   | 37 (27.7 to 48.4)                      |
| Republic of Korea   | Diet high in red meat       | 0.2 (0 to 0.2)    | 5.8 (1.4 to 7.8)          | 0.4 (0.1 to 0.6)                   | 6.2 (1.4 to 8.4)                       | 0.3 (0.1 to 0.5)   | 10.2 (4.3 to 14.2)        | 1.5 (0.6 to 2.4)                   | 11.7 (4.9 to 16.4)                     |
| Republic of Korea   | Low physical activity       | 0.1 (0 to 0.2)    | 2 (0.9 to 4.3)            | 0.1 (0.1 to 0.3)                   | 2.2 (0.9 to 4.7)                       | 0.1 (0 to 0.2)     | 2.4 (1 to 5.1)            | 0.4 (0.1 to 0.8)                   | 2.8 (1.1 to 5.9)                       |
| Republic of Korea   | Smoking                     | 0.1 (0.1 to 0.2)  | 4.5 (3 to 6.3)            | 0.3 (0.2 to 0.5)                   | 4.8 (3.2 to 6.7)                       | 0.1 (0.1 to 0.2)   | 3.7 (2.4 to 5.1)          | 0.5 (0.3 to 0.8)                   | 4.2 (2.8 to 5.9)                       |
| Republic of Korea   | Secondhand smoke            | 0.3 (0.1 to 0.4)  | 8.7 (2.1 to 14.9)         | 0.5 (0.1 to 1)                     | 9.2 (2.3 to 15.9)                      | 0.2 (0 to 0.3)     | 5.8 (1.4 to 10)           | 0.8 (0.2 to 1.5)                   | 6.6 (1.7 to 11.4)                      |
| Republic of Korea   | Metabolic risks             | 0.4 (0.1 to 0.9)  | 8.8 (0.4 to 20.5)         | 0.7 (0.1 to 1.7)                   | 9.5 (0.5 to 21.9)                      | 0.7 (0.2 to 1.5)   | 15 (3.5 to 31.4)          | 2.3 (0.5 to 5.1)                   | 17.2 (4.2 to 36.1)                     |
| Republic of Korea   | High body-mass index        | 0.1 (0 to 0.3)    | 0.6 (-3.3 to 4)           | 0.1 (-0.1 to 0.4)                  | 0.8 (-3.3 to 4.5)                      | 0.2 (0 to 0.5)     | 3.1 (-1.4 to 8.7)         | 0.5 (-0.2 to 1.3)                  | 3.5 (-1.5 to 9.9)                      |
| Republic of Korea   | High fasting plasma glucose | 0.3 (0.1 to 0.8)  | 8.4 (1.6 to 19.5)         | 0.6 (0.1 to 1.5)                   | 9 (1.7 to 20.8)                        | 0.5 (0.1 to 1.2)   | 12.3 (2.4 to 27.7)        | 1.9 (0.3 to 4.7)                   | 14.2 (2.8 to 32.1)                     |
| Republic of Moldova | All risk factors            | 5.3 (4.1 to 6.7)  | 162.7 (124.9 to 200.8)    | 7 (4.6 to 9.9)                     | 169.7 (130.4 to 210.2)                 | 4.2 (2.9 to 5.8)   | 112.4 (78.7 to 153.9)     | 7 (4.3 to 10.6)                    | 119.4 (83.5 to 162.9)                  |
| Republic of Moldova | Behavioral risks            | 4.1 (3.3 to 4.8)  | 136.7 (111 to 163.6)      | 5.7 (3.8 to 8)                     | 142.4 (115.5 to 169.8)                 | 2.6 (2 to 3.3)     | 78.5 (60.2 to 102)        | 4.8 (3.1 to 7)                     | 83.3 (63.8 to 108.3)                   |
| Republic of Moldova | Alcohol use                 | 2.8 (2.2 to 3.4)  | 95.3 (75.1 to 116.8)      | 3.9 (2.6 to 5.7)                   | 99.3 (78.2 to 122)                     | 1.7 (1.3 to 2.3)   | 52.9 (39.5 to 70.6)       | 3.2 (2 to 4.8)                     | 56.1 (41.8 to 75.1)                    |

| Location              | Risk factor                 | 1990              |                           |                                    |                                        | 2019             |                           |                                    |                                        |
|-----------------------|-----------------------------|-------------------|---------------------------|------------------------------------|----------------------------------------|------------------|---------------------------|------------------------------------|----------------------------------------|
|                       |                             | Deaths            | YLLs (Years of Life Lost) | YLDs (Years Lived with Disability) | DALYs (Disability-Adjusted Life Years) | Deaths           | YLLs (Years of Life Lost) | YLDs (Years Lived with Disability) | DALYs (Disability-Adjusted Life Years) |
| Republic of Moldova   | Diet high in red meat       | 0.6 (0.2 to 0.7)  | 18.5 (5.2 to 24.4)        | 0.8 (0.2 to 1.2)                   | 19.2 (5.4 to 25.5)                     | 0.3 (0.1 to 0.5) | 10.1 (2.3 to 15)          | 0.6 (0.1 to 1)                     | 10.7 (2.4 to 15.9)                     |
| Republic of Moldova   | Low physical activity       | 0.1 (0.1 to 0.2)  | 3.6 (2.3 to 6.8)          | 0.2 (0.1 to 0.3)                   | 3.8 (2.4 to 7.2)                       | 0.1 (0.1 to 0.2) | 2.9 (1.7 to 5.2)          | 0.2 (0.1 to 0.4)                   | 3.1 (1.8 to 5.5)                       |
| Republic of Moldova   | Smoking                     | 0.3 (0.2 to 0.4)  | 8.7 (5.2 to 13.4)         | 0.4 (0.2 to 0.6)                   | 9.1 (5.4 to 14)                        | 0.2 (0.2 to 0.3) | 6.7 (4.2 to 9.6)          | 0.4 (0.2 to 0.7)                   | 7.2 (4.5 to 10.3)                      |
| Republic of Moldova   | Secondhand smoke            | 0.5 (0.1 to 0.9)  | 19.1 (4.6 to 32.9)        | 0.8 (0.2 to 1.4)                   | 19.9 (4.7 to 34.3)                     | 0.3 (0.1 to 0.6) | 10.2 (2.3 to 18.3)        | 0.6 (0.1 to 1.1)                   | 10.8 (2.5 to 19.2)                     |
| Republic of Moldova   | Metabolic risks             | 1.5 (0.4 to 2.9)  | 31.3 (-1.3 to 69.6)       | 1.6 (0.2 to 3.4)                   | 32.9 (-1.2 to 72.8)                    | 1.9 (0.7 to 3.4) | 40.2 (10.4 to 77.8)       | 2.7 (0.8 to 5.3)                   | 42.8 (11.4 to 82.4)                    |
| Republic of Moldova   | High body-mass index        | 0.7 (0 to 1.6)    | 8.7 (-13.2 to 31.6)       | 0.6 (-0.4 to 1.6)                  | 9.2 (-13.7 to 33.7)                    | 1.1 (0.2 to 2)   | 19.1 (-1.5 to 41.7)       | 1.3 (0 to 2.8)                     | 20.4 (-1.6 to 44.1)                    |
| Republic of Moldova   | High fasting plasma glucose | 0.9 (0.2 to 2)    | 23.7 (4.5 to 54.3)        | 1.1 (0.2 to 2.6)                   | 24.8 (4.7 to 56.7)                     | 0.9 (0.2 to 2.2) | 23 (4.3 to 55.4)          | 1.5 (0.3 to 3.7)                   | 24.5 (4.6 to 59)                       |
| Romania               | All risk factors            | 4.5 (3.5 to 5.6)  | 128.8 (99.6 to 157.4)     | 5.7 (3.8 to 8.1)                   | 134.5 (103.7 to 163.1)                 | 5.5 (4.1 to 7.4) | 140.9 (104.4 to 189.1)    | 9.5 (6 to 14.3)                    | 150.4 (111.5 to 201.7)                 |
| Romania               | Behavioral risks            | 3.5 (2.8 to 4.1)  | 110.1 (89 to 129.7)       | 4.7 (3.1 to 6.7)                   | 114.8 (92.9 to 135.1)                  | 3.9 (2.9 to 5)   | 110.4 (83 to 142.4)       | 7.5 (4.8 to 11.1)                  | 117.9 (88.5 to 151.6)                  |
| Romania               | Alcohol use                 | 1.5 (1.2 to 1.9)  | 49.9 (37.7 to 62)         | 2.1 (1.3 to 3.1)                   | 52 (39.4 to 64.5)                      | 1.7 (1.2 to 2.3) | 49.9 (35.6 to 67.3)       | 3.4 (2.1 to 5.2)                   | 53.3 (37.8 to 71.8)                    |
| Romania               | Diet high in red meat       | 0.7 (0.3 to 0.9)  | 21 (8.2 to 27.6)          | 0.9 (0.3 to 1.4)                   | 21.9 (8.5 to 28.9)                     | 1 (0.5 to 1.4)   | 27.3 (13.2 to 40.7)       | 1.9 (0.8 to 3.1)                   | 29.1 (14.1 to 43.5)                    |
| Romania               | Low physical activity       | 0.2 (0.1 to 0.3)  | 4.7 (2.6 to 8.2)          | 0.2 (0.1 to 0.4)                   | 5 (2.7 to 8.7)                         | 0.3 (0.1 to 0.5) | 5.7 (2.8 to 10.5)         | 0.4 (0.2 to 0.8)                   | 6.1 (3 to 11.3)                        |
| Romania               | Smoking                     | 0.9 (0.6 to 1.3)  | 29 (18.8 to 40.3)         | 1.2 (0.7 to 2)                     | 30.2 (19.5 to 41.9)                    | 0.8 (0.5 to 1.2) | 24.8 (15.6 to 35.3)       | 1.7 (0.9 to 2.7)                   | 26.5 (16.6 to 37.8)                    |
| Romania               | Secondhand smoke            | 0.5 (0.1 to 0.8)  | 14.9 (3.5 to 26.2)        | 0.6 (0.1 to 1.2)                   | 15.5 (3.7 to 27.2)                     | 0.4 (0.1 to 0.8) | 12.9 (3.1 to 22.9)        | 0.9 (0.2 to 1.7)                   | 13.7 (3.4 to 24.5)                     |
| Romania               | Metabolic risks             | 1.3 (0.4 to 2.4)  | 23.6 (0.6 to 51.2)        | 1.2 (0.1 to 2.5)                   | 24.8 (1 to 53.4)                       | 2.1 (0.8 to 3.9) | 38.9 (8.9 to 80.1)        | 2.5 (0.4 to 5.3)                   | 41.5 (9.2 to 85.5)                     |
| Romania               | High body-mass index        | 0.7 (0 to 1.4)    | 9.1 (-7.9 to 26.5)        | 0.5 (-0.3 to 1.4)                  | 9.6 (-8.1 to 27.9)                     | 1.1 (0.2 to 2.2) | 17.2 (-4.3 to 41.8)       | 1 (-0.4 to 2.7)                    | 18.3 (-4.9 to 44.4)                    |
| Romania               | High fasting plasma glucose | 0.6 (0.1 to 1.4)  | 15.4 (2.8 to 35.9)        | 0.7 (0.1 to 1.8)                   | 16.1 (3 to 37.8)                       | 1 (0.2 to 2.4)   | 23.5 (4.1 to 54.9)        | 1.6 (0.3 to 4)                     | 25.1 (4.4 to 58.5)                     |
| Russian Federation    | All risk factors            | 3.7 (2.8 to 4.6)  | 108.7 (82.2 to 133.8)     | 5.8 (3.8 to 8.2)                   | 114.6 (86.7 to 140.4)                  | 4.8 (3.3 to 6.5) | 126.2 (90.2 to 170.1)     | 9.9 (6.2 to 14.8)                  | 136.1 (97.9 to 182.3)                  |
| Russian Federation    | Behavioral risks            | 2.8 (2.2 to 3.3)  | 92.5 (74.8 to 109.1)      | 4.9 (3.3 to 6.8)                   | 97.4 (78.2 to 114.3)                   | 3.2 (2.4 to 4)   | 96.3 (72.4 to 124.3)      | 7.6 (4.9 to 11.4)                  | 103.9 (78.4 to 132.5)                  |
| Russian Federation    | Alcohol use                 | 1.3 (1 to 1.6)    | 46.3 (36.8 to 55.9)       | 2.4 (1.6 to 3.5)                   | 48.7 (38.4 to 58.7)                    | 1.6 (1.1 to 2.1) | 50.7 (36.6 to 67)         | 4 (2.5 to 6.2)                     | 54.8 (40.1 to 71.6)                    |
| Russian Federation    | Diet high in red meat       | 0.8 (0.4 to 1)    | 24.2 (12.2 to 32.8)       | 1.3 (0.6 to 2)                     | 25.5 (12.8 to 34.5)                    | 0.7 (0.3 to 1)   | 19.1 (8 to 28.1)          | 1.5 (0.6 to 2.5)                   | 20.6 (8.6 to 30.4)                     |
| Russian Federation    | Low physical activity       | 0.1 (0.1 to 0.2)  | 2.8 (1.8 to 5.1)          | 0.2 (0.1 to 0.3)                   | 3 (1.9 to 5.4)                         | 0.2 (0.1 to 0.3) | 3.3 (1.9 to 6)            | 0.3 (0.1 to 0.5)                   | 3.6 (2.1 to 6.4)                       |
| Russian Federation    | Smoking                     | 0.3 (0.2 to 0.5)  | 10.9 (6.1 to 16.5)        | 0.6 (0.3 to 1)                     | 11.5 (6.4 to 17.5)                     | 0.6 (0.3 to 0.8) | 17.3 (10.1 to 25.3)       | 1.4 (0.7 to 2.3)                   | 18.7 (11 to 27)                        |
| Russian Federation    | Secondhand smoke            | 0.5 (0.1 to 0.8)  | 15.5 (3.9 to 26.7)        | 0.8 (0.2 to 1.5)                   | 16.3 (4 to 28.1)                       | 0.4 (0.1 to 0.8) | 13.6 (3.2 to 25.1)        | 1.1 (0.2 to 2)                     | 14.7 (3.4 to 26.7)                     |
| Russian Federation    | Metabolic risks             | 1.1 (0.3 to 2)    | 19 (-2.4 to 43)           | 1.1 (-0.1 to 2.4)                  | 20.1 (-2.5 to 45.4)                    | 1.9 (0.7 to 3.4) | 36 (6.6 to 71.7)          | 2.7 (0.4 to 5.6)                   | 38.7 (7.1 to 76.8)                     |
| Russian Federation    | High body-mass index        | 0.6 (0 to 1.4)    | 7.8 (-9.6 to 25)          | 0.5 (-0.5 to 1.4)                  | 8.3 (-10.1 to 26.5)                    | 1.2 (0.3 to 2.5) | 19.9 (-3.8 to 47.6)       | 1.4 (-0.3 to 3.5)                  | 21.4 (-4.3 to 50.4)                    |
| Russian Federation    | High fasting plasma glucose | 0.5 (0.1 to 1.1)  | 11.8 (2.1 to 27.4)        | 0.7 (0.1 to 1.6)                   | 12.5 (2.2 to 29)                       | 0.8 (0.1 to 1.8) | 17.6 (3.2 to 42)          | 1.4 (0.2 to 3.6)                   | 19 (3.4 to 44.9)                       |
| Rwanda                | All risk factors            | 3.7 (2.4 to 5.2)  | 105.3 (70 to 151.4)       | 2.2 (1.3 to 3.4)                   | 107.6 (71.4 to 154.9)                  | 3.9 (2.6 to 5.6) | 94.9 (62.5 to 138.3)      | 2.8 (1.6 to 4.4)                   | 97.6 (64.4 to 142.1)                   |
| Rwanda                | Behavioral risks            | 2.9 (2 to 3.9)    | 89.2 (60.6 to 124.7)      | 1.8 (1.1 to 2.7)                   | 91.1 (62 to 127.2)                     | 2.7 (1.9 to 3.7) | 72.9 (50.5 to 103.6)      | 2.1 (1.2 to 3.2)                   | 75 (52 to 106.7)                       |
| Rwanda                | Alcohol use                 | 1.9 (1.3 to 2.7)  | 63.2 (40.9 to 89.7)       | 1.3 (0.7 to 1.9)                   | 64.4 (41.6 to 91.6)                    | 1.5 (1 to 2.2)   | 46.4 (30.2 to 67)         | 1.3 (0.7 to 2.1)                   | 47.7 (30.9 to 68.8)                    |
| Rwanda                | Diet high in red meat       | 0.2 (0 to 0.3)    | 5.2 (1.4 to 8.6)          | 0.1 (0 to 0.2)                     | 5.3 (1.5 to 8.7)                       | 0.2 (0 to 0.3)   | 5.9 (1.3 to 9.8)          | 0.2 (0 to 0.3)                     | 6 (1.3 to 10)                          |
| Rwanda                | Low physical activity       | 0.1 (0.1 to 0.2)  | 2.5 (1.5 to 6.4)          | 0.1 (0 to 0.1)                     | 2.6 (1.5 to 6.5)                       | 0.1 (0.1 to 0.2) | 2.2 (1.3 to 5)            | 0.1 (0 to 0.1)                     | 2.3 (1.4 to 5.1)                       |
| Rwanda                | Smoking                     | 0.5 (0.2 to 0.7)  | 9.3 (4.5 to 15.1)         | 0.2 (0.1 to 0.4)                   | 9.5 (4.6 to 15.5)                      | 0.7 (0.4 to 1)   | 12.5 (6.8 to 19.2)        | 0.4 (0.2 to 0.7)                   | 12.9 (6.9 to 19.8)                     |
| Rwanda                | Secondhand smoke            | 0.4 (0.1 to 0.7)  | 12.2 (2.7 to 24.1)        | 0.2 (0.1 to 0.5)                   | 12.4 (2.7 to 24.5)                     | 0.3 (0.1 to 0.5) | 8.8 (2.1 to 16.7)         | 0.2 (0.1 to 0.5)                   | 9 (2.2 to 17.1)                        |
| Rwanda                | Metabolic risks             | 0.9 (0.2 to 2)    | 18.5 (0.5 to 44.9)        | 0.5 (0.1 to 1.1)                   | 19 (0.6 to 46)                         | 1.4 (0.4 to 2.8) | 25.4 (4.7 to 56.2)        | 0.8 (0.2 to 1.7)                   | 26.2 (5 to 57.9)                       |
| Rwanda                | High body-mass index        | 0.2 (0 to 0.7)    | 1.7 (-6.9 to 11.1)        | 0.1 (-0.1 to 0.3)                  | 1.8 (-6.9 to 11.3)                     | 0.5 (0.1 to 1.3) | 7.4 (-5 to 22.9)          | 0.3 (-0.1 to 0.7)                  | 7.7 (-5 to 23.5)                       |
| Rwanda                | High fasting plasma glucose | 0.7 (0.1 to 1.7)  | 17 (2.9 to 42.5)          | 0.4 (0.1 to 1)                     | 17.4 (2.9 to 43.5)                     | 0.9 (0.2 to 2.1) | 18.7 (3.2 to 45.8)        | 0.6 (0.1 to 1.4)                   | 19.2 (3.3 to 47.1)                     |
| Saint Kitts and Nevis | All risk factors            | 9.4 (5.6 to 14.1) | 227.9 (135.8 to 343.4)    | 10.9 (6 to 17.3)                   | 238.8 (142.8 to 360.8)                 | 7.4 (4.1 to 12)  | 163.9 (87.8 to 267.5)     | 11.5 (5.8 to 20)                   | 175.4 (94.3 to 287.1)                  |
| Saint Kitts and Nevis | Behavioral risks            | 4.6 (2.9 to 5.9)  | 138.9 (82.3 to 178.2)     | 6.2 (3.4 to 8.9)                   | 145.1 (86.1 to 186.9)                  | 2.8 (1.7 to 4.2) | 72.1 (40.1 to 116)        | 4.9 (2.5 to 8)                     | 77 (42.5 to 122.4)                     |
| Saint Kitts and Nevis | Alcohol use                 | 1.7 (0.1 to 2.5)  | 59.9 (4.1 to 84.6)        | 2.6 (0.2 to 4)                     | 62.5 (4.2 to 88.2)                     | 0.8 (0 to 1.7)   | 23.5 (0 to 53.6)          | 1.5 (0 to 3.7)                     | 25.1 (0 to 57.3)                       |

| Location                         | Risk factor                 | 1990              |                           |                                    |                                        | 2019               |                           |                                    |                                        |
|----------------------------------|-----------------------------|-------------------|---------------------------|------------------------------------|----------------------------------------|--------------------|---------------------------|------------------------------------|----------------------------------------|
|                                  |                             | Deaths            | YLLs (Years of Life Lost) | YLDs (Years Lived with Disability) | DALYs (Disability-Adjusted Life Years) | Deaths             | YLLs (Years of Life Lost) | YLDs (Years Lived with Disability) | DALYs (Disability-Adjusted Life Years) |
| Saint Kitts and Nevis            | Diet high in red meat       | 1 (0.2 to 1.4)    | 29.6 (6.8 to 40.8)        | 1.3 (0.3 to 2.1)                   | 30.9 (7.2 to 42.7)                     | 0.7 (0.2 to 1.1)   | 18.5 (4.1 to 30.4)        | 1.2 (0.3 to 2.2)                   | 19.8 (4.4 to 32.3)                     |
| Saint Kitts and Nevis            | Low physical activity       | 0.7 (0.3 to 1.4)  | 16.7 (6.1 to 33.3)        | 0.8 (0.3 to 1.6)                   | 17.5 (6.4 to 34.9)                     | 0.6 (0.2 to 1.1)   | 12.7 (4.2 to 24.7)        | 0.9 (0.3 to 1.9)                   | 13.6 (4.5 to 26.5)                     |
| Saint Kitts and Nevis            | Smoking                     | 0.5 (0.3 to 0.7)  | 12.2 (7.6 to 18.1)        | 0.6 (0.3 to 0.9)                   | 12.8 (8.1 to 19.1)                     | 0.4 (0.2 to 0.5)   | 8.3 (5.2 to 12.5)         | 0.6 (0.3 to 1)                     | 8.9 (5.6 to 13.6)                      |
| Saint Kitts and Nevis            | Secondhand smoke            | 0.8 (0.2 to 1.5)  | 26.3 (5.6 to 46.7)        | 1.2 (0.3 to 2.2)                   | 27.4 (6 to 48.6)                       | 0.4 (0.1 to 0.8)   | 11.8 (2.5 to 22.7)        | 0.8 (0.2 to 1.6)                   | 12.6 (2.7 to 24.2)                     |
| Saint Kitts and Nevis            | Metabolic risks             | 5.3 (1.7 to 10.6) | 98.6 (13.6 to 218.5)      | 5.2 (1.1 to 11.4)                  | 103.8 (14.6 to 229)                    | 5.1 (1.8 to 9.9)   | 101.2 (30.4 to 203.2)     | 7.3 (2.1 to 14.9)                  | 108.5 (32.6 to 216.3)                  |
| Saint Kitts and Nevis            | High body-mass index        | 1.4 (-0.1 to 3.3) | 10.6 (-31.8 to 50)        | 0.9 (-0.9 to 3)                    | 11.5 (-32.2 to 53.1)                   | 1.8 (0.4 to 3.8)   | 31.6 (-4.2 to 75.1)       | 2.4 (0 to 5.5)                     | 34 (-4.3 to 81)                        |
| Saint Kitts and Nevis            | High fasting plasma glucose | 4.1 (0.8 to 8.9)  | 92.5 (18.5 to 204.2)      | 4.5 (0.9 to 10.5)                  | 97 (19.5 to 214.4)                     | 3.5 (0.8 to 7.8)   | 75.2 (16 to 171.7)        | 5.3 (1.1 to 13)                    | 80.5 (17.1 to 185.9)                   |
| Saint Lucia                      | All risk factors            | 7.7 (5.1 to 11.3) | 203 (135.7 to 286.1)      | 8.1 (4.7 to 12.5)                  | 211.1 (141 to 297.4)                   | 6.5 (3.9 to 10.2)  | 160.4 (98.9 to 249.5)     | 9 (5 to 15)                        | 169.4 (104.7 to 262.6)                 |
| Saint Lucia                      | Behavioral risks            | 4.4 (3.4 to 5.2)  | 134.2 (105.4 to 161.3)    | 5.1 (3.4 to 7.1)                   | 139.3 (109.7 to 167.6)                 | 3.2 (2.4 to 4)     | 95.2 (71.1 to 119.7)      | 5.1 (3.3 to 7.4)                   | 100.3 (74.6 to 126.4)                  |
| Saint Lucia                      | Alcohol use                 | 2.3 (1.8 to 2.9)  | 76.5 (59.5 to 96.4)       | 2.8 (1.8 to 4.1)                   | 79.4 (61.9 to 100.1)                   | 1.6 (1.2 to 2.1)   | 53.8 (38.8 to 71.7)       | 2.8 (1.8 to 4.3)                   | 56.6 (40.9 to 75.3)                    |
| Saint Lucia                      | Diet high in red meat       | 0.9 (0.3 to 1.2)  | 27.3 (9.9 to 37.1)        | 1 (0.3 to 1.7)                     | 28.4 (10.3 to 38.6)                    | 0.7 (0.2 to 1)     | 19.4 (6.3 to 28.5)        | 1 (0.3 to 1.7)                     | 20.5 (6.6 to 30.1)                     |
| Saint Lucia                      | Low physical activity       | 0.4 (0.2 to 0.8)  | 9.7 (3.6 to 19.1)         | 0.4 (0.1 to 0.8)                   | 10.1 (3.7 to 19.9)                     | 0.4 (0.1 to 0.7)   | 8.9 (2.9 to 17.4)         | 0.5 (0.2 to 1.1)                   | 9.4 (3 to 18.5)                        |
| Saint Lucia                      | Smoking                     | 0.6 (0.4 to 0.8)  | 15.6 (9.5 to 22.8)        | 0.6 (0.3 to 1)                     | 16.2 (9.9 to 23.8)                     | 0.4 (0.2 to 0.6)   | 9.7 (5.9 to 14.4)         | 0.5 (0.3 to 0.9)                   | 10.2 (6.3 to 15.2)                     |
| Saint Lucia                      | Secondhand smoke            | 0.4 (0.1 to 0.7)  | 13 (3 to 22.9)            | 0.5 (0.1 to 0.9)                   | 13.4 (3.1 to 23.7)                     | 0.3 (0.1 to 0.5)   | 8.5 (2 to 15.6)           | 0.4 (0.1 to 0.9)                   | 9 (2.1 to 16.4)                        |
| Saint Lucia                      | Metabolic risks             | 4 (1.2 to 7.8)    | 81.4 (14 to 175.4)        | 3.6 (0.8 to 7.7)                   | 84.9 (14.8 to 181.6)                   | 3.8 (1.1 to 7.5)   | 76.1 (9.5 to 167.4)       | 4.5 (0.9 to 10)                    | 80.7 (10.3 to 177.1)                   |
| Saint Lucia                      | High body-mass index        | 0.7 (-0.1 to 1.8) | 6.4 (-16.4 to 31.4)       | 0.5 (-0.4 to 1.6)                  | 6.8 (-16.8 to 32.7)                    | 0.9 (0 to 2.1)     | 6.6 (-20.3 to 33.9)       | 0.6 (-0.8 to 2.2)                  | 7.2 (-21.2 to 35.8)                    |
| Saint Lucia                      | High fasting plasma glucose | 3.4 (0.7 to 7.3)  | 78.1 (16.7 to 171.8)      | 3.3 (0.7 to 7.4)                   | 81.4 (17.2 to 178.7)                   | 3.2 (0.7 to 6.9)   | 73.9 (15.5 to 163.5)      | 4.2 (0.9 to 9.9)                   | 78.1 (16.3 to 172)                     |
| Saint Vincent and the Grenadines | All risk factors            | 6.2 (3.8 to 9.6)  | 152.4 (94 to 231.5)       | 6.3 (3.6 to 10.3)                  | 158.7 (98 to 241.1)                    | 8.1 (4.8 to 12.7)  | 194.5 (114.7 to 302.6)    | 9.4 (5.1 to 15.7)                  | 203.9 (120.8 to 319.6)                 |
| Saint Vincent and the Grenadines | Behavioral risks            | 3 (2.3 to 3.8)    | 89.6 (68.1 to 111.9)      | 3.5 (2.3 to 5)                     | 93.1 (70.9 to 116)                     | 3.7 (2.8 to 4.7)   | 109.4 (82.2 to 139.6)     | 5 (3.2 to 7.4)                     | 114.4 (86.5 to 146.6)                  |
| Saint Vincent and the Grenadines | Alcohol use                 | 1.3 (1 to 1.7)    | 44.3 (33.3 to 57.5)       | 1.7 (1.1 to 2.4)                   | 46 (34.6 to 59.6)                      | 1.8 (1.3 to 2.3)   | 59.8 (43.7 to 79.2)       | 2.7 (1.7 to 4)                     | 62.4 (45.9 to 82.6)                    |
| Saint Vincent and the Grenadines | Diet high in red meat       | 0.5 (0.1 to 0.6)  | 13.3 (2.5 to 18.8)        | 0.5 (0.1 to 0.9)                   | 13.9 (2.6 to 19.6)                     | 0.6 (0.1 to 0.9)   | 17.5 (3.6 to 25.6)        | 0.8 (0.2 to 1.3)                   | 18.3 (3.8 to 26.9)                     |
| Saint Vincent and the Grenadines | Low physical activity       | 0.5 (0.2 to 0.8)  | 10 (3.8 to 19.9)          | 0.4 (0.2 to 0.9)                   | 10.5 (4 to 20.8)                       | 0.6 (0.2 to 1)     | 12.7 (4 to 24.1)          | 0.6 (0.2 to 1.3)                   | 13.3 (4.2 to 25.5)                     |
| Saint Vincent and the Grenadines | Smoking                     | 0.4 (0.3 to 0.6)  | 10.9 (6.7 to 15.9)        | 0.5 (0.3 to 0.7)                   | 11.4 (6.9 to 16.6)                     | 0.4 (0.3 to 0.6)   | 10.2 (5.9 to 15.4)        | 0.5 (0.3 to 0.8)                   | 10.7 (6.2 to 16.1)                     |
| Saint Vincent and the Grenadines | Secondhand smoke            | 0.5 (0.1 to 0.9)  | 14.5 (3.2 to 26.2)        | 0.6 (0.1 to 1.1)                   | 15.1 (3.4 to 27.2)                     | 0.5 (0.1 to 0.8)   | 14.1 (3.3 to 25.5)        | 0.6 (0.1 to 1.2)                   | 14.8 (3.5 to 26.6)                     |
| Saint Vincent and the Grenadines | Metabolic risks             | 3.5 (1 to 7.1)    | 69.8 (11.7 to 154.9)      | 3.1 (0.7 to 7.1)                   | 73 (12.1 to 160.5)                     | 4.9 (1.6 to 9.9)   | 96.3 (16.7 to 213.3)      | 5 (1.1 to 10.8)                    | 101.3 (17.8 to 222.7)                  |
| Saint Vincent and the Grenadines | High body-mass index        | 0.7 (-0.1 to 1.7) | 5.9 (-15 to 27.5)         | 0.4 (-0.4 to 1.4)                  | 6.3 (-15.4 to 28.8)                    | 1.2 (0 to 2.8)     | 9.8 (-24.5 to 45)         | 0.8 (-0.9 to 2.5)                  | 10.6 (-25.6 to 46.9)                   |
| Saint Vincent and the Grenadines | High fasting plasma glucose | 2.9 (0.6 to 6.5)  | 66.1 (13.3 to 150)        | 2.8 (0.6 to 6.7)                   | 69 (13.8 to 155.4)                     | 4 (0.8 to 8.6)     | 91.5 (18.7 to 202.8)      | 4.5 (0.9 to 10.3)                  | 96 (19.6 to 212.8)                     |
| Samoa                            | All risk factors            | 7.8 (4.4 to 11.7) | 215.3 (121.7 to 321.7)    | 6.9 (3.6 to 10.9)                  | 222.2 (125.9 to 331.5)                 | 10.2 (5.4 to 17.8) | 279.4 (152.3 to 475.7)    | 10.7 (5.4 to 18.8)                 | 290.1 (158.3 to 493.9)                 |
| Samoa                            | Behavioral risks            | 2.8 (1.8 to 4)    | 83.1 (52.6 to 122.5)      | 2.6 (1.6 to 4.1)                   | 85.7 (54.3 to 126.3)                   | 3.3 (1.9 to 5.6)   | 97.3 (55.4 to 164.5)      | 3.7 (2 to 6.5)                     | 101 (57.5 to 171.2)                    |
| Samoa                            | Alcohol use                 | 0.2 (0.1 to 0.4)  | 8.6 (4.6 to 14.1)         | 0.3 (0.1 to 0.5)                   | 8.9 (4.8 to 14.6)                      | 0.3 (0.1 to 0.7)   | 12.2 (5.4 to 24.2)        | 0.5 (0.2 to 1)                     | 12.7 (5.6 to 25)                       |
| Samoa                            | Diet high in red meat       | 0.6 (0.2 to 0.9)  | 18.4 (5.8 to 29.6)        | 0.6 (0.2 to 1)                     | 19 (6.1 to 30.4)                       | 0.7 (0.2 to 1.3)   | 22.1 (6.5 to 41.4)        | 0.8 (0.2 to 1.7)                   | 22.9 (6.7 to 42.8)                     |
| Samoa                            | Low physical activity       | 0.4 (0.1 to 0.7)  | 9.8 (3.3 to 19.7)         | 0.3 (0.1 to 0.7)                   | 10.1 (3.4 to 20.4)                     | 0.5 (0.1 to 1)     | 12.2 (3.7 to 26.4)        | 0.5 (0.1 to 1.1)                   | 12.6 (3.8 to 27.3)                     |
| Samoa                            | Smoking                     | 0.8 (0.5 to 1.3)  | 23.9 (13.9 to 37.6)       | 0.8 (0.4 to 1.2)                   | 24.6 (14.3 to 38.7)                    | 1 (0.6 to 1.7)     | 27.1 (15.5 to 47.6)       | 1 (0.5 to 1.8)                     | 28.1 (16.2 to 49.7)                    |
| Samoa                            | Secondhand smoke            | 0.9 (0.2 to 1.6)  | 27.1 (6 to 51.4)          | 0.8 (0.2 to 1.6)                   | 27.9 (6.2 to 53.1)                     | 0.9 (0.2 to 2.1)   | 29.3 (6.4 to 64.9)        | 1.1 (0.2 to 2.4)                   | 30.4 (6.6 to 67.5)                     |
| Samoa                            | Metabolic risks             | 5.8 (2.4 to 9.7)  | 153.8 (60.8 to 255.8)     | 5 (1.9 to 8.8)                     | 158.7 (62.8 to 263.1)                  | 8 (3.4 to 15)      | 211.3 (90.9 to 397.2)     | 8.1 (3.3 to 15.6)                  | 219.5 (94.4 to 411.2)                  |
| Samoa                            | High body-mass index        | 4.6 (1.4 to 8.3)  | 122.3 (39.8 to 219.7)     | 3.9 (1.2 to 7.4)                   | 126.2 (41.2 to 227.5)                  | 5.7 (1.7 to 11.5)  | 148.4 (45.7 to 296.4)     | 5.7 (1.7 to 11.6)                  | 154.1 (47.4 to 305.7)                  |
| Samoa                            | High fasting plasma glucose | 1.6 (0.3 to 3.8)  | 41.9 (8 to 101.2)         | 1.4 (0.2 to 3.4)                   | 43.2 (8.2 to 105.3)                    | 3.2 (0.7 to 8.4)   | 84 (17.9 to 219)          | 3.3 (0.7 to 8.2)                   | 87.3 (18.6 to 226.3)                   |
| San Marino                       | All risk factors            | 6.4 (4.2 to 8.4)  | 152.8 (96.3 to 205.6)     | 15 (8.8 to 22.6)                   | 167.8 (106.4 to 223.7)                 | 6.4 (3.6 to 10.3)  | 152.4 (81.5 to 255.1)     | 19.6 (10.8 to 31.8)                | 172 (94 to 284.9)                      |

| Location              | Risk factor                 | 1990              |                           |                                    |                                        | 2019              |                           |                                    |                                        |
|-----------------------|-----------------------------|-------------------|---------------------------|------------------------------------|----------------------------------------|-------------------|---------------------------|------------------------------------|----------------------------------------|
|                       |                             | Deaths            | YLLs (Years of Life Lost) | YLDs (Years Lived with Disability) | DALYs (Disability-Adjusted Life Years) | Deaths            | YLLs (Years of Life Lost) | YLDs (Years Lived with Disability) | DALYs (Disability-Adjusted Life Years) |
| San Marino            | Behavioral risks            | 4.9 (3 to 6.6)    | 129.2 (76.3 to 175.3)     | 12.5 (6.7 to 19.2)                 | 141.7 (83.4 to 191.3)                  | 4.5 (2.3 to 7.4)  | 121.2 (60.5 to 201.2)     | 15.5 (8 to 24.9)                   | 136.7 (70.1 to 224.2)                  |
| San Marino            | Alcohol use                 | 2.3 (0.2 to 3.5)  | 61.7 (5.2 to 94)          | 5.9 (0.5 to 10.1)                  | 67.6 (5.7 to 103.2)                    | 2.3 (0.3 to 4.1)  | 63.1 (7 to 114.1)         | 8.1 (0.9 to 14.3)                  | 71.2 (7.8 to 126.3)                    |
| San Marino            | Diet high in red meat       | 1 (0.5 to 1.5)    | 26.6 (12.5 to 39.3)       | 2.6 (1.2 to 4.2)                   | 29.2 (13.7 to 43.4)                    | 1 (0.4 to 1.8)    | 26.4 (11.4 to 48.4)       | 3.4 (1.5 to 5.9)                   | 29.8 (13.1 to 53.6)                    |
| San Marino            | Low physical activity       | 0.4 (0.1 to 0.7)  | 7.5 (2.4 to 15.1)         | 0.8 (0.2 to 1.7)                   | 8.3 (2.6 to 16.7)                      | 0.4 (0.1 to 0.8)  | 7.9 (2.3 to 16.9)         | 1 (0.3 to 2.2)                     | 8.9 (2.7 to 19)                        |
| San Marino            | Smoking                     | 1.4 (0.9 to 1.9)  | 37.4 (24.4 to 52.8)       | 3.6 (1.9 to 5.6)                   | 40.9 (26.7 to 57.8)                    | 1 (0.5 to 1.6)    | 27.2 (14.8 to 47.5)       | 3.5 (1.8 to 5.7)                   | 30.7 (17.1 to 52.8)                    |
| San Marino            | Secondhand smoke            | 0.4 (0.1 to 0.6)  | 10.3 (2.4 to 18.8)        | 1 (0.2 to 1.8)                     | 11.3 (2.6 to 20.3)                     | 0.3 (0.1 to 0.6)  | 8.5 (1.9 to 17.5)         | 1.1 (0.2 to 2.1)                   | 9.6 (2.1 to 19.6)                      |
| San Marino            | Metabolic risks             | 1.9 (0.7 to 3.6)  | 31.4 (7.3 to 64)          | 3.3 (0.8 to 6.6)                   | 34.7 (8.3 to 70)                       | 2.4 (0.8 to 5.3)  | 41 (7.8 to 100.1)         | 5.3 (1.1 to 11.7)                  | 46.3 (9 to 111.6)                      |
| San Marino            | High body-mass index        | 1 (0.2 to 2.2)    | 15.1 (-2.1 to 36.3)       | 1.6 (0 to 3.6)                     | 16.7 (-2 to 40)                        | 1.1 (0.2 to 2.5)  | 14.4 (-4.4 to 42.7)       | 1.8 (-0.6 to 5.1)                  | 16.2 (-5.2 to 47.1)                    |
| San Marino            | High fasting plasma glucose | 0.9 (0.2 to 2.2)  | 17.5 (3.1 to 42.6)        | 1.8 (0.3 to 4.4)                   | 19.3 (3.4 to 45.9)                     | 1.4 (0.3 to 3.8)  | 28.5 (4.8 to 78.2)        | 3.7 (0.6 to 9.8)                   | 32.3 (5.7 to 87.7)                     |
| Sao Tome and Principe | All risk factors            | 1.8 (1.1 to 2.8)  | 44.9 (27.4 to 68.4)       | 1.2 (0.7 to 2)                     | 46.1 (28.1 to 70.1)                    | 4 (2.1 to 7.4)    | 93.9 (48.5 to 173.1)      | 3.2 (1.6 to 5.8)                   | 97.1 (50.2 to 180)                     |
| Sao Tome and Principe | Behavioral risks            | 1 (0.7 to 1.4)    | 30.2 (19.9 to 41.9)       | 0.8 (0.4 to 1.2)                   | 31 (20.4 to 43.1)                      | 2 (1.2 to 3.1)    | 58.7 (34 to 89.2)         | 1.9 (1 to 3.1)                     | 60.6 (35.3 to 91.8)                    |
| Sao Tome and Principe | Alcohol use                 | 0.7 (0.5 to 1)    | 21.1 (13.4 to 30.6)       | 0.5 (0.3 to 0.9)                   | 21.7 (13.7 to 31.4)                    | 1.5 (0.8 to 2.3)  | 43.4 (24.5 to 68.1)       | 1.4 (0.7 to 2.3)                   | 44.8 (25.1 to 70.2)                    |
| Sao Tome and Principe | Diet high in red meat       | 0.1 (0 to 0.1)    | 2.2 (0.9 to 3.3)          | 0.1 (0 to 0.1)                     | 2.3 (0.9 to 3.4)                       | 0.1 (0 to 0.2)    | 3.9 (1.3 to 7.1)          | 0.1 (0 to 0.2)                     | 4 (1.4 to 7.3)                         |
| Sao Tome and Principe | Low physical activity       | 0.1 (0.1 to 0.2)  | 2.4 (1.3 to 4.4)          | 0.1 (0 to 0.1)                     | 2.5 (1.4 to 4.6)                       | 0.2 (0.1 to 0.4)  | 4.4 (2 to 8.9)            | 0.1 (0.1 to 0.3)                   | 4.5 (2.1 to 9.3)                       |
| Sao Tome and Principe | Smoking                     | 0.1 (0 to 0.1)    | 1.3 (0.6 to 2.3)          | 0 (0 to 0.1)                       | 1.4 (0.6 to 2.3)                       | 0.1 (0.1 to 0.2)  | 3 (1.3 to 5.5)            | 0.1 (0 to 0.2)                     | 3.1 (1.3 to 5.6)                       |
| Sao Tome and Principe | Secondhand smoke            | 0.1 (0 to 0.2)    | 3.8 (0.8 to 7.4)          | 0.1 (0 to 0.2)                     | 3.9 (0.8 to 7.6)                       | 0.2 (0 to 0.4)    | 5.5 (1.2 to 11.8)         | 0.2 (0 to 0.4)                     | 5.6 (1.2 to 12.2)                      |
| Sao Tome and Principe | Metabolic risks             | 0.9 (0.3 to 1.8)  | 16 (2.1 to 36)            | 0.5 (0.1 to 1.1)                   | 16.5 (2.2 to 37.1)                     | 2.1 (0.6 to 5)    | 39.2 (5.2 to 101.6)       | 1.4 (0.3 to 3.5)                   | 40.6 (5.5 to 105.2)                    |
| Sao Tome and Principe | High body-mass index        | 0.3 (0 to 0.7)    | 4 (-4 to 13.1)            | 0.2 (-0.1 to 0.5)                  | 4.2 (-4 to 13.6)                       | 0.8 (0.1 to 2)    | 10.2 (-8.5 to 35)         | 0.4 (-0.2 to 1.3)                  | 10.6 (-8.8 to 36.2)                    |
| Sao Tome and Principe | High fasting plasma glucose | 0.6 (0.1 to 1.4)  | 12.5 (2.3 to 30.4)        | 0.4 (0.1 to 0.9)                   | 12.8 (2.3 to 31.3)                     | 1.4 (0.3 to 4)    | 30.7 (5.8 to 85.7)        | 1.1 (0.2 to 2.8)                   | 31.8 (6 to 88.7)                       |
| Saudi Arabia          | All risk factors            | 1.8 (0.9 to 3.1)  | 43.2 (20.1 to 75.8)       | 1.5 (0.7 to 2.8)                   | 44.8 (21 to 77.9)                      | 3.5 (1.8 to 5.8)  | 79.2 (35.8 to 137.5)      | 5.3 (2.2 to 9.7)                   | 84.5 (38.2 to 146.5)                   |
| Saudi Arabia          | Behavioral risks            | 0.8 (0.5 to 1.3)  | 25.7 (15.2 to 39.9)       | 0.8 (0.5 to 1.3)                   | 26.5 (15.7 to 41)                      | 1.3 (0.8 to 2)    | 38 (22.3 to 57.4)         | 2.6 (1.4 to 4.3)                   | 40.6 (23.6 to 61.3)                    |
| Saudi Arabia          | Alcohol use                 | 0 (0 to 0.1)      | 1.6 (0.5 to 3)            | 0 (0 to 0.1)                       | 1.6 (0.5 to 3.1)                       | 0 (0 to 0.1)      | 1.1 (0.3 to 2.2)          | 0.1 (0 to 0.2)                     | 1.2 (0.3 to 2.3)                       |
| Saudi Arabia          | Diet high in red meat       | 0.2 (0 to 0.3)    | 6.1 (1.1 to 10.1)         | 0.2 (0 to 0.3)                     | 6.3 (1.2 to 10.3)                      | 0.2 (0 to 0.4)    | 7.3 (1.4 to 11.6)         | 0.5 (0.1 to 0.9)                   | 7.8 (1.5 to 12.4)                      |
| Saudi Arabia          | Low physical activity       | 0.3 (0.1 to 0.6)  | 8.3 (2.7 to 15.6)         | 0.3 (0.1 to 0.5)                   | 8.5 (2.8 to 16)                        | 0.6 (0.2 to 1)    | 15.5 (5.1 to 27.8)        | 1.1 (0.3 to 2)                     | 16.6 (5.4 to 30.1)                     |
| Saudi Arabia          | Smoking                     | 0.1 (0 to 0.1)    | 1.5 (0.8 to 2.5)          | 0 (0 to 0.1)                       | 1.6 (0.8 to 2.5)                       | 0.1 (0.1 to 0.1)  | 2.3 (1.3 to 3.6)          | 0.2 (0.1 to 0.3)                   | 2.4 (1.4 to 3.8)                       |
| Saudi Arabia          | Secondhand smoke            | 0.3 (0.1 to 0.5)  | 9.1 (2.1 to 17.9)         | 0.3 (0.1 to 0.5)                   | 9.3 (2.2 to 18.5)                      | 0.4 (0.1 to 0.8)  | 13.1 (2.9 to 24)          | 0.9 (0.2 to 1.7)                   | 13.9 (3.2 to 25.6)                     |
| Saudi Arabia          | Metabolic risks             | 1 (0.2 to 2.2)    | 19.1 (-2.6 to 49.3)       | 0.8 (0.1 to 1.8)                   | 19.9 (-2.5 to 51.1)                    | 2.4 (0.7 to 4.8)  | 45.5 (0.6 to 104.5)       | 3 (-0.1 to 7)                      | 48.5 (0.3 to 110.8)                    |
| Saudi Arabia          | High body-mass index        | 0.3 (-0.1 to 0.8) | 1.3 (-12.8 to 13.5)       | 0.2 (-0.2 to 0.6)                  | 1.4 (-13 to 13.9)                      | 0.9 (-0.1 to 1.9) | 7.3 (-20.3 to 33.2)       | 0.3 (-1.7 to 2)                    | 7.6 (-21.9 to 35.1)                    |
| Saudi Arabia          | High fasting plasma glucose | 0.7 (0.1 to 1.8)  | 18.7 (3.4 to 45.3)        | 0.7 (0.1 to 1.7)                   | 19.4 (3.5 to 46.9)                     | 1.7 (0.3 to 3.9)  | 41.8 (8 to 97.1)          | 2.9 (0.5 to 6.8)                   | 44.7 (8.6 to 104)                      |
| Senegal               | All risk factors            | 2.3 (1.2 to 3.7)  | 54.7 (29.5 to 88.7)       | 1.4 (0.7 to 2.5)                   | 56.1 (30.3 to 90.9)                    | 3.5 (1.8 to 6.1)  | 78.5 (37.9 to 135.9)      | 2.3 (1 to 4.3)                     | 80.9 (39 to 139.5)                     |
| Senegal               | Behavioral risks            | 1.1 (0.7 to 1.7)  | 33.8 (19.1 to 51.2)       | 0.8 (0.4 to 1.3)                   | 34.6 (19.6 to 52.5)                    | 1.2 (0.7 to 1.9)  | 35.1 (19.4 to 53.7)       | 1 (0.5 to 1.6)                     | 36.1 (20 to 55.2)                      |
| Senegal               | Alcohol use                 | 0.2 (0.1 to 0.2)  | 5.4 (3.3 to 7.9)          | 0.1 (0.1 to 0.2)                   | 5.5 (3.4 to 8.1)                       | 0.1 (0.1 to 0.2)  | 4.7 (2.6 to 7.4)          | 0.1 (0.1 to 0.2)                   | 4.8 (2.6 to 7.6)                       |
| Senegal               | Diet high in red meat       | 0.3 (0.1 to 0.4)  | 7.8 (1.5 to 12)           | 0.2 (0 to 0.3)                     | 8 (1.5 to 12.3)                        | 0.3 (0.1 to 0.5)  | 9.5 (1.8 to 15.7)         | 0.3 (0 to 0.5)                     | 9.7 (1.9 to 16.2)                      |
| Senegal               | Low physical activity       | 0.1 (0.1 to 0.3)  | 3.5 (1.8 to 6.2)          | 0.1 (0 to 0.2)                     | 3.6 (1.9 to 6.4)                       | 0.2 (0.1 to 0.4)  | 4.6 (2.3 to 8.7)          | 0.1 (0.1 to 0.3)                   | 4.7 (2.4 to 8.9)                       |
| Senegal               | Smoking                     | 0.1 (0 to 0.1)    | 1.5 (0.7 to 2.6)          | 0 (0 to 0.1)                       | 1.5 (0.7 to 2.7)                       | 0.1 (0 to 0.1)    | 1.7 (0.7 to 2.9)          | 0 (0 to 0.1)                       | 1.7 (0.8 to 3)                         |
| Senegal               | Secondhand smoke            | 0.6 (0.1 to 1)    | 16.5 (4 to 30.1)          | 0.4 (0.1 to 0.7)                   | 16.9 (4.1 to 30.9)                     | 0.5 (0.1 to 1)    | 15.4 (3.2 to 28.6)        | 0.4 (0.1 to 0.8)                   | 15.8 (3.3 to 29.3)                     |
| Senegal               | Metabolic risks             | 1.2 (0.3 to 2.6)  | 22.4 (1.6 to 52.9)        | 0.7 (0.1 to 1.5)                   | 23.1 (1.7 to 54)                       | 2.4 (0.8 to 4.9)  | 46.1 (8.8 to 102.2)       | 1.4 (0.3 to 3.2)                   | 47.6 (9.3 to 105.6)                    |
| Senegal               | High body-mass index        | 0.3 (0 to 0.8)    | 2.5 (-7.6 to 13.4)        | 0.1 (-0.1 to 0.4)                  | 2.6 (-7.7 to 13.7)                     | 0.7 (0.1 to 1.6)  | 9.1 (-7.1 to 29.8)        | 0.3 (-0.1 to 0.9)                  | 9.4 (-7.2 to 30.8)                     |
| Senegal               | High fasting plasma glucose | 0.9 (0.2 to 2.2)  | 20.5 (3.8 to 49.6)        | 0.5 (0.1 to 1.4)                   | 21.1 (3.9 to 50.9)                     | 1.8 (0.3 to 4.1)  | 38.9 (7.2 to 91.7)        | 1.2 (0.2 to 2.9)                   | 40.1 (7.4 to 94.2)                     |
| Serbia                | All risk factors            | 7.2 (5.1 to 9.6)  | 188.6 (135.3 to 247.2)    | 9.1 (5.6 to 13.4)                  | 197.8 (141.7 to 258.4)                 | 9 (5.9 to 13.2)   | 213.3 (142.9 to 317.2)    | 16.2 (9.7 to 25.7)                 | 229.5 (154.3 to 339.6)                 |

| Location     | Risk factor                 | 1990             |                           |                                    |                                        | 2019              |                           |                                    |                                        |
|--------------|-----------------------------|------------------|---------------------------|------------------------------------|----------------------------------------|-------------------|---------------------------|------------------------------------|----------------------------------------|
|              |                             | Deaths           | YLLs (Years of Life Lost) | YLDs (Years Lived with Disability) | DALYs (Disability-Adjusted Life Years) | Deaths            | YLLs (Years of Life Lost) | YLDs (Years Lived with Disability) | DALYs (Disability-Adjusted Life Years) |
| Serbia       | Behavioral risks            | 4.8 (3.8 to 5.9) | 142.7 (112.8 to 176.4)    | 6.7 (4.3 to 9.7)                   | 149.4 (117.8 to 184.2)                 | 5.2 (3.8 to 6.9)  | 142 (101.9 to 192.4)      | 10.9 (6.7 to 16.6)                 | 152.9 (110 to 206.4)                   |
| Serbia       | Alcohol use                 | 1.5 (1 to 2)     | 48.1 (34 to 64.1)         | 2.2 (1.4 to 3.4)                   | 50.3 (35.6 to 66.7)                    | 1.5 (1 to 2.1)    | 43.5 (29.5 to 62.2)       | 3.3 (2 to 5.3)                     | 46.8 (31.8 to 67)                      |
| Serbia       | Diet high in red meat       | 0.8 (0.2 to 1.1) | 23.3 (7.4 to 31.8)        | 1.1 (0.3 to 1.8)                   | 24.4 (7.7 to 33.4)                     | 0.8 (0.2 to 1.3)  | 22.1 (6.5 to 34.3)        | 1.7 (0.5 to 2.9)                   | 23.8 (6.9 to 37.4)                     |
| Serbia       | Low physical activity       | 0.2 (0.1 to 0.4) | 5.6 (3.3 to 9.8)          | 0.3 (0.1 to 0.5)                   | 5.9 (3.5 to 10.2)                      | 0.3 (0.2 to 0.5)  | 6.3 (3.5 to 11)           | 0.5 (0.2 to 0.9)                   | 6.8 (3.7 to 11.8)                      |
| Serbia       | Smoking                     | 1.9 (1.3 to 2.7) | 57.1 (36.6 to 79.8)       | 2.7 (1.5 to 4.2)                   | 59.8 (38.1 to 83.3)                    | 2.3 (1.6 to 3.2)  | 62.9 (41.8 to 90.5)       | 4.8 (2.7 to 7.8)                   | 67.7 (45 to 97.8)                      |
| Serbia       | Secondhand smoke            | 0.7 (0.2 to 1.2) | 19.7 (4.6 to 33.9)        | 0.9 (0.2 to 1.8)                   | 20.6 (4.8 to 35.6)                     | 0.7 (0.2 to 1.3)  | 18.3 (4.6 to 33.5)        | 1.4 (0.3 to 2.7)                   | 19.7 (4.9 to 36.3)                     |
| Serbia       | Metabolic risks             | 2.9 (1.1 to 5.4) | 56.7 (12.7 to 113.3)      | 2.9 (0.7 to 5.8)                   | 59.6 (13.4 to 118.4)                   | 4.6 (1.8 to 8.8)  | 88.4 (26.8 to 178.8)      | 6.6 (1.9 to 13.7)                  | 95 (29.2 to 191.8)                     |
| Serbia       | High body-mass index        | 1.4 (0.3 to 2.7) | 21.8 (-6.3 to 51.7)       | 1.2 (-0.2 to 2.9)                  | 23 (-6.4 to 54.4)                      | 2.1 (0.6 to 4.2)  | 35.8 (2.2 to 79.5)        | 2.5 (0.1 to 6)                     | 38.3 (2.3 to 85.3)                     |
| Serbia       | High fasting plasma glucose | 1.7 (0.3 to 3.8) | 37.4 (7 to 87.4)          | 1.9 (0.3 to 4.5)                   | 39.3 (7.3 to 91.7)                     | 2.8 (0.5 to 6.3)  | 57.6 (10.9 to 133.3)      | 4.4 (0.8 to 10.9)                  | 62 (11.7 to 143.8)                     |
| Seychelles   | All risk factors            | 4.2 (2.3 to 6.2) | 119.7 (67.7 to 176.7)     | 4.1 (2.2 to 6.5)                   | 123.8 (70 to 181.9)                    | 8.8 (5.1 to 13.3) | 233 (138 to 343.8)        | 11.3 (6 to 17.5)                   | 244.3 (145 to 360.3)                   |
| Seychelles   | Behavioral risks            | 1.3 (0.8 to 1.7) | 40.6 (25.2 to 56.1)       | 1.4 (0.8 to 2.1)                   | 41.9 (26.1 to 57.9)                    | 2.4 (1.5 to 3.2)  | 70.7 (46.2 to 98.4)       | 3.5 (2 to 5.3)                     | 74.1 (48.3 to 102.5)                   |
| Seychelles   | Alcohol use                 | 0.3 (0.2 to 0.4) | 10.6 (7.1 to 15.1)        | 0.3 (0.2 to 0.5)                   | 10.9 (7.3 to 15.6)                     | 0.8 (0.5 to 1.2)  | 26.1 (16.2 to 38)         | 1.3 (0.7 to 2)                     | 27.4 (17.2 to 39.9)                    |
| Seychelles   | Diet high in red meat       | 0.2 (0 to 0.3)   | 6 (1.4 to 9.2)            | 0.2 (0 to 0.3)                     | 6.2 (1.4 to 9.5)                       | 0.3 (0.1 to 0.5)  | 10.1 (2 to 15.8)          | 0.5 (0.1 to 0.9)                   | 10.6 (2.1 to 16.5)                     |
| Seychelles   | Low physical activity       | 0.1 (0.1 to 0.2) | 2.5 (1.5 to 4.9)          | 0.1 (0 to 0.2)                     | 2.6 (1.6 to 5.1)                       | 0.2 (0.1 to 0.4)  | 4.3 (2.4 to 7.9)          | 0.2 (0.1 to 0.4)                   | 4.5 (2.5 to 8.2)                       |
| Seychelles   | Smoking                     | 0.2 (0.1 to 0.3) | 5.3 (2.9 to 8.5)          | 0.2 (0.1 to 0.3)                   | 5.5 (3 to 8.8)                         | 0.3 (0.2 to 0.5)  | 8.2 (4.8 to 12.7)         | 0.4 (0.2 to 0.7)                   | 8.6 (5 to 13.3)                        |
| Seychelles   | Secondhand smoke            | 0.5 (0.1 to 0.9) | 17.4 (3.8 to 30.5)        | 0.6 (0.1 to 1.1)                   | 18 (4 to 31.6)                         | 0.8 (0.2 to 1.4)  | 24.6 (6.2 to 44.2)        | 1.2 (0.3 to 2.3)                   | 25.8 (6.4 to 46.2)                     |
| Seychelles   | Metabolic risks             | 3.2 (1.3 to 5.4) | 86.5 (37.1 to 145.3)      | 3 (1.2 to 5.2)                     | 89.5 (38.4 to 150.7)                   | 7.1 (3.4 to 11.8) | 179.7 (83.1 to 295.7)     | 8.7 (3.8 to 14.8)                  | 188.4 (86.9 to 308.5)                  |
| Seychelles   | High body-mass index        | 2.5 (0.9 to 4.5) | 70.9 (25.2 to 126.5)      | 2.4 (0.8 to 4.5)                   | 73.2 (25.9 to 130.5)                   | 4.6 (1.6 to 8.4)  | 124.8 (43.7 to 221.3)     | 6 (2 to 10.6)                      | 130.8 (45.8 to 230.3)                  |
| Seychelles   | High fasting plasma glucose | 0.8 (0.2 to 1.9) | 19.3 (3.6 to 45.7)        | 0.7 (0.1 to 1.7)                   | 20 (3.7 to 47.5)                       | 3.1 (0.7 to 6.7)  | 70.3 (14.4 to 154.4)      | 3.5 (0.7 to 8.2)                   | 73.7 (15.1 to 161.7)                   |
| Sierra Leone | All risk factors            | 2 (1.3 to 2.8)   | 52.5 (34.2 to 76.2)       | 1.3 (0.7 to 2)                     | 53.8 (35 to 77.7)                      | 3.1 (1.8 to 4.8)  | 78.4 (46.5 to 123.5)      | 2.2 (1.2 to 3.7)                   | 80.6 (48 to 127.4)                     |
| Sierra Leone | Behavioral risks            | 1.5 (1 to 2.2)   | 44.6 (29.2 to 64.8)       | 1 (0.6 to 1.6)                     | 45.6 (29.9 to 66.4)                    | 1.9 (1.2 to 2.9)  | 55.9 (34.4 to 84.2)       | 1.5 (0.8 to 2.5)                   | 57.4 (35.1 to 86.5)                    |
| Sierra Leone | Alcohol use                 | 0.8 (0.5 to 1.2) | 25.1 (15.6 to 37)         | 0.6 (0.3 to 0.9)                   | 25.7 (16 to 37.8)                      | 1 (0.6 to 1.6)    | 30.4 (18.6 to 47.2)       | 0.8 (0.5 to 1.4)                   | 31.2 (19 to 48.4)                      |
| Sierra Leone | Diet high in red meat       | 0.1 (0 to 0.1)   | 2.2 (0.7 to 3.6)          | 0.1 (0 to 0.1)                     | 2.3 (0.8 to 3.7)                       | 0.1 (0 to 0.2)    | 4 (1 to 7.1)              | 0.1 (0 to 0.2)                     | 4.2 (1.1 to 7.3)                       |
| Sierra Leone | Low physical activity       | 0.1 (0.1 to 0.2) | 2.4 (1.3 to 4.4)          | 0.1 (0 to 0.1)                     | 2.4 (1.3 to 4.5)                       | 0.2 (0.1 to 0.3)  | 3.6 (1.8 to 6.9)          | 0.1 (0 to 0.2)                     | 3.7 (1.9 to 7)                         |
| Sierra Leone | Smoking                     | 0.2 (0.1 to 0.3) | 5.7 (2.3 to 9.8)          | 0.1 (0.1 to 0.3)                   | 5.8 (2.3 to 10)                        | 0.2 (0.1 to 0.3)  | 5 (2.1 to 9)              | 0.1 (0.1 to 0.3)                   | 5.2 (2.2 to 9.2)                       |
| Sierra Leone | Secondhand smoke            | 0.4 (0.1 to 0.7) | 11.2 (2.6 to 21.2)        | 0.3 (0.1 to 0.5)                   | 11.4 (2.7 to 21.7)                     | 0.5 (0.1 to 1)    | 15 (3.4 to 29.7)          | 0.4 (0.1 to 0.8)                   | 15.4 (3.5 to 30.4)                     |
| Sierra Leone | Metabolic risks             | 0.5 (0.1 to 1)   | 9.1 (1.6 to 20.8)         | 0.3 (0.1 to 0.6)                   | 9.3 (1.7 to 21.4)                      | 1.3 (0.4 to 2.7)  | 25.3 (5.4 to 58.1)        | 0.8 (0.2 to 1.7)                   | 26.1 (5.6 to 59.5)                     |
| Sierra Leone | High body-mass index        | 0.2 (0 to 0.5)   | 3.1 (-1.5 to 9.9)         | 0.1 (0 to 0.3)                     | 3.2 (-1.6 to 10.2)                     | 0.5 (0.1 to 1.1)  | 8.1 (-3.5 to 23.4)        | 0.3 (0 to 0.7)                     | 8.4 (-3.6 to 24)                       |
| Sierra Leone | High fasting plasma glucose | 0.3 (0.1 to 0.8) | 6.1 (1.1 to 15.9)         | 0.2 (0 to 0.4)                     | 6.2 (1.1 to 16.2)                      | 0.8 (0.1 to 2.1)  | 17.8 (3.1 to 45.4)        | 0.5 (0.1 to 1.4)                   | 18.4 (3.2 to 46.6)                     |
| Singapore    | All risk factors            | 2.9 (1.9 to 4.2) | 80.5 (53.6 to 114.3)      | 6.1 (3.6 to 9.8)                   | 86.6 (57.4 to 123.2)                   | 2.6 (1.7 to 3.7)  | 65.5 (42.9 to 92.6)       | 9.3 (5.2 to 15.2)                  | 74.8 (49 to 105.3)                     |
| Singapore    | Behavioral risks            | 1.8 (1.3 to 2.1) | 55.1 (41 to 66.8)         | 4 (2.6 to 5.8)                     | 59.1 (44.5 to 72.5)                    | 1.5 (1.1 to 1.8)  | 42 (31.4 to 51.7)         | 5.8 (3.6 to 8.8)                   | 47.9 (35.4 to 59.2)                    |
| Singapore    | Alcohol use                 | 0.5 (0.4 to 0.6) | 16.5 (12 to 21.4)         | 1.2 (0.7 to 1.8)                   | 17.6 (12.8 to 23)                      | 0.4 (0.3 to 0.6)  | 13.2 (9.6 to 17.6)        | 1.8 (1.1 to 2.9)                   | 15.1 (10.7 to 19.9)                    |
| Singapore    | Diet high in red meat       | 0.5 (0.2 to 0.7) | 16.9 (6.3 to 23.1)        | 1.2 (0.4 to 2)                     | 18.1 (6.8 to 24.6)                     | 0.6 (0.2 to 0.8)  | 15.5 (6.6 to 21.3)        | 2.2 (0.9 to 3.6)                   | 17.7 (7.4 to 24.4)                     |
| Singapore    | Low physical activity       | 0.2 (0.1 to 0.3) | 4 (1.7 to 8.2)            | 0.3 (0.1 to 0.7)                   | 4.3 (1.8 to 9)                         | 0.2 (0.1 to 0.3)  | 3.4 (1.3 to 6.8)          | 0.5 (0.2 to 1.2)                   | 3.9 (1.5 to 7.8)                       |
| Singapore    | Smoking                     | 0.4 (0.2 to 0.5) | 12 (7.6 to 17.2)          | 0.9 (0.5 to 1.4)                   | 12.9 (8.1 to 18.5)                     | 0.2 (0.2 to 0.3)  | 6.8 (4.6 to 9.6)          | 0.9 (0.5 to 1.6)                   | 7.8 (5.2 to 11)                        |
| Singapore    | Secondhand smoke            | 0.3 (0.1 to 0.4) | 8.5 (2 to 14.9)           | 0.6 (0.1 to 1.2)                   | 9.1 (2.2 to 16)                        | 0.2 (0 to 0.3)    | 5.2 (1.3 to 9.2)          | 0.7 (0.2 to 1.4)                   | 5.9 (1.5 to 10.5)                      |
| Singapore    | Metabolic risks             | 1.3 (0.3 to 2.7) | 28.7 (5.2 to 63.1)        | 2.4 (0.5 to 5.4)                   | 31.1 (5.8 to 67.9)                     | 1.3 (0.4 to 2.5)  | 26.7 (7.4 to 54.3)        | 3.9 (1.1 to 8.6)                   | 30.6 (8.7 to 62)                       |
| Singapore    | High body-mass index        | 0.2 (0 to 0.5)   | 2.2 (-4 to 9.4)           | 0.2 (-0.2 to 0.9)                  | 2.4 (-4.2 to 10.2)                     | 0.4 (0.1 to 0.9)  | 7.5 (-0.8 to 18.5)        | 1.1 (-0.1 to 2.7)                  | 8.6 (-0.9 to 21.4)                     |
| Singapore    | High fasting plasma glucose | 1.1 (0.2 to 2.4) | 27 (5.3 to 60.2)          | 2.2 (0.4 to 5.2)                   | 29.2 (5.7 to 65.2)                     | 0.9 (0.2 to 2)    | 19.9 (3.8 to 46.3)        | 3 (0.5 to 7.3)                     | 22.9 (4.4 to 53)                       |
| Slovakia     | All risk factors            | 6.2 (4.8 to 7.6) | 172 (134.7 to 209)        | 8.9 (5.8 to 12.6)                  | 180.9 (142.3 to 219.1)                 | 5.8 (3.8 to 8.4)  | 139.7 (92.9 to 203.2)     | 12.2 (7.3 to 19)                   | 151.9 (100.9 to 219.5)                 |

| Location        | Risk factor                 | 1990              |                           |                                    |                                        | 2019                |                           |                                    |                                        |
|-----------------|-----------------------------|-------------------|---------------------------|------------------------------------|----------------------------------------|---------------------|---------------------------|------------------------------------|----------------------------------------|
|                 |                             | Deaths            | YLLs (Years of Life Lost) | YLDs (Years Lived with Disability) | DALYs (Disability-Adjusted Life Years) | Deaths              | YLLs (Years of Life Lost) | YLDs (Years Lived with Disability) | DALYs (Disability-Adjusted Life Years) |
| Slovakia        | Behavioral risks            | 4.6 (3.7 to 5.4)  | 140 (113.9 to 164.6)      | 7 (4.7 to 9.9)                     | 147 (119.7 to 172.6)                   | 3.6 (2.6 to 5)      | 98.7 (69.1 to 136.9)      | 8.6 (5.2 to 13.3)                  | 107.3 (74.9 to 150.3)                  |
| Slovakia        | Alcohol use                 | 2.1 (1.7 to 2.6)  | 67.1 (52.4 to 80.9)       | 3.4 (2.2 to 4.9)                   | 70.5 (54.9 to 84.9)                    | 1.6 (1.1 to 2.3)    | 46.9 (31.8 to 66.8)       | 4.1 (2.5 to 6.3)                   | 51 (34.3 to 72.6)                      |
| Slovakia        | Diet high in red meat       | 0.8 (0.3 to 1.1)  | 24.6 (9.9 to 32.6)        | 1.3 (0.5 to 2)                     | 25.9 (10.4 to 34.3)                    | 0.8 (0.3 to 1.2)    | 20.8 (8.6 to 32.7)        | 1.8 (0.7 to 3.1)                   | 22.6 (9.3 to 35.7)                     |
| Slovakia        | Low physical activity       | 0.2 (0.1 to 0.3)  | 4.5 (2.7 to 7.8)          | 0.3 (0.1 to 0.5)                   | 4.7 (2.8 to 8.2)                       | 0.2 (0.1 to 0.4)    | 4.3 (2.1 to 7.4)          | 0.4 (0.2 to 0.7)                   | 4.6 (2.3 to 8.2)                       |
| Slovakia        | Smoking                     | 1.2 (0.9 to 1.7)  | 39.4 (26.4 to 54.2)       | 1.9 (1.1 to 3)                     | 41.4 (27.7 to 56.8)                    | 0.9 (0.6 to 1.3)    | 24.6 (15.4 to 37.8)       | 2.1 (1.2 to 3.5)                   | 26.7 (16.7 to 41.1)                    |
| Slovakia        | Secondhand smoke            | 0.6 (0.1 to 1)    | 17.8 (4.4 to 30.4)        | 0.9 (0.2 to 1.7)                   | 18.7 (4.6 to 32)                       | 0.4 (0.1 to 0.7)    | 10.7 (2.6 to 19.9)        | 0.9 (0.2 to 1.8)                   | 11.6 (2.9 to 21.5)                     |
| Slovakia        | Metabolic risks             | 2 (0.8 to 3.6)    | 41 (9.9 to 78.6)          | 2.3 (0.6 to 4.6)                   | 43.3 (10.7 to 83.1)                    | 2.6 (1 to 4.9)      | 51.2 (16.3 to 98.5)       | 4.5 (1.4 to 8.9)                   | 55.7 (17.8 to 107.2)                   |
| Slovakia        | High body-mass index        | 1.1 (0.2 to 2.2)  | 20 (-2.4 to 45.5)         | 1.2 (0 to 2.6)                     | 21.2 (-2.4 to 47.4)                    | 1.5 (0.4 to 3)      | 26.3 (4 to 59.5)          | 2.3 (0.3 to 5.2)                   | 28.6 (4.3 to 64.9)                     |
| Slovakia        | High fasting plasma glucose | 1 (0.2 to 2.3)    | 22.6 (4.2 to 52)          | 1.3 (0.2 to 3.1)                   | 23.8 (4.5 to 54.9)                     | 1.3 (0.2 to 3.1)    | 27.3 (4.8 to 66.3)        | 2.5 (0.4 to 6.4)                   | 29.8 (5.2 to 72.4)                     |
| Slovenia        | All risk factors            | 8.1 (5.8 to 11.2) | 210.8 (148.9 to 292.2)    | 13.3 (8 to 20.2)                   | 224 (159.1 to 311.2)                   | 5.3 (3.5 to 7.6)    | 119.8 (79 to 172)         | 12.4 (6.9 to 19)                   | 132.2 (87.8 to 188.9)                  |
| Slovenia        | Behavioral risks            | 6.1 (4.4 to 8.3)  | 174 (121.7 to 240)        | 11.1 (6.7 to 16.9)                 | 185 (130 to 255.5)                     | 3.4 (2.3 to 4.7)    | 86.6 (59.8 to 122.7)      | 9.3 (5.5 to 14.2)                  | 95.9 (65.8 to 135.8)                   |
| Slovenia        | Alcohol use                 | 3 (2 to 4.2)      | 84.2 (55.2 to 118.4)      | 5.4 (3.1 to 8.3)                   | 89.5 (58.9 to 125.7)                   | 1.2 (0.6 to 2)      | 31.6 (14 to 51.9)         | 3.4 (1.5 to 6)                     | 35 (15.8 to 58.5)                      |
| Slovenia        | Diet high in red meat       | 1.3 (0.6 to 1.9)  | 36.2 (16.6 to 54.9)       | 2.3 (1 to 3.8)                     | 38.5 (17.6 to 58.3)                    | 0.8 (0.4 to 1.3)    | 20.9 (9.5 to 32.8)        | 2.2 (0.9 to 3.8)                   | 23.1 (10.6 to 36.1)                    |
| Slovenia        | Low physical activity       | 0.2 (0.1 to 0.4)  | 5.1 (2.7 to 9.1)          | 0.3 (0.2 to 0.6)                   | 5.4 (2.9 to 9.7)                       | 0.2 (0.1 to 0.4)    | 3.9 (2 to 7.1)            | 0.4 (0.2 to 0.7)                   | 4.3 (2.2 to 7.9)                       |
| Slovenia        | Smoking                     | 1.7 (1.1 to 2.5)  | 49.5 (31.6 to 77)         | 3.1 (1.7 to 5.3)                   | 52.6 (33.6 to 81.8)                    | 1.1 (0.7 to 1.6)    | 29.6 (19.1 to 43.6)       | 3.2 (1.8 to 5.2)                   | 32.8 (21.1 to 48.6)                    |
| Slovenia        | Secondhand smoke            | 0.6 (0.1 to 1.1)  | 17.1 (3.9 to 31.5)        | 1.1 (0.2 to 2.1)                   | 18.2 (4.1 to 33.5)                     | 0.3 (0.1 to 0.5)    | 7.9 (1.7 to 14.4)         | 0.8 (0.2 to 1.6)                   | 8.7 (1.9 to 15.9)                      |
| Slovenia        | Metabolic risks             | 2.6 (1 to 5.1)    | 49.1 (11.2 to 101.5)      | 2.9 (0.6 to 6.1)                   | 52 (11.9 to 108.7)                     | 2.4 (0.9 to 4.5)    | 41.5 (11.9 to 81.7)       | 4 (1 to 8.1)                       | 45.5 (12.9 to 89.5)                    |
| Slovenia        | High body-mass index        | 1.3 (0.3 to 2.8)  | 20.9 (-2.9 to 51.1)       | 1.2 (-0.3 to 3)                    | 22.1 (-3.2 to 53.9)                    | 1.2 (0.3 to 2.5)    | 19 (0 to 43.1)            | 1.7 (-0.2 to 4)                    | 20.7 (-0.3 to 47.3)                    |
| Slovenia        | High fasting plasma glucose | 1.4 (0.3 to 3.4)  | 30.2 (5.4 to 73.3)        | 1.9 (0.3 to 4.7)                   | 32.1 (5.8 to 78.5)                     | 1.3 (0.2 to 2.9)    | 24.5 (4.5 to 58.2)        | 2.5 (0.5 to 6)                     | 27 (5 to 64.6)                         |
| Solomon Islands | All risk factors            | 4.2 (2 to 6.9)    | 123.3 (60.2 to 206.3)     | 3.4 (1.6 to 6.1)                   | 126.8 (61.8 to 212.2)                  | 22.3 (12.7 to 34.2) | 702.6 (401.5 to 1073)     | 20.4 (11.1 to 33.7)                | 723.1 (415 to 1110.6)                  |
| Solomon Islands | Behavioral risks            | 1.7 (0.9 to 2.7)  | 53.5 (28.5 to 84.3)       | 1.5 (0.7 to 2.5)                   | 55 (29.5 to 86.5)                      | 7.6 (4.7 to 10.9)   | 251.4 (152.9 to 369)      | 7.3 (4 to 11.7)                    | 258.7 (157.2 to 379.4)                 |
| Solomon Islands | Alcohol use                 | 0.1 (0 to 0.1)    | 2.7 (0.9 to 5.4)          | 0.1 (0 to 0.1)                     | 2.8 (0.9 to 5.5)                       | 0.6 (0.2 to 1.1)    | 23.8 (8.2 to 43.8)        | 0.7 (0.2 to 1.4)                   | 24.5 (8.4 to 45.3)                     |
| Solomon Islands | Diet high in red meat       | 0.2 (0 to 0.4)    | 8 (1.5 to 13.7)           | 0.2 (0 to 0.4)                     | 8.2 (1.6 to 14.1)                      | 1 (0.2 to 1.6)      | 36 (6.9 to 57.1)          | 1 (0.2 to 1.8)                     | 37 (7.1 to 58.6)                       |
| Solomon Islands | Low physical activity       | 0.2 (0.1 to 0.4)  | 5.3 (1.9 to 11.1)         | 0.2 (0.1 to 0.3)                   | 5.4 (2 to 11.4)                        | 0.9 (0.4 to 1.8)    | 26.2 (11 to 55)           | 0.8 (0.3 to 1.8)                   | 27 (11.2 to 56.6)                      |
| Solomon Islands | Smoking                     | 0.6 (0.3 to 1.1)  | 18.3 (8.1 to 31.4)        | 0.5 (0.2 to 0.9)                   | 18.8 (8.4 to 32.3)                     | 2.4 (1.3 to 3.6)    | 70.1 (36 to 109.2)        | 2.1 (1 to 3.5)                     | 72.2 (37.1 to 112.6)                   |
| Solomon Islands | Secondhand smoke            | 0.7 (0.1 to 1.3)  | 21.4 (4.5 to 41)          | 0.6 (0.1 to 1.1)                   | 21.9 (4.6 to 41.9)                     | 3 (0.7 to 5.4)      | 104.8 (24.3 to 191.8)     | 3 (0.7 to 5.9)                     | 107.8 (25 to 196.8)                    |
| Solomon Islands | Metabolic risks             | 2.7 (0.8 to 5.3)  | 78.4 (25.5 to 155.8)      | 2.2 (0.7 to 4.5)                   | 80.6 (26.1 to 160.1)                   | 16.5 (6.9 to 28.6)  | 502.9 (211.1 to 879)      | 14.6 (5.8 to 26.6)                 | 517.6 (217.8 to 907.1)                 |
| Solomon Islands | High body-mass index        | 1.9 (0.5 to 4.3)  | 56.1 (14.3 to 123.3)      | 1.6 (0.4 to 3.5)                   | 57.7 (14.7 to 126.6)                   | 10.7 (3.4 to 20.6)  | 317.9 (102.1 to 600.9)    | 9.2 (2.8 to 17.9)                  | 327.1 (105.4 to 620.3)                 |
| Solomon Islands | High fasting plasma glucose | 0.9 (0.1 to 2.3)  | 25.6 (4 to 66.5)          | 0.7 (0.1 to 1.9)                   | 26.3 (4.2 to 68.5)                     | 7 (1.3 to 15.9)     | 218.1 (39.9 to 502.1)     | 6.4 (1.2 to 15.7)                  | 224.4 (41.2 to 518.1)                  |
| Somalia         | All risk factors            | 1.2 (0.6 to 2)    | 30.8 (14.1 to 53.9)       | 0.7 (0.3 to 1.3)                   | 31.5 (14.5 to 55.6)                    | 1.3 (0.6 to 2.7)    | 32.9 (13.9 to 66.3)       | 0.8 (0.3 to 1.5)                   | 33.7 (14.2 to 68)                      |
| Somalia         | Behavioral risks            | 0.7 (0.4 to 1.1)  | 21.5 (10.2 to 35)         | 0.4 (0.2 to 0.8)                   | 21.9 (10.4 to 35.7)                    | 0.7 (0.3 to 1.2)    | 19.2 (8.9 to 33.6)        | 0.4 (0.2 to 0.8)                   | 19.7 (9.2 to 34.3)                     |
| Somalia         | Alcohol use                 |                   |                           |                                    |                                        |                     |                           |                                    |                                        |
| Somalia         | Diet high in red meat       | 0.4 (0.1 to 0.6)  | 11.1 (3 to 18.9)          | 0.2 (0.1 to 0.4)                   | 11.3 (3.1 to 19.1)                     | 0.3 (0.1 to 0.6)    | 9.1 (2 to 17.3)           | 0.2 (0 to 0.4)                     | 9.3 (2.1 to 17.7)                      |
| Somalia         | Low physical activity       | 0.1 (0 to 0.1)    | 1.4 (0.8 to 3.4)          | 0 (0 to 0.1)                       | 1.4 (0.8 to 3.5)                       | 0.1 (0 to 0.1)      | 1.5 (0.8 to 3.5)          | 0 (0 to 0.1)                       | 1.5 (0.8 to 3.6)                       |
| Somalia         | Smoking                     | 0.1 (0 to 0.2)    | 1.8 (0.7 to 3.5)          | 0 (0 to 0.1)                       | 1.8 (0.7 to 3.6)                       | 0.1 (0 to 0.2)      | 1.8 (0.7 to 3.7)          | 0 (0 to 0.1)                       | 1.9 (0.7 to 3.8)                       |
| Somalia         | Secondhand smoke            | 0.2 (0 to 0.5)    | 7.7 (1.5 to 14.9)         | 0.2 (0 to 0.3)                     | 7.8 (1.5 to 15.2)                      | 0.2 (0.1 to 0.5)    | 7.2 (1.6 to 14.8)         | 0.2 (0 to 0.3)                     | 7.4 (1.6 to 15.1)                      |
| Somalia         | Metabolic risks             | 0.5 (0.1 to 1.1)  | 9.9 (0.7 to 25.6)         | 0.3 (0 to 0.7)                     | 10.2 (0.8 to 26.2)                     | 0.7 (0.1 to 1.8)    | 14.4 (1.5 to 39.9)        | 0.4 (0.1 to 1)                     | 14.8 (1.5 to 40.9)                     |
| Somalia         | High body-mass index        | 0.1 (0 to 0.2)    | 0 (-3.3 to 3.1)           | 0 (0 to 0.1)                       | 0 (-3.4 to 3.2)                        | 0.1 (0 to 0.3)      | 0.2 (-3.3 to 4.3)         | 0 (0 to 0.2)                       | 0.2 (-3.4 to 4.4)                      |

| Location     | Risk factor                 | 1990              |                           |                                    |                                        | 2019             |                           |                                    |                                        |
|--------------|-----------------------------|-------------------|---------------------------|------------------------------------|----------------------------------------|------------------|---------------------------|------------------------------------|----------------------------------------|
|              |                             | Deaths            | YLLs (Years of Life Lost) | YLDs (Years Lived with Disability) | DALYs (Disability-Adjusted Life Years) | Deaths           | YLLs (Years of Life Lost) | YLDs (Years Lived with Disability) | DALYs (Disability-Adjusted Life Years) |
| Somalia      | High fasting plasma glucose | 0.4 (0.1 to 1.1)  | 10 (1.7 to 25.2)          | 0.2 (0 to 0.6)                     | 10.2 (1.7 to 25.8)                     | 0.6 (0.1 to 1.7) | 14.3 (2.3 to 39.8)        | 0.3 (0.1 to 1)                     | 14.6 (2.4 to 40.8)                     |
| South Africa | All risk factors            | 5 (3.4 to 6.9)    | 119.4 (81.5 to 161.2)     | 3.7 (2.2 to 5.4)                   | 123.1 (84.4 to 165.5)                  | 5.9 (3.8 to 8.3) | 125.8 (80.8 to 179.2)     | 4.8 (2.8 to 7.1)                   | 130.6 (83.3 to 185.6)                  |
| South Africa | Behavioral risks            | 3.4 (2.6 to 4.3)  | 99.5 (77 to 123.6)        | 2.9 (1.9 to 4.1)                   | 102.4 (79.3 to 127.3)                  | 3.1 (2.4 to 3.8) | 78.4 (60.3 to 97.3)       | 2.9 (1.9 to 4.1)                   | 81.3 (62.3 to 100.7)                   |
| South Africa | Alcohol use                 | 1.2 (0.9 to 1.6)  | 38 (28.3 to 49.2)         | 1.1 (0.7 to 1.6)                   | 39.1 (29.2 to 50.6)                    | 1.2 (0.8 to 1.5) | 31.1 (22.3 to 41.2)       | 1.1 (0.7 to 1.7)                   | 32.3 (23.1 to 42.8)                    |
| South Africa | Diet high in red meat       | 0.6 (0.2 to 0.9)  | 18.3 (7.1 to 25)          | 0.5 (0.2 to 0.8)                   | 18.8 (7.2 to 25.7)                     | 0.7 (0.3 to 1)   | 18.7 (7.7 to 26.1)        | 0.7 (0.3 to 1.1)                   | 19.4 (8 to 27)                         |
| South Africa | Low physical activity       | 0.3 (0.1 to 0.5)  | 6.9 (2.8 to 13)           | 0.2 (0.1 to 0.4)                   | 7.1 (2.8 to 13.4)                      | 0.3 (0.1 to 0.6) | 6.5 (2.8 to 12)           | 0.3 (0.1 to 0.5)                   | 6.8 (2.9 to 12.4)                      |
| South Africa | Smoking                     | 0.9 (0.6 to 1.3)  | 24.1 (15.3 to 35.2)       | 0.7 (0.4 to 1.1)                   | 24.8 (15.8 to 36.2)                    | 0.5 (0.4 to 0.8) | 13.1 (8.4 to 18.1)        | 0.5 (0.3 to 0.8)                   | 13.6 (8.8 to 18.8)                     |
| South Africa | Secondhand smoke            | 0.7 (0.2 to 1.2)  | 20.5 (4.8 to 35.5)        | 0.6 (0.1 to 1.1)                   | 21.1 (5 to 36.4)                       | 0.5 (0.1 to 0.9) | 13.9 (3.4 to 24.6)        | 0.5 (0.1 to 0.9)                   | 14.4 (3.5 to 25.4)                     |
| South Africa | Metabolic risks             | 1.9 (0.5 to 3.8)  | 25.4 (-8.2 to 66.6)       | 1 (0 to 2.3)                       | 26.4 (-8.3 to 69.2)                    | 3.3 (1.3 to 5.9) | 56.3 (12.8 to 111.9)      | 2.2 (0.6 to 4.4)                   | 58.5 (13.6 to 115.9)                   |
| South Africa | High body-mass index        | 0.8 (-0.1 to 1.9) | 2.7 (-21.5 to 26.3)       | 0.3 (-0.4 to 1)                    | 3 (-21.9 to 27.2)                      | 1.6 (0.4 to 3.1) | 20.3 (-7.4 to 51.2)       | 0.9 (-0.2 to 2)                    | 21.2 (-7.5 to 53.3)                    |
| South Africa | High fasting plasma glucose | 1.2 (0.2 to 2.7)  | 24.3 (4.6 to 56.7)        | 0.8 (0.1 to 1.9)                   | 25.1 (4.7 to 58.7)                     | 2 (0.4 to 4.3)   | 40 (7.8 to 90.8)          | 1.5 (0.3 to 3.6)                   | 41.6 (8.2 to 93.3)                     |
| South Sudan  | All risk factors            | 1.3 (0.7 to 2.1)  | 30.9 (16.3 to 50.3)       | 0.8 (0.4 to 1.3)                   | 31.7 (16.8 to 51.5)                    | 1.6 (0.8 to 2.8) | 35.4 (16.7 to 61.9)       | 0.9 (0.4 to 1.7)                   | 36.3 (17.1 to 63.5)                    |
| South Sudan  | Behavioral risks            | 0.7 (0.4 to 1)    | 19.2 (11 to 28.3)         | 0.4 (0.2 to 0.7)                   | 19.7 (11.3 to 28.9)                    | 0.7 (0.4 to 1.1) | 18.2 (9.7 to 29)          | 0.4 (0.2 to 0.7)                   | 18.6 (10 to 29.8)                      |
| South Sudan  | Alcohol use                 | 0.1 (0 to 0.2)    | 3.2 (1.4 to 6)            | 0.1 (0 to 0.1)                     | 3.3 (1.4 to 6.1)                       | 0.1 (0 to 0.2)   | 2.6 (1 to 5)              | 0.1 (0 to 0.1)                     | 2.7 (1.1 to 5.2)                       |
| South Sudan  | Diet high in red meat       | 0.2 (0 to 0.3)    | 6 (1.2 to 10)             | 0.1 (0 to 0.2)                     | 6.1 (1.2 to 10.2)                      | 0.2 (0 to 0.4)   | 6 (1.1 to 10.3)           | 0.1 (0 to 0.3)                     | 6.1 (1.1 to 10.5)                      |
| South Sudan  | Low physical activity       | 0.1 (0 to 0.1)    | 1.5 (0.8 to 3.5)          | 0 (0 to 0.1)                       | 1.5 (0.9 to 3.5)                       | 0.1 (0 to 0.2)   | 1.5 (0.8 to 3.6)          | 0 (0 to 0.1)                       | 1.6 (0.9 to 3.6)                       |
| South Sudan  | Smoking                     | 0.1 (0 to 0.2)    | 1.9 (0.8 to 3.5)          | 0 (0 to 0.1)                       | 2 (0.8 to 3.6)                         | 0.1 (0 to 0.2)   | 1.8 (0.7 to 3.2)          | 0 (0 to 0.1)                       | 1.9 (0.7 to 3.3)                       |
| South Sudan  | Secondhand smoke            | 0.2 (0.1 to 0.4)  | 7 (1.6 to 13)             | 0.1 (0 to 0.3)                     | 7.1 (1.6 to 13.3)                      | 0.2 (0.1 to 0.5) | 6.6 (1.5 to 13.2)         | 0.2 (0 to 0.3)                     | 6.8 (1.5 to 13.5)                      |
| South Sudan  | Metabolic risks             | 0.7 (0.2 to 1.4)  | 12.4 (0.9 to 29.2)        | 0.3 (0.1 to 0.8)                   | 12.7 (1 to 30.1)                       | 1 (0.3 to 2.1)   | 18.1 (1.6 to 40.8)        | 0.5 (0.1 to 1.2)                   | 18.7 (1.8 to 41.8)                     |
| South Sudan  | High body-mass index        | 0.2 (0 to 0.6)    | 2.7 (-4 to 10)            | 0.1 (0 to 0.3)                     | 2.8 (-4 to 10.4)                       | 0.4 (0 to 1)     | 5.4 (-3.8 to 17.2)        | 0.2 (0 to 0.5)                     | 5.6 (-3.8 to 17.7)                     |
| South Sudan  | High fasting plasma glucose | 0.5 (0.1 to 1.1)  | 10 (1.8 to 24.2)          | 0.3 (0 to 0.6)                     | 10.2 (1.8 to 24.9)                     | 0.6 (0.1 to 1.5) | 13.3 (2.3 to 33.1)        | 0.4 (0.1 to 0.9)                   | 13.7 (2.4 to 33.9)                     |
| Spain        | All risk factors            | 7.2 (5.6 to 9)    | 200.4 (160.2 to 242.6)    | 15.1 (9.8 to 21.7)                 | 215.6 (171.9 to 261.1)                 | 4.9 (3.6 to 6.4) | 123.1 (94.7 to 154.9)     | 16.9 (10.5 to 25.6)                | 140.1 (107 to 177.3)                   |
| Spain        | Behavioral risks            | 5.3 (4.5 to 6.2)  | 167 (141.6 to 192.6)      | 12.1 (8 to 17.1)                   | 179.1 (151.6 to 207.3)                 | 3.3 (2.8 to 3.9) | 96 (80.8 to 112.7)        | 13 (8.1 to 19.9)                   | 109 (90.6 to 129)                      |
| Spain        | Alcohol use                 | 2.5 (2 to 3.1)    | 80.6 (64.6 to 97.6)       | 5.8 (3.8 to 8.6)                   | 86.4 (69 to 104.9)                     | 1.4 (1 to 1.7)   | 40.3 (31.3 to 50.7)       | 5.4 (3.2 to 8.6)                   | 45.7 (35 to 57.6)                      |
| Spain        | Diet high in red meat       | 1.2 (0.6 to 1.6)  | 36.4 (18.4 to 48.8)       | 2.7 (1.2 to 4.3)                   | 39.1 (19.8 to 52.8)                    | 0.8 (0.4 to 1)   | 20.5 (10.4 to 28.2)       | 2.8 (1.2 to 4.7)                   | 23.3 (11.8 to 32.3)                    |
| Spain        | Low physical activity       | 0.3 (0.1 to 0.6)  | 6.8 (2.6 to 14.2)         | 0.6 (0.2 to 1.2)                   | 7.4 (2.9 to 15.4)                      | 0.2 (0.1 to 0.4) | 4.8 (1.7 to 9.6)          | 0.7 (0.2 to 1.5)                   | 5.4 (1.9 to 11.1)                      |
| Spain        | Smoking                     | 1.3 (0.9 to 1.7)  | 44 (30.5 to 58.9)         | 3.1 (1.8 to 4.6)                   | 47.1 (32.5 to 62.8)                    | 1 (0.8 to 1.3)   | 32.8 (23.5 to 43.1)       | 4.4 (2.5 to 7.1)                   | 37.2 (26.6 to 48.8)                    |
| Spain        | Secondhand smoke            | 0.5 (0.1 to 0.9)  | 17 (4.3 to 29)            | 1.2 (0.3 to 2.2)                   | 18.2 (4.6 to 31.4)                     | 0.3 (0.1 to 0.5) | 7.9 (1.8 to 14)           | 1.1 (0.2 to 2.1)                   | 9 (2.1 to 15.9)                        |
| Spain        | Metabolic risks             | 2.3 (0.8 to 4.3)  | 41.8 (8.1 to 85.3)        | 3.7 (0.9 to 7.7)                   | 45.5 (9.3 to 92.7)                     | 2 (0.7 to 3.7)   | 34.9 (8.4 to 70.9)        | 5 (1.3 to 10.6)                    | 40 (9.4 to 80.5)                       |
| Spain        | High body-mass index        | 0.9 (0.1 to 1.9)  | 12 (-8.2 to 34.2)         | 1.2 (-0.4 to 3)                    | 13.2 (-8.3 to 37.5)                    | 0.8 (0.2 to 1.7) | 11.2 (-3.7 to 28.6)       | 1.6 (-0.4 to 4.2)                  | 12.8 (-3.8 to 32.5)                    |
| Spain        | High fasting plasma glucose | 1.5 (0.3 to 3.4)  | 31.8 (6.2 to 71.6)        | 2.7 (0.5 to 6.5)                   | 34.5 (6.7 to 77.8)                     | 1.3 (0.3 to 2.9) | 25.5 (4.8 to 57.5)        | 3.7 (0.7 to 9.3)                   | 29.2 (5.5 to 66.2)                     |
| Sri Lanka    | All risk factors            | 1.9 (1 to 2.9)    | 47.2 (26.1 to 72.8)       | 1.7 (0.8 to 2.9)                   | 48.9 (27.1 to 75.5)                    | 3.9 (2 to 6.4)   | 90 (45.8 to 148.8)        | 5.2 (2.5 to 8.9)                   | 95.2 (49 to 156.9)                     |
| Sri Lanka    | Behavioral risks            | 0.6 (0.3 to 0.8)  | 16.2 (8.7 to 23.8)        | 0.6 (0.3 to 0.9)                   | 16.8 (9 to 24.8)                       | 0.8 (0.5 to 1.2) | 21.4 (11.9 to 32.9)       | 1.3 (0.6 to 2.1)                   | 22.7 (12.7 to 34.9)                    |
| Sri Lanka    | Alcohol use                 | 0.1 (0 to 0.1)    | 2.3 (1.4 to 3.3)          | 0.1 (0 to 0.1)                     | 2.4 (1.5 to 3.4)                       | 0.2 (0.1 to 0.3) | 6.4 (4 to 9.6)            | 0.4 (0.2 to 0.6)                   | 6.7 (4.3 to 10.1)                      |
| Sri Lanka    | Diet high in red meat       | 0 (0 to 0.1)      | 1.4 (0.6 to 1.9)          | 0 (0 to 0.1)                       | 1.4 (0.6 to 1.9)                       | 0.1 (0 to 0.1)   | 1.7 (0.7 to 2.7)          | 0.1 (0 to 0.2)                     | 1.8 (0.7 to 2.8)                       |
| Sri Lanka    | Low physical activity       | 0.1 (0 to 0.1)    | 1.3 (0.8 to 2.7)          | 0 (0 to 0.1)                       | 1.3 (0.8 to 2.8)                       | 0.1 (0 to 0.1)   | 1.6 (0.9 to 3.3)          | 0.1 (0 to 0.2)                     | 1.7 (1 to 3.6)                         |
| Sri Lanka    | Smoking                     | 0.1 (0.1 to 0.1)  | 2 (1.1 to 3.1)            | 0.1 (0 to 0.1)                     | 2 (1.2 to 3.2)                         | 0.1 (0 to 0.1)   | 1.6 (0.9 to 2.7)          | 0.1 (0 to 0.2)                     | 1.7 (1 to 2.8)                         |
| Sri Lanka    | Secondhand smoke            | 0.3 (0.1 to 0.5)  | 9.6 (2.3 to 17.1)         | 0.3 (0.1 to 0.6)                   | 10 (2.4 to 17.7)                       | 0.4 (0.1 to 0.7) | 10.6 (2.6 to 20.6)        | 0.6 (0.1 to 1.2)                   | 11.2 (2.8 to 21.8)                     |
| Sri Lanka    | Metabolic risks             | 1.4 (0.5 to 2.5)  | 33 (12.8 to 58.6)         | 1.2 (0.5 to 2.3)                   | 34.2 (13.4 to 60.6)                    | 3.3 (1.4 to 5.8) | 73.4 (30.5 to 131.7)      | 4.3 (1.7 to 7.7)                   | 77.7 (32.8 to 138.1)                   |
| Sri Lanka    | High body-mass index        | 0.8 (0.2 to 1.7)  | 21.2 (6 to 43.4)          | 0.8 (0.2 to 1.6)                   | 22 (6.2 to 45)                         | 2 (0.6 to 3.9)   | 45.6 (13.6 to 90.5)       | 2.6 (0.7 to 5.4)                   | 48.2 (14.5 to 95.4)                    |

| Location    | Risk factor                 | 1990                |                           |                                    |                                        | 2019              |                           |                                    |                                        |
|-------------|-----------------------------|---------------------|---------------------------|------------------------------------|----------------------------------------|-------------------|---------------------------|------------------------------------|----------------------------------------|
|             |                             | Deaths              | YLLs (Years of Life Lost) | YLDs (Years Lived with Disability) | DALYs (Disability-Adjusted Life Years) | Deaths            | YLLs (Years of Life Lost) | YLDs (Years Lived with Disability) | DALYs (Disability-Adjusted Life Years) |
| Sri Lanka   | High fasting plasma glucose | 0.6 (0.1 to 1.4)    | 13.1 (2.5 to 30)          | 0.5 (0.1 to 1.3)                   | 13.6 (2.6 to 31.3)                     | 1.6 (0.3 to 3.7)  | 34 (6.8 to 80.2)          | 2 (0.4 to 4.8)                     | 36 (7.2 to 85)                         |
| Sudan       | All risk factors            | 1.3 (0.7 to 2.5)    | 36.8 (18 to 67)           | 1.1 (0.5 to 2)                     | 37.9 (18.7 to 69)                      | 2.5 (1.2 to 4.4)  | 62.2 (28.4 to 111)        | 2.4 (1 to 4.4)                     | 64.6 (29.7 to 115.3)                   |
| Sudan       | Behavioral risks            | 0.8 (0.5 to 1.3)    | 25.2 (14.7 to 40.5)       | 0.7 (0.4 to 1.2)                   | 25.9 (15 to 41.6)                      | 1 (0.6 to 1.6)    | 31.5 (17.3 to 49.2)       | 1.2 (0.6 to 1.9)                   | 32.7 (18.1 to 51.3)                    |
| Sudan       | Alcohol use                 | 0 (0 to 0.1)        | 1.6 (0.8 to 2.9)          | 0 (0 to 0.1)                       | 1.7 (0.8 to 2.9)                       | 0 (0 to 0)        | 0.1 (0 to 0.3)            | 0 (0 to 0)                         | 0.1 (0 to 0.3)                         |
| Sudan       | Diet high in red meat       | 0.2 (0 to 0.3)      | 5.4 (1.1 to 9.3)          | 0.1 (0 to 0.3)                     | 5.5 (1.1 to 9.6)                       | 0.2 (0 to 0.4)    | 7 (1.4 to 12.1)           | 0.3 (0.1 to 0.5)                   | 7.3 (1.4 to 12.6)                      |
| Sudan       | Low physical activity       | 0.3 (0.1 to 0.6)    | 10.4 (3.3 to 19.3)        | 0.3 (0.1 to 0.6)                   | 10.7 (3.4 to 19.8)                     | 0.5 (0.2 to 0.9)  | 14.3 (4.9 to 26.2)        | 0.5 (0.2 to 1)                     | 14.9 (5.1 to 27.1)                     |
| Sudan       | Smoking                     | 0.1 (0 to 0.1)      | 2 (1.1 to 3.5)            | 0.1 (0 to 0.1)                     | 2.1 (1.1 to 3.6)                       | 0.1 (0.1 to 0.1)  | 2.5 (1.4 to 4)            | 0.1 (0 to 0.2)                     | 2.6 (1.5 to 4.2)                       |
| Sudan       | Secondhand smoke            | 0.2 (0 to 0.4)      | 6.4 (1.5 to 12.6)         | 0.2 (0 to 0.3)                     | 6.6 (1.5 to 13)                        | 0.3 (0.1 to 0.5)  | 8.4 (2.1 to 16.7)         | 0.3 (0.1 to 0.6)                   | 8.7 (2.2 to 17.4)                      |
| Sudan       | Metabolic risks             | 0.6 (0.1 to 1.5)    | 12.7 (-1.3 to 35.1)       | 0.4 (0 to 1.1)                     | 13.2 (-1.2 to 36.2)                    | 1.6 (0.5 to 3.4)  | 33.5 (1.7 to 78.9)        | 1.3 (0.1 to 3.1)                   | 34.8 (1.9 to 82.2)                     |
| Sudan       | High body-mass index        | 0.1 (-0.1 to 0.5)   | 0.4 (-7.8 to 8.1)         | 0.1 (-0.1 to 0.3)                  | 0.5 (-7.9 to 8.3)                      | 0.5 (-0.1 to 1.1) | 3.8 (-13.6 to 19.1)       | 0.1 (-0.5 to 0.8)                  | 3.9 (-14.4 to 19.8)                    |
| Sudan       | High fasting plasma glucose | 0.5 (0.1 to 1.3)    | 12.6 (2.1 to 34.2)        | 0.4 (0.1 to 1)                     | 13 (2.2 to 35.2)                       | 1.2 (0.2 to 2.9)  | 31.4 (6 to 77)            | 1.2 (0.2 to 3)                     | 32.6 (6.2 to 79.8)                     |
| Suriname    | All risk factors            | 3.6 (2.4 to 5.2)    | 92 (61 to 131.7)          | 3.3 (2 to 5.3)                     | 95.4 (63.2 to 136.2)                   | 5.1 (3 to 8.1)    | 124.3 (73.1 to 198.3)     | 5.5 (3 to 9.4)                     | 129.8 (76.6 to 206.5)                  |
| Suriname    | Behavioral risks            | 2.1 (1.5 to 2.6)    | 61.4 (45.4 to 78.1)       | 2.1 (1.3 to 3)                     | 63.5 (47.2 to 80.8)                    | 2.4 (1.7 to 3.2)  | 70.8 (50.6 to 93.5)       | 3 (1.8 to 4.3)                     | 73.8 (52.6 to 97.2)                    |
| Suriname    | Alcohol use                 | 0.8 (0.6 to 1.1)    | 27.7 (20.4 to 36.6)       | 0.9 (0.6 to 1.3)                   | 28.6 (21 to 37.8)                      | 0.9 (0.6 to 1.2)  | 30.9 (21.1 to 42)         | 1.2 (0.8 to 1.9)                   | 32.2 (21.9 to 43.8)                    |
| Suriname    | Diet high in red meat       | 0.2 (0 to 0.3)      | 6 (1.2 to 8.6)            | 0.2 (0 to 0.3)                     | 6.2 (1.2 to 8.9)                       | 0.2 (0 to 0.4)    | 7.1 (1.4 to 11)           | 0.3 (0.1 to 0.5)                   | 7.4 (1.5 to 11.4)                      |
| Suriname    | Low physical activity       | 0.3 (0.1 to 0.5)    | 6 (2.2 to 12)             | 0.2 (0.1 to 0.5)                   | 6.2 (2.2 to 12.5)                      | 0.4 (0.1 to 0.7)  | 8.2 (2.6 to 15.9)         | 0.4 (0.1 to 0.8)                   | 8.6 (2.7 to 16.6)                      |
| Suriname    | Smoking                     | 0.5 (0.3 to 0.7)    | 12.2 (7.5 to 18.2)        | 0.4 (0.2 to 0.7)                   | 12.7 (7.8 to 18.8)                     | 0.5 (0.3 to 0.8)  | 13.4 (8.4 to 20.5)        | 0.6 (0.3 to 1)                     | 14 (8.7 to 21.4)                       |
| Suriname    | Secondhand smoke            | 0.4 (0.1 to 0.7)    | 12.6 (3 to 22.6)          | 0.4 (0.1 to 0.8)                   | 13 (3.1 to 23.4)                       | 0.5 (0.1 to 0.9)  | 14.8 (3.6 to 27.1)        | 0.6 (0.1 to 1.1)                   | 15.4 (3.7 to 28.3)                     |
| Suriname    | Metabolic risks             | 1.8 (0.6 to 3.4)    | 35.1 (6.3 to 75.1)        | 1.4 (0.4 to 3.1)                   | 36.5 (6.8 to 77.9)                     | 3.1 (1 to 6.1)    | 61.5 (12.5 to 135)        | 2.9 (0.7 to 6.4)                   | 64.4 (13.4 to 140.9)                   |
| Suriname    | High body-mass index        | 0.5 (0 to 1.2)      | 5.8 (-6.4 to 20.3)        | 0.3 (-0.1 to 0.9)                  | 6.1 (-6.6 to 21.2)                     | 0.8 (0 to 1.8)    | 8 (-13.7 to 30.1)         | 0.5 (-0.4 to 1.6)                  | 8.6 (-14 to 31.8)                      |
| Suriname    | High fasting plasma glucose | 1.3 (0.3 to 2.9)    | 30.6 (5.8 to 67.9)        | 1.2 (0.2 to 2.8)                   | 31.7 (6 to 70.6)                       | 2.4 (0.5 to 5.3)  | 56.6 (11.5 to 127.4)      | 2.5 (0.5 to 6)                     | 59.2 (12 to 132.2)                     |
| Sweden      | All risk factors            | 7.3 (6 to 8.6)      | 193.5 (163 to 225.4)      | 19.3 (12.8 to 27.1)                | 212.8 (178.6 to 248.3)                 | 6.3 (5 to 7.8)    | 143.5 (115.4 to 174.6)    | 21.7 (13.7 to 32)                  | 165.3 (132.6 to 201.5)                 |
| Sweden      | Behavioral risks            | 6.1 (5.2 to 6.9)    | 171.1 (148.3 to 194.4)    | 16.7 (11.3 to 23.5)                | 187.8 (161.9 to 213.8)                 | 4.8 (4 to 5.5)    | 117.3 (99.4 to 135)       | 17.5 (11.1 to 25.4)                | 134.8 (112.4 to 155.6)                 |
| Sweden      | Alcohol use                 | 3.4 (2.8 to 4.1)    | 95.5 (78.6 to 113.3)      | 9.4 (6.1 to 13.5)                  | 104.9 (86.2 to 124.2)                  | 2.8 (2.2 to 3.4)  | 69.7 (56.3 to 83.7)       | 10.4 (6.4 to 15.4)                 | 80.1 (64 to 96.5)                      |
| Sweden      | Diet high in red meat       | 1 (0.5 to 1.3)      | 28.7 (14 to 38)           | 2.8 (1.2 to 4.4)                   | 31.4 (15.2 to 42)                      | 0.9 (0.4 to 1.2)  | 21.5 (10.8 to 29.4)       | 3.2 (1.4 to 5.3)                   | 24.7 (12.3 to 34.2)                    |
| Sweden      | Low physical activity       | 0.3 (0.1 to 0.5)    | 6 (2.3 to 12.4)           | 0.6 (0.2 to 1.4)                   | 6.6 (2.6 to 13.8)                      | 0.2 (0.1 to 0.5)  | 4.6 (1.7 to 9.6)          | 0.7 (0.2 to 1.6)                   | 5.4 (2 to 11.1)                        |
| Sweden      | Smoking                     | 1.8 (1.3 to 2.3)    | 51.7 (37.3 to 67)         | 5.1 (3 to 7.7)                     | 56.8 (40.8 to 74)                      | 1.2 (0.9 to 1.6)  | 29.2 (21.4 to 37.7)       | 4.5 (2.6 to 7.1)                   | 33.7 (24.5 to 44)                      |
| Sweden      | Secondhand smoke            | 0.2 (0.1 to 0.4)    | 8.3 (1.9 to 14.6)         | 0.8 (0.2 to 1.4)                   | 9 (2.1 to 16)                          | 0.1 (0 to 0.2)    | 4.2 (1 to 7.3)            | 0.6 (0.1 to 1.2)                   | 4.8 (1.1 to 8.5)                       |
| Sweden      | Metabolic risks             | 1.7 (0.6 to 3.3)    | 31.9 (6.8 to 64.7)        | 3.6 (1 to 7.3)                     | 35.5 (7.8 to 71.5)                     | 2.1 (0.8 to 3.9)  | 37.3 (11 to 73.9)         | 5.9 (1.7 to 12)                    | 43.3 (13 to 84.8)                      |
| Sweden      | High body-mass index        | 0.8 (0.2 to 1.7)    | 12 (-3.1 to 30.7)         | 1.5 (-0.1 to 3.5)                  | 13.4 (-3.1 to 34)                      | 1 (0.3 to 2)      | 14.5 (-0.5 to 33.3)       | 2.4 (0.1 to 5.4)                   | 16.9 (-0.4 to 38.1)                    |
| Sweden      | High fasting plasma glucose | 1 (0.2 to 2.2)      | 20.9 (3.9 to 48.2)        | 2.2 (0.4 to 5.4)                   | 23.1 (4.3 to 53)                       | 1.3 (0.2 to 2.9)  | 24.4 (4.6 to 56.4)        | 3.8 (0.6 to 9.1)                   | 28.2 (5.4 to 64.3)                     |
| Switzerland | All risk factors            | 12.3 (10.2 to 14.7) | 316 (264.8 to 369.8)      | 25.7 (17.1 to 35.5)                | 341.7 (286.2 to 400.1)                 | 6.6 (5.3 to 8.3)  | 150.8 (122.8 to 184.6)    | 21.3 (13.5 to 31.7)                | 172.1 (139 to 210.7)                   |
| Switzerland | Behavioral risks            | 10.1 (8.7 to 11.6)  | 275.8 (237.7 to 315.6)    | 22.3 (15 to 30.8)                  | 298.1 (256.3 to 341)                   | 5.1 (4.2 to 6)    | 123.6 (104.5 to 143.9)    | 17.3 (11 to 25.8)                  | 140.9 (117.8 to 165)                   |
| Switzerland | Alcohol use                 | 6.1 (5 to 7.4)      | 166 (136.7 to 199.2)      | 13.5 (8.7 to 19)                   | 179.4 (147.1 to 214.7)                 | 3 (2.3 to 3.6)    | 72.7 (58.2 to 88.9)       | 10.2 (6.2 to 15.4)                 | 82.9 (66.1 to 102.4)                   |
| Switzerland | Diet high in red meat       | 2 (1 to 2.7)        | 53 (26.1 to 72.7)         | 4.3 (2 to 7)                       | 57.3 (28.2 to 78.5)                    | 1 (0.5 to 1.3)    | 24 (11.9 to 32.9)         | 3.4 (1.4 to 5.6)                   | 27.4 (13.8 to 37.8)                    |
| Switzerland | Low physical activity       | 0.6 (0.2 to 1)      | 12.3 (4.1 to 24.2)        | 1 (0.4 to 2.3)                     | 13.3 (4.5 to 26.2)                     | 0.3 (0.1 to 0.6)  | 6.6 (2.2 to 12.5)         | 1 (0.3 to 2)                       | 7.6 (2.5 to 14.4)                      |
| Switzerland | Smoking                     | 2 (1.4 to 2.6)      | 58.3 (41 to 77)           | 4.6 (2.8 to 6.9)                   | 62.9 (44.2 to 82.9)                    | 1.1 (0.8 to 1.4)  | 27.4 (19.8 to 35.1)       | 3.8 (2.2 to 6.1)                   | 31.2 (22.5 to 40.1)                    |

| Location                   | Risk factor                 | 1990              |                           |                                    |                                        | 2019             |                           |                                    |                                        |
|----------------------------|-----------------------------|-------------------|---------------------------|------------------------------------|----------------------------------------|------------------|---------------------------|------------------------------------|----------------------------------------|
|                            |                             | Deaths            | YLLs (Years of Life Lost) | YLDs (Years Lived with Disability) | DALYs (Disability-Adjusted Life Years) | Deaths           | YLLs (Years of Life Lost) | YLDs (Years Lived with Disability) | DALYs (Disability-Adjusted Life Years) |
| Switzerland                | Secondhand smoke            | 0.6 (0.2 to 1.1)  | 19.1 (4.7 to 32.7)        | 1.5 (0.3 to 2.8)                   | 20.6 (5 to 35)                         | 0.2 (0.1 to 0.4) | 6.9 (1.7 to 12)           | 0.9 (0.2 to 1.8)                   | 7.8 (1.9 to 13.8)                      |
| Switzerland                | Metabolic risks             | 3.1 (1.2 to 5.8)  | 57.6 (16.2 to 114.8)      | 4.8 (1.3 to 9.9)                   | 62.4 (18 to 123.6)                     | 2.2 (0.8 to 4)   | 38.6 (12.8 to 74.4)       | 5.6 (1.7 to 11.7)                  | 44.3 (14.3 to 85.2)                    |
| Switzerland                | High body-mass index        | 1.4 (0.3 to 2.8)  | 22.1 (-0.3 to 50.6)       | 1.7 (-0.1 to 4.2)                  | 23.8 (-0.4 to 55)                      | 0.9 (0.3 to 1.8) | 14.5 (1.6 to 31.9)        | 2.1 (0.3 to 4.7)                   | 16.6 (1.9 to 36.8)                     |
| Switzerland                | High fasting plasma glucose | 1.9 (0.4 to 4.2)  | 37.5 (7.1 to 86.9)        | 3.2 (0.6 to 7.9)                   | 40.7 (7.7 to 94)                       | 1.3 (0.3 to 3)   | 25.7 (4.9 to 57.9)        | 3.8 (0.7 to 9.6)                   | 29.4 (5.6 to 67.7)                     |
| Syrian Arab Republic       | All risk factors            | 1.4 (0.7 to 2.3)  | 34.3 (16.7 to 57.4)       | 1.4 (0.7 to 2.5)                   | 35.8 (17.7 to 59.4)                    | 2.4 (1.3 to 4.1) | 52.8 (26.3 to 92.9)       | 3 (1.4 to 5.4)                     | 55.8 (27.7 to 97.7)                    |
| Syrian Arab Republic       | Behavioral risks            | 0.8 (0.5 to 1.1)  | 23.5 (13.7 to 34.7)       | 0.9 (0.5 to 1.4)                   | 24.4 (14.2 to 36.1)                    | 1 (0.6 to 1.4)   | 26.4 (14.7 to 40.7)       | 1.5 (0.8 to 2.5)                   | 27.9 (15.5 to 43.1)                    |
| Syrian Arab Republic       | Alcohol use                 | 0 (0 to 0)        | 0.9 (0.6 to 1.4)          | 0 (0 to 0.1)                       | 1 (0.6 to 1.5)                         | 0 (0 to 0)       | 0.7 (0.4 to 1.1)          | 0 (0 to 0.1)                       | 0.7 (0.4 to 1.2)                       |
| Syrian Arab Republic       | Diet high in red meat       | 0.2 (0 to 0.3)    | 5.9 (1.3 to 9.3)          | 0.2 (0 to 0.4)                     | 6.1 (1.3 to 9.7)                       | 0.2 (0 to 0.4)   | 6.3 (1.3 to 10.8)         | 0.4 (0.1 to 0.6)                   | 6.7 (1.3 to 11.3)                      |
| Syrian Arab Republic       | Low physical activity       | 0.2 (0.1 to 0.3)  | 4 (1.5 to 7.6)            | 0.2 (0.1 to 0.3)                   | 4.2 (1.6 to 8)                         | 0.3 (0.1 to 0.5) | 5.7 (2.1 to 11.1)         | 0.3 (0.1 to 0.7)                   | 6.1 (2.2 to 11.8)                      |
| Syrian Arab Republic       | Smoking                     | 0.2 (0.1 to 0.2)  | 4.4 (2.1 to 7.2)          | 0.2 (0.1 to 0.3)                   | 4.5 (2.2 to 7.5)                       | 0.2 (0.1 to 0.2) | 4.1 (2.2 to 6.7)          | 0.2 (0.1 to 0.4)                   | 4.4 (2.4 to 7.1)                       |
| Syrian Arab Republic       | Secondhand smoke            | 0.3 (0.1 to 0.5)  | 9.2 (2.2 to 17.4)         | 0.3 (0.1 to 0.6)                   | 9.5 (2.3 to 18.1)                      | 0.3 (0.1 to 0.6) | 10.4 (2 to 19.8)          | 0.6 (0.1 to 1.1)                   | 11 (2.1 to 20.9)                       |
| Syrian Arab Republic       | Metabolic risks             | 0.7 (0.1 to 1.6)  | 12.1 (-3.2 to 32.8)       | 0.6 (0 to 1.4)                     | 12.8 (-3.1 to 34.1)                    | 1.6 (0.5 to 3.2) | 29.1 (3.1 to 67.4)        | 1.7 (0.2 to 3.9)                   | 30.7 (3.3 to 71.3)                     |
| Syrian Arab Republic       | High body-mass index        | 0.2 (-0.1 to 0.6) | 0.4 (-9.6 to 10.4)        | 0.1 (-0.2 to 0.5)                  | 0.5 (-9.8 to 10.8)                     | 0.6 (0 to 1.2)   | 5.8 (-8 to 20.3)          | 0.3 (-0.5 to 1.2)                  | 6.1 (-8.5 to 21.4)                     |
| Syrian Arab Republic       | High fasting plasma glucose | 0.5 (0.1 to 1.2)  | 12.3 (2.1 to 29.5)        | 0.5 (0.1 to 1.3)                   | 12.8 (2.2 to 30.7)                     | 1.1 (0.2 to 2.7) | 25 (5 to 61.6)            | 1.5 (0.3 to 3.6)                   | 26.5 (5.3 to 64.4)                     |
| Taiwan (Province of China) | All risk factors            | 2.3 (1.5 to 3.2)  | 66.5 (44.1 to 90.7)       | 3.7 (2.2 to 5.6)                   | 70.1 (46.6 to 95.8)                    | 3.4 (1.9 to 5.1) | 93.5 (55.1 to 141)        | 9.2 (4.9 to 14.7)                  | 102.8 (61.1 to 155.7)                  |
| Taiwan (Province of China) | Behavioral risks            | 1.1 (0.8 to 1.4)  | 36.3 (25.5 to 46.4)       | 2 (1.2 to 2.9)                     | 38.3 (26.7 to 49)                      | 1.3 (0.9 to 1.9) | 41.9 (26.7 to 60.7)       | 4.2 (2.3 to 6.6)                   | 46.1 (29.3 to 66.7)                    |
| Taiwan (Province of China) | Alcohol use                 | 0.2 (0.2 to 0.3)  | 8.2 (6.2 to 10.6)         | 0.4 (0.3 to 0.7)                   | 8.6 (6.5 to 11.2)                      | 0.2 (0.1 to 0.3) | 6.5 (4.1 to 9.5)          | 0.6 (0.4 to 1)                     | 7.1 (4.5 to 10.5)                      |
| Taiwan (Province of China) | Diet high in red meat       | 0.4 (0.1 to 0.5)  | 11.9 (4.8 to 15.7)        | 0.7 (0.2 to 1)                     | 12.6 (5 to 16.5)                       | 0.6 (0.3 to 1)   | 19.4 (8.9 to 30)          | 2 (0.8 to 3.2)                     | 21.4 (9.8 to 33.1)                     |
| Taiwan (Province of China) | Low physical activity       | 0.1 (0 to 0.1)    | 1.8 (1 to 3.4)            | 0.1 (0.1 to 0.2)                   | 1.9 (1.1 to 3.6)                       | 0.1 (0 to 0.2)   | 2.5 (1.2 to 5)            | 0.3 (0.1 to 0.5)                   | 2.8 (1.4 to 5.5)                       |
| Taiwan (Province of China) | Smoking                     | 0.1 (0.1 to 0.2)  | 3.9 (2.3 to 6)            | 0.2 (0.1 to 0.4)                   | 4.1 (2.5 to 6.4)                       | 0.1 (0.1 to 0.2) | 3.8 (2 to 6.2)            | 0.4 (0.2 to 0.7)                   | 4.2 (2.2 to 6.7)                       |
| Taiwan (Province of China) | Secondhand smoke            | 0.4 (0.1 to 0.6)  | 12.4 (3.1 to 21.3)        | 0.7 (0.1 to 1.2)                   | 13.1 (3.3 to 22.4)                     | 0.4 (0.1 to 0.6) | 11.5 (2.5 to 21.1)        | 1.2 (0.2 to 2.2)                   | 12.7 (2.8 to 23.5)                     |
| Taiwan (Province of China) | Metabolic risks             | 1.3 (0.5 to 2.3)  | 34.4 (13.8 to 60.8)       | 1.9 (0.7 to 3.5)                   | 36.3 (14.7 to 64)                      | 2.3 (0.9 to 4.1) | 58.5 (23.3 to 104.7)      | 5.7 (2.1 to 10.4)                  | 64.2 (25.7 to 114.9)                   |
| Taiwan (Province of China) | High body-mass index        | 0.9 (0.3 to 1.9)  | 23.9 (7.1 to 47.7)        | 1.3 (0.4 to 2.8)                   | 25.3 (7.4 to 50.1)                     | 1.6 (0.5 to 3.2) | 43.2 (13.1 to 82.4)       | 4.1 (1.2 to 8.4)                   | 47.3 (14.3 to 90.4)                    |
| Taiwan (Province of China) | High fasting plasma glucose | 0.5 (0.1 to 1.1)  | 12 (2.3 to 27.3)          | 0.7 (0.1 to 1.7)                   | 12.7 (2.4 to 28.8)                     | 0.8 (0.1 to 1.8) | 18.4 (3.4 to 44.1)        | 1.8 (0.3 to 4.7)                   | 20.3 (3.8 to 48.6)                     |
| Tajikistan                 | All risk factors            | 1.9 (1.3 to 2.8)  | 58.7 (37.8 to 82.8)       | 2 (1.1 to 3)                       | 60.7 (39.2 to 85.6)                    | 2.4 (1.3 to 3.9) | 60.8 (31.8 to 100.7)      | 2.4 (1.2 to 4.2)                   | 63.2 (33.1 to 104.2)                   |
| Tajikistan                 | Behavioral risks            | 1.3 (0.9 to 1.7)  | 44.4 (30.7 to 58.1)       | 1.4 (0.8 to 2.1)                   | 45.8 (31.6 to 60)                      | 1 (0.6 to 1.3)   | 30 (19.1 to 41.4)         | 1.1 (0.6 to 1.7)                   | 31.2 (19.7 to 43)                      |
| Tajikistan                 | Alcohol use                 | 0.5 (0.3 to 0.6)  | 18 (12.3 to 24.5)         | 0.5 (0.3 to 0.9)                   | 18.6 (12.6 to 25.3)                    | 0.3 (0.2 to 0.4) | 9.6 (5.9 to 14.4)         | 0.3 (0.2 to 0.6)                   | 10 (6.1 to 14.9)                       |
| Tajikistan                 | Diet high in red meat       | 0.3 (0.1 to 0.4)  | 9.9 (2 to 13.9)           | 0.3 (0.1 to 0.5)                   | 10.2 (2.1 to 14.4)                     | 0.3 (0 to 0.4)   | 7.7 (1.5 to 12)           | 0.3 (0.1 to 0.5)                   | 8 (1.5 to 12.4)                        |
| Tajikistan                 | Low physical activity       | 0.1 (0.1 to 0.2)  | 2.3 (1.5 to 4.8)          | 0.1 (0 to 0.2)                     | 2.4 (1.6 to 4.9)                       | 0.1 (0.1 to 0.2) | 2.4 (1.4 to 4.6)          | 0.1 (0.1 to 0.2)                   | 2.5 (1.5 to 4.8)                       |
| Tajikistan                 | Smoking                     | 0.1 (0.1 to 0.2)  | 3.8 (2.2 to 5.8)          | 0.1 (0.1 to 0.2)                   | 4 (2.3 to 6)                           | 0.1 (0.1 to 0.1) | 2.6 (1.6 to 4)            | 0.1 (0.1 to 0.2)                   | 2.7 (1.6 to 4.2)                       |
| Tajikistan                 | Secondhand smoke            | 0.3 (0.1 to 0.6)  | 11.9 (2.8 to 21.3)        | 0.4 (0.1 to 0.7)                   | 12.3 (2.9 to 22.1)                     | 0.3 (0.1 to 0.5) | 8.5 (1.9 to 15.5)         | 0.3 (0.1 to 0.6)                   | 8.8 (2 to 16.2)                        |
| Tajikistan                 | Metabolic risks             | 0.7 (0.2 to 1.5)  | 15.5 (-0.2 to 37.4)       | 0.6 (0.1 to 1.4)                   | 16.1 (-0.1 to 38.9)                    | 1.5 (0.5 to 3)   | 32.7 (6.7 to 70.4)        | 1.3 (0.3 to 3)                     | 34.1 (7 to 73.4)                       |
| Tajikistan                 | High body-mass index        | 0.2 (0 to 0.6)    | 1.8 (-7.2 to 10.5)        | 0.1 (-0.2 to 0.4)                  | 1.9 (-7.4 to 10.8)                     | 0.4 (0 to 0.9)   | 5.3 (-4.9 to 16.7)        | 0.2 (-0.1 to 0.7)                  | 5.6 (-5 to 17.6)                       |
| Tajikistan                 | High fasting plasma glucose | 0.5 (0.1 to 1.2)  | 14 (2.5 to 33.1)          | 0.5 (0.1 to 1.2)                   | 14.5 (2.6 to 34.2)                     | 1.2 (0.2 to 2.6) | 28.4 (5.4 to 65.3)        | 1.1 (0.2 to 2.7)                   | 29.5 (5.6 to 68.1)                     |
| Thailand                   | All risk factors            | 2.4 (1.4 to 3.4)  | 67.3 (42 to 96.5)         | 2.4 (1.3 to 3.7)                   | 69.6 (43.6 to 100.1)                   | 3.6 (2 to 5.8)   | 98.2 (56.8 to 155.2)      | 6 (3.1 to 10)                      | 104.2 (60.7 to 165)                    |
| Thailand                   | Behavioral risks            | 1.2 (0.9 to 1.7)  | 38.1 (25.8 to 51)         | 1.3 (0.8 to 2)                     | 39.4 (26.8 to 52.5)                    | 1.2 (0.8 to 1.8) | 37.9 (24.1 to 55)         | 2.3 (1.3 to 3.8)                   | 40.2 (25.4 to 59.1)                    |
| Thailand                   | Alcohol use                 | 0.4 (0.3 to 0.5)  | 12.3 (9.1 to 16.6)        | 0.4 (0.3 to 0.6)                   | 12.8 (9.4 to 17.1)                     | 0.5 (0.3 to 0.7) | 15 (9.7 to 21.9)          | 0.9 (0.5 to 1.5)                   | 16 (10.4 to 23.2)                      |
| Thailand                   | Diet high in red meat       | 0.2 (0 to 0.3)    | 6.1 (1.2 to 8.9)          | 0.2 (0 to 0.4)                     | 6.3 (1.2 to 9.1)                       | 0.2 (0 to 0.4)   | 7.7 (1.5 to 12.6)         | 0.5 (0.1 to 0.9)                   | 8.2 (1.6 to 13.3)                      |
| Thailand                   | Low physical activity       | 0.1 (0 to 0.1)    | 1.8 (1.1 to 3.6)          | 0.1 (0 to 0.1)                     | 1.9 (1.1 to 3.7)                       | 0.1 (0 to 0.2)   | 2.1 (1.1 to 4)            | 0.1 (0.1 to 0.3)                   | 2.2 (1.2 to 4.3)                       |
| Thailand                   | Smoking                     | 0.2 (0.1 to 0.3)  | 5.7 (3.3 to 8.7)          | 0.2 (0.1 to 0.4)                   | 5.9 (3.5 to 9.1)                       | 0.1 (0.1 to 0.2) | 2.9 (1.6 to 4.6)          | 0.2 (0.1 to 0.3)                   | 3.1 (1.7 to 4.9)                       |
| Thailand                   | Secondhand smoke            | 0.4 (0.1 to 0.8)  | 13.8 (3.2 to 24.9)        | 0.5 (0.1 to 0.9)                   | 14.3 (3.3 to 25.7)                     | 0.4 (0.1 to 0.7) | 11.6 (2.8 to 22)          | 0.7 (0.2 to 1.4)                   | 12.3 (3 to 23.3)                       |

| Location    | Risk factor                 | 1990               |                           |                                    |                                        | 2019               |                           |                                    |                                        |
|-------------|-----------------------------|--------------------|---------------------------|------------------------------------|----------------------------------------|--------------------|---------------------------|------------------------------------|----------------------------------------|
|             |                             | Deaths             | YLLs (Years of Life Lost) | YLDs (Years Lived with Disability) | DALYs (Disability-Adjusted Life Years) | Deaths             | YLLs (Years of Life Lost) | YLDs (Years Lived with Disability) | DALYs (Disability-Adjusted Life Years) |
| Thailand    | Metabolic risks             | 1.3 (0.4 to 2.4)   | 32.7 (11.6 to 62)         | 1.2 (0.4 to 2.4)                   | 33.9 (12 to 63.9)                      | 2.7 (1.1 to 4.7)   | 67.1 (26.7 to 119.6)      | 4.1 (1.7 to 7.3)                   | 71.2 (28.4 to 127)                     |
| Thailand    | High body-mass index        | 0.8 (0.2 to 1.8)   | 21.6 (4.9 to 47.3)        | 0.8 (0.2 to 1.8)                   | 22.3 (5.2 to 48.5)                     | 2 (0.6 to 3.8)     | 51.8 (16.2 to 98.5)       | 3.1 (1 to 6.1)                     | 55 (17.5 to 104.3)                     |
| Thailand    | High fasting plasma glucose | 0.5 (0.1 to 1.2)   | 12.1 (2.3 to 29.3)        | 0.4 (0.1 to 1.1)                   | 12.6 (2.3 to 30.2)                     | 0.8 (0.2 to 2)     | 18.7 (3.5 to 45.8)        | 1.2 (0.2 to 3)                     | 19.9 (3.7 to 48.2)                     |
| Timor-Leste | All risk factors            | 1.9 (1 to 3.1)     | 52.9 (29 to 89.8)         | 1.3 (0.7 to 2.1)                   | 54.2 (29.7 to 91.6)                    | 3.1 (1.6 to 5.1)   | 82.3 (43.2 to 137.2)      | 2.5 (1.2 to 4.5)                   | 84.9 (44.9 to 141.2)                   |
| Timor-Leste | Behavioral risks            | 1 (0.5 to 1.6)     | 31.3 (14.6 to 50)         | 0.7 (0.3 to 1.2)                   | 32 (14.9 to 51.4)                      | 1.3 (0.7 to 2.1)   | 39.4 (20.7 to 63.8)       | 1.2 (0.6 to 2)                     | 40.6 (21.2 to 65.9)                    |
| Timor-Leste | Alcohol use                 | 0.1 (0 to 0.1)     | 2.6 (1.3 to 4.5)          | 0.1 (0 to 0.1)                     | 2.6 (1.3 to 4.6)                       | 0.2 (0.1 to 0.4)   | 7.2 (3.8 to 11.8)         | 0.2 (0.1 to 0.4)                   | 7.4 (3.9 to 12.1)                      |
| Timor-Leste | Diet high in red meat       | 0.2 (0 to 0.3)     | 5.6 (1 to 9.3)            | 0.1 (0 to 0.2)                     | 5.8 (1 to 9.5)                         | 0.3 (0 to 0.4)     | 7.8 (1.5 to 13.7)         | 0.2 (0 to 0.4)                     | 8 (1.5 to 14.1)                        |
| Timor-Leste | Low physical activity       | 0.1 (0 to 0.2)     | 2 (1.1 to 4.5)            | 0.1 (0 to 0.1)                     | 2.1 (1.1 to 4.6)                       | 0.1 (0.1 to 0.2)   | 2.5 (1.3 to 5.1)          | 0.1 (0 to 0.2)                     | 2.6 (1.4 to 5.3)                       |
| Timor-Leste | Smoking                     | 0.1 (0.1 to 0.2)   | 3.2 (1.3 to 5.8)          | 0.1 (0 to 0.2)                     | 3.2 (1.3 to 6)                         | 0.1 (0.1 to 0.2)   | 3.3 (1.5 to 5.9)          | 0.1 (0 to 0.2)                     | 3.4 (1.5 to 6)                         |
| Timor-Leste | Secondhand smoke            | 0.6 (0.1 to 1.1)   | 18.6 (4.3 to 35.6)        | 0.4 (0.1 to 0.8)                   | 19.1 (4.4 to 36.4)                     | 0.6 (0.1 to 1.2)   | 19.8 (4.4 to 37.8)        | 0.6 (0.1 to 1.2)                   | 20.4 (4.5 to 38.8)                     |
| Timor-Leste | Metabolic risks             | 0.9 (0.3 to 2)     | 23.5 (6.5 to 51.7)        | 0.6 (0.2 to 1.3)                   | 24.1 (6.7 to 52.9)                     | 1.9 (0.6 to 3.8)   | 46.7 (14.7 to 94.3)       | 1.5 (0.5 to 3.1)                   | 48.2 (15.2 to 97)                      |
| Timor-Leste | High body-mass index        | 0.5 (0.1 to 1.3)   | 13 (2.1 to 34.5)          | 0.3 (0 to 0.8)                     | 13.3 (2.2 to 35.3)                     | 0.8 (0.2 to 2.1)   | 22.1 (4.6 to 55)          | 0.7 (0.1 to 1.7)                   | 22.8 (4.7 to 56.6)                     |
| Timor-Leste | High fasting plasma glucose | 0.5 (0.1 to 1.1)   | 11 (1.9 to 26.9)          | 0.3 (0 to 0.7)                     | 11.3 (1.9 to 27.6)                     | 1.1 (0.2 to 2.7)   | 26.1 (4.7 to 63.9)        | 0.8 (0.1 to 2.1)                   | 26.9 (4.8 to 65.8)                     |
| Togo        | All risk factors            | 2 (1.4 to 2.8)     | 53.4 (36.2 to 73.9)       | 1.4 (0.8 to 2.1)                   | 54.8 (37.1 to 75.6)                    | 2.6 (1.6 to 4.1)   | 62.6 (37.6 to 97.4)       | 1.9 (1 to 3.1)                     | 64.5 (38.9 to 100.5)                   |
| Togo        | Behavioral risks            | 1.4 (1 to 1.8)     | 41.3 (29.3 to 54.8)       | 1 (0.6 to 1.5)                     | 42.3 (30.1 to 56)                      | 1.4 (1 to 2)       | 40.4 (26.6 to 58.3)       | 1.1 (0.7 to 1.8)                   | 41.6 (27.3 to 59.9)                    |
| Togo        | Alcohol use                 | 0.8 (0.5 to 1)     | 23.6 (15.7 to 32.8)       | 0.6 (0.3 to 0.9)                   | 24.1 (16.1 to 33.6)                    | 0.7 (0.4 to 1.1)   | 21.5 (12.6 to 32.4)       | 0.6 (0.3 to 1)                     | 22.1 (13 to 33.5)                      |
| Togo        | Diet high in red meat       | 0.1 (0 to 0.2)     | 4.2 (1 to 6.6)            | 0.1 (0 to 0.2)                     | 4.3 (1 to 6.7)                         | 0.2 (0 to 0.3)     | 4.7 (1.1 to 7.9)          | 0.1 (0 to 0.2)                     | 4.9 (1.2 to 8.1)                       |
| Togo        | Low physical activity       | 0.1 (0.1 to 0.2)   | 2.9 (1.6 to 5.4)          | 0.1 (0 to 0.1)                     | 3 (1.6 to 5.5)                         | 0.2 (0.1 to 0.3)   | 3.6 (1.8 to 6.7)          | 0.1 (0.1 to 0.2)                   | 3.7 (1.9 to 6.9)                       |
| Togo        | Smoking                     | 0.2 (0.1 to 0.2)   | 3.8 (2.2 to 5.6)          | 0.1 (0.1 to 0.2)                   | 3.9 (2.3 to 5.8)                       | 0.2 (0.1 to 0.3)   | 3.9 (2.3 to 6.1)          | 0.1 (0.1 to 0.2)                   | 4 (2.4 to 6.3)                         |
| Togo        | Secondhand smoke            | 0.2 (0.1 to 0.4)   | 8.1 (1.9 to 14.9)         | 0.2 (0 to 0.4)                     | 8.3 (1.9 to 15.2)                      | 0.2 (0.1 to 0.5)   | 7.9 (1.7 to 14.9)         | 0.2 (0 to 0.4)                     | 8.1 (1.8 to 15.3)                      |
| Togo        | Metabolic risks             | 0.7 (0.2 to 1.4)   | 13.4 (2.1 to 30.1)        | 0.4 (0.1 to 0.9)                   | 13.8 (2.2 to 31)                       | 1.3 (0.4 to 2.7)   | 24.1 (3.6 to 54.3)        | 0.8 (0.2 to 1.8)                   | 24.9 (3.9 to 55.8)                     |
| Togo        | High body-mass index        | 0.3 (0 to 0.6)     | 4.1 (-2.8 to 12.1)        | 0.1 (0 to 0.4)                     | 4.2 (-2.8 to 12.5)                     | 0.6 (0.1 to 1.2)   | 7.8 (-5.5 to 22.6)        | 0.3 (-0.1 to 0.7)                  | 8 (-5.7 to 23.1)                       |
| Togo        | High fasting plasma glucose | 0.4 (0.1 to 1)     | 9.6 (1.8 to 22.8)         | 0.3 (0 to 0.7)                     | 9.8 (1.8 to 23.5)                      | 0.8 (0.1 to 1.9)   | 17.1 (2.9 to 41.7)        | 0.5 (0.1 to 1.4)                   | 17.6 (3 to 43.2)                       |
| Tokelau     | All risk factors            | 8.2 (4 to 13.6)    | 228.5 (114.1 to 378.5)    | 6.8 (3.4 to 11.9)                  | 235.3 (117.7 to 388.2)                 | 13.1 (7.1 to 21)   | 345.3 (187.1 to 552.1)    | 14.2 (7.3 to 23.9)                 | 359.5 (193.8 to 574.2)                 |
| Tokelau     | Behavioral risks            | 3.2 (1.6 to 4.9)   | 97.4 (48.7 to 150.5)      | 2.8 (1.3 to 4.8)                   | 100.3 (50.5 to 154.4)                  | 4.1 (2.5 to 6.1)   | 120.8 (71.2 to 183.3)     | 5 (2.6 to 8)                       | 125.7 (73.9 to 189.4)                  |
| Tokelau     | Alcohol use                 | 0.3 (0.1 to 0.6)   | 11.3 (4.1 to 21.9)        | 0.3 (0.1 to 0.6)                   | 11.6 (4.2 to 22.6)                     | 0.5 (0.2 to 0.9)   | 18.2 (7.9 to 33.5)        | 0.7 (0.3 to 1.4)                   | 18.9 (8.2 to 34.7)                     |
| Tokelau     | Diet high in red meat       | 0.7 (0.2 to 1.2)   | 21.3 (5.2 to 37.4)        | 0.6 (0.1 to 1.2)                   | 21.9 (5.3 to 38.4)                     | 0.9 (0.2 to 1.5)   | 27.4 (7.3 to 45.7)        | 1.1 (0.3 to 2)                     | 28.5 (7.6 to 47.6)                     |
| Tokelau     | Low physical activity       | 0.4 (0.1 to 0.8)   | 9.2 (3.2 to 19)           | 0.3 (0.1 to 0.6)                   | 9.5 (3.3 to 19.8)                      | 0.6 (0.2 to 1.1)   | 13.4 (5 to 27.2)          | 0.6 (0.2 to 1.2)                   | 14 (5.2 to 28.3)                       |
| Tokelau     | Smoking                     | 0.9 (0.4 to 1.5)   | 25.7 (10.9 to 44.8)       | 0.8 (0.3 to 1.4)                   | 26.5 (11.3 to 46.1)                    | 1 (0.5 to 1.7)     | 28 (14.4 to 48.7)         | 1.2 (0.5 to 2.1)                   | 29.2 (15 to 50.7)                      |
| Tokelau     | Secondhand smoke            | 1.1 (0.2 to 2.2)   | 34.8 (7.8 to 67.9)        | 1 (0.2 to 2)                       | 35.8 (8 to 69.8)                       | 1.3 (0.3 to 2.5)   | 40 (9.5 to 77.7)          | 1.6 (0.4 to 3.3)                   | 41.6 (9.8 to 80.6)                     |
| Tokelau     | Metabolic risks             | 5.7 (2.1 to 10.9)  | 150 (55.4 to 286.8)       | 4.6 (1.7 to 8.8)                   | 154.6 (57.5 to 294.3)                  | 10.2 (4.4 to 17.9) | 257.2 (108 to 450)        | 10.6 (4.4 to 19.3)                 | 267.8 (112.1 to 466.1)                 |
| Tokelau     | High body-mass index        | 4 (1.2 to 8.6)     | 105.5 (31.8 to 224)       | 3.2 (0.9 to 6.8)                   | 108.7 (32.6 to 231.8)                  | 6.9 (2.4 to 13.1)  | 172.2 (59.5 to 318.9)     | 7 (2.3 to 13.4)                    | 179.3 (62.5 to 332.3)                  |
| Tokelau     | High fasting plasma glucose | 2.1 (0.3 to 5.1)   | 53.6 (8.5 to 133.8)       | 1.6 (0.3 to 4.3)                   | 55.2 (8.8 to 137.9)                    | 4.3 (0.8 to 10.1)  | 109.4 (19.3 to 259.2)     | 4.5 (0.8 to 11.3)                  | 113.9 (20 to 268.8)                    |
| Tonga       | All risk factors            | 10.4 (6.1 to 15.2) | 290 (168.2 to 427.1)      | 8.9 (4.6 to 13.9)                  | 298.9 (173.1 to 440.7)                 | 13.1 (7.1 to 20.1) | 346.7 (189.2 to 530.2)    | 12.9 (6.8 to 21.1)                 | 359.6 (196.2 to 550.6)                 |
| Tonga       | Behavioral risks            | 3.2 (2 to 4.5)     | 93.5 (57.8 to 133)        | 2.9 (1.6 to 4.4)                   | 96.4 (59.4 to 136.9)                   | 3.5 (2.2 to 5)     | 99.9 (60.2 to 146.9)      | 3.7 (2.1 to 6.2)                   | 103.7 (62.2 to 152)                    |
| Tonga       | Alcohol use                 | 0.1 (0 to 0.3)     | 5 (1.6 to 9.7)            | 0.1 (0 to 0.3)                     | 5.1 (1.7 to 10)                        | 0.3 (0.1 to 0.5)   | 9 (3.1 to 17.8)           | 0.3 (0.1 to 0.7)                   | 9.4 (3.2 to 18.5)                      |
| Tonga       | Diet high in red meat       | 0.7 (0.2 to 1.1)   | 22.9 (6.4 to 35.5)        | 0.7 (0.2 to 1.1)                   | 23.5 (6.6 to 36.5)                     | 0.8 (0.2 to 1.3)   | 24.7 (7 to 39.9)          | 0.9 (0.3 to 1.6)                   | 25.6 (7.2 to 41.4)                     |
| Tonga       | Low physical activity       | 0.5 (0.2 to 0.9)   | 11 (4.2 to 22.4)          | 0.4 (0.1 to 0.7)                   | 11.4 (4.3 to 23.3)                     | 0.6 (0.2 to 1.1)   | 13.6 (4.8 to 27.2)        | 0.5 (0.2 to 1.1)                   | 14.1 (5 to 28.4)                       |
| Tonga       | Smoking                     | 0.9 (0.5 to 1.3)   | 21.9 (11.6 to 34.1)       | 0.7 (0.4 to 1.2)                   | 22.6 (12.1 to 35.2)                    | 0.8 (0.5 to 1.3)   | 20.2 (10.7 to 32.4)       | 0.8 (0.4 to 1.3)                   | 21 (11.1 to 33.7)                      |

| Location            | Risk factor                 | 1990              |                           |                                    |                                        | 2019               |                           |                                    |                                        |
|---------------------|-----------------------------|-------------------|---------------------------|------------------------------------|----------------------------------------|--------------------|---------------------------|------------------------------------|----------------------------------------|
|                     |                             | Deaths            | YLLs (Years of Life Lost) | YLDs (Years Lived with Disability) | DALYs (Disability-Adjusted Life Years) | Deaths             | YLLs (Years of Life Lost) | YLDs (Years Lived with Disability) | DALYs (Disability-Adjusted Life Years) |
| Tonga               | Secondhand smoke            | 1.2 (0.3 to 2.1)  | 36.7 (8.2 to 66.3)        | 1.1 (0.2 to 2.1)                   | 37.8 (8.5 to 68.1)                     | 1.2 (0.3 to 2.2)   | 36.8 (9.3 to 67.7)        | 1.3 (0.3 to 2.6)                   | 38.1 (9.7 to 70)                       |
| Tonga               | Metabolic risks             | 8.1 (3.5 to 13.1) | 221.4 (99 to 360.5)       | 6.8 (2.8 to 11.4)                  | 228.2 (102.3 to 370.9)                 | 10.7 (4.8 to 17.9) | 277.3 (123.6 to 464.9)    | 10.3 (4.6 to 18)                   | 287.6 (129 to 480.1)                   |
| Tonga               | High body-mass index        | 6.2 (2.2 to 11)   | 173.8 (62.4 to 302)       | 5.3 (1.8 to 9.4)                   | 179.1 (64.3 to 311.2)                  | 7.9 (2.9 to 13.9)  | 206.4 (75.6 to 364.6)     | 7.6 (2.7 to 14.2)                  | 214.1 (78.6 to 375.3)                  |
| Tonga               | High fasting plasma glucose | 2.4 (0.5 to 5.7)  | 63.8 (12 to 150)          | 2 (0.4 to 4.9)                     | 65.8 (12.4 to 154.4)                   | 3.9 (0.8 to 9.1)   | 98.2 (18.3 to 231.8)      | 3.7 (0.7 to 9.4)                   | 101.9 (18.9 to 240.4)                  |
| Trinidad and Tobago | All risk factors            | 7.4 (4.8 to 10.6) | 186.2 (119.9 to 266.2)    | 7.7 (4.5 to 12.1)                  | 193.9 (124.4 to 276.3)                 | 7 (4.1 to 11.4)    | 170.6 (99.3 to 277.7)     | 9.3 (5 to 15.8)                    | 179.9 (104.7 to 290.6)                 |
| Trinidad and Tobago | Behavioral risks            | 3.9 (3.1 to 4.8)  | 116 (91.7 to 140.6)       | 4.5 (3.1 to 6.2)                   | 120.5 (95.5 to 145.6)                  | 3.4 (2.4 to 4.8)   | 99.9 (67.5 to 140.6)      | 5.2 (3.2 to 8)                     | 105.1 (70.8 to 147.7)                  |
| Trinidad and Tobago | Alcohol use                 | 1.8 (1.4 to 2.3)  | 58.8 (45.4 to 73.3)       | 2.2 (1.5 to 3.2)                   | 61 (47.1 to 76.5)                      | 1.6 (1.1 to 2.3)   | 51.3 (33.5 to 73.5)       | 2.6 (1.5 to 4.1)                   | 53.9 (35.3 to 77.5)                    |
| Trinidad and Tobago | Diet high in red meat       | 0.4 (0.1 to 0.6)  | 12.5 (2.3 to 17.1)        | 0.5 (0.1 to 0.8)                   | 12.9 (2.4 to 17.7)                     | 0.4 (0.1 to 0.7)   | 12.6 (2.4 to 20.8)        | 0.7 (0.1 to 1.2)                   | 13.2 (2.5 to 21.9)                     |
| Trinidad and Tobago | Low physical activity       | 0.6 (0.2 to 1)    | 12.4 (4.2 to 23.8)        | 0.5 (0.2 to 1)                     | 12.9 (4.4 to 24.7)                     | 0.6 (0.2 to 1)     | 12.7 (3.9 to 24.6)        | 0.7 (0.2 to 1.4)                   | 13.4 (4.2 to 25.8)                     |
| Trinidad and Tobago | Smoking                     | 0.8 (0.5 to 1.1)  | 21 (13.1 to 30.6)         | 0.8 (0.5 to 1.4)                   | 21.8 (13.7 to 31.9)                    | 0.5 (0.3 to 0.8)   | 13.5 (7.7 to 21.2)        | 0.7 (0.4 to 1.2)                   | 14.3 (8.2 to 22.4)                     |
| Trinidad and Tobago | Secondhand smoke            | 0.6 (0.1 to 1)    | 18 (4.1 to 31.4)          | 0.7 (0.2 to 1.3)                   | 18.7 (4.3 to 32.7)                     | 0.5 (0.1 to 1)     | 15.6 (3.8 to 29.5)        | 0.8 (0.2 to 1.6)                   | 16.4 (4 to 30.9)                       |
| Trinidad and Tobago | Metabolic risks             | 4.1 (1.3 to 7.8)  | 82 (14.1 to 171.6)        | 3.7 (0.9 to 7.9)                   | 85.7 (15 to 179.6)                     | 4.2 (1.4 to 8.4)   | 83 (13.1 to 184.2)        | 4.8 (1.2 to 10.6)                  | 87.8 (14.2 to 192.7)                   |
| Trinidad and Tobago | High body-mass index        | 1.1 (0 to 2.4)    | 10 (-19.7 to 39.4)        | 0.7 (-0.5 to 2)                    | 10.7 (-20.3 to 41.3)                   | 1.3 (0.1 to 2.9)   | 14.9 (-17.9 to 50.2)      | 1.1 (-0.7 to 3.1)                  | 16 (-18.7 to 53.2)                     |
| Trinidad and Tobago | High fasting plasma glucose | 3.2 (0.7 to 6.8)  | 76.1 (15.2 to 163.6)      | 3.2 (0.6 to 7.3)                   | 79.3 (15.9 to 169.4)                   | 3.2 (0.6 to 7.3)   | 73.6 (14.7 to 172.2)      | 4.1 (0.8 to 9.9)                   | 77.6 (15.4 to 181.6)                   |
| Tunisia             | All risk factors            | 2.2 (1.2 to 3.6)  | 53.7 (27.9 to 87.4)       | 2.3 (1.1 to 3.9)                   | 56 (29.1 to 91.3)                      | 3.3 (1.7 to 5.7)   | 75.2 (35.7 to 133.8)      | 5.1 (2.3 to 9.9)                   | 80.3 (38.2 to 142.4)                   |
| Tunisia             | Behavioral risks            | 1.1 (0.6 to 1.6)  | 33.9 (18.7 to 49.3)       | 1.4 (0.7 to 2.2)                   | 35.2 (19.3 to 51.1)                    | 1.3 (0.7 to 1.9)   | 38.6 (22.1 to 59.2)       | 2.6 (1.3 to 4.3)                   | 41.2 (23.4 to 63.3)                    |
| Tunisia             | Alcohol use                 | 0.1 (0.1 to 0.2)  | 4.7 (3.1 to 6.7)          | 0.2 (0.1 to 0.3)                   | 4.9 (3.2 to 6.9)                       | 0.2 (0.1 to 0.4)   | 8.6 (5.4 to 12.9)         | 0.6 (0.3 to 1)                     | 9.2 (5.7 to 13.8)                      |
| Tunisia             | Diet high in red meat       | 0.3 (0.1 to 0.4)  | 7.9 (1.5 to 12)           | 0.3 (0.1 to 0.5)                   | 8.2 (1.6 to 12.4)                      | 0.3 (0.1 to 0.5)   | 8.4 (1.5 to 13.9)         | 0.6 (0.1 to 1)                     | 9 (1.6 to 14.9)                        |
| Tunisia             | Low physical activity       | 0.1 (0.1 to 0.2)  | 2.4 (1.4 to 4.5)          | 0.1 (0.1 to 0.2)                   | 2.5 (1.4 to 4.7)                       | 0.1 (0.1 to 0.2)   | 3 (1.5 to 5.5)            | 0.2 (0.1 to 0.4)                   | 3.2 (1.6 to 6)                         |
| Tunisia             | Smoking                     | 0.1 (0.1 to 0.2)  | 3.3 (1.9 to 5.2)          | 0.1 (0.1 to 0.2)                   | 3.4 (2 to 5.4)                         | 0.1 (0.1 to 0.2)   | 3.1 (1.8 to 5)            | 0.2 (0.1 to 0.4)                   | 3.4 (2 to 5.4)                         |
| Tunisia             | Secondhand smoke            | 0.5 (0.1 to 0.9)  | 16.6 (3.7 to 29)          | 0.7 (0.1 to 1.2)                   | 17.2 (3.9 to 30)                       | 0.5 (0.1 to 1)     | 16.7 (3.9 to 32.3)        | 1.1 (0.3 to 2.2)                   | 17.9 (4.1 to 34.3)                     |
| Tunisia             | Metabolic risks             | 1.2 (0.3 to 2.6)  | 21.4 (-0.4 to 52.9)       | 1 (0.1 to 2.4)                     | 22.4 (-0.3 to 55.4)                    | 2.2 (0.7 to 4.5)   | 39.5 (2.7 to 93)          | 2.7 (0.1 to 6.6)                   | 42.1 (2.8 to 99)                       |
| Tunisia             | High body-mass index        | 0.5 (0 to 1.1)    | 4 (-9.4 to 17.4)          | 0.2 (-0.3 to 0.8)                  | 4.2 (-9.7 to 18.2)                     | 0.7 (-0.1 to 1.7)  | 5.4 (-15.7 to 27)         | 0.3 (-1.3 to 1.8)                  | 5.7 (-16.9 to 28.7)                    |
| Tunisia             | High fasting plasma glucose | 0.8 (0.2 to 1.9)  | 18.4 (3.3 to 44.2)        | 0.8 (0.1 to 2)                     | 19.2 (3.5 to 46.1)                     | 1.6 (0.3 to 3.7)   | 36.4 (7 to 88.9)          | 2.5 (0.5 to 6.5)                   | 39 (7.5 to 95)                         |
| Turkey              | All risk factors            | 2.5 (1.6 to 3.7)  | 65.5 (39.3 to 97.2)       | 2.3 (1.3 to 3.7)                   | 67.8 (40.6 to 100.3)                   | 2.9 (1.7 to 4.5)   | 65.3 (36.7 to 101.1)      | 4.4 (2.3 to 7.3)                   | 69.8 (39.3 to 107.1)                   |
| Turkey              | Behavioral risks            | 1.5 (1 to 2.1)    | 48.1 (32.1 to 66.3)       | 1.6 (0.9 to 2.4)                   | 49.7 (33.3 to 68.5)                    | 1.5 (1 to 2)       | 41.8 (28.2 to 56.3)       | 2.8 (1.7 to 4.4)                   | 44.6 (30.1 to 60.7)                    |
| Turkey              | Alcohol use                 | 0.3 (0.2 to 0.4)  | 9.2 (6.4 to 13)           | 0.3 (0.2 to 0.5)                   | 9.5 (6.6 to 13.4)                      | 0.3 (0.2 to 0.4)   | 8.7 (5.7 to 12.5)         | 0.6 (0.4 to 0.9)                   | 9.3 (6.1 to 13.4)                      |
| Turkey              | Diet high in red meat       | 0.2 (0 to 0.4)    | 7.6 (1.5 to 11.6)         | 0.2 (0 to 0.4)                     | 7.8 (1.6 to 12)                        | 0.2 (0 to 0.4)     | 7 (1.5 to 10.6)           | 0.5 (0.1 to 0.8)                   | 7.4 (1.6 to 11.4)                      |
| Turkey              | Low physical activity       | 0.2 (0.1 to 0.3)  | 4.3 (1.9 to 8)            | 0.2 (0.1 to 0.3)                   | 4.4 (2 to 8.3)                         | 0.2 (0.1 to 0.4)   | 5.1 (2 to 9.6)            | 0.4 (0.1 to 0.7)                   | 5.4 (2.2 to 10.3)                      |
| Turkey              | Smoking                     | 0.4 (0.3 to 0.7)  | 14.2 (8.7 to 22)          | 0.5 (0.2 to 0.8)                   | 14.7 (9 to 22.7)                       | 0.4 (0.3 to 0.6)   | 12.5 (7.7 to 17.9)        | 0.8 (0.4 to 1.3)                   | 13.3 (8.1 to 19.1)                     |
| Turkey              | Secondhand smoke            | 0.5 (0.1 to 0.9)  | 15.5 (3.4 to 28.6)        | 0.5 (0.1 to 1)                     | 16 (3.5 to 29.7)                       | 0.4 (0.1 to 0.7)   | 10.7 (2.4 to 19.6)        | 0.7 (0.2 to 1.4)                   | 11.5 (2.6 to 20.8)                     |
| Turkey              | Metabolic risks             | 1.1 (0.3 to 2.2)  | 20 (-0.6 to 47.7)         | 0.8 (0 to 1.8)                     | 20.9 (-0.5 to 49.3)                    | 1.7 (0.5 to 3.2)   | 26.8 (1.6 to 60.2)        | 1.8 (0.1 to 4.2)                   | 28.6 (1.8 to 63.5)                     |
| Turkey              | High body-mass index        | 0.5 (0 to 1.1)    | 4.6 (-10 to 19)           | 0.3 (-0.2 to 0.8)                  | 4.9 (-10.3 to 19.8)                    | 0.8 (0.1 to 1.6)   | 7.2 (-10.5 to 24.9)       | 0.4 (-0.8 to 1.7)                  | 7.6 (-11.2 to 26.3)                    |
| Turkey              | High fasting plasma glucose | 0.7 (0.1 to 1.6)  | 16.4 (3 to 39.4)          | 0.6 (0.1 to 1.5)                   | 17 (3.1 to 40.8)                       | 1 (0.2 to 2.3)     | 21.4 (3.9 to 50.9)        | 1.5 (0.3 to 3.9)                   | 22.9 (4.2 to 54.7)                     |
| Turkmenistan        | All risk factors            | 2.3 (1.5 to 3.1)  | 64.5 (41.2 to 88.1)       | 2.3 (1.3 to 3.5)                   | 66.9 (43.1 to 90.7)                    | 2.7 (1.7 to 4)     | 76.5 (45.5 to 114.9)      | 3.6 (2 to 5.9)                     | 80.2 (47.8 to 120)                     |
| Turkmenistan        | Behavioral risks            | 1.5 (1 to 2)      | 50.5 (34.2 to 64.7)       | 1.7 (1 to 2.5)                     | 52.2 (35.4 to 67.1)                    | 1.8 (1.2 to 2.5)   | 60.5 (40.6 to 82.7)       | 2.8 (1.7 to 4.3)                   | 63.3 (42.2 to 86.7)                    |
| Turkmenistan        | Alcohol use                 | 0.2 (0.1 to 0.4)  | 9 (5.2 to 13.7)           | 0.3 (0.2 to 0.5)                   | 9.3 (5.4 to 14.1)                      | 0.5 (0.3 to 0.7)   | 18.5 (12 to 26.6)         | 0.8 (0.5 to 1.4)                   | 19.3 (12.5 to 27.9)                    |
| Turkmenistan        | Diet high in red meat       | 0.6 (0.3 to 0.8)  | 20.1 (9.2 to 26.8)        | 0.7 (0.3 to 1.1)                   | 20.8 (9.5 to 27.7)                     | 0.7 (0.3 to 1.1)   | 24 (11.2 to 37)           | 1.1 (0.5 to 1.9)                   | 25.1 (11.7 to 38.7)                    |
| Turkmenistan        | Low physical activity       | 0.1 (0.1 to 0.2)  | 2.2 (1.4 to 4.3)          | 0.1 (0 to 0.2)                     | 2.3 (1.5 to 4.5)                       | 0.1 (0.1 to 0.2)   | 2.4 (1.4 to 4.6)          | 0.1 (0.1 to 0.2)                   | 2.5 (1.5 to 4.9)                       |
| Turkmenistan        | Smoking                     | 0.2 (0.1 to 0.3)  | 6.1 (3.7 to 9.2)          | 0.2 (0.1 to 0.3)                   | 6.3 (3.8 to 9.6)                       | 0.1 (0.1 to 0.2)   | 4.9 (2.6 to 7.7)          | 0.2 (0.1 to 0.4)                   | 5.1 (2.7 to 8.1)                       |

| Location             | Risk factor                 | 1990              |                           |                                    |                                        | 2019               |                           |                                    |                                        |
|----------------------|-----------------------------|-------------------|---------------------------|------------------------------------|----------------------------------------|--------------------|---------------------------|------------------------------------|----------------------------------------|
|                      |                             | Deaths            | YLLs (Years of Life Lost) | YLDs (Years Lived with Disability) | DALYs (Disability-Adjusted Life Years) | Deaths             | YLLs (Years of Life Lost) | YLDs (Years Lived with Disability) | DALYs (Disability-Adjusted Life Years) |
| Turkmenistan         | Secondhand smoke            | 0.5 (0.1 to 0.8)  | 15.4 (3.7 to 26.5)        | 0.5 (0.1 to 1)                     | 15.9 (3.8 to 27.3)                     | 0.4 (0.1 to 0.8)   | 14.3 (3.1 to 25.7)        | 0.7 (0.1 to 1.3)                   | 15 (3.3 to 26.7)                       |
| Turkmenistan         | Metabolic risks             | 0.8 (0.2 to 1.7)  | 15.9 (-1.5 to 38.2)       | 0.7 (0 to 1.5)                     | 16.6 (-1.5 to 39.7)                    | 1.1 (0.2 to 2.2)   | 18.5 (-7.1 to 51.7)       | 1 (-0.3 to 2.5)                    | 19.5 (-7.6 to 53.8)                    |
| Turkmenistan         | High body-mass index        | 0.4 (0 to 1)      | 3.9 (-9.2 to 16.8)        | 0.2 (-0.2 to 0.8)                  | 4.1 (-9.5 to 17.6)                     | 0.4 (-0.2 to 1)    | -1.5 (-19.7 to 14.3)      | 0 (-1 to 0.8)                      | -1.5 (-20.9 to 14.9)                   |
| Turkmenistan         | High fasting plasma glucose | 0.5 (0.1 to 1.1)  | 12.5 (2.3 to 29.2)        | 0.5 (0.1 to 1.2)                   | 13 (2.4 to 30.3)                       | 0.7 (0.1 to 1.8)   | 20.9 (3.8 to 50.7)        | 1 (0.2 to 2.6)                     | 21.9 (4 to 52.9)                       |
| Tuvalu               | All risk factors            | 8.1 (4.4 to 12.7) | 229.3 (128.4 to 357.3)    | 6.3 (3.5 to 10.1)                  | 235.6 (131.6 to 366.5)                 | 12.7 (6.6 to 20.5) | 336.7 (174.7 to 545.9)    | 11.7 (5.9 to 19.8)                 | 348.4 (183.3 to 561.2)                 |
| Tuvalu               | Behavioral risks            | 3.4 (2.1 to 5)    | 105.1 (63.2 to 155.8)     | 2.8 (1.6 to 4.4)                   | 108 (65 to 159.7)                      | 4.2 (2.5 to 6.4)   | 120.6 (71.9 to 189.6)     | 4.2 (2.3 to 6.9)                   | 124.7 (74.1 to 195.6)                  |
| Tuvalu               | Alcohol use                 | 0.2 (0.1 to 0.4)  | 8.8 (4 to 15.3)           | 0.2 (0.1 to 0.4)                   | 9.1 (4.1 to 15.7)                      | 0.3 (0.1 to 0.6)   | 11.7 (4.9 to 21.5)        | 0.4 (0.2 to 0.8)                   | 12.1 (5.1 to 22.2)                     |
| Tuvalu               | Diet high in red meat       | 0.7 (0.2 to 1.1)  | 21.6 (5.4 to 34.5)        | 0.6 (0.1 to 1)                     | 22.2 (5.6 to 35.4)                     | 0.9 (0.2 to 1.5)   | 25.9 (6.7 to 45.1)        | 0.9 (0.2 to 1.6)                   | 26.8 (6.9 to 46.6)                     |
| Tuvalu               | Low physical activity       | 0.4 (0.2 to 0.8)  | 9.6 (3.7 to 19.9)         | 0.3 (0.1 to 0.6)                   | 9.9 (3.8 to 20.3)                      | 0.6 (0.2 to 1.2)   | 13.1 (4.6 to 28.4)        | 0.5 (0.2 to 1.1)                   | 13.6 (4.8 to 29.5)                     |
| Tuvalu               | Smoking                     | 1.1 (0.6 to 1.8)  | 32.2 (16.4 to 52.8)       | 0.9 (0.4 to 1.6)                   | 33.1 (16.9 to 54.1)                    | 1.3 (0.6 to 2.1)   | 34.1 (16.4 to 58.2)       | 1.2 (0.6 to 2.1)                   | 35.3 (16.9 to 60.1)                    |
| Tuvalu               | Secondhand smoke            | 1.2 (0.3 to 2.2)  | 38 (8.4 to 69.2)          | 1 (0.2 to 1.9)                     | 39 (8.6 to 70.9)                       | 1.4 (0.3 to 2.7)   | 41.6 (8.6 to 82.9)        | 1.4 (0.3 to 2.8)                   | 43 (8.9 to 85.1)                       |
| Tuvalu               | Metabolic risks             | 5.3 (2 to 9.9)    | 142.3 (52.3 to 264.7)     | 4 (1.5 to 7.4)                     | 146.3 (53.7 to 271)                    | 9.8 (3.8 to 17.5)  | 246.8 (94.5 to 447.8)     | 8.6 (3.3 to 16.6)                  | 255.5 (98.2 to 463.2)                  |
| Tuvalu               | High body-mass index        | 3.5 (1 to 7.5)    | 94.5 (27.7 to 197.8)      | 2.7 (0.7 to 5.6)                   | 97.1 (28.5 to 203.3)                   | 6 (1.8 to 12)      | 152.9 (46.9 to 299.9)     | 5.3 (1.6 to 10.5)                  | 158.2 (49 to 312.7)                    |
| Tuvalu               | High fasting plasma glucose | 2.1 (0.4 to 5)    | 55.5 (10.6 to 133.6)      | 1.6 (0.3 to 3.9)                   | 57.1 (11 to 136.6)                     | 4.6 (1 to 10.9)    | 116.1 (23.6 to 280.7)     | 4.1 (0.8 to 9.8)                   | 120.2 (24.5 to 290.4)                  |
| Uganda               | All risk factors            | 2.3 (1.5 to 3.4)  | 63 (40.1 to 91)           | 1.5 (0.9 to 2.4)                   | 64.5 (41.1 to 93.5)                    | 4.3 (2.8 to 6.3)   | 114.9 (75.8 to 168.1)     | 3.3 (1.9 to 5.3)                   | 118.2 (77.8 to 172.6)                  |
| Uganda               | Behavioral risks            | 1.6 (1.1 to 2.2)  | 49.7 (32.4 to 69.1)       | 1.1 (0.7 to 1.7)                   | 50.9 (33.1 to 70.6)                    | 2.8 (2 to 3.9)     | 85.7 (58.3 to 119.7)      | 2.3 (1.4 to 3.5)                   | 88.1 (60 to 123.1)                     |
| Uganda               | Alcohol use                 | 1.1 (0.7 to 1.5)  | 33.7 (21.7 to 47.9)       | 0.8 (0.4 to 1.2)                   | 34.5 (22.1 to 49.2)                    | 1.9 (1.3 to 2.8)   | 60.9 (40.7 to 88.5)       | 1.6 (1 to 2.6)                     | 62.5 (41.6 to 90.7)                    |
| Uganda               | Diet high in red meat       | 0.2 (0 to 0.3)    | 5.7 (1.1 to 9.2)          | 0.1 (0 to 0.2)                     | 5.8 (1.1 to 9.4)                       | 0.3 (0.1 to 0.5)   | 10.5 (2 to 16.5)          | 0.3 (0.1 to 0.5)                   | 10.8 (2 to 17)                         |
| Uganda               | Low physical activity       | 0.1 (0 to 0.1)    | 1.7 (1 to 4)              | 0 (0 to 0.1)                       | 1.7 (1 to 4.1)                         | 0.1 (0.1 to 0.2)   | 2.6 (1.6 to 6.2)          | 0.1 (0 to 0.2)                     | 2.7 (1.6 to 6.3)                       |
| Uganda               | Smoking                     | 0.1 (0.1 to 0.2)  | 2.9 (1.3 to 4.9)          | 0.1 (0 to 0.1)                     | 3 (1.3 to 5.1)                         | 0.2 (0.1 to 0.4)   | 4.7 (2.1 to 8)            | 0.1 (0.1 to 0.3)                   | 4.9 (2.2 to 8.3)                       |
| Uganda               | Secondhand smoke            | 0.2 (0.1 to 0.4)  | 7.5 (1.7 to 14.2)         | 0.2 (0 to 0.3)                     | 7.6 (1.7 to 14.4)                      | 0.3 (0.1 to 0.6)   | 10 (2.2 to 18.9)          | 0.3 (0.1 to 0.5)                   | 10.3 (2.3 to 19.4)                     |
| Uganda               | Metabolic risks             | 0.7 (0.2 to 1.6)  | 14.9 (2.5 to 35.4)        | 0.4 (0.1 to 1)                     | 15.3 (2.5 to 36.3)                     | 1.7 (0.5 to 3.5)   | 33.2 (3.8 to 77.7)        | 1 (0.2 to 2.4)                     | 34.2 (4.1 to 79.8)                     |
| Uganda               | High body-mass index        | 0.1 (0 to 0.4)    | 1.4 (-2.7 to 6.7)         | 0.1 (0 to 0.2)                     | 1.4 (-2.7 to 6.9)                      | 0.5 (0 to 1.2)     | 5.8 (-10.7 to 22.7)       | 0.2 (-0.2 to 0.7)                  | 6 (-10.9 to 23.3)                      |
| Uganda               | High fasting plasma glucose | 0.6 (0.1 to 1.5)  | 13.7 (2.5 to 33.5)        | 0.4 (0.1 to 0.9)                   | 14.1 (2.6 to 34.4)                     | 1.2 (0.2 to 2.9)   | 28.3 (5.2 to 67.5)        | 0.8 (0.1 to 2.1)                   | 29.1 (5.4 to 69.6)                     |
| Ukraine              | All risk factors            | 6 (4.6 to 7.5)    | 183.8 (138.3 to 226.4)    | 7.3 (4.7 to 10.5)                  | 191.1 (144.1 to 235.7)                 | 5.3 (3.6 to 7.4)   | 153.2 (104 to 213.7)      | 7.8 (4.7 to 11.8)                  | 161.1 (110 to 223.5)                   |
| Ukraine              | Behavioral risks            | 4.5 (3.6 to 5.3)  | 155 (124 to 183.2)        | 6 (3.9 to 8.3)                     | 161 (128.9 to 190.5)                   | 3.5 (2.5 to 4.7)   | 117.1 (81.1 to 156.4)     | 5.9 (3.7 to 8.8)                   | 123 (86.2 to 163)                      |
| Ukraine              | Alcohol use                 | 2.3 (1.8 to 2.8)  | 83.1 (66.6 to 101.5)      | 3.2 (2 to 4.5)                     | 86.3 (69.2 to 105.1)                   | 2 (1.4 to 2.7)     | 68.8 (47.6 to 94)         | 3.5 (2.1 to 5.3)                   | 72.3 (50.4 to 97.5)                    |
| Ukraine              | Diet high in red meat       | 1 (0.4 to 1.3)    | 32.3 (13 to 42.5)         | 1.3 (0.5 to 2)                     | 33.5 (13.5 to 44.2)                    | 0.6 (0.2 to 1)     | 19.9 (6.7 to 30.7)        | 1 (0.3 to 1.7)                     | 20.9 (7.1 to 31.9)                     |
| Ukraine              | Low physical activity       | 0.1 (0.1 to 0.3)  | 3.6 (2.4 to 7.5)          | 0.2 (0.1 to 0.3)                   | 3.7 (2.5 to 7.8)                       | 0.1 (0.1 to 0.2)   | 2.8 (1.7 to 5.8)          | 0.2 (0.1 to 0.3)                   | 2.9 (1.8 to 6.1)                       |
| Ukraine              | Smoking                     | 0.6 (0.4 to 0.9)  | 21.4 (11.3 to 32.5)       | 0.8 (0.4 to 1.4)                   | 22.2 (11.8 to 33.7)                    | 0.5 (0.3 to 0.8)   | 16.8 (9 to 26.5)          | 0.8 (0.4 to 1.4)                   | 17.6 (9.4 to 27.7)                     |
| Ukraine              | Secondhand smoke            | 0.8 (0.2 to 1.4)  | 26.7 (6.6 to 46.4)        | 1 (0.2 to 1.9)                     | 27.8 (6.8 to 48.1)                     | 0.5 (0.1 to 1)     | 17.4 (4.2 to 32)          | 0.9 (0.2 to 1.8)                   | 18.3 (4.4 to 34)                       |
| Ukraine              | Metabolic risks             | 1.8 (0.5 to 3.5)  | 32.8 (-5 to 75.3)         | 1.5 (-0.1 to 3.3)                  | 34.2 (-5.1 to 78.4)                    | 2 (0.7 to 3.9)     | 42.3 (8.1 to 87.7)        | 2.2 (0.4 to 4.5)                   | 44.5 (8.3 to 91.6)                     |
| Ukraine              | High body-mass index        | 1.1 (0 to 2.4)    | 12.6 (-17.5 to 43.1)      | 0.7 (-0.6 to 2)                    | 13.3 (-18.2 to 45.2)                   | 1.3 (0.3 to 2.7)   | 22.4 (-5 to 54)           | 1.2 (-0.2 to 2.9)                  | 23.5 (-5.2 to 56.6)                    |
| Ukraine              | High fasting plasma glucose | 0.8 (0.1 to 1.8)  | 21.2 (3.9 to 49.6)        | 0.9 (0.2 to 2.2)                   | 22.1 (4.1 to 51.6)                     | 0.8 (0.2 to 2)     | 21.5 (4 to 53)            | 1.1 (0.2 to 3.1)                   | 22.7 (4.1 to 55.3)                     |
| United Arab Emirates | All risk factors            | 7 (3.7 to 12.3)   | 175.8 (96.5 to 297)       | 6.5 (3.4 to 11.4)                  | 182.3 (100.6 to 307.6)                 | 7.7 (4.2 to 12.5)  | 184 (95.4 to 304.4)       | 9.2 (4.7 to 16.1)                  | 193.2 (100.3 to 320.5)                 |
| United Arab Emirates | Behavioral risks            | 3.4 (2.1 to 5.3)  | 100 (62.4 to 150)         | 3.5 (2.1 to 5.6)                   | 103.6 (64.9 to 155.5)                  | 2.8 (1.8 to 4)     | 82.3 (51.3 to 118.3)      | 4.1 (2.4 to 6.4)                   | 86.3 (53.8 to 124.7)                   |
| United Arab Emirates | Alcohol use                 | 0.7 (0.4 to 1.1)  | 22.1 (14 to 34.4)         | 0.7 (0.4 to 1.2)                   | 22.9 (14.5 to 35.5)                    | 0.3 (0.2 to 0.5)   | 11.6 (6.5 to 18.4)        | 0.6 (0.3 to 1)                     | 12.2 (6.8 to 19.3)                     |
| United Arab Emirates | Diet high in red meat       | 1.2 (0.5 to 2)    | 35.1 (15.7 to 56.7)       | 1.2 (0.5 to 2.1)                   | 36.4 (16.3 to 58.8)                    | 0.7 (0.2 to 1.2)   | 21.4 (5.6 to 34.1)        | 1.1 (0.3 to 1.9)                   | 22.5 (5.9 to 36)                       |
| United Arab Emirates | Low physical activity       | 0.7 (0.2 to 1.3)  | 16.1 (5.6 to 30.5)        | 0.6 (0.2 to 1.2)                   | 16.7 (5.8 to 31.7)                     | 0.7 (0.3 to 1.3)   | 18.2 (6.6 to 32.8)        | 0.9 (0.3 to 1.8)                   | 19.2 (6.9 to 34.3)                     |

| Location                     | Risk factor                 | 1990                |                           |                                    |                                        | 2019              |                           |                                    |                                        |
|------------------------------|-----------------------------|---------------------|---------------------------|------------------------------------|----------------------------------------|-------------------|---------------------------|------------------------------------|----------------------------------------|
|                              |                             | Deaths              | YLLs (Years of Life Lost) | YLDs (Years Lived with Disability) | DALYs (Disability-Adjusted Life Years) | Deaths            | YLLs (Years of Life Lost) | YLDs (Years Lived with Disability) | DALYs (Disability-Adjusted Life Years) |
| United Arab Emirates         | Smoking                     | 0.3 (0.2 to 0.5)    | 8.1 (4.2 to 14)           | 0.3 (0.1 to 0.5)                   | 8.4 (4.4 to 14.5)                      | 0.3 (0.2 to 0.5)  | 9.2 (5.2 to 15)           | 0.4 (0.2 to 0.8)                   | 9.6 (5.4 to 15.7)                      |
| United Arab Emirates         | Secondhand smoke            | 0.8 (0.2 to 1.6)    | 24.4 (5.8 to 46.6)        | 0.9 (0.2 to 1.7)                   | 25.2 (6.1 to 48.1)                     | 0.8 (0.2 to 1.6)  | 25.5 (6 to 47.2)          | 1.2 (0.3 to 2.4)                   | 26.8 (6.4 to 49.4)                     |
| United Arab Emirates         | Metabolic risks             | 4.1 (1.3 to 8.8)    | 87.7 (20.3 to 194.5)      | 3.4 (0.9 to 7.4)                   | 91.1 (21.2 to 201.2)                   | 5.5 (1.9 to 10.3) | 114.3 (24.5 to 237.7)     | 5.8 (1.3 to 12.2)                  | 120.2 (25.6 to 249.9)                  |
| United Arab Emirates         | High body-mass index        | 1.6 (0.2 to 3.6)    | 29 (-7 to 76.7)           | 1.1 (-0.2 to 2.9)                  | 30.1 (-7 to 79.1)                      | 2 (0.1 to 4.2)    | 31.1 (-21.3 to 88.2)      | 1.5 (-1.1 to 4.2)                  | 32.6 (-22.2 to 92.3)                   |
| United Arab Emirates         | High fasting plasma glucose | 2.8 (0.5 to 7)      | 64.3 (11.6 to 162.1)      | 2.5 (0.4 to 6.3)                   | 66.8 (12.1 to 168.1)                   | 3.9 (0.8 to 8.4)  | 93.8 (19.2 to 207.8)      | 4.9 (1 to 11.2)                    | 98.7 (20.3 to 218.9)                   |
| United Kingdom               | All risk factors            | 12.6 (10.4 to 15.1) | 328.3 (273 to 383.8)      | 24.6 (16.5 to 34.2)                | 353 (291.6 to 412.5)                   | 8.2 (6.3 to 10.5) | 187.2 (145.8 to 234.3)    | 24.8 (15.1 to 37.6)                | 212 (164.6 to 267.1)                   |
| United Kingdom               | Behavioral risks            | 10 (8.6 to 11.4)    | 281.6 (242.4 to 317.5)    | 20.9 (14.2 to 29.3)                | 302.6 (258.3 to 340.5)                 | 5.5 (4.7 to 6.4)  | 141.9 (120.5 to 163.3)    | 18.5 (11.8 to 28)                  | 160.4 (135.7 to 185.6)                 |
| United Kingdom               | Alcohol use                 | 4.4 (3.6 to 5.4)    | 130.3 (107 to 155.8)      | 9.6 (6.3 to 13.6)                  | 139.9 (114.9 to 166.9)                 | 2.7 (2.1 to 3.4)  | 72.4 (57.9 to 87.7)       | 9.4 (5.8 to 14.4)                  | 81.8 (65.1 to 99.6)                    |
| United Kingdom               | Diet high in red meat       | 1.6 (0.7 to 2.1)    | 43.9 (21.3 to 58)         | 3.3 (1.4 to 5.1)                   | 47.2 (22.6 to 62.6)                    | 0.8 (0.4 to 1.1)  | 21.5 (9.7 to 29.1)        | 2.8 (1.1 to 4.6)                   | 24.3 (11.1 to 32.9)                    |
| United Kingdom               | Low physical activity       | 0.6 (0.2 to 1.1)    | 14 (4.6 to 26.8)          | 1.1 (0.4 to 2.3)                   | 15.1 (5 to 28.9)                       | 0.5 (0.2 to 0.8)  | 9.4 (3.1 to 17.3)         | 1.3 (0.4 to 2.6)                   | 10.7 (3.6 to 19.5)                     |
| United Kingdom               | Smoking                     | 3.9 (2.9 to 5)      | 107.3 (79.7 to 135.8)     | 8 (4.9 to 11.7)                    | 115.3 (85.1 to 146.8)                  | 1.8 (1.3 to 2.3)  | 44.2 (32.5 to 56.7)       | 5.8 (3.4 to 9)                     | 50 (36.4 to 64.5)                      |
| United Kingdom               | Secondhand smoke            | 0.7 (0.1 to 1.2)    | 20.8 (4.6 to 36)          | 1.5 (0.3 to 2.7)                   | 22.3 (5 to 38.6)                       | 0.3 (0.1 to 0.5)  | 9.2 (2.1 to 16)           | 1.2 (0.2 to 2.2)                   | 10.4 (2.4 to 18)                       |
| United Kingdom               | Metabolic risks             | 3.5 (1.4 to 6.6)    | 65 (16 to 129.7)          | 5.2 (1.3 to 10.3)                  | 70.2 (17.6 to 139)                     | 3.5 (1.3 to 6.4)  | 60.7 (16.5 to 120.1)      | 8.4 (2.5 to 17.7)                  | 69 (19.1 to 136.2)                     |
| United Kingdom               | High body-mass index        | 1.6 (0.4 to 3.4)    | 25.1 (-4.9 to 60.7)       | 2.1 (-0.2 to 4.8)                  | 27.1 (-5.4 to 64.9)                    | 1.3 (0.3 to 2.6)  | 17.5 (-3.5 to 41.8)       | 2.6 (-0.2 to 5.9)                  | 20.1 (-3.6 to 46.9)                    |
| United Kingdom               | High fasting plasma glucose | 2 (0.4 to 4.5)      | 42.4 (7.8 to 96.1)        | 3.3 (0.6 to 8.1)                   | 45.7 (8.4 to 103.4)                    | 2.3 (0.5 to 5.1)  | 46 (9.2 to 101.5)         | 6.2 (1.2 to 15.3)                  | 52.2 (10.4 to 116.5)                   |
| United Republic of Tanzania  | All risk factors            | 2.3 (1.6 to 3.1)    | 54.7 (38.1 to 74.7)       | 1.4 (0.9 to 2.1)                   | 56.1 (39 to 76.7)                      | 3.4 (2.3 to 4.9)  | 79.1 (52.3 to 113.1)      | 2.3 (1.4 to 3.6)                   | 81.4 (53.9 to 116.3)                   |
| United Republic of Tanzania  | Behavioral risks            | 1.7 (1.2 to 2.2)    | 44.6 (32.2 to 59.2)       | 1.1 (0.7 to 1.6)                   | 45.7 (33.1 to 60.4)                    | 2.2 (1.6 to 3)    | 57.4 (40.8 to 77.9)       | 1.6 (1 to 2.5)                     | 59 (42.1 to 79.8)                      |
| United Republic of Tanzania  | Alcohol use                 | 0.8 (0.6 to 1.2)    | 23.5 (16 to 32.9)         | 0.6 (0.3 to 0.8)                   | 24.1 (16.4 to 33.8)                    | 1.1 (0.8 to 1.5)  | 29.9 (20.8 to 41.3)       | 0.8 (0.5 to 1.3)                   | 30.8 (21.3 to 42.6)                    |
| United Republic of Tanzania  | Diet high in red meat       | 0.2 (0 to 0.3)      | 5 (0.9 to 7.7)            | 0.1 (0 to 0.2)                     | 5.2 (0.9 to 7.9)                       | 0.2 (0 to 0.4)    | 6.2 (1.2 to 9.9)          | 0.2 (0 to 0.3)                     | 6.4 (1.2 to 10.1)                      |
| United Republic of Tanzania  | Low physical activity       | 0.1 (0 to 0.1)      | 1.5 (0.9 to 3.3)          | 0 (0 to 0.1)                       | 1.5 (0.9 to 3.4)                       | 0.1 (0.1 to 0.2)  | 2 (1.2 to 4.6)            | 0.1 (0 to 0.1)                     | 2.1 (1.3 to 4.7)                       |
| United Republic of Tanzania  | Smoking                     | 0.4 (0.2 to 0.6)    | 8.2 (3.6 to 13.2)         | 0.2 (0.1 to 0.4)                   | 8.5 (3.7 to 13.5)                      | 0.5 (0.3 to 0.9)  | 11.3 (5.1 to 18.6)        | 0.3 (0.1 to 0.6)                   | 11.7 (5.3 to 19.1)                     |
| United Republic of Tanzania  | Secondhand smoke            | 0.3 (0.1 to 0.5)    | 8.4 (2 to 15.2)           | 0.2 (0 to 0.4)                     | 8.6 (2 to 15.6)                        | 0.4 (0.1 to 0.6)  | 10.5 (2.3 to 18.7)        | 0.3 (0.1 to 0.6)                   | 10.8 (2.4 to 19.2)                     |
| United Republic of Tanzania  | Metabolic risks             | 0.7 (0.2 to 1.4)    | 11.8 (2.1 to 26.6)        | 0.3 (0.1 to 0.7)                   | 12.1 (2.1 to 27.4)                     | 1.4 (0.5 to 2.7)  | 25.1 (4.6 to 53.9)        | 0.8 (0.2 to 1.7)                   | 25.9 (4.7 to 55.5)                     |
| United Republic of Tanzania  | High body-mass index        | 0.3 (0 to 0.7)      | 4.3 (-1.6 to 12.4)        | 0.1 (0 to 0.4)                     | 4.4 (-1.6 to 12.8)                     | 0.6 (0.1 to 1.3)  | 8.9 (-4 to 23.9)          | 0.3 (-0.1 to 0.8)                  | 9.2 (-4.2 to 24.6)                     |
| United Republic of Tanzania  | High fasting plasma glucose | 0.4 (0.1 to 1)      | 7.7 (1.4 to 18.6)         | 0.2 (0 to 0.5)                     | 7.9 (1.4 to 19.1)                      | 0.8 (0.2 to 1.9)  | 16.9 (3.2 to 40.3)        | 0.5 (0.1 to 1.3)                   | 17.4 (3.3 to 41.7)                     |
| United States Virgin Islands | All risk factors            | 7.1 (4.3 to 10.6)   | 169.3 (95 to 254.8)       | 8.3 (4.4 to 13.6)                  | 177.6 (100.2 to 268)                   | 7.9 (4.6 to 11.8) | 173.4 (96.3 to 268.1)     | 11.4 (5.9 to 19.2)                 | 184.8 (103.4 to 284.2)                 |
| United States Virgin Islands | Behavioral risks            | 3.9 (2.1 to 5.5)    | 111.1 (57 to 160.2)       | 5.1 (2.5 to 8.3)                   | 116.3 (59.5 to 167.8)                  | 3.8 (2.1 to 5.5)  | 102.1 (51.9 to 150.2)     | 6.4 (3.1 to 10.4)                  | 108.5 (54.8 to 159.9)                  |
| United States Virgin Islands | Alcohol use                 | 1.9 (0 to 3.3)      | 57 (0.5 to 98.8)          | 2.6 (0 to 5)                       | 59.6 (0.5 to 103)                      | 1.9 (0.2 to 3.3)  | 54.5 (5 to 97.4)          | 3.4 (0.3 to 6.5)                   | 57.8 (5.3 to 104.2)                    |
| United States Virgin Islands | Diet high in red meat       | 0.7 (0.2 to 1)      | 19 (4.9 to 28.8)          | 0.9 (0.2 to 1.5)                   | 19.9 (5 to 30.6)                       | 0.7 (0.2 to 1.1)  | 18.7 (5.4 to 29.6)        | 1.2 (0.3 to 2)                     | 19.8 (5.8 to 31.5)                     |
| United States Virgin Islands | Low physical activity       | 0.4 (0.1 to 0.8)    | 8.3 (3.3 to 16.7)         | 0.4 (0.2 to 0.9)                   | 8.7 (3.5 to 17.4)                      | 0.4 (0.2 to 0.8)  | 8.7 (3.2 to 17.4)         | 0.6 (0.2 to 1.3)                   | 9.3 (3.4 to 18.6)                      |
| United States Virgin Islands | Smoking                     | 0.8 (0.5 to 1.1)    | 20.3 (13.1 to 30.1)       | 1 (0.5 to 1.6)                     | 21.3 (13.8 to 31.6)                    | 0.7 (0.5 to 1)    | 16.2 (10.5 to 23.8)       | 1.1 (0.6 to 1.7)                   | 17.3 (11.1 to 25.4)                    |
| United States Virgin Islands | Secondhand smoke            | 0.4 (0.1 to 0.7)    | 12 (2.8 to 21.9)          | 0.5 (0.1 to 1)                     | 12.5 (3 to 22.9)                       | 0.3 (0.1 to 0.6)  | 9.4 (2.2 to 17.8)         | 0.6 (0.1 to 1.1)                   | 9.9 (2.3 to 18.9)                      |
| United States Virgin Islands | Metabolic risks             | 3.6 (1.3 to 6.9)    | 66.8 (10.4 to 141.6)      | 3.6 (0.8 to 7.6)                   | 70.4 (11.1 to 148.1)                   | 4.7 (1.8 to 8.7)  | 82.5 (17.1 to 168.8)      | 5.8 (1.4 to 12.2)                  | 88.3 (19.3 to 181.6)                   |
| United States Virgin Islands | High body-mass index        | 1.6 (0.3 to 3.3)    | 21 (-11.7 to 58.5)        | 1.3 (-0.3 to 3.3)                  | 22.4 (-12.3 to 62.1)                   | 1.9 (0.3 to 3.7)  | 22.6 (-15.5 to 60)        | 1.9 (-0.5 to 4.5)                  | 24.5 (-15.8 to 63.7)                   |
| United States Virgin Islands | High fasting plasma glucose | 2.2 (0.4 to 5.1)    | 49 (9.6 to 114.7)         | 2.5 (0.5 to 6.1)                   | 51.5 (10 to 120.3)                     | 3.1 (0.6 to 6.9)  | 65.3 (13.4 to 147.8)      | 4.4 (0.8 to 10.4)                  | 69.6 (14.4 to 156.6)                   |
| United States of America     | All risk factors            | 9 (7 to 11.3)       | 239.8 (188.8 to 294.7)    | 26.7 (17.7 to 37.3)                | 266.5 (210.1 to 326.9)                 | 6.3 (4.7 to 8.3)  | 150.2 (114 to 193)        | 23.3 (14.4 to 34.4)                | 173.4 (131.6 to 220.7)                 |
| United States of America     | Behavioral risks            | 6.5 (5.5 to 7.4)    | 191.6 (163.4 to 217.8)    | 20.4 (14 to 28.3)                  | 212 (180.6 to 241.9)                   | 4 (3.4 to 4.6)    | 108.1 (91.6 to 124)       | 16 (10.4 to 22.9)                  | 124.1 (104.5 to 143.4)                 |

| Location                           | Risk factor                 | 1990               |                           |                                    |                                        | 2019              |                           |                                    |                                        |
|------------------------------------|-----------------------------|--------------------|---------------------------|------------------------------------|----------------------------------------|-------------------|---------------------------|------------------------------------|----------------------------------------|
|                                    |                             | Deaths             | YLLs (Years of Life Lost) | YLDs (Years Lived with Disability) | DALYs (Disability-Adjusted Life Years) | Deaths            | YLLs (Years of Life Lost) | YLDs (Years Lived with Disability) | DALYs (Disability-Adjusted Life Years) |
| United States of America           | Alcohol use                 | 2.7 (2.2 to 3.2)   | 83 (68.5 to 98.8)         | 8.7 (5.9 to 12.2)                  | 91.7 (75.1 to 109.6)                   | 1.9 (1.5 to 2.3)  | 54.1 (43.5 to 64.7)       | 7.9 (5 to 11.6)                    | 62 (49.8 to 75.5)                      |
| United States of America           | Diet high in red meat       | 1.4 (0.7 to 1.9)   | 40.4 (20.7 to 54.1)       | 4.3 (2.1 to 6.7)                   | 44.7 (22.6 to 60)                      | 0.9 (0.4 to 1.2)  | 23.9 (12.1 to 32.5)       | 3.5 (1.5 to 5.8)                   | 27.4 (13.8 to 37.5)                    |
| United States of America           | Low physical activity       | 0.4 (0.1 to 0.7)   | 8.4 (3.1 to 17.7)         | 1 (0.4 to 2.2)                     | 9.4 (3.4 to 19.7)                      | 0.2 (0.1 to 0.4)  | 4.8 (1.8 to 9.9)          | 0.7 (0.3 to 1.7)                   | 5.6 (2.1 to 11.5)                      |
| United States of America           | Smoking                     | 2.3 (1.6 to 3)     | 67.1 (47.6 to 87)         | 7.2 (4.3 to 10.9)                  | 74.4 (53.2 to 96.1)                    | 1.1 (0.8 to 1.5)  | 29.6 (20.9 to 38.6)       | 4.4 (2.6 to 6.7)                   | 34.1 (24.3 to 44.6)                    |
| United States of America           | Secondhand smoke            | 0.4 (0.1 to 0.7)   | 12.6 (3 to 22.2)          | 1.3 (0.3 to 2.3)                   | 13.9 (3.3 to 24.4)                     | 0.2 (0 to 0.3)    | 5.5 (1.3 to 9.5)          | 0.8 (0.2 to 1.5)                   | 6.2 (1.5 to 10.8)                      |
| United States of America           | Metabolic risks             | 3.1 (1.2 to 5.8)   | 62.7 (13.3 to 125.4)      | 8.1 (2.3 to 16)                    | 70.8 (15.9 to 139.9)                   | 2.9 (1.1 to 5.3)  | 53.9 (12.8 to 105)        | 9.3 (2.8 to 18.4)                  | 63.3 (15.9 to 121.6)                   |
| United States of America           | High body-mass index        | 1.3 (0.2 to 2.8)   | 20 (-7.7 to 51.2)         | 3 (-0.1 to 6.8)                    | 23 (-8.1 to 58.7)                      | 1.2 (0.3 to 2.5)  | 17.5 (-5.2 to 41.9)       | 3.5 (0 to 7.9)                     | 20.9 (-5 to 48.9)                      |
| United States of America           | High fasting plasma glucose | 1.9 (0.4 to 4.3)   | 45.7 (8.7 to 101.8)       | 5.4 (1 to 12.9)                    | 51.1 (9.6 to 114.4)                    | 1.9 (0.4 to 4)    | 39.8 (7.9 to 85.2)        | 6.4 (1.2 to 15)                    | 46.2 (9.1 to 100.2)                    |
| Uruguay                            | All risk factors            | 10.8 (8.7 to 12.9) | 288.2 (235.3 to 339.4)    | 13.1 (8.8 to 18.4)                 | 301.4 (247 to 353.8)                   | 9.2 (7.2 to 11.6) | 222.1 (175.3 to 274.8)    | 15.2 (9.4 to 23.2)                 | 237.3 (187 to 293.4)                   |
| Uruguay                            | Behavioral risks            | 9 (7.4 to 10.5)    | 255.9 (212.1 to 299.7)    | 11.5 (7.5 to 16)                   | 267.4 (221.2 to 313.1)                 | 6.8 (5.6 to 8)    | 180.2 (150 to 212.8)      | 12.2 (7.5 to 18)                   | 192.3 (160.1 to 226.9)                 |
| Uruguay                            | Alcohol use                 | 3.8 (3.1 to 4.7)   | 110.6 (89.3 to 134.4)     | 4.9 (3.2 to 7.1)                   | 115.6 (93.3 to 140.5)                  | 3 (2.3 to 3.8)    | 81.4 (63.7 to 101)        | 5.5 (3.3 to 8.3)                   | 86.9 (67.9 to 108.1)                   |
| Uruguay                            | Diet high in red meat       | 2.4 (1.1 to 3.3)   | 66.3 (32 to 95.1)         | 3 (1.4 to 4.9)                     | 69.3 (33.6 to 99.8)                    | 1.7 (0.8 to 2.4)  | 44.5 (22.1 to 62.5)       | 3 (1.3 to 5.1)                     | 47.5 (23.1 to 67.4)                    |
| Uruguay                            | Low physical activity       | 0.2 (0.1 to 0.5)   | 5.5 (2.9 to 11.4)         | 0.3 (0.1 to 0.6)                   | 5.8 (3.1 to 11.9)                      | 0.2 (0.1 to 0.5)  | 5.2 (2.4 to 10.6)         | 0.4 (0.2 to 0.8)                   | 5.6 (2.6 to 11.3)                      |
| Uruguay                            | Smoking                     | 2.4 (1.6 to 3.2)   | 69.1 (44.4 to 94.8)       | 3.1 (1.7 to 4.8)                   | 72.1 (46.3 to 99.2)                    | 1.8 (1.2 to 2.4)  | 49.3 (33.5 to 67.3)       | 3.3 (1.8 to 5.4)                   | 52.7 (35.7 to 71.9)                    |
| Uruguay                            | Secondhand smoke            | 1.1 (0.3 to 1.9)   | 30.6 (7.4 to 52)          | 1.4 (0.3 to 2.6)                   | 32 (7.8 to 54.5)                       | 0.7 (0.2 to 1.2)  | 17.4 (4.1 to 30.3)        | 1.2 (0.3 to 2.3)                   | 18.6 (4.4 to 32.7)                     |
| Uruguay                            | Metabolic risks             | 2.3 (0.8 to 4.3)   | 42.8 (8.3 to 86.5)        | 2.2 (0.6 to 4.3)                   | 45 (9.1 to 90.5)                       | 3.1 (1.2 to 5.8)  | 55.3 (13.6 to 111.4)      | 4 (1 to 8.3)                       | 59.3 (15 to 117.9)                     |
| Uruguay                            | High body-mass index        | 1.4 (0.3 to 3)     | 23.6 (-3.6 to 57.6)       | 1.2 (0 to 2.8)                     | 24.8 (-3.4 to 60.3)                    | 1.6 (0.4 to 3.3)  | 24.6 (-3.4 to 58.4)       | 1.8 (-0.1 to 4.4)                  | 26.4 (-3.4 to 63.1)                    |
| Uruguay                            | High fasting plasma glucose | 0.9 (0.2 to 2.1)   | 20.3 (3.5 to 47)          | 1 (0.2 to 2.5)                     | 21.3 (3.7 to 49.3)                     | 1.6 (0.3 to 3.7)  | 33 (6.2 to 77)            | 2.4 (0.4 to 6)                     | 35.4 (6.6 to 82.7)                     |
| Uzbekistan                         | All risk factors            | 1.9 (1.2 to 2.6)   | 50.8 (31.2 to 71.2)       | 2.1 (1.1 to 3.2)                   | 52.9 (32.3 to 73.9)                    | 3.3 (2 to 5)      | 84.5 (48.1 to 131.2)      | 4.1 (2.1 to 6.9)                   | 88.6 (50.6 to 137.2)                   |
| Uzbekistan                         | Behavioral risks            | 1.2 (0.8 to 1.5)   | 39.4 (25.8 to 51)         | 1.5 (0.8 to 2.2)                   | 40.8 (26.7 to 52.9)                    | 1.7 (1.1 to 2.2)  | 52.3 (34.7 to 71.9)       | 2.5 (1.4 to 3.8)                   | 54.8 (36.7 to 74.5)                    |
| Uzbekistan                         | Alcohol use                 | 0.3 (0.1 to 0.4)   | 9.3 (5.5 to 13.7)         | 0.3 (0.2 to 0.6)                   | 9.7 (5.7 to 14.1)                      | 0.4 (0.3 to 0.6)  | 14.7 (9.1 to 21.4)        | 0.7 (0.4 to 1.1)                   | 15.4 (9.7 to 22.4)                     |
| Uzbekistan                         | Diet high in red meat       | 0.5 (0.2 to 0.6)   | 16 (6 to 21.1)            | 0.6 (0.2 to 1)                     | 16.6 (6.3 to 21.9)                     | 0.7 (0.3 to 1)    | 21.7 (9 to 31.6)          | 1 (0.4 to 1.7)                     | 22.7 (9.3 to 32.8)                     |
| Uzbekistan                         | Low physical activity       | 0.1 (0.1 to 0.2)   | 2.1 (1.4 to 4.2)          | 0.1 (0.1 to 0.2)                   | 2.2 (1.5 to 4.3)                       | 0.1 (0.1 to 0.2)  | 2.9 (1.7 to 5.5)          | 0.1 (0.1 to 0.3)                   | 3 (1.8 to 5.7)                         |
| Uzbekistan                         | Smoking                     | 0.1 (0 to 0.1)     | 2.1 (1.2 to 3.5)          | 0.1 (0 to 0.1)                     | 2.2 (1.2 to 3.6)                       | 0.1 (0.1 to 0.1)  | 2.7 (1.4 to 4.5)          | 0.1 (0.1 to 0.2)                   | 2.8 (1.4 to 4.7)                       |
| Uzbekistan                         | Secondhand smoke            | 0.3 (0.1 to 0.6)   | 11.1 (2.7 to 19.4)        | 0.4 (0.1 to 0.8)                   | 11.6 (2.8 to 20.3)                     | 0.4 (0.1 to 0.7)  | 12.4 (3 to 21.9)          | 0.6 (0.1 to 1.1)                   | 13 (3.1 to 23)                         |
| Uzbekistan                         | Metabolic risks             | 0.7 (0.2 to 1.5)   | 12.4 (-4 to 31.4)         | 0.6 (0 to 1.4)                     | 13 (-4 to 33.1)                        | 1.8 (0.6 to 3.5)  | 35.2 (2.3 to 78.9)        | 1.8 (0.1 to 4.1)                   | 37 (2.6 to 83.2)                       |
| Uzbekistan                         | High body-mass index        | 0.4 (-0.1 to 0.9)  | 2.5 (-9.9 to 14.9)        | 0.2 (-0.3 to 0.8)                  | 2.8 (-10.2 to 15.4)                    | 0.7 (0 to 1.6)    | 6.9 (-13.1 to 26.7)       | 0.4 (-0.6 to 1.4)                  | 7.3 (-13.6 to 28.2)                    |
| Uzbekistan                         | High fasting plasma glucose | 0.4 (0.1 to 0.9)   | 10.2 (1.8 to 24.1)        | 0.4 (0.1 to 1.1)                   | 10.6 (1.9 to 25.1)                     | 1.2 (0.2 to 2.7)  | 30 (5.4 to 68.8)          | 1.5 (0.3 to 3.6)                   | 31.5 (5.6 to 71.9)                     |
| Vanuatu                            | All risk factors            | 4.7 (2.3 to 7.6)   | 124.4 (62.4 to 201)       | 3.5 (1.7 to 6)                     | 127.8 (64.3 to 206.4)                  | 8.9 (4.1 to 15.1) | 236.7 (113.8 to 400.4)    | 6.6 (3.1 to 11.4)                  | 243.3 (117 to 410.6)                   |
| Vanuatu                            | Behavioral risks            | 1.6 (0.9 to 2.5)   | 47.9 (24.9 to 75.2)       | 1.3 (0.6 to 2.1)                   | 49.1 (25.5 to 77.2)                    | 2.4 (1.3 to 3.8)  | 71.5 (37.3 to 118.2)      | 1.9 (0.9 to 3.3)                   | 73.4 (38.2 to 120.9)                   |
| Vanuatu                            | Alcohol use                 | 0.1 (0 to 0.1)     | 2.4 (1.1 to 4.2)          | 0.1 (0 to 0.1)                     | 2.4 (1.2 to 4.3)                       | 0.1 (0 to 0.2)    | 3.8 (1.6 to 7.2)          | 0.1 (0 to 0.2)                     | 3.9 (1.7 to 7.4)                       |
| Vanuatu                            | Diet high in red meat       | 0.6 (0.2 to 1)     | 19.4 (6.4 to 32.1)        | 0.5 (0.2 to 0.9)                   | 19.9 (6.6 to 32.9)                     | 0.9 (0.3 to 1.6)  | 29.1 (10.8 to 51)         | 0.8 (0.3 to 1.4)                   | 29.9 (11.1 to 52.2)                    |
| Vanuatu                            | Low physical activity       | 0.2 (0.1 to 0.3)   | 3.9 (1.7 to 8.2)          | 0.1 (0 to 0.2)                     | 4 (1.8 to 8.4)                         | 0.3 (0.1 to 0.6)  | 6.4 (2.7 to 13)           | 0.2 (0.1 to 0.4)                   | 6.6 (2.8 to 13.3)                      |
| Vanuatu                            | Smoking                     | 0.2 (0.1 to 0.3)   | 4.9 (2.2 to 8.3)          | 0.1 (0.1 to 0.3)                   | 5 (2.3 to 8.5)                         | 0.2 (0.1 to 0.4)  | 5.3 (2.6 to 9.1)          | 0.2 (0.1 to 0.3)                   | 5.5 (2.6 to 9.4)                       |
| Vanuatu                            | Secondhand smoke            | 0.6 (0.1 to 1.1)   | 19 (4.5 to 36.3)          | 0.5 (0.1 to 1)                     | 19.5 (4.6 to 37.4)                     | 0.9 (0.2 to 1.8)  | 29.1 (6.1 to 59.2)        | 0.8 (0.2 to 1.6)                   | 29.8 (6.2 to 60.7)                     |
| Vanuatu                            | Metabolic risks             | 3.4 (1.2 to 6.3)   | 84.8 (32.1 to 159.1)      | 2.4 (0.9 to 4.7)                   | 87.3 (33.2 to 162.9)                   | 7.1 (2.6 to 13.3) | 181.2 (67.5 to 344)       | 5.1 (1.9 to 9.5)                   | 186.3 (70 to 352.9)                    |
| Vanuatu                            | High body-mass index        | 2.5 (0.8 to 5.1)   | 61.4 (19 to 128.6)        | 1.8 (0.5 to 3.8)                   | 63.2 (19.5 to 132.5)                   | 4.6 (1.3 to 9)    | 116 (34 to 226)           | 3.3 (0.9 to 6.5)                   | 119.2 (34.8 to 231.5)                  |
| Vanuatu                            | High fasting plasma glucose | 1.1 (0.2 to 2.8)   | 27.8 (4.6 to 70.6)        | 0.8 (0.1 to 2.1)                   | 28.6 (4.7 to 72.7)                     | 3.1 (0.6 to 7.7)  | 80 (16.3 to 202.8)        | 2.2 (0.4 to 5.7)                   | 82.3 (16.7 to 207.6)                   |
| Venezuela (Bolivarian Republic of) | All risk factors            | 3.4 (2.3 to 4.6)   | 89.2 (63 to 119.3)        | 3.7 (2.3 to 5.3)                   | 92.8 (65.2 to 124)                     | 4.2 (2.5 to 6.7)  | 104 (59.9 to 169.6)       | 6.8 (3.7 to 11.7)                  | 110.8 (64 to 179.1)                    |

| Location                           | Risk factor                 | 1990             |                           |                                    |                                        | 2019              |                           |                                    |                                        |
|------------------------------------|-----------------------------|------------------|---------------------------|------------------------------------|----------------------------------------|-------------------|---------------------------|------------------------------------|----------------------------------------|
|                                    |                             | Deaths           | YLLs (Years of Life Lost) | YLDs (Years Lived with Disability) | DALYs (Disability-Adjusted Life Years) | Deaths            | YLLs (Years of Life Lost) | YLDs (Years Lived with Disability) | DALYs (Disability-Adjusted Life Years) |
| Venezuela (Bolivarian Republic of) | Behavioral risks            | 2.2 (1.7 to 2.6) | 67 (52.7 to 80.7)         | 2.6 (1.7 to 3.7)                   | 69.6 (54.9 to 83.8)                    | 2.1 (1.4 to 3)    | 64 (42.4 to 90.7)         | 4 (2.4 to 6.1)                     | 67.9 (45 to 96.3)                      |
| Venezuela (Bolivarian Republic of) | Alcohol use                 | 0.8 (0.6 to 1.1) | 28.1 (21.9 to 35.6)       | 1.1 (0.7 to 1.5)                   | 29.2 (22.7 to 37)                      | 0.8 (0.5 to 1.1)  | 25.3 (16.6 to 37)         | 1.5 (0.9 to 2.4)                   | 26.8 (17.6 to 39.1)                    |
| Venezuela (Bolivarian Republic of) | Diet high in red meat       | 0.4 (0.1 to 0.5) | 12.3 (3.8 to 16.2)        | 0.5 (0.1 to 0.7)                   | 12.8 (3.9 to 16.9)                     | 0.5 (0.2 to 0.8)  | 16.1 (5 to 25.6)          | 1 (0.3 to 1.7)                     | 17.1 (5.3 to 27.1)                     |
| Venezuela (Bolivarian Republic of) | Low physical activity       | 0.1 (0 to 0.2)   | 1.9 (1.1 to 4.2)          | 0.1 (0 to 0.2)                     | 2 (1.2 to 4.3)                         | 0.1 (0 to 0.2)    | 2.4 (1.2 to 5.2)          | 0.2 (0.1 to 0.3)                   | 2.6 (1.3 to 5.5)                       |
| Venezuela (Bolivarian Republic of) | Smoking                     | 0.7 (0.4 to 0.9) | 17.7 (10.5 to 25.3)       | 0.7 (0.4 to 1.2)                   | 18.4 (10.9 to 26.4)                    | 0.5 (0.3 to 0.7)  | 12 (6.5 to 19.3)          | 0.8 (0.4 to 1.3)                   | 12.7 (6.9 to 20.5)                     |
| Venezuela (Bolivarian Republic of) | Secondhand smoke            | 0.4 (0.1 to 0.6) | 11.2 (2.6 to 19.2)        | 0.4 (0.1 to 0.8)                   | 11.6 (2.7 to 20)                       | 0.4 (0.1 to 0.7)  | 11.4 (2.6 to 21.7)        | 0.7 (0.2 to 1.4)                   | 12.1 (2.7 to 23)                       |
| Venezuela (Bolivarian Republic of) | Metabolic risks             | 1.4 (0.4 to 2.7) | 26.3 (3.1 to 57.7)        | 1.2 (0.2 to 2.7)                   | 27.5 (3.3 to 60.1)                     | 2.3 (0.7 to 4.7)  | 45.6 (6.9 to 105.5)       | 3.2 (0.7 to 7.4)                   | 48.8 (7.6 to 111.5)                    |
| Venezuela (Bolivarian Republic of) | High body-mass index        | 0.4 (0 to 1)     | 4.2 (-8.2 to 16.8)        | 0.3 (-0.2 to 0.9)                  | 4.5 (-8.4 to 17.7)                     | 0.7 (0 to 1.7)    | 8.7 (-10.4 to 29.1)       | 0.8 (-0.4 to 2.3)                  | 9.4 (-10.6 to 31.5)                    |
| Venezuela (Bolivarian Republic of) | High fasting plasma glucose | 1 (0.2 to 2.3)   | 23.1 (4.5 to 52.5)        | 1 (0.2 to 2.4)                     | 24.1 (4.7 to 54.8)                     | 1.7 (0.3 to 4.1)  | 39.1 (7.7 to 96.2)        | 2.6 (0.5 to 6.5)                   | 41.7 (8.2 to 102.7)                    |
| Viet Nam                           | All risk factors            | 2.5 (1.3 to 4.1) | 70.3 (37.2 to 113.4)      | 2.1 (1 to 3.4)                     | 72.4 (38.3 to 116.5)                   | 5.2 (2.9 to 7.9)  | 136.6 (78.4 to 207.3)     | 6.8 (3.6 to 11.1)                  | 143.5 (82 to 216.8)                    |
| Viet Nam                           | Behavioral risks            | 1.4 (0.7 to 2.1) | 41.9 (20.9 to 65.7)       | 1.2 (0.5 to 2)                     | 43.1 (21.3 to 67.5)                    | 2.3 (1.4 to 3.4)  | 70.4 (42.4 to 104)        | 3.5 (1.9 to 5.7)                   | 73.9 (44.4 to 108.8)                   |
| Viet Nam                           | Alcohol use                 | 0 (0 to 0.1)     | 1.5 (0.5 to 2.7)          | 0 (0 to 0.1)                       | 1.5 (0.5 to 2.8)                       | 0.5 (0.3 to 0.7)  | 15.8 (10.3 to 23.4)       | 0.8 (0.4 to 1.3)                   | 16.6 (10.8 to 24.5)                    |
| Viet Nam                           | Diet high in red meat       | 0.3 (0.1 to 0.5) | 10.1 (1.9 to 15.7)        | 0.3 (0.1 to 0.5)                   | 10.4 (2 to 16.1)                       | 0.8 (0.3 to 1.2)  | 23.2 (7.8 to 36.5)        | 1.2 (0.4 to 2)                     | 24.4 (8.2 to 38.3)                     |
| Viet Nam                           | Low physical activity       | 0.1 (0.1 to 0.2) | 2.4 (1.4 to 5.1)          | 0.1 (0 to 0.2)                     | 2.4 (1.4 to 5.2)                       | 0.1 (0.1 to 0.3)  | 2.9 (1.7 to 6.6)          | 0.1 (0.1 to 0.3)                   | 3.1 (1.8 to 6.9)                       |
| Viet Nam                           | Smoking                     | 0.1 (0.1 to 0.2) | 2.9 (1.4 to 4.8)          | 0.1 (0 to 0.2)                     | 3 (1.5 to 4.9)                         | 0.2 (0.1 to 0.3)  | 3.5 (1.8 to 5.7)          | 0.2 (0.1 to 0.3)                   | 3.6 (1.9 to 6)                         |
| Viet Nam                           | Secondhand smoke            | 0.8 (0.2 to 1.5) | 26.1 (5.7 to 48)          | 0.7 (0.2 to 1.4)                   | 26.8 (5.9 to 49.4)                     | 0.9 (0.2 to 1.7)  | 28 (6.2 to 51.8)          | 1.4 (0.3 to 2.7)                   | 29.4 (6.5 to 54.2)                     |
| Viet Nam                           | Metabolic risks             | 1.2 (0.4 to 2.5) | 30.7 (9.1 to 63.1)        | 0.9 (0.3 to 2)                     | 31.7 (9.4 to 65.1)                     | 3.2 (1.2 to 5.8)  | 74.5 (26.5 to 136.7)      | 3.7 (1.3 to 7.1)                   | 78.2 (27.8 to 143.5)                   |
| Viet Nam                           | High body-mass index        | 0.5 (0.1 to 1.5) | 14.2 (2.5 to 38.5)        | 0.4 (0.1 to 1.1)                   | 14.6 (2.5 to 39.6)                     | 1.8 (0.4 to 4)    | 45.1 (11.1 to 100.2)      | 2.2 (0.5 to 4.8)                   | 47.3 (11.6 to 104.6)                   |
| Viet Nam                           | High fasting plasma glucose | 0.7 (0.1 to 1.7) | 17.2 (3.1 to 40.6)        | 0.5 (0.1 to 1.3)                   | 17.7 (3.1 to 42)                       | 1.5 (0.3 to 3.5)  | 32.5 (5.8 to 77.4)        | 1.7 (0.3 to 4.1)                   | 34.2 (6.1 to 81.2)                     |
| Yemen                              | All risk factors            | 1.2 (0.6 to 2.3) | 33.6 (16.6 to 64.3)       | 1 (0.5 to 1.8)                     | 34.6 (17.1 to 66.3)                    | 2.1 (1.1 to 3.5)  | 55.7 (28.5 to 96.8)       | 1.9 (1 to 3.4)                     | 57.6 (29.5 to 99.4)                    |
| Yemen                              | Behavioral risks            | 0.8 (0.4 to 1.4) | 24.5 (13 to 43)           | 0.7 (0.3 to 1.2)                   | 25.2 (13.3 to 44)                      | 1.1 (0.7 to 1.7)  | 34.7 (20.5 to 52.7)       | 1.1 (0.6 to 1.9)                   | 35.9 (21.2 to 54.6)                    |
| Yemen                              | Alcohol use                 | 0.1 (0 to 0.1)   | 2.1 (1.1 to 3.8)          | 0.1 (0 to 0.1)                     | 2.2 (1.1 to 3.9)                       | 0 (0 to 0.1)      | 1.4 (0.8 to 2.3)          | 0 (0 to 0.1)                       | 1.4 (0.9 to 2.4)                       |
| Yemen                              | Diet high in red meat       | 0.1 (0 to 0.2)   | 3.8 (0.7 to 7.3)          | 0.1 (0 to 0.2)                     | 3.9 (0.7 to 7.5)                       | 0.2 (0 to 0.3)    | 5.9 (1.1 to 10.1)         | 0.2 (0 to 0.3)                     | 6.1 (1.1 to 10.5)                      |
| Yemen                              | Low physical activity       | 0.1 (0 to 0.3)   | 3.8 (1.3 to 8.1)          | 0.1 (0 to 0.3)                     | 3.9 (1.3 to 8.3)                       | 0.2 (0.1 to 0.4)  | 5.7 (2.2 to 11.3)         | 0.2 (0.1 to 0.4)                   | 5.9 (2.3 to 11.6)                      |
| Yemen                              | Smoking                     | 0.2 (0.1 to 0.4) | 6.7 (3 to 13)             | 0.2 (0.1 to 0.4)                   | 6.9 (3 to 13.3)                        | 0.3 (0.2 to 0.5)  | 9.7 (5.7 to 15.4)         | 0.3 (0.2 to 0.5)                   | 10 (5.9 to 15.8)                       |
| Yemen                              | Secondhand smoke            | 0.3 (0.1 to 0.6) | 8.9 (2 to 18.4)           | 0.2 (0.1 to 0.5)                   | 9.1 (2 to 18.8)                        | 0.4 (0.1 to 0.8)  | 13.1 (2.9 to 25)          | 0.4 (0.1 to 0.8)                   | 13.5 (3 to 25.8)                       |
| Yemen                              | Metabolic risks             | 0.4 (0.1 to 1.2) | 10 (0.5 to 28.5)          | 0.3 (0.1 to 0.9)                   | 10.4 (0.5 to 29.5)                     | 1.1 (0.2 to 2.3)  | 23.2 (0.4 to 55.6)        | 0.8 (0.1 to 2)                     | 24.1 (0.5 to 57.2)                     |
| Yemen                              | High body-mass index        | 0.1 (0 to 0.3)   | 1.1 (-3.7 to 6)           | 0.1 (-0.1 to 0.2)                  | 1.1 (-3.7 to 6.2)                      | 0.2 (-0.1 to 0.6) | 1.2 (-8.6 to 10.7)        | 0.1 (-0.3 to 0.4)                  | 1.3 (-8.8 to 11)                       |
| Yemen                              | High fasting plasma glucose | 0.3 (0 to 1)     | 9.2 (1.3 to 26.5)         | 0.3 (0 to 0.8)                     | 9.4 (1.4 to 27.4)                      | 0.9 (0.2 to 2.1)  | 22.6 (4.3 to 56.3)        | 0.8 (0.1 to 2)                     | 23.4 (4.4 to 58.1)                     |
| Zambia                             | All risk factors            | 2.7 (1.7 to 4.1) | 70.2 (43.7 to 104.1)      | 1.6 (0.9 to 2.6)                   | 71.9 (44.6 to 106.1)                   | 3.4 (2.1 to 5.1)  | 81.1 (49.5 to 126.5)      | 2.4 (1.3 to 3.9)                   | 83.5 (50.7 to 130.1)                   |
| Zambia                             | Behavioral risks            | 1.9 (1.3 to 2.7) | 55.6 (36.3 to 78.7)       | 1.2 (0.7 to 1.9)                   | 56.8 (37.1 to 80.3)                    | 2.1 (1.5 to 3)    | 57.9 (37.9 to 84.4)       | 1.6 (1 to 2.6)                     | 59.6 (39 to 86.6)                      |
| Zambia                             | Alcohol use                 | 0.9 (0.6 to 1.3) | 28.1 (18.8 to 40.3)       | 0.6 (0.4 to 0.9)                   | 28.7 (19.1 to 41.2)                    | 1 (0.6 to 1.5)    | 28.8 (17.9 to 43)         | 0.8 (0.4 to 1.3)                   | 29.6 (18.4 to 44.3)                    |
| Zambia                             | Diet high in red meat       | 0.3 (0 to 0.4)   | 8.1 (1.4 to 12.8)         | 0.2 (0 to 0.3)                     | 8.2 (1.4 to 13.1)                      | 0.3 (0.1 to 0.5)  | 8.7 (1.6 to 14.4)         | 0.2 (0 to 0.4)                     | 9 (1.7 to 14.7)                        |
| Zambia                             | Low physical activity       | 0.1 (0.1 to 0.2) | 3 (1.7 to 5.7)            | 0.1 (0 to 0.1)                     | 3 (1.7 to 5.8)                         | 0.1 (0.1 to 0.3)  | 3.3 (1.8 to 6.3)          | 0.1 (0 to 0.2)                     | 3.4 (1.9 to 6.5)                       |
| Zambia                             | Smoking                     | 0.3 (0.1 to 0.4) | 4.4 (2.1 to 7.5)          | 0.1 (0.1 to 0.2)                   | 4.5 (2.1 to 7.7)                       | 0.3 (0.2 to 0.5)  | 5 (2.4 to 8.2)            | 0.2 (0.1 to 0.3)                   | 5.1 (2.5 to 8.5)                       |
| Zambia                             | Secondhand smoke            | 0.4 (0.1 to 0.8) | 14.1 (2.9 to 26.1)        | 0.3 (0.1 to 0.6)                   | 14.4 (3 to 26.6)                       | 0.5 (0.1 to 0.9)  | 14.3 (3.1 to 26.8)        | 0.4 (0.1 to 0.8)                   | 14.7 (3.2 to 27.7)                     |
| Zambia                             | Metabolic risks             | 0.9 (0.2 to 1.9) | 16.4 (-0.7 to 40.7)       | 0.5 (0.1 to 1.1)                   | 16.8 (-0.6 to 41.8)                    | 1.4 (0.4 to 3)    | 26 (2.4 to 60.5)          | 0.8 (0.1 to 1.9)                   | 26.8 (2.6 to 62.2)                     |
| Zambia                             | High body-mass index        | 0.2 (0 to 0.6)   | 0.9 (-7.5 to 8.7)         | 0.1 (-0.1 to 0.3)                  | 0.9 (-7.6 to 9)                        | 0.5 (0 to 1.2)    | 6.3 (-8.4 to 21.7)        | 0.2 (-0.2 to 0.7)                  | 6.5 (-8.5 to 22.4)                     |
| Zambia                             | High fasting plasma glucose | 0.7 (0.1 to 1.6) | 15.8 (2.8 to 37.3)        | 0.4 (0.1 to 1)                     | 16.2 (2.8 to 38.2)                     | 0.9 (0.2 to 2.3)  | 20.5 (3.6 to 51.3)        | 0.6 (0.1 to 1.6)                   | 21.1 (3.7 to 53)                       |
| Zimbabwe                           | All risk factors            | 3 (1.8 to 4.6)   | 71.5 (43.3 to 106.4)      | 2.2 (1.2 to 3.5)                   | 73.6 (44.5 to 109)                     | 5.2 (2.7 to 8.8)  | 123.3 (61.5 to 212.3)     | 3.6 (1.7 to 6.4)                   | 126.9 (63.2 to 218.7)                  |
| Zimbabwe                           | Behavioral risks            | 1.6 (1.1 to 2.2) | 45.8 (30.3 to 61.5)       | 1.3 (0.8 to 2)                     | 47.1 (31.2 to 63.4)                    | 2.3 (1.4 to 3.4)  | 66.6 (39.3 to 99.8)       | 1.8 (1 to 2.9)                     | 68.4 (40.2 to 102.5)                   |

| Location | Risk factor                 | 1990             |                           |                                    |                                        | 2019             |                           |                                    |                                        |
|----------|-----------------------------|------------------|---------------------------|------------------------------------|----------------------------------------|------------------|---------------------------|------------------------------------|----------------------------------------|
|          |                             | Deaths           | YLLs (Years of Life Lost) | YLDs (Years Lived with Disability) | DALYs (Disability-Adjusted Life Years) | Deaths           | YLLs (Years of Life Lost) | YLDs (Years Lived with Disability) | DALYs (Disability-Adjusted Life Years) |
| Zimbabwe | Alcohol use                 | 0.6 (0.4 to 0.8) | 18.3 (11.7 to 25.7)       | 0.5 (0.3 to 0.8)                   | 18.8 (12.1 to 26.4)                    | 0.8 (0.4 to 1.2) | 24.3 (13.7 to 38.2)       | 0.6 (0.3 to 1.1)                   | 25 (14 to 39.3)                        |
| Zimbabwe | Diet high in red meat       | 0.3 (0 to 0.4)   | 7.5 (1.4 to 11.2)         | 0.2 (0 to 0.4)                     | 7.7 (1.4 to 11.5)                      | 0.4 (0.1 to 0.7) | 12.7 (2.3 to 21.7)        | 0.3 (0.1 to 0.6)                   | 13 (2.4 to 22.3)                       |
| Zimbabwe | Low physical activity       | 0.1 (0.1 to 0.2) | 2.2 (1.4 to 5.1)          | 0.1 (0 to 0.1)                     | 2.3 (1.4 to 5.2)                       | 0.2 (0.1 to 0.3) | 3.6 (2 to 7.6)            | 0.1 (0.1 to 0.2)                   | 3.7 (2.1 to 7.8)                       |
| Zimbabwe | Smoking                     | 0.3 (0.2 to 0.5) | 6.1 (3.6 to 9.5)          | 0.2 (0.1 to 0.3)                   | 6.3 (3.8 to 9.8)                       | 0.4 (0.2 to 0.6) | 7.3 (4.1 to 12)           | 0.2 (0.1 to 0.4)                   | 7.5 (4.2 to 12.3)                      |
| Zimbabwe | Secondhand smoke            | 0.4 (0.1 to 0.8) | 13.3 (3 to 23.5)          | 0.4 (0.1 to 0.7)                   | 13.7 (3.1 to 24.2)                     | 0.7 (0.1 to 1.2) | 21 (4.3 to 39.5)          | 0.6 (0.1 to 1.1)                   | 21.5 (4.5 to 40.5)                     |
| Zimbabwe | Metabolic risks             | 1.5 (0.5 to 3.1) | 28.3 (3.3 to 62.7)        | 0.9 (0.2 to 2.1)                   | 29.3 (3.5 to 65)                       | 3.2 (1 to 6.6)   | 62 (8.6 to 145.3)         | 1.9 (0.4 to 4.5)                   | 63.9 (9 to 150)                        |
| Zimbabwe | High body-mass index        | 0.5 (0 to 1.2)   | 6.6 (-7.1 to 22.9)        | 0.3 (-0.1 to 0.7)                  | 6.9 (-7.1 to 23.7)                     | 0.9 (0 to 2)     | 9 (-15.5 to 35.7)         | 0.4 (-0.3 to 1.2)                  | 9.4 (-15.7 to 36.8)                    |
| Zimbabwe | High fasting plasma glucose | 1.1 (0.2 to 2.5) | 22.7 (4.1 to 53.2)        | 0.7 (0.1 to 1.7)                   | 23.4 (4.2 to 54.8)                     | 2.4 (0.5 to 5.8) | 55.7 (10.4 to 135.3)      | 1.6 (0.3 to 4.1)                   | 57.4 (10.7 to 139)                     |

Supplementary table 3. The global, regional, SDI quintiles, and national age-standardized estimates of QCI by sex and rQCI for females, in 1990 and 2019.

| Scale                | Location                         | 1990   |      |        |      | 2019   |      |        |      |
|----------------------|----------------------------------|--------|------|--------|------|--------|------|--------|------|
|                      |                                  | QCI    |      | rQCI   |      | QCI    |      | rQCI   |      |
|                      |                                  | Female | Male | Female | Male | Female | Male | Female | Male |
| <b>Global</b>        | Global                           | 72.9   | 56.3 | 73.9   | NA   | 78.7   | 69.9 | 82.2   | NA   |
| <b>WHO regions</b>   | African Region                   | 19.0   | 15.9 | 22.2   | NA   | 32.1   | 31.8 | 37.8   | NA   |
|                      | Eastern Mediterranean Region     | 33.9   | 20.5 | 30.4   | NA   | 52.1   | 40.4 | 54.7   | NA   |
|                      | European Region                  | 78.6   | 75.9 | 75.7   | NA   | 88.9   | 85.7 | 87.8   | NA   |
|                      | Region of the Americas           | 83.6   | 87.6 | 82.7   | NA   | 88.1   | 87.5 | 87.3   | NA   |
|                      | South-East Asia Region           | 28.6   | 23.3 | 24.3   | NA   | 48.3   | 48.0 | 48.2   | NA   |
|                      | Western Pacific Region           | 71.5   | 51.0 | 69.2   | NA   | 85.2   | 72.8 | 86.1   | NA   |
| <b>SDI quintiles</b> | High SDI                         | 87.2   | 89.9 | 84.0   | NA   | 95.7   | 94.3 | 92.7   | NA   |
|                      | High-middle SDI                  | 71.2   | 66.4 | 68.3   | NA   | 82.9   | 78.1 | 83.2   | NA   |
|                      | Low SDI                          | 13.9   | 11.0 | 12.0   | NA   | 27.3   | 24.4 | 28.4   | NA   |
|                      | Low-middle SDI                   | 27.4   | 19.5 | 25.8   | NA   | 45.5   | 42.8 | 48.3   | NA   |
|                      | Middle SDI                       | 48.3   | 33.6 | 45.4   | NA   | 69.7   | 64.5 | 71.5   | NA   |
| <b>Countries</b>     | Afghanistan                      | 17.8   | 13.6 | 10.0   | NA   | 22.9   | 26.9 | 19.6   | NA   |
|                      | Albania                          | 73.8   | 63.8 | 62.0   | NA   | 82.8   | 76.4 | 80.1   | NA   |
|                      | Algeria                          | 55.0   | 29.7 | 49.9   | NA   | 70.5   | 57.5 | 69.2   | NA   |
|                      | American Samoa                   | 46.6   | 54.3 | 42.5   | NA   | 51.0   | 53.8 | 51.0   | NA   |
|                      | Andorra                          | 91.1   | 77.7 | 84.8   | NA   | 97.1   | 88.7 | 92.9   | NA   |
|                      | Angola                           | 8.1    | 12.7 | 5.5    | NA   | 22.1   | 26.3 | 24.4   | NA   |
|                      | Antigua and Barbuda              | 61.2   | 42.8 | 60.8   | NA   | 68.8   | 54.9 | 72.8   | NA   |
|                      | Argentina                        | 55.3   | 47.9 | 54.0   | NA   | 70.8   | 64.5 | 72.2   | NA   |
|                      | Armenia                          | 56.0   | 74.9 | 52.4   | NA   | 75.3   | 65.5 | 73.0   | NA   |
|                      | Australia                        | 88.1   | 90.7 | 83.3   | NA   | 97.3   | 96.2 | 93.5   | NA   |
|                      | Austria                          | 86.0   | 82.4 | 82.1   | NA   | 94.1   | 89.3 | 91.1   | NA   |
|                      | Azerbaijan                       | 50.8   | 71.9 | 45.1   | NA   | 62.9   | 60.8 | 61.4   | NA   |
|                      | Bahamas                          | 56.7   | 39.7 | 56.5   | NA   | 66.3   | 50.0 | 67.3   | NA   |
|                      | Bahrain                          | 48.8   | 62.1 | 48.3   | NA   | 73.2   | 72.3 | 76.4   | NA   |
|                      | Bangladesh                       | 17.2   | 9.9  | 12.5   | NA   | 46.3   | 38.2 | 45.6   | NA   |
|                      | Barbados                         | 61.0   | 44.8 | 62.0   | NA   | 70.9   | 56.9 | 74.2   | NA   |
|                      | Belarus                          | 71.5   | 66.1 | 65.7   | NA   | 83.6   | 75.5 | 82.3   | NA   |
|                      | Belgium                          | 81.9   | 81.2 | 80.0   | NA   | 94.7   | 90.0 | 91.6   | NA   |
|                      | Belize                           | 55.2   | 36.2 | 52.6   | NA   | 61.6   | 45.1 | 61.4   | NA   |
|                      | Benin                            | 16.4   | 17.0 | 14.8   | NA   | 25.3   | 24.3 | 27.0   | NA   |
|                      | Bermuda                          | 67.2   | 52.0 | 71.5   | NA   | 85.0   | 72.5 | 88.2   | NA   |
|                      | Bhutan                           | 17.4   | 9.9  | 11.0   | NA   | 48.5   | 39.8 | 49.0   | NA   |
|                      | Bolivia (Plurinational State of) | 18.3   | 11.7 | 13.3   | NA   | 46.5   | 35.6 | 48.2   | NA   |
|                      | Bosnia and Herzegovina           | 68.6   | 94.7 | 59.5   | NA   | 74.8   | 72.6 | 75.5   | NA   |
|                      | Botswana                         | 27.3   | 30.2 | 28.2   | NA   | 44.6   | 44.4 | 48.8   | NA   |
|                      | Brazil                           | 47.2   | 40.2 | 45.3   | NA   | 67.8   | 55.9 | 68.8   | NA   |
|                      | Brunei Darussalam                | 73.6   | 46.3 | 64.9   | NA   | 79.7   | 61.4 | 77.6   | NA   |
|                      | Bulgaria                         | 76.2   | 86.6 | 72.8   | NA   | 80.7   | 81.9 | 81.6   | NA   |

| Scale | Location                              | 1990   |      |        |      | 2019   |      |        |      |
|-------|---------------------------------------|--------|------|--------|------|--------|------|--------|------|
|       |                                       | QCI    |      | rQCI   |      | QCI    |      | rQCI   |      |
|       |                                       | Female | Male | Female | Male | Female | Male | Female | Male |
|       | Burkina Faso                          | 10.7   | 17.0 | 13.1   | NA   | 22.8   | 24.4 | 26.3   | NA   |
|       | Burundi                               | 4.9    | 3.2  | 4.7    | NA   | 20.0   | 16.5 | 20.1   | NA   |
|       | Cabo Verde                            | 32.4   | 36.6 | 31.7   | NA   | 52.5   | 48.0 | 57.2   | NA   |
|       | Cambodia                              | 24.3   | 11.1 | 15.7   | NA   | 44.1   | 32.8 | 41.9   | NA   |
|       | Cameroon                              | 14.4   | 19.0 | 14.5   | NA   | 27.9   | 27.8 | 30.9   | NA   |
|       | Canada                                | 88.0   | 93.3 | 87.3   | NA   | 95.8   | 93.4 | 94.3   | NA   |
|       | Central African Republic              | 3.3    | 8.0  | 2.8    | NA   | 5.3    | 13.1 | 5.2    | NA   |
|       | Chad                                  | 14.5   | 14.6 | 12.2   | NA   | 17.5   | 18.0 | 18.8   | NA   |
|       | Chile                                 | 63.4   | 56.7 | 59.6   | NA   | 80.5   | 76.2 | 81.0   | NA   |
|       | China                                 | 61.1   | 54.8 | 56.0   | NA   | 84.5   | 73.4 | 85.8   | NA   |
|       | Colombia                              | 52.5   | 36.3 | 52.5   | NA   | 76.1   | 61.8 | 77.5   | NA   |
|       | Comoros                               | 10.8   | 9.6  | 10.4   | NA   | 24.6   | 21.9 | 26.9   | NA   |
|       | Congo                                 | 7.2    | 13.6 | 8.9    | NA   | 22.9   | 28.4 | 27.1   | NA   |
|       | Cook Islands                          | 53.8   | 52.7 | 54.4   | NA   | 67.8   | 67.3 | 70.6   | NA   |
|       | Costa Rica                            | 67.5   | 48.5 | 68.7   | NA   | 78.3   | 64.1 | 81.6   | NA   |
|       | Côte d'Ivoire                         | 17.4   | 19.2 | 17.9   | NA   | 24.5   | 25.4 | 27.7   | NA   |
|       | Croatia                               | 74.5   | 77.6 | 74.3   | NA   | 84.5   | 85.1 | 85.8   | NA   |
|       | Cuba                                  | 68.2   | 48.6 | 69.3   | NA   | 78.3   | 65.4 | 81.6   | NA   |
|       | Cyprus                                | 85.0   | 66.4 | 78.8   | NA   | 94.1   | 93.4 | 93.6   | NA   |
|       | Czechia                               | 73.5   | 75.7 | 72.9   | NA   | 88.0   | 87.5 | 87.3   | NA   |
|       | Democratic People's Republic of Korea | 57.1   | 42.2 | 50.6   | NA   | 58.9   | 46.7 | 55.4   | NA   |
|       | Democratic Republic of the Congo      | 9.5    | 16.6 | 9.2    | NA   | 17.3   | 24.7 | 19.5   | NA   |
|       | Denmark                               | 74.9   | 79.4 | 73.1   | NA   | 91.7   | 93.0 | 90.0   | NA   |
|       | Djibouti                              | 16.1   | 14.5 | 16.7   | NA   | 28.1   | 25.8 | 32.6   | NA   |
|       | Dominica                              | 55.5   | 41.1 | 55.8   | NA   | 58.3   | 44.6 | 60.4   | NA   |
|       | Dominican Republic                    | 48.7   | 29.5 | 44.2   | NA   | 61.3   | 44.3 | 61.3   | NA   |
|       | Ecuador                               | 37.3   | 25.4 | 33.8   | NA   | 62.8   | 53.3 | 64.4   | NA   |
|       | Egypt                                 | 51.3   | 56.7 | 41.3   | NA   | 62.5   | 64.0 | 60.0   | NA   |
|       | El Salvador                           | 47.9   | 29.1 | 42.2   | NA   | 68.9   | 51.8 | 70.2   | NA   |
|       | Equatorial Guinea                     | 5.3    | 8.0  | 3.1    | NA   | 32.1   | 35.4 | 39.0   | NA   |
|       | Eritrea                               | 3.5    | 1.6  | 1.8    | NA   | 16.6   | 16.5 | 17.9   | NA   |
|       | Estonia                               | 72.0   | 63.2 | 68.7   | NA   | 86.4   | 77.3 | 86.5   | NA   |
|       | Eswatini                              | 22.1   | 23.9 | 25.1   | NA   | 28.3   | 27.9 | 33.3   | NA   |
|       | Ethiopia                              | 2.1    | 3.6  | 1.2    | NA   | 26.0   | 23.7 | 28.5   | NA   |
|       | Fiji                                  | 36.0   | 40.0 | 31.0   | NA   | 41.0   | 44.6 | 40.7   | NA   |
|       | Finland                               | 89.8   | 78.9 | 83.9   | NA   | 98.8   | 92.6 | 95.2   | NA   |
|       | France                                | 84.5   | 79.2 | 79.6   | NA   | 96.4   | 91.4 | 92.2   | NA   |
|       | Gabon                                 | 17.8   | 21.7 | 19.1   | NA   | 34.2   | 35.1 | 38.3   | NA   |
|       | Gambia                                | 26.3   | 20.6 | 24.3   | NA   | 28.2   | 26.6 | 29.9   | NA   |
|       | Georgia                               | 61.2   | 69.1 | 58.9   | NA   | 70.1   | 59.9 | 66.7   | NA   |
|       | Germany                               | 83.1   | 81.4 | 78.1   | NA   | 92.9   | 92.0 | 90.8   | NA   |

| Scale | Location                         | 1990   |      |        |      | 2019   |      |        |      |
|-------|----------------------------------|--------|------|--------|------|--------|------|--------|------|
|       |                                  | QCI    |      | rQCI   |      | QCI    |      | rQCI   |      |
|       |                                  | Female | Male | Female | Male | Female | Male | Female | Male |
|       | Ghana                            | 16.7   | 21.8 | 16.9   | NA   | 33.4   | 31.0 | 36.1   | NA   |
|       | Greece                           | 89.9   | 87.7 | 83.5   | NA   | 93.0   | 87.7 | 90.8   | NA   |
|       | Greenland                        | 62.6   | 25.9 | 56.8   | NA   | 75.6   | 65.3 | 72.4   | NA   |
|       | Grenada                          | 50.0   | 36.2 | 49.7   | NA   | 62.0   | 54.9 | 64.9   | NA   |
|       | Guam                             | 59.5   | 62.1 | 58.7   | NA   | 65.9   | 64.6 | 64.3   | NA   |
|       | Guatemala                        | 34.6   | 27.5 | 27.9   | NA   | 55.5   | 50.6 | 56.0   | NA   |
|       | Guinea                           | 9.8    | 14.4 | 10.0   | NA   | 19.4   | 20.1 | 20.9   | NA   |
|       | Guinea-Bissau                    | 8.7    | 10.8 | 7.1    | NA   | 19.0   | 19.5 | 19.3   | NA   |
|       | Guyana                           | 41.0   | 27.3 | 38.5   | NA   | 51.5   | 38.4 | 50.8   | NA   |
|       | Haiti                            | 15.1   | 10.1 | 11.1   | NA   | 28.7   | 20.5 | 26.2   | NA   |
|       | Honduras                         | 39.1   | 22.4 | 33.9   | NA   | 53.3   | 35.9 | 56.2   | NA   |
|       | Hungary                          | 68.1   | 68.8 | 67.1   | NA   | 83.1   | 83.0 | 82.7   | NA   |
|       | Iceland                          | 89.0   | 79.3 | 85.8   | NA   | 100.0  | 93.7 | 93.8   | NA   |
|       | India                            | 25.6   | 21.7 | 21.3   | NA   | 43.4   | 49.4 | 43.1   | NA   |
|       | Indonesia                        | 32.7   | 33.5 | 22.7   | NA   | 50.8   | 41.1 | 45.0   | NA   |
|       | Iran (Islamic Republic of)       | 60.4   | 56.3 | 54.2   | NA   | 75.1   | 74.5 | 74.1   | NA   |
|       | Iraq                             | 44.6   | 40.1 | 39.6   | NA   | 64.8   | 58.3 | 62.2   | NA   |
|       | Ireland                          | 81.6   | 80.8 | 79.2   | NA   | 95.8   | 92.9 | 93.3   | NA   |
|       | Israel                           | 78.3   | 74.1 | 74.3   | NA   | 91.6   | 85.5 | 89.0   | NA   |
|       | Italy                            | 89.1   | 99.7 | 84.6   | NA   | 98.6   | 93.6 | 93.9   | NA   |
|       | Jamaica                          | 60.6   | 48.0 | 60.0   | NA   | 67.4   | 54.0 | 68.3   | NA   |
|       | Japan                            | 98.9   | 85.1 | 88.5   | NA   | 99.8   | 91.7 | 95.2   | NA   |
|       | Jordan                           | 49.9   | 41.6 | 45.6   | NA   | 72.6   | 66.7 | 73.1   | NA   |
|       | Kazakhstan                       | 56.5   | 63.1 | 51.6   | NA   | 70.5   | 67.0 | 69.6   | NA   |
|       | Kenya                            | 23.7   | 18.5 | 24.0   | NA   | 27.0   | 25.2 | 29.4   | NA   |
|       | Kiribati                         | 19.7   | 22.6 | 10.5   | NA   | 23.8   | 26.8 | 19.9   | NA   |
|       | Kuwait                           | 68.9   | 61.9 | 67.5   | NA   | 84.5   | 76.1 | 83.5   | NA   |
|       | Kyrgyzstan                       | 50.0   | 71.5 | 44.9   | NA   | 65.4   | 60.7 | 62.9   | NA   |
|       | Lao People's Democratic Republic | 11.2   | 6.4  | 4.2    | NA   | 34.6   | 26.1 | 31.6   | NA   |
|       | Latvia                           | 67.9   | 63.5 | 63.8   | NA   | 79.4   | 75.0 | 79.3   | NA   |
|       | Lebanon                          | 54.6   | 43.2 | 51.8   | NA   | 78.6   | 70.2 | 81.1   | NA   |
|       | Lesotho                          | 21.5   | 22.4 | 22.5   | NA   | 17.8   | 21.5 | 22.4   | NA   |
|       | Liberia                          | 11.9   | 15.5 | 11.2   | NA   | 25.1   | 25.6 | 27.3   | NA   |
|       | Libya                            | 56.5   | 44.0 | 50.1   | NA   | 65.4   | 59.2 | 64.5   | NA   |
|       | Lithuania                        | 73.5   | 68.2 | 68.8   | NA   | 81.3   | 75.0 | 79.0   | NA   |
|       | Luxembourg                       | 81.9   | 79.4 | 79.5   | NA   | 95.7   | 93.5 | 91.9   | NA   |
|       | Madagascar                       | 12.5   | 12.9 | 9.4    | NA   | 21.1   | 20.7 | 21.2   | NA   |
|       | Malawi                           | 13.2   | 12.4 | 14.8   | NA   | 21.0   | 21.8 | 25.4   | NA   |
|       | Malaysia                         | 41.4   | 31.9 | 38.5   | NA   | 64.7   | 53.3 | 66.1   | NA   |
|       | Maldives                         | 34.0   | 27.6 | 30.7   | NA   | 70.7   | 64.0 | 72.5   | NA   |
|       | Mali                             | 11.3   | 17.6 | 9.0    | NA   | 26.2   | 25.6 | 25.8   | NA   |

| Scale | Location                         | 1990   |      |        |      | 2019   |      |        |      |
|-------|----------------------------------|--------|------|--------|------|--------|------|--------|------|
|       |                                  | QCI    |      | rQCI   |      | QCI    |      | rQCI   |      |
|       |                                  | Female | Male | Female | Male | Female | Male | Female | Male |
|       | Malta                            | 77.6   | 80.5 | 75.1   | NA   | 92.2   | 94.5 | 89.2   | NA   |
|       | Marshall Islands                 | 31.8   | 26.6 | 23.1   | NA   | 32.9   | 31.6 | 29.6   | NA   |
|       | Mauritania                       | 13.8   | 17.3 | 13.1   | NA   | 34.8   | 33.7 | 37.6   | NA   |
|       | Mauritius                        | 57.5   | 46.7 | 53.0   | NA   | 67.1   | 56.7 | 66.6   | NA   |
|       | Mexico                           | 53.3   | 46.2 | 52.0   | NA   | 71.5   | 59.9 | 72.8   | NA   |
|       | Micronesia (Federated States of) | 28.9   | 31.1 | 21.2   | NA   | 39.8   | 39.5 | 38.9   | NA   |
|       | Monaco                           | 88.2   | 81.3 | 85.9   | NA   | 92.1   | 86.5 | 92.6   | NA   |
|       | Mongolia                         | 48.1   | 50.5 | 38.1   | NA   | 55.0   | 56.0 | 54.1   | NA   |
|       | Montenegro                       | 74.8   | 75.0 | 73.0   | NA   | 81.4   | 78.1 | 81.4   | NA   |
|       | Morocco                          | 36.7   | 32.9 | 30.1   | NA   | 58.3   | 49.0 | 55.8   | NA   |
|       | Mozambique                       | 5.9    | 60.0 | 6.7    | NA   | 16.0   | 49.9 | 20.5   | NA   |
|       | Myanmar                          | 13.3   | 10.7 | 7.4    | NA   | 46.6   | 31.7 | 43.2   | NA   |
|       | Namibia                          | 19.5   | 17.0 | 18.2   | NA   | 38.9   | 32.3 | 41.3   | NA   |
|       | Nauru                            | 45.5   | 42.9 | 40.5   | NA   | 53.4   | 47.7 | 52.4   | NA   |
|       | Nepal                            | 13.7   | 7.1  | 7.8    | NA   | 38.1   | 30.0 | 37.3   | NA   |
|       | Netherlands                      | 85.8   | 86.3 | 83.8   | NA   | 95.6   | 91.9 | 93.5   | NA   |
|       | New Zealand                      | 86.8   | 31.7 | 84.5   | NA   | 97.4   | 38.0 | 94.0   | NA   |
|       | Nicaragua                        | 53.3   | 30.8 | 46.7   | NA   | 69.0   | 54.4 | 71.9   | NA   |
|       | Niger                            | 12.7   | 13.0 | 10.5   | NA   | 22.0   | 21.6 | 23.4   | NA   |
|       | Nigeria                          | 18.6   | 33.9 | 18.9   | NA   | 31.4   | 38.6 | 34.8   | NA   |
|       | Niue                             | 51.9   | 48.2 | 47.7   | NA   | 63.0   | 57.8 | 65.2   | NA   |
|       | North Macedonia                  | 65.8   | 66.5 | 59.0   | NA   | 76.5   | 77.8 | 76.5   | NA   |
|       | Northern Mariana Islands         | 61.0   | 77.6 | 59.1   | NA   | 72.1   | 74.0 | 70.9   | NA   |
|       | Norway                           | 84.0   | 79.8 | 78.5   | NA   | 98.1   | 96.1 | 93.2   | NA   |
|       | Oman                             | 63.4   | 41.7 | 55.6   | NA   | 77.1   | 66.7 | 78.1   | NA   |
|       | Pakistan                         | 16.4   | 14.7 | 12.4   | NA   | 31.2   | 27.4 | 30.5   | NA   |
|       | Palau                            | 53.4   | 55.6 | 51.9   | NA   | 64.2   | 62.0 | 65.7   | NA   |
|       | Palestine                        | 50.9   | 50.8 | 47.7   | NA   | 62.5   | 60.0 | 64.4   | NA   |
|       | Panama                           | 59.9   | 39.8 | 59.2   | NA   | 74.4   | 59.8 | 76.6   | NA   |
|       | Papua New Guinea                 | 19.1   | 23.4 | 11.4   | NA   | 28.5   | 26.7 | 22.9   | NA   |
|       | Paraguay                         | 48.2   | 33.6 | 45.4   | NA   | 64.1   | 50.8 | 66.0   | NA   |
|       | Peru                             | 37.6   | 25.5 | 33.0   | NA   | 67.3   | 54.5 | 67.7   | NA   |
|       | Philippines                      | 36.4   | 37.3 | 35.0   | NA   | 48.8   | 43.7 | 47.4   | NA   |
|       | Poland                           | 61.0   | 69.1 | 56.9   | NA   | 78.8   | 80.0 | 79.4   | NA   |
|       | Portugal                         | 82.4   | 68.5 | 76.2   | NA   | 96.6   | 88.7 | 91.9   | NA   |
|       | Puerto Rico                      | 71.3   | 53.8 | 71.1   | NA   | 83.4   | 70.1 | 84.9   | NA   |
|       | Qatar                            | 54.2   | 52.0 | 52.4   | NA   | 74.8   | 75.9 | 81.3   | NA   |
|       | Republic of Korea                | 93.4   | 63.3 | 73.7   | NA   | 95.7   | 85.2 | 93.4   | NA   |
|       | Republic of Moldova              | 61.6   | 61.9 | 56.1   | NA   | 74.5   | 66.4 | 72.3   | NA   |
|       | Romania                          | 64.2   | 66.3 | 57.3   | NA   | 75.8   | 76.0 | 75.4   | NA   |
|       | Russian Federation               | 73.1   | 63.2 | 66.4   | NA   | 81.1   | 78.1 | 80.2   | NA   |

| Scale | Location                         | 1990   |      |        |      | 2019   |      |        |      |
|-------|----------------------------------|--------|------|--------|------|--------|------|--------|------|
|       |                                  | QCI    |      | rQCI   |      | QCI    |      | rQCI   |      |
|       |                                  | Female | Male | Female | Male | Female | Male | Female | Male |
|       | Rwanda                           | 1.8    | 3.3  | 3.1    | NA   | 26.8   | 23.9 | 30.3   | NA   |
|       | Saint Kitts and Nevis            | 56.7   | 38.8 | 59.5   | NA   | 69.5   | 54.0 | 75.7   | NA   |
|       | Saint Lucia                      | 51.0   | 33.5 | 50.8   | NA   | 65.9   | 50.6 | 67.3   | NA   |
|       | Saint Vincent and the Grenadines | 52.2   | 36.0 | 52.7   | NA   | 58.9   | 43.4 | 60.7   | NA   |
|       | Samoa                            | 44.3   | 40.4 | 37.0   | NA   | 52.4   | 47.7 | 49.1   | NA   |
|       | San Marino                       | 90.8   | 88.5 | 85.8   | NA   | 93.3   | 93.0 | 91.4   | NA   |
|       | Sao Tome and Principe            | 24.2   | 26.4 | 22.9   | NA   | 37.1   | 37.4 | 40.2   | NA   |
|       | Saudi Arabia                     | 51.7   | 45.9 | 38.0   | NA   | 76.2   | 72.1 | 75.5   | NA   |
|       | Senegal                          | 14.9   | 17.7 | 14.4   | NA   | 26.6   | 25.8 | 27.8   | NA   |
|       | Serbia                           | 65.1   | 64.6 | 61.6   | NA   | 77.1   | 75.3 | 79.2   | NA   |
|       | Seychelles                       | 48.3   | 41.4 | 42.3   | NA   | 62.8   | 54.5 | 62.4   | NA   |
|       | Sierra Leone                     | 15.8   | 16.2 | 15.1   | NA   | 23.2   | 24.0 | 26.0   | NA   |
|       | Singapore                        | 86.1   | 69.8 | 78.8   | NA   | 96.2   | 90.2 | 93.0   | NA   |
|       | Slovakia                         | 68.9   | 69.6 | 65.2   | NA   | 81.1   | 81.1 | 83.1   | NA   |
|       | Slovenia                         | 73.9   | 71.8 | 72.8   | NA   | 88.2   | 86.2 | 87.3   | NA   |
|       | Solomon Islands                  | 37.6   | 31.5 | 26.0   | NA   | 34.9   | 36.6 | 30.5   | NA   |
|       | Somalia                          | 6.1    | 6.7  | NA     | NA   | 8.2    | 12.7 | NA*    | NA   |
|       | South Africa                     | 33.3   | 37.4 | 32.2   | NA   | 43.8   | 43.8 | 47.5   | NA   |
|       | South Sudan                      | 10.7   | 9.7  | 10.3   | NA   | 16.0   | 16.4 | 17.9   | NA   |
|       | Spain                            | 85.7   | 91.7 | 78.8   | NA   | 96.8   | 95.3 | 92.5   | NA   |
|       | Sri Lanka                        | 52.4   | 38.7 | 47.0   | NA   | 69.3   | 61.5 | 70.4   | NA   |
|       | Sudan                            | 36.9   | 25.2 | 26.4   | NA   | 50.8   | 44.7 | 47.7   | NA   |
|       | Suriname                         | 46.4   | 29.7 | 44.4   | NA   | 54.7   | 40.3 | 55.6   | NA   |
|       | Sweden                           | 90.8   | 91.3 | 86.2   | NA   | 97.1   | 96.7 | 94.0   | NA   |
|       | Switzerland                      | 83.1   | 83.3 | 81.2   | NA   | 97.0   | 98.0 | 93.0   | NA   |
|       | Syrian Arab Republic             | 61.8   | 58.4 | 49.8   | NA   | 69.6   | 69.7 | 68.4   | NA   |
|       | Taiwan (Province of China)       | 75.0   | 55.0 | 67.9   | NA   | 89.1   | 75.5 | 86.3   | NA   |
|       | Tajikistan                       | 48.3   | 58.2 | 39.8   | NA   | 51.1   | 51.1 | 48.7   | NA   |
|       | Thailand                         | 50.6   | 34.3 | 44.2   | NA   | 75.6   | 64.6 | 72.3   | NA   |
|       | Timor-Leste                      | 20.5   | 13.0 | 14.1   | NA   | 35.9   | 28.9 | 35.0   | NA   |
|       | Togo                             | 18.3   | 21.3 | 18.9   | NA   | 27.4   | 27.0 | 30.3   | NA   |
|       | Tokelau                          | 37.5   | 37.2 | 31.3   | NA   | 53.3   | 49.7 | 53.4   | NA   |
|       | Tonga                            | 39.4   | 50.2 | 34.5   | NA   | 49.7   | 54.0 | 47.8   | NA   |
|       | Trinidad and Tobago              | 51.0   | 42.3 | 51.8   | NA   | 64.6   | 49.3 | 66.0   | NA   |
|       | Tunisia                          | 58.3   | 47.7 | 53.5   | NA   | 76.1   | 68.4 | 75.7   | NA   |
|       | Turkey                           | 48.8   | 39.2 | 41.3   | NA   | 75.4   | 68.9 | 75.8   | NA   |
|       | Turkmenistan                     | 51.1   | 66.5 | 44.0   | NA   | 63.9   | 57.1 | 45.0   | NA   |
|       | Tuvalu                           | 30.5   | 30.8 | 25.0   | NA   | 43.0   | 40.8 | 42.9   | NA   |
|       | Uganda                           | 13.7   | 9.6  | 15.0   | NA   | 27.7   | 23.7 | 28.3   | NA   |
|       | Ukraine                          | 59.0   | 80.4 | 51.7   | NA   | 69.5   | 68.0 | 64.6   | NA   |
|       | United Arab Emirates             | 50.6   | 42.2 | 45.6   | NA   | 65.6   | 59.9 | 62.9   | NA   |

| Scale | Location                           | 1990   |      |        |      | 2019   |      |        |      |
|-------|------------------------------------|--------|------|--------|------|--------|------|--------|------|
|       |                                    | QCI    |      | rQCI   |      | QCI    |      | rQCI   |      |
|       |                                    | Female | Male | Female | Male | Female | Male | Female | Male |
|       | United Kingdom                     | 80.6   | 81.4 | 78.7   | NA   | 93.6   | 90.9 | 91.8   | NA   |
|       | United Republic of Tanzania        | 16.4   | 13.7 | 20.0   | NA   | 25.4   | 24.8 | 30.3   | NA   |
|       | United States of America           | 89.6   | 97.2 | 88.3   | NA   | 97.0   | 98.6 | 94.0   | NA   |
|       | United States Virgin Islands       | 59.1   | 40.6 | 61.1   | NA   | 69.9   | 52.4 | 73.4   | NA   |
|       | Uruguay                            | 59.0   | 55.2 | 59.1   | NA   | 75.4   | 66.3 | 75.7   | NA   |
|       | Uzbekistan                         | 60.0   | 84.4 | 50.6   | NA   | 64.2   | 63.2 | 62.0   | NA   |
|       | Vanuatu                            | 32.5   | 28.5 | 25.2   | NA   | 27.6   | 29.4 | 25.4   | NA   |
|       | Venezuela (Bolivarian Republic of) | 53.1   | 32.6 | 52.0   | NA   | 71.4   | 54.5 | 73.3   | NA   |
|       | Viet Nam                           | 36.7   | 19.5 | 32.2   | NA   | 63.4   | 49.4 | 63.7   | NA   |
|       | Yemen                              | 37.6   | 25.5 | 27.8   | NA   | 44.0   | 41.7 | 40.3   | NA   |
|       | Zambia                             | 8.3    | 8.8  | 12.1   | NA   | 27.5   | 23.8 | 31.3   | NA   |
|       | Zimbabwe                           | 29.9   | 35.4 | 32.2   | NA   | 25.3   | 30.3 | 27.5   | NA   |

\* NA: not applicable due to lack of data for rQCI calculation in males and country Somalia.
